# Supplementary material for: Responses of carbapenemase-producing and non-producing carbapenem-resistant Pseudomonas aeruginosa strains to meropenem revealed by quantitative tandem mass spectrometry proteomics
Source: Front Microbiol. 2023 Feb 9;13:1089140. doi: 10.3389/fmicb.2022.1089140 (PMC9948630; doi:10.3389/fmicb.2022.1089140)
Supplement: SUPPLEMENTARY TABLE 2 — List of proteins of Pseudomonas aeruginosa CCUG 51971 detected with more than one peptide. The table includes their relative abundances (sub-MICs vs. no antibiotic; if quantitated), basal relative abundance compared to strain PAO1 (if fulfilling the criteria for being included in the inter-strain the comparison, i.e., ≥99% of sequence identity and with 100% coverage over the longer protein), P. aeruginosa PAO1 orthologues and functional annotations. Orthologous proteins differentially regulated in both strains are in bold and shaded. Gene expression data from the publicly available transcriptomic dataset that analyzed biofilms of P. aeruginosa PAO1 treated with meropenem (5 μg/ml) vs. no antibiotic (GEO accession number: GSE167137) is included in columns AA – AC. [file Table_2.XLSX]

## Sheet: Proteins CCUG 51971 (>1 pept.)
Supplementary table 2. List of proteins of Pseudomonas aeruginosa CCUG 51971 detected with more than one peptide.
											8 µg/ml VS 0 µg/ml			128 µg/ml VS 0 µg/ml			256 µg/ml VS 0 µg/ml			0 µg/ml VS CCUG 56489 (= PAO1) 0 µg/ml			P. aeruginosa PAO1 orthologues			GEO dataset GSE167137 (P. aeruginosa PAO1 biofilm treated with 5 µg/ml meropenem VS 0 µg/ml)
Accession	Protein description	Coverage [%]	# Peptides	# PSMs	# Unique Peptides	Molecular weight [kDa]	Mascot score	# Peptides (by Search Engine): Mascot	# Razor Peptides	Quantitation	Fold change	p-value	Regulation	Fold change	p-value	Regulation	Fold change	p-value	Regulation	Fold change	p-value	Basal abundance	PAO1 locus tag	Gene name	Product description	ID	Fold change	p-value	COG categories	Gene Onthology (GO) IDs	GO names	Enzyme Comission (EC) numbers	Enzyme Names	InterPro IDs	InterPro GO IDs	InterPro GO names
WP_003096758.1	MULTISPECIES: hypothetical protein [Pseudomonas]	35	3	9	3	12.4	316	3	0	Yes	1.6553	0.203187		-1.1046	0.636534		60.7008	8.72861e-07	Up	-1.38636	0.463442		PA5406		hypothetical protein	PA5406	-1.0256	0.809615						Coil (COILS)	no GO terms	no GO terms
WP_031691625.1	S49 family peptidase [Pseudomonas aeruginosa]	19	5	8	5	42.3	334	5	0	Yes	1.44404	0.125397		-1.24714	0.47717		53.2404	2.9204e-05	Up										OU	P:GO:0006508; F:GO:0008233	P:proteolysis; F:peptidase activity	EC:3.4	Acting on peptide bonds (peptidases)	G3DSA:3.90.226.10 (GENE3D); IPR002142 (PFAM); PTHR33209 (PANTHER); IPR033855 (CDD); IPR029045 (SUPERFAMILY)	P:GO:0006508; F:GO:0008233	P:proteolysis; F:peptidase activity
WP_034085331.1	hypothetical protein [Pseudomonas aeruginosa]	26	8	14	8	38.6	347	8	0	Yes	1.62048	0.144299		-1.15881	0.511328		41.9021	4.52773e-06	Up										S					Coil (COILS); mobidb-lite (MOBIDB_LITE); mobidb-lite (MOBIDB_LITE)	no GO terms	no GO terms
WP_003083632.1	MULTISPECIES: SUMF1/EgtB/PvdO family nonheme iron enzyme [Pseudomonas]	6	3	4	3	61.8	115	3	0	Yes	2.41535	0.00211692	Up	-2.13247	0.0549412	Down	41.4689	4.7775e-05	Up	2.64839	0.110815		PA0071	tagR1	TagR1	PA0071	2.07622	0.000223392	S					Coil (COILS); Coil (COILS); IPR005532 (PFAM); IPR042095 (G3DSA:3.90.1580.GENE3D); PTHR23150 (PANTHER); PTHR23150:SF31 (PANTHER); IPR016187 (SUPERFAMILY)	no GO terms	no GO terms
WP_107236434.1	filamentous hemagglutinin N-terminal domain-containing protein [Pseudomonas aeruginosa]	24	19	37	19	219.5	1341	19	0	Yes	1.03906	0.425522		1.02634	0.822582		29.5813	8.20728e-10	Up										U					G3DSA:3.30.160.710 (GENE3D); IPR008638 (PFAM); IPR041286 (PFAM); IPR008638 (TIGRFAM); IPR012334 (G3DSA:2.160.20.GENE3D); PTHR12338:SF8 (PANTHER); PTHR12338:SF8 (PANTHER); PTHR12338 (PANTHER); PTHR12338 (PANTHER); IPR011050 (SUPERFAMILY)	no GO terms	no GO terms
WP_003093522.1	MULTISPECIES: SH3 domain-containing protein [Pseudomonas]	36	8	16	8	24.1	502	8	0	Yes	1.69598	0.000270533	Up	1.13958	0.398907		25.4512	1.01606e-06	Up	-1.05354	0.668558		PA4154		conserved hypothetical protein	PA4154	1.03473	0.840674	T	C:GO:0005829; C:GO:0005887	C:cytosol; C:integral component of plasma membrane			Coil (COILS); Coil (COILS); IPR003646 (PFAM); G3DSA:2.30.30.40 (GENE3D); IPR016476 (PIRSF); IPR016476 (TIGRFAM); IPR003646 (PROSITE_PROFILES)	no GO terms	no GO terms
WP_032492008.1	MULTISPECIES: subclass B1 metallo-beta-lactamase VIM-4 [Proteobacteria]	32	6	38	6	28.1	1456	6	0	Yes	-1.0303	0.779177		1.0178	0.814389		24.9094	1.52165e-05	Up										S	P:GO:0006805; P:GO:0017001; F:GO:0008270; F:GO:0008800	P:xenobiotic metabolic process; P:antibiotic catabolic process; F:zinc ion binding; F:beta-lactamase activity	EC:3.5.2.6	Beta-lactamase	IPR036866 (G3DSA:3.60.15.GENE3D); IPR001279 (PFAM); PTHR42951 (PANTHER); PTHR42951:SF10 (PANTHER); cd16303 (CDD); IPR036866 (SUPERFAMILY)	no GO terms	no GO terms
WP_031630972.1	MULTISPECIES: hypothetical protein [Pseudomonas]	36	7	14	7	26.5	362	7	0	Yes	1.09006	0.672487		1.21118	0.22944		22.0241	6.17682e-05	Up															no IPS match	no IPS match	no IPS match
WP_003094995.1	MULTISPECIES: peptide chain release factor N(5)-glutamine methyltransferase [Pseudomonas]	8	2	3	2	30.4	157	2	0	Yes	1.15021	0.485373		-1.77186	0.594881		20.7897	0.01475	Up	3.08609	0.239242		PA4664	prmC	S-adenosylmethionine-dependent methyltransferase, PrmC				J	P:GO:0006415; P:GO:0010468; P:GO:0018364; F:GO:0003676; F:GO:0036009; F:GO:0102559	P:translational termination; P:regulation of gene expression; P:peptidyl-glutamine methylation; F:nucleic acid binding; F:protein-glutamine N-methyltransferase activity; F:protein-(glutamine-N5) methyltransferase activity	EC:2.1.1.297	Peptide chain release factor N(5)-glutamine methyltransferase	Coil (COILS); IPR004556 (TIGRFAM); G3DSA:3.40.50.150 (GENE3D); IPR040758 (PFAM); G3DSA:1.10.8.10 (GENE3D); IPR019874 (TIGRFAM); IPR007848 (PFAM); PTHR18895 (PANTHER); IPR002052 (PROSITE_PATTERNS); IPR019874 (HAMAP); cd02440 (CDD); IPR029063 (SUPERFAMILY)	P:GO:0006479; P:GO:0032259; F:GO:0003676; F:GO:0008168; F:GO:0008276	P:protein methylation; P:methylation; F:nucleic acid binding; F:methyltransferase activity; F:protein methyltransferase activity
WP_031691636.1	hypothetical protein [Pseudomonas aeruginosa]	36	5	9	5	20.5	364	5	0	Yes	1.07264	0.636692		1.11864	0.274298		17.2149	4.8781e-07	Up											C:GO:0016021	C:integral component of membrane			Coil (COILS)	no GO terms	no GO terms
WP_003093184.1	MULTISPECIES: septal ring lytic transglycosylase RlpA family protein [Pseudomonas]	18	5	10	5	36.4	348	5	0	Yes	-1.09979	0.935594		1.30329	0.449851		16.6793	0.00127238	Up				PA4000	rlpA	RlpA	PA4000	1.27079	0.0630184	M	P:GO:0000270; P:GO:0071555; F:GO:0008932; F:GO:0016829; F:GO:0042834; C:GO:0005886; C:GO:0009279	P:peptidoglycan metabolic process; P:cell wall organization; F:lytic endotransglycosylase activity; F:lyase activity; F:peptidoglycan binding; C:plasma membrane; C:cell outer membrane	EC:4; EC:3.2.1; EC:2.4.99	Lyases; Glycosylases; Glycosyltransferases	IPR007730 (PFAM); IPR036680 (G3DSA:3.30.70.GENE3D); IPR009009 (PFAM); IPR012997 (TIGRFAM); IPR036908 (G3DSA:2.40.40.GENE3D); PTHR34183 (PANTHER); PTHR34183:SF1 (PANTHER); IPR007730 (PROSITE_PROFILES); PS51257 (PROSITE_PROFILES); IPR034718 (HAMAP); IPR036908 (SUPERFAMILY); IPR036680 (SUPERFAMILY)	F:GO:0016829; F:GO:0042834	F:lyase activity; F:peptidoglycan binding
WP_003092371.1	MULTISPECIES: ribonuclease HII [Pseudomonas]	20	4	6	4	21.7	128	4	0	Yes	1.02247	0.948823		1.8427	3.56815e-05	Up	15.5562	2.48719e-08	Up				PA3642	rnhB	ribonuclease HII	rnhB	-1.9283	0.00209786	L	P:GO:0006401; P:GO:0090502; F:GO:0003723; F:GO:0004523; F:GO:0030145; C:GO:0005737	P:RNA catabolic process; P:RNA phosphodiester bond hydrolysis, endonucleolytic; F:RNA binding; F:RNA-DNA hybrid ribonuclease activity; F:manganese ion binding; C:cytoplasm	EC:3.1.30; EC:3.1.26.4	Acting on ester bonds; Ribonuclease H	IPR024567 (PFAM); IPR036397 (G3DSA:3.30.420.GENE3D); IPR001352 (PANTHER); IPR022898 (PTHR10954:PANTHER); IPR022898 (HAMAP); IPR022898 (CDD); IPR012337 (SUPERFAMILY)	F:GO:0003676; F:GO:0003723; F:GO:0004523	F:nucleic acid binding; F:RNA binding; F:RNA-DNA hybrid ribonuclease activity
WP_034085329.1	single-stranded DNA-binding protein [Pseudomonas aeruginosa]	17	3	19	1	19.2	445	3	0	Yes	1.09135	0.470529		-1.13973	0.114334		13.9361	2.93491e-06	Up										L	P:GO:0006260; P:GO:0043085; F:GO:0003697; F:GO:0008047; F:GO:0042802; C:GO:0005829	P:DNA replication; P:positive regulation of catalytic activity; F:single-stranded DNA binding; F:enzyme activator activity; F:identical protein binding; C:cytosol			IPR011344 (TIGRFAM); G3DSA:2.40.50.140 (GENE3D); IPR011344 (PIRSF); IPR000424 (PFAM); mobidb-lite (MOBIDB_LITE); mobidb-lite (MOBIDB_LITE); IPR011344 (PANTHER); PTHR10302:SF0 (PANTHER); IPR000424 (PROSITE_PROFILES); IPR011344 (HAMAP); IPR000424 (CDD); IPR012340 (SUPERFAMILY)	P:GO:0006260; F:GO:0003697	P:DNA replication; F:single-stranded DNA binding
WP_003085151.1	MULTISPECIES: bacteriophage protein [Pseudomonas]	39	8	12	8	31.9	347	8	0	Yes	1.21321	0.449772		1.17768	0.258109		12.6485	5.79444e-05	Up	-1.20489	0.346719		PA0618		probable bacteriophage protein	PA0618	-4.41686	3.73e-18	S					IPR014507 (PIRSF); IPR006949 (PFAM); PTHR35862 (PANTHER); PTHR35862:SF1 (PANTHER)	no GO terms	no GO terms
WP_003085178.1	MULTISPECIES: phage tail assembly protein [Pseudomonas]	32	3	5	3	12.5	124	3	0	Yes	1.12688	0.709698		-1.14532	0.632025		12.3349	5.85664e-05	Up	-1.19359	0.597651		PA0624		hypothetical protein	PA0624	-3.77988	9.35e-14	S					IPR019289 (PFAM)	no GO terms	no GO terms
WP_003091604.1	MULTISPECIES: cold-shock protein [Proteobacteria]	51	4	22	4	7.6	365	4	0	Yes	-1.16604	0.17301		-1.34844	0.0536043		12.1288	5.07584e-07	Up				PA3266	capB	cold acclimation protein B	capB	1.48671	0.0684365	K	F:GO:0003676; C:GO:0005737	F:nucleic acid binding; C:cytoplasm			IPR002059 (PRINTS); G3DSA:2.40.50.140 (GENE3D); IPR002059 (PFAM); IPR012156 (PIRSF); PTHR11544:SF126 (PANTHER); PTHR11544 (PANTHER); IPR019844 (PROSITE_PATTERNS); IPR002059 (PROSITE_PROFILES); IPR002059 (CDD); IPR012340 (SUPERFAMILY)	F:GO:0003676	F:nucleic acid binding
WP_003085893.1	MULTISPECIES: D-alanyl-D-alanine endopeptidase [Pseudomonas]	19	4	7	4	34	263	4	0	Yes	-1.1723	0.314658		1.20108	0.231095		11.7529	8.94168e-05	Up	-2.14427	0.0015454	Lower	PA0869	pbpG	D-alanyl-D-alanine-endopeptidase	pbpG	1.25876	0.0517732	M	P:GO:0006508; P:GO:0008360; P:GO:0009410; P:GO:0043093; P:GO:0071555; F:GO:0004175; F:GO:0009002; C:GO:0042597	P:proteolysis; P:regulation of cell shape; P:response to xenobiotic stimulus; P:FtsZ-dependent cytokinesis; P:cell wall organization; F:endopeptidase activity; F:serine-type D-Ala-D-Ala carboxypeptidase activity; C:periplasmic space	EC:3.4.21; EC:3.4.16.4	Acting on peptide bonds (peptidases); Serine-type D-Ala-D-Ala carboxypeptidase	IPR018044 (PRINTS); IPR001967 (PFAM); IPR012338 (G3DSA:3.40.710.GENE3D); PTHR21581:SF26 (PANTHER); PTHR21581 (PANTHER); IPR012338 (SUPERFAMILY)	P:GO:0006508; F:GO:0009002	P:proteolysis; F:serine-type D-Ala-D-Ala carboxypeptidase activity
WP_003086702.1	MULTISPECIES: hypothetical protein [Pseudomonas]	40	3	8	3	12.3	211	3	0	Yes	1.01933	0.79963		-1.51464	0.0174738	Down	11.5931	1.78367e-06	Up				PA1228		hypothetical protein	PA1228	-1.06819	0.619867						mobidb-lite (MOBIDB_LITE); mobidb-lite (MOBIDB_LITE); mobidb-lite (MOBIDB_LITE); mobidb-lite (MOBIDB_LITE)	no GO terms	no GO terms
WP_019725859.1	30S ribosomal protein S12 methylthiotransferase RimO [Pseudomonas aeruginosa]	22	8	22	8	49.5	590	8	0	Yes	1.30314	0.000852964		1.50462	9.5534e-05	Up	11.2569	1.26763e-08	Up										J	P:GO:0006400; P:GO:0018339; F:GO:0035599; F:GO:0046872; F:GO:0051539; F:GO:0103039; C:GO:0005829; C:GO:0005840	P:tRNA modification; P:peptidyl-L-beta-methylthioaspartic acid biosynthetic process from peptidyl-aspartic acid; F:aspartic acid methylthiotransferase activity; F:metal ion binding; F:4 iron, 4 sulfur cluster binding; F:protein methylthiotransferase activity; C:cytosol; C:ribosome	EC:2.8.4.4	[Ribosomal protein S12] (aspartate(89)-C(3))-methylthiotransferase	IPR013848 (PFAM); IPR005839 (TIGRFAM); IPR005840 (TIGRFAM); IPR038135 (G3DSA:3.40.50.GENE3D); G3DSA:2.40.50.140 (GENE3D); IPR023404 (G3DSA:3.80.30.GENE3D); IPR007197 (PFAM); IPR041582 (PFAM); IPR005839 (SFLD); SFLDG01082 (SFLD); IPR005840 (SFLD); IPR005840 (PANTHER); IPR020612 (PROSITE_PATTERNS); PS51257 (PROSITE_PROFILES); IPR007197 (PROSITE_PROFILES); IPR013848 (PROSITE_PROFILES); IPR005840 (HA…	P:GO:0006400; P:GO:0018339; F:GO:0003824; F:GO:0016740; F:GO:0035596; F:GO:0051536; F:GO:0051539; C:GO:0005737	P:tRNA modification; P:peptidyl-L-beta-methylthioaspartic acid biosynthetic process from peptidyl-aspartic acid; F:catalytic activity; F:transferase activity; F:methylthiotransferase activity; F:iron-sulfur cluster binding; F:4 iron, 4 sulfur cluster binding; C:cytoplasm
WP_034085327.1	recombination-associated protein RdgC [Pseudomonas aeruginosa]	13	4	8	4	34.1	316	4	0	Yes	1.25397	0.0232266		1.19121	0.0409354		11.1485	4.73676e-08	Up										L	P:GO:0000018; F:GO:0003690; F:GO:0003697; C:GO:0005829; C:GO:0043590	P:regulation of DNA recombination; F:double-stranded DNA binding; F:single-stranded DNA binding; C:cytosol; C:bacterial nucleoid			Coil (COILS); IPR007476 (PFAM); IPR007476 (PANTHER); IPR007476 (HAMAP)	P:GO:0006310	P:DNA recombination
WP_003083573.1	MULTISPECIES: hypothetical protein [Pseudomonas]	27	4	12	4	22.9	391	4	0	Yes	-1.01212	0.785013		-1.0053	0.896191		10.9415	1.62687e-08	Up										S					IPR008517 (PFAM); G3DSA:3.40.50.10610 (GENE3D); PS51257 (PROSITE_PROFILES)	no GO terms	no GO terms
WP_052160536.1	hypothetical protein [Pseudomonas aeruginosa]	12	3	5	3	27	131	3	0	Yes	1.21584	0.0616042		-1.49797	0.0353601	Down	10.8975	1.51033e-05	Up															IPR042525 (G3DSA:3.30.390.GENE3D)	no GO terms	no GO terms
WP_003091445.1	MULTISPECIES: histidinol-phosphate transaminase [Pseudomonas]	26	9	17	9	39.5	358	9	0	Yes	-1.02673	0.766312		2.27549	8.6573e-05	Up	9.92914	2.62456e-05	Up	1.08386	0.476283		PA3165	hisC2	histidinol-phosphate aminotransferase	hisC2	1.41553	0.127757	E	P:GO:0000105; F:GO:0004400; F:GO:0030170	P:histidine biosynthetic process; F:histidinol-phosphate transaminase activity; F:pyridoxal phosphate binding	EC:2.6.1.9	Histidinol-phosphate transaminase	IPR015421 (G3DSA:3.40.640.GENE3D); IPR015422 (G3DSA:3.90.1150.GENE3D); IPR005861 (TIGRFAM); IPR004839 (PFAM); PTHR43643 (PANTHER); PTHR43643:SF3 (PANTHER); IPR001917 (PROSITE_PATTERNS); IPR005861 (HAMAP); cd00609 (CDD); IPR015424 (SUPERFAMILY)	P:GO:0000105; P:GO:0009058; F:GO:0003824; F:GO:0004400; F:GO:0016740; F:GO:0030170	P:histidine biosynthetic process; P:biosynthetic process; F:catalytic activity; F:histidinol-phosphate transaminase activity; F:transferase activity; F:pyridoxal phosphate binding
WP_003084230.1	MULTISPECIES: M48 family metallopeptidase [Pseudomonas]	38	8	39	8	26.6	1009	8	0	Yes	1.9428	0.000123332	Up	-1.91141	0.000612058	Down	9.5119	2.20065e-05	Up	1.36857	0.00492503		PA0277		putative Zn-dependent peptidase	PA0277	3.26353	2.22e-11	O	P:GO:0006508; F:GO:0004222	P:proteolysis; F:metalloendopeptidase activity	EC:3.4.24	Acting on peptide bonds (peptidases)	IPR001915 (PFAM); G3DSA:3.30.2010.10 (GENE3D); mobidb-lite (MOBIDB_LITE); mobidb-lite (MOBIDB_LITE); PTHR22726 (PANTHER); PTHR22726:SF8 (PANTHER); PS51257 (PROSITE_PROFILES); cd07334 (CDD)	P:GO:0006508; F:GO:0004222	P:proteolysis; F:metalloendopeptidase activity
WP_015649675.1	MULTISPECIES: hypothetical protein [Pseudomonas]	15	2	4	2	16.2	123	2	0	Yes	1.02242	0.924772		1.13694	0.685278		9.45322	0.000621337	Up															Coil (COILS)	no GO terms	no GO terms
WP_003085143.1	MULTISPECIES: hypothetical protein [Pseudomonas]	20	2	4	2	11.9	87	2	0	Yes	-1.1827	0.44475		1.35499	0.13124		9.32269	0.000418121	Up	2.02786	0.0138054	Higher	PA0617		probable bacteriophage protein	PA0617	-3.52803	3.01e-16	S					G3DSA:3.10.450.40 (GENE3D); IPR007048 (PFAM); PTHR35862:SF2 (PANTHER); PTHR35862 (PANTHER); SSF160719 (SUPERFAMILY)	no GO terms	no GO terms
WP_003084824.1	MULTISPECIES: biotin synthase BioB [Pseudomonas]	7	3	7	3	39.1	200	3	0	Yes	1.00969	0.97063		1.45521	0.00668991		9.25747	3.52506e-05	Up	-2.25262	0.000266923	Lower	PA0500	bioB	biotin synthase	bioB	1.00937	0.948146	H	P:GO:0006805; P:GO:0009102; F:GO:0004076; F:GO:0005506; F:GO:0051537; F:GO:0051539; F:GO:1904047; C:GO:0005618; C:GO:0005886	P:xenobiotic metabolic process; P:biotin biosynthetic process; F:biotin synthase activity; F:iron ion binding; F:2 iron, 2 sulfur cluster binding; F:4 iron, 4 sulfur cluster binding; F:S-adenosyl-L-methionine binding; C:cell wall; C:plasma membrane	EC:2.8.1.6	Biotin synthase	IPR024177 (PIRSF); IPR013785 (G3DSA:3.20.20.GENE3D); IPR002684 (TIGRFAM); IPR007197 (PFAM); IPR010722 (PFAM); SFLDG01278 (SFLD); IPR024177 (SFLD); IPR002684 (PANTHER); IPR002684 (HAMAP); IPR007197 (PROSITE_PROFILES); cd01335 (CDD); SSF102114 (SUPERFAMILY)	P:GO:0009102; F:GO:0003824; F:GO:0004076; F:GO:0051536	P:biotin biosynthetic process; F:catalytic activity; F:biotin synthase activity; F:iron-sulfur cluster binding
WP_003085861.1	MULTISPECIES: rhodanese-related sulfurtransferase [Pseudomonas]	28	8	14	8	35.4	328	8	0	Yes	1.05463	0.798255		1.29137	0.159005		9.25732	0.000104551	Up	-1.14489	0.442896		PA0858		conserved hypothetical protein	PA0858	-1.26661	0.0113172	S	F:GO:0016740	F:transferase activity	EC:2	Transferases	G3DSA:3.30.70.100 (GENE3D); IPR036873 (G3DSA:3.40.250.GENE3D); IPR001763 (PFAM); IPR040503 (PFAM); mobidb-lite (MOBIDB_LITE); mobidb-lite (MOBIDB_LITE); IPR020936 (PANTHER); IPR020936 (HAMAP); IPR001763 (PROSITE_PROFILES); cd01518 (CDD); IPR036873 (SUPERFAMILY)	no GO terms	no GO terms
WP_034065898.1	phosphohydrolase [Pseudomonas aeruginosa]	10	2	5	2	20.6	66	2	0	Yes	1.27805	0.132015		1.41902	0.0671795		9.25561	0.000131997	Up										S	P:GO:0016311; F:GO:0002953; F:GO:0050897	P:dephosphorylation; F:5'-deoxynucleotidase activity; F:cobalt ion binding	EC:3.1.3	Acting on ester bonds	G3DSA:1.10.3210.10 (GENE3D); SSF109604 (SUPERFAMILY)	no GO terms	no GO terms
WP_003089203.1	MULTISPECIES: hypothetical protein [Pseudomonas]	10	6	8	6	78.8	217	6	0	Yes	1.3841	0.395179		1.08582	0.813948		9.14178	5.98575e-05	Up										S	P:GO:0008150; F:GO:0003674; C:GO:0005575	P:biological_process; F:molecular_function; C:cellular_component			Coil (COILS); Coil (COILS)	no GO terms	no GO terms
WP_003084454.1	MULTISPECIES: hypothetical protein [Pseudomonas]	24	3	9	3	15.7	185	3	0	Yes	-1.14303	0.677672		1.04242	0.794592		8.87772	0.000651629	Up															PS51257 (PROSITE_PROFILES)	no GO terms	no GO terms
WP_003094139.1	MULTISPECIES: penicillin-binding protein 2 [Pseudomonas]	4	2	3	2	62.8	127	2	0	Yes	-1.40031	0.348144		1.60314	0.137771		8.72085	0.00241473	Up	-1.77466	0.157538		PA4418	ftsI	penicillin-binding protein 3	ftsI	1.21109	0.00885053	M	P:GO:0000917; P:GO:0006508; P:GO:0008360; P:GO:0043093; P:GO:0071555; F:GO:0008658; F:GO:0008955; F:GO:0009002; C:GO:0005887	P:division septum assembly; P:proteolysis; P:regulation of cell shape; P:FtsZ-dependent cytokinesis; P:cell wall organization; F:penicillin binding; F:peptidoglycan glycosyltransferase activity; F:serine-type D-Ala-D-Ala carboxypeptidase activity; C:integral component of plasma membrane	EC:3.4.21; EC:2.4.1.129; EC:3.4.16.4	Acting on peptide bonds (peptidases); Peptidoglycan glycosyltransferase; Serine-type D-Ala-D-Ala carboxypeptidase	IPR001460 (PFAM); IPR005311 (PFAM); G3DSA:3.30.450.330 (GENE3D); G3DSA:3.90.1310.10 (GENE3D); IPR012338 (G3DSA:3.40.710.GENE3D); mobidb-lite (MOBIDB_LITE); PTHR30627:SF1 (PANTHER); PTHR30627 (PANTHER); IPR037532 (HAMAP); IPR012338 (SUPERFAMILY); IPR036138 (SUPERFAMILY)	P:GO:0009252; P:GO:0051301; F:GO:0008658; F:GO:0008955; C:GO:0005887	P:peptidoglycan biosynthetic process; P:cell division; F:penicillin binding; F:peptidoglycan glycosyltransferase activity; C:integral component of plasma membrane
WP_003092461.1	MULTISPECIES: DUF4197 domain-containing protein [Pseudomonas]	54	9	23	9	23.6	896	9	0	Yes	1.48521	0.00791687		-1.68536	0.0100626	Down	8.36784	5.8034e-06	Up	-3.53235	0.0005376	Lower	PA3675		hypothetical protein	PA3675	-1.32577	0.000227763	S					IPR025245 (PFAM)	no GO terms	no GO terms
WP_019726837.1	pyocin S5 [Pseudomonas aeruginosa]	20	8	16	8	44.6	358	8	0	Yes	1.4415	0.000933317		1.17674	0.0311587		8.26299	1.64413e-07	Up										S	P:GO:0019835; P:GO:0050829; C:GO:0016021	P:cytolysis; P:defense response to Gram-negative bacterium; C:integral component of membrane			Coil (COILS); Coil (COILS); Coil (COILS); IPR000293 (PRINTS); IPR038283 (G3DSA:1.10.490.GENE3D); IPR000293 (PFAM); IPR000293 (PROSITE_PATTERNS); SSF56837 (SUPERFAMILY)	P:GO:0019835; P:GO:0050829; C:GO:0016021	P:cytolysis; P:defense response to Gram-negative bacterium; C:integral component of membrane
WP_034065694.1	phage late control D family protein [Pseudomonas aeruginosa]	9	3	4	3	35.9	139	3	0	Yes	-1.07773	0.936668		1.00512	0.834495		8.08097	0.00854542	Up				PA0628		conserved hypothetical protein	PA0628	-5.79409	1.07e-31	S					G3DSA:2.30.300.10 (GENE3D); IPR023399 (G3DSA:3.30.1920.GENE3D); PF05954 (PFAM); G3DSA:3.55.50.10 (GENE3D); PTHR35862:SF3 (PANTHER); PTHR35862 (PANTHER); SSF69279 (SUPERFAMILY)	no GO terms	no GO terms
WP_003085175.1	MULTISPECIES: phage major tail tube protein [Pseudomonas]	33	4	12	4	17.9	429	4	0	Yes	1.01677	0.629345		1.03977	0.51686		7.76713	2.05359e-05	Up	-1.08912	0.801181		PA0623		probable bacteriophage protein	PA0623	-2.60369	2.92e-09	S					IPR006498 (PFAM); IPR006498 (TIGRFAM); IPR006498 (PTHR35861:PANTHER); PTHR35861 (PANTHER)	no GO terms	no GO terms
WP_003095846.1	MULTISPECIES: 50S ribosomal protein L31 [Pseudomonas]	21	2	6	2	7.9	155	2	0	Yes	1.10898	0.586806		1.04544	0.66001		7.75803	0.000451187	Up	-1.1485	0.428924		PA5049	rpmE	50S ribosomal protein L31	rpmE	1.45373	0.0651572	J	P:GO:0006412; F:GO:0003735; F:GO:0008270; F:GO:0019843	P:translation; F:structural constituent of ribosome; F:zinc ion binding; F:rRNA binding			IPR002150 (PRINTS); IPR042105 (G3DSA:4.10.830.GENE3D); IPR002150 (PFAM); IPR002150 (TIGRFAM); PTHR33280:SF6 (PANTHER); IPR002150 (PANTHER); IPR002150 (PROSITE_PATTERNS); IPR027491 (HAMAP); IPR034704 (SUPERFAMILY)	P:GO:0006412; F:GO:0003735; C:GO:0005840	P:translation; F:structural constituent of ribosome; C:ribosome
WP_003119873.1	MULTISPECIES: DEAD/DEAH box helicase [Pseudomonas]	35	16	55	16	62.1	1502	16	0	Yes	1.08353	0.158417		-1.00973	0.869867		7.649	2.87804e-06	Up	-1.38635	0.00342121		PA2840		probable ATP-dependent RNA helicase	PA2840	-2.83643	8.2e-07	F	P:GO:0000027; P:GO:0009314; P:GO:0045727; P:GO:0048255; P:GO:0070417; F:GO:0003724; F:GO:0003725; F:GO:0005524; F:GO:0016887; F:GO:0033592; C:GO:0005618; C:GO:0005829; C:GO:0005840	P:ribosomal large subunit assembly; P:response to radiation; P:positive regulation of translation; P:mRNA stabilization; P:cellular response to cold; F:RNA helicase activity; F:double-stranded RNA binding; F:ATP binding; F:ATP hydrolysis activity; F:RNA strand annealing activity; C:cell wall; C:cytosol; C:ribosome	EC:3.6.1; EC:3.6.4.13	Acting on acid anhydrides; RNA helicase	IPR012677 (G3DSA:3.30.70.GENE3D); IPR005580 (PFAM); IPR001650 (PFAM); IPR027417 (G3DSA:3.40.50.GENE3D); IPR011545 (PFAM); IPR027417 (G3DSA:3.40.50.GENE3D); mobidb-lite (MOBIDB_LITE); mobidb-lite (MOBIDB_LITE); PTHR47963 (PANTHER); PTHR47963:SF5 (PANTHER); IPR000629 (PROSITE_PATTERNS); IPR001650 (PROSITE_PROFILES); IPR028618 (HAMAP); IPR014014 (PROSITE_PROFILES); IPR014001 (PROSITE_PROFILES); cd00…	P:GO:0000027; P:GO:0070417; F:GO:0003676; F:GO:0003724; F:GO:0005524	P:ribosomal large subunit assembly; P:cellular response to cold; F:nucleic acid binding; F:RNA helicase activity; F:ATP binding
WP_003089206.1	MULTISPECIES: DEAD/DEAH box helicase [Pseudomonas]	12	20	36	20	217.2	1074	20	0	Yes	1.27885	0.0170689		1.86709	3.2477e-05	Up	7.57893	5.83672e-08	Up										L	F:GO:0003676; F:GO:0004386; F:GO:0005524	F:nucleic acid binding; F:helicase activity; F:ATP binding			Coil (COILS); IPR027417 (G3DSA:3.40.50.GENE3D); IPR001650 (PFAM); IPR011545 (PFAM); IPR027417 (G3DSA:3.40.50.GENE3D); PTHR47962 (PANTHER); IPR014001 (PROSITE_PROFILES); IPR027417 (SUPERFAMILY); IPR027417 (SUPERFAMILY)	F:GO:0003676; F:GO:0005524	F:nucleic acid binding; F:ATP binding
WP_003094015.1	MULTISPECIES: c-type cytochrome [Pseudomonas]	6	3	4	3	50.7	111	3	0	Yes	-1.13689	0.931304		-1.72439	0.270052		7.52538	0.00296156	Up	-1.18143	0.574541		PA4371		hypothetical protein	PA4371	-1.01347	0.912014	C	P:GO:0022900; F:GO:0009055; F:GO:0020037; F:GO:0046872	P:electron transport chain; F:electron transfer activity; F:heme binding; F:metal ion binding	EC:1	Oxidoreductases	IPR010538 (PIRSF); IPR010538 (PFAM); IPR036909 (G3DSA:1.10.760.GENE3D); PTHR30600:SF4 (PANTHER); PTHR30600 (PANTHER); IPR009056 (PROSITE_PROFILES); IPR036909 (SUPERFAMILY)	F:GO:0009055; F:GO:0020037	F:electron transfer activity; F:heme binding
WP_003082462.1	MULTISPECIES: tRNA 2-thiocytidine(32) synthetase TtcA [Pseudomonas]	36	10	22	10	31.2	498	10	0	Yes	1.32263	0.00222134		1.01942	0.93022		7.35922	0.000215098	Up	-1.12173	0.882502		PA1192		conserved hypothetical protein	PA1192	-1.41064	0.00104243	J	P:GO:0034227; F:GO:0000049; F:GO:0000287; F:GO:0005524; F:GO:0016783; F:GO:0051539; C:GO:0005829	P:tRNA thio-modification; F:tRNA binding; F:magnesium ion binding; F:ATP binding; F:sulfurtransferase activity; F:4 iron, 4 sulfur cluster binding; C:cytosol	EC:2.8.1	Transferring sulfur-containing groups	IPR014729 (G3DSA:3.40.50.GENE3D); IPR011063 (PFAM); IPR035107 (PIRSF); PTHR43686:SF2 (PANTHER); PTHR43686 (PANTHER); IPR012089 (HAMAP); cd01993 (CDD); SSF52402 (SUPERFAMILY)	P:GO:0008033	P:tRNA processing
WP_003121370.1	MULTISPECIES: hypothetical protein [Pseudomonas]	27	5	10	5	29.1	281	5	0	Yes	1.35588	0.00173757		-1.59635	0.0698528		7.14048	4.93784e-06	Up	2.94334	0.0202698	Higher	PA5472		putative basic amino acid ABC transporter substrate-binding protein	PA5472	-1.23659	0.119245	ET					G3DSA:3.40.190.10 (GENE3D); G3DSA:3.40.190.10 (GENE3D); PTHR35936:SF5 (PANTHER); PTHR35936 (PANTHER); SSF53850 (SUPERFAMILY)	no GO terms	no GO terms
WP_003094760.1	MULTISPECIES: 50S ribosomal protein L27 [Pseudomonas]	47	5	24	5	9	383	5	0	Yes	1.41148	0.00415268		1.18354	0.133553		7.11965	0.000301298	Up	-1.76719	0.000440618	Lower	PA4567	rpmA	50S ribosomal protein L27	rpmA	1.43824	0.164767	J	P:GO:0000027; P:GO:0001558; P:GO:0006412; P:GO:0042256; P:GO:0090070; P:GO:1902626; F:GO:0003735; F:GO:0043022; C:GO:0005618; C:GO:0005886	P:ribosomal large subunit assembly; P:regulation of cell growth; P:translation; P:mature ribosome assembly; P:positive regulation of ribosome biogenesis; P:assembly of large subunit precursor of preribosome; F:structural constituent of ribosome; F:ribosome binding; C:cell wall; C:plasma membrane			IPR001684 (PRINTS); IPR001684 (PFAM); IPR001684 (TIGRFAM); G3DSA:2.40.50.100 (GENE3D); mobidb-lite (MOBIDB_LITE); IPR001684 (PANTHER); IPR018261 (PROSITE_PATTERNS); IPR001684 (HAMAP); SSF110324 (SUPERFAMILY)	P:GO:0006412; F:GO:0003735; C:GO:0005840	P:translation; F:structural constituent of ribosome; C:ribosome
WP_004365124.1	MULTISPECIES: host-nuclease inhibitor protein Gam [Pseudomonas]	26	4	6	4	19.2	150	4	0	Yes	1.16768	0.477096		1.08034	0.811294		7.1177	1.76413e-07	Up										S	P:GO:0042262; F:GO:0003690	P:DNA protection; F:double-stranded DNA binding			Coil (COILS); IPR009951 (PFAM); G3DSA:1.20.5.170 (GENE3D); SSF161266 (SUPERFAMILY)	P:GO:0042262; F:GO:0003690	P:DNA protection; F:double-stranded DNA binding
WP_003085173.1	MULTISPECIES: phage tail sheath family protein [Pseudomonas]	36	9	34	9	41.2	932	9	0	Yes	-1.05805	0.417195		1.17118	0.0770027		7.00972	4.46808e-07	Up	1.08556	0.0656483		PA0622		probable bacteriophage protein	PA0622	-2.62119	3.32e-13	S	C:GO:0005576	C:extracellular region			IPR035089 (PFAM); IPR020287 (PFAM); G3DSA:3.40.50.11780 (GENE3D); PTHR35861 (PANTHER)	no GO terms	no GO terms
WP_023098436.1	MULTISPECIES: phage tail length determinator protein [Pseudomonas]	11	5	8	5	77.6	302	5	0	Yes	1.46347	0.685673		-1.10374	0.486543		6.95852	3.99158e-05	Up				PA0625		hypothetical protein	PA0625	-4.63924	1.84e-21						mobidb-lite (MOBIDB_LITE); mobidb-lite (MOBIDB_LITE); mobidb-lite (MOBIDB_LITE); mobidb-lite (MOBIDB_LITE); PTHR21525 (PANTHER); PTHR21525:SF9 (PANTHER)	no GO terms	no GO terms
WP_003089278.1	MULTISPECIES: gluconate 2-dehydrogenase subunit 3 family protein [Pseudomonas]	18	3	5	3	26.3	129	3	0	Yes	-1.17542	0.700942		-1.12997	0.513349		6.76141	0.00435163	Up	-1.44297	0.771698		PA2264		conserved hypothetical protein	PA2264	-1.1243	0.419781	Q	F:GO:0033717	F:gluconate 2-dehydrogenase (acceptor) activity	EC:1.1.1; EC:1.1.99.3	Acting on the CH-OH group of donors; Gluconate 2-dehydrogenase (acceptor)	IPR027056 (PFAM)	no GO terms	no GO terms
WP_003121116.1	MULTISPECIES: DNA-binding transcriptional regulator Fis [Pseudomonas]	42	3	7	3	11.9	205	3	0	Yes	1.04037	0.789771		-1.30591	0.270177		6.75168	3.16409e-06	Up	1.29351	0.112288		PA4853	fis	DNA-binding protein Fis	fis	-1.35287	0.0352333	K	P:GO:0009314; P:GO:0010628; P:GO:0010629; P:GO:0032359; P:GO:0044403; P:GO:0045892; P:GO:0045893; P:GO:0045911; F:GO:0001046; F:GO:0001216; F:GO:0001217; F:GO:0042803; F:GO:0044374; C:GO:0000786; C:GO:0005829; C:GO:0031421	P:response to radiation; P:positive regulation of gene expression; P:negative regulation of gene expression; P:provirus excision; P:biological process involved in symbiotic interaction; P:negative regulation of transcription, DNA-templated; P:positive regulation of transcription, DNA-templated; P:positive regulation of DNA recombination; F:core promoter sequence-specific DNA binding; F:DNA-bindin…			IPR005412 (PRINTS); IPR002197 (PRINTS); IPR005412 (PIRSF); IPR002197 (PFAM); G3DSA:1.10.10.60 (GENE3D); mobidb-lite (MOBIDB_LITE); PTHR47918 (PANTHER); IPR009057 (SUPERFAMILY)	P:GO:0006355; F:GO:0003677; F:GO:0043565	P:regulation of transcription, DNA-templated; F:DNA binding; F:sequence-specific DNA binding
WP_003083559.1	MULTISPECIES: curli production assembly protein CsgG [Pseudomonas]	43	9	19	9	24.4	432	9	0	Yes	1.12562	0.469192		-1.14259	0.577568		6.58871	0.00105299	Up	1.63809	0.0932559		PA0045		hypothetical protein	PA0045	1.75653	0.000438368	M	P:GO:0015031; C:GO:0030288	P:protein transport; C:outer membrane-bounded periplasmic space			IPR005534 (PFAM); G3DSA:3.40.50.10610 (GENE3D); PTHR41164 (PANTHER); PS51257 (PROSITE_PROFILES); SSF52964 (SUPERFAMILY)	C:GO:0030288	C:outer membrane-bounded periplasmic space
WP_003086547.1	MULTISPECIES: ribonucleotide-diphosphate reductase subunit beta [Pseudomonas]	27	8	32	8	47.4	1270	8	0	Yes	-1.06118	0.0288518		1.15443	0.0104356		6.52505	8.98799e-10	Up	-1.03775	0.172627		PA1155	nrdB	NrdB, tyrosyl radical-harboring component of class Ia ribonucleotide reductase	nrdB	1.77225	0.0269187	F	P:GO:0006260; P:GO:0009263; F:GO:0004748; F:GO:0046872; C:GO:0016021	P:DNA replication; P:deoxyribonucleotide biosynthetic process; F:ribonucleoside-diphosphate reductase activity, thioredoxin disulfide as acceptor; F:metal ion binding; C:integral component of membrane	EC:1.17.4.1	Ribonucleoside-diphosphate reductase	IPR000358 (PIRSF); IPR012348 (G3DSA:1.10.620.GENE3D); IPR000358 (PFAM); mobidb-lite (MOBIDB_LITE); mobidb-lite (MOBIDB_LITE); mobidb-lite (MOBIDB_LITE); IPR000358 (PANTHER); PTHR23409:SF18 (PANTHER); IPR033909 (CDD); IPR009078 (SUPERFAMILY)	P:GO:0009263; F:GO:0016491	P:deoxyribonucleotide biosynthetic process; F:oxidoreductase activity
WP_014603666.1	MULTISPECIES: pyocin killing protein [Pseudomonas]	27	17	30	17	81.2	1167	17	0	Yes	1.28593	0.0128857		1.20993	0.0317999		6.50384	3.06584e-07	Up										S	P:GO:0009617; P:GO:0019835; P:GO:0090305; F:GO:0004519; F:GO:0005102	P:response to bacterium; P:cytolysis; P:nucleic acid phosphodiester bond hydrolysis; F:endonuclease activity; F:signaling receptor binding	EC:3.1	Acting on ester bonds	Coil (COILS); Coil (COILS); Coil (COILS); IPR003060 (PRINTS); IPR016128 (PFAM); mobidb-lite (MOBIDB_LITE); mobidb-lite (MOBIDB_LITE); mobidb-lite (MOBIDB_LITE); IPR036302 (SUPERFAMILY)	P:GO:0009617; P:GO:0019835; F:GO:0004519; F:GO:0005102	P:response to bacterium; P:cytolysis; F:endonuclease activity; F:signaling receptor binding
WP_003089801.1	MULTISPECIES: c-type cytochrome [Pseudomonas]	15	4	6	4	31.3	174	4	0	Yes	1.61662	0.298818		-1.01031	0.668831		6.46064	0.0553119		-8.25802	0.0435611	Lower	PA2481		hypothetical protein	PA2481	-1.72538	0.0511108	C	P:GO:0022900; F:GO:0009055; F:GO:0020037; F:GO:0046872; F:GO:0050338; C:GO:0009512	P:electron transport chain; F:electron transfer activity; F:heme binding; F:metal ion binding; F:thiosulfate dehydrogenase activity; C:cytochrome b6f complex	EC:1.8.2.2	Thiosulfate dehydrogenase	IPR036909 (G3DSA:1.10.760.GENE3D); IPR036909 (G3DSA:1.10.760.GENE3D); IPR009056 (PFAM); PTHR35008 (PANTHER); PTHR35008:SF4 (PANTHER); IPR009056 (PROSITE_PROFILES); IPR036909 (SUPERFAMILY); IPR036909 (SUPERFAMILY)	F:GO:0009055; F:GO:0020037	F:electron transfer activity; F:heme binding
WP_003088030.1	MULTISPECIES: hypothetical protein [Pseudomonas]	34	5	9	5	18.8	202	5	0	Yes	2.56282	1.72639e-05	Up	1.09635	0.38277		6.4444	3.43262e-06	Up				PA1845	tsi1	Tsi1	PA1845	2.6295	1.23e-15						G3DSA:2.40.128.650 (GENE3D)	no GO terms	no GO terms
WP_003085168.1	MULTISPECIES: hypothetical protein [Pseudomonas]	16	9	17	9	73.3	605	9	0	Yes	1.02023	0.943683		1.07748	0.50756		6.19313	0.000110075	Up										S					IPR022225 (PFAM); G3DSA:2.60.40.3940 (GENE3D); PTHR35191 (PANTHER)	no GO terms	no GO terms
WP_003093711.1	MULTISPECIES: 50S ribosomal protein L24 [Pseudomonas]	61	5	33	5	11.5	1187	5	0	Yes	1.35193	0.017304		-1.53753	0.00445686	Down	6.18689	5.23722e-05	Up	-1.14086	0.208068		PA4252	rplX	50S ribosomal protein L24	rplX	2.98512	0.00395566	J	P:GO:0000027; P:GO:0006412; F:GO:0003735; F:GO:0019843; C:GO:0005618	P:ribosomal large subunit assembly; P:translation; F:structural constituent of ribosome; F:rRNA binding; C:cell wall			IPR003256 (PFAM); IPR005824 (PFAM); IPR003256 (TIGRFAM); IPR014722 (G3DSA:2.30.30.GENE3D); IPR003256 (PANTHER); IPR005825 (PROSITE_PATTERNS); IPR003256 (HAMAP); IPR041988 (CDD); IPR008991 (SUPERFAMILY)	P:GO:0006412; F:GO:0003723; F:GO:0003735; C:GO:0005840	P:translation; F:RNA binding; F:structural constituent of ribosome; C:ribosome
WP_003087592.1	MULTISPECIES: type VI secretion system contractile sheath small subunit [Pseudomonas]	36	5	7	5	18.1	182	5	0	Yes	-1.22606	0.105711		-1.48693	0.00964317		6.17768	5.76604e-06	Up	1.31608	0.00752817		PA1657	hsiB2	HsiB2	PA1657	1.69597	0.156842	S	P:GO:0033103	P:protein secretion by the type VI secretion system			IPR008312 (PFAM); IPR008312 (PIRSF); IPR008312 (TIGRFAM); IPR008312 (PANTHER); PTHR35850:SF2 (PANTHER)	no GO terms	no GO terms
WP_003111315.1	MULTISPECIES: ABC-F family ATPase [Pseudomonas]	19	9	24	9	58.7	607	9	0	Yes	1.28123	0.044327		1.17585	0.0516271		6.08514	9.15458e-06	Up										S	P:GO:0009409; F:GO:0005524; F:GO:0016887	P:response to cold; F:ATP binding; F:ATP hydrolysis activity	EC:3.6.1	Acting on acid anhydrides	Coil (COILS); IPR027417 (G3DSA:3.40.50.GENE3D); IPR003439 (PFAM); IPR027417 (G3DSA:3.40.50.GENE3D); IPR032781 (PFAM); IPR003439 (PFAM); PTHR19211 (PANTHER); PTHR19211:SF96 (PANTHER); IPR003439 (PROSITE_PROFILES); IPR003439 (PROSITE_PROFILES); cd03221 (CDD); cd03221 (CDD); IPR027417 (SUPERFAMILY); IPR027417 (SUPERFAMILY)	F:GO:0005524	F:ATP binding
WP_003084736.1	MULTISPECIES: cell envelope integrity protein CreD [Pseudomonas]	16	8	15	8	50.5	431	8	0	Yes	1.07143	0.394118		1.28746	0.0324351		6.02787	3.90994e-07	Up	1.46803	0.135803		PA0465	creD	inner membrane protein CreD	creD	2.63981	0.00037679	V	C:GO:0005886; C:GO:0016021	C:plasma membrane; C:integral component of membrane			IPR010364 (PFAM); IPR010364 (PIRSF); IPR010364 (PANTHER)	no GO terms	no GO terms
WP_003096241.1	MULTISPECIES: nitroreductase family protein [Pseudomonas]	24	4	9	4	22.5	226	4	0	Yes	1.08372	0.663039		1.46571	0.133496		5.97265	0.00026561	Up	2.15113	0.0468901	Higher	PA5190		NAD(P)H quinone oxidoreductase	PA5190	1.23053	0.103392	C	F:GO:0003955	F:NAD(P)H dehydrogenase (quinone) activity	EC:1.6.5.2	NAD(P)H dehydrogenase (quinone)	IPR029479 (PFAM); IPR000415 (G3DSA:3.40.109.GENE3D); PTHR43673 (PANTHER); PTHR43673:SF8 (PANTHER); cd02137 (CDD); IPR000415 (SUPERFAMILY)	F:GO:0016491	F:oxidoreductase activity
WP_003109989.1	MULTISPECIES: RNA-binding transcriptional accessory protein [Pseudomonas]	44	32	78	32	84.9	1980	32	0	Yes	1.21352	0.0376745		1.01127	0.826843		5.89431	4.38343e-07	Up	1.02587	0.756939		PA5201		conserved hypothetical protein	PA5201	-1.08449	0.33293	K	P:GO:0006139; P:GO:0010212; F:GO:0003676; C:GO:0005829	P:nucleobase-containing compound metabolic process; P:response to ionizing radiation; F:nucleic acid binding; C:cytosol			Coil (COILS); G3DSA:1.10.150.310 (GENE3D); IPR032639 (PFAM); IPR018974 (PFAM); IPR003029 (PFAM); IPR023323 (G3DSA:1.10.3500.GENE3D); G3DSA:2.40.50.140 (GENE3D); IPR041692 (PFAM); PF12836 (PFAM); IPR023319 (G3DSA:1.10.10.GENE3D); IPR037027 (G3DSA:3.30.420.GENE3D); mobidb-lite (MOBIDB_LITE); PTHR10724:SF10 (PANTHER); PTHR10724 (PANTHER); IPR003029 (PROSITE_PROFILES); IPR044146 (CDD); IPR010994 (SUP…	P:GO:0006139; F:GO:0003676	P:nucleobase-containing compound metabolic process; F:nucleic acid binding
WP_003093938.1	MULTISPECIES: fumarate hydratase [Pseudomonas]	30	13	55	13	54.7	1298	13	0	Yes	-1.02263	0.71734		1.10695	0.216154		5.74763	2.30025e-08	Up	-1.9568	0.000147453	Lower	PA4333		probable fumarase	PA4333	1.13463	0.444093	C	P:GO:0006091; F:GO:0004333; F:GO:0046872; F:GO:0051539	P:generation of precursor metabolites and energy; F:fumarate hydratase activity; F:metal ion binding; F:4 iron, 4 sulfur cluster binding	EC:4.2.1.2	Fumarate hydratase	IPR004646 (PFAM); IPR004647 (TIGRFAM); IPR011167 (PIRSF); IPR004646 (TIGRFAM); IPR004647 (PFAM); IPR036660 (G3DSA:3.20.130.GENE3D); PTHR30389:SF1 (PANTHER); PTHR30389 (PANTHER); IPR036660 (SUPERFAMILY)	P:GO:0006091; F:GO:0004333; F:GO:0016829; F:GO:0016836	P:generation of precursor metabolites and energy; F:fumarate hydratase activity; F:lyase activity; F:hydro-lyase activity
WP_003111134.1	MULTISPECIES: c-type cytochrome [Pseudomonas]	2	2	4	2	73.2	99	2	0	Yes	1.29499	0.028685		-3.15101	0.0010563	Down	5.7295	5.56156e-05	Up	7.85774	0.0262727	Higher	PA4571		probable cytochrome c	PA4571	1.6326	0.00225595	C	P:GO:0022900; F:GO:0009055; F:GO:0020037; F:GO:0046872; F:GO:0050338; C:GO:0042597	P:electron transport chain; F:electron transfer activity; F:heme binding; F:metal ion binding; F:thiosulfate dehydrogenase activity; C:periplasmic space	EC:1.8.2.2	Thiosulfate dehydrogenase	IPR036909 (G3DSA:1.10.760.GENE3D); IPR036909 (G3DSA:1.10.760.GENE3D); IPR036909 (G3DSA:1.10.760.GENE3D); IPR009056 (PFAM); IPR036909 (G3DSA:1.10.760.GENE3D); IPR009056 (PFAM); mobidb-lite (MOBIDB_LITE); mobidb-lite (MOBIDB_LITE); mobidb-lite (MOBIDB_LITE); PTHR35008:SF8 (PANTHER); PTHR35008 (PANTHER); PTHR35008 (PANTHER); PTHR35008:SF8 (PANTHER); IPR009056 (PROSITE_PROFILES); IPR009056 (PROSITE_P…	F:GO:0009055; F:GO:0020037	F:electron transfer activity; F:heme binding
WP_003093158.1	MULTISPECIES: tRNA (N6-isopentenyl adenosine(37)-C2)-methylthiotransferase MiaB [Pseudomonas]	17	6	11	6	49.9	367	6	0	Yes	-1.01112	0.924538		1.47801	0.00473236		5.71475	8.86783e-06	Up	-1.75614	0.00199971	Lower	PA3980		conserved hypothetical protein	PA3980	-1.80369	2.73e-05	J	P:GO:0030488; P:GO:0035600; F:GO:0035597; F:GO:0046872; F:GO:0051539; C:GO:0005829	P:tRNA methylation; P:tRNA methylthiolation; F:N6-isopentenyladenosine methylthiotransferase activity; F:metal ion binding; F:4 iron, 4 sulfur cluster binding; C:cytosol	EC:2.8.4	Transferring sulfur-containing groups	IPR038135 (G3DSA:3.40.50.GENE3D); IPR005839 (TIGRFAM); TIGR01574 (TIGRFAM); IPR013848 (PFAM); IPR023404 (G3DSA:3.80.30.GENE3D); IPR007197 (PFAM); IPR002792 (PFAM); IPR006463 (SFLD); IPR005839 (SFLD); SFLDG01082 (SFLD); PTHR43020 (PANTHER); IPR020612 (PROSITE_PATTERNS); IPR006463 (HAMAP); IPR007197 (PROSITE_PROFILES); IPR013848 (PROSITE_PROFILES); IPR002792 (PROSITE_PROFILES); cd01335 (CDD); SSF10…	P:GO:0006400; F:GO:0003824; F:GO:0016740; F:GO:0035596; F:GO:0051536; F:GO:0051539	P:tRNA modification; F:catalytic activity; F:transferase activity; F:methylthiotransferase activity; F:iron-sulfur cluster binding; F:4 iron, 4 sulfur cluster binding
WP_003095696.1	MULTISPECIES: phosphomethylpyrimidine synthase ThiC [Pseudomonas]	42	22	70	22	69.7	1854	22	0	Yes	1.25178	0.00251923		1.64693	4.35625e-05	Up	5.61912	3.0742e-08	Up	-1.02782	0.507519		PA4973	thiC	thiamin biosynthesis protein ThiC	thiC	-1.08865	0.220023	H	P:GO:0006805; P:GO:0009228; P:GO:0009229; F:GO:0008270; F:GO:0016830; F:GO:0051539; C:GO:0005829	P:xenobiotic metabolic process; P:thiamine biosynthetic process; P:thiamine diphosphate biosynthetic process; F:zinc ion binding; F:carbon-carbon lyase activity; F:4 iron, 4 sulfur cluster binding; C:cytosol	EC:4.1	Carbon-carbon lyases	IPR038521 (G3DSA:3.20.20.GENE3D); IPR002817 (TIGRFAM); IPR002817 (PFAM); IPR025747 (PFAM); G3DSA:6.10.250.620 (GENE3D); SFLDG01114 (SFLD); IPR002817 (SFLD); SFLDS00113 (SFLD); mobidb-lite (MOBIDB_LITE); mobidb-lite (MOBIDB_LITE); IPR002817 (PANTHER); PTHR30557:SF1 (PANTHER); IPR037509 (HAMAP)	P:GO:0009228; F:GO:0016830; F:GO:0051536	P:thiamine biosynthetic process; F:carbon-carbon lyase activity; F:iron-sulfur cluster binding
WP_003093157.1	MULTISPECIES: DUF1820 family protein [Bacteria]	37	3	8	3	12.6	228	3	0	Yes	1.19261	0.140155		1.13438	0.448768		5.56719	1.16111e-05	Up	1.09908	0.438122		PA3979		hypothetical protein	PA3979	-2.03985	3.5e-08	S					IPR014949 (PIRSF); IPR014949 (PFAM)	no GO terms	no GO terms
WP_003093695.1	MULTISPECIES: 50S ribosomal protein L15 [Pseudomonas]	53	8	67	8	15.2	2008	8	0	Yes	1.2173	0.13235		-1.71799	0.0072545	Down	5.53778	8.76001e-05	Up	-1.3752	0.037879		PA4244	rplO	50S ribosomal protein L15	rplO	1.68356	0.116082	J	P:GO:0006412; F:GO:0003735; F:GO:0019843; C:GO:0005886	P:translation; F:structural constituent of ribosome; F:rRNA binding; C:plasma membrane			IPR005749 (TIGRFAM); G3DSA:3.100.10.10 (GENE3D); IPR021131 (PFAM); mobidb-lite (MOBIDB_LITE); IPR005749 (PANTHER); PTHR12934:SF11 (PANTHER); IPR001196 (PROSITE_PATTERNS); IPR030878 (HAMAP); IPR036227 (SUPERFAMILY)	P:GO:0006412; F:GO:0003735; C:GO:0005840; C:GO:0015934	P:translation; F:structural constituent of ribosome; C:ribosome; C:large ribosomal subunit
WP_003097074.1	MULTISPECIES: MFS transporter [Pseudomonas]	4	2	6	2	47.7	159	2	0	Yes	1.03567	0.607173		-1.0588	0.530254		5.53409	1.32911e-05	Up	2.57558	7.42324e-05	Higher	PA5530		C5-dicarboxylate transporter	PA5530	-1.20773	0.576758	EGP	P:GO:0006835; P:GO:0055085; F:GO:0022857; C:GO:0016021	P:dicarboxylic acid transport; P:transmembrane transport; F:transmembrane transporter activity; C:integral component of membrane	EC:7	Translocases	IPR004736 (TIGRFAM); IPR036259 (G3DSA:1.20.1250.GENE3D); IPR036259 (G3DSA:1.20.1250.GENE3D); IPR011701 (PFAM); PTHR43528:SF5 (PANTHER); PTHR43528 (PANTHER); IPR005829 (PROSITE_PATTERNS); IPR005829 (PROSITE_PATTERNS); IPR020846 (PROSITE_PROFILES); cd17367 (CDD); IPR036259 (SUPERFAMILY)	P:GO:0055085; F:GO:0022857; C:GO:0016021	P:transmembrane transport; F:transmembrane transporter activity; C:integral component of membrane
WP_034085349.1	hypothetical protein [Pseudomonas aeruginosa]	6	2	5	2	39.2	104	2	0	Yes	1.23569	0.00645864		-1.76739	5.02659e-05	Down	5.52137	1.16707e-05	Up															Coil (COILS); Coil (COILS); Coil (COILS); mobidb-lite (MOBIDB_LITE); mobidb-lite (MOBIDB_LITE); mobidb-lite (MOBIDB_LITE); mobidb-lite (MOBIDB_LITE); mobidb-lite (MOBIDB_LITE); mobidb-lite (MOBIDB_LITE); mobidb-lite (MOBIDB_LITE)	no GO terms	no GO terms
WP_003094894.1	MULTISPECIES: DctP family TRAP transporter solute-binding subunit [Pseudomonas]	9	3	4	3	37	172	3	0	Yes	1.44519	0.0301255		-1.14461	0.367928		5.36029	7.4306e-05	Up	-5.54947	1.89847e-05	Lower	PA4616		probable c4-dicarboxylate-binding protein	PA4616	-1.36769	0.0799573	G	P:GO:0055085; C:GO:0030288	P:transmembrane transport; C:outer membrane-bounded periplasmic space			IPR004682 (PIRSF); IPR038404 (G3DSA:3.40.190.GENE3D); IPR018389 (PFAM); IPR004682 (TIGRFAM); IPR018389 (PANTHER); PTHR33376:SF7 (PANTHER)	P:GO:0055085; C:GO:0030288	P:transmembrane transport; C:outer membrane-bounded periplasmic space
WP_003092958.1	MULTISPECIES: nitrate reductase subunit beta [Pseudomonas]	13	7	14	7	58.1	306	7	0	Yes	-1.06513	0.67492		-1.5027	0.052348	Down	5.27698	0.000471312	Up	1.07544	0.633603		PA3874	narH	respiratory nitrate reductase beta chain	narH	1.24315	0.0779004	C	P:GO:0009061; P:GO:0022900; P:GO:0042126; F:GO:0008940; F:GO:0009055; C:GO:0009325; C:GO:0016020	P:anaerobic respiration; P:electron transport chain; P:nitrate metabolic process; F:nitrate reductase activity; F:electron transfer activity; C:nitrate reductase complex; C:membrane	EC:1.7.99.4	Nitrate reductase	IPR017896 (PFAM); G3DSA:3.30.70.20 (GENE3D); G3DSA:3.30.70.20 (GENE3D); G3DSA:3.30.70.20 (GENE3D); IPR029263 (PFAM); IPR006547 (TIGRFAM); IPR038262 (G3DSA:1.10.3650.GENE3D); PTHR43518 (PANTHER); PTHR43518:SF3 (PANTHER); IPR017896 (PROSITE_PROFILES); IPR017896 (PROSITE_PROFILES); IPR017896 (PROSITE_PROFILES); IPR006547 (CDD); SSF54862 (SUPERFAMILY)	P:GO:0042126; F:GO:0008940; C:GO:0009325	P:nitrate metabolic process; F:nitrate reductase activity; C:nitrate reductase complex
WP_003085824.1	MULTISPECIES: NADH:flavin oxidoreductase [Pseudomonas]	38	13	27	13	40.3	750	13	0	Yes	1.06889	0.144587		1.24222	0.00344276		5.21333	2.05966e-06	Up	1.37335	0.00145761		PA0840		probable oxidoreductase	PA0840	1.09824	0.53906	C	F:GO:0010181; F:GO:0016491; C:GO:0005829	F:FMN binding; F:oxidoreductase activity; C:cytosol	EC:1	Oxidoreductases	IPR001155 (PFAM); IPR013785 (G3DSA:3.20.20.GENE3D); PTHR22893:SF91 (PANTHER); IPR045247 (PANTHER); cd04747 (CDD); SSF51395 (SUPERFAMILY)	F:GO:0003824; F:GO:0010181; F:GO:0016491	F:catalytic activity; F:FMN binding; F:oxidoreductase activity
WP_003093672.1	MULTISPECIES: 50S ribosomal protein L17 [Pseudomonas]	39	4	53	4	14.5	1506	4	0	Yes	1.18858	0.0780129		-1.13149	0.237465		5.04536	2.91547e-05	Up	-1.0948	0.287011		PA4237	rplQ	50S ribosomal protein L17	rplQ	2.04347	0.0149638	J	P:GO:0000027; P:GO:0006412; F:GO:0003735	P:ribosomal large subunit assembly; P:translation; F:structural constituent of ribosome			IPR000456 (PFAM); IPR000456 (TIGRFAM); IPR036373 (G3DSA:3.90.1030.GENE3D); IPR000456 (PANTHER); PTHR14413:SF16 (PANTHER); IPR000456 (PROSITE_PATTERNS); IPR000456 (HAMAP); IPR036373 (SUPERFAMILY)	P:GO:0006412; F:GO:0003735; C:GO:0005840	P:translation; F:structural constituent of ribosome; C:ribosome
WP_003092960.1	MULTISPECIES: nitrate reductase subunit alpha [Pseudomonas]	12	11	16	11	140.9	494	11	0	Yes	1.08562	0.351777		-1.08752	0.352879		4.99658	3.40109e-06	Up	1.1798	0.227832		PA3875	narG	respiratory nitrate reductase alpha chain	narG	1.26363	0.0307876	C	P:GO:0009061; P:GO:0042126; F:GO:0008940; F:GO:0043546; F:GO:0046872; F:GO:0051539; C:GO:0009325; C:GO:0016020	P:anaerobic respiration; P:nitrate metabolic process; F:nitrate reductase activity; F:molybdopterin cofactor binding; F:metal ion binding; F:4 iron, 4 sulfur cluster binding; C:nitrate reductase complex; C:membrane	EC:1.7.99.4	Nitrate reductase	Coil (COILS); G3DSA:3.40.50.12440 (GENE3D); IPR028189 (PFAM); IPR006657 (PFAM); IPR006468 (TIGRFAM); IPR044906 (G3DSA:4.10.1200.GENE3D); IPR006656 (PFAM); PTHR43105 (PANTHER); PTHR43105:SF8 (PANTHER); IPR006655 (PROSITE_PATTERNS); IPR027467 (PROSITE_PATTERNS); IPR006655 (PROSITE_PATTERNS); IPR006963 (PROSITE_PROFILES); cd02750 (CDD); IPR037943 (CDD); SSF53706 (SUPERFAMILY); IPR009010 (SUPERFAMILY)	P:GO:0042126; F:GO:0008940; F:GO:0016491; F:GO:0043546; F:GO:0051539; C:GO:0009325	P:nitrate metabolic process; F:nitrate reductase activity; F:oxidoreductase activity; F:molybdopterin cofactor binding; F:4 iron, 4 sulfur cluster binding; C:nitrate reductase complex
WP_003093980.1	MULTISPECIES: alkene reductase [Pseudomonas]	38	10	27	10	37.8	725	10	0	Yes	1.21513	0.222979		-1.05477	0.701622		4.99159	3.49444e-05	Up	-1.73244	0.00729916	Lower	PA4356	xenB	xenobiotic reductase	xenB	1.38553	0.0397902	C	F:GO:0010181; F:GO:0016491	F:FMN binding; F:oxidoreductase activity	EC:1	Oxidoreductases	IPR001155 (PFAM); IPR013785 (G3DSA:3.20.20.GENE3D); IPR045247 (PANTHER); PTHR22893:SF98 (PANTHER); cd02933 (CDD); SSF51395 (SUPERFAMILY)	F:GO:0003824; F:GO:0010181; F:GO:0016491	F:catalytic activity; F:FMN binding; F:oxidoreductase activity
WP_003087267.1	MULTISPECIES: oxygen-independent coproporphyrinogen III oxidase [Pseudomonas]	17	8	14	8	52.5	284	8	0	Yes	1.15872	0.44586		-1.2739	0.219097		4.9484	0.000205924	Up	-1.83737	0.00568689	Lower	PA1546	hemN	oxygen-independent coproporphyrinogen III oxidase	hemN	1.04077	0.848523	H	P:GO:0006782; F:GO:0004109; F:GO:0046872; F:GO:0051539; F:GO:0051989; C:GO:0005737	P:protoporphyrinogen IX biosynthetic process; F:coproporphyrinogen oxidase activity; F:metal ion binding; F:4 iron, 4 sulfur cluster binding; F:coproporphyrinogen dehydrogenase activity; C:cytoplasm	EC:1.3.98.3; EC:1.3.3.3	Coproporphyrinogen dehydrogenase; Coproporphyrinogen oxidase	G3DSA:1.10.10.920 (GENE3D); IPR004558 (PIRSF); IPR004558 (TIGRFAM); IPR007197 (PFAM); IPR023404 (G3DSA:3.80.30.GENE3D); IPR010723 (PFAM); IPR004558 (SFLD); SFLDG01082 (SFLD); SFLDG01065 (SFLD); IPR034505 (PANTHER); PTHR13932:SF6 (PANTHER); IPR007197 (PROSITE_PROFILES); cd01335 (CDD); SSF102114 (SUPERFAMILY)	P:GO:0006779; F:GO:0003824; F:GO:0004109; F:GO:0051536; C:GO:0005737	P:porphyrin-containing compound biosynthetic process; F:catalytic activity; F:coproporphyrinogen oxidase activity; F:iron-sulfur cluster binding; C:cytoplasm
WP_003158636.1	MULTISPECIES: hypothetical protein [Proteobacteria]	7	3	4	3	50.4	82	3	0	Yes	1.38361	0.455128		2.0797	0.0324256	Up	4.89199	0.0018063	Up															no IPS match	no IPS match	no IPS match
WP_003103877.1	MULTISPECIES: 50S ribosomal protein L3 [Pseudomonas]	55	11	91	11	22.6	2355	11	0	Yes	1.0668	0.306144		1.06799	0.308072		4.83181	4.42896e-06	Up	-1.23777	0.0175368		PA4263	rplC	50S ribosomal protein L3	rplC	1.67542	0.0688988	J	P:GO:0000027; P:GO:0006412; P:GO:0010628; P:GO:0090070; P:GO:2000234; F:GO:0003735; F:GO:0019843; C:GO:0005886	P:ribosomal large subunit assembly; P:translation; P:positive regulation of gene expression; P:positive regulation of ribosome biogenesis; P:positive regulation of rRNA processing; F:structural constituent of ribosome; F:rRNA binding; C:plasma membrane			IPR000597 (PFAM); IPR019927 (TIGRFAM); G3DSA:3.30.160.810 (GENE3D); G3DSA:2.40.30.10 (GENE3D); PTHR11229:SF16 (PANTHER); IPR019927 (PANTHER); IPR019926 (PROSITE_PATTERNS); IPR019927 (HAMAP); IPR009000 (SUPERFAMILY)	P:GO:0006412; F:GO:0003735; C:GO:0005840	P:translation; F:structural constituent of ribosome; C:ribosome
WP_003091143.1	MULTISPECIES: 50S ribosomal protein L32 [Pseudomonas]	37	2	9	2	6.8	180	2	0	Yes	1.09642	0.566653		-1.46519	0.16469		4.80923	0.000782023	Up	-1.77135	0.0531059	Lower	PA2970	rpmF	50S ribosomal protein L32	rpmF	1.57122	0.0534868	J	P:GO:0000027; P:GO:0000302; P:GO:0006412; P:GO:0009314; F:GO:0003735	P:ribosomal large subunit assembly; P:response to reactive oxygen species; P:translation; P:response to radiation; F:structural constituent of ribosome			IPR002677 (PFAM); IPR002677 (TIGRFAM); mobidb-lite (MOBIDB_LITE); mobidb-lite (MOBIDB_LITE); mobidb-lite (MOBIDB_LITE); IPR044957 (PANTHER); IPR002677 (HAMAP); IPR011332 (SUPERFAMILY)	P:GO:0006412; F:GO:0003735; C:GO:0015934	P:translation; F:structural constituent of ribosome; C:large ribosomal subunit
WP_003095634.1	MULTISPECIES: 30S ribosomal protein S18 [Pseudomonas]	46	4	36	4	8.9	746	4	0	Yes	1.12174	0.130437		-1.06601	0.483997		4.76917	8.22805e-07	Up	-1.44777	0.00410468		PA4934	rpsR	30S ribosomal protein S18	rpsR	1.81936	0.0589571	J	P:GO:0006412; F:GO:0003735; F:GO:0048027; F:GO:0070181	P:translation; F:structural constituent of ribosome; F:mRNA 5'-UTR binding; F:small ribosomal subunit rRNA binding			IPR001648 (PRINTS); IPR001648 (PFAM); IPR001648 (TIGRFAM); IPR036870 (G3DSA:4.10.640.GENE3D); PTHR13479:SF40 (PANTHER); IPR001648 (PANTHER); IPR018275 (PROSITE_PATTERNS); IPR001648 (HAMAP); IPR036870 (SUPERFAMILY)	P:GO:0006412; F:GO:0003735; C:GO:0005840	P:translation; F:structural constituent of ribosome; C:ribosome
WP_045434856.1	filamentous hemagglutinin N-terminal domain-containing protein [Pseudomonas aeruginosa]	14	47	64	22	578	2001	47	19	Yes	1.16039	0.0104969		1.09348	0.103129		4.75353	1.60133e-07	Up										U					IPR010069 (TIGRFAM); IPR008638 (PFAM); IPR008619 (PFAM); IPR025157 (PFAM); IPR008638 (TIGRFAM); IPR012334 (G3DSA:2.160.20.GENE3D); mobidb-lite (MOBIDB_LITE); mobidb-lite (MOBIDB_LITE); PTHR23202 (PANTHER); IPR016117 (SUPERFAMILY); IPR011050 (SUPERFAMILY)	no GO terms	no GO terms
WP_003092809.1	MULTISPECIES: 23S rRNA (adenine(2503)-C(2))-methyltransferase RlmN [Pseudomonas]	17	6	16	6	41.7	389	6	0	Yes	1.20897	0.0166685		1.6696	0.000170841	Up	4.74307	4.57655e-06	Up	-1.21249	0.0565647		PA3806		conserved hypothetical protein	PA3806	-1.18147	0.208288	J	P:GO:0030488; P:GO:0070475; F:GO:0000049; F:GO:0002935; F:GO:0019843; F:GO:0046872; F:GO:0051539; F:GO:0070040; C:GO:0005829	P:tRNA methylation; P:rRNA base methylation; F:tRNA binding; F:tRNA (adenine-C2-)-methyltransferase activity; F:rRNA binding; F:metal ion binding; F:4 iron, 4 sulfur cluster binding; F:rRNA (adenine-C2-)-methyltransferase activity; C:cytosol	EC:2.1.1.192	23S rRNA (adenine(2503)-C(2))-methyltransferase	IPR007197 (PFAM); IPR027492 (TIGRFAM); G3DSA:1.10.150.530 (GENE3D); IPR004383 (PIRSF); IPR013785 (G3DSA:3.20.20.GENE3D); IPR007197 (SFLD); IPR004383 (SFLD); IPR040072 (PANTHER); PTHR30544:SF5 (PANTHER); IPR007197 (PROSITE_PROFILES); IPR027492 (HAMAP); cd01335 (CDD); SSF102114 (SUPERFAMILY)	P:GO:0006364; P:GO:0030488; P:GO:0070475; F:GO:0003824; F:GO:0008173; F:GO:0051536	P:rRNA processing; P:tRNA methylation; P:rRNA base methylation; F:catalytic activity; F:RNA methyltransferase activity; F:iron-sulfur cluster binding
WP_003093736.1	MULTISPECIES: 50S ribosomal protein L23 [Pseudomonas]	60	6	53	6	10.9	1250	6	0	Yes	1.11323	0.0755242		-1.04969	0.429887		4.69595	3.20611e-07	Up	-1.29771	0.0111481		PA4261	rplW	50S ribosomal protein L23	rplW	2.29487	0.00606846	J	P:GO:0000027; P:GO:0006412; F:GO:0003735; F:GO:0019843; C:GO:0005886	P:ribosomal large subunit assembly; P:translation; F:structural constituent of ribosome; F:rRNA binding; C:plasma membrane			IPR013025 (PFAM); IPR012677 (G3DSA:3.30.70.GENE3D); IPR013025 (PANTHER); PTHR11620:SF2 (PANTHER); IPR013025 (HAMAP); IPR012678 (SUPERFAMILY)	P:GO:0006412; F:GO:0003735; C:GO:0005840	P:translation; F:structural constituent of ribosome; C:ribosome
WP_003085613.1	MULTISPECIES: amino acid permease [Pseudomonas]	9	5	13	5	51.3	271	5	0	Yes	1.01721	0.911784		1.50273	0.00213318	Up	4.69324	1.48958e-06	Up	-1.80151	0.00100287	Lower	PA0789		probable amino acid permease	PA0789	1.40073	0.260415	E	P:GO:0006865; P:GO:0055085; F:GO:0022857; C:GO:0016021	P:amino acid transport; P:transmembrane transport; F:transmembrane transporter activity; C:integral component of membrane	EC:7	Translocases	G3DSA:1.20.1740.10 (GENE3D); PIRSF006060 (PIRSF); IPR004841 (PFAM); PTHR43341 (PANTHER); PTHR43341:SF2 (PANTHER); IPR004840 (PROSITE_PATTERNS)	P:GO:0006865; P:GO:0055085; C:GO:0016020; C:GO:0016021	P:amino acid transport; P:transmembrane transport; C:membrane; C:integral component of membrane
WP_124082625.1	hypothetical protein [Pseudomonas aeruginosa]	13	2	4	2	16.2	159	2	0	Yes	1.12191	0.309626		1.27728	0.0262437		4.68366	4.28543e-06	Up															no IPS match	no IPS match	no IPS match
WP_003107929.1	MULTISPECIES: precorrin-8X methylmutase [Pseudomonas]	26	6	12	6	21.6	225	6	0	Yes	1.17586	0.0037697		1.17101	0.0727239		4.60582	7.11404e-08	Up	-1.19102	0.0201646		PA2905	cobH	precorrin isomerase CobH	cobH	-1.01614	0.917871	H	P:GO:0009236; F:GO:0016993	P:cobalamin biosynthetic process; F:precorrin-8X methylmutase activity	EC:5.4.99.61; EC:5.4.1	Precorrin-8X methylmutase; Intramolecular transferases	IPR036588 (G3DSA:3.40.50.GENE3D); IPR003722 (PFAM); PTHR43588 (PANTHER); IPR036588 (SUPERFAMILY)	P:GO:0009236; F:GO:0016993	P:cobalamin biosynthetic process; F:precorrin-8X methylmutase activity
WP_003093701.1	MULTISPECIES: 30S ribosomal protein S14 [Pseudomonas]	30	3	24	3	11.6	879	3	0	Yes	1.07767	0.317312		-1.42069	0.0248415		4.58576	1.22968e-05	Up	-1.33711	0.016757		PA4250	rpsN	30S ribosomal protein S14	rpsN	2.5924	0.0157036	J	P:GO:0000028; P:GO:0006412; F:GO:0003735; F:GO:0019843; C:GO:0005618	P:ribosomal small subunit assembly; P:translation; F:structural constituent of ribosome; F:rRNA binding; C:cell wall			Coil (COILS); G3DSA:1.10.287.1480 (GENE3D); IPR001209 (PFAM); IPR001209 (PANTHER); PTHR19836:SF23 (PANTHER); IPR018271 (PROSITE_PATTERNS); IPR023036 (HAMAP); SSF57716 (SUPERFAMILY)	P:GO:0006412; F:GO:0003735; C:GO:0005840	P:translation; F:structural constituent of ribosome; C:ribosome
WP_003093744.1	MULTISPECIES: 30S ribosomal protein S12 [Pseudomonas]	35	5	39	5	13.8	865	5	0	Yes	1.05503	0.642036		1.25846	0.151495		4.55361	0.000494802	Up	-1.58907	0.0323696	Lower	PA4268	rpsL	30S ribosomal protein S12	rpsL	1.91977	0.0123405	J	P:GO:0000372; P:GO:0033120; P:GO:0034337; P:GO:1990145; F:GO:0000049; F:GO:0003735; F:GO:0019843; F:GO:0034336	P:Group I intron splicing; P:positive regulation of RNA splicing; P:RNA folding; P:maintenance of translational fidelity; F:tRNA binding; F:structural constituent of ribosome; F:rRNA binding; F:misfolded RNA binding			IPR006032 (PRINTS); IPR005679 (TIGRFAM); IPR006032 (PFAM); G3DSA:2.40.50.140 (GENE3D); IPR006032 (PIRSF); mobidb-lite (MOBIDB_LITE); IPR006032 (PANTHER); PTHR11652:SF1 (PANTHER); IPR006032 (PROSITE_PATTERNS); IPR005679 (HAMAP); IPR005679 (CDD); IPR012340 (SUPERFAMILY)	P:GO:0006412; F:GO:0003735; C:GO:0005840; C:GO:0015935	P:translation; F:structural constituent of ribosome; C:ribosome; C:small ribosomal subunit
WP_003093689.1	MULTISPECIES: 30S ribosomal protein S11 [Pseudomonadaceae]	42	5	43	5	13.6	1508	5	0	Yes	1.02767	0.719798		1.37927	0.0157434		4.45578	5.52785e-05	Up	-1.68584	0.00405258	Lower	PA4240	rpsK	30S ribosomal protein S11	rpsK	1.97303	0.0144347	J	P:GO:0000028; P:GO:0000462; P:GO:0006412; F:GO:0003735; F:GO:0048027; F:GO:0070181; C:GO:0005886	P:ribosomal small subunit assembly; P:maturation of SSU-rRNA from tricistronic rRNA transcript (SSU-rRNA, 5.8S rRNA, LSU-rRNA); P:translation; F:structural constituent of ribosome; F:mRNA 5'-UTR binding; F:small ribosomal subunit rRNA binding; C:plasma membrane			IPR019981 (TIGRFAM); IPR036967 (G3DSA:3.30.420.GENE3D); IPR001971 (PIRSF); IPR001971 (PFAM); PTHR11759:SF3 (PANTHER); IPR001971 (PANTHER); IPR018102 (PROSITE_PATTERNS); IPR001971 (HAMAP); SSF53137 (SUPERFAMILY)	P:GO:0006412; F:GO:0003735; C:GO:0005840	P:translation; F:structural constituent of ribosome; C:ribosome
WP_003084815.1	MULTISPECIES: acetyl-CoA carboxylase biotin carboxylase subunit [Pseudomonas]	17	7	12	7	50.1	390	7	0	Yes	1.07316	0.819197		1.59785	0.0792716		4.32271	0.00093816	Up	-1.19479	0.346049		PA0494		probable acyl-CoA carboxylase subunit	PA0494	1.52786	0.228623	I	P:GO:0045717; F:GO:0003989; F:GO:0004075; F:GO:0005524; F:GO:0046872; C:GO:0005829	P:negative regulation of fatty acid biosynthetic process; F:acetyl-CoA carboxylase activity; F:biotin carboxylase activity; F:ATP binding; F:metal ion binding; C:cytosol	EC:6.4.1.2; EC:6.3.4.14	Acetyl-CoA carboxylase; Biotin carboxylase	IPR005481 (PFAM); G3DSA:3.30.470.20 (GENE3D); IPR005479 (PFAM); IPR005482 (PFAM); PTHR48095 (PANTHER); IPR005479 (PROSITE_PATTERNS); IPR005479 (PROSITE_PATTERNS); IPR011764 (PROSITE_PROFILES); IPR011761 (PROSITE_PROFILES); IPR016185 (SUPERFAMILY); IPR011054 (SUPERFAMILY); SSF56059 (SUPERFAMILY)	F:GO:0005524; F:GO:0046872	F:ATP binding; F:metal ion binding
WP_017002184.1	MULTISPECIES: spermidine/putrescine ABC transporter substrate-binding protein [Pseudomonas]	22	6	17	6	39.2	363	6	0	Yes	1.21645	0.0181454		-1.21432	0.02048		4.30023	2.02605e-05	Up	-1.02172	0.749106		PA3610	potD	polyamine transport protein PotD	potD	-1.77183	7.14e-05	E	P:GO:0015846; F:GO:0019808; C:GO:0042597	P:polyamine transport; F:polyamine binding; C:periplasmic space			IPR001188 (PRINTS); IPR006059 (PFAM); IPR001188 (PIRSF); G3DSA:3.40.190.10 (GENE3D); G3DSA:3.40.190.10 (GENE3D); PTHR30222:SF12 (PANTHER); PTHR30222 (PANTHER); cd13590 (CDD); SSF53850 (SUPERFAMILY)	P:GO:0015846; F:GO:0019808; C:GO:0042597	P:polyamine transport; F:polyamine binding; C:periplasmic space
WP_014603568.1	MULTISPECIES: DUF2300 domain-containing protein [Pseudomonas]	4	2	3	2	61.7	88	2	0	Yes	-1.06093	0.704801		1.05468	0.63838		4.28439	0.000145788	Up				PA4488	magE	MagE	PA4488	2.08444	5.84e-10	S					IPR018748 (PFAM); IPR013693 (PFAM)	no GO terms	no GO terms
WP_003103876.1	MULTISPECIES: 30S ribosomal protein S10 [Bacteria]	55	6	62	6	11.8	1281	6	0	Yes	1.1024	0.225733		1.1378	0.147522		4.24074	4.51567e-06	Up	-1.63235	0.00282841	Lower	PA4264	rpsJ	30S ribosomal protein S10	rpsJ	1.91114	0.0264608	J	P:GO:0006355; P:GO:0006412; P:GO:0031564; F:GO:0000049; F:GO:0001072; F:GO:0003677; F:GO:0003735	P:regulation of transcription, DNA-templated; P:translation; P:transcription antitermination; F:tRNA binding; F:transcription antitermination factor activity, RNA binding; F:DNA binding; F:structural constituent of ribosome			IPR001848 (PRINTS); IPR027486 (PFAM); IPR036838 (G3DSA:3.30.70.GENE3D); IPR001848 (TIGRFAM); PTHR11700:SF9 (PANTHER); IPR001848 (PANTHER); IPR018268 (PROSITE_PATTERNS); IPR001848 (HAMAP); IPR036838 (SUPERFAMILY)	P:GO:0006412; F:GO:0003723; F:GO:0003735; C:GO:0005840	P:translation; F:RNA binding; F:structural constituent of ribosome; C:ribosome
WP_003096556.1	MULTISPECIES: 50S ribosomal protein L28 [Bacteria]	60	5	28	5	9.1	692	5	0	Yes	1.11206	0.18745		1.02145	0.753259		4.23324	3.13899e-06	Up	-1.43271	0.00263614		PA5316	rpmB	50S ribosomal protein L28	rpmB	1.9408	0.0199977	J	P:GO:0000027; P:GO:0006412; F:GO:0003735	P:ribosomal large subunit assembly; P:translation; F:structural constituent of ribosome			IPR026569 (PFAM); IPR001383 (TIGRFAM); IPR037147 (G3DSA:2.30.170.GENE3D); IPR026569 (PANTHER); PTHR13528:SF10 (PANTHER); IPR001383 (HAMAP); IPR034704 (SUPERFAMILY)	P:GO:0006412; F:GO:0003735; C:GO:0005840	P:translation; F:structural constituent of ribosome; C:ribosome
WP_003094164.1	MULTISPECIES: 50S ribosomal protein L13 [Pseudomonas]	38	5	35	5	16	619	5	0	Yes	1.05909	0.289865		-1.14054	0.0409094		4.23271	3.53392e-07	Up	-1.33715	0.00293044		PA4433	rplM	50S ribosomal protein L13	rplM	1.44428	0.0953612	J	P:GO:0017148; F:GO:0003729; F:GO:0003735; F:GO:0008270; F:GO:0070180; C:GO:0005618; C:GO:0005886	P:negative regulation of translation; F:mRNA binding; F:structural constituent of ribosome; F:zinc ion binding; F:large ribosomal subunit rRNA binding; C:cell wall; C:plasma membrane			IPR005823 (TIGRFAM); IPR036899 (G3DSA:3.90.1180.GENE3D); IPR005822 (PFAM); IPR005822 (PIRSF); PTHR11545:SF2 (PANTHER); IPR005822 (PANTHER); IPR023563 (PROSITE_PATTERNS); IPR005822 (HAMAP); IPR005822 (CDD); IPR036899 (SUPERFAMILY)	P:GO:0006412; F:GO:0003735; C:GO:0005840	P:translation; F:structural constituent of ribosome; C:ribosome
WP_003087920.1	MULTISPECIES: trigger factor [Pseudomonas]	53	19	126	19	48.6	3435	19	0	Yes	1.29159	7.06748e-05		-1.43622	0.000109858		4.2279	2.55336e-09	Up	1.0373	0.280565		PA1800	tig	trigger factor	tig	1.05238	0.514255	D	P:GO:0000413; P:GO:0007049; P:GO:0009408; P:GO:0015031; P:GO:0043335; P:GO:0051083; P:GO:0051301; P:GO:0061077; F:GO:0003755; F:GO:0042802; F:GO:0043022; F:GO:0044183; C:GO:0005829	P:protein peptidyl-prolyl isomerization; P:cell cycle; P:response to heat; P:protein transport; P:protein unfolding; P:'de novo' cotranslational protein folding; P:cell division; P:chaperone-mediated protein folding; F:peptidyl-prolyl cis-trans isomerase activity; F:identical protein binding; F:ribosome binding; F:protein folding chaperone; C:cytosol	EC:5.2.1.8	Peptidylprolyl isomerase	IPR005215 (TIGRFAM); IPR005215 (PIRSF); IPR037041 (G3DSA:1.10.3120.GENE3D); IPR001179 (PFAM); IPR036611 (G3DSA:3.30.70.GENE3D); G3DSA:3.10.50.40 (GENE3D); IPR008881 (PFAM); IPR008880 (PFAM); PTHR30560:SF3 (PANTHER); IPR005215 (PANTHER); IPR001179 (PROSITE_PROFILES); IPR005215 (HAMAP); IPR036611 (SUPERFAMILY); IPR027304 (SUPERFAMILY); SSF54534 (SUPERFAMILY)	P:GO:0006457; P:GO:0015031; F:GO:0003755	P:protein folding; P:protein transport; F:peptidyl-prolyl cis-trans isomerase activity
WP_003119196.1	MULTISPECIES: lipoyl synthase [Pseudomonas]	26	8	15	8	36.7	141	8	0	Yes	1.00105	0.851619		1.074	0.58077		4.21955	0.00105897	Up	-1.17417	0.33548		PA3996	lis	lipoate synthase	lis	1.3999	0.101068	H	P:GO:0009107; P:GO:0009249; F:GO:0016992; F:GO:0046872; F:GO:0051539; F:GO:1904047; C:GO:0005829	P:lipoate biosynthetic process; P:protein lipoylation; F:lipoate synthase activity; F:metal ion binding; F:4 iron, 4 sulfur cluster binding; F:S-adenosyl-L-methionine binding; C:cytosol	EC:2.8.1.8	Lipoyl synthase	IPR007197 (PFAM); IPR013785 (G3DSA:3.20.20.GENE3D); IPR003698 (PIRSF); IPR003698 (TIGRFAM); IPR031691 (PFAM); IPR007197 (SFLD); IPR003698 (SFLD); IPR003698 (PANTHER); PTHR10949:SF0 (PANTHER); IPR003698 (HAMAP); IPR007197 (PROSITE_PROFILES); cd01335 (CDD); SSF102114 (SUPERFAMILY)	P:GO:0009107; F:GO:0003824; F:GO:0016992; F:GO:0051536; F:GO:0051539	P:lipoate biosynthetic process; F:catalytic activity; F:lipoate synthase activity; F:iron-sulfur cluster binding; F:4 iron, 4 sulfur cluster binding
WP_003086452.1	MULTISPECIES: sigma-54-dependent Fis family transcriptional regulator [Pseudomonas]	16	7	13	7	51.1	235	7	0	Yes	-1.09512	0.103552		1.71127	6.94778e-05	Up	4.18486	8.89941e-07	Up				PA1099	fleR	two-component response regulator	fleR	-1.72658	0.000308862	T	P:GO:0000160; P:GO:0006355; F:GO:0003700; F:GO:0005524; F:GO:0008134; F:GO:0043565	P:phosphorelay signal transduction system; P:regulation of transcription, DNA-templated; F:DNA-binding transcription factor activity; F:ATP binding; F:transcription factor binding; F:sequence-specific DNA binding			IPR002197 (PRINTS); G3DSA:1.10.10.60 (GENE3D); IPR002078 (PFAM); IPR027417 (G3DSA:3.40.50.GENE3D); IPR001789 (PFAM); G3DSA:3.40.50.2300 (GENE3D); IPR002197 (PFAM); G3DSA:1.10.8.60 (GENE3D); mobidb-lite (MOBIDB_LITE); IPR029995 (PTHR32071:PANTHER); PTHR32071 (PANTHER); IPR025943 (PROSITE_PATTERNS); IPR025662 (PROSITE_PATTERNS); IPR025944 (PROSITE_PATTERNS); IPR002078 (PROSITE_PROFILES); IPR001789 …	P:GO:0000160; P:GO:0006355; F:GO:0005524; F:GO:0008134; F:GO:0043565	P:phosphorelay signal transduction system; P:regulation of transcription, DNA-templated; F:ATP binding; F:transcription factor binding; F:sequence-specific DNA binding
WP_003101226.1	MULTISPECIES: hypothetical protein [Pseudomonas]	51	7	19	7	22.4	488	7	0	Yes	1.22386	0.000339934		-1.47863	0.000274952		4.17671	3.99629e-09	Up	2.82619	0.000431931	Higher	PA0126		hypothetical protein	PA0126	4.0286	4.77e-15						PS51257 (PROSITE_PROFILES)	no GO terms	no GO terms
WP_003092026.1	MULTISPECIES: hypothetical protein [Pseudomonas]	19	7	13	7	44.4	292	7	0	Yes	1.20684	0.153922		1.48835	0.0153541		4.17113	7.09876e-05	Up	3.16322	0.0105595	Higher	PA3484	tse3	Tse3	PA3484	1.72809	0.00239254		F:GO:0003796; F:GO:0046872	F:lysozyme activity; F:metal ion binding	EC:3.2.1.17	Lysozyme	G3DSA:1.10.530.10 (GENE3D)	no GO terms	no GO terms
WP_003103908.1	MULTISPECIES: 50S ribosomal protein L22 [Pseudomonadaceae]	41	4	23	4	11.9	690	4	0	Yes	1.12914	0.507491		1.23908	0.190524		4.16035	0.000152791	Up	-1.25348	0.196212		PA4258	rplV	50S ribosomal protein L22	rplV	2.66564	0.0030117	J	P:GO:0006412; P:GO:0022618; P:GO:0042255; F:GO:0003735; F:GO:0019843; C:GO:0005618; C:GO:0042788	P:translation; P:ribonucleoprotein complex assembly; P:ribosome assembly; F:structural constituent of ribosome; F:rRNA binding; C:cell wall; C:polysomal ribosome			Coil (COILS); IPR005727 (TIGRFAM); IPR001063 (PFAM); IPR036394 (G3DSA:3.90.470.GENE3D); IPR005727 (PANTHER); IPR018260 (PROSITE_PATTERNS); IPR005727 (HAMAP); IPR001063 (CDD); IPR036394 (SUPERFAMILY)	P:GO:0006412; F:GO:0003735; C:GO:0005840; C:GO:0015934	P:translation; F:structural constituent of ribosome; C:ribosome; C:large ribosomal subunit
WP_003110747.1	MULTISPECIES: GMC family oxidoreductase [Pseudomonas]	11	6	12	6	64.7	396	6	0	Yes	1.12574	0.126926		-1.28365	0.0791327		4.11664	0.000299832	Up	0.996269	0.961368		PA2265		gluconate dehydrogenase	PA2265	-1.09986	0.533403	E	F:GO:0033717; F:GO:0050660	F:gluconate 2-dehydrogenase (acceptor) activity; F:flavin adenine dinucleotide binding	EC:1.1.1; EC:1.1.99.3	Acting on the CH-OH group of donors; Gluconate 2-dehydrogenase (acceptor)	IPR036188 (G3DSA:3.50.50.GENE3D); IPR000172 (PFAM); IPR036188 (G3DSA:3.50.50.GENE3D); IPR007867 (PFAM); PTHR46056:SF4 (PANTHER); PTHR46056 (PANTHER); IPR036188 (SUPERFAMILY); SSF54373 (SUPERFAMILY)	F:GO:0016614; F:GO:0050660	F:oxidoreductase activity, acting on CH-OH group of donors; F:flavin adenine dinucleotide binding
WP_003094142.1	MULTISPECIES: cell division protein FtsL [Pseudomonas]	19	2	5	2	11.1	163	2	0	Yes	1.01207	0.921298		1.43202	0.0290761		4.07723	0.000345229	Up	-1.44167	0.0205371		PA4419	ftsL	cell division protein FtsL	ftsL	1.21337	0.0208289	D	P:GO:0043093; C:GO:0005887; C:GO:0032153	P:FtsZ-dependent cytokinesis; C:integral component of plasma membrane; C:cell division site			IPR011922 (PFAM); IPR011922 (TIGRFAM); IPR011922 (PANTHER); IPR011922 (HAMAP)	P:GO:0051301; C:GO:0016021	P:cell division; C:integral component of membrane
WP_003093723.1	MULTISPECIES: 50S ribosomal protein L16 [Pseudomonas]	36	5	35	5	15.4	722	5	0	Yes	1.0579	0.440743		-1.10928	0.364377		4.02855	4.90981e-06	Up	-1.08042	0.30308		PA4256	rplP	50S ribosomal protein L16	rplP	2.58929	0.00705236	J	P:GO:0000027; P:GO:0006412; F:GO:0000049; F:GO:0003735; F:GO:0019843; C:GO:0005886	P:ribosomal large subunit assembly; P:translation; F:tRNA binding; F:structural constituent of ribosome; F:rRNA binding; C:plasma membrane			IPR000114 (PRINTS); IPR000114 (TIGRFAM); IPR016180 (PFAM); IPR036920 (G3DSA:3.90.1170.GENE3D); IPR000114 (PANTHER); IPR020798 (PROSITE_PATTERNS); IPR020798 (PROSITE_PATTERNS); IPR000114 (HAMAP); IPR016180 (CDD); IPR036920 (SUPERFAMILY)	P:GO:0006412; F:GO:0003735; F:GO:0019843; C:GO:0005840	P:translation; F:structural constituent of ribosome; F:rRNA binding; C:ribosome
WP_003094297.1	MULTISPECIES: cell division protein ZapE [Pseudomonas]	27	10	24	10	42	484	10	0	Yes	1.17734	0.000495414		1.08758	0.0236339		4.02702	1.49514e-08	Up	-1.31678	0.000488603		PA4438		conserved hypothetical protein	PA4438	-1.53722	0.000250143	D	P:GO:0007049; P:GO:0051301; F:GO:0005524; F:GO:0016887; C:GO:0005737; C:GO:0032153	P:cell cycle; P:cell division; F:ATP binding; F:ATP hydrolysis activity; C:cytoplasm; C:cell division site	EC:3.6.1	Acting on acid anhydrides	IPR027417 (G3DSA:3.40.50.GENE3D); IPR005654 (PFAM); IPR005654 (PANTHER); PTHR12169:SF6 (PANTHER); IPR030870 (HAMAP); IPR027417 (SUPERFAMILY)	P:GO:0051301; F:GO:0005524; F:GO:0016887	P:cell division; F:ATP binding; F:ATP hydrolysis activity
WP_003093692.1	MULTISPECIES: 30S ribosomal protein S13 [Pseudomonas]	52	6	39	6	13.3	1113	6	0	Yes	1.21449	0.183833		1.18674	0.242411		4.01976	0.000172731	Up	-1.11759	0.364905		PA4241	rpsM	30S ribosomal protein S13	rpsM	2.06977	0.0121542	J	P:GO:0006412; F:GO:0000049; F:GO:0003735; F:GO:0019843; C:GO:0005886	P:translation; F:tRNA binding; F:structural constituent of ribosome; F:rRNA binding; C:plasma membrane			Coil (COILS); IPR001892 (PFAM); IPR001892 (PIRSF); G3DSA:1.10.8.50 (GENE3D); IPR027437 (G3DSA:4.10.910.GENE3D); IPR019980 (TIGRFAM); mobidb-lite (MOBIDB_LITE); IPR019980 (PTHR10871:PANTHER); PTHR10871 (PANTHER); IPR018269 (PROSITE_PATTERNS); IPR001892 (HAMAP); IPR001892 (PROSITE_PROFILES); IPR010979 (SUPERFAMILY)	P:GO:0006412; F:GO:0003676; F:GO:0003723; F:GO:0003735; C:GO:0005840	P:translation; F:nucleic acid binding; F:RNA binding; F:structural constituent of ribosome; C:ribosome
WP_003092637.1	MULTISPECIES: 50S ribosomal protein L19 [Pseudomonas]	62	6	54	6	13	1497	6	0	Yes	0.998724	0.98812		-1.16386	0.0419574		4.00638	8.38733e-07	Up	1.07156	0.238696		PA3742	rplS	50S ribosomal protein L19	rplS	1.74007	0.0508253	J	P:GO:0000027; P:GO:0006412; F:GO:0003735; F:GO:0070180; C:GO:0005886	P:ribosomal large subunit assembly; P:translation; F:structural constituent of ribosome; F:large ribosomal subunit rRNA binding; C:plasma membrane			IPR001857 (PRINTS); IPR001857 (PFAM); IPR001857 (TIGRFAM); IPR038657 (G3DSA:2.30.30.GENE3D); IPR001857 (PIRSF); IPR001857 (PANTHER); PTHR15680:SF9 (PANTHER); IPR018257 (PROSITE_PATTERNS); IPR001857 (HAMAP); IPR008991 (SUPERFAMILY)	P:GO:0006412; F:GO:0003735; C:GO:0005840	P:translation; F:structural constituent of ribosome; C:ribosome
WP_003093700.1	MULTISPECIES: 30S ribosomal protein S8 [Pseudomonas]	45	6	71	6	14.2	1443	6	0	Yes	1.09981	0.308676		1.07747	0.377773		3.98907	0.00022931	Up	-1.44677	0.011668		PA4249	rpsH	30S ribosomal protein S8	rpsH	1.33173	0.224056	J	P:GO:0000028; P:GO:0006412; P:GO:0043488; F:GO:0003735; F:GO:0019843	P:ribosomal small subunit assembly; P:translation; P:regulation of mRNA stability; F:structural constituent of ribosome; F:rRNA binding			IPR000630 (PFAM); G3DSA:3.30.1490.10 (GENE3D); G3DSA:3.30.1370.30 (GENE3D); PTHR11758:SF4 (PANTHER); IPR000630 (PANTHER); IPR000630 (PROSITE_PATTERNS); IPR000630 (HAMAP); IPR035987 (SUPERFAMILY)	P:GO:0006412; F:GO:0003735; C:GO:0005840	P:translation; F:structural constituent of ribosome; C:ribosome
WP_003099086.1	MULTISPECIES: 50S ribosomal protein L20 [Gammaproteobacteria]	35	5	38	5	13.4	784	5	0	Yes	1.09862	0.253968		-1.32525	0.018675		3.98543	1.28355e-05	Up	-1.04296	0.543096		PA2741	rplT	50S ribosomal protein L20	rplT	1.89296	0.0341379	J	P:GO:0000027; P:GO:0006355; P:GO:0017148; F:GO:0000900; F:GO:0003729; F:GO:0003735; F:GO:0070180; C:GO:0005886	P:ribosomal large subunit assembly; P:regulation of transcription, DNA-templated; P:negative regulation of translation; F:translation repressor activity, mRNA regulatory element binding; F:mRNA binding; F:structural constituent of ribosome; F:large ribosomal subunit rRNA binding; C:plasma membrane			IPR005813 (PRINTS); IPR005813 (TIGRFAM); IPR005813 (PFAM); G3DSA:6.10.160.10 (GENE3D); IPR035566 (G3DSA:1.10.1900.GENE3D); IPR005813 (PANTHER); IPR005813 (PROSITE_PATTERNS); IPR005813 (HAMAP); IPR005813 (CDD); IPR035566 (SUPERFAMILY)	P:GO:0006412; F:GO:0003735; F:GO:0019843; C:GO:0005840	P:translation; F:structural constituent of ribosome; F:rRNA binding; C:ribosome
WP_034024234.1	filamentous hemagglutinin N-terminal domain-containing protein [Pseudomonas aeruginosa]	13	38	53	13	393.7	1626	38	0	Yes	1.1118	0.506245		-1.2202	0.297766		3.98209	0.000446296	Up										U					IPR006914 (PFAM); IPR008638 (PFAM); IPR010069 (TIGRFAM); IPR008638 (TIGRFAM); IPR012334 (G3DSA:2.160.20.GENE3D); IPR025157 (PFAM); IPR008619 (PFAM); mobidb-lite (MOBIDB_LITE); mobidb-lite (MOBIDB_LITE); mobidb-lite (MOBIDB_LITE); IPR011050 (SUPERFAMILY)	no GO terms	no GO terms
WP_003085555.1	MULTISPECIES: elongation factor 4 [Pseudomonas]	32	16	54	16	66.3	1266	16	0	Yes	1.12388	0.00471856		1.43848	8.34311e-05		3.96892	2.97499e-08	Up	-1.28395	0.00287631		PA0767	lepA	GTP-binding protein LepA	lepA	-1.516	0.719519	M	P:GO:0006414; P:GO:0009268; P:GO:0009409; P:GO:0009651; P:GO:0045727; F:GO:0003746; F:GO:0003924; F:GO:0005525; F:GO:0042802; F:GO:0043022; F:GO:0043023; F:GO:0043024; C:GO:0005829; C:GO:0005886	P:translational elongation; P:response to pH; P:response to cold; P:response to salt stress; P:positive regulation of translation; F:translation elongation factor activity; F:GTPase activity; F:GTP binding; F:identical protein binding; F:ribosome binding; F:ribosomal large subunit binding; F:ribosomal small subunit binding; C:cytosol; C:plasma membrane	EC:3.6.1	Acting on acid anhydrides	IPR000795 (PRINTS); G3DSA:3.30.70.240 (GENE3D); IPR013842 (PFAM); IPR005225 (TIGRFAM); IPR004161 (PFAM); IPR027417 (G3DSA:3.40.50.GENE3D); IPR000795 (PFAM); G3DSA:3.30.70.870 (GENE3D); IPR006297 (TIGRFAM); G3DSA:2.40.30.10 (GENE3D); IPR000640 (PFAM); IPR038363 (G3DSA:3.30.70.GENE3D); PTHR43512:SF4 (PANTHER); IPR006297 (PANTHER); IPR000795 (PROSITE_PROFILES); IPR006297 (HAMAP); IPR035654 (CDD); cd…	F:GO:0003924; F:GO:0005525	F:GTPase activity; F:GTP binding
WP_003093698.1	MULTISPECIES: 50S ribosomal protein L18 [Pseudomonas]	54	6	51	6	12.7	1692	6	0	Yes	1.13993	0.0980107		-1.30182	0.0137039		3.9524	2.33877e-06	Up	-1.33279	0.00855992		PA4247	rplR	50S ribosomal protein L18	rplR	1.4694	0.141139	J	P:GO:0006412; F:GO:0003735; F:GO:0008097	P:translation; F:structural constituent of ribosome; F:5S rRNA binding			IPR004389 (TIGRFAM); G3DSA:3.30.420.100 (GENE3D); IPR005484 (PFAM); IPR005484 (PANTHER); PTHR12899:SF3 (PANTHER); IPR004389 (HAMAP); cd00432 (CDD); SSF53137 (SUPERFAMILY)	P:GO:0006412; F:GO:0003735; C:GO:0005840	P:translation; F:structural constituent of ribosome; C:ribosome
WP_003103878.1	MULTISPECIES: 50S ribosomal protein L2 [Pseudomonas]	55	15	115	15	29.6	3419	15	0	Yes	1.05153	0.500031		-1.11081	0.252527		3.93735	6.76209e-06	Up	-1.10594	0.285785		PA4260	rplB	50S ribosomal protein L2	rplB	2.46045	0.00485032	J	P:GO:0000027; P:GO:0002181; F:GO:0003735; F:GO:0008270; F:GO:0016740; F:GO:0019843; C:GO:0005886	P:ribosomal large subunit assembly; P:cytoplasmic translation; F:structural constituent of ribosome; F:zinc ion binding; F:transferase activity; F:rRNA binding; C:plasma membrane	EC:2	Transferases	IPR022666 (PFAM); IPR002171 (PIRSF); IPR014722 (G3DSA:2.30.30.GENE3D); IPR005880 (TIGRFAM); IPR014726 (G3DSA:4.10.950.GENE3D); IPR022669 (PFAM); G3DSA:2.40.50.140 (GENE3D); mobidb-lite (MOBIDB_LITE); mobidb-lite (MOBIDB_LITE); PTHR13691:SF5 (PANTHER); IPR002171 (PANTHER); IPR022671 (PROSITE_PATTERNS); IPR005880 (HAMAP); IPR008991 (SUPERFAMILY); IPR012340 (SUPERFAMILY)	P:GO:0006412; F:GO:0003723; F:GO:0003735; F:GO:0016740; C:GO:0005840; C:GO:0015934	P:translation; F:RNA binding; F:structural constituent of ribosome; F:transferase activity; C:ribosome; C:large ribosomal subunit
WP_003118588.1	MULTISPECIES: GGDEF domain-containing protein [Pseudomonas]	23	6	8	6	26.8	270	6	0	Yes	1.12681	0.15317		1.68532	0.000706316	Up	3.93307	1.2937e-05	Up	2.19313	0.0586831		PA0169	siaD	SiaD	PA0169	1.2492	0.247966	T	P:GO:0043709; P:GO:1902201; F:GO:0052621; C:GO:0005886	P:cell adhesion involved in single-species biofilm formation; P:negative regulation of bacterial-type flagellum-dependent cell motility; F:diguanylate cyclase activity; C:plasma membrane	EC:2.7.7.65	Diguanylate cyclase	IPR000160 (PFAM); IPR043128 (G3DSA:3.30.70.GENE3D); IPR000160 (TIGRFAM); PTHR45138 (PANTHER); PTHR45138:SF9 (PANTHER); IPR000160 (PROSITE_PROFILES); IPR000160 (CDD); IPR029787 (SUPERFAMILY)	no GO terms	no GO terms
WP_003095184.1	MULTISPECIES: 30S ribosomal protein S15 [Pseudomonas]	49	4	44	4	10.1	1499	4	0	Yes	1.1497	0.0202889		-1.67124	0.000112937	Down	3.89457	1.82455e-07	Up	-1.39023	0.000725838		PA4741	rpsO	30S ribosomal protein S15	rpsO	2.36148	0.0111331	J	P:GO:0000028; P:GO:0006378; P:GO:0006412; F:GO:0003735; F:GO:0019843; C:GO:0005886	P:ribosomal small subunit assembly; P:mRNA polyadenylation; P:translation; F:structural constituent of ribosome; F:rRNA binding; C:plasma membrane			IPR000589 (PFAM); G3DSA:6.10.250.3130 (GENE3D); IPR005290 (TIGRFAM); G3DSA:1.10.287.10 (GENE3D); PTHR23321:SF26 (PANTHER); IPR005290 (PANTHER); IPR000589 (PROSITE_PATTERNS); IPR005290 (HAMAP); IPR000589 (CDD); IPR009068 (SUPERFAMILY)	P:GO:0006412; F:GO:0003735; C:GO:0005840	P:translation; F:structural constituent of ribosome; C:ribosome
WP_003093734.1	MULTISPECIES: 30S ribosomal protein S19 [Pseudomonadales]	33	3	20	3	10.4	326	3	0	Yes	1.17073	0.181603		-1.29632	0.0242738		3.87691	1.69385e-05	Up	-1.48043	0.00619924		PA4259	rpsS	30S ribosomal protein S19	rpsS	2.41213	0.00394852	J	P:GO:0000028; P:GO:0006412; F:GO:0003735; F:GO:0019843; C:GO:0005886	P:ribosomal small subunit assembly; P:translation; F:structural constituent of ribosome; F:rRNA binding; C:plasma membrane			IPR002222 (PRINTS); IPR005732 (TIGRFAM); IPR002222 (PFAM); IPR023575 (G3DSA:3.30.860.GENE3D); IPR002222 (PIRSF); PTHR11880:SF8 (PANTHER); IPR002222 (PANTHER); IPR020934 (PROSITE_PATTERNS); IPR002222 (HAMAP); IPR023575 (SUPERFAMILY)	P:GO:0006412; F:GO:0003723; F:GO:0003735; C:GO:0005840; C:GO:0015935	P:translation; F:RNA binding; F:structural constituent of ribosome; C:ribosome; C:small ribosomal subunit
WP_073660211.1	MULTISPECIES: type VI secretion system tip protein VgrG [Pseudomonas]	29	15	37	11	72	1009	15	0	Yes	1.82329	0.004907	Up	2.52665	6.55343e-05	Up	3.87167	3.71209e-06	Up	1.18341	0.117641		PA0091	vgrG1	VgrG1	vgrG1	3.23283	4.23e-08	S					G3DSA:2.30.110.50 (GENE3D); IPR037026 (G3DSA:2.40.50.GENE3D); PF05954 (PFAM); IPR006531 (PFAM); IPR006533 (TIGRFAM); G3DSA:3.55.50.10 (GENE3D); IPR017847 (TIGRFAM); G3DSA:4.10.220.110 (GENE3D); PTHR32305 (PANTHER); SSF69279 (SUPERFAMILY); SSF69349 (SUPERFAMILY); SSF69279 (SUPERFAMILY); SSF69255 (SUPERFAMILY)	no GO terms	no GO terms
WP_003093742.1	MULTISPECIES: 30S ribosomal protein S7 [Pseudomonas]	57	9	84	9	17.5	1408	9	0	Yes	1.07657	0.349669		-1.06183	0.508087		3.87116	0.000106714	Up	-1.45667	0.00689997		PA4267	rpsG	30S ribosomal protein S7	rpsG	1.81015	0.0205167	J	P:GO:0000028; P:GO:0017148; F:GO:0000049; F:GO:0003729; F:GO:0003735; F:GO:0019843; C:GO:0005618; C:GO:0005886	P:ribosomal small subunit assembly; P:negative regulation of translation; F:tRNA binding; F:mRNA binding; F:structural constituent of ribosome; F:rRNA binding; C:cell wall; C:plasma membrane			IPR023798 (PFAM); IPR000235 (PIRSF); IPR036823 (G3DSA:1.10.455.GENE3D); IPR005717 (TIGRFAM); PTHR11205:SF19 (PANTHER); IPR000235 (PANTHER); IPR020606 (PROSITE_PATTERNS); IPR005717 (HAMAP); cd14869 (CDD); IPR036823 (SUPERFAMILY)	P:GO:0006412; F:GO:0003723; F:GO:0003735; C:GO:0015935	P:translation; F:RNA binding; F:structural constituent of ribosome; C:small ribosomal subunit
WP_003095627.1	MULTISPECIES: 50S ribosomal protein L9 [Pseudomonas]	57	8	77	8	15.5	2958	8	0	Yes	1.05569	0.221997		-1.63882	4.36108e-05	Down	3.86196	2.41067e-05	Up	-1.24706	0.00301575		PA4932	rplI	50S ribosomal protein L9	rplI	2.14197	0.0483771	J	P:GO:0006412; F:GO:0003735; F:GO:0070180; C:GO:0005618; C:GO:0005886	P:translation; F:structural constituent of ribosome; F:large ribosomal subunit rRNA binding; C:cell wall; C:plasma membrane			Coil (COILS); IPR020594 (TIGRFAM); IPR036791 (G3DSA:3.10.430.GENE3D); IPR020069 (PFAM); IPR020070 (PFAM); IPR036935 (G3DSA:3.40.5.GENE3D); IPR000244 (PANTHER); IPR020070 (PROSITE_PATTERNS); IPR020594 (HAMAP); IPR036791 (SUPERFAMILY); IPR009027 (SUPERFAMILY)	P:GO:0006412; F:GO:0003735; C:GO:0005840	P:translation; F:structural constituent of ribosome; C:ribosome
WP_003093720.1	MULTISPECIES: 50S ribosomal protein L29 [Gammaproteobacteria]	38	2	16	2	7.2	609	2	0	Yes	1.13285	0.385516		-1.72727	0.00818215	Down	3.83107	0.000103849	Up	-1.50212	0.0154854	Lower	PA4255	rpmC	50S ribosomal protein L29	rpmC	2.61825	0.00475353	J	P:GO:0000027; P:GO:0006414; F:GO:0003735; F:GO:0003746	P:ribosomal large subunit assembly; P:translational elongation; F:structural constituent of ribosome; F:translation elongation factor activity			IPR001854 (TIGRFAM); IPR036049 (G3DSA:1.10.287.GENE3D); IPR001854 (PFAM); PTHR10916:SF0 (PANTHER); PTHR10916 (PANTHER); IPR018254 (PROSITE_PATTERNS); IPR001854 (HAMAP); cd00427 (CDD); IPR036049 (SUPERFAMILY)	P:GO:0006412; F:GO:0003735; C:GO:0005840	P:translation; F:structural constituent of ribosome; C:ribosome
WP_003094744.1	MULTISPECIES: 30S ribosomal protein S20 [Pseudomonas]	31	3	20	3	9.9	476	3	0	Yes	1.08092	0.36276		-1.68679	0.0232239	Down	3.82302	0.000176167	Up	-1.07382	0.52792		PA4563	rpsT	30S ribosomal protein S20	rpsT	-1.16414	0.13333	J	P:GO:0000028; P:GO:0006412; P:GO:0043086; F:GO:0003735; F:GO:0008073; F:GO:0070181	P:ribosomal small subunit assembly; P:translation; P:negative regulation of catalytic activity; F:structural constituent of ribosome; F:ornithine decarboxylase inhibitor activity; F:small ribosomal subunit rRNA binding			Coil (COILS); IPR002583 (PFAM); IPR036510 (G3DSA:1.20.58.GENE3D); IPR002583 (TIGRFAM); mobidb-lite (MOBIDB_LITE); PTHR33398:SF1 (PANTHER); IPR002583 (PANTHER); IPR002583 (HAMAP); IPR036510 (SUPERFAMILY)	P:GO:0006412; F:GO:0003723; F:GO:0003735; C:GO:0005840	P:translation; F:RNA binding; F:structural constituent of ribosome; C:ribosome
WP_023098921.1	hypothetical protein [Pseudomonas aeruginosa]	34	12	21	12	38	438	12	0	Yes	1.01784	0.706002		1.64125	0.00579307	Up	3.81238	0.0007203	Up															no IPS match	no IPS match	no IPS match
WP_003091930.1	MULTISPECIES: malate:quinone oxidoreductase [Pseudomonas]	25	12	55	12	57.2	1516	12	0	Yes	-1.10795	0.0152771		1.04357	0.147615		3.78275	1.00897e-08	Up	-1.55885	6.85594e-06	Lower	PA3452	mqoA	malate:quinone oxidoreductase	mqoA	1.16861	0.415035	C	P:GO:0006099; F:GO:0008924; F:GO:0052589; C:GO:0005737	P:tricarboxylic acid cycle; F:malate dehydrogenase (quinone) activity; F:malate dehydrogenase (menaquinone) activity; C:cytoplasm	EC:1.1.5.4	Malate dehydrogenase (quinone)	IPR006231 (PFAM); IPR006231 (TIGRFAM); PTHR13847 (PANTHER); PTHR13847:SF271 (PANTHER); PS51257 (PROSITE_PROFILES); IPR006231 (HAMAP); IPR036188 (SUPERFAMILY)	P:GO:0006099; F:GO:0008924	P:tricarboxylic acid cycle; F:malate dehydrogenase (quinone) activity
WP_003093441.1	MULTISPECIES: APH(3')-II family aminoglycoside O-phosphotransferase [Pseudomonas]	9	3	7	3	29.9	109	3	0	Yes	1.20787	0.466087		1.72264	0.0272319	Up	3.78194	0.000299818	Up	-1.08824	0.704878		PA4119	aph	aminoglycoside 3'-phosphotransferase type IIb	aph	-1.42652	0.00408772	J	P:GO:0016310; P:GO:0046677; F:GO:0005524; F:GO:0008910; F:GO:0046872	P:phosphorylation; P:response to antibiotic; F:ATP binding; F:kanamycin kinase activity; F:metal ion binding	EC:2.7.1.95	Kanamycin kinase	G3DSA:3.90.1200.10 (GENE3D); IPR024165 (PIRSF); IPR002575 (PFAM); G3DSA:3.30.200.20 (GENE3D); PTHR21310:SF41 (PANTHER); PTHR21310 (PANTHER); IPR024165 (CDD); IPR011009 (SUPERFAMILY)	P:GO:0046677; F:GO:0005524; F:GO:0016773	P:response to antibiotic; F:ATP binding; F:phosphotransferase activity, alcohol group as acceptor
WP_003089715.1	MULTISPECIES: aminomethyl-transferring glycine dehydrogenase [Pseudomonas]	24	20	70	19	103.7	2016	20	1	Yes	1.11238	0.0686538		1.41089	0.00101481		3.68942	5.03213e-07	Up	-1.17752	0.0329564		PA2445	gcvP2	glycine cleavage system protein P2	gcvP2	1.25251	0.108957	E	P:GO:0019464; F:GO:0004375	P:glycine decarboxylation via glycine cleavage system; F:glycine dehydrogenase (decarboxylating) activity	EC:1.4.4.2	Glycine dehydrogenase (aminomethyl-transferring)	Coil (COILS); Coil (COILS); IPR015422 (G3DSA:3.90.1150.GENE3D); IPR015421 (G3DSA:3.40.640.GENE3D); IPR003437 (TIGRFAM); IPR020581 (PFAM); PTHR11773:SF7 (PANTHER); IPR020581 (PANTHER); IPR003437 (HAMAP); IPR020581 (CDD); IPR015424 (SUPERFAMILY); IPR015424 (SUPERFAMILY)	P:GO:0006544; P:GO:0006546; F:GO:0003824; F:GO:0004375	P:glycine metabolic process; P:glycine catabolic process; F:catalytic activity; F:glycine dehydrogenase (decarboxylating) activity
WP_003092694.1	MULTISPECIES: aromatic amino acid transporter [Pseudomonas]	9	3	5	3	44.8	122	3	0	Yes	1.02745	0.792571		1.26134	0.230849		3.66587	0.000262749	Up	-1.24264	0.353665		PA3766		probable aromatic amino acid transporter	PA3766	-1.34852	0.0627144	E	P:GO:0003333; F:GO:0022857; C:GO:0016021	P:amino acid transmembrane transport; F:transmembrane transporter activity; C:integral component of membrane	EC:7	Translocases	PIRSF006060 (PIRSF); IPR018227 (PFAM); G3DSA:1.20.1740.10 (GENE3D); PTHR32195:SF26 (PANTHER); PTHR32195 (PANTHER)	P:GO:0003333	P:amino acid transmembrane transport
WP_003093678.1	MULTISPECIES: 30S ribosomal protein S4 [Pseudomonas]	50	11	77	11	23.3	1705	11	0	Yes	1.07446	0.176494		1.24646	0.00550735		3.63713	1.02442e-06	Up	-1.48453	0.000444328		PA4239	rpsD	30S ribosomal protein S4	rpsD	1.72311	0.0651614	J	P:GO:0000028; P:GO:0006355; P:GO:0031564; P:GO:0045903; P:GO:0045947; P:GO:1990145; F:GO:0000900; F:GO:0003735; F:GO:0019843; F:GO:0048027	P:ribosomal small subunit assembly; P:regulation of transcription, DNA-templated; P:transcription antitermination; P:positive regulation of translational fidelity; P:negative regulation of translational initiation; P:maintenance of translational fidelity; F:translation repressor activity, mRNA regulatory element binding; F:structural constituent of ribosome; F:rRNA binding; F:mRNA 5'-UTR binding			IPR002942 (PFAM); G3DSA:1.10.1050.10 (GENE3D); IPR036986 (G3DSA:3.10.290.GENE3D); IPR005709 (TIGRFAM); IPR001912 (PFAM); IPR005709 (PTHR11831:PANTHER); IPR022801 (PANTHER); IPR018079 (PROSITE_PATTERNS); IPR005709 (HAMAP); PS50889 (PROSITE_PROFILES); IPR002942 (CDD); SSF55174 (SUPERFAMILY)	P:GO:0006412; F:GO:0003723; F:GO:0003735; F:GO:0019843; C:GO:0015935	P:translation; F:RNA binding; F:structural constituent of ribosome; F:rRNA binding; C:small ribosomal subunit
WP_003087596.1	MULTISPECIES: type VI secretion system contractile sheath large subunit [Pseudomonas]	21	10	16	10	55.5	323	10	0	Yes	-1.21557	0.0176199		1.12534	0.0644417		3.62807	1.41361e-05	Up	1.37884	0.00239696		PA1658	hsiC2	HsiC2	PA1658	1.62722	0.172685	S	P:GO:0033103	P:protein secretion by the type VI secretion system			IPR044031 (PFAM); IPR044032 (PFAM); IPR010269 (TIGRFAM); IPR010269 (PANTHER); PTHR35565:SF1 (PANTHER)	no GO terms	no GO terms
WP_003098460.1	MULTISPECIES: glycerol-3-phosphate dehydrogenase [Pseudomonas]	11	4	8	4	57.1	277	4	0	Yes	-1.19327	0.186049		-1.12892	0.361653		3.57871	0.000369883	Up	-1.54868	0.0130457	Lower	PA3584	glpD	glycerol-3-phosphate dehydrogenase	glpD	-1.50972	0.0281167	C	P:GO:0006071; P:GO:0022900; P:GO:0046168; F:GO:0009055; F:GO:0052591; F:GO:0071949; C:GO:0005887; C:GO:0009331	P:glycerol metabolic process; P:electron transport chain; P:glycerol-3-phosphate catabolic process; F:electron transfer activity; F:sn-glycerol-3-phosphate:ubiquinone-8 oxidoreductase activity; F:FAD binding; C:integral component of plasma membrane; C:glycerol-3-phosphate dehydrogenase complex	EC:1.1.5.3	Glycerol-3-phosphate dehydrogenase	IPR000447 (PRINTS); IPR031656 (PFAM); G3DSA:6.10.250.1890 (GENE3D); IPR038299 (G3DSA:1.10.8.GENE3D); G3DSA:3.30.9.10 (GENE3D); IPR036188 (G3DSA:3.50.50.GENE3D); IPR006076 (PFAM); PTHR11985:SF15 (PANTHER); IPR000447 (PANTHER); PS00978 (PROSITE_PATTERNS); IPR000447 (PROSITE_PATTERNS); IPR036188 (SUPERFAMILY)	P:GO:0006072; F:GO:0004368; F:GO:0016491; C:GO:0009331	P:glycerol-3-phosphate metabolic process; F:glycerol-3-phosphate dehydrogenase (quinone) activity; F:oxidoreductase activity; C:glycerol-3-phosphate dehydrogenase complex
WP_003083621.1	MULTISPECIES: oligopeptidase A [Pseudomonas]	31	19	50	19	76	1565	19	0	Yes	1.55506	1.12623e-08	Up	1.20354	0.00528518		3.5762	2.3536e-07	Up	-1.06686	0.0189326		PA0067	prlC	oligopeptidase A	prlC	1.18366	0.306717	E	P:GO:0006508; F:GO:0004222; F:GO:0046872	P:proteolysis; F:metalloendopeptidase activity; F:metal ion binding	EC:3.4.24	Acting on peptide bonds (peptidases)	IPR001567 (PFAM); IPR024079 (G3DSA:3.40.390.GENE3D); IPR024077 (G3DSA:1.10.1370.GENE3D); IPR045666 (PFAM); IPR024080 (G3DSA:1.20.1050.GENE3D); IPR045090 (PANTHER); IPR034005 (CDD); SSF55486 (SUPERFAMILY)	P:GO:0006508; F:GO:0004222; F:GO:0008233; F:GO:0008237	P:proteolysis; F:metalloendopeptidase activity; F:peptidase activity; F:metallopeptidase activity
WP_003089254.1	MULTISPECIES: sodium:alanine symporter family protein [Pseudomonas]	6	2	5	2	51.5	224	2	0	Yes	-1.03897	0.664442		1.23239	0.0211121		3.57182	6.00566e-06	Up	-2.7301	9.05315e-05	Lower	PA2252		probable AGCS sodium/alanine/glycine symporter	PA2252	1.26451	0.066508	E	P:GO:0006814; P:GO:0032328; P:GO:0055085; F:GO:0015655; C:GO:0005886; C:GO:0016021	P:sodium ion transport; P:alanine transport; P:transmembrane transport; F:alanine:sodium symporter activity; C:plasma membrane; C:integral component of membrane	EC:7	Translocases	IPR001463 (PRINTS); G3DSA:1.20.1740.10 (GENE3D); IPR001463 (PFAM); IPR001463 (TIGRFAM); mobidb-lite (MOBIDB_LITE); PTHR30330:SF1 (PANTHER); IPR001463 (PANTHER); IPR001463 (PROSITE_PATTERNS)	P:GO:0006814; P:GO:0032328; F:GO:0015655; C:GO:0016020	P:sodium ion transport; P:alanine transport; F:alanine:sodium symporter activity; C:membrane
WP_073660185.1	MULTISPECIES: carboxy-S-adenosyl-L-methionine synthase CmoA [Pseudomonas]	25	6	15	6	27.6	363	6	0	Yes	1.10728	0.0840914		-1.09893	0.133632		3.57089	6.84911e-07	Up	-1.67929	0.000417901	Lower	PA0775		conserved hypothetical protein	PA0775	-1.96601	0.000221454	S	P:GO:0002098; P:GO:0032259; F:GO:0008168; F:GO:0016743; F:GO:1904047	P:tRNA wobble uridine modification; P:methylation; F:methyltransferase activity; F:carboxyl- or carbamoyltransferase activity; F:S-adenosyl-L-methionine binding	EC:2.1.1; EC:2.1.3	Transferring one-carbon groups; Transferring one-carbon groups	IPR041698 (PFAM); IPR005271 (TIGRFAM); IPR005271 (PIRSF); G3DSA:3.40.50.150 (GENE3D); PTHR43861 (PANTHER); IPR005271 (PTHR43861:PANTHER); IPR005271 (HAMAP); cd02440 (CDD); IPR029063 (SUPERFAMILY)	P:GO:0002098	P:tRNA wobble uridine modification
WP_003094815.1	MULTISPECIES: cytochrome-c peroxidase [Pseudomonas]	10	4	6	4	37.4	102	4	0	Yes	-1.06038	0.73185		-1.61229	0.0300473	Down	3.56847	0.00104387	Up	1.34835	0.203773		PA4587	ccpR	cytochrome c551 peroxidase precursor	ccpR	1.3778	0.0832153	C	P:GO:0022900; P:GO:0098869; F:GO:0004130; F:GO:0009055; F:GO:0020037; F:GO:0046872; C:GO:0042597	P:electron transport chain; P:cellular oxidant detoxification; F:cytochrome-c peroxidase activity; F:electron transfer activity; F:heme binding; F:metal ion binding; C:periplasmic space	EC:1.11.1.5	Cytochrome-c peroxidase	IPR009056 (PFAM); IPR036909 (G3DSA:1.10.760.GENE3D); IPR004852 (PFAM); IPR036909 (G3DSA:1.10.760.GENE3D); IPR026259 (PIRSF); PTHR30600 (PANTHER); PTHR30600:SF7 (PANTHER); IPR009056 (PROSITE_PROFILES); IPR009056 (PROSITE_PROFILES); IPR036909 (SUPERFAMILY); IPR036909 (SUPERFAMILY)	F:GO:0009055; F:GO:0016491; F:GO:0020037	F:electron transfer activity; F:oxidoreductase activity; F:heme binding
WP_003085573.1	MULTISPECIES: tRNA 5-methoxyuridine(34)/uridine 5-oxyacetic acid(34) synthase CmoB [Pseudomonas]	17	5	10	5	36.5	176	5	0	Yes	1.1645	0.0399817		1.27387	0.00519338		3.55425	1.60056e-06	Up	-1.20833	0.0636286		PA0774		conserved hypothetical protein	PA0774	-1.55772	0.0100968	J	P:GO:0002098; P:GO:0032259; P:GO:0051289; F:GO:0008168; F:GO:0016765; F:GO:0042802	P:tRNA wobble uridine modification; P:methylation; P:protein homotetramerization; F:methyltransferase activity; F:transferase activity, transferring alkyl or aryl (other than methyl) groups; F:identical protein binding	EC:2.5.1; EC:2.1.1	Transferring alkyl or aryl groups, other than methyl groups; Transferring one-carbon groups	G3DSA:3.40.50.150 (GENE3D); IPR010017 (TIGRFAM); IPR027555 (PFAM); PTHR43464 (PANTHER); PTHR43464:SF54 (PANTHER); IPR010017 (HAMAP); cd02440 (CDD); IPR029063 (SUPERFAMILY)	P:GO:0002098; F:GO:0016765	P:tRNA wobble uridine modification; F:transferase activity, transferring alkyl or aryl (other than methyl) groups
WP_003086407.1	MULTISPECIES: flagellar basal body L-ring protein FlgH [Pseudomonas]	9	2	3	2	24.4	153	2	0	Yes	1.40655	0.202721		1.98157	0.0584204		3.54788	0.0123516	Up	-1.14183	0.617725		PA1083	flgH	flagellar L-ring protein precursor FlgH	flgH	-1.01285	0.924072	N	P:GO:0071973; F:GO:0003774; C:GO:0009279; C:GO:0009427	P:bacterial-type flagellum-dependent cell motility; F:cytoskeletal motor activity; C:cell outer membrane; C:bacterial-type flagellum basal body, distal rod, L ring			IPR000527 (PRINTS); IPR000527 (PFAM); mobidb-lite (MOBIDB_LITE); IPR000527 (PANTHER); PTHR34933:SF1 (PANTHER); PS51257 (PROSITE_PROFILES); IPR000527 (HAMAP)	P:GO:0071973; F:GO:0003774; C:GO:0009427	P:bacterial-type flagellum-dependent cell motility; F:cytoskeletal motor activity; C:bacterial-type flagellum basal body, distal rod, L ring
WP_003095476.1	MULTISPECIES: Hsp70 family protein [Pseudomonas]	6	2	5	2	46.2	257	2	0	Yes	-1.22138	0.405739		1.17412	0.337198		3.53378	0.00389874	Up	-1.17269	0.3583		PA4873		probable heat-shock protein	PA4873	-1.18235	0.253438	O	F:GO:0005524; F:GO:0016887	F:ATP binding; F:ATP hydrolysis activity	EC:3.6.1	Acting on acid anhydrides	PR00301 (PRINTS); G3DSA:3.30.420.40 (GENE3D); G3DSA:3.30.420.40 (GENE3D); IPR013126 (PFAM); PTHR19375:SF355 (PANTHER); IPR013126 (PANTHER); IPR018181 (PROSITE_PATTERNS); IPR018181 (PROSITE_PATTERNS); IPR042054 (CDD); IPR043129 (SUPERFAMILY); IPR043129 (SUPERFAMILY)	F:GO:0005524; F:GO:0016887	F:ATP binding; F:ATP hydrolysis activity
WP_003092643.1	MULTISPECIES: 30S ribosomal protein S16 [Pseudomonas]	42	3	23	3	9.2	787	3	0	Yes	-1.11899	0.135594		-1.02897	0.697818		3.51982	9.20917e-07	Up	-1.63357	0.000228345	Lower	PA3745	rpsP	30S ribosomal protein S16	rpsP	-1.29117	0.026573	J	P:GO:0000028; P:GO:0006259; P:GO:0006412; P:GO:0090305; F:GO:0000400; F:GO:0003735; F:GO:0004520; C:GO:0005886	P:ribosomal small subunit assembly; P:DNA metabolic process; P:translation; P:nucleic acid phosphodiester bond hydrolysis; F:four-way junction DNA binding; F:structural constituent of ribosome; F:endodeoxyribonuclease activity; C:plasma membrane	EC:3.1	Acting on ester bonds	IPR000307 (PFAM); IPR023803 (G3DSA:3.30.1320.GENE3D); IPR000307 (TIGRFAM); IPR000307 (PANTHER); IPR000307 (HAMAP); IPR023803 (SUPERFAMILY)	P:GO:0006412; F:GO:0003735; C:GO:0005840	P:translation; F:structural constituent of ribosome; C:ribosome
WP_003091351.1	MULTISPECIES: NADPH-dependent 2,4-dienoyl-CoA reductase [Pseudomonas]	15	9	18	9	72.8	429	9	0	Yes	1.13249	0.251045		1.4346	0.0210931		3.50295	0.000179205	Up	-2.68523	0.00149753	Lower	PA3092	fadH1	2,4-dienoyl-CoA reductase FadH1	fadH1	-1.73049	0.00114644	C	P:GO:0033543; F:GO:0008670; F:GO:0010181; F:GO:0051539; F:GO:0071949	P:fatty acid beta-oxidation, unsaturated, even number, reductase/isomerase pathway; F:2,4-dienoyl-CoA reductase (NADPH) activity; F:FMN binding; F:4 iron, 4 sulfur cluster binding; F:FAD binding	EC:1.3.1.34	2,4-dienoyl-CoA reductase ((2E)-enoyl-CoA-producing)	PR00411 (PRINTS); PR00368 (PRINTS); IPR036188 (G3DSA:3.50.50.GENE3D); IPR013785 (G3DSA:3.20.20.GENE3D); IPR001155 (PFAM); G3DSA:3.40.50.720 (GENE3D); IPR023753 (PFAM); PTHR42917 (PANTHER); cd02930 (CDD); SSF51395 (SUPERFAMILY); SSF51971 (SUPERFAMILY); IPR036188 (SUPERFAMILY)	F:GO:0003824; F:GO:0010181; F:GO:0016491	F:catalytic activity; F:FMN binding; F:oxidoreductase activity
WP_003124592.1	MULTISPECIES: glycerophosphodiester phosphodiesterase [Pseudomonas]	9	3	5	3	41	161	3	0	Yes	-1.00749	0.733597		-1.80206	0.242768		3.49828	0.0163919	Up	1.60958	0.332659		PA2352		putative glycerophosphoryl diester phosphodiesterase	PA2352	-1.07509	0.577553	C	P:GO:0006629; F:GO:0008081	P:lipid metabolic process; F:phosphoric diester hydrolase activity	EC:3.1.4	Acting on ester bonds	IPR030395 (PFAM); IPR017946 (G3DSA:3.20.20.GENE3D); PTHR46211 (PANTHER); IPR030395 (PROSITE_PROFILES); cd08601 (CDD); IPR017946 (SUPERFAMILY)	P:GO:0006629; F:GO:0008081	P:lipid metabolic process; F:phosphoric diester hydrolase activity
WP_023098654.1	RHS repeat protein [Pseudomonas aeruginosa]	7	5	6	5	101.1	269	5	0	Yes	-1.10716	0.340227		-1.3673	0.0830251		3.48396	2.37882e-05	Up										M					G3DSA:2.180.10.10 (GENE3D); IPR031325 (PFAM); IPR006530 (TIGRFAM); G3DSA:2.180.10.10 (GENE3D); IPR022385 (TIGRFAM); mobidb-lite (MOBIDB_LITE); mobidb-lite (MOBIDB_LITE); mobidb-lite (MOBIDB_LITE); PTHR32305:SF15 (PANTHER); PTHR32305 (PANTHER); PTHR32305 (PANTHER); PTHR32305:SF15 (PANTHER)	no GO terms	no GO terms
WP_003093821.1	MULTISPECIES: inorganic phosphate transporter [Pseudomonas]	13	6	22	6	52.9	700	6	0	Yes	-1.08041	0.210393		-1.01754	0.800949		3.4763	1.15029e-06	Up	-1.13827	0.0623253		PA4292		probable phosphate transporter	PA4292	-1.33183	0.00469301	P	P:GO:0035435; F:GO:0005315; C:GO:0005887	P:phosphate ion transmembrane transport; F:inorganic phosphate transmembrane transporter activity; C:integral component of plasma membrane	EC:7	Translocases	IPR001204 (PFAM); IPR001204 (PANTHER); PTHR11101:SF65 (PANTHER)	P:GO:0006817; F:GO:0005315; C:GO:0016020	P:phosphate ion transport; F:inorganic phosphate transmembrane transporter activity; C:membrane
WP_003092394.1	MULTISPECIES: 30S ribosomal protein S2 [Pseudomonas]	54	11	75	11	27.3	1976	11	0	Yes	1.04029	0.501385		1.08561	0.14958		3.45992	1.52466e-06	Up	-1.34494	0.00299721		PA3656	rpsB	30S ribosomal protein S2	rpsB	1.77041	0.036225	J	P:GO:0000028; P:GO:0006412; F:GO:0003735; F:GO:0008270; C:GO:0005618; C:GO:0005886	P:ribosomal small subunit assembly; P:translation; F:structural constituent of ribosome; F:zinc ion binding; C:cell wall; C:plasma membrane			IPR001865 (PRINTS); G3DSA:3.40.50.10490 (GENE3D); G3DSA:1.10.287.610 (GENE3D); IPR001865 (PFAM); IPR005706 (TIGRFAM); IPR005706 (PANTHER); IPR018130 (PROSITE_PATTERNS); IPR018130 (PROSITE_PATTERNS); IPR005706 (HAMAP); IPR001865 (CDD); IPR023591 (SUPERFAMILY)	P:GO:0006412; F:GO:0003735; C:GO:0005840; C:GO:0015935	P:translation; F:structural constituent of ribosome; C:ribosome; C:small ribosomal subunit
WP_003082751.1	MULTISPECIES: TerC family protein [Pseudomonas]	7	3	6	3	57.3	254	3	0	Yes	1.38304	0.0607107		1.64612	0.015996	Up	3.45991	0.000255104	Up	-3.07886	0.000939062	Lower	PA1331		conserved hypothetical protein	PA1331	-1.03509	0.85054	P	F:GO:0050660; C:GO:0005886; C:GO:0016021	F:flavin adenine dinucleotide binding; C:plasma membrane; C:integral component of membrane			G3DSA:3.10.580.10 (GENE3D); IPR005496 (PFAM); IPR000644 (PFAM); IPR016169 (G3DSA:3.30.465.GENE3D); IPR005170 (PFAM); PTHR22777:SF30 (PANTHER); PTHR22777 (PANTHER); IPR000644 (PROSITE_PROFILES); IPR044751 (CDD); IPR036318 (SUPERFAMILY); SSF54631 (SUPERFAMILY)	F:GO:0050660; C:GO:0016021	F:flavin adenine dinucleotide binding; C:integral component of membrane
WP_003093699.1	MULTISPECIES: 50S ribosomal protein L6 [Pseudomonas]	55	10	90	10	19.1	2464	10	0	Yes	-1.01457	0.754385		-1.38351	0.000343517		3.44919	7.58616e-07	Up	-1.0377	0.684464		PA4248	rplF	50S ribosomal protein L6	rplF	1.34106	0.196654	J	P:GO:0000027; P:GO:0002181; F:GO:0003735; F:GO:0070180; C:GO:0005618; C:GO:0005886	P:ribosomal large subunit assembly; P:cytoplasmic translation; F:structural constituent of ribosome; F:large ribosomal subunit rRNA binding; C:cell wall; C:plasma membrane			IPR019906 (PRINTS); IPR036789 (G3DSA:3.90.930.GENE3D); IPR020040 (PFAM); IPR036789 (G3DSA:3.90.930.GENE3D); IPR000702 (PIRSF); IPR019906 (TIGRFAM); IPR019906 (PTHR11655:PANTHER); IPR000702 (PANTHER); IPR002358 (PROSITE_PATTERNS); IPR019906 (HAMAP); IPR036789 (SUPERFAMILY); IPR036789 (SUPERFAMILY)	P:GO:0006412; F:GO:0003735; F:GO:0019843; C:GO:0005840	P:translation; F:structural constituent of ribosome; F:rRNA binding; C:ribosome
WP_003086347.1	MULTISPECIES: hypothetical protein [Pseudomonas]	23	4	7	4	27.2	308	4	0	Yes	1.11721	0.392692		-1.4461	0.0993413		3.44491	0.000585536	Up	-1.28598	0.859974		PA1043		hypothetical protein	PA1043	1.01819	0.857245						mobidb-lite (MOBIDB_LITE); mobidb-lite (MOBIDB_LITE)	no GO terms	no GO terms
WP_003111636.1	MULTISPECIES: ABC transporter substrate-binding protein [Pseudomonas]	23	5	10	5	27.5	258	5	0	Yes	1.58698	0.000221635	Up	1.01338	0.843431		3.43979	8.83554e-07	Up	-4.3033	8.17724e-06	Lower	PA5139		hypothetical protein	PA5139	-1.49832	0.0014589	ET					IPR001638 (PFAM); G3DSA:3.40.190.10 (GENE3D); G3DSA:3.40.190.10 (GENE3D); PTHR38834 (PANTHER); SSF53850 (SUPERFAMILY)	no GO terms	no GO terms
WP_003093749.1	MULTISPECIES: 50S ribosomal protein L1 [Pseudomonas]	64	13	124	13	24.2	3089	13	0	Yes	1.04976	0.170006		-1.32547	0.000793943		3.42935	2.88949e-07	Up	1.09507	0.0385767		PA4273	rplA	50S ribosomal protein L1	rplA	1.89253	0.0510479	J	P:GO:0000470; P:GO:0006417; F:GO:0000049; F:GO:0003735; F:GO:0019843; C:GO:0005618; C:GO:0005886	P:maturation of LSU-rRNA; P:regulation of translation; F:tRNA binding; F:structural constituent of ribosome; F:rRNA binding; C:cell wall; C:plasma membrane			IPR002143 (PIRSF); IPR016095 (G3DSA:3.40.50.GENE3D); IPR028364 (PFAM); G3DSA:3.30.190.20 (GENE3D); IPR005878 (TIGRFAM); PTHR36427 (PANTHER); IPR023673 (PROSITE_PATTERNS); IPR005878 (HAMAP); IPR028364 (CDD); IPR023674 (SUPERFAMILY)	P:GO:0006412; F:GO:0003723; F:GO:0003735; C:GO:0015934	P:translation; F:RNA binding; F:structural constituent of ribosome; C:large ribosomal subunit
WP_003090625.1	MULTISPECIES: ATP-binding protein [Pseudomonas]	5	6	9	6	144.2	226	6	0	Yes	1.23651	0.489263		1.28978	0.438504		3.42408	0.00227523	Up										D	F:GO:0005524	F:ATP binding			Coil (COILS); Coil (COILS); Coil (COILS); Coil (COILS); Coil (COILS); Coil (COILS); Coil (COILS); Coil (COILS); IPR027417 (G3DSA:3.40.50.GENE3D); IPR021979 (PFAM); cd00267 (CDD); IPR027417 (SUPERFAMILY)	no GO terms	no GO terms
WP_003084998.1	MULTISPECIES: DUF4375 domain-containing protein [Pseudomonas]	20	3	6	3	22.5	170	3	0	Yes	1.02313	0.928987		1.38646	0.0157782		3.39816	0.000171134	Up	1.30557	0.175564		PA0571		hypothetical protein	PA0571	1.18378	0.144308	S					IPR025402 (PFAM); G3DSA:1.20.1420.60 (GENE3D)	no GO terms	no GO terms
WP_003087752.1	MULTISPECIES: hypothetical protein [Pseudomonas]	29	4	11	4	14	281	4	0	Yes	1.0627	0.864293		1.07189	0.489967		3.37405	7.35561e-05	Up	-1.07135	0.459377		PA1741		hypothetical protein	PA1741	-1.06614	0.521663	O	P:GO:0006749; P:GO:0022900; P:GO:0045454; F:GO:0005515; F:GO:0009055; F:GO:0015035	P:glutathione metabolic process; P:electron transport chain; P:cell redox homeostasis; F:protein binding; F:electron transfer activity; F:protein-disulfide reductase activity	EC:1.8	Acting on a sulfur group of donors	IPR004045 (PFAM); G3DSA:3.40.30.10 (GENE3D); PS51354 (PROSITE_PROFILES); IPR036249 (SUPERFAMILY)	P:GO:0006749; F:GO:0005515	P:glutathione metabolic process; F:protein binding
WP_009877078.1	MULTISPECIES: tyrosine--tRNA ligase [Pseudomonas]	31	10	17	10	45.1	335	10	0	Yes	1.25824	0.152753		1.11708	0.284966		3.35968	0.000950738	Up	1.30143	0.0725719		PA4138	tyrS	tyrosyl-tRNA synthetase	tyrS	-1.8089	0.00247554	J	P:GO:0006437; F:GO:0003723; F:GO:0004831; F:GO:0005524; C:GO:0005618; C:GO:0005737; C:GO:0005886	P:tyrosyl-tRNA aminoacylation; F:RNA binding; F:tyrosine-tRNA ligase activity; F:ATP binding; C:cell wall; C:cytoplasm; C:plasma membrane	EC:6.1.1.1	Tyrosine--tRNA ligase	IPR002307 (PRINTS); G3DSA:1.10.240.10 (GENE3D); IPR002307 (TIGRFAM); IPR002305 (PFAM); IPR036986 (G3DSA:3.10.290.GENE3D); IPR014729 (G3DSA:3.40.50.GENE3D); IPR024088 (PANTHER); IPR024107 (HAMAP); PS50889 (PROSITE_PROFILES); IPR002307 (CDD); SSF52374 (SUPERFAMILY); SSF55174 (SUPERFAMILY)	P:GO:0006418; P:GO:0006437; F:GO:0000166; F:GO:0003723; F:GO:0004812; F:GO:0004831; F:GO:0005524	P:tRNA aminoacylation for protein translation; P:tyrosyl-tRNA aminoacylation; F:nucleotide binding; F:RNA binding; F:aminoacyl-tRNA ligase activity; F:tyrosine-tRNA ligase activity; F:ATP binding
WP_003086254.1	MULTISPECIES: quinolinate synthase NadA [Pseudomonas]	16	5	11	5	38.4	349	5	0	Yes	1.17196	0.267674		1.01209	0.968225		3.35497	0.000104728	Up	-1.05905	0.6579		PA1004	nadA	quinolinate synthetase A	nadA	-1.27629	0.00464901	H	P:GO:0006805; P:GO:0019674; P:GO:0019805; P:GO:0034628; F:GO:0008987; F:GO:0046872; F:GO:0051539; C:GO:0005829	P:xenobiotic metabolic process; P:NAD metabolic process; P:quinolinate biosynthetic process; P:'de novo' NAD biosynthetic process from aspartate; F:quinolinate synthetase A activity; F:metal ion binding; F:4 iron, 4 sulfur cluster binding; C:cytosol	EC:2.5.1	Transferring alkyl or aryl groups, other than methyl groups	IPR036094 (G3DSA:3.40.50.GENE3D); IPR036094 (G3DSA:3.40.50.GENE3D); IPR003473 (TIGRFAM); IPR003473 (PFAM); IPR036094 (G3DSA:3.40.50.GENE3D); IPR003473 (PANTHER); IPR023513 (HAMAP); IPR036094 (SUPERFAMILY)	P:GO:0009435; F:GO:0008987; F:GO:0016765; F:GO:0051539	P:NAD biosynthetic process; F:quinolinate synthetase A activity; F:transferase activity, transferring alkyl or aryl (other than methyl) groups; F:4 iron, 4 sulfur cluster binding
WP_003094795.1	MULTISPECIES: slipin family protein [Pseudomonas]	32	11	18	11	43.1	379	11	0	Yes	1.14057	0.0980657		-1.11966	0.141082		3.33288	1.34137e-05	Up	1.43038	0.00366507		PA4582		conserved hypothetical protein	PA4582	-2.50508	3.36e-06	O	C:GO:0005886	C:plasma membrane			IPR001972 (PRINTS); G3DSA:6.10.250.2090 (GENE3D); IPR001107 (PFAM); IPR036013 (G3DSA:3.30.479.GENE3D); IPR043202 (PANTHER); PTHR10264:SF83 (PANTHER); cd13438 (CDD); IPR036013 (SUPERFAMILY)	C:GO:0005886; C:GO:0016020	C:plasma membrane; C:membrane
WP_003093989.1	MULTISPECIES: ATPase [Pseudomonas]	55	13	43	13	30.8	1573	13	0	Yes	-1.0942	0.00774012		-1.28108	9.46259e-06		3.31759	8.52778e-09	Up											C:GO:0016021	C:integral component of membrane			Coil (COILS); Coil (COILS); Coil (COILS); mobidb-lite (MOBIDB_LITE)	no GO terms	no GO terms
WP_003096009.1	MULTISPECIES: translational GTPase TypA [Pseudomonas]	31	16	50	16	66.9	1526	16	0	Yes	1.12595	0.101329		1.10596	0.151384		3.28629	3.78145e-06	Up	-1.22431	0.0184127		PA5117	typA	regulatory protein TypA	typA	1.05981	0.666245	T	P:GO:0000027; P:GO:0006412; P:GO:0009408; P:GO:0009409; P:GO:0030254; P:GO:0043709; P:GO:0050714; P:GO:0071236; P:GO:0071978; F:GO:0003924; F:GO:0005525; C:GO:0005829; C:GO:1990904	P:ribosomal large subunit assembly; P:translation; P:response to heat; P:response to cold; P:protein secretion by the type III secretion system; P:cell adhesion involved in single-species biofilm formation; P:positive regulation of protein secretion; P:cellular response to antibiotic; P:bacterial-type flagellum-dependent swarming motility; F:GTPase activity; F:GTP binding; C:cytosol; C:ribonucleo…	EC:3.6.1	Acting on acid anhydrides	Coil (COILS); IPR000795 (PRINTS); IPR042116 (G3DSA:2.40.50.GENE3D); IPR005225 (TIGRFAM); G3DSA:3.30.70.870 (GENE3D); IPR000640 (PFAM); IPR004161 (PFAM); G3DSA:2.40.30.10 (GENE3D); G3DSA:3.30.70.240 (GENE3D); IPR000795 (PFAM); IPR027417 (G3DSA:3.40.50.GENE3D); IPR006298 (TIGRFAM); PTHR42908 (PANTHER); IPR006298 (PTHR42908:PANTHER); IPR031157 (PROSITE_PATTERNS); IPR006298 (HAMAP); IPR000795 (PROSIT…	F:GO:0003924; F:GO:0005525	F:GTPase activity; F:GTP binding
WP_003098810.1	MULTISPECIES: 30S ribosomal protein S9 [Pseudomonas]	37	5	41	5	14.6	1283	5	0	Yes	1.01086	0.828128		1.19749	0.218247		3.28184	5.49223e-05	Up	-1.08518	0.421617		PA4432	rpsI	30S ribosomal protein S9	rpsI	1.44875	0.214703	J	P:GO:0006412; F:GO:0003723; F:GO:0003735	P:translation; F:RNA binding; F:structural constituent of ribosome			IPR014721 (G3DSA:3.30.230.GENE3D); IPR000754 (PFAM); PTHR21569:SF1 (PANTHER); IPR000754 (PANTHER); IPR020574 (PROSITE_PATTERNS); IPR023035 (HAMAP); IPR020568 (SUPERFAMILY)	P:GO:0006412; F:GO:0003735; C:GO:0005840	P:translation; F:structural constituent of ribosome; C:ribosome
WP_003119359.1	MULTISPECIES: Spermidine/putrescine import ATP-binding protein PotA 2 [Pseudomonas]	21	7	12	7	40	369	7	0	Yes	-1.01357	0.728267		-1.0196	0.597078		3.2609	5.98668e-05	Up	1.15917	0.139261		PA3607	potA	polyamine transport protein PotA	potA	-1.92707	7.69e-05	E	P:GO:0015847; P:GO:1903711; F:GO:0005524; F:GO:0015594; F:GO:0016887	P:putrescine transport; P:spermidine transmembrane transport; F:ATP binding; F:ABC-type putrescine transporter activity; F:ATP hydrolysis activity	EC:3.6.1; EC:7.6.2.11; EC:7.6.2.16	Acting on acid anhydrides; ABC-type polyamine transporter; ABC-type putrescine transporter	IPR003439 (PFAM); IPR005893 (TIGRFAM); IPR027417 (G3DSA:3.40.50.GENE3D); G3DSA:2.40.50.100 (GENE3D); IPR013611 (PFAM); PTHR42781 (PANTHER); PTHR42781:SF5 (PANTHER); IPR017871 (PROSITE_PATTERNS); IPR003439 (PROSITE_PROFILES); IPR008995 (SUPERFAMILY); IPR027417 (SUPERFAMILY)	P:GO:0015846; P:GO:0055085; F:GO:0005524; F:GO:0015417; F:GO:0022857; C:GO:0043190	P:polyamine transport; P:transmembrane transport; F:ATP binding; F:ABC-type polyamine transporter activity; F:transmembrane transporter activity; C:ATP-binding cassette (ABC) transporter complex
WP_003093737.1	MULTISPECIES: 50S ribosomal protein L4 [Pseudomonas]	68	12	107	12	21.6	2990	12	0	Yes	-1.0626	0.171079		-1.10702	0.0605337		3.25227	1.30358e-06	Up	-1.02417	0.516667		PA4262	rplD	50S ribosomal protein L4	rplD	2.00532	0.0244552	J	P:GO:0017148; P:GO:0022618; P:GO:0042255; P:GO:0045892; P:GO:0060702; F:GO:0001217; F:GO:0003735; F:GO:0019843; F:GO:0030371; F:GO:0060698; C:GO:0005618; C:GO:0005886; C:GO:0032993; C:GO:0042788	P:negative regulation of translation; P:ribonucleoprotein complex assembly; P:ribosome assembly; P:negative regulation of transcription, DNA-templated; P:negative regulation of endoribonuclease activity; F:DNA-binding transcription repressor activity; F:structural constituent of ribosome; F:rRNA binding; F:translation repressor activity; F:endoribonuclease inhibitor activity; C:cell wall; C:plasm…			IPR023574 (G3DSA:3.40.1370.GENE3D); IPR013005 (TIGRFAM); IPR002136 (PFAM); mobidb-lite (MOBIDB_LITE); IPR013005 (PANTHER); IPR013005 (HAMAP); IPR023574 (SUPERFAMILY)	P:GO:0006412; F:GO:0003735; C:GO:0005840	P:translation; F:structural constituent of ribosome; C:ribosome
WP_003095636.1	MULTISPECIES: 30S ribosomal protein S6 [Pseudomonas]	60	7	61	7	16.2	1942	7	0	Yes	1.03819	0.445147		-1.00704	0.881893		3.23195	5.01192e-07	Up	-1.42804	0.000180137		PA4935	rpsF	30S ribosomal protein S6	rpsF	2.01091	0.0158412	J	P:GO:0006412; F:GO:0003735; F:GO:0048027; F:GO:0070181	P:translation; F:structural constituent of ribosome; F:mRNA 5'-UTR binding; F:small ribosomal subunit rRNA binding			IPR000529 (PFAM); IPR000529 (TIGRFAM); IPR014717 (G3DSA:3.30.70.GENE3D); mobidb-lite (MOBIDB_LITE); mobidb-lite (MOBIDB_LITE); PTHR21011:SF1 (PANTHER); IPR000529 (PANTHER); IPR020815 (PROSITE_PATTERNS); IPR020814 (HAMAP); IPR020814 (CDD); IPR035980 (SUPERFAMILY)	P:GO:0006412; F:GO:0003735; F:GO:0019843; C:GO:0005840	P:translation; F:structural constituent of ribosome; F:rRNA binding; C:ribosome
WP_003094393.1	MULTISPECIES: rod shape-determining protein [Pseudomonas]	45	14	67	14	37	2384	14	0	Yes	1.15379	0.0344768		1.10406	0.160668		3.22226	1.09894e-06	Up	1.02752	0.691597		PA4481	mreB	rod shape-determining protein MreB	mreB	-1.55448	0.00341967	D	P:GO:0008360; P:GO:0043093; P:GO:0051128; P:GO:0051782; P:GO:0051983; F:GO:0042802; C:GO:0005856; C:GO:0031226	P:regulation of cell shape; P:FtsZ-dependent cytokinesis; P:regulation of cellular component organization; P:negative regulation of cell division; P:regulation of chromosome segregation; F:identical protein binding; C:cytoskeleton; C:intrinsic component of plasma membrane			Coil (COILS); IPR004753 (PRINTS); G3DSA:3.30.420.40 (GENE3D); G3DSA:3.30.420.40 (GENE3D); IPR004753 (TIGRFAM); PF06723 (PFAM); PTHR42749:SF4 (PANTHER); PTHR42749 (PANTHER); IPR004753 (HAMAP); IPR004753 (CDD); IPR043129 (SUPERFAMILY); IPR043129 (SUPERFAMILY)	P:GO:0000902	P:cell morphogenesis
WP_003093697.1	MULTISPECIES: 30S ribosomal protein S5 [Pseudomonas]	50	7	85	7	17.6	2428	7	0	Yes	-1.0751	0.130839		1.28129	0.00784845		3.22082	2.11092e-07	Up	-1.3113	0.0022752		PA4246	rpsE	30S ribosomal protein S5	rpsE	1.55587	0.126327	J	P:GO:0000028; P:GO:1990145; F:GO:0003735; F:GO:0019843; C:GO:0005886	P:ribosomal small subunit assembly; P:maintenance of translational fidelity; F:structural constituent of ribosome; F:rRNA binding; C:plasma membrane			IPR005712 (TIGRFAM); G3DSA:3.30.160.20 (GENE3D); IPR014721 (G3DSA:3.30.230.GENE3D); IPR005324 (PFAM); IPR013810 (PFAM); PTHR13718:SF61 (PANTHER); IPR000851 (PANTHER); IPR018192 (PROSITE_PATTERNS); IPR005712 (HAMAP); IPR013810 (PROSITE_PROFILES); IPR020568 (SUPERFAMILY); SSF54768 (SUPERFAMILY)	P:GO:0006412; F:GO:0003723; F:GO:0003735; C:GO:0005840; C:GO:0015935	P:translation; F:RNA binding; F:structural constituent of ribosome; C:ribosome; C:small ribosomal subunit
WP_003085991.1	MULTISPECIES: hypothetical protein [Pseudomonas]	21	2	3	2	17.9	147	2	0	Yes	1.00833	0.888448		1.17538	0.253105		3.17576	0.00139744	Up				PA0910	alpD	AlpD	PA0910	-1.6798	5.31e-05						no IPS match	no IPS match	no IPS match
WP_003094761.1	MULTISPECIES: 50S ribosomal protein L21 [Pseudomonas]	67	8	67	8	11.6	2233	8	0	Yes	-1.03761	0.524825		-1.24989	0.00823898		3.16185	2.42087e-06	Up	0.999268	0.961659		PA4568	rplU	50S ribosomal protein L21	rplU	1.26327	0.228899	J	P:GO:0006412; F:GO:0003735; F:GO:0019843; C:GO:0005886	P:translation; F:structural constituent of ribosome; F:rRNA binding; C:plasma membrane			IPR028909 (PFAM); IPR001787 (TIGRFAM); IPR028909 (PANTHER); IPR018258 (PROSITE_PATTERNS); IPR001787 (HAMAP); IPR036164 (SUPERFAMILY)	P:GO:0006412; F:GO:0003723; F:GO:0003735; C:GO:0005840	P:translation; F:RNA binding; F:structural constituent of ribosome; C:ribosome
WP_003091731.1	MULTISPECIES: flagellar basal body P-ring formation protein FlgA [Pseudomonas]	14	3	4	3	25.5	110	3	0	Yes	1.13412	0.554706		1.31545	0.229276		3.16094	0.00784064	Up	-2.33047	0.0229621	Lower	PA3350		hypothetical protein	PA3350	-1.55387	0.00213577	N	P:GO:0044780; C:GO:0042597	P:bacterial-type flagellum assembly; C:periplasmic space			IPR017585 (TIGRFAM); G3DSA:2.30.30.760 (GENE3D); IPR017585 (PFAM); IPR041231 (PFAM); G3DSA:3.90.1210.10 (GENE3D); PTHR36307:SF1 (PANTHER); IPR039246 (PANTHER); cd11614 (CDD)	P:GO:0044780	P:bacterial-type flagellum assembly
WP_003095661.1	MULTISPECIES: AMIN domain-containing protein [Pseudomonas]	20	9	15	9	50.7	510	9	0	Yes	1.11988	0.323032		-1.6001	0.0109452	Down	3.13559	0.000446886	Up	2.25504	0.00688212	Higher	PA4947	amiB	N-acetylmuramoyl-L-alanine amidase	amiB	1.03412	0.672895	M	P:GO:0009253; F:GO:0008745; C:GO:0030288	P:peptidoglycan catabolic process; F:N-acetylmuramoyl-L-alanine amidase activity; C:outer membrane-bounded periplasmic space	EC:3.5.1.28	N-acetylmuramoyl-L-alanine amidase	Coil (COILS); IPR018392 (PFAM); IPR021731 (PFAM); G3DSA:2.60.40.3500 (GENE3D); G3DSA:3.40.630.40 (GENE3D); IPR036779 (G3DSA:3.10.350.GENE3D); IPR002508 (PFAM); mobidb-lite (MOBIDB_LITE); mobidb-lite (MOBIDB_LITE); PTHR30404:SF1 (PANTHER); PTHR30404 (PANTHER); PS51257 (PROSITE_PROFILES); IPR018392 (PROSITE_PROFILES); IPR018392 (CDD); IPR002508 (CDD); SSF53187 (SUPERFAMILY); IPR036779 (SUPERFAMILY)	P:GO:0009253; F:GO:0008745	P:peptidoglycan catabolic process; F:N-acetylmuramoyl-L-alanine amidase activity
WP_023098838.1	cytochrome c [Pseudomonas aeruginosa]	14	4	12	4	44.7	289	4	0	Yes	1.09902	0.103879		-2.13386	3.01479e-07	Down	3.13438	1.7353e-05	Up	2.20325	0.000135182	Higher	PA4619		probable c-type cytochrome	PA4619	1.07441	0.629825	C	P:GO:0022900; F:GO:0005506; F:GO:0009055; F:GO:0016614; F:GO:0020037; C:GO:0016020	P:electron transport chain; F:iron ion binding; F:electron transfer activity; F:oxidoreductase activity, acting on CH-OH group of donors; F:heme binding; C:membrane	EC:1.1	Acting on the CH-OH group of donors	IPR008168 (PRINTS); IPR014353 (PIRSF); IPR009056 (PFAM); IPR036909 (G3DSA:1.10.760.GENE3D); IPR036909 (G3DSA:1.10.760.GENE3D); IPR009056 (PFAM); PTHR35008:SF8 (PANTHER); PTHR35008 (PANTHER); IPR009056 (PROSITE_PROFILES); IPR009056 (PROSITE_PROFILES); IPR009056 (PROSITE_PROFILES); IPR036909 (SUPERFAMILY); IPR036909 (SUPERFAMILY); IPR036909 (SUPERFAMILY)	F:GO:0005506; F:GO:0009055; F:GO:0016614; F:GO:0020037; C:GO:0016020	F:iron ion binding; F:electron transfer activity; F:oxidoreductase activity, acting on CH-OH group of donors; F:heme binding; C:membrane
WP_003093890.1	MULTISPECIES: hypothetical protein [Pseudomonas]	26	5	27	5	26.7	837	5	0	Yes	1.0178	0.827365		1.18831	0.059852		3.13059	1.1012e-05	Up	2.04425	0.000161725	Higher	PA4317		hypothetical protein	PA4317	1.17431	0.304786	S	C:GO:0016021	C:integral component of membrane			IPR010380 (PANTHER)	no GO terms	no GO terms
WP_003092845.1	MULTISPECIES: inositol monophosphatase [Pseudomonas]	44	11	40	11	29.5	1170	11	0	Yes	1.20976	0.00132803		-1.12847	0.0940883		3.11843	6.45882e-08	Up	-1.62677	0.0204382	Lower	PA3818		extragenic suppressor protein SuhB	PA3818	-2.14436	5.69e-07	G	P:GO:0006020; P:GO:0007165; P:GO:0046854; P:GO:0046855; F:GO:0000287; F:GO:0008934; F:GO:0031403; F:GO:0047954; F:GO:0052832; F:GO:0052833; C:GO:0005829	P:inositol metabolic process; P:signal transduction; P:phosphatidylinositol phosphate biosynthetic process; P:inositol phosphate dephosphorylation; F:magnesium ion binding; F:inositol monophosphate 1-phosphatase activity; F:lithium ion binding; F:glycerol-2-phosphatase activity; F:inositol monophosphate 3-phosphatase activity; F:inositol monophosphate 4-phosphatase activity; C:cytosol	EC:3.1.3.19; EC:3.1.3.25	Glycerol-2-phosphatase; Inositol-phosphate phosphatase	IPR000760 (PRINTS); IPR022337 (PRINTS); G3DSA:3.40.190.80 (GENE3D); G3DSA:3.30.540.10 (GENE3D); IPR000760 (PFAM); PTHR20854 (PANTHER); PTHR20854:SF42 (PANTHER); IPR020583 (PROSITE_PATTERNS); IPR020550 (PROSITE_PATTERNS); IPR033942 (CDD); SSF56655 (SUPERFAMILY)	P:GO:0046854; P:GO:0046855; F:GO:0008934	P:phosphatidylinositol phosphate biosynthetic process; P:inositol phosphate dephosphorylation; F:inositol monophosphate 1-phosphatase activity
WP_003087527.1	MULTISPECIES: potassium-transporting ATPase subunit KdpB [Pseudomonas]	15	8	19	8	72.9	575	8	0	Yes	-1.17874	0.455579		-1.08204	0.788036		3.11066	0.0039971	Up	-12.9098	7.37553e-05	Lower	PA1634	kdpB	potassium-transporting ATPase, B chain	kdpB	-1.52893	0.936843	P	P:GO:0071805; F:GO:0000287; F:GO:0005524; F:GO:0008556; F:GO:0016887; C:GO:0005887	P:potassium ion transmembrane transport; F:magnesium ion binding; F:ATP binding; F:P-type potassium transmembrane transporter activity; F:ATP hydrolysis activity; C:integral component of plasma membrane	EC:3.6.1; EC:7.2.2.6	Acting on acid anhydrides; P-type K(+) transporter	PR00119 (PRINTS); G3DSA:2.70.150.10 (GENE3D); PF00122 (PFAM); IPR006391 (TIGRFAM); PF00702 (PFAM); IPR001757 (TIGRFAM); IPR023299 (G3DSA:3.40.1110.GENE3D); IPR023214 (G3DSA:3.40.50.GENE3D); SFLDS00003 (SFLD); IPR044492 (SFLD); IPR006391 (PANTHER); PS01229 (PROSITE_PATTERNS); IPR018303 (PROSITE_PATTERNS); IPR006391 (HAMAP); IPR036412 (SUPERFAMILY); IPR023298 (SUPERFAMILY); IPR008250 (SUPERFAMILY)	P:GO:0006813; F:GO:0000166; F:GO:0005215; F:GO:0005524; F:GO:0008556; F:GO:0016887; C:GO:0016021	P:potassium ion transport; F:nucleotide binding; F:transporter activity; F:ATP binding; F:P-type potassium transmembrane transporter activity; F:ATP hydrolysis activity; C:integral component of membrane
WP_003093751.1	MULTISPECIES: 50S ribosomal protein L11 [Pseudomonas]	62	8	83	8	14.9	2781	8	0	Yes	-1.03128	0.760914		-1.26444	0.0380358		3.10437	0.000118347	Up	-1.03308	0.630963		PA4274	rplK	50S ribosomal protein L11	rplK	2.02685	0.0162968	J	P:GO:0000027; P:GO:0006412; F:GO:0003735; F:GO:0070180	P:ribosomal large subunit assembly; P:translation; F:structural constituent of ribosome; F:large ribosomal subunit rRNA binding			IPR006519 (TIGRFAM); IPR036796 (G3DSA:3.30.1550.GENE3D); IPR036769 (G3DSA:1.10.10.GENE3D); IPR020784 (PFAM); IPR020783 (PFAM); PTHR11661:SF10 (PANTHER); IPR000911 (PANTHER); IPR020785 (PROSITE_PATTERNS); IPR000911 (HAMAP); IPR000911 (CDD); IPR036769 (SUPERFAMILY); IPR036796 (SUPERFAMILY)	P:GO:0006412; F:GO:0003735; C:GO:0005840	P:translation; F:structural constituent of ribosome; C:ribosome
WP_003088736.1	MULTISPECIES: hypothetical protein [Pseudomonas]	9	4	5	4	46.5	93	4	0	Yes	1.08966	0.564401		1.63702	0.0828905		3.08496	0.00938344	Up	-1.47831	0.137409		PA2063		hypothetical protein	PA2063	1.37444	0.135916	S					IPR029058 (G3DSA:3.40.50.GENE3D); IPR018712 (PFAM); mobidb-lite (MOBIDB_LITE); PTHR33840:SF1 (PANTHER); PTHR33840 (PANTHER); IPR029058 (SUPERFAMILY)	no GO terms	no GO terms
WP_003094797.1	MULTISPECIES: RtcB family protein [Pseudomonas]	19	7	16	7	44.4	452	7	0	Yes	1.51566	0.00213876	Up	1.17679	0.100103		3.08152	5.41215e-05	Up	2.12934	8.48374e-05	Higher	PA4583		conserved hypothetical protein	PA4583	-2.82831	1.23e-06	S	P:GO:0006266; P:GO:0006281; P:GO:0006396; P:GO:0042245; F:GO:0003909; F:GO:0008452; F:GO:0030145	P:DNA ligation; P:DNA repair; P:RNA processing; P:RNA repair; F:DNA ligase activity; F:RNA ligase activity; F:manganese ion binding	EC:6.5	Forming phosphoric ester bonds	IPR001233 (PFAM); IPR036025 (G3DSA:3.90.1860.GENE3D); PTHR43749 (PANTHER); IPR001233 (PROSITE_PATTERNS); IPR036025 (SUPERFAMILY)	P:GO:0006396; F:GO:0008452	P:RNA processing; F:RNA ligase activity
WP_003093717.1	MULTISPECIES: 30S ribosomal protein S17 [Pseudomonas]	50	5	32	5	10.1	755	5	0	Yes	1.03479	0.24427		1.0494	0.333128		3.05756	7.70189e-07	Up	-1.22122	0.0622008		PA4254	rpsQ	30S ribosomal protein S17	rpsQ	2.85661	0.00313553	J	P:GO:0000028; P:GO:0006412; P:GO:0046677; F:GO:0003735; F:GO:0070181	P:ribosomal small subunit assembly; P:translation; P:response to antibiotic; F:structural constituent of ribosome; F:small ribosomal subunit rRNA binding			IPR000266 (PRINTS); IPR000266 (PFAM); G3DSA:2.40.50.140 (GENE3D); IPR019984 (TIGRFAM); IPR000266 (PANTHER); PTHR10744:SF1 (PANTHER); IPR019984 (HAMAP); IPR012340 (SUPERFAMILY)	P:GO:0006412; F:GO:0003735; C:GO:0005840	P:translation; F:structural constituent of ribosome; C:ribosome
WP_023098679.1	MULTISPECIES: hypothetical protein [Pseudomonas]	20	3	6	3	18.6	162	3	0	Yes	1.00265	0.897054		1.02381	0.863981		3.05291	0.00457645	Up				PA1841		hypothetical protein	PA1841	1.03221	0.732581	S	P:GO:0106074; F:GO:0002161; F:GO:0004812	P:aminoacyl-tRNA metabolism involved in translational fidelity; F:aminoacyl-tRNA editing activity; F:aminoacyl-tRNA ligase activity	EC:6.1.1; EC:3.1.1.1	Forming carbon-oxygen bonds; Carboxylesterase	IPR036754 (G3DSA:3.90.960.GENE3D); IPR007214 (PFAM); PTHR31423:SF3 (PANTHER); IPR040285 (PANTHER); cd04335 (CDD); IPR036754 (SUPERFAMILY)	F:GO:0002161	F:aminoacyl-tRNA editing activity
WP_003091442.1	MULTISPECIES: 30S ribosomal protein S1 [Pseudomonas]	44	19	155	19	61.8	5111	19	0	Yes	1.05939	0.109175		-1.82967	3.71702e-05	Down	3.03737	1.42622e-05	Up	1.06998	0.324353		PA3162	rpsA	30S ribosomal protein S1	rpsA	1.02034	0.875335	J	P:GO:0000028; P:GO:2000766; F:GO:0003729; F:GO:0003735	P:ribosomal small subunit assembly; P:negative regulation of cytoplasmic translation; F:mRNA binding; F:structural constituent of ribosome			Coil (COILS); IPR035104 (PRINTS); IPR003029 (PFAM); G3DSA:2.40.50.140 (GENE3D); IPR000110 (TIGRFAM); G3DSA:2.40.50.140 (GENE3D); G3DSA:2.40.50.140 (GENE3D); PTHR10724 (PANTHER); IPR035104 (PTHR10724:PANTHER); PTHR10724 (PANTHER); IPR035104 (PTHR10724:PANTHER); IPR003029 (PROSITE_PROFILES); IPR003029 (PROSITE_PROFILES); IPR003029 (PROSITE_PROFILES); IPR003029 (PROSITE_PROFILES); IPR003029 (PROSITE…	P:GO:0006412; F:GO:0003676; F:GO:0003723; F:GO:0003735; C:GO:0005840	P:translation; F:nucleic acid binding; F:RNA binding; F:structural constituent of ribosome; C:ribosome
WP_003095215.1	MULTISPECIES: DNA repair protein RecN [Pseudomonas]	26	14	30	14	60.7	766	14	0	Yes	1.16746	0.468384		1.05359	0.888913		3.03445	0.00072541	Up	-5.41244	4.54807e-05	Lower	PA4763	recN	DNA repair protein RecN	recN	-1.54121	0.000574501	L	P:GO:0000724; P:GO:0009314; P:GO:0009432; F:GO:0005524; C:GO:0043590	P:double-strand break repair via homologous recombination; P:response to radiation; P:SOS response; F:ATP binding; C:bacterial nucleoid			Coil (COILS); Coil (COILS); IPR004604 (TIGRFAM); IPR027417 (G3DSA:3.40.50.GENE3D); IPR004604 (PIRSF); IPR003395 (PFAM); IPR004604 (PANTHER); cd03241 (CDD); cd03241 (CDD); IPR027417 (SUPERFAMILY); IPR027417 (SUPERFAMILY)	P:GO:0006281; P:GO:0006310; F:GO:0005524	P:DNA repair; P:DNA recombination; F:ATP binding
WP_003083674.1	MULTISPECIES: type VI secretion system baseplate subunit TssE [Pseudomonas]	15	3	5	3	18.6	104	3	0	Yes	1.28305	0.0543041		-1.11407	0.351218		3.03393	0.000152456	Up				PA0087	tssE1	TssE1	PA0087	2.52893	4.73e-06	S					IPR017737 (TIGRFAM); IPR007048 (PFAM); PTHR38595 (PANTHER); PTHR38595:SF1 (PANTHER); SSF160719 (SUPERFAMILY)	no GO terms	no GO terms
WP_003093703.1	MULTISPECIES: 50S ribosomal protein L5 [Pseudomonas]	58	10	74	10	20.4	1722	10	0	Yes	0.998776	0.961656		-1.09424	0.119233		3.02776	1.99126e-08	Up	-1.10531	0.0692145		PA4251	rplE	50S ribosomal protein L5	rplE	2.5964	0.00518476	J	P:GO:0000027; P:GO:0006412; F:GO:0000049; F:GO:0003735; F:GO:0008097; C:GO:0005886	P:ribosomal large subunit assembly; P:translation; F:tRNA binding; F:structural constituent of ribosome; F:5S rRNA binding; C:plasma membrane			IPR002132 (PIRSF); IPR031309 (PFAM); IPR022803 (G3DSA:3.30.1440.GENE3D); IPR031310 (PFAM); IPR002132 (PANTHER); PTHR11994:SF4 (PANTHER); IPR020929 (PROSITE_PATTERNS); IPR020930 (HAMAP); IPR022803 (SUPERFAMILY)	P:GO:0006412; F:GO:0003735; C:GO:0005840	P:translation; F:structural constituent of ribosome; C:ribosome
WP_003095044.1	MULTISPECIES: chromosome segregation ATPase [Pseudomonas]	27	26	72	26	106.8	1978	26	0	Yes	1.07526	0.139168		1.28263	0.000363436		3.01764	7.96308e-07	Up	-1.11329	0.0204952		PA4686		hypothetical protein	PA4686	1.61146	0.017118	D					Coil (COILS); Coil (COILS); Coil (COILS); Coil (COILS); Coil (COILS); Coil (COILS)	no GO terms	no GO terms
WP_003094910.1	MULTISPECIES: xanthine dehydrogenase family protein molybdopterin-binding subunit [Pseudomonas]	27	21	64	21	103.7	1700	21	0	Yes	-1.01577	0.653523		1.10092	0.0108038		3.00776	9.26121e-07	Up	-1.23571	5.3948e-05		PA4621		probable oxidoreductase	PA4621	1.39502	0.0538421	C	F:GO:0005506; F:GO:0016491	F:iron ion binding; F:oxidoreductase activity	EC:1	Oxidoreductases	G3DSA:3.30.365.10 (GENE3D); G3DSA:3.30.365.10 (GENE3D); G3DSA:3.30.365.10 (GENE3D); IPR008274 (PFAM); G3DSA:3.30.365.10 (GENE3D); IPR016208 (PANTHER); PTHR11908:SF137 (PANTHER); IPR006311 (PROSITE_PROFILES); IPR036856 (SUPERFAMILY); IPR037165 (SUPERFAMILY)	F:GO:0005506; F:GO:0016491	F:iron ion binding; F:oxidoreductase activity
WP_003094903.1	MULTISPECIES: (2Fe-2S)-binding protein [Pseudomonas]	15	3	7	3	19.9	252	3	0	Yes	-1.06569	0.584393		-1.01516	0.925021		3.00383	9.44683e-05	Up	-1.13132	0.375369		PA4620		hypothetical protein	PA4620	1.16299	0.365704	C	P:GO:0022900; F:GO:0009055; F:GO:0016903; F:GO:0018525; F:GO:0046872; F:GO:0051537	P:electron transport chain; F:electron transfer activity; F:oxidoreductase activity, acting on the aldehyde or oxo group of donors; F:4-hydroxybenzoyl-CoA reductase activity; F:metal ion binding; F:2 iron, 2 sulfur cluster binding	EC:1.3.7; EC:1.2; EC:1.1.7.1	Acting on the CH-CH group of donors; Acting on the aldehyde or oxo group of donors; 4-hydroxybenzoyl-CoA reductase	G3DSA:1.10.150.120 (GENE3D); IPR001041 (PFAM); IPR012675 (G3DSA:3.10.20.GENE3D); IPR002888 (PFAM); PTHR45331 (PANTHER); IPR001041 (PROSITE_PROFILES); IPR036010 (SUPERFAMILY); IPR036884 (SUPERFAMILY)	F:GO:0016491; F:GO:0046872; F:GO:0051536	F:oxidoreductase activity; F:metal ion binding; F:iron-sulfur cluster binding
WP_003083668.1	MULTISPECIES: type VI secretion system contractile sheath large subunit [Pseudomonas]	41	12	53	12	55.7	2209	12	0	Yes	1.28674	0.00776249		1.48835	0.00114183		2.997	4.74565e-05	Up	2.70262	0.000163338	Higher	PA0084	tssC1	TssC1	PA0084	3.52904	9.59e-07	S					IPR044032 (PFAM); IPR010269 (TIGRFAM); IPR044031 (PFAM); IPR010269 (PANTHER); PTHR35565:SF3 (PANTHER)	no GO terms	no GO terms
WP_073660265.1	MULTISPECIES: polymer-forming cytoskeletal protein [Pseudomonas]	65	6	12	6	14.8	393	6	0	Yes	-1.16282	0.0082328		-1.01649	0.71795		2.98678	5.9913e-05	Up	1.24411	0.00817209		PA0664		hypothetical protein	PA0664	-1.31783	0.00197152	M					IPR007607 (PFAM); IPR007607 (PANTHER)	no GO terms	no GO terms
WP_003092564.1	MULTISPECIES: WG repeat-containing protein [Pseudomonas]	36	13	58	13	60.3	1679	13	0	Yes	1.20527	0.000532668		-1.5181	1.75404e-06	Down	2.97533	1.70084e-08	Up				PA3716		hypothetical protein	PA3716	1.79604	3.84e-07	E					IPR032774 (PFAM); mobidb-lite (MOBIDB_LITE); mobidb-lite (MOBIDB_LITE); PTHR37841 (PANTHER); PS51257 (PROSITE_PROFILES)	no GO terms	no GO terms
WP_003093748.1	MULTISPECIES: 50S ribosomal protein L10 [Pseudomonas]	34	5	67	5	17.6	2272	5	0	Yes	-1.01879	0.467585		-1.36355	0.000204131		2.97529	1.79672e-09	Up	-1.24782	0.000737089		PA4272	rplJ	50S ribosomal protein L10	rplJ	2.64679	0.00717891	J	P:GO:0017148; P:GO:0042254; F:GO:0003735; F:GO:0043022; F:GO:0070180; C:GO:0005618; C:GO:0005886	P:negative regulation of translation; P:ribosome biogenesis; F:structural constituent of ribosome; F:ribosome binding; F:large ribosomal subunit rRNA binding; C:cell wall; C:plasma membrane			G3DSA:6.10.250.2350 (GENE3D); IPR001790 (PFAM); IPR043141 (G3DSA:3.30.70.GENE3D); IPR001790 (PANTHER); PTHR11560:SF8 (PANTHER); IPR002363 (PROSITE_PATTERNS); IPR022973 (HAMAP); IPR001790 (CDD); IPR043141 (SUPERFAMILY)	P:GO:0006412; F:GO:0003735; C:GO:0015934	P:translation; F:structural constituent of ribosome; C:large ribosomal subunit
WP_003100244.1	MULTISPECIES: tRNA uridine-5-carboxymethylaminomethyl(34) synthesis enzyme MnmG [Pseudomonas]	18	10	11	10	69.6	273	10	0	Yes	1.29672	0.0257205		-1.71546	0.00074513	Down	2.96562	1.59793e-05	Up	1.03254	0.725342		PA5565	gidA	glucose-inhibited division protein A	gidA	-1.71396	2.56e-06	D	P:GO:0002098; P:GO:0009411; P:GO:0030488; F:GO:0050660; C:GO:0005829	P:tRNA wobble uridine modification; P:response to UV; P:tRNA methylation; F:flavin adenine dinucleotide binding; C:cytosol			PR00368 (PRINTS); IPR044920 (G3DSA:1.10.150.GENE3D); IPR026904 (PFAM); IPR004416 (TIGRFAM); G3DSA:1.10.10.1800 (GENE3D); IPR040131 (PFAM); IPR036188 (G3DSA:3.50.50.GENE3D); IPR002218 (PANTHER); IPR004416 (PTHR11806:PANTHER); IPR020595 (PROSITE_PATTERNS); IPR020595 (PROSITE_PATTERNS); IPR004416 (HAMAP); IPR036188 (SUPERFAMILY)	P:GO:0002098; P:GO:0008033; F:GO:0050660	P:tRNA wobble uridine modification; P:tRNA processing; F:flavin adenine dinucleotide binding
WP_003090544.1	MULTISPECIES: RHS repeat protein [Pseudomonas]	20	24	46	24	145.8	1167	24	0	Yes	1.15655	0.0551133		1.63265	1.00754e-05	Up	2.94291	4.79831e-06	Up	1.67721	0.00099207	Higher	PA2684	tse5	Tse5	PA2684	2.52368	3.69e-06	M					Coil (COILS); IPR001826 (PRINTS); IPR031325 (PFAM); IPR006530 (TIGRFAM); IPR045351 (PFAM); G3DSA:2.180.10.10 (GENE3D); IPR022385 (TIGRFAM); IPR001826 (PFAM); G3DSA:2.180.10.10 (GENE3D); mobidb-lite (MOBIDB_LITE); PTHR32305 (PANTHER); PTHR32305:SF15 (PANTHER); SSF69304 (SUPERFAMILY)	no GO terms	no GO terms
WP_123822971.1	hypothetical protein [Pseudomonas aeruginosa]	33	5	10	5	18.2	310	5	0	Yes	-1.08565	0.48838		1.39383	0.0203686		2.92173	0.000163824	Up											F:GO:0003677	F:DNA binding			IPR010982 (SUPERFAMILY)	F:GO:0003677	F:DNA binding
WP_003096440.1	MULTISPECIES: transcriptional regulator SutA [Pseudomonas]	34	3	14	3	11.2	322	3	0	Yes	1.16353	0.353096		-1.35836	0.0201639		2.90655	0.000273436	Up	1.23158	0.33562		PA5285	sutA	SutA	PA5285	1.8097	5.9e-05						Coil (COILS); mobidb-lite (MOBIDB_LITE); mobidb-lite (MOBIDB_LITE); mobidb-lite (MOBIDB_LITE); mobidb-lite (MOBIDB_LITE)	no GO terms	no GO terms
WP_003093714.1	MULTISPECIES: 50S ribosomal protein L14 [Pseudomonas]	62	9	82	9	13.4	2364	9	0	Yes	1.00218	0.947824		1.00218	0.99671		2.90366	0.00014857	Up	-1.2245	0.176574		PA4253	rplN	50S ribosomal protein L14	rplN	2.79427	0.00617426	J	P:GO:0006412; F:GO:0003735; F:GO:0070180; C:GO:0005886	P:translation; F:structural constituent of ribosome; F:large ribosomal subunit rRNA binding; C:plasma membrane			IPR000218 (PFAM); IPR036853 (G3DSA:2.40.150.GENE3D); IPR005745 (TIGRFAM); IPR000218 (PANTHER); PTHR11761:SF3 (PANTHER); IPR019972 (PROSITE_PATTERNS); IPR000218 (HAMAP); IPR036853 (SUPERFAMILY)	P:GO:0006412; F:GO:0003735; C:GO:0005840; C:GO:0015934	P:translation; F:structural constituent of ribosome; C:ribosome; C:large ribosomal subunit
WP_003091284.1	MULTISPECIES: DUF3492 domain-containing protein [Pseudomonas]	11	5	9	5	56.6	274	5	0	Yes	1.4147	0.0306418		1.31982	0.0495648		2.89947	0.000829792	Up	1.14455	0.280278		PA3059	pelF	PelF	pelF	-1.29057	0.0786852	M	P:GO:0044010; P:GO:0045226; F:GO:0102710	P:single-species biofilm formation; P:extracellular polysaccharide biosynthetic process; F:D-inositol-3-phosphate glycosyltransferase activity	EC:2.4.1.250	D-inositol-3-phosphate glycosyltransferase	G3DSA:3.40.50.2000 (GENE3D); G3DSA:3.40.50.2000 (GENE3D); IPR022622 (PFAM); PF13692 (PFAM); PTHR12526:SF575 (PANTHER); PTHR12526 (PANTHER); cd03813 (CDD); SSF53756 (SUPERFAMILY)	no GO terms	no GO terms
WP_003095041.1	MULTISPECIES: hypothetical protein [Pseudomonas]	23	4	7	4	26.3	282	4	0	Yes	1.1941	0.0269581		-1.21426	0.0187817		2.88836	2.55881e-07	Up	1.28298	0.0262328		PA4685		hypothetical protein	PA4685	-1.06417	0.550871	S					IPR042038 (G3DSA:1.10.10.GENE3D); mobidb-lite (MOBIDB_LITE); mobidb-lite (MOBIDB_LITE)	no GO terms	no GO terms
WP_078463498.1	ATP-binding protein [Pseudomonas aeruginosa]	29	6	15	6	27.8	519	6	0	Yes	1.00791	0.864608		1.21679	0.0228607		2.88393	5.75148e-06	Up										S					IPR003593 (PFAM); IPR027417 (G3DSA:3.40.50.GENE3D); PTHR35894:SF6 (PANTHER); PTHR35894 (PANTHER); IPR027417 (SUPERFAMILY)	no GO terms	no GO terms
WP_003158916.1	MULTISPECIES: DUF2130 domain-containing protein [Proteobacteria]	42	9	18	9	26.2	493	9	0	Yes	1.10553	0.120178		-1.35167	0.0493007		2.87235	3.53319e-05	Up										S					Coil (COILS); Coil (COILS); Coil (COILS); Coil (COILS); Coil (COILS); IPR019219 (PFAM)	no GO terms	no GO terms
WP_003095013.1	MULTISPECIES: 50S ribosomal protein L25/general stress protein Ctc [Pseudomonas]	57	8	33	8	22	917	8	0	Yes	-1.08002	0.559866		-1.14743	0.278087		2.86435	0.000184491	Up	1.22867	0.142859		PA4671		probable ribosomal protein L25	PA4671	1.99352	0.0209311	J	P:GO:0006412; F:GO:0003735; F:GO:0008097	P:translation; F:structural constituent of ribosome; F:5S rRNA binding			IPR020057 (PFAM); IPR037121 (G3DSA:2.170.120.GENE3D); IPR029751 (PFAM); IPR020056 (G3DSA:2.40.240.GENE3D); IPR001021 (TIGRFAM); PTHR33284 (PANTHER); PTHR33284:SF1 (PANTHER); IPR001021 (HAMAP); IPR029751 (CDD); IPR011035 (SUPERFAMILY)	P:GO:0006412; F:GO:0003735; F:GO:0008097; C:GO:0005840	P:translation; F:structural constituent of ribosome; F:5S rRNA binding; C:ribosome
WP_003087820.1	MULTISPECIES: alpha/beta fold hydrolase [Pseudomonas]	20	5	10	5	36.9	340	5	0	Yes	-1.04493	0.938601		-1.07571	0.969803		2.84427	0.00684579	Up	1.70652	0.115194		PA1771	estX	EstX	estX	-1.36114	0.0173032	S	F:GO:0016787	F:hydrolase activity	EC:3	Hydrolases	IPR029058 (G3DSA:3.40.50.GENE3D); IPR029058 (G3DSA:3.40.50.GENE3D); IPR000073 (PFAM); PTHR11005 (PANTHER); IPR029058 (SUPERFAMILY)	no GO terms	no GO terms
WP_003085057.1	MULTISPECIES: 30S ribosomal protein S21 [Pseudomonadaceae]	39	3	10	3	8.5	180	3	0	Yes	1.18529	0.425179		-1.56655	0.0665779		2.8422	0.00326653	Up	1.00719	0.898337		PA0579	rpsU	30S ribosomal protein S21	rpsU	-1.16901	0.0386227	J	P:GO:0000028; P:GO:0006412; F:GO:0003735	P:ribosomal small subunit assembly; P:translation; F:structural constituent of ribosome			Coil (COILS); IPR001911 (PRINTS); IPR038380 (G3DSA:1.20.5.GENE3D); IPR001911 (PFAM); IPR001911 (TIGRFAM); mobidb-lite (MOBIDB_LITE); mobidb-lite (MOBIDB_LITE); IPR001911 (PANTHER); PTHR21109:SF15 (PANTHER); IPR018278 (PROSITE_PATTERNS); IPR001911 (HAMAP)	P:GO:0006412; F:GO:0003735; C:GO:0005840	P:translation; F:structural constituent of ribosome; C:ribosome
WP_003090558.1	MULTISPECIES: DUF1615 domain-containing protein [Pseudomonas]	17	5	8	5	40.1	170	5	0	Yes	1.02439	0.750468		-2.0297	0.000412296	Down	2.83642	2.40382e-05	Up	15.375	0.00910146	Higher	PA2695		conserved hypothetical protein	PA2695	1.03186	0.768939	S	P:GO:1901652; C:GO:0005829; C:GO:0031240	P:response to peptide; C:cytosol; C:external side of cell outer membrane			IPR011673 (PFAM); PS51257 (PROSITE_PROFILES)	no GO terms	no GO terms
WP_003097818.1	MULTISPECIES: PLP-dependent aminotransferase family protein [Pseudomonas]	9	4	9	4	43.3	151	4	0	Yes	-1.10915	0.390865		1.17038	0.138872		2.83329	0.000115959	Up	-1.05312	0.62625		PA1654		probable aminotransferase	PA1654	-1.26656	0.0601443	EK	P:GO:0009058; F:GO:0030170; F:GO:0047536	P:biosynthetic process; F:pyridoxal phosphate binding; F:2-aminoadipate transaminase activity	EC:2.6.1.39	2-aminoadipate transaminase	IPR015422 (G3DSA:3.90.1150.GENE3D); IPR015421 (G3DSA:3.40.640.GENE3D); IPR004839 (PFAM); PTHR42790 (PANTHER); PTHR42790:SF3 (PANTHER); cd00609 (CDD); IPR015424 (SUPERFAMILY)	P:GO:0009058; F:GO:0003824; F:GO:0030170	P:biosynthetic process; F:catalytic activity; F:pyridoxal phosphate binding
WP_003092393.1	MULTISPECIES: elongation factor Ts [Pseudomonas]	65	16	150	16	30.6	4193	16	0	Yes	1.18081	0.00959435		-1.2348	0.00590314		2.83319	2.25884e-05	Up	-1.39516	0.000284736		PA3655	tsf	elongation factor Ts	tsf	2.10097	0.0103323	J	P:GO:0006414; P:GO:0065009; F:GO:0003746; F:GO:0005085; F:GO:0008270; F:GO:0051020; F:GO:2001065; C:GO:0005829	P:translational elongation; P:regulation of molecular function; F:translation elongation factor activity; F:guanyl-nucleotide exchange factor activity; F:zinc ion binding; F:GTPase binding; F:mannan binding; C:cytosol			G3DSA:1.10.8.10 (GENE3D); IPR036402 (G3DSA:3.30.479.GENE3D); IPR014039 (PFAM); IPR001816 (TIGRFAM); IPR036402 (G3DSA:3.30.479.GENE3D); G3DSA:1.10.286.20 (GENE3D); PTHR11741:SF0 (PANTHER); IPR001816 (PANTHER); IPR018101 (PROSITE_PATTERNS); IPR018101 (PROSITE_PATTERNS); IPR001816 (HAMAP); cd14275 (CDD); IPR036402 (SUPERFAMILY); IPR009060 (SUPERFAMILY); IPR036402 (SUPERFAMILY)	P:GO:0006414; F:GO:0003746; F:GO:0005515	P:translational elongation; F:translation elongation factor activity; F:protein binding
WP_003093893.1	MULTISPECIES: stage II sporulation protein M [Pseudomonas]	6	2	3	2	36.4	105	2	0	Yes	1.17705	0.073899		1.04725	0.607591		2.81672	0.000104378	Up	1.1283	0.353872		PA4319		conserved hypothetical protein	PA4319	1.26231	0.0199861	S	C:GO:0016021	C:integral component of membrane			IPR002798 (PFAM); PTHR35337 (PANTHER)	no GO terms	no GO terms
WP_003097265.1	MULTISPECIES: DNA replication/repair protein RecF [Pseudomonas]	15	6	19	6	41.4	303	6	0	Yes	1.50898	0.0523999	Up	1.86838	0.0138191	Up	2.81593	0.00478556	Up	-1.82759	0.0188647	Lower	PA0003	recF	RecF protein	recF	1.14803	0.427752	L	P:GO:0000731; P:GO:0006260; P:GO:0006302; P:GO:0009411; P:GO:0009432; F:GO:0003697; F:GO:0005524; C:GO:0005829; C:GO:0005886	P:DNA synthesis involved in DNA repair; P:DNA replication; P:double-strand break repair; P:response to UV; P:SOS response; F:single-stranded DNA binding; F:ATP binding; C:cytosol; C:plasma membrane			IPR001238 (TIGRFAM); IPR003395 (PFAM); IPR027417 (G3DSA:3.40.50.GENE3D); IPR042174 (G3DSA:1.20.1050.GENE3D); PTHR32182 (PANTHER); IPR001238 (PTHR32182:PANTHER); IPR018078 (PROSITE_PATTERNS); IPR018078 (PROSITE_PATTERNS); IPR001238 (HAMAP); IPR027417 (SUPERFAMILY)	P:GO:0006281; F:GO:0003697; F:GO:0005524	P:DNA repair; F:single-stranded DNA binding; F:ATP binding
WP_003085844.1	MULTISPECIES: thioredoxin-disulfide reductase [Pseudomonas]	20	4	5	4	33.5	232	4	0	Yes	1.01504	0.747745		1.67254	0.00010441	Up	2.80634	2.45464e-06	Up	1.63732	0.0882282		PA0849	trxB2	thioredoxin reductase 2	trxB2	1.04452	0.639265	C	P:GO:0019430; F:GO:0004791; F:GO:0016829; C:GO:0005737	P:removal of superoxide radicals; F:thioredoxin-disulfide reductase activity; F:lyase activity; C:cytoplasm	EC:4; EC:1.8.1.9; EC:1.8.1.8	Lyases; Thioredoxin-disulfide reductase; Protein-disulfide reductase	PR00469 (PRINTS); PR00368 (PRINTS); IPR036188 (G3DSA:3.50.50.GENE3D); IPR023753 (PFAM); IPR036188 (G3DSA:3.50.50.GENE3D); IPR005982 (TIGRFAM); PTHR48105 (PANTHER); PTHR48105:SF16 (PANTHER); IPR008255 (PROSITE_PATTERNS); IPR036188 (SUPERFAMILY)	P:GO:0019430; F:GO:0004791; F:GO:0016491; C:GO:0005737	P:removal of superoxide radicals; F:thioredoxin-disulfide reductase activity; F:oxidoreductase activity; C:cytoplasm
WP_003095850.1	MULTISPECIES: SPOR domain-containing protein [Pseudomonas]	30	6	15	6	25.1	201	6	0	Yes	1.23191	0.0014472		-1.30596	0.0236162		2.80546	1.62615e-05	Up	1.14266	0.158952		PA5052		hypothetical protein	PA5052	-1.03658	0.632282	D	P:GO:0051301; F:GO:0042834; C:GO:0016021	P:cell division; F:peptidoglycan binding; C:integral component of membrane			IPR036680 (G3DSA:3.30.70.GENE3D); IPR007730 (PFAM); mobidb-lite (MOBIDB_LITE); mobidb-lite (MOBIDB_LITE); PTHR34183 (PANTHER); PTHR34183:SF9 (PANTHER); IPR007730 (PROSITE_PROFILES); IPR036680 (SUPERFAMILY)	F:GO:0042834	F:peptidoglycan binding
WP_034065816.1	peptide chain release factor 3 [Pseudomonas aeruginosa]	22	12	32	12	59.9	535	12	0	Yes	1.25079	0.0401956		1.30915	0.0201191		2.79968	0.000395607	Up	-2.7755	0.00020345	Lower	PA3903	prfC	peptide chain release factor 3	prfC	-1.38367	0.00519717	J	P:GO:0006449; F:GO:0003924; F:GO:0005525; F:GO:0016149; F:GO:0016150; F:GO:0019003; F:GO:0032550; C:GO:0005829	P:regulation of translational termination; F:GTPase activity; F:GTP binding; F:translation release factor activity, codon specific; F:translation release factor activity, codon nonspecific; F:GDP binding; F:purine ribonucleoside binding; C:cytosol	EC:3.6.1	Acting on acid anhydrides	IPR000795 (PRINTS); IPR038467 (G3DSA:3.30.70.GENE3D); IPR027417 (G3DSA:3.40.50.GENE3D); IPR004548 (TIGRFAM); IPR000795 (PFAM); IPR027417 (G3DSA:3.40.50.GENE3D); IPR032090 (PFAM); IPR005225 (TIGRFAM); IPR004161 (PFAM); IPR004548 (PANTHER); IPR031157 (PROSITE_PATTERNS); IPR000795 (PROSITE_PROFILES); IPR004548 (HAMAP); cd03689 (CDD); IPR041732 (CDD); cd16259 (CDD); IPR009000 (SUPERFAMILY); IPR035647…	P:GO:0006415; F:GO:0003924; F:GO:0005525; C:GO:0005737	P:translational termination; F:GTPase activity; F:GTP binding; C:cytoplasm
WP_023098865.1	RHS repeat protein [Pseudomonas aeruginosa]	7	3	4	2	42.7	105	3	0	Yes	-1.19808	0.498004		-1.10263	0.726737		2.79904	0.0094053	Up										M					IPR031325 (PFAM); G3DSA:2.180.10.10 (GENE3D); IPR006530 (TIGRFAM); IPR045351 (PFAM); mobidb-lite (MOBIDB_LITE); mobidb-lite (MOBIDB_LITE)	no GO terms	no GO terms
WP_071533941.1	MULTISPECIES: rod shape-determining protein MreC [Pseudomonas]	29	9	23	9	36.9	726	9	0	Yes	1.15205	0.312037		-1.12131	0.00481332		2.7924	1.52161e-05	Up										M	P:GO:0051128; P:GO:0071963; F:GO:0043621; C:GO:0005886; C:GO:0030428	P:regulation of cellular component organization; P:establishment or maintenance of cell polarity regulating cell shape; F:protein self-association; C:plasma membrane; C:cell septum			IPR007221 (PFAM); IPR007221 (TIGRFAM); IPR042177 (G3DSA:2.40.10.GENE3D); IPR042175 (G3DSA:2.40.10.GENE3D); IPR007221 (PIRSF); mobidb-lite (MOBIDB_LITE); mobidb-lite (MOBIDB_LITE); IPR007221 (PANTHER)	P:GO:0008360	P:regulation of cell shape
WP_003093432.1	MULTISPECIES: LOG family protein [Pseudomonas]	36	15	26	15	51.1	380	15	0	Yes	1.00981	0.817862		-1.37517	7.09478e-05		2.78803	0.000702841	Up	2.23956	0.00934084	Higher	PA4115		conserved hypothetical protein	PA4115	1.10983	0.678506	S	F:GO:0047405; C:GO:0005829	F:pyrimidine-5'-nucleotide nucleosidase activity; C:cytosol	EC:3.2.2.10	Pyrimidine-5'-nucleotide nucleosidase	IPR037153 (G3DSA:3.30.1850.GENE3D); IPR021826 (PFAM); IPR031100 (PFAM); G3DSA:3.40.50.450 (GENE3D); IPR027820 (PFAM); PTHR43393 (PANTHER); PTHR43393:SF1 (PANTHER); SSF102405 (SUPERFAMILY)	no GO terms	no GO terms
WP_003094769.1	MULTISPECIES: FKBP-type peptidyl-prolyl cis-trans isomerase [Pseudomonas]	40	7	27	7	21.8	1057	7	0	Yes	1.09034	0.245655		-1.22582	0.00230364		2.77436	9.32515e-06	Up	-1.42722	0.000388012		PA4572	fklB	peptidyl-prolyl cis-trans isomerase FklB	fklB	1.06703	0.749309	G	P:GO:0000413; P:GO:0006457; F:GO:0003755; F:GO:0005528; F:GO:0042802; C:GO:0005829	P:protein peptidyl-prolyl isomerization; P:protein folding; F:peptidyl-prolyl cis-trans isomerase activity; F:FK506 binding; F:identical protein binding; C:cytosol	EC:5.2.1.8	Peptidylprolyl isomerase	G3DSA:3.10.50.40 (GENE3D); IPR001179 (PFAM); IPR036944 (G3DSA:1.10.287.GENE3D); IPR000774 (PFAM); PTHR43811:SF23 (PANTHER); PTHR43811 (PANTHER); IPR001179 (PROSITE_PROFILES); SSF54534 (SUPERFAMILY)	P:GO:0006457; F:GO:0003755	P:protein folding; F:peptidyl-prolyl cis-trans isomerase activity
WP_003090941.1	MULTISPECIES: organic hydroperoxide resistance protein [Pseudomonas]	25	3	10	3	14.5	499	3	0	Yes	1.07311	0.16492		1.0188	0.651249		2.77285	4.59799e-06	Up				PA2850	ohr	organic hydroperoxide resistance protein	ohr	-1.8452	0.00394236	O	P:GO:0006979	P:response to oxidative stress			IPR019953 (TIGRFAM); IPR003718 (PFAM); G3DSA:2.20.25.10 (GENE3D); IPR015946 (G3DSA:3.30.300.GENE3D); IPR019953 (PANTHER); IPR036102 (SUPERFAMILY)	P:GO:0006979	P:response to oxidative stress
WP_003089831.1	MULTISPECIES: multidrug efflux RND transporter periplasmic adaptor subunit MexE [Pseudomonas]	9	4	6	4	45.1	163	4	0	Yes	-1.18892	0.148293		-1.39608	0.0119302		2.76354	0.00538165	Up	-1.07355	0.627072		PA2493	mexE	Resistance-Nodulation-Cell Division (RND) multidrug efflux membrane fusion protein MexE precursor	mexE	-1.56024	0.0141931	M	P:GO:0055085; F:GO:0022857; C:GO:0016020	P:transmembrane transport; F:transmembrane transporter activity; C:membrane	EC:7	Translocases	Coil (COILS); Coil (COILS); G3DSA:2.40.420.20 (GENE3D); G3DSA:2.40.30.170 (GENE3D); G3DSA:1.10.287.470 (GENE3D); IPR006143 (TIGRFAM); IPR032317 (PFAM); G3DSA:2.40.50.100 (GENE3D); mobidb-lite (MOBIDB_LITE); PTHR30158 (PANTHER); PTHR30158:SF10 (PANTHER); SSF111369 (SUPERFAMILY)	P:GO:0055085; F:GO:0022857; C:GO:0016020	P:transmembrane transport; F:transmembrane transporter activity; C:membrane
WP_003093896.1	MULTISPECIES: MoxR family ATPase [Pseudomonas]	29	8	32	8	36.6	1015	8	0	Yes	1.04552	0.197801		1.08736	0.0479536		2.75657	7.54013e-06	Up	-1.11139	0.0241645		PA4322		conserved hypothetical protein	PA4322	1.81051	0.00447163	S	F:GO:0005524; F:GO:0016887	F:ATP binding; F:ATP hydrolysis activity	EC:3.6.1	Acting on acid anhydrides	PIRSF002849 (PIRSF); IPR027417 (G3DSA:3.40.50.GENE3D); IPR011703 (PFAM); IPR041628 (PFAM); G3DSA:1.10.8.80 (GENE3D); mobidb-lite (MOBIDB_LITE); PTHR11603 (PANTHER); PTHR11603:SF132 (PANTHER); cd00009 (CDD); IPR027417 (SUPERFAMILY)	F:GO:0005524; F:GO:0016887	F:ATP binding; F:ATP hydrolysis activity
WP_003158917.1	MULTISPECIES: mercury(II) reductase [Bacteria]	19	9	14	6	58.7	492	9	1	Yes	1.05181	0.435274		1.31844	0.00479181		2.74741	1.15409e-05	Up										H	P:GO:0022900; P:GO:0030001; P:GO:0032259; P:GO:0045454; P:GO:0050787; F:GO:0008168; F:GO:0009055; F:GO:0016152; F:GO:0016668; F:GO:0016787; F:GO:0045340; F:GO:0050660; F:GO:0050661	P:electron transport chain; P:metal ion transport; P:methylation; P:cell redox homeostasis; P:detoxification of mercury ion; F:methyltransferase activity; F:electron transfer activity; F:mercury (II) reductase activity; F:oxidoreductase activity, acting on a sulfur group of donors, NAD(P) as acceptor; F:hydrolase activity; F:mercury ion binding; F:flavin adenine dinucleotide binding; F:NADP bindi…	EC:1.8.1; EC:1.16.1.1; EC:3; EC:2.1.1	Acting on a sulfur group of donors; Mercury(II) reductase; Hydrolases; Transferring one-carbon groups	PR00945 (PRINTS); IPR036188 (G3DSA:3.50.50.GENE3D); IPR001100 (PIRSF); IPR006121 (PFAM); IPR004099 (PFAM); G3DSA:3.30.70.100 (GENE3D); IPR021179 (TIGRFAM); IPR016156 (G3DSA:3.30.390.GENE3D); IPR023753 (PFAM); IPR036188 (G3DSA:3.50.50.GENE3D); PTHR43014:SF2 (PANTHER); PTHR43014 (PANTHER); IPR012999 (PROSITE_PATTERNS); IPR017969 (PROSITE_PATTERNS); IPR006121 (PROSITE_PROFILES); IPR006121 (CDD); IPR…	P:GO:0045454; P:GO:0050787; F:GO:0016152; F:GO:0016491; F:GO:0016668; F:GO:0045340; F:GO:0046872; F:GO:0050660; F:GO:0050661	P:cell redox homeostasis; P:detoxification of mercury ion; F:mercury (II) reductase activity; F:oxidoreductase activity; F:oxidoreductase activity, acting on a sulfur group of donors, NAD(P) as acceptor; F:mercury ion binding; F:metal ion binding; F:flavin adenine dinucleotide binding; F:NADP binding
WP_003095186.1	MULTISPECIES: tRNA pseudouridine(55) synthase TruB [Pseudomonas]	26	8	20	8	33.4	577	8	0	Yes	1.17738	0.0224292		-1.13074	0.106147		2.74606	0.000320285	Up	1.03354	0.560767		PA4742	truB	tRNA pseudouridine 55 synthase	truB	-1.05209	0.758866	J	P:GO:0031119; P:GO:0034337; P:GO:1990481; F:GO:0000049; F:GO:0106029; C:GO:0005829	P:tRNA pseudouridine synthesis; P:RNA folding; P:mRNA pseudouridine synthesis; F:tRNA binding; F:tRNA pseudouridine synthase activity; C:cytosol	EC:5.4.99.12; EC:5.4.99.45; EC:5.4.99.26; EC:5.4.99.25; EC:5.4.99.28; EC:5.4.99.27; EC:5.4.99.42; EC:5.4.99.44	tRNA pseudouridine(38-40) synthase; tRNA pseudouridine(38/39) synthase; tRNA pseudouridine(65) synthase; tRNA pseudouridine(55) synthase; tRNA pseudouridine(32) synthase; tRNA pseudouridine(13) synthase; tRNA pseudouridine(31) synthase; Mitochondrial tRNA pseudouridine(27/28) synthase	IPR015240 (PFAM); IPR032819 (PFAM); IPR014780 (TIGRFAM); IPR036974 (G3DSA:2.30.130.GENE3D); IPR002501 (PFAM); G3DSA:3.30.2350.10 (GENE3D); IPR014780 (PANTHER); IPR014780 (HAMAP); IPR014780 (CDD); IPR020103 (SUPERFAMILY); IPR015947 (SUPERFAMILY)	P:GO:0001522; P:GO:0006396; P:GO:0009451; F:GO:0003723; F:GO:0009982	P:pseudouridine synthesis; P:RNA processing; P:RNA modification; F:RNA binding; F:pseudouridine synthase activity
WP_003082358.1	MULTISPECIES: ribonucleoside-diphosphate reductase subunit alpha [Pseudomonas]	38	30	141	30	107	4350	30	0	Yes	1.05991	0.143128		1.8625	2.44779e-06	Up	2.73872	4.75848e-06	Up	1.36502	0.000371586		PA1156	nrdA	NrdA, catalytic component of class Ia ribonucleotide reductase	nrdA	-1.03716	0.818988	F	P:GO:0006260; P:GO:0009263; F:GO:0004748; F:GO:0005524; F:GO:0042802; C:GO:0005971	P:DNA replication; P:deoxyribonucleotide biosynthetic process; F:ribonucleoside-diphosphate reductase activity, thioredoxin disulfide as acceptor; F:ATP binding; F:identical protein binding; C:ribonucleoside-diphosphate reductase complex	EC:1.17.4.1	Ribonucleoside-diphosphate reductase	IPR000788 (PRINTS); IPR005144 (PFAM); IPR013346 (TIGRFAM); IPR000788 (PFAM); G3DSA:3.20.70.20 (GENE3D); IPR013509 (PFAM); mobidb-lite (MOBIDB_LITE); mobidb-lite (MOBIDB_LITE); PTHR11573:SF6 (PANTHER); IPR039718 (PANTHER); IPR000788 (PROSITE_PATTERNS); IPR005144 (PROSITE_PROFILES); IPR005144 (PROSITE_PROFILES); cd01679 (CDD); IPR008926 (SUPERFAMILY); SSF51998 (SUPERFAMILY)	P:GO:0006260; F:GO:0004748; F:GO:0005524	P:DNA replication; F:ribonucleoside-diphosphate reductase activity, thioredoxin disulfide as acceptor; F:ATP binding
WP_003094350.1	MULTISPECIES: HAD family hydrolase [Pseudomonas]	33	5	13	5	19.4	231	5	0	Yes	-1.0638	0.807087		1.06588	0.655009		2.711	0.00353923	Up				PA4458		conserved hypothetical protein	PA4458	1.02846	0.661318	S	P:GO:0009103; P:GO:0016311; F:GO:0019143; F:GO:0046872	P:lipopolysaccharide biosynthetic process; P:dephosphorylation; F:3-deoxy-manno-octulosonate-8-phosphatase activity; F:metal ion binding	EC:3.1.3.45	3-deoxy-manno-octulosonate-8-phosphatase	IPR023214 (G3DSA:3.40.50.GENE3D); IPR010023 (PIRSF); PF08282 (PFAM); IPR010023 (TIGRFAM); SFLDF00036 (SFLD); SFLDS00003 (SFLD); PTHR21485:SF5 (PANTHER); PTHR21485 (PANTHER); cd01630 (CDD); IPR036412 (SUPERFAMILY)	F:GO:0016788	F:hydrolase activity, acting on ester bonds
WP_003093299.1	MULTISPECIES: GTP cyclohydrolase II [Pseudomonas]	26	4	11	4	22.1	305	4	0	Yes	1.04876	0.468645		-1.11737	0.197241		2.70059	0.000313054	Up	1.03453	0.701177		PA4047	ribA	GTP cyclohydrolase II	ribA	-1.34074	0.00152484	H	P:GO:0006805; P:GO:0009231; P:GO:1901135; F:GO:0003935; F:GO:0005525; F:GO:0008270; F:GO:0016799; C:GO:0005829	P:xenobiotic metabolic process; P:riboflavin biosynthetic process; P:carbohydrate derivative metabolic process; F:GTP cyclohydrolase II activity; F:GTP binding; F:zinc ion binding; F:hydrolase activity, hydrolyzing N-glycosyl compounds; C:cytosol	EC:3.5.4.25; EC:3.2.2	GTP cyclohydrolase II; Glycosylases	IPR000926 (TIGRFAM); IPR032677 (PFAM); IPR036144 (G3DSA:3.40.50.GENE3D); PTHR21327 (PANTHER); IPR000926 (HAMAP); IPR000926 (CDD); IPR036144 (SUPERFAMILY)	P:GO:0009231; F:GO:0003935	P:riboflavin biosynthetic process; F:GTP cyclohydrolase II activity
WP_003098578.1	MULTISPECIES: DNA polymerase III subunit alpha [Pseudomonas]	35	39	99	39	130.8	2307	39	0	Yes	1.28261	0.00234214		1.44288	0.00108989		2.69949	1.66527e-05	Up	-1.27067	0.00268662		PA3640	dnaE	DNA polymerase III, alpha chain	dnaE	-1.5252	0.000968097	L	P:GO:0006260; P:GO:0071897; P:GO:0090305; F:GO:0003676; F:GO:0003887; F:GO:0008408; C:GO:0005829; C:GO:0044776	P:DNA replication; P:DNA biosynthetic process; P:nucleic acid phosphodiester bond hydrolysis; F:nucleic acid binding; F:DNA-directed DNA polymerase activity; F:3'-5' exonuclease activity; C:cytosol; C:DNA polymerase III, core complex	EC:3.1; EC:2.7.7.7	Acting on ester bonds; DNA-directed DNA polymerase	IPR004805 (TIGRFAM); IPR011708 (PFAM); G3DSA:2.40.50.140 (GENE3D); IPR004013 (PFAM); IPR041931 (G3DSA:1.10.10.GENE3D); IPR004365 (PFAM); IPR029460 (PFAM); G3DSA:3.20.20.140 (GENE3D); G3DSA:1.10.150.870 (GENE3D); IPR040982 (PFAM); PTHR32294:SF0 (PANTHER); IPR004805 (PANTHER); cd07433 (CDD); cd04485 (CDD); IPR016195 (SUPERFAMILY)	P:GO:0006260; F:GO:0003676; F:GO:0003824; F:GO:0008408	P:DNA replication; F:nucleic acid binding; F:catalytic activity; F:3'-5' exonuclease activity
WP_003095017.1	MULTISPECIES: redox-regulated ATPase YchF [Pseudomonas]	36	11	36	11	40.1	727	11	0	Yes	1.15967	0.0630308		1.0638	0.557186		2.69533	1.25817e-05	Up	-1.16752	0.057675		PA4673		conserved hypothetical protein	PA4673	-1.0274	0.907301	J	P:GO:0006979; P:GO:0043086; F:GO:0004857; F:GO:0005524; F:GO:0005525; F:GO:0016887; F:GO:0043022; F:GO:0043023; C:GO:0005737	P:response to oxidative stress; P:negative regulation of catalytic activity; F:enzyme inhibitor activity; F:ATP binding; F:GTP binding; F:ATP hydrolysis activity; F:ribosome binding; F:ribosomal large subunit binding; C:cytoplasm	EC:3.6.1	Acting on acid anhydrides	IPR006073 (PRINTS); IPR006073 (PFAM); IPR013029 (PFAM); IPR023192 (G3DSA:1.10.150.GENE3D); IPR027417 (G3DSA:3.40.50.GENE3D); IPR004396 (PIRSF); IPR012675 (G3DSA:3.10.20.GENE3D); IPR004396 (TIGRFAM); PTHR23305 (PANTHER); PTHR23305:SF18 (PANTHER); IPR031167 (PROSITE_PROFILES); IPR004095 (PROSITE_PROFILES); IPR004396 (HAMAP); IPR013029 (CDD); IPR041706 (CDD); IPR012676 (SUPERFAMILY); IPR027417 (SUPE…	F:GO:0005524; F:GO:0005525; F:GO:0016887	F:ATP binding; F:GTP binding; F:ATP hydrolysis activity
WP_034085220.1	type VI secretion system ATPase TssH [Pseudomonas aeruginosa]	48	34	151	33	98.6	4185	34	0	Yes	1.34883	0.000527602		1.55171	1.21023e-06	Up	2.68975	1.38461e-08	Up	2.18094	9.74371e-05	Higher	PA0090	clpV1	ClpV1	clpV1	3.56148	5.89e-09	O	P:GO:0019538; F:GO:0005524; F:GO:0016887	P:protein metabolic process; F:ATP binding; F:ATP hydrolysis activity	EC:3.6.1	Acting on acid anhydrides	Coil (COILS); Coil (COILS); Coil (COILS); IPR001270 (PRINTS); IPR036628 (G3DSA:1.10.1780.GENE3D); IPR027417 (G3DSA:3.40.50.GENE3D); IPR041546 (PFAM); IPR003959 (PFAM); IPR027417 (G3DSA:3.40.50.GENE3D); IPR027417 (G3DSA:3.40.50.GENE3D); IPR019489 (PFAM); IPR003959 (PFAM); IPR017729 (TIGRFAM); G3DSA:1.10.8.60 (GENE3D); mobidb-lite (MOBIDB_LITE); PTHR43572 (PANTHER); PTHR43572:SF60 (PANTHER); IPR018…	F:GO:0005524; F:GO:0016887	F:ATP binding; F:ATP hydrolysis activity
WP_003093894.1	MULTISPECIES: DUF4129 domain-containing protein [Pseudomonas]	14	8	19	8	59.5	385	8	0	Yes	-1.00755	0.885254		1.18329	0.0125283		2.68656	1.06257e-05	Up	-1.07069	0.247411		PA4320		hypothetical protein	PA4320	1.5014	0.0117289	S	C:GO:0016021	C:integral component of membrane			no IPS match	no IPS match	no IPS match
WP_003095519.1	MULTISPECIES: MFS transporter [Pseudomonas]	9	3	7	3	47.4	129	3	0	Yes	1.21412	0.0110454		-1.73243	0.0085258	Down	2.67985	7.95064e-07	Up	1.05428	0.493804		PA4887		probable major facilitator superfamily (MFS) transporter	PA4887	1.08919	0.599288	EGP	P:GO:0055085; F:GO:0022857; C:GO:0005886; C:GO:0016021	P:transmembrane transport; F:transmembrane transporter activity; C:plasma membrane; C:integral component of membrane	EC:7	Translocases	IPR005828 (PFAM); IPR011701 (PFAM); IPR036259 (G3DSA:1.20.1250.GENE3D); IPR036259 (G3DSA:1.20.1250.GENE3D); mobidb-lite (MOBIDB_LITE); PTHR23521 (PANTHER); PTHR23521:SF3 (PANTHER); IPR020846 (PROSITE_PROFILES); cd17477 (CDD); IPR036259 (SUPERFAMILY)	P:GO:0055085; F:GO:0022857; C:GO:0016021	P:transmembrane transport; F:transmembrane transporter activity; C:integral component of membrane
WP_003119488.1	MULTISPECIES: tetratricopeptide repeat protein [Pseudomonas]	26	7	18	7	30.3	471	7	0	Yes	1.30948	0.0014136		-1.23743	0.00478693		2.67466	2.15694e-05	Up	3.11071	9.0972e-05	Higher	PA0086	tagJ1	TagJ1	PA0086	2.67942	7.96e-06	S	F:GO:0005515	F:protein binding			Coil (COILS); PF14559 (PFAM); IPR011990 (G3DSA:1.25.40.GENE3D); IPR009211 (PFAM); IPR009211 (PIRSF); SSF144059 (SUPERFAMILY)	F:GO:0005515	F:protein binding
WP_003084725.1	MULTISPECIES: DUF2780 domain-containing protein [Pseudomonas]	27	4	19	4	18.7	785	4	0	Yes	1.70101	0.00166467	Up	-1.24472	0.00361946		2.67337	6.19533e-05	Up	-3.91897	2.03023e-05	Lower	PA0460		hypothetical protein	PA0460	1.23014	0.107599	S					IPR021302 (PFAM)	no GO terms	no GO terms
WP_003083660.1	MULTISPECIES: type VI secretion system lipoprotein TssJ [Pseudomonas]	16	3	5	3	16.9	104	3	0	Yes	-1.07023	0.617872		1.06323	0.712826		2.66921	0.000700333	Up	2.24798	0.00590583	Higher	PA0080	tssJ1	TssJ1	PA0080	2.23879	0.000767882	S					IPR017734 (PFAM); IPR017734 (TIGRFAM); IPR038706 (G3DSA:2.60.40.GENE3D); IPR017734 (PANTHER); PS51257 (PROSITE_PROFILES)	no GO terms	no GO terms
WP_003095188.1	MULTISPECIES: 30S ribosome-binding factor RbfA [Pseudomonas]	40	5	17	5	14.5	477	5	0	Yes	1.11603	0.182781		-1.11412	0.297001		2.66424	3.77505e-05	Up	-1.59121	0.00229997	Lower	PA4743	rbfA	ribosome-binding factor A	rbfA	1.00982	0.96195	J	P:GO:0006974; P:GO:0009409; P:GO:0030490; F:GO:0043024; C:GO:0005829	P:cellular response to DNA damage stimulus; P:response to cold; P:maturation of SSU-rRNA; F:ribosomal small subunit binding; C:cytosol			IPR000238 (PFAM); IPR015946 (G3DSA:3.30.300.GENE3D); IPR000238 (TIGRFAM); IPR000238 (PANTHER); IPR020053 (PROSITE_PATTERNS); IPR000238 (HAMAP); IPR023799 (SUPERFAMILY)	P:GO:0006364	P:rRNA processing
WP_003093042.1	MULTISPECIES: copper-translocating P-type ATPase [Pseudomonas]	20	14	22	14	83.4	627	14	0	Yes	-1.01065	0.73683		-1.2102	0.000207065		2.66388	3.48072e-08	Up	-4.30741	2.041e-08	Lower	PA3920	copA1	CopA1	PA3920	-1.34342	0.000384678	P	P:GO:0035434; F:GO:0005507; F:GO:0005524; F:GO:0016887; F:GO:0042802; F:GO:0043682; C:GO:0005886; C:GO:0016021	P:copper ion transmembrane transport; F:copper ion binding; F:ATP binding; F:ATP hydrolysis activity; F:identical protein binding; F:P-type divalent copper transporter activity; C:plasma membrane; C:integral component of membrane	EC:3.6.1; EC:7.2.2.9	Acting on acid anhydrides; P-type Cu(2+) transporter	PR00943 (PRINTS); PR00119 (PRINTS); TIGR01511 (TIGRFAM); IPR027256 (TIGRFAM); G3DSA:3.30.70.100 (GENE3D); PF00702 (PFAM); PF00122 (PFAM); IPR001757 (TIGRFAM); IPR006122 (TIGRFAM); G3DSA:2.70.150.10 (GENE3D); IPR023214 (G3DSA:3.40.50.GENE3D); G3DSA:3.30.70.100 (GENE3D); IPR023299 (G3DSA:3.40.1110.GENE3D); IPR006121 (PFAM); IPR044492 (SFLD); SFLDS00003 (SFLD); PTHR43520 (PANTHER); PTHR43520 (PANTHE…	P:GO:0006812; F:GO:0000166; F:GO:0005215; F:GO:0005507; F:GO:0005524; F:GO:0016887; F:GO:0019829; F:GO:0046872; C:GO:0016021	P:cation transport; F:nucleotide binding; F:transporter activity; F:copper ion binding; F:ATP binding; F:ATP hydrolysis activity; F:ATPase-coupled cation transmembrane transporter activity; F:metal ion binding; C:integral component of membrane
WP_003083898.1	MULTISPECIES: membrane protein [Pseudomonas]	14	3	9	3	31.4	281	3	0	Yes	1.06334	0.555017		1.08073	0.480019		2.66369	0.00268912	Up	-1.95049	0.00669464	Lower	PA0165		hypothetical protein	PA0165	1.03256	0.787797	M	C:GO:0009279	C:cell outer membrane			IPR018013 (PFAM); IPR036777 (G3DSA:2.40.230.GENE3D); IPR036777 (SUPERFAMILY)	C:GO:0009279	C:cell outer membrane
WP_003096862.1	MULTISPECIES: U32 family peptidase [Pseudomonas]	10	4	9	4	51.8	277	4	0	Yes	1.09813	0.367898		-1.169	0.133381		2.65169	7.1584e-06	Up	2.49533	0.000387716	Higher	PA5440		probable peptidase	PA5440	-1.30713	0.122615	O	P:GO:0006508; F:GO:0008233; C:GO:0005829	P:proteolysis; F:peptidase activity; C:cytosol	EC:3.4	Acting on peptide bonds (peptidases)	G3DSA:2.40.30.10 (GENE3D); IPR032525 (PFAM); IPR001539 (PFAM); PTHR30217:SF6 (PANTHER); PTHR30217 (PANTHER); IPR001539 (PROSITE_PATTERNS)	no GO terms	no GO terms
WP_003093159.1	MULTISPECIES: PhoH family protein [Pseudomonas]	42	11	30	11	38.4	844	11	0	Yes	1.04943	0.249122		-1.41082	0.000119904		2.64949	5.4131e-05	Up	1.70829	0.000130197	Higher	PA3981		conserved hypothetical protein	PA3981	-1.07017	0.524143	T	F:GO:0005524; C:GO:0005829	F:ATP binding; C:cytosol			IPR003714 (PFAM); IPR027417 (G3DSA:3.40.50.GENE3D); mobidb-lite (MOBIDB_LITE); PTHR30473 (PANTHER); PTHR30473:SF1 (PANTHER); IPR027417 (SUPERFAMILY)	F:GO:0005524	F:ATP binding
WP_003110495.1	MULTISPECIES: acetyl-CoA carboxylase biotin carboxyl carrier protein [Pseudomonas]	51	5	27	5	16.4	796	5	0	Yes	1.07887	0.463265		-1.1418	0.323255		2.64391	0.00209287	Up	-1.29194	0.164027		PA4847	accB	biotin carboxyl carrier protein (BCCP)	accB	1.25064	0.136934	I	P:GO:0006633; P:GO:0009305; P:GO:0016049; F:GO:0003989; C:GO:0005829; C:GO:0009317	P:fatty acid biosynthetic process; P:protein biotinylation; P:cell growth; F:acetyl-CoA carboxylase activity; C:cytosol; C:acetyl-CoA carboxylase complex	EC:6.4.1.2	Acetyl-CoA carboxylase	IPR001249 (PRINTS); IPR000089 (PFAM); IPR001249 (TIGRFAM); G3DSA:2.40.50.100 (GENE3D); PTHR43416 (PANTHER); PTHR43416:SF4 (PANTHER); IPR001882 (PROSITE_PATTERNS); IPR000089 (PROSITE_PROFILES); cd06850 (CDD); IPR011053 (SUPERFAMILY)	P:GO:0006633; F:GO:0003989; C:GO:0009317	P:fatty acid biosynthetic process; F:acetyl-CoA carboxylase activity; C:acetyl-CoA carboxylase complex
WP_003083630.1	MULTISPECIES: hypothetical protein [Pseudomonas]	43	12	73	12	31.8	2688	12	0	Yes	-1.15223	0.19496		1.11783	0.237229		2.64279	0.00015545	Up				PA0070	tagQ1	TagQ1	PA0070	3.3869	2.86e-06	S					IPR039567 (PFAM); mobidb-lite (MOBIDB_LITE); mobidb-lite (MOBIDB_LITE); mobidb-lite (MOBIDB_LITE)	no GO terms	no GO terms
WP_003094332.1	MULTISPECIES: UDP-N-acetylglucosamine 1-carboxyvinyltransferase [Pseudomonas]	38	15	74	15	44.6	1741	15	0	Yes	1.02624	0.490778		1.0827	0.0253511		2.63808	5.63453e-06	Up	-1.19866	0.000771678		PA4450	murA	UDP-N-acetylglucosamine 1-carboxyvinyltransferase	murA	1.01116	0.900584	M	P:GO:0007049; P:GO:0008360; P:GO:0019277; P:GO:0051301; P:GO:0071555; F:GO:0008760; C:GO:0005829	P:cell cycle; P:regulation of cell shape; P:UDP-N-acetylgalactosamine biosynthetic process; P:cell division; P:cell wall organization; F:UDP-N-acetylglucosamine 1-carboxyvinyltransferase activity; C:cytosol	EC:2.5.1.7	UDP-N-acetylglucosamine 1-carboxyvinyltransferase	IPR036968 (G3DSA:3.65.10.GENE3D); IPR005750 (TIGRFAM); IPR036968 (G3DSA:3.65.10.GENE3D); IPR001986 (PFAM); PTHR43783 (PANTHER); IPR005750 (HAMAP); IPR005750 (CDD); IPR013792 (SUPERFAMILY)	P:GO:0019277; F:GO:0003824; F:GO:0008760; F:GO:0016765	P:UDP-N-acetylgalactosamine biosynthetic process; F:catalytic activity; F:UDP-N-acetylglucosamine 1-carboxyvinyltransferase activity; F:transferase activity, transferring alkyl or aryl (other than methyl) groups
WP_003083666.1	MULTISPECIES: type VI secretion system contractile sheath small subunit [Pseudomonas]	33	5	35	5	18.8	670	5	0	Yes	1.02022	0.591369		-1.05019	0.233535		2.63787	8.92977e-07	Up	2.73504	0.0101369	Higher	PA0083	tssB1	TssB1	PA0083	3.51261	2.64e-06	S					IPR008312 (PFAM); IPR008312 (TIGRFAM); IPR008312 (PIRSF); PTHR35850:SF1 (PANTHER); IPR008312 (PANTHER)	no GO terms	no GO terms
WP_003084710.1	MULTISPECIES: cold-shock protein [Gammaproteobacteria]	36	3	23	3	7.7	490	3	0	Yes	-1.01016	0.941692		-1.70363	0.00820588	Down	2.63609	0.000146605	Up	-1.48462	0.0103603		PA0456		probable cold-shock protein	PA0456	1.46889	0.0536134	K	F:GO:0003677; C:GO:0005737	F:DNA binding; C:cytoplasm			IPR002059 (PRINTS); IPR012156 (PIRSF); G3DSA:6.20.370.130 (GENE3D); G3DSA:2.40.50.140 (GENE3D); IPR002059 (PFAM); PTHR11544:SF126 (PANTHER); PTHR11544 (PANTHER); IPR019844 (PROSITE_PATTERNS); IPR002059 (PROSITE_PROFILES); IPR002059 (CDD); IPR012340 (SUPERFAMILY)	F:GO:0003676	F:nucleic acid binding
WP_003158915.1	MULTISPECIES: AAA family ATPase [Proteobacteria]	25	12	25	12	67.9	810	12	0	Yes	1.13948	0.0168337		1.43878	0.00010936		2.63402	1.63049e-06	Up										L	P:GO:0090305; F:GO:0004519; F:GO:0005524	P:nucleic acid phosphodiester bond hydrolysis; F:endonuclease activity; F:ATP binding	EC:3.1	Acting on ester bonds	IPR027417 (G3DSA:3.40.50.GENE3D); IPR041685 (PFAM); PTHR43581 (PANTHER); PTHR43581 (PANTHER); PTHR43581:SF1 (PANTHER); PTHR43581:SF1 (PANTHER); IPR034139 (CDD); IPR027417 (SUPERFAMILY)	no GO terms	no GO terms
WP_003083642.1	MULTISPECIES: type VI secretion system-associated protein TagF [Pseudomonas]	18	4	10	4	23.8	335	4	0	Yes	1.16484	0.0192381		1.16843	0.0274376		2.62685	7.20785e-06	Up	1.83572	1.4387e-05	Higher	PA0076	tagF1	TagF1	PA0076	2.25345	8.54e-05	S					IPR017748 (PFAM); IPR038225 (G3DSA:3.40.1730.GENE3D); IPR017748 (PIRSF); IPR017748 (TIGRFAM)	no GO terms	no GO terms
WP_003110454.1	MULTISPECIES: DNA helicase Rep [Pseudomonas]	12	8	14	8	77	337	8	0	Yes	1.34811	0.0191357		1.5527	0.00155968	Up	2.62583	2.61456e-05	Up	-1.09374	0.517407		PA5296	rep	ATP-dependent DNA helicase Rep	rep	-1.72059	3.27e-05	L	P:GO:0000725; P:GO:0006268; P:GO:0009314; P:GO:0044787; P:GO:0090305; F:GO:0003697; F:GO:0005524; F:GO:0008408; F:GO:0016887; F:GO:0043138; C:GO:0005829	P:recombinational repair; P:DNA unwinding involved in DNA replication; P:response to radiation; P:bacterial-type DNA replication; P:nucleic acid phosphodiester bond hydrolysis; F:single-stranded DNA binding; F:ATP binding; F:3'-5' exonuclease activity; F:ATP hydrolysis activity; F:3'-5' DNA helicase activity; C:cytosol	EC:3.6.1; EC:3.1; EC:3.6.4.12	Acting on acid anhydrides; Acting on ester bonds; DNA helicase	IPR027417 (G3DSA:3.40.50.GENE3D); IPR005752 (TIGRFAM); IPR014016 (PFAM); IPR013986 (G3DSA:1.10.10.GENE3D); IPR027417 (G3DSA:3.40.50.GENE3D); G3DSA:1.10.486.10 (GENE3D); IPR014017 (PFAM); IPR000212 (PANTHER); PTHR11070:SF7 (PANTHER); IPR005752 (HAMAP); IPR014016 (PROSITE_PROFILES); IPR014017 (PROSITE_PROFILES); cd17932 (CDD); cd18807 (CDD); IPR027417 (SUPERFAMILY)	P:GO:0006268; F:GO:0003677; F:GO:0003678; F:GO:0005524; F:GO:0016787	P:DNA unwinding involved in DNA replication; F:DNA binding; F:DNA helicase activity; F:ATP binding; F:hydrolase activity
WP_003093727.1	MULTISPECIES: 30S ribosomal protein S3 [Pseudomonas]	49	10	62	10	25.8	935	10	0	Yes	-1.05933	0.183389		1.00777	0.850011		2.62091	8.57069e-08	Up	-1.10489	0.0805661		PA4257	rpsC	30S ribosomal protein S3	rpsC	2.54492	0.00364962	J	P:GO:0000028; P:GO:0006412; F:GO:0003729; F:GO:0003735; F:GO:0019843; C:GO:0005618; C:GO:0005886	P:ribosomal small subunit assembly; P:translation; F:mRNA binding; F:structural constituent of ribosome; F:rRNA binding; C:cell wall; C:plasma membrane			IPR015946 (G3DSA:3.30.300.GENE3D); IPR036419 (G3DSA:3.30.1140.GENE3D); IPR001351 (PFAM); IPR005704 (TIGRFAM); IPR004044 (PFAM); PTHR11760:SF19 (PANTHER); PTHR11760 (PANTHER); IPR018280 (PROSITE_PATTERNS); IPR005704 (HAMAP); IPR004044 (PROSITE_PROFILES); PS50084 (PROSITE_PROFILES); cd02412 (CDD); IPR009019 (SUPERFAMILY); IPR036419 (SUPERFAMILY)	P:GO:0006412; F:GO:0003723; F:GO:0003735	P:translation; F:RNA binding; F:structural constituent of ribosome
WP_003083691.1	MULTISPECIES: hypothetical protein [Pseudomonas]	19	7	14	7	47.1	381	7	0	Yes	1.67345	0.0107671	Up	2.18811	0.000829123	Up	2.61691	0.000147197	Up										S	C:GO:0016021	C:integral component of membrane			IPR008727 (PFAM); G3DSA:2.60.200.60 (GENE3D); cd14742 (CDD)	no GO terms	no GO terms
WP_003084270.1	MULTISPECIES: N-carbamoylputrescine amidase [Pseudomonas]	23	5	12	5	32.7	351	5	0	Yes	-1.03315	0.655826		1.29925	0.0061007		2.58632	4.82692e-06	Up	3.1829	3.44278e-05	Higher	PA0293	aguB	N-carbamoylputrescine amidohydrolase	aguB	1.16837	0.265552	S	P:GO:0033388; F:GO:0047417; F:GO:0050126	P:putrescine biosynthetic process from arginine; F:N-carbamoyl-D-amino acid hydrolase activity; F:N-carbamoylputrescine amidase activity	EC:3.5.1.53; EC:3.5.1.77	N-carbamoylputrescine amidase; N-carbamoyl-D-amino-acid hydrolase	IPR036526 (G3DSA:3.60.110.GENE3D); IPR017755 (TIGRFAM); IPR003010 (PFAM); PTHR43674:SF6 (PANTHER); PTHR43674 (PANTHER); IPR003010 (PROSITE_PROFILES); cd07573 (CDD); IPR036526 (SUPERFAMILY)	P:GO:0006596; P:GO:0006807; F:GO:0050126	P:polyamine biosynthetic process; P:nitrogen compound metabolic process; F:N-carbamoylputrescine amidase activity
WP_003091593.1	MULTISPECIES: tail-specific protease [Pseudomonas]	21	15	36	15	78.1	1015	15	0	Yes	1.3617	0.000384517		-2.14939	0.000282348	Down	2.58071	7.84612e-06	Up	1.20184	0.129705		PA3257	algO	AlgO				M	P:GO:0006508; P:GO:0007165; F:GO:0004175; F:GO:0005515; F:GO:0008236; C:GO:0030288	P:proteolysis; P:signal transduction; F:endopeptidase activity; F:protein binding; F:serine-type peptidase activity; C:outer membrane-bounded periplasmic space	EC:3.4	Acting on peptide bonds (peptidases)	Coil (COILS); Coil (COILS); IPR004447 (TIGRFAM); IPR005151 (PFAM); IPR040573 (PFAM); IPR001478 (PFAM); IPR036034 (G3DSA:2.30.42.GENE3D); G3DSA:3.30.750.44 (GENE3D); G3DSA:3.90.226.10 (GENE3D); IPR020992 (PFAM); mobidb-lite (MOBIDB_LITE); mobidb-lite (MOBIDB_LITE); PTHR32060 (PANTHER); PTHR32060:SF26 (PANTHER); IPR001478 (PROSITE_PROFILES); cd00988 (CDD); IPR004447 (CDD); IPR036034 (SUPERFAMILY); …	P:GO:0006508; F:GO:0005515; F:GO:0008236	P:proteolysis; F:protein binding; F:serine-type peptidase activity
WP_003091144.1	MULTISPECIES: DUF177 domain-containing protein [Pseudomonas]	21	3	14	3	19.6	577	3	0	Yes	1.09853	0.176407		-1.678	0.000340685	Down	2.58045	1.31184e-05	Up	1.30415	0.0146096		PA2971		conserved hypothetical protein	PA2971	1.04223	0.815355	S	C:GO:0005829	C:cytosol			IPR003772 (PFAM); IPR039255 (PANTHER)	no GO terms	no GO terms
WP_003087885.1	MULTISPECIES: hypothetical protein [Pseudomonas]	43	17	57	17	48.5	1615	17	0	Yes	1.10961	0.0152293		-1.03865	0.203019		2.54527	7.60632e-07	Up	2.2983	2.46708e-06	Higher	PA1791		hypothetical protein	PA1791	1.35099	0.0693858	O	P:GO:0006508; F:GO:0008233; C:GO:0016021	P:proteolysis; F:peptidase activity; C:integral component of membrane	EC:3.4	Acting on peptide bonds (peptidases)	Coil (COILS); Coil (COILS); IPR001107 (PFAM); IPR036013 (G3DSA:3.30.479.GENE3D)	no GO terms	no GO terms
WP_003140752.1	MULTISPECIES: anthranilate synthase component 1 [Pseudomonas]	16	7	9	7	58.5	260	7	0	Yes	1.38415	0.003298		3.2936	0.00012336	Up	2.54121	5.10883e-05	Up				PA1001	phnA	anthranilate synthase component I	phnA	-1.03143	0.804937	E	P:GO:0000162; F:GO:0004049; F:GO:0046872; C:GO:0005829	P:tryptophan biosynthetic process; F:anthranilate synthase activity; F:metal ion binding; C:cytosol	EC:4.1.3.27	Anthranilate synthase	IPR019999 (PRINTS); IPR015890 (PFAM); IPR005257 (TIGRFAM); IPR005257 (PIRSF); IPR006805 (PFAM); IPR005801 (G3DSA:3.60.120.GENE3D); IPR005257 (PTHR11236:PANTHER); IPR019999 (PANTHER); IPR005801 (SUPERFAMILY)	P:GO:0009058; F:GO:0004049	P:biosynthetic process; F:anthranilate synthase activity
WP_003084830.1	MULTISPECIES: malonyl-ACP O-methyltransferase BioC [Pseudomonas]	16	4	7	4	29.7	283	4	0	Yes	1.21334	0.0421227		1.53889	0.00259046	Up	2.53735	3.16221e-05	Up				PA0503		probable biotin synthesis protein BioC	PA0503	1.05275	0.757648	H	P:GO:0006805; P:GO:0009102; P:GO:0032259; F:GO:0010340; F:GO:0102130	P:xenobiotic metabolic process; P:biotin biosynthetic process; P:methylation; F:carboxyl-O-methyltransferase activity; F:malonyl-CoA methyltransferase activity	EC:2.1.1.197	Malonyl-[acyl-carrier protein] O-methyltransferase	IPR013216 (PFAM); IPR011814 (TIGRFAM); G3DSA:3.40.50.150 (GENE3D); PTHR43464 (PANTHER); PTHR43464:SF53 (PANTHER); IPR011814 (HAMAP); cd02440 (CDD); IPR029063 (SUPERFAMILY)	P:GO:0009102; F:GO:0008168; F:GO:0010340	P:biotin biosynthetic process; F:methyltransferase activity; F:carboxyl-O-methyltransferase activity
WP_075116598.1	DUF4124 domain-containing protein [Pseudomonas aeruginosa]	58	4	8	4	16.9	213	4	0	Yes	-1.02676	0.31642		-1.91046	1.15649e-06	Down	2.53487	0.000460424	Up															IPR025392 (PFAM); mobidb-lite (MOBIDB_LITE); mobidb-lite (MOBIDB_LITE); mobidb-lite (MOBIDB_LITE)	no GO terms	no GO terms
WP_003096679.1	MULTISPECIES: choline dehydrogenase [Pseudomonas]	35	14	32	14	61.8	1116	14	0	Yes	1.14672	0.0177461		1.20875	0.00457499		2.5336	2.94373e-05	Up	-1.00596	0.90122		PA5372	betA	choline dehydrogenase	betA	-1.16755	0.473242	E	P:GO:0006970; P:GO:0019285; P:GO:0042133; F:GO:0008802; F:GO:0008812; F:GO:0050660; C:GO:0016020	P:response to osmotic stress; P:glycine betaine biosynthetic process from choline; P:neurotransmitter metabolic process; F:betaine-aldehyde dehydrogenase activity; F:choline dehydrogenase activity; F:flavin adenine dinucleotide binding; C:membrane	EC:1.2.1.8; EC:1.2.1.5; EC:1.2.1.3; EC:1.1.99.1	Betaine-aldehyde dehydrogenase; Aldehyde dehydrogenase (NAD(P)(+)); Aldehyde dehydrogenase (NAD(+)); Choline dehydrogenase	IPR000172 (PFAM); IPR007867 (PFAM); IPR012132 (PIRSF); IPR036188 (G3DSA:3.50.50.GENE3D); G3DSA:3.30.560.10 (GENE3D); IPR011533 (TIGRFAM); mobidb-lite (MOBIDB_LITE); IPR012132 (PANTHER); PTHR11552:SF147 (PANTHER); IPR000172 (PROSITE_PATTERNS); IPR000172 (PROSITE_PATTERNS); IPR011533 (HAMAP); IPR036188 (SUPERFAMILY); SSF54373 (SUPERFAMILY)	P:GO:0019285; F:GO:0008812; F:GO:0016614; F:GO:0050660	P:glycine betaine biosynthetic process from choline; F:choline dehydrogenase activity; F:oxidoreductase activity, acting on CH-OH group of donors; F:flavin adenine dinucleotide binding
WP_003094118.1	MULTISPECIES: cell division protein FtsQ [Pseudomonas]	23	5	7	5	32.2	112	5	0	Yes	-1.0423	0.891811		1.24299	0.388228		2.53357	0.0108524	Up	-1.42886	0.76146		PA4409	ftsQ	cell division protein FtsQ	ftsQ	1.7344	4.95e-11	D	P:GO:0000917; P:GO:0043093; P:GO:1902410; F:GO:0042802; C:GO:0005887; C:GO:0032153	P:division septum assembly; P:FtsZ-dependent cytokinesis; P:mitotic cytokinetic process; F:identical protein binding; C:integral component of plasma membrane; C:cell division site			IPR045335 (G3DSA:3.40.50.GENE3D); IPR013685 (PFAM); IPR005548 (PFAM); G3DSA:3.10.20.310 (GENE3D); IPR026579 (PANTHER); IPR026579 (HAMAP); IPR034746 (PROSITE_PROFILES)	P:GO:0090529	P:cell septum assembly
WP_003085528.1	MULTISPECIES: HDOD domain-containing protein [Pseudomonas]	33	9	25	9	30.9	579	9	0	Yes	1.04355	0.369135		-1.20757	0.00126065		2.5331	3.05638e-07	Up	-4.54588	3.9758e-06	Lower	PA0758		hypothetical protein	PA0758	-1.11484	0.305502	T	P:GO:0016310; F:GO:0016301	P:phosphorylation; F:kinase activity	EC:2.7	Transferring phosphorus-containing groups	IPR013976 (PFAM); G3DSA:1.10.3210.10 (GENE3D); PTHR33525:SF3 (PANTHER); PTHR33525 (PANTHER); IPR013976 (PROSITE_PROFILES); SSF109604 (SUPERFAMILY)	no GO terms	no GO terms
WP_003087958.1	MULTISPECIES: DNA polymerase III subunit epsilon [Pseudomonas]	28	6	13	6	26.8	384	6	0	Yes	1.07986	0.0436655		1.16667	0.00775338		2.52045	4.11632e-06	Up	1.12843	0.387637		PA1816	dnaQ	DNA polymerase III, epsilon chain	dnaQ	1.12309	0.225936	L	P:GO:0045004; P:GO:0071897; P:GO:0090305; F:GO:0003677; F:GO:0003887; F:GO:0008408; F:GO:0046872; C:GO:0005829; C:GO:0044776	P:DNA replication proofreading; P:DNA biosynthetic process; P:nucleic acid phosphodiester bond hydrolysis; F:DNA binding; F:DNA-directed DNA polymerase activity; F:3'-5' exonuclease activity; F:metal ion binding; C:cytosol; C:DNA polymerase III, core complex	EC:3.1; EC:2.7.7.7	Acting on ester bonds; DNA-directed DNA polymerase	IPR013520 (PFAM); IPR036397 (G3DSA:3.30.420.GENE3D); IPR006054 (TIGRFAM); IPR006309 (TIGRFAM); PTHR30231 (PANTHER); PTHR30231:SF32 (PANTHER); IPR006309 (CDD); IPR012337 (SUPERFAMILY)	P:GO:0006260; F:GO:0003676; F:GO:0003677; F:GO:0003887	P:DNA replication; F:nucleic acid binding; F:DNA binding; F:DNA-directed DNA polymerase activity
WP_003112105.1	MULTISPECIES: bifunctional 4-hydroxy-2-oxoglutarate aldolase/2-dehydro-3-deoxy-phosphogluconate aldolase [Pseudomonas]	41	8	30	8	23.9	773	8	0	Yes	1.10226	0.051774		1.59324	0.000404546	Up	2.5159	7.23046e-06	Up	1.32335	0.00167915		PA3181		2-keto-3-deoxy-6-phosphogluconate aldolase	PA3181	1.22629	0.33726	G	F:GO:0008675; F:GO:0008700; F:GO:0008948; F:GO:0042802; F:GO:0061677; F:GO:0106009; C:GO:0005829	F:2-dehydro-3-deoxy-phosphogluconate aldolase activity; F:4-hydroxy-2-oxoglutarate aldolase activity; F:oxaloacetate decarboxylase activity; F:identical protein binding; F:2-dehydro-3-deoxy-D-gluconate aldolase activity; F:(4S)-4-hydroxy-2-oxoglutarate aldolase activity; C:cytosol	EC:4.1.2.14; EC:4.1.3.16; EC:4.1.1.112; EC:1.1.1.38; EC:4.1.3.42; EC:4.1.2.51; EC:1.1.1.40	2-dehydro-3-deoxy-phosphogluconate aldolase; 4-hydroxy-2-oxoglutarate aldolase; Oxaloacetate decarboxylase; Malate dehydrogenase (oxaloacetate-decarboxylating); (4S)-4-hydroxy-2-oxoglutarate aldolase; 2-dehydro-3-deoxy-D-gluconate aldolase; Malate dehydrogenase (oxaloacetate-decarboxylating) (NADP(+))	IPR013785 (G3DSA:3.20.20.GENE3D); IPR000887 (PFAM); IPR000887 (TIGRFAM); IPR000887 (PANTHER); IPR031338 (PROSITE_PATTERNS); IPR031337 (PROSITE_PATTERNS); IPR000887 (CDD); SSF51569 (SUPERFAMILY)	F:GO:0003824; F:GO:0016829	F:catalytic activity; F:lyase activity
WP_003097245.1	MULTISPECIES: 16S rRNA (guanine(527)-N(7))-methyltransferase RsmG [Pseudomonas]	39	7	10	7	23.7	240	7	0	Yes	1.16116	0.00195335		1.01511	0.592466		2.51527	0.000199762	Up	-1.25748	0.0053319		PA5564	gidB	glucose inhibited division protein B	gidB	-1.26642	0.0321356	J	P:GO:0070476; F:GO:0070043; C:GO:0005829	P:rRNA (guanine-N7)-methylation; F:rRNA (guanine-N7-)-methyltransferase activity; C:cytosol	EC:2.1.1	Transferring one-carbon groups	IPR003682 (PIRSF); IPR003682 (TIGRFAM); G3DSA:3.40.50.150 (GENE3D); IPR003682 (PFAM); IPR003682 (PANTHER); IPR003682 (HAMAP); IPR029063 (SUPERFAMILY)	P:GO:0006364; F:GO:0008649; C:GO:0005737	P:rRNA processing; F:rRNA methyltransferase activity; C:cytoplasm
WP_003087367.1	MULTISPECIES: hypothetical protein [Pseudomonas]	81	5	7	5	6.7	175	5	0	Yes	-1.12284	0.509143		1.12568	0.270305		2.51447	0.0463906	Up				PA1571		hypothetical protein	PA1571	1.01241	0.933477						no IPS match	no IPS match	no IPS match
WP_003132826.1	MULTISPECIES: tRNA-(ms[2]io[6]A)-hydroxylase [Pseudomonas]	34	6	12	6	23.2	420	6	0	Yes	1.19763	0.309718		-1.05511	0.850021		2.5105	0.0107368	Up				PA1790		hypothetical protein	PA1790	-1.54512	0.00556321	FJ	P:GO:0002195; F:GO:0045301	P:2-methylthio-N-6-(cis-hydroxy)isopentenyl adenosine-tRNA biosynthesis; F:tRNA-(2-methylthio-N-6-(cis-hydroxy)isopentenyl adenosine)-hydroxylase activity	EC:1	Oxidoreductases	IPR010386 (PFAM); IPR012347 (G3DSA:1.20.1260.GENE3D); IPR010386 (PIRSF); IPR010386 (PANTHER); IPR010386 (CDD); IPR009078 (SUPERFAMILY)	P:GO:0006400; F:GO:0045301	P:tRNA modification; F:tRNA-(2-methylthio-N-6-(cis-hydroxy)isopentenyl adenosine)-hydroxylase activity
WP_003158912.1	MULTISPECIES: DUF262 domain-containing protein [Proteobacteria]	39	24	98	24	81.2	2864	24	0	Yes	1.41845	0.000397663		1.71492	3.23067e-07	Up	2.49721	5.60037e-08	Up										S					IPR043714 (PFAM); IPR011089 (PFAM); IPR004919 (PFAM); PTHR35149:SF3 (PANTHER); PTHR35149 (PANTHER)	no GO terms	no GO terms
WP_003085404.1	MULTISPECIES: glycosyltransferase family 2 protein [Pseudomonas]	32	10	14	10	34.5	317	10	0	Yes	1.08	0.11285		1.47391	0.00287015		2.49565	0.00016194	Up										M	F:GO:0016757	F:glycosyltransferase activity	EC:2.4	Glycosyltransferases	IPR029044 (G3DSA:3.90.550.GENE3D); IPR001173 (PFAM); PTHR43685 (PANTHER); cd00761 (CDD); IPR029044 (SUPERFAMILY)	no GO terms	no GO terms
WP_003092120.1	MULTISPECIES: UDP-glucose/GDP-mannose dehydrogenase family protein [Pseudomonas]	20	9	14	9	51.7	367	9	0	Yes	1.99925	0.0135445	Up	1.56021	0.0606472		2.49514	0.0133767	Up	-2.12266	0.0110125	Lower	PA3559		probable nucleotide sugar dehydrogenase	PA3559	1.90319	0.000277977	M	P:GO:0000271; F:GO:0003979; F:GO:0051287	P:polysaccharide biosynthetic process; F:UDP-glucose 6-dehydrogenase activity; F:NAD binding	EC:1.1.1.22	UDP-glucose 6-dehydrogenase	G3DSA:3.40.50.720 (GENE3D); G3DSA:1.20.5.100 (GENE3D); IPR001732 (PFAM); IPR017476 (PIRSF); IPR028357 (PIRSF); IPR014027 (PFAM); G3DSA:3.40.50.720 (GENE3D); IPR014026 (PFAM); IPR017476 (TIGRFAM); PTHR43750:SF3 (PANTHER); PTHR43750 (PANTHER); IPR008927 (SUPERFAMILY); IPR036220 (SUPERFAMILY); IPR036291 (SUPERFAMILY)	P:GO:0000271; F:GO:0003979; F:GO:0016616; F:GO:0051287	P:polysaccharide biosynthetic process; F:UDP-glucose 6-dehydrogenase activity; F:oxidoreductase activity, acting on the CH-OH group of donors, NAD or NADP as acceptor; F:NAD binding
WP_003085519.1	MULTISPECIES: tripartite tricarboxylate transporter substrate binding protein [Pseudomonas]	35	11	28	11	34.9	661	11	0	Yes	1.19481	0.00034801		-1.2905	0.00474268		2.49405	1.0635e-08	Up	-2.13203	5.6114e-06	Lower	PA0754		hypothetical protein	PA0754	-1.42916	0.0193108	S					IPR005064 (PFAM); IPR005064 (PIRSF); IPR042100 (G3DSA:3.40.190.GENE3D); G3DSA:3.40.190.10 (GENE3D); PTHR42928:SF3 (PANTHER); IPR005064 (PANTHER); cd07012 (CDD); SSF53850 (SUPERFAMILY)	no GO terms	no GO terms
WP_003094005.1	MULTISPECIES: superoxide dismutase [Fe] [Pseudomonas]	9	2	29	2	21.3	410	2	0	Yes	-1.03568	0.20361		-1.17066	0.00476109		2.48078	1.26153e-06	Up	-2.39191	1.81648e-06	Lower	PA4366	sodB	superoxide dismutase	sodB	1.11161	0.637221	P	P:GO:0019430; F:GO:0004784; F:GO:0046872	P:removal of superoxide radicals; F:superoxide dismutase activity; F:metal ion binding	EC:1.15.1.1	Superoxide dismutase	IPR001189 (PRINTS); IPR036324 (G3DSA:1.10.287.GENE3D); IPR036314 (G3DSA:3.55.40.GENE3D); IPR019832 (PFAM); IPR019831 (PFAM); IPR001189 (PIRSF); PTHR42769 (PANTHER); PTHR42769:SF3 (PANTHER); IPR019833 (PROSITE_PATTERNS); IPR036314 (SUPERFAMILY); IPR036324 (SUPERFAMILY)	P:GO:0006801; F:GO:0004784; F:GO:0046872	P:superoxide metabolic process; F:superoxide dismutase activity; F:metal ion binding
WP_003083648.1	MULTISPECIES: type VI secretion system membrane subunit TssM [Pseudomonas]	31	32	76	32	130	2338	32	0	Yes	1.11832	0.107912		-1.00562	0.828305		2.47666	1.98989e-08	Up										S	C:GO:0016021	C:integral component of membrane			Coil (COILS); Coil (COILS); IPR010623 (PFAM); IPR009612 (PFAM); IPR025743 (PFAM); IPR017731 (TIGRFAM); mobidb-lite (MOBIDB_LITE); PTHR36153:SF1 (PANTHER); PTHR36153 (PANTHER); cd00882 (CDD); IPR027417 (SUPERFAMILY)	no GO terms	no GO terms
WP_003085816.1	MULTISPECIES: peptidylprolyl isomerase [Pseudomonas]	16	2	20	2	17	463	2	0	Yes	1.37828	0.0559552		-1.03071	0.822921		2.47276	0.00774015	Up	-1.35123	0.060889		PA0837	slyD	peptidyl-prolyl cis-trans isomerase SlyD	slyD	-1.00342	0.960543	G	P:GO:0000413; P:GO:0042026; F:GO:0003755	P:protein peptidyl-prolyl isomerization; P:protein refolding; F:peptidyl-prolyl cis-trans isomerase activity	EC:5.2.1.8	Peptidylprolyl isomerase	G3DSA:3.10.50.40 (GENE3D); IPR001179 (PFAM); PTHR47861:SF3 (PANTHER); PTHR47861 (PANTHER); IPR001179 (PROSITE_PROFILES); SSF54534 (SUPERFAMILY)	F:GO:0003755	F:peptidyl-prolyl cis-trans isomerase activity
WP_009314145.1	phosphatase PAP2/dual specificity phosphatase family protein [Pseudomonas aeruginosa]	12	4	10	4	49.5	238	4	0	Yes	1.06104	0.353355		1.09916	0.183408		2.47077	0.000337758	Up										IT	P:GO:0006470; F:GO:0008138; C:GO:0005886; C:GO:0016021	P:protein dephosphorylation; F:protein tyrosine/serine/threonine phosphatase activity; C:plasma membrane; C:integral component of membrane	EC:3.1.3	Acting on ester bonds	IPR029021 (G3DSA:3.90.190.GENE3D); IPR000340 (PFAM); PTHR47216:SF4 (PANTHER); PTHR47216 (PANTHER); IPR000387 (PROSITE_PROFILES); cd03386 (CDD); cd14527 (CDD); IPR029021 (SUPERFAMILY)	P:GO:0016311; F:GO:0008138; F:GO:0016791	P:dephosphorylation; F:protein tyrosine/serine/threonine phosphatase activity; F:phosphatase activity
WP_003085223.1	MULTISPECIES: adenosylmethionine decarboxylase [Pseudomonas]	10	2	4	2	30.5	116	2	0	Yes	1.27653	0.20341		1.27248	0.128774		2.46718	0.0014731	Up	-1.70144	0.013261	Lower	PA0654	speD	S-adenosylmethionine decarboxylase proenzyme	speD	-1.94419	1.2e-08	E	P:GO:0006557; P:GO:0008295; P:GO:0097164; F:GO:0004014; C:GO:0005829	P:S-adenosylmethioninamine biosynthetic process; P:spermidine biosynthetic process; P:ammonium ion metabolic process; F:adenosylmethionine decarboxylase activity; C:cytosol	EC:4.1.1.50	Adenosylmethionine decarboxylase	IPR009165 (TIGRFAM); G3DSA:3.60.90.10 (GENE3D); IPR003826 (PFAM); IPR009165 (PIRSF); IPR003826 (PANTHER); PTHR33866:SF1 (PANTHER); IPR009165 (HAMAP); IPR016067 (SUPERFAMILY)	P:GO:0008295; F:GO:0004014	P:spermidine biosynthetic process; F:adenosylmethionine decarboxylase activity
WP_019485342.1	MULTISPECIES: deoxyribodipyrimidine photo-lyase [Pseudomonas]	9	5	6	5	54.7	108	5	0	Yes	1.24035	0.115882		1.12038	0.335317		2.46617	0.000607003	Up	-2.09465	0.00203586	Lower	PA4660	phr	deoxyribodipyrimidine photolyase	phr	1.03578	0.898079	L	P:GO:0018298; F:GO:0003904	P:protein-chromophore linkage; F:deoxyribodipyrimidine photo-lyase activity	EC:4.1.99.3	Deoxyribodipyrimidine photo-lyase	IPR002081 (PRINTS); G3DSA:1.10.579.10 (GENE3D); IPR005101 (PFAM); IPR006050 (PFAM); G3DSA:1.25.40.80 (GENE3D); IPR014729 (G3DSA:3.40.50.GENE3D); mobidb-lite (MOBIDB_LITE); mobidb-lite (MOBIDB_LITE); IPR002081 (PANTHER); PTHR11455:SF9 (PANTHER); IPR006050 (PROSITE_PROFILES); IPR036155 (SUPERFAMILY); IPR036134 (SUPERFAMILY)	no GO terms	no GO terms
WP_003093741.1	MULTISPECIES: elongation factor G [Pseudomonas]	63	36	386	28	77.7	10235	36	12	Yes	1.1921	4.74065e-05		1.0975	0.00173761		2.4643	3.84691e-08	Up	-1.2693	0.000200054		PA4266	fusA1	elongation factor G	fusA1	1.98459	0.0172244	J	P:GO:0006414; F:GO:0003746; F:GO:0003924; F:GO:0005525; C:GO:0005737	P:translational elongation; F:translation elongation factor activity; F:GTPase activity; F:GTP binding; C:cytoplasm	EC:3.6.1	Acting on acid anhydrides	IPR000795 (PRINTS); IPR005225 (TIGRFAM); IPR027417 (G3DSA:3.40.50.GENE3D); IPR000640 (PFAM); IPR004161 (PFAM); IPR004540 (TIGRFAM); IPR005517 (PFAM); IPR000795 (PFAM); G3DSA:2.40.30.10 (GENE3D); G3DSA:3.30.70.240 (GENE3D); IPR041095 (PFAM); G3DSA:3.30.70.870 (GENE3D); IPR014721 (G3DSA:3.30.230.GENE3D); PTHR43261:SF1 (PANTHER); PTHR43261 (PANTHER); IPR031157 (PROSITE_PATTERNS); IPR004540 (HAMAP); …	P:GO:0006414; F:GO:0003746; F:GO:0003924; F:GO:0005525	P:translational elongation; F:translation elongation factor activity; F:GTPase activity; F:GTP binding
WP_003094899.1	MULTISPECIES: XdhC family protein [Pseudomonas]	21	6	10	6	34.8	403	6	0	Yes	1.05706	0.16523		1.25413	0.000118007		2.46274	3.45114e-06	Up				PA4618		hypothetical protein	PA4618	1.01935	0.890291	O					IPR003777 (PFAM); IPR027051 (PFAM); G3DSA:3.40.50.720 (GENE3D); PTHR30388 (PANTHER); PTHR30388:SF4 (PANTHER)	no GO terms	no GO terms
WP_014603461.1	MULTISPECIES: DotU family type VI secretion system protein [Pseudomonas]	36	13	38	13	49	1296	13	0	Yes	1.08543	0.098824		-1.24645	0.000798473		2.46185	6.08427e-06	Up	1.69652	0.00221504	Higher	PA0078	tssL1	TssL1	PA0078	2.36306	7.32e-06	N	C:GO:0016021	C:integral component of membrane			IPR036737 (G3DSA:3.30.1330.GENE3D); IPR017733 (TIGRFAM); IPR017732 (TIGRFAM); IPR038522 (G3DSA:1.25.40.GENE3D); IPR017732 (PFAM); IPR006665 (PFAM); mobidb-lite (MOBIDB_LITE); PTHR30329:SF4 (PANTHER); PTHR30329 (PANTHER); IPR006665 (PROSITE_PROFILES); IPR006665 (CDD); IPR036737 (SUPERFAMILY)	no GO terms	no GO terms
WP_003095037.1	MULTISPECIES: hypothetical protein [Pseudomonas]	23	10	19	10	49.2	532	10	0	Yes	-1.05813	0.453566		1.17834	0.0551952		2.45462	0.000134205	Up	-1.21099	0.0306149		PA4684		hypothetical protein	PA4684	-1.23383	0.0240023						mobidb-lite (MOBIDB_LITE)	no GO terms	no GO terms
WP_003087306.1	MULTISPECIES: cytochrome-c oxidase, cbb3-type subunit I [Pseudomonas]	5	2	6	1	53.1	176	2	0	Yes	1.0304	0.770488		1.57415	0.0902631		2.45256	0.00768517	Up	1.18825	0.517378		PA1554	ccoN1	Cytochrome c oxidase, cbb3-type, CcoN subunit	ccoN1	-1.04724	0.722912	C	P:GO:0009060; P:GO:0015990; P:GO:0022904; F:GO:0004129; F:GO:0020037; F:GO:0046872; C:GO:0016021; C:GO:0045278	P:aerobic respiration; P:electron transport coupled proton transport; P:respiratory electron transport chain; F:cytochrome-c oxidase activity; F:heme binding; F:metal ion binding; C:integral component of membrane; C:plasma membrane respiratory chain complex IV	EC:1.9; EC:7.1.1.9	Acting on a heme group of donors; Cytochrome-c oxidase	IPR000883 (PFAM); IPR004677 (TIGRFAM); IPR036927 (G3DSA:1.20.210.GENE3D); IPR000883 (PANTHER); IPR004677 (PTHR10422:PANTHER); IPR023615 (PROSITE_PATTERNS); IPR023616 (PROSITE_PROFILES); IPR036927 (SUPERFAMILY)	P:GO:0009060; F:GO:0004129; F:GO:0020037; C:GO:0016021; C:GO:0045278	P:aerobic respiration; F:cytochrome-c oxidase activity; F:heme binding; C:integral component of membrane; C:plasma membrane respiratory chain complex IV
WP_003130495.1	MULTISPECIES: 6-phosphogluconolactonase [Pseudomonas]	42	8	24	8	25.6	906	8	0	Yes	1.07736	0.240921		1.36476	0.00254406		2.44785	4.67655e-05	Up	-1.19198	0.0222932		PA3182	pgl	6-phosphogluconolactonase	pgl	1.13662	0.518351	G	P:GO:0005975; P:GO:0006098; F:GO:0017057	P:carbohydrate metabolic process; P:pentose-phosphate shunt; F:6-phosphogluconolactonase activity	EC:3.1.1.31; EC:3.1.1.1	6-phosphogluconolactonase; Carboxylesterase	G3DSA:3.40.50.1360 (GENE3D); IPR005900 (TIGRFAM); IPR006148 (PFAM); PTHR11054:SF0 (PANTHER); IPR039104 (PANTHER); IPR005900 (CDD); IPR037171 (SUPERFAMILY)	P:GO:0005975; P:GO:0006098; F:GO:0017057	P:carbohydrate metabolic process; P:pentose-phosphate shunt; F:6-phosphogluconolactonase activity
WP_003083679.1	MULTISPECIES: type VI secretion system baseplate subunit TssG [Pseudomonas]	7	3	4	3	39.5	148	3	0	Yes	1.1389	0.693069		1.04001	0.902514		2.44768	0.000183489	Up	1.56872	0.16244		PA0089	tssG1	TssG1	PA0089	3.1288	8.37e-08	S					IPR010732 (PFAM); IPR010732 (TIGRFAM); PTHR35564:SF4 (PANTHER); IPR010732 (PANTHER)	no GO terms	no GO terms
WP_003092260.1	MULTISPECIES: recombinase RecA [Pseudomonas]	45	12	71	12	36.9	2122	12	0	Yes	-1.10593	0.0209196		1.03054	0.247103		2.44309	7.62211e-08	Up	-1.20627	0.000376705		PA3617	recA	RecA protein	recA	-1.28757	0.0142615	L	P:GO:0006281; P:GO:0006310; P:GO:0009432; F:GO:0003684; F:GO:0003697; F:GO:0005524; F:GO:0008094; C:GO:0005737	P:DNA repair; P:DNA recombination; P:SOS response; F:damaged DNA binding; F:single-stranded DNA binding; F:ATP binding; F:ATP-dependent activity, acting on DNA; C:cytoplasm			IPR013765 (PRINTS); IPR013765 (PFAM); IPR013765 (TIGRFAM); IPR027417 (G3DSA:3.40.50.GENE3D); IPR013765 (PANTHER); PTHR45900:SF1 (PANTHER); IPR020584 (PROSITE_PATTERNS); IPR020587 (PROSITE_PROFILES); IPR013765 (HAMAP); IPR020588 (PROSITE_PROFILES); IPR013765 (CDD); IPR027417 (SUPERFAMILY); IPR023400 (SUPERFAMILY)	P:GO:0006259; P:GO:0006281; F:GO:0003677; F:GO:0003697; F:GO:0005524; F:GO:0008094	P:DNA metabolic process; P:DNA repair; F:DNA binding; F:single-stranded DNA binding; F:ATP binding; F:ATP-dependent activity, acting on DNA
WP_023097707.1	aldehyde dehydrogenase [Pseudomonas aeruginosa]	40	14	75	1	54.9	2152	14	0	Yes	-1.03369	0.981333		-1.48914	0.264225		2.43139	0.53505		-4.28302	0.00302189	Lower	PA1984	exaC	NAD+ dependent aldehyde dehydrogenase ExaC	exaC	-1.12705	0.336346	C	F:GO:0016620	F:oxidoreductase activity, acting on the aldehyde or oxo group of donors, NAD or NADP as acceptor	EC:1.2.1	Acting on the aldehyde or oxo group of donors	IPR016163 (G3DSA:3.40.309.GENE3D); IPR016162 (G3DSA:3.40.605.GENE3D); IPR015590 (PFAM); PTHR43111 (PANTHER); IPR029510 (PROSITE_PATTERNS); IPR016160 (PROSITE_PATTERNS); cd07559 (CDD); IPR016161 (SUPERFAMILY)	F:GO:0016491; F:GO:0016620	F:oxidoreductase activity; F:oxidoreductase activity, acting on the aldehyde or oxo group of donors, NAD or NADP as acceptor
WP_003110161.1	MULTISPECIES: response regulator [Pseudomonas]	19	7	13	7	40.3	370	7	0	Yes	1.14735	0.363669		1.66615	0.0310365	Up	2.42607	0.00431701	Up	-1.77537	0.0254418	Lower	PA4396		two-component response regulator	PA4396	-1.11874	0.412338	T	P:GO:0000160	P:phosphorelay signal transduction system			Coil (COILS); G3DSA:3.40.50.2300 (GENE3D); IPR000160 (PFAM); IPR001789 (PFAM); IPR043128 (G3DSA:3.30.70.GENE3D); PTHR43214 (PANTHER); PTHR43214:SF33 (PANTHER); IPR000160 (PROSITE_PROFILES); IPR001789 (PROSITE_PROFILES); cd17574 (CDD); IPR029787 (SUPERFAMILY); IPR011006 (SUPERFAMILY)	P:GO:0000160	P:phosphorelay signal transduction system
WP_003083676.1	MULTISPECIES: type VI secretion system baseplate subunit TssF [Pseudomonas]	27	13	28	13	69.4	803	13	0	Yes	1.13712	0.0244569		1.0818	0.121534		2.42469	4.16123e-05	Up	3.57273	0.000345425	Higher	PA0088	tssF1	TssF1	PA0088	2.63065	5.31e-06	S					IPR010272 (TIGRFAM); IPR010272 (PIRSF); IPR010272 (PFAM); PTHR35370:SF1 (PANTHER); IPR010272 (PANTHER)	no GO terms	no GO terms
WP_124140672.1	MULTISPECIES: hypothetical protein [Pseudomonas]	12	5	9	5	42.8	307	5	0	Yes	-1.07689	0.734508		1.02892	0.779677		2.41979	0.00245266	Up															no IPS match	no IPS match	no IPS match
WP_003088281.1	AAA family ATPase [Pseudomonas aeruginosa]	7	4	6	4	63.2	173	4	0	Yes	1.17208	0.0734479		1.89506	0.000124981	Up	2.41485	0.000130992	Up										S					IPR041685 (PFAM); IPR027417 (G3DSA:3.40.50.GENE3D); PTHR43581 (PANTHER); IPR027417 (SUPERFAMILY)	no GO terms	no GO terms
WP_003134709.1	MULTISPECIES: DUF481 domain-containing protein [Pseudomonas]	25	8	27	8	38.1	536	8	0	Yes	-1.21433	0.0381028		1.03003	0.584786		2.40653	0.000192392	Up	1.45849	0.00199348		PA4390		hypothetical protein	PA4390	-1.06175	0.714727	M					IPR007433 (PFAM)	no GO terms	no GO terms
WP_003085565.1	MULTISPECIES: ribonuclease III [Pseudomonas]	14	4	5	4	25.5	124	4	0	Yes	0.997517	0.907214		1.18056	0.0932347		2.40263	2.84121e-06	Up	-1.5619	5.37449e-05	Lower	PA0770	rnc	ribonuclease III	rnc	-1.08261	0.489548	J	P:GO:0006364; P:GO:0006397; P:GO:0008033; P:GO:0016075; P:GO:0090502; F:GO:0000287; F:GO:0003725; F:GO:0004525; F:GO:0019843; F:GO:0019899; C:GO:0005829	P:rRNA processing; P:mRNA processing; P:tRNA processing; P:rRNA catabolic process; P:RNA phosphodiester bond hydrolysis, endonucleolytic; F:magnesium ion binding; F:double-stranded RNA binding; F:ribonuclease III activity; F:rRNA binding; F:enzyme binding; C:cytosol	EC:3.1.30; EC:3.1.26.3	Acting on ester bonds; Ribonuclease III	G3DSA:3.30.160.20 (GENE3D); IPR000999 (PFAM); IPR036389 (G3DSA:1.10.1520.GENE3D); IPR014720 (PFAM); IPR011907 (TIGRFAM); PTHR11207:SF0 (PANTHER); IPR011907 (PANTHER); IPR000999 (PROSITE_PATTERNS); IPR000999 (PROSITE_PROFILES); IPR011907 (HAMAP); IPR014720 (PROSITE_PROFILES); IPR000999 (CDD); cd10845 (CDD); SSF54768 (SUPERFAMILY); IPR036389 (SUPERFAMILY)	P:GO:0006396; P:GO:0016075; F:GO:0003723; F:GO:0004525	P:RNA processing; P:rRNA catabolic process; F:RNA binding; F:ribonuclease III activity
WP_003093241.1	MULTISPECIES: DedA family protein [Pseudomonas]	12	3	12	3	24.4	233	3	0	Yes	-1.12574	0.413568		1.238	0.126331		2.40148	0.000596077	Up	1.05885	0.70355		PA4029		conserved hypothetical protein	PA4029	-1.19188	0.0359998	S	C:GO:0016021	C:integral component of membrane			IPR032816 (PFAM); IPR032818 (PANTHER); PTHR30353:SF0 (PANTHER)	no GO terms	no GO terms
WP_003112765.1	MULTISPECIES: insulin-cleaving metalloproteinase outer membrane protein [Pseudomonas]	46	17	64	17	47.2	1894	17	0	Yes	-1.24696	0.004353		-2.89785	2.26339e-06	Down	2.40051	1.16164e-06	Up	1.78921	0.00144375	Higher	PA4370	icmP	Insulin-cleaving metalloproteinase outer membrane protein precursor	icmP	1.42666	0.000443582	P					IPR018976 (PFAM); IPR038352 (G3DSA:1.20.1420.GENE3D); PS51257 (PROSITE_PROFILES); cd14657 (CDD)	no GO terms	no GO terms
WP_003090975.1	MULTISPECIES: orotidine-5'-phosphate decarboxylase [Pseudomonas]	50	7	22	7	24.4	648	7	0	Yes	1.15394	0.251513		-1.04543	0.75746		2.39106	0.00305212	Up	-1.20639	0.162767		PA2876	pyrF	orotidine 5'-phosphate decarboxylase	pyrF	-1.41507	0.00575383	F	P:GO:0006207; P:GO:0015949; P:GO:0044205; F:GO:0004590; F:GO:0042802; C:GO:0005829	P:'de novo' pyrimidine nucleobase biosynthetic process; P:nucleobase-containing small molecule interconversion; P:'de novo' UMP biosynthetic process; F:orotidine-5'-phosphate decarboxylase activity; F:identical protein binding; C:cytosol	EC:4.1.1.23	Orotidine-5'-phosphate decarboxylase	IPR014732 (TIGRFAM); IPR001754 (PFAM); IPR013785 (G3DSA:3.20.20.GENE3D); PTHR32119 (PANTHER); IPR014732 (PTHR32119:PANTHER); IPR018089 (PROSITE_PATTERNS); IPR014732 (HAMAP); cd04725 (CDD); IPR011060 (SUPERFAMILY)	P:GO:0006207; P:GO:0044205; F:GO:0003824; F:GO:0004590	P:'de novo' pyrimidine nucleobase biosynthetic process; P:'de novo' UMP biosynthetic process; F:catalytic activity; F:orotidine-5'-phosphate decarboxylase activity
WP_034065165.1	MULTISPECIES: type VI secretion system-associated FHA domain protein TagH [Pseudomonas]	27	12	30	12	52.4	914	12	0	Yes	1.0256	0.553119		1.16618	0.00872811		2.3867	2.63376e-07	Up				PA0081	fha1	Fha1	fha1	1.58351	0.0173179	T	F:GO:0005515	F:protein binding			G3DSA:2.60.200.20 (GENE3D); IPR000253 (PFAM); IPR017735 (TIGRFAM); mobidb-lite (MOBIDB_LITE); mobidb-lite (MOBIDB_LITE); mobidb-lite (MOBIDB_LITE); mobidb-lite (MOBIDB_LITE); IPR000253 (PROSITE_PROFILES); IPR000253 (CDD); IPR008984 (SUPERFAMILY)	F:GO:0005515	F:protein binding
WP_003100305.1	MULTISPECIES: ribosome silencing factor [Pseudomonas]	49	6	19	6	13	523	6	0	Yes	1.10191	0.577017		-1.0954	0.693469		2.37307	0.0100723	Up	-1.44534	0.0661619		PA4005		conserved hypothetical protein	PA4005	-1.06809	0.575897	J	P:GO:0017148; P:GO:0042256; P:GO:0090071; F:GO:0043023; C:GO:0005829	P:negative regulation of translation; P:mature ribosome assembly; P:negative regulation of ribosome biogenesis; F:ribosomal large subunit binding; C:cytosol			IPR043519 (G3DSA:3.30.460.GENE3D); PF02410 (PFAM); IPR004394 (TIGRFAM); PTHR21043:SF0 (PANTHER); IPR004394 (PANTHER); IPR004394 (HAMAP); IPR043519 (SUPERFAMILY)	no GO terms	no GO terms
WP_003090443.1	MULTISPECIES: cupin domain-containing protein [Pseudomonas]	12	4	8	4	44	130	4	0	Yes	-1.05691	0.722709		-1.11656	0.451631		2.363	0.000810279	Up	1.36432	0.162545		PA2630		conserved hypothetical protein	PA2630	-1.06425	0.600765	S	P:GO:0030961; P:GO:0034720; P:GO:0043687; P:GO:0070544; F:GO:0008198; F:GO:0032453; F:GO:0051864; C:GO:0005840	P:peptidyl-arginine hydroxylation; P:histone H3-K4 demethylation; P:post-translational protein modification; P:histone H3-K36 demethylation; F:ferrous iron binding; F:histone H3-methyl-lysine-4 demethylase activity; F:histone H3-methyl-lysine-36 demethylase activity; C:ribosome	EC:1.14.11	Acting on paired donors, with incorporation or reduction of molecular oxygen. The oxygen incorporated need not be derived from O(2)	IPR003347 (PFAM); G3DSA:3.40.366.30 (GENE3D); G3DSA:2.60.120.650 (GENE3D); PTHR13096:SF8 (PANTHER); IPR039994 (PANTHER); IPR003347 (PROSITE_PROFILES); SSF51197 (SUPERFAMILY)	no GO terms	no GO terms
WP_003083830.1	MULTISPECIES: alkyl hydroperoxide reductase subunit F [Pseudomonas]	30	15	42	15	55.8	961	15	0	Yes	1.07018	0.117855		2.10275	1.28548e-06	Up	2.36132	2.9943e-06	Up	-1.26964	0.00111461		PA0140	ahpF	alkyl hydroperoxide reductase subunit F	ahpF	1.15627	0.26569	O	P:GO:0000302; P:GO:0022900; P:GO:0045454; F:GO:0008785; F:GO:0009055; F:GO:0015035; F:GO:0016651; F:GO:0051287; F:GO:0071949; C:GO:0005829; C:GO:0009321	P:response to reactive oxygen species; P:electron transport chain; P:cell redox homeostasis; F:alkyl hydroperoxide reductase activity; F:electron transfer activity; F:protein-disulfide reductase activity; F:oxidoreductase activity, acting on NAD(P)H; F:NAD binding; F:FAD binding; C:cytosol; C:alkyl hydroperoxide reductase complex	EC:1.8.1; EC:1.6	Acting on a sulfur group of donors; Acting on NADH or NADPH	Coil (COILS); PR00469 (PRINTS); PR00368 (PRINTS); IPR036188 (G3DSA:3.50.50.GENE3D); IPR012081 (PIRSF); IPR012081 (TIGRFAM); IPR012336 (PFAM); IPR036188 (G3DSA:3.50.50.GENE3D); IPR023753 (PFAM); G3DSA:3.40.30.80 (GENE3D); PTHR48105:SF6 (PANTHER); PTHR48105 (PANTHER); IPR008255 (PROSITE_PATTERNS); PS51354 (PROSITE_PROFILES); IPR044141 (CDD); IPR044142 (CDD); IPR036249 (SUPERFAMILY); IPR036188 (SUPE…	P:GO:0000302; F:GO:0008785; F:GO:0016491; F:GO:0050660; F:GO:0051287	P:response to reactive oxygen species; F:alkyl hydroperoxide reductase activity; F:oxidoreductase activity; F:flavin adenine dinucleotide binding; F:NAD binding
WP_003094337.1	MULTISPECIES: phospholipid-binding protein MlaC [Pseudomonas]	58	11	57	11	23.7	1292	11	0	Yes	1.43029	0.0011935		-1.20041	0.0240551		2.36015	0.000127804	Up	-2.23408	4.15087e-05	Lower	PA4453		putative phospholipid binding protein	PA4453	1.37533	0.000568975	Q	P:GO:0015711; P:GO:0120010; C:GO:0030288	P:organic anion transport; P:intermembrane phospholipid transfer; C:outer membrane-bounded periplasmic space			IPR008869 (PFAM); IPR008869 (PIRSF); IPR042245 (G3DSA:3.10.450.GENE3D); IPR008869 (PANTHER)	no GO terms	no GO terms
WP_003095144.1	MULTISPECIES: 2-amino-4-hydroxy-6-hydroxymethyldihydropteridine diphosphokinase [Pseudomonas]	15	2	5	2	18	231	2	0	Yes	1.12327	0.0392257		1.31937	0.00136998		2.36005	3.42572e-06	Up	1.28489	0.0355207		PA4728	folK	2-amino-4-hydroxy-6-hydroxymethyldihydropteridine pyrophosphokinase	folK	-1.62132	0.00731711	H	P:GO:0016310; P:GO:0046654; P:GO:0046656; F:GO:0000287; F:GO:0003848; F:GO:0005524; F:GO:0016301	P:phosphorylation; P:tetrahydrofolate biosynthetic process; P:folic acid biosynthetic process; F:magnesium ion binding; F:2-amino-4-hydroxy-6-hydroxymethyldihydropteridine diphosphokinase activity; F:ATP binding; F:kinase activity	EC:2.7.6.3	2-amino-4-hydroxy-6-hydroxymethyldihydropteridine diphosphokinase	IPR000550 (TIGRFAM); IPR000550 (PFAM); IPR035907 (G3DSA:3.30.70.GENE3D); PTHR43071 (PANTHER); PTHR43071:SF1 (PANTHER); IPR000550 (PROSITE_PATTERNS); IPR000550 (CDD); IPR035907 (SUPERFAMILY)	P:GO:0009396; F:GO:0003848	P:folic acid-containing compound biosynthetic process; F:2-amino-4-hydroxy-6-hydroxymethyldihydropteridine diphosphokinase activity
WP_023657506.1	MULTISPECIES: OsmC domain/YcaO domain-containing protein [Pseudomonas]	12	7	14	7	84	397	7	0	Yes	1.0423	0.294042		1.00423	0.850502		2.35998	8.07626e-08	Up										O	P:GO:0018339; F:GO:0000287; F:GO:0047693; C:GO:0005829; C:GO:0005840	P:peptidyl-L-beta-methylthioaspartic acid biosynthetic process from peptidyl-aspartic acid; F:magnesium ion binding; F:ATP diphosphatase activity; C:cytosol; C:ribosome	EC:3.6.1.8; EC:3.6.1.9	ATP diphosphatase; Nucleotide diphosphatase	G3DSA:3.30.1330.230 (GENE3D); IPR003776 (PFAM); IPR003718 (PFAM); IPR019938 (TIGRFAM); IPR015946 (G3DSA:3.30.300.GENE3D); IPR041080 (PFAM); IPR003776 (TIGRFAM); PTHR37809 (PANTHER); IPR003776 (PROSITE_PROFILES); IPR036102 (SUPERFAMILY)	no GO terms	no GO terms
WP_003091979.1	MULTISPECIES: mechanosensitive ion channel family protein [Pseudomonas]	12	6	11	6	49.3	255	6	0	Yes	1.02823	0.703155		1.05223	0.87796		2.35743	0.000263276	Up	1.14406	0.332067		PA3468		conserved hypothetical protein	PA3468	-1.11824	0.287378	M	P:GO:0034220; P:GO:0071470; F:GO:0008381; C:GO:0016021	P:ion transmembrane transport; P:cellular response to osmotic stress; F:mechanosensitive ion channel activity; C:integral component of membrane	EC:7	Translocases	IPR006685 (PFAM); IPR023408 (G3DSA:2.30.30.GENE3D); IPR030192 (PANTHER); IPR010920 (SUPERFAMILY)	P:GO:0055085; P:GO:0071470; F:GO:0008381; C:GO:0016020; C:GO:0016021	P:transmembrane transport; P:cellular response to osmotic stress; F:mechanosensitive ion channel activity; C:membrane; C:integral component of membrane
WP_003094967.1	MULTISPECIES: hypoxanthine-guanine phosphoribosyltransferase [Pseudomonas]	25	5	8	5	20.6	242	5	0	Yes	1.19552	0.248516		-1.15415	0.344195		2.35594	0.00312912	Up	-1.82341	0.00613603	Lower	PA4645		probable purine/pyrimidine phosphoribosyl transferase	PA4645	-1.20912	0.0702462	F	P:GO:0009116; F:GO:0004422; F:GO:0052657	P:nucleoside metabolic process; F:hypoxanthine phosphoribosyltransferase activity; F:guanine phosphoribosyltransferase activity	EC:2.4.2.8	Hypoxanthine phosphoribosyltransferase	IPR000836 (PFAM); IPR029057 (G3DSA:3.40.50.GENE3D); PTHR43340:SF1 (PANTHER); PTHR43340 (PANTHER); IPR000836 (CDD); IPR029057 (SUPERFAMILY)	no GO terms	no GO terms
WP_003094399.1	MULTISPECIES: Asp-tRNA(Asn)/Glu-tRNA(Gln) amidotransferase subunit GatA [Pseudomonas]	35	13	50	13	51.8	1456	13	0	Yes	-1.03168	0.542093		1.23679	0.0116021		2.35187	2.40572e-05	Up	1.03168	0.661766		PA4483	gatA	Glu-tRNA(Gln) amidotransferase subunit A	gatA	-1.03646	0.810033	J	P:GO:0006412; F:GO:0004040; F:GO:0005524; F:GO:0016740; F:GO:0050567; C:GO:0030956	P:translation; F:amidase activity; F:ATP binding; F:transferase activity; F:glutaminyl-tRNA synthase (glutamine-hydrolyzing) activity; C:glutamyl-tRNA(Gln) amidotransferase complex	EC:3.5.1.4; EC:6.3.5.7; EC:2	Amidase; Glutaminyl-tRNA synthase (glutamine-hydrolyzing); Transferases	IPR004412 (TIGRFAM); IPR023631 (PFAM); IPR036928 (G3DSA:3.90.1300.GENE3D); IPR000120 (PANTHER); PTHR11895:SF151 (PANTHER); IPR020556 (PROSITE_PATTERNS); IPR004412 (HAMAP); IPR036928 (SUPERFAMILY)	P:GO:0006412; F:GO:0003824; F:GO:0050567; C:GO:0030956	P:translation; F:catalytic activity; F:glutaminyl-tRNA synthase (glutamine-hydrolyzing) activity; C:glutamyl-tRNA(Gln) amidotransferase complex
WP_003096263.1	MULTISPECIES: PaaI family thioesterase [Pseudomonas]	12	2	3	2	13.8	88	2	0	Yes	1.15041	0.0490226		-1.20095	0.0709967		2.34869	1.47815e-05	Up	2.75968	0.0226839	Higher	PA5202		hypothetical protein	PA5202	1.02317	0.904522	Q	F:GO:0061522; C:GO:0005829	F:1,4-dihydroxy-2-naphthoyl-CoA thioesterase activity; C:cytosol	EC:3.1.2	Acting on ester bonds	G3DSA:3.10.129.10 (GENE3D); IPR006683 (PFAM); IPR003736 (TIGRFAM); PTHR43240:SF1 (PANTHER); PTHR43240 (PANTHER); cd03443 (CDD); IPR029069 (SUPERFAMILY)	no GO terms	no GO terms
WP_003119293.1	MULTISPECIES: 2-isopropylmalate synthase [Pseudomonas]	33	15	39	15	65.8	1168	15	0	Yes	1.01958	0.44407		1.85205	3.89758e-06	Up	2.34769	1.42239e-07	Up	-1.16928	0.0407045		PA3792	leuA	2-isopropylmalate synthase	leuA	1.35709	0.155545	E	P:GO:0009098; F:GO:0003852	P:leucine biosynthetic process; F:2-isopropylmalate synthase activity	EC:2.3.3.13	2-isopropylmalate synthase	IPR013709 (PFAM); IPR036230 (G3DSA:3.30.160.GENE3D); IPR013785 (G3DSA:3.20.20.GENE3D); IPR005668 (TIGRFAM); IPR000891 (PFAM); PTHR46911 (PANTHER); PTHR46911:SF1 (PANTHER); IPR002034 (PROSITE_PATTERNS); IPR002034 (PROSITE_PATTERNS); IPR005668 (HAMAP); IPR000891 (PROSITE_PROFILES); IPR039371 (CDD); SSF89000 (SUPERFAMILY); SSF51569 (SUPERFAMILY); IPR036230 (SUPERFAMILY)	P:GO:0009098; P:GO:0019752; F:GO:0003824; F:GO:0003852; F:GO:0046912	P:leucine biosynthetic process; P:carboxylic acid metabolic process; F:catalytic activity; F:2-isopropylmalate synthase activity; F:acyltransferase, acyl groups converted into alkyl on transfer
WP_019681118.1	MULTISPECIES: N4-gp56 family major capsid protein [Pseudomonas]	7	2	3	2	40.9	60	2	0	Yes	-1.57623	0.000636438	Down	1.33162	0.00574749		2.34098	0.00211837	Up										S					IPR025267 (PFAM); TIGR04387 (TIGRFAM)	no GO terms	no GO terms
WP_003094463.1	MULTISPECIES: lipid A hydroxylase LpxO [Pseudomonas]	14	3	7	3	34.7	196	3	0	Yes	0.999712	0.938659		-1.01373	0.936971		2.33237	0.00074782	Up	1.02361	0.835567		PA4512	lpxO1	lipopolysaccharide biosynthetic protein LpxO1	lpxO1	1.02174	0.855095	O	P:GO:0018193; C:GO:0016021	P:peptidyl-amino acid modification; C:integral component of membrane			IPR027443 (G3DSA:2.60.120.GENE3D); IPR007803 (PFAM); PTHR46332 (PANTHER); PTHR46332:SF5 (PANTHER); SSF51197 (SUPERFAMILY)	P:GO:0018193	P:peptidyl-amino acid modification
WP_003130409.1	MULTISPECIES: type II secretion system protein GspG [Pseudomonas]	44	5	16	5	16.1	238	5	0	Yes	1.54884	0.00198171	Up	-1.99443	0.00864065	Down	2.33209	4.94149e-05	Up	-3.17395	7.17218e-06	Lower	PA3101	xcpT	general secretion pathway protein G	xcpT	1.20827	0.148645	U	C:GO:0015627; C:GO:0016021	C:type II protein secretion system complex; C:integral component of membrane			IPR000983 (PRINTS); IPR013545 (PFAM); G3DSA:3.30.700.10 (GENE3D); IPR012902 (TIGRFAM); IPR012902 (PFAM); IPR010054 (TIGRFAM); mobidb-lite (MOBIDB_LITE); PTHR30093 (PANTHER); PTHR30093:SF33 (PANTHER); IPR012902 (PROSITE_PATTERNS); IPR045584 (SUPERFAMILY)	P:GO:0015628; C:GO:0015627	P:protein secretion by the type II secretion system; C:type II protein secretion system complex
WP_003092645.1	MULTISPECIES: signal recognition particle protein [Pseudomonas]	28	13	33	13	49.3	531	13	0	Yes	1.00469	0.905502		-1.04028	0.259089		2.32695	3.19195e-06	Up	-1.47399	0.000168069		PA3746	ffh	signal recognition particle protein Ffh	ffh	-1.26527	0.00181392	U	P:GO:0006614; P:GO:0015833; F:GO:0003924; F:GO:0005525; F:GO:0008312; F:GO:0032550; C:GO:0005618; C:GO:0005829; C:GO:0005886; C:GO:0048500	P:SRP-dependent cotranslational protein targeting to membrane; P:peptide transport; F:GTPase activity; F:GTP binding; F:7S RNA binding; F:purine ribonucleoside binding; C:cell wall; C:cytosol; C:plasma membrane; C:signal recognition particle	EC:3.6.1	Acting on acid anhydrides	Coil (COILS); IPR027417 (G3DSA:3.40.50.GENE3D); IPR036891 (G3DSA:1.10.260.GENE3D); IPR013822 (PFAM); IPR004780 (TIGRFAM); IPR004125 (PFAM); IPR000897 (PFAM); IPR042101 (G3DSA:1.20.120.GENE3D); IPR004780 (PTHR11564:PANTHER); IPR022941 (PANTHER); IPR000897 (PROSITE_PATTERNS); IPR022941 (HAMAP); cd18539 (CDD); IPR027417 (SUPERFAMILY); IPR036891 (SUPERFAMILY)	P:GO:0006614; F:GO:0003924; F:GO:0005525; F:GO:0008312; C:GO:0048500	P:SRP-dependent cotranslational protein targeting to membrane; F:GTPase activity; F:GTP binding; F:7S RNA binding; C:signal recognition particle
WP_023098509.1	MULTISPECIES: precorrin-3B C(17)-methyltransferase [Pseudomonas]	33	15	34	15	58.8	927	15	0	Yes	1.37221	9.335e-05		1.72084	3.89586e-05	Up	2.31455	5.19864e-06	Up				PA2903	cobJ	precorrin-3 methylase CobJ	cobJ	1.31574	0.152715	H	P:GO:0009236; P:GO:0032259; F:GO:0030789; C:GO:0005886	P:cobalamin biosynthetic process; P:methylation; F:precorrin-3B C17-methyltransferase activity; C:plasma membrane	EC:2.1.1.131	Precorrin-3B C(17)-methyltransferase	IPR014777 (G3DSA:3.40.1010.GENE3D); IPR014776 (G3DSA:3.30.950.GENE3D); IPR021744 (PFAM); G3DSA:3.40.50.11220 (GENE3D); IPR000878 (PFAM); IPR006363 (TIGRFAM); PTHR47036 (PANTHER); IPR006363 (CDD); IPR035996 (SUPERFAMILY); IPR038029 (SUPERFAMILY)	P:GO:0009236; F:GO:0008168	P:cobalamin biosynthetic process; F:methyltransferase activity
WP_003090942.1	MULTISPECIES: elongation factor P [Pseudomonas]	27	4	28	4	21	819	4	0	Yes	1.09492	0.0457785		-1.15916	0.011319		2.30788	2.03744e-06	Up	-1.19229	0.00352881		PA2851	efp	translation elongation factor P	efp	1.05634	0.620146	J	P:GO:0006414; F:GO:0003746; C:GO:0005737	P:translational elongation; F:translation elongation factor activity; C:cytoplasm			G3DSA:2.40.50.140 (GENE3D); IPR011768 (TIGRFAM); IPR013185 (PFAM); IPR001059 (PFAM); IPR014722 (G3DSA:2.30.30.GENE3D); G3DSA:2.40.50.140 (GENE3D); IPR020599 (PIRSF); IPR015365 (PFAM); PTHR30053:SF1 (PANTHER); IPR020599 (PANTHER); IPR011768 (HAMAP); IPR001059 (CDD); IPR015365 (CDD); IPR012340 (SUPERFAMILY); IPR008991 (SUPERFAMILY); IPR012340 (SUPERFAMILY)	P:GO:0006414; P:GO:0043043; F:GO:0003746; C:GO:0005737	P:translational elongation; P:peptide biosynthetic process; F:translation elongation factor activity; C:cytoplasm
WP_003091724.1	MULTISPECIES: DNA helicase RecQ [Pseudomonas]	17	10	29	10	79.4	773	10	0	Yes	1.04916	0.602149		1.33795	0.0556862		2.30408	2.23771e-05	Up	-1.44064	0.00420836		PA3344	recQ	ATP-dependent DNA helicase RecQ	recQ	-1.39601	0.00167798	L	P:GO:0006260; P:GO:0006281; P:GO:0006310; P:GO:0009432; P:GO:0032508; F:GO:0003677; F:GO:0005524; F:GO:0008270; F:GO:0009378; F:GO:0016887; F:GO:0017116; F:GO:0043138; C:GO:0005737; C:GO:0017117; C:GO:0030894; C:GO:0043590; C:GO:1904949	P:DNA replication; P:DNA repair; P:DNA recombination; P:SOS response; P:DNA duplex unwinding; F:DNA binding; F:ATP binding; F:zinc ion binding; F:four-way junction helicase activity; F:ATP hydrolysis activity; F:single-stranded DNA helicase activity; F:3'-5' DNA helicase activity; C:cytoplasm; C:single-stranded DNA-dependent ATP-dependent DNA helicase complex; C:replisome; C:bacterial nucleoid; C…	EC:3.6.1; EC:3.6.4.12	Acting on acid anhydrides; DNA helicase	Coil (COILS); IPR011545 (PFAM); IPR002121 (PFAM); IPR032284 (PFAM); IPR027417 (G3DSA:3.40.50.GENE3D); IPR018982 (PFAM); IPR004589 (TIGRFAM); IPR027417 (G3DSA:3.40.50.GENE3D); IPR001650 (PFAM); IPR036388 (G3DSA:1.10.10.GENE3D); IPR044876 (G3DSA:1.10.150.GENE3D); IPR006293 (TIGRFAM); PTHR13710 (PANTHER); PTHR13710:SF105 (PANTHER); IPR014001 (PROSITE_PROFILES); IPR001650 (PROSITE_PROFILES); IPR00212…	P:GO:0006260; P:GO:0006281; P:GO:0006310; P:GO:0009432; P:GO:0044237; F:GO:0000166; F:GO:0003676; F:GO:0003678; F:GO:0004386; F:GO:0005524; F:GO:0043138	P:DNA replication; P:DNA repair; P:DNA recombination; P:SOS response; P:cellular metabolic process; F:nucleotide binding; F:nucleic acid binding; F:DNA helicase activity; F:helicase activity; F:ATP binding; F:3'-5' DNA helicase activity
WP_023981117.1	MULTISPECIES: NADH:ubiquinone reductase (Na(+)-transporting) subunit F [Pseudomonas]	26	10	38	10	45.4	829	10	0	Yes	1.11171	0.0753984		-1.02546	0.616953		2.30057	2.02753e-05	Up				PA2994	nqrF	Na+-translocating NADH:quinone oxidoreductase, subunit Nqr6	nqrF	1.61284	0.033533	C	P:GO:0006814; P:GO:0022900; P:GO:0098662; F:GO:0009055; F:GO:0016655; F:GO:0046872; F:GO:0051537; F:GO:0071949; C:GO:0005886; C:GO:0016021	P:sodium ion transport; P:electron transport chain; P:inorganic cation transmembrane transport; F:electron transfer activity; F:oxidoreductase activity, acting on NAD(P)H, quinone or similar compound as acceptor; F:metal ion binding; F:2 iron, 2 sulfur cluster binding; F:FAD binding; C:plasma membrane; C:integral component of membrane	EC:1.6.5	Acting on NADH or NADPH	G3DSA:2.40.30.10 (GENE3D); IPR010205 (PIRSF); IPR008333 (PFAM); IPR010205 (TIGRFAM); IPR001433 (PFAM); IPR012675 (G3DSA:3.10.20.GENE3D); IPR001041 (PFAM); IPR039261 (G3DSA:3.40.50.GENE3D); PTHR43644 (PANTHER); IPR001041 (PROSITE_PROFILES); IPR017927 (PROSITE_PROFILES); IPR010205 (HAMAP); cd06188 (CDD); IPR001041 (CDD); IPR039261 (SUPERFAMILY); IPR036010 (SUPERFAMILY); IPR017938 (SUPERFAMILY)	P:GO:0006814; F:GO:0016491; F:GO:0016655; F:GO:0051536; F:GO:0051537; C:GO:0016021	P:sodium ion transport; F:oxidoreductase activity; F:oxidoreductase activity, acting on NAD(P)H, quinone or similar compound as acceptor; F:iron-sulfur cluster binding; F:2 iron, 2 sulfur cluster binding; C:integral component of membrane
WP_003085900.1	MULTISPECIES: phenylalanine 4-monooxygenase [Pseudomonas]	14	4	8	4	30.3	176	4	0	Yes	1.23747	0.0946813		1.06323	0.656168		2.29808	0.000979552	Up	-1.89394	0.00377718	Lower	PA0872	phhA	phenylalanine-4-hydroxylase	phhA	-1.07022	0.779821	E	P:GO:0006559; F:GO:0004505; F:GO:0005506	P:L-phenylalanine catabolic process; F:phenylalanine 4-monooxygenase activity; F:iron ion binding	EC:1.14.16.1	Phenylalanine 4-monooxygenase	IPR019774 (PRINTS); IPR005960 (TIGRFAM); IPR019774 (PFAM); IPR036951 (G3DSA:1.10.800.GENE3D); PTHR11473:SF24 (PANTHER); IPR001273 (PANTHER); IPR018301 (PROSITE_PATTERNS); IPR019774 (PROSITE_PROFILES); IPR005960 (CDD); IPR036329 (SUPERFAMILY)	P:GO:0006559; P:GO:0009072; F:GO:0004497; F:GO:0004505; F:GO:0005506; F:GO:0016714	P:L-phenylalanine catabolic process; P:aromatic amino acid family metabolic process; F:monooxygenase activity; F:phenylalanine 4-monooxygenase activity; F:iron ion binding; F:oxidoreductase activity, acting on paired donors, with incorporation or reduction of molecular oxygen, reduced pteridine as one donor, and incorporation of one atom of oxygen
WP_003084521.1	MULTISPECIES: tRNA (guanosine(46)-N7)-methyltransferase TrmB [Pseudomonas]	31	7	15	7	27.6	359	7	0	Yes	1.04394	0.433954		1.15956	0.00590024		2.29565	3.80666e-06	Up										J	P:GO:0106004; F:GO:0008176; C:GO:0043527	P:tRNA (guanine-N7)-methylation; F:tRNA (guanine-N7-)-methyltransferase activity; C:tRNA methyltransferase complex	EC:2.1.1.33	tRNA (guanine(46)-N(7))-methyltransferase	IPR003358 (PFAM); G3DSA:3.40.50.150 (GENE3D); IPR003358 (TIGRFAM); mobidb-lite (MOBIDB_LITE); IPR003358 (PANTHER); PTHR23417:SF14 (PANTHER); IPR003358 (PROSITE_PROFILES); IPR003358 (HAMAP); cd02440 (CDD); IPR029063 (SUPERFAMILY)	P:GO:0006400; F:GO:0008176	P:tRNA modification; F:tRNA (guanine-N7-)-methyltransferase activity
WP_003093895.1	MULTISPECIES: DUF4350 domain-containing protein [Pseudomonas]	23	10	22	10	47.9	600	10	0	Yes	1.01541	0.801299		1.06629	0.343743		2.29379	7.24969e-05	Up										M					IPR025646 (PFAM); mobidb-lite (MOBIDB_LITE)	no GO terms	no GO terms
WP_003091137.1	MULTISPECIES: 3-oxoacyl-ACP reductase FabG [Pseudomonas]	57	10	66	10	25.6	2435	10	0	Yes	1.02115	0.61623		1.16858	0.0136412		2.29124	4.43104e-06	Up	-1.06737	0.187511		PA2967	fabG	3-oxoacyl-[acyl-carrier-protein] reductase	fabG	1.42325	0.0343809	IQ	P:GO:0030497; F:GO:0004316; F:GO:0050661; F:GO:0051287	P:fatty acid elongation; F:3-oxoacyl-[acyl-carrier-protein] reductase (NADPH) activity; F:NADP binding; F:NAD binding	EC:2.3.1.85; EC:1.1.1.100	Fatty-acid synthase system; 3-oxoacyl-[acyl-carrier-protein] reductase	IPR002347 (PRINTS); IPR002347 (PRINTS); G3DSA:3.40.50.720 (GENE3D); IPR011284 (TIGRFAM); PF13561 (PFAM); PTHR42760:SF96 (PANTHER); PTHR42760 (PANTHER); IPR020904 (PROSITE_PATTERNS); cd05333 (CDD); IPR036291 (SUPERFAMILY)	P:GO:0006633; F:GO:0004316; F:GO:0016491; F:GO:0051287	P:fatty acid biosynthetic process; F:3-oxoacyl-[acyl-carrier-protein] reductase (NADPH) activity; F:oxidoreductase activity; F:NAD binding
WP_014603560.1	MULTISPECIES: RNA 3'-terminal phosphate cyclase [Pseudomonas]	27	6	13	6	36.6	480	6	0	Yes	1.26538	0.127974		1.412	0.0271662		2.28375	0.000522655	Up	1.62861	0.00633716	Higher	PA4585	rtcA	RNA 3'-terminal phosphate cyclase	rtcA	-2.89447	9.95e-06	A	P:GO:0006396; F:GO:0003963; F:GO:0005524; C:GO:0005737	P:RNA processing; F:RNA-3'-phosphate cyclase activity; F:ATP binding; C:cytoplasm	EC:6.5.1.4	RNA 3'-terminal-phosphate cyclase (ATP)	IPR017770 (TIGRFAM); IPR000228 (PIRSF); IPR036553 (G3DSA:3.30.360.GENE3D); IPR013791 (PFAM); IPR023797 (PFAM); IPR037136 (G3DSA:3.65.10.GENE3D); IPR000228 (PANTHER); IPR017770 (PTHR11096:PANTHER); IPR020719 (PROSITE_PATTERNS); IPR017770 (HAMAP); cd00874 (CDD); IPR013792 (SUPERFAMILY); IPR013792 (SUPERFAMILY); IPR036553 (SUPERFAMILY)	P:GO:0006396; F:GO:0003824; F:GO:0003963	P:RNA processing; F:catalytic activity; F:RNA-3'-phosphate cyclase activity
WP_003085808.1	MULTISPECIES: OmpA family protein [Pseudomonas]	49	7	63	7	24.7	2068	7	0	Yes	-1.04972	0.178242		1.11053	0.0163592		2.28289	4.60514e-07	Up	-1.59605	1.95512e-05	Lower	PA0833		hypothetical protein	PA0833	1.19037	0.189618	M	C:GO:0009279; C:GO:0016021	C:cell outer membrane; C:integral component of membrane			IPR006664 (PRINTS); IPR006665 (PFAM); IPR039567 (PFAM); IPR036737 (G3DSA:3.30.1330.GENE3D); mobidb-lite (MOBIDB_LITE); mobidb-lite (MOBIDB_LITE); PTHR30128:SF54 (PANTHER); PTHR30128 (PANTHER); IPR006665 (PROSITE_PROFILES); PS51257 (PROSITE_PROFILES); IPR006665 (CDD); IPR036737 (SUPERFAMILY)	C:GO:0016021	C:integral component of membrane
WP_003085968.1	MULTISPECIES: alanine--tRNA ligase [Pseudomonas]	39	31	163	31	94.7	4279	31	0	Yes	1.05645	0.133629		-1.04765	0.0951941		2.28	8.86568e-07	Up	-1.06452	0.105235		PA0903	alaS	alanyl-tRNA synthetase	alaS	-1.07479	0.491703	J	P:GO:0006400; P:GO:0006419; P:GO:0010629; P:GO:0045892; P:GO:0106074; F:GO:0000049; F:GO:0001217; F:GO:0002196; F:GO:0004813; F:GO:0005524; F:GO:0008270; F:GO:0016597; F:GO:0042802; C:GO:0005829	P:tRNA modification; P:alanyl-tRNA aminoacylation; P:negative regulation of gene expression; P:negative regulation of transcription, DNA-templated; P:aminoacyl-tRNA metabolism involved in translational fidelity; F:tRNA binding; F:DNA-binding transcription repressor activity; F:Ser-tRNA(Ala) hydrolase activity; F:alanine-tRNA ligase activity; F:ATP binding; F:zinc ion binding; F:amino acid binding…	EC:6.1.1.7; EC:3.1.1.1	Alanine--tRNA ligase; Carboxylesterase	Coil (COILS); Coil (COILS); Coil (COILS); IPR002318 (PRINTS); G3DSA:3.30.54.20 (GENE3D); IPR012947 (PFAM); G3DSA:3.30.980.10 (GENE3D); IPR003156 (PFAM); IPR018164 (PFAM); G3DSA:3.10.310.40 (GENE3D); IPR002318 (TIGRFAM); IPR045864 (G3DSA:3.30.930.GENE3D); G3DSA:2.40.30.130 (GENE3D); G3DSA:6.10.250.550 (GENE3D); PTHR11777 (PANTHER); IPR023033 (HAMAP); IPR018165 (PROSITE_PROFILES); cd00673 (CDD); IP…	P:GO:0006419; P:GO:0043039; F:GO:0000166; F:GO:0003676; F:GO:0004812; F:GO:0004813; F:GO:0005524; C:GO:0005737	P:alanyl-tRNA aminoacylation; P:tRNA aminoacylation; F:nucleotide binding; F:nucleic acid binding; F:aminoacyl-tRNA ligase activity; F:alanine-tRNA ligase activity; F:ATP binding; C:cytoplasm
WP_003108028.1	MULTISPECIES: transcription termination/antitermination protein NusG [Pseudomonas]	53	6	26	6	20.1	527	6	0	Yes	1.22374	0.00874634		1.14031	0.0193755		2.25612	2.00731e-06	Up	-1.21793	0.0452682		PA4275	nusG	transcription antitermination protein NusG	nusG	-1.13219	0.426604	K	P:GO:0031564; P:GO:0032784; C:GO:0005618; C:GO:0005829; C:GO:0005886	P:transcription antitermination; P:regulation of DNA-templated transcription, elongation; C:cell wall; C:cytosol; C:plasma membrane			IPR001062 (PRINTS); IPR014722 (G3DSA:2.30.30.GENE3D); IPR001062 (TIGRFAM); IPR036735 (G3DSA:3.30.70.GENE3D); IPR006645 (PFAM); IPR005824 (PFAM); IPR001062 (PTHR30265:PANTHER); IPR043425 (PANTHER); IPR015869 (PROSITE_PATTERNS); IPR001062 (HAMAP); cd06091 (CDD); cd09891 (CDD); IPR036735 (SUPERFAMILY); IPR008991 (SUPERFAMILY)	P:GO:0006355; P:GO:0032784	P:regulation of transcription, DNA-templated; P:regulation of DNA-templated transcription, elongation
WP_003086565.1	MULTISPECIES: lytic murein transglycosylase [Pseudomonas]	35	12	24	12	42.6	637	12	0	Yes	1.23031	0.00660832		-1.27425	0.00830117		2.2477	5.10144e-06	Up				PA1171	sltB2	SltB2	PA1171	1.08964	0.344931	M	F:GO:0016829	F:lyase activity	EC:4	Lyases	G3DSA:1.10.530.10 (GENE3D); IPR002477 (PFAM); G3DSA:1.10.8.350 (GENE3D); IPR031304 (PFAM); IPR036366 (G3DSA:1.10.101.GENE3D); IPR011970 (TIGRFAM); IPR043426 (PANTHER); cd13399 (CDD); IPR036365 (SUPERFAMILY); IPR023346 (SUPERFAMILY)	no GO terms	no GO terms
WP_003085587.1	MULTISPECIES: TonB-dependent receptor [Pseudomonas]	10	6	8	6	74.2	220	6	0	Yes	-1.11389	0.296105		1.15586	0.596712		2.23928	0.000508644	Up	-1.17286	0.224449		PA0781		hypothetical protein	PA0781	-1.33629	0.211062	P	P:GO:0033214; P:GO:0044718; F:GO:0015344; C:GO:0016021; C:GO:0031230	P:siderophore-dependent iron import into cell; P:siderophore transmembrane transport; F:siderophore uptake transmembrane transporter activity; C:integral component of membrane; C:intrinsic component of cell outer membrane	EC:7	Translocases	IPR036942 (G3DSA:2.40.170.GENE3D); IPR000531 (PFAM); IPR037066 (G3DSA:2.170.130.GENE3D); IPR012910 (PFAM); mobidb-lite (MOBIDB_LITE); mobidb-lite (MOBIDB_LITE); mobidb-lite (MOBIDB_LITE); mobidb-lite (MOBIDB_LITE); IPR039426 (PANTHER); PTHR30069:SF40 (PANTHER); cd01347 (CDD); SSF56935 (SUPERFAMILY)	no GO terms	no GO terms
WP_003140910.1	MULTISPECIES: DEAD/DEAH box helicase [Pseudomonas]	12	8	12	8	75	268	8	0	Yes	1.1443	0.00474543		1.23402	0.00273266		2.22991	8.80939e-05	Up	-1.30991	0.00357784		PA0799		probable helicase	PA0799	-1.21487	0.0790898	KL	F:GO:0004386; F:GO:0005524; F:GO:0140658	F:helicase activity; F:ATP binding; F:ATP-dependent chromatin remodeler activity			IPR000330 (PFAM); IPR038718 (G3DSA:3.40.50.GENE3D); IPR027417 (G3DSA:3.40.50.GENE3D); IPR001650 (PFAM); PTHR10799:SF987 (PANTHER); PTHR10799 (PANTHER); IPR014001 (PROSITE_PROFILES); IPR001650 (PROSITE_PROFILES); cd18012 (CDD); cd18793 (CDD); IPR027417 (SUPERFAMILY); IPR027417 (SUPERFAMILY)	F:GO:0005524; F:GO:0140658	F:ATP binding; F:ATP-dependent chromatin remodeler activity
WP_003083664.1	MULTISPECIES: type VI secretion system protein TssA [Pseudomonas]	35	11	39	11	36.7	1170	11	0	Yes	1.00218	0.981212		-1.03769	0.623636		2.22285	9.96817e-05	Up	2.24826	8.82115e-05	Higher	PA0082	tssA1	TssA1	PA0082	1.82341	0.00545588	S	C:GO:0033104	C:type VI protein secretion system complex			IPR010657 (PFAM); IPR017740 (TIGRFAM); IPR017740 (PANTHER)	no GO terms	no GO terms
WP_025324781.1	Rha family transcriptional regulator [Pseudomonas aeruginosa]	22	5	7	5	30.8	192	5	0	Yes	1.14199	0.287158		1.36494	0.0355292		2.21791	0.00155797	Up										S					IPR014054 (PFAM); IPR014054 (TIGRFAM); mobidb-lite (MOBIDB_LITE)	no GO terms	no GO terms
WP_003083624.1	MULTISPECIES: YheV family putative metal-binding protein [Pseudomonas]	25	2	3	2	10	45	2	0	Yes	-1.35656	0.176332		-1.47735	0.069102		2.20807	0.00476079	Up	-1.92741	0.00887863	Lower	PA0068		hypothetical protein	PA0068	1.33169	0.143817	S	F:GO:0003677	F:DNA binding			IPR012658 (PFAM); IPR012658 (TIGRFAM); mobidb-lite (MOBIDB_LITE); mobidb-lite (MOBIDB_LITE)	no GO terms	no GO terms
WP_003095193.1	MULTISPECIES: ribosome maturation factor RimP [Pseudomonas]	9	2	4	2	17.2	86	2	0	Yes	-1.02004	0.673183		-1.14313	0.237294		2.19347	0.00347654	Up	-1.42025	0.0391313		PA4746		conserved hypothetical protein	PA4746	-1.41599	0.000604322	S	P:GO:0000028; P:GO:0006412; C:GO:0005829; C:GO:0005886	P:ribosomal small subunit assembly; P:translation; C:cytosol; C:plasma membrane			IPR028998 (PFAM); G3DSA:2.30.30.180 (GENE3D); IPR035956 (G3DSA:3.30.300.GENE3D); IPR028989 (PFAM); IPR003728 (PANTHER); IPR003728 (HAMAP); IPR028998 (CDD); IPR035956 (SUPERFAMILY); IPR036847 (SUPERFAMILY)	P:GO:0042274	P:ribosomal small subunit biogenesis
WP_003093949.1	MULTISPECIES: YceI family protein [Pseudomonas]	13	3	5	3	20.9	118	3	0	Yes	1.17832	0.110679		-1.02563	0.763167		2.19264	0.000155562	Up	-2.36001	0.00046218	Lower	PA4340		hypothetical protein	PA4340	-1.00488	0.957179	S					IPR027016 (PIRSF); IPR007372 (PFAM); IPR036761 (G3DSA:2.40.128.GENE3D); IPR036761 (SUPERFAMILY)	no GO terms	no GO terms
WP_003111417.1	MULTISPECIES: peptidoglycan-associated lipoprotein Pal [Pseudomonas]	48	5	59	5	17.9	1511	5	0	Yes	2.81191	0.000341238	Up	2.88941	0.000247809	Up	2.19187	0.00116736	Up	-3.25047	3.26092e-05	Lower	PA0973	oprL	Peptidoglycan associated lipoprotein OprL precursor	oprL	1.71758	0.00296178	M	P:GO:0007049; P:GO:0051301; C:GO:0016021; C:GO:0031246; C:GO:0032153	P:cell cycle; P:cell division; C:integral component of membrane; C:intrinsic component of periplasmic side of cell outer membrane; C:cell division site			IPR006664 (PRINTS); IPR014169 (TIGRFAM); IPR006665 (PFAM); IPR036737 (G3DSA:3.30.1330.GENE3D); mobidb-lite (MOBIDB_LITE); PTHR30128 (PANTHER); PTHR30128:SF32 (PANTHER); IPR006690 (PROSITE_PATTERNS); IPR006665 (PROSITE_PROFILES); PS51257 (PROSITE_PROFILES); IPR039001 (HAMAP); IPR006665 (CDD); IPR036737 (SUPERFAMILY)	P:GO:0051301; C:GO:0009279; C:GO:0016021	P:cell division; C:cell outer membrane; C:integral component of membrane
WP_003094155.1	MULTISPECIES: stringent starvation protein A [Pseudomonas]	17	3	8	3	23.6	221	3	0	Yes	1.20558	0.0440074		1.24169	0.0280956		2.18465	0.000244463	Up	-1.59417	0.00144674	Lower	PA4428	sspA	stringent starvation protein A	sspA	1.1247	0.234788	O	P:GO:0006749; P:GO:0010628; P:GO:0042594; P:GO:0045893; F:GO:0005515; C:GO:0005829	P:glutathione metabolic process; P:positive regulation of gene expression; P:response to starvation; P:positive regulation of transcription, DNA-templated; F:protein binding; C:cytosol			G3DSA:1.20.1050.10 (GENE3D); G3DSA:3.40.30.10 (GENE3D); IPR004045 (PFAM); IPR004046 (PFAM); SFLDG00358 (SFLD); IPR040079 (SFLD); PTHR43968 (PANTHER); PTHR43968:SF6 (PANTHER); IPR004045 (PROSITE_PROFILES); IPR010987 (PROSITE_PROFILES); PS51354 (PROSITE_PROFILES); IPR034342 (CDD); IPR034341 (CDD); IPR036249 (SUPERFAMILY); IPR036282 (SUPERFAMILY)	P:GO:0006749; F:GO:0005515	P:glutathione metabolic process; F:protein binding
WP_003090838.1	MULTISPECIES: DUF3592 domain-containing protein [Pseudomonas]	26	2	5	2	15	117	2	0	Yes	-1.14424	0.553674		-1.45777	0.103378		2.18447	0.00672152	Up				PA2775	tsi4	Tsi4	PA2775	1.02542	0.792694	S	C:GO:0016021	C:integral component of membrane			IPR021994 (PFAM)	no GO terms	no GO terms
WP_044059460.1	integrase family protein [Pseudomonas aeruginosa]	20	8	10	8	49.9	220	8	0	Yes	1.289	0.05911		1.54577	0.00968128	Up	2.18285	0.0015071	Up										L	P:GO:0006310; P:GO:0015074; F:GO:0003677	P:DNA recombination; P:DNA integration; F:DNA binding			IPR038488 (G3DSA:3.30.160.GENE3D); IPR002104 (PFAM); IPR013762 (G3DSA:1.10.443.GENE3D); IPR025166 (PFAM); IPR010998 (G3DSA:1.10.150.GENE3D); PTHR30629 (PANTHER); IPR002104 (PROSITE_PROFILES); IPR011010 (SUPERFAMILY)	P:GO:0006310; P:GO:0015074; F:GO:0003677	P:DNA recombination; P:DNA integration; F:DNA binding
WP_003093897.1	MULTISPECIES: DUF58 domain-containing protein [Pseudomonas]	7	3	5	3	50.3	137	3	0	Yes	-1.14241	0.0891999		1.16771	0.0920262		2.17847	5.0858e-05	Up	1.08648	0.291577		PA4323		hypothetical protein	PA4323	1.56214	0.0206129	S	C:GO:0016021	C:integral component of membrane			IPR002881 (PFAM); IPR036465 (G3DSA:3.40.50.GENE3D); PTHR33608 (PANTHER); PTHR33608:SF3 (PANTHER); cd00198 (CDD); IPR036465 (SUPERFAMILY)	no GO terms	no GO terms
WP_003095194.1	MULTISPECIES: preprotein translocase subunit SecG [Pseudomonas]	59	3	17	3	13.2	808	3	0	Yes	1.05502	0.668899		-1.28875	0.130321		2.17496	0.000874707	Up	-1.10148	0.340796		PA4747	secG	secretion protein SecG	secG	1.01949	0.871406	U	P:GO:0006616; P:GO:0009306; P:GO:0015833; P:GO:0032978; P:GO:0043952; F:GO:0015450; F:GO:1904680; C:GO:0005886; C:GO:0016021	P:SRP-dependent cotranslational protein targeting to membrane, translocation; P:protein secretion; P:peptide transport; P:protein insertion into membrane from inner side; P:protein transport by the Sec complex; F:protein-transporting ATPase activity; F:peptide transmembrane transporter activity; C:plasma membrane; C:integral component of membrane	EC:7	Translocases	IPR004692 (PRINTS); IPR004692 (PFAM); IPR004692 (TIGRFAM); mobidb-lite (MOBIDB_LITE); IPR004692 (PANTHER)	P:GO:0009306; F:GO:0015450; C:GO:0016021	P:protein secretion; F:protein-transporting ATPase activity; C:integral component of membrane
WP_003096771.1	MULTISPECIES: hypothetical protein [Pseudomonas]	9	6	9	6	89.9	151	6	0	Yes	1.19814	0.0819353		1.51916	0.000740301	Up	2.17275	3.65746e-06	Up				PA5412		hypothetical protein	PA5412	1.22986	0.129953		C:GO:0016021	C:integral component of membrane			no IPS match	no IPS match	no IPS match
WP_003094595.1	MULTISPECIES: flavodoxin [Pseudomonas]	17	12	19	12	94.2	502	12	0	Yes	0.995327	0.906391		1.37216	0.0018374		2.16889	0.000142862	Up	1.28639	0.00837765		PA4513		probable oxidoreductase	PA4513	1.46272	0.00375665	P	F:GO:0010181; F:GO:0016491; C:GO:0016021	F:FMN binding; F:oxidoreductase activity; C:integral component of membrane	EC:1	Oxidoreductases	IPR001094 (PRINTS); IPR001709 (PRINTS); IPR008254 (PFAM); IPR029039 (G3DSA:3.40.50.GENE3D); IPR005625 (PFAM); IPR001433 (PFAM); IPR039261 (G3DSA:3.40.50.GENE3D); PTHR19384 (PANTHER); PTHR19384:SF87 (PANTHER); IPR008254 (PROSITE_PROFILES); IPR017927 (PROSITE_PROFILES); cd06200 (CDD); IPR029039 (SUPERFAMILY); IPR039261 (SUPERFAMILY); IPR017938 (SUPERFAMILY)	F:GO:0010181; F:GO:0016491	F:FMN binding; F:oxidoreductase activity
WP_003094326.1	MULTISPECIES: histidinol dehydrogenase [Pseudomonas]	55	20	75	20	47.2	2150	20	0	Yes	1.01769	0.550137		1.23753	0.0025217		2.16821	2.10228e-05	Up	-1.1772	0.00411746		PA4448	hisD	histidinol dehydrogenase	hisD	-1.09897	0.400574	E	P:GO:0000105; P:GO:0018130; P:GO:0019438; P:GO:0052803; P:GO:1901362; P:GO:1901607; F:GO:0004399; F:GO:0008270; F:GO:0030145; F:GO:0051287; C:GO:0005829	P:histidine biosynthetic process; P:heterocycle biosynthetic process; P:aromatic compound biosynthetic process; P:imidazole-containing compound metabolic process; P:organic cyclic compound biosynthetic process; P:alpha-amino acid biosynthetic process; F:histidinol dehydrogenase activity; F:zinc ion binding; F:manganese ion binding; F:NAD binding; C:cytosol	EC:1.1.1.23	Histidinol dehydrogenase	IPR012131 (PRINTS); G3DSA:1.20.5.1300 (GENE3D); IPR012131 (TIGRFAM); G3DSA:3.40.50.1980 (GENE3D); IPR022695 (PIRSF); IPR012131 (PFAM); G3DSA:3.40.50.1980 (GENE3D); IPR012131 (PANTHER); PTHR21256:SF2 (PANTHER); IPR001692 (PROSITE_PATTERNS); IPR012131 (HAMAP); IPR012131 (CDD); IPR016161 (SUPERFAMILY)	P:GO:0000105; F:GO:0004399; F:GO:0016491; F:GO:0016616; F:GO:0046872; F:GO:0051287	P:histidine biosynthetic process; F:histidinol dehydrogenase activity; F:oxidoreductase activity; F:oxidoreductase activity, acting on the CH-OH group of donors, NAD or NADP as acceptor; F:metal ion binding; F:NAD binding
WP_003094019.1	MULTISPECIES: DUF1513 domain-containing protein [Pseudomonas]	12	4	7	4	40	117	4	0	Yes	1.18026	0.0477852		-1.02203	0.525886		2.16286	2.94157e-08	Up	1.64882	0.00975019	Higher	PA4373		hypothetical protein	PA4373	1.46844	0.0282016	S	F:GO:0005515	F:protein binding			IPR015943 (G3DSA:2.130.10.GENE3D); IPR008311 (PIRSF); IPR008311 (PFAM); IPR011044 (SUPERFAMILY)	F:GO:0005515	F:protein binding
WP_003082116.1	MULTISPECIES: hypothetical protein [Pseudomonas]	27	18	56	18	86	1774	18	0	Yes	1.28705	0.00921168		1.11512	0.0895845		2.16183	1.94865e-05	Up	1.01773	0.803563		PA1069		hypothetical protein	PA1069	2.67159	2.3e-20	O	F:GO:0005515	F:protein binding			IPR011990 (G3DSA:1.25.40.GENE3D); IPR011990 (G3DSA:1.25.40.GENE3D); IPR011990 (SUPERFAMILY); IPR011990 (SUPERFAMILY)	F:GO:0005515	F:protein binding
WP_003092594.1	MULTISPECIES: YaeQ family protein [Pseudomonas]	26	4	8	4	20.6	184	4	0	Yes	1.10032	0.279696		-1.32012	0.0348433		2.15911	0.000937781	Up	-1.37061	0.016298		PA3726		conserved hypothetical protein	PA3726	-1.26104	0.00481989	S					IPR009822 (PFAM); IPR009822 (PIRSF); IPR038590 (G3DSA:3.10.640.GENE3D); IPR009822 (PANTHER); IPR011335 (SUPERFAMILY)	no GO terms	no GO terms
WP_010895661.1	MULTISPECIES: peptide chain release factor 2 [Pseudomonas]	35	12	42	12	41.1	1325	12	0	Yes	1.13318	0.0228379		1.09322	0.0655626		2.1559	2.47219e-05	Up	-1.26792	0.00161802		PA3701	prfB	peptide chain release factor 2	prfB	-1.23321	0.062959	J	P:GO:0006415; F:GO:0016149; C:GO:0005829	P:translational termination; F:translation release factor activity, codon specific; C:cytosol			Coil (COILS); IPR005139 (PFAM); G3DSA:3.30.70.1660 (GENE3D); G3DSA:3.30.160.20 (GENE3D); IPR000352 (PFAM); IPR004374 (TIGRFAM); G3DSA:1.20.58.410 (GENE3D); PTHR43116 (PANTHER); PTHR43116:SF3 (PANTHER); IPR000352 (PROSITE_PATTERNS); IPR004374 (HAMAP); IPR045853 (SUPERFAMILY)	P:GO:0006415; F:GO:0003747; F:GO:0016149; C:GO:0005737	P:translational termination; F:translation release factor activity; F:translation release factor activity, codon specific; C:cytoplasm
WP_003091139.1	MULTISPECIES: ACP S-malonyltransferase [Pseudomonas]	21	5	20	5	32.4	697	5	0	Yes	1.13571	0.130843		-1.10926	0.219321		2.15489	0.00103778	Up	-1.51015	0.00251355	Lower	PA2968	fabD	malonyl-CoA-[acyl-carrier-protein] transacylase	fabD	-1.20148	0.157563	I	P:GO:0006633; F:GO:0004314; C:GO:0005829	P:fatty acid biosynthetic process; F:[acyl-carrier-protein] S-malonyltransferase activity; C:cytosol	EC:2.3.1.85; EC:2.3.1.39	Fatty-acid synthase system; [Acyl-carrier-protein] S-malonyltransferase	IPR004410 (TIGRFAM); IPR014043 (PFAM); IPR001227 (G3DSA:3.40.366.GENE3D); IPR024925 (PIRSF); G3DSA:3.30.70.250 (GENE3D); PTHR42681 (PANTHER); IPR016035 (SUPERFAMILY); IPR016036 (SUPERFAMILY)	F:GO:0004314; F:GO:0016740	F:[acyl-carrier-protein] S-malonyltransferase activity; F:transferase activity
WP_003091088.1	MULTISPECIES: trans-2-enoyl-CoA reductase family protein [Pseudomonas]	39	14	57	14	43.5	1530	14	0	Yes	1.23181	0.012355		1.23798	0.0089021		2.14797	0.000233886	Up	-1.60337	0.000204821	Lower	PA2950	fabV	FabV	PA2950	1.10005	0.440727	I	P:GO:0006633; F:GO:0004318; F:GO:0016631; F:GO:0050343; F:GO:0051287	P:fatty acid biosynthetic process; F:enoyl-[acyl-carrier-protein] reductase (NADH) activity; F:enoyl-[acyl-carrier-protein] reductase activity; F:trans-2-enoyl-CoA reductase (NAD+) activity; F:NAD binding	EC:2.3.1.85; EC:1.3.1.9; EC:1.3.1.44	Fatty-acid synthase system; Enoyl-[acyl-carrier-protein] reductase (NADH); Trans-2-enoyl-CoA reductase (NAD(+))	IPR024910 (PFAM); G3DSA:3.40.50.720 (GENE3D); IPR010758 (PFAM); IPR024906 (PFAM); IPR010758 (PANTHER); IPR010758 (HAMAP)	F:GO:0016491	F:oxidoreductase activity
WP_003094120.1	MULTISPECIES: D-alanine--D-alanine ligase [Pseudomonas]	22	7	23	7	34.3	602	7	0	Yes	1.09957	0.0592049		1.53508	7.87922e-05	Up	2.14777	4.07288e-06	Up	-1.34231	0.00067566		PA4410	ddlB	D-alanine--D-alanine ligase	ddlB	1.61474	3.83e-13	F	P:GO:0008360; P:GO:0071555; F:GO:0005524; F:GO:0008716; F:GO:0046872; C:GO:0005829	P:regulation of cell shape; P:cell wall organization; F:ATP binding; F:D-alanine-D-alanine ligase activity; F:metal ion binding; C:cytosol	EC:6.3.2.4	D-alanine--D-alanine ligase	IPR011127 (PFAM); IPR005905 (PIRSF); IPR005905 (TIGRFAM); IPR011095 (PFAM); G3DSA:3.30.470.20 (GENE3D); IPR013815 (G3DSA:3.30.1490.GENE3D); G3DSA:3.40.50.20 (GENE3D); PTHR23132 (PANTHER); PTHR23132:SF23 (PANTHER); IPR000291 (PROSITE_PATTERNS); IPR000291 (PROSITE_PATTERNS); IPR011761 (PROSITE_PROFILES); IPR005905 (HAMAP); SSF56059 (SUPERFAMILY); IPR016185 (SUPERFAMILY)	F:GO:0005524; F:GO:0008716; F:GO:0046872; C:GO:0005737	F:ATP binding; F:D-alanine-D-alanine ligase activity; F:metal ion binding; C:cytoplasm
WP_014604144.1	MULTISPECIES: ribonuclease P protein component [Pseudomonas]	33	3	7	3	15.3	560	3	0	Yes	-1.10593	0.348011		1.07297	0.60097		2.14343	0.00101346	Up	1.10135	0.400339		PA5569	rnpA	ribonuclease P protein component	rnpA	-1.53371	0.00221936	J	P:GO:0001682; P:GO:0034414; F:GO:0000049; F:GO:0004526; F:GO:0031404; F:GO:0033204; F:GO:0042301; F:GO:0042781; F:GO:0043199; C:GO:0030677; C:GO:1905348	P:tRNA 5'-leader removal; P:tRNA 3'-trailer cleavage, endonucleolytic; F:tRNA binding; F:ribonuclease P activity; F:chloride ion binding; F:ribonuclease P RNA binding; F:phosphate ion binding; F:3'-tRNA processing endoribonuclease activity; F:sulfate binding; C:ribonuclease P complex; C:endonuclease complex	EC:3.1.30; EC:3.1.26.11; EC:3.1.26.5	Acting on ester bonds; Ribonuclease Z; Ribonuclease P	IPR000100 (PFAM); IPR014721 (G3DSA:3.30.230.GENE3D); IPR000100 (TIGRFAM); IPR000100 (PANTHER); IPR020539 (PROSITE_PATTERNS); IPR000100 (HAMAP); IPR020568 (SUPERFAMILY)	P:GO:0008033; F:GO:0000049; F:GO:0004526	P:tRNA processing; F:tRNA binding; F:ribonuclease P activity
WP_003096011.1	MULTISPECIES: tRNA 4-thiouridine(8) synthase ThiI [Pseudomonas]	15	8	18	8	54.8	380	8	0	Yes	1.01242	0.798132		1.05502	0.229353		2.13845	4.35012e-06	Up	-1.27938	0.0063788		PA5118	thiI	thiazole biosynthesis protein ThiI	thiI	-1.72104	2.15e-05	HP	P:GO:0002937; P:GO:0006805; P:GO:0009228; P:GO:0009229; P:GO:0052837; F:GO:0000049; F:GO:0004810; F:GO:0005524; F:GO:0016783; C:GO:0005829	P:tRNA 4-thiouridine biosynthesis; P:xenobiotic metabolic process; P:thiamine biosynthetic process; P:thiamine diphosphate biosynthetic process; P:thiazole biosynthetic process; F:tRNA binding; F:tRNA adenylyltransferase activity; F:ATP binding; F:sulfurtransferase activity; C:cytosol	EC:2.8.1; EC:2.7.7.72; EC:2.7.7.19	Transferring sulfur-containing groups; CCA tRNA nucleotidyltransferase; Polynucleotide adenylyltransferase	Coil (COILS); IPR004114 (PFAM); IPR020536 (PFAM); IPR026340 (TIGRFAM); IPR036873 (G3DSA:3.40.250.GENE3D); IPR014729 (G3DSA:3.40.50.GENE3D); G3DSA:3.30.2130.30 (GENE3D); IPR003720 (TIGRFAM); PTHR43209 (PANTHER); IPR004114 (PROSITE_PROFILES); IPR001763 (PROSITE_PROFILES); IPR003720 (HAMAP); cd11716 (CDD); IPR020536 (CDD); SSF143437 (SUPERFAMILY); SSF52402 (SUPERFAMILY); IPR036873 (SUPERFAMILY)	P:GO:0034227; P:GO:0052837; F:GO:0003723; F:GO:0004810; F:GO:0016783	P:tRNA thio-modification; P:thiazole biosynthetic process; F:RNA binding; F:tRNA adenylyltransferase activity; F:sulfurtransferase activity
WP_003129773.1	MULTISPECIES: tRNA preQ1(34) S-adenosylmethionine ribosyltransferase-isomerase QueA [Pseudomonas]	15	5	11	5	38.1	444	5	0	Yes	-1.10109	0.34311		1.05415	0.756987		2.13277	0.0030293	Up	-1.05278	0.864839		PA3824	queA	S-adenosylmethionine:trna ribosyltransferase-isomerase	queA	-2.18668	3.61e-11	J	P:GO:0002099; P:GO:0008616; P:GO:0009314; F:GO:0051075; C:GO:0005829	P:tRNA wobble guanine modification; P:queuosine biosynthetic process; P:response to radiation; F:S-adenosylmethionine:tRNA ribosyltransferase-isomerase activity; C:cytosol	EC:2.4.99.17; EC:5	S-adenosylmethionine:tRNA ribosyltransferase-isomerase; Isomerases	IPR042119 (G3DSA:2.40.10.GENE3D); IPR042118 (G3DSA:3.40.1780.GENE3D); IPR003699 (PFAM); IPR003699 (TIGRFAM); IPR003699 (PANTHER); IPR003699 (HAMAP); IPR036100 (SUPERFAMILY)	F:GO:0016740; F:GO:0016853	F:transferase activity; F:isomerase activity
WP_003085042.1	MULTISPECIES: GatB/YqeY domain-containing protein [Pseudomonas]	35	6	15	6	16.8	283	6	0	Yes	1.10241	0.263209		-1.60697	0.00417543	Down	2.1247	0.000395794	Up	-1.26024	0.0475659		PA0578		conserved hypothetical protein	PA0578	-2.1462	6.31e-06	S	F:GO:0016740; F:GO:0016884	F:transferase activity; F:carbon-nitrogen ligase activity, with glutamine as amido-N-donor	EC:2; EC:6.3.5	Transferases; Forming carbon-nitrogen bonds	IPR042184 (G3DSA:1.10.1510.GENE3D); IPR019004 (PFAM); IPR023168 (G3DSA:1.10.10.GENE3D); IPR019004 (PANTHER); IPR003789 (SUPERFAMILY)	F:GO:0016884	F:carbon-nitrogen ligase activity, with glutamine as amido-N-donor
WP_003085590.1	MULTISPECIES: bifunctional proline dehydrogenase/L-glutamate gamma-semialdehyde dehydrogenase PutA [Pseudomonas]	49	45	275	45	115.5	7368	45	0	Yes	1.08895	0.087736		1.15314	0.00195774		2.12414	7.47764e-06	Up	-1.10785	0.00853053		PA0782	putA	proline dehydrogenase PutA	putA	1.10552	0.655639	CE	P:GO:0006355; P:GO:0006561; P:GO:0010133; F:GO:0003677; F:GO:0003700; F:GO:0003842; F:GO:0004657; F:GO:0016620; C:GO:0009898	P:regulation of transcription, DNA-templated; P:proline biosynthetic process; P:proline catabolic process to glutamate; F:DNA binding; F:DNA-binding transcription factor activity; F:1-pyrroline-5-carboxylate dehydrogenase activity; F:proline dehydrogenase activity; F:oxidoreductase activity, acting on the aldehyde or oxo group of donors, NAD or NADP as acceptor; C:cytoplasmic side of plasma membr…	EC:1.2.1.88; EC:1.5.99.8; EC:1.5.1	L-glutamate gamma-semialdehyde dehydrogenase; Acting on the CH-NH group of donors; Acting on the CH-NH group of donors	Coil (COILS); G3DSA:3.20.20.220 (GENE3D); IPR002872 (PFAM); IPR025703 (PIRSF); IPR016162 (G3DSA:3.40.605.GENE3D); IPR015590 (PFAM); G3DSA:1.20.5.460 (GENE3D); IPR005933 (TIGRFAM); IPR016163 (G3DSA:3.40.309.GENE3D); IPR024082 (PFAM); PTHR42862 (PANTHER); IPR016160 (PROSITE_PATTERNS); cd07125 (CDD); IPR024089 (SUPERFAMILY); IPR016161 (SUPERFAMILY); IPR029041 (SUPERFAMILY)	P:GO:0006355; P:GO:0006561; P:GO:0010133; F:GO:0003700; F:GO:0003842; F:GO:0004657; F:GO:0016491; F:GO:0016620	P:regulation of transcription, DNA-templated; P:proline biosynthetic process; P:proline catabolic process to glutamate; F:DNA-binding transcription factor activity; F:1-pyrroline-5-carboxylate dehydrogenase activity; F:proline dehydrogenase activity; F:oxidoreductase activity; F:oxidoreductase activity, acting on the aldehyde or oxo group of donors, NAD or NADP as acceptor
WP_003085059.1	MULTISPECIES: tRNA (adenosine(37)-N6)-threonylcarbamoyltransferase complex transferase subunit TsaD [Pseudomonas]	31	7	12	7	36.5	458	7	0	Yes	1.18212	0.071542		1.28879	0.109131		2.11909	0.000397417	Up	-1.06697	0.442733		PA0580	gcp	O-sialoglycoprotein endopeptidase	gcp	-1.61523	2.84e-05	O	P:GO:0002949; P:GO:0006508; P:GO:0090305; F:GO:0000287; F:GO:0003677; F:GO:0004222; F:GO:0004519; F:GO:0005506; F:GO:0042802; F:GO:0061711; F:GO:0140032; C:GO:0000408; C:GO:0005829	P:tRNA threonylcarbamoyladenosine modification; P:proteolysis; P:nucleic acid phosphodiester bond hydrolysis; F:magnesium ion binding; F:DNA binding; F:metalloendopeptidase activity; F:endonuclease activity; F:iron ion binding; F:identical protein binding; F:N(6)-L-threonylcarbamoyladenine synthase activity; F:glycosylation-dependent protein binding; C:EKC/KEOPS complex; C:cytosol	EC:3.4.24; EC:3.1; EC:2.3.1.234	Acting on peptide bonds (peptidases); Acting on ester bonds; N(6)-L-threonylcarbamoyladenine synthase	IPR017861 (PRINTS); G3DSA:3.30.420.40 (GENE3D); G3DSA:3.30.420.40 (GENE3D); IPR022450 (TIGRFAM); IPR017861 (TIGRFAM); IPR000905 (PFAM); IPR000905 (PANTHER); IPR022450 (PTHR11735:PANTHER); IPR022450 (HAMAP); IPR043129 (SUPERFAMILY); IPR043129 (SUPERFAMILY)	P:GO:0002949	P:tRNA threonylcarbamoyladenosine modification
WP_003093747.1	MULTISPECIES: 50S ribosomal protein L7/L12 [Pseudomonas]	28	4	39	4	12.5	1006	4	0	Yes	-1.04189	0.48616		-1.21582	0.00797834		2.11346	7.64438e-06	Up	1.06187	0.243462		PA4271	rplL	50S ribosomal protein L7 / L12	rplL	2.74577	0.00809837	J	P:GO:0006412; F:GO:0003735	P:translation; F:structural constituent of ribosome			Coil (COILS); IPR008932 (PFAM); IPR014719 (G3DSA:3.30.1390.GENE3D); IPR013823 (PFAM); IPR000206 (TIGRFAM); IPR036235 (G3DSA:1.20.5.GENE3D); IPR000206 (PANTHER); PTHR45987:SF16 (PANTHER); IPR000206 (HAMAP); IPR000206 (CDD); IPR014719 (SUPERFAMILY); IPR036235 (SUPERFAMILY)	P:GO:0006412; F:GO:0003735; C:GO:0005840	P:translation; F:structural constituent of ribosome; C:ribosome
WP_003089853.1	MULTISPECIES: ankyrin repeat domain-containing protein [Pseudomonas]	17	6	11	6	45.9	374	6	0	Yes	1.12702	0.0179609		1.17274	0.0225879		2.11279	1.56601e-06	Up				PA2503		hypothetical protein	PA2503	1.02844	0.751291						IPR036770 (G3DSA:1.25.40.GENE3D); SSF140860 (SUPERFAMILY)	no GO terms	no GO terms
WP_003092078.1	MULTISPECIES: bacterioferritin [Pseudomonas]	14	2	6	2	18.5	127	2	0	Yes	1.16316	0.208929		1.4801	0.000840148		2.11256	0.00799735	Up	-1.85674	0.0119465	Lower	PA3531	bfrB	bacterioferritin	bfrB	-1.05555	0.562595	P	P:GO:0006826; P:GO:0006880; F:GO:0004322; F:GO:0008199	P:iron ion transport; P:intracellular sequestering of iron ion; F:ferroxidase activity; F:ferric iron binding	EC:1.16.3.1	Ferroxidase	IPR002024 (PRINTS); IPR008331 (PFAM); IPR002024 (TIGRFAM); IPR002024 (PIRSF); IPR012347 (G3DSA:1.20.1260.GENE3D); PTHR30295 (PANTHER); PTHR30295:SF9 (PANTHER); IPR002024 (PROSITE_PATTERNS); IPR009040 (PROSITE_PROFILES); IPR002024 (CDD); IPR009078 (SUPERFAMILY)	P:GO:0006826; P:GO:0006879; F:GO:0008199	P:iron ion transport; P:cellular iron ion homeostasis; F:ferric iron binding
WP_003091187.1	MULTISPECIES: amino acid permease [Pseudomonas]	4	2	4	2	51	71	2	0	Yes	0.997478	0.89843		1.33922	0.0217184		2.10542	0.00145887	Up	-1.27062	0.0411302		PA3000	aroP1	aromatic amino acid transport protein AroP1	aroP1	-1.01595	0.847428	E	P:GO:0006865; P:GO:0055085; F:GO:0022857; C:GO:0016021	P:amino acid transport; P:transmembrane transport; F:transmembrane transporter activity; C:integral component of membrane	EC:7	Translocases	PIRSF006060 (PIRSF); G3DSA:1.20.1740.10 (GENE3D); IPR004841 (PFAM); PTHR43495 (PANTHER); PTHR43495:SF4 (PANTHER); IPR004840 (PROSITE_PATTERNS)	P:GO:0006865; P:GO:0055085; C:GO:0016020; C:GO:0016021	P:amino acid transport; P:transmembrane transport; C:membrane; C:integral component of membrane
WP_003096098.1	MULTISPECIES: A/G-specific adenine glycosylase [Pseudomonas]	17	6	11	6	39.3	220	6	0	Yes	-1.04292	0.47802		1.51636	6.83483e-05	Up	2.10341	2.60321e-06	Up	-1.25396	0.310351		PA5147	mutY	A / G specific adenine glycosylase	mutY	1.32186	0.0716651	L	P:GO:0006284; F:GO:0003677; F:GO:0019104; F:GO:0046872; F:GO:0051539	P:base-excision repair; F:DNA binding; F:DNA N-glycosylase activity; F:metal ion binding; F:4 iron, 4 sulfur cluster binding	EC:3.2.2	Glycosylases	G3DSA:1.10.340.30 (GENE3D); IPR000445 (PFAM); IPR003265 (PFAM); IPR023170 (G3DSA:1.10.1670.GENE3D); G3DSA:3.90.79.10 (GENE3D); IPR029119 (PFAM); IPR005760 (TIGRFAM); IPR044298 (PANTHER); IPR004036 (PROSITE_PATTERNS); IPR003265 (CDD); IPR029119 (CDD); IPR015797 (SUPERFAMILY); IPR011257 (SUPERFAMILY)	P:GO:0006281; P:GO:0006284; F:GO:0003677; F:GO:0003824; F:GO:0016798; F:GO:0019104	P:DNA repair; P:base-excision repair; F:DNA binding; F:catalytic activity; F:hydrolase activity, acting on glycosyl bonds; F:DNA N-glycosylase activity
WP_003093308.1	MULTISPECIES: transcription antitermination factor NusB [Pseudomonas]	31	5	13	5	17.7	167	5	0	Yes	1.05276	0.040055		-1.5333	2.68696e-05	Down	2.09009	5.60553e-06	Up	-1.30151	2.75207e-05		PA4052	nusB	NusB protein	nusB	-1.19855	0.0880963	K	P:GO:0006355; P:GO:0031564; F:GO:0003723; C:GO:0005829	P:regulation of transcription, DNA-templated; P:transcription antitermination; F:RNA binding; C:cytosol			IPR006027 (PFAM); IPR011605 (TIGRFAM); IPR035926 (G3DSA:1.10.940.GENE3D); mobidb-lite (MOBIDB_LITE); IPR011605 (PANTHER); IPR011605 (HAMAP); cd00619 (CDD); IPR035926 (SUPERFAMILY)	P:GO:0006353; P:GO:0006355; F:GO:0003723	P:DNA-templated transcription, termination; P:regulation of transcription, DNA-templated; F:RNA binding
WP_003091449.1	MULTISPECIES: S-methyl-5-thioribose-1-phosphate isomerase [Pseudomonas]	22	6	19	6	39.4	453	6	0	Yes	1.18293	0.0188498		-1.33157	0.00199058		2.0814	2.70031e-05	Up	-1.0329	0.526012		PA3169		5-methylthioribose-1-phosphate isomerase MtnA	PA3169	-1.12613	0.193169	E	P:GO:0019284; P:GO:0019509; F:GO:0046523	P:L-methionine salvage from S-adenosylmethionine; P:L-methionine salvage from methylthioadenosine; F:S-methyl-5-thioribose-1-phosphate isomerase activity	EC:5.3.1.23	S-methyl-5-thioribose-1-phosphate isomerase	IPR042529 (G3DSA:3.40.50.GENE3D); IPR027363 (G3DSA:1.20.120.GENE3D); IPR011559 (TIGRFAM); IPR000649 (PFAM); IPR005251 (TIGRFAM); PTHR43475 (PANTHER); PTHR43475:SF1 (PANTHER); IPR005251 (HAMAP); IPR037171 (SUPERFAMILY)	P:GO:0044237; P:GO:0044249	P:cellular metabolic process; P:cellular biosynthetic process
WP_003115052.1	MULTISPECIES: type VI secretion system baseplate subunit TssK [Pseudomonas]	46	18	58	18	48.2	1659	18	0	Yes	1.02054	0.546271		1.09251	0.0517074		2.08071	9.63132e-07	Up	2.48214	7.49017e-06	Higher	PA0079	tssK1	TssK1	PA0079	2.16053	0.000360875	S					IPR010263 (TIGRFAM); IPR010263 (PFAM); IPR010263 (PANTHER); PTHR35566:SF1 (PANTHER)	no GO terms	no GO terms
WP_003089808.1	MULTISPECIES: TetR/AcrR family transcriptional regulator [Pseudomonas]	12	2	3	2	21.9	75	2	0	Yes	1.06009	0.331671		1.18757	0.0404402		2.08024	6.75713e-05	Up	1.47641	0.00212487		PA2484		conserved hypothetical protein	PA2484	1.28708	0.120281	K	F:GO:0003677	F:DNA binding			G3DSA:1.10.357.10 (GENE3D); IPR001647 (PFAM); G3DSA:1.10.10.60 (GENE3D); PTHR47506 (PANTHER); PTHR47506:SF1 (PANTHER); IPR009057 (SUPERFAMILY); IPR036271 (SUPERFAMILY)	F:GO:0003677	F:DNA binding
WP_003096567.1	MULTISPECIES: dUTP diphosphatase [Pseudomonas]	22	2	7	2	16	284	2	0	Yes	-1.01154	0.786563		-1.00718	0.865051		2.0753	7.95044e-06	Up				PA5321	dut	deoxyuridine 5'-triphosphate nucleotidohydrolase	dut	-1.13572	0.0973356	F	P:GO:0006226; P:GO:0046081; F:GO:0000287; F:GO:0004170; C:GO:0005829	P:dUMP biosynthetic process; P:dUTP catabolic process; F:magnesium ion binding; F:dUTP diphosphatase activity; C:cytosol	EC:3.6.1.23; EC:3.6.1.9	dUTP diphosphatase; Nucleotide diphosphatase	IPR008181 (TIGRFAM); IPR029054 (PFAM); IPR036157 (G3DSA:2.70.40.GENE3D); IPR008181 (PANTHER); PTHR11241:SF0 (PANTHER); IPR008181 (HAMAP); IPR033704 (CDD); IPR036157 (SUPERFAMILY)	P:GO:0006226; P:GO:0046081; F:GO:0000287; F:GO:0004170	P:dUMP biosynthetic process; P:dUTP catabolic process; F:magnesium ion binding; F:dUTP diphosphatase activity
WP_003094111.1	MULTISPECIES: UDP-3-O-acyl-N-acetylglucosamine deacetylase [Pseudomonas]	40	10	58	10	33.4	1606	10	0	Yes	1.0553	0.132744		1.1439	0.00611069		2.07095	5.87712e-06	Up	-1.0493	0.196508		PA4406	lpxC	UDP-3-O-acyl-N-acetylglucosamine deacetylase	lpxC	1.18275	0.0523159	M	P:GO:0009245; F:GO:0008759; F:GO:0046872; F:GO:0103117	P:lipid A biosynthetic process; F:UDP-3-O-[3-hydroxymyristoyl] N-acetylglucosamine deacetylase activity; F:metal ion binding; F:UDP-3-O-acyl-N-acetylglucosamine deacetylase activity	EC:3.5.1.108	UDP-3-O-acyl-N-acetylglucosamine deacetylase	IPR004463 (PFAM); IPR004463 (TIGRFAM); IPR011334 (G3DSA:3.30.1700.GENE3D); IPR015870 (G3DSA:3.30.230.GENE3D); IPR004463 (PANTHER); IPR004463 (HAMAP); IPR020568 (SUPERFAMILY); IPR020568 (SUPERFAMILY)	P:GO:0009245; F:GO:0008759	P:lipid A biosynthetic process; F:UDP-3-O-[3-hydroxymyristoyl] N-acetylglucosamine deacetylase activity
WP_003083639.1	MULTISPECIES: serine/threonine-protein phosphatase [Pseudomonas]	22	5	13	5	25.9	383	5	0	Yes	1.07347	0.167183		1.31197	0.0020269		2.07063	1.14239e-05	Up	2.01715	0.0171955	Higher	PA0075	pppA	PppA	pppA	2.61524	1.46e-07	T	P:GO:0006470; P:GO:0050709; F:GO:0004722	P:protein dephosphorylation; P:negative regulation of protein secretion; F:protein serine/threonine phosphatase activity	EC:3.1.3.16	Protein-serine/threonine phosphatase	PF13672 (PFAM); IPR036457 (G3DSA:3.60.40.GENE3D); PTHR13832:SF321 (PANTHER); IPR015655 (PANTHER); IPR001932 (PROSITE_PROFILES); IPR001932 (CDD); IPR036457 (SUPERFAMILY)	P:GO:0006470; F:GO:0004722; F:GO:0016791	P:protein dephosphorylation; F:protein serine/threonine phosphatase activity; F:phosphatase activity
WP_023656933.1	MULTISPECIES: proline hydroxylase [Pseudomonas]	9	2	3	2	26.2	137	2	0	Yes	1.07284	0.791338		1.27511	0.408391		2.07025	0.0210485	Up	-1.03065	0.871569		PA0310		hypothetical protein	PA0310	-1.21185	0.0537822	O	F:GO:0005506; F:GO:0016705; F:GO:0031418	F:iron ion binding; F:oxidoreductase activity, acting on paired donors, with incorporation or reduction of molecular oxygen; F:L-ascorbic acid binding	EC:1.14	Acting on paired donors, with incorporation or reduction of molecular oxygen. The oxygen incorporated need not be derived from O(2)	G3DSA:2.60.120.620 (GENE3D); IPR044862 (PFAM); PTHR12907 (PANTHER); PTHR12907:SF26 (PANTHER); IPR005123 (PROSITE_PROFILES)	no GO terms	no GO terms
WP_003097066.1	MULTISPECIES: Tim44 domain-containing protein [Pseudomonas]	45	7	44	7	30.4	1722	7	0	Yes	1.06906	0.197765		1.04658	0.342814		2.06906	0.00017265	Up				PA5528		hypothetical protein	PA5528	1.13417	0.380577	S	C:GO:0016021	C:integral component of membrane			IPR007379 (PFAM); mobidb-lite (MOBIDB_LITE); mobidb-lite (MOBIDB_LITE); PTHR41542 (PANTHER); IPR032710 (SUPERFAMILY)	no GO terms	no GO terms
WP_014603460.1	MULTISPECIES: protein kinase [Pseudomonas]	35	26	63	26	110	1648	26	0	Yes	1.14545	0.000137751		-1.1278	0.00333877		2.06832	3.01981e-06	Up	2.42	7.06833e-05	Higher	PA0074	ppkA	serine/threonine protein kinase PpkA	ppkA	2.40361	9.3e-07	KLT	P:GO:0006468; F:GO:0004674; F:GO:0005524	P:protein phosphorylation; F:protein serine/threonine kinase activity; F:ATP binding	EC:2.7.1	Transferring phosphorus-containing groups	G3DSA:1.10.510.10 (GENE3D); G3DSA:3.30.200.20 (GENE3D); IPR000719 (PFAM); IPR002035 (PFAM); IPR036465 (G3DSA:3.40.50.GENE3D); mobidb-lite (MOBIDB_LITE); mobidb-lite (MOBIDB_LITE); mobidb-lite (MOBIDB_LITE); mobidb-lite (MOBIDB_LITE); mobidb-lite (MOBIDB_LITE); PTHR43289:SF18 (PANTHER); PTHR43289 (PANTHER); IPR008271 (PROSITE_PATTERNS); IPR017441 (PROSITE_PATTERNS); IPR002035 (PROSITE_PROFILES); I…	P:GO:0006468; F:GO:0004672; F:GO:0005524	P:protein phosphorylation; F:protein kinase activity; F:ATP binding
WP_003109337.1	MULTISPECIES: 1-deoxy-D-xylulose-5-phosphate reductoisomerase [Pseudomonas]	28	7	10	7	42.5	467	7	0	Yes	1.10689	0.375668		-1.13788	0.340641		2.06531	0.00153535	Up	2.22096	0.000750034	Higher	PA3650	dxr	1-deoxy-d-xylulose 5-phosphate reductoisomerase	dxr	1.0656	0.731297	I	P:GO:0051484; F:GO:0000287; F:GO:0005515; F:GO:0016853; F:GO:0030145; F:GO:0030604; F:GO:0050897; F:GO:0070402	P:isopentenyl diphosphate biosynthetic process, methylerythritol 4-phosphate pathway involved in terpenoid biosynthetic process; F:magnesium ion binding; F:protein binding; F:isomerase activity; F:manganese ion binding; F:1-deoxy-D-xylulose-5-phosphate reductoisomerase activity; F:cobalt ion binding; F:NADPH binding	EC:1.1.1.267; EC:5	1-deoxy-D-xylulose-5-phosphate reductoisomerase; Isomerases	G3DSA:1.10.1740.10 (GENE3D); IPR013644 (PFAM); IPR026877 (PFAM); IPR003821 (PIRSF); IPR003821 (TIGRFAM); G3DSA:3.40.50.720 (GENE3D); IPR013512 (PFAM); IPR003821 (PANTHER); IPR003821 (HAMAP); SSF55347 (SUPERFAMILY); IPR036291 (SUPERFAMILY); IPR036169 (SUPERFAMILY)	P:GO:0008299; F:GO:0005515; F:GO:0030604; F:GO:0046872; F:GO:0070402	P:isoprenoid biosynthetic process; F:protein binding; F:1-deoxy-D-xylulose-5-phosphate reductoisomerase activity; F:metal ion binding; F:NADPH binding
WP_003093131.1	MULTISPECIES: hypothetical protein [Pseudomonas]	16	5	7	5	40.5	111	5	0	Yes	1.53444	0.315781		3.47763	0.145087		2.05681	0.226413		-1.3459	0.405257		PA3969		conserved hypothetical protein	PA3969	1.21987	0.371673	S	F:GO:0008270; F:GO:0070290	F:zinc ion binding; F:N-acylphosphatidylethanolamine-specific phospholipase D activity	EC:3.1.4.4; EC:3.1.1	Phospholipase D; Acting on ester bonds	IPR036866 (G3DSA:3.60.15.GENE3D); IPR001279 (PFAM); mobidb-lite (MOBIDB_LITE); PTHR15032 (PANTHER); PS51257 (PROSITE_PROFILES); IPR036866 (SUPERFAMILY)	no GO terms	no GO terms
WP_003088624.1	MULTISPECIES: multidrug efflux RND transporter periplasmic adaptor subunit MexX [Pseudomonas]	54	17	63	17	42	2379	17	0	Yes	-1.13686	0.00630016		1.12008	0.145006		2.04233	9.83369e-07	Up	5.75302	0.000372941	Higher	PA2019	mexX	Resistance-Nodulation-Cell Division (RND) multidrug efflux membrane fusion protein MexX precursor	PA2019	-1.17783	0.0258546	M	P:GO:0051301; P:GO:0055085; F:GO:0022857; C:GO:0016020	P:cell division; P:transmembrane transport; F:transmembrane transporter activity; C:membrane	EC:7	Translocases	Coil (COILS); G3DSA:2.40.420.20 (GENE3D); G3DSA:1.10.287.470 (GENE3D); G3DSA:2.40.50.100 (GENE3D); IPR006143 (TIGRFAM); IPR032317 (PFAM); IPR043602 (PFAM); G3DSA:2.40.30.170 (GENE3D); mobidb-lite (MOBIDB_LITE); PTHR30158 (PANTHER); PTHR30158:SF3 (PANTHER); SSF111369 (SUPERFAMILY)	P:GO:0055085; F:GO:0022857; C:GO:0016020	P:transmembrane transport; F:transmembrane transporter activity; C:membrane
WP_003120921.1	MULTISPECIES: ribosome-associated protein [Pseudomonas]	26	5	21	5	23.1	319	5	0	Yes	0.998858	0.971359		-1.19103	0.0569828		2.04224	0.000114044	Up	-1.3399	0.0128044		PA4473		hypothetical protein	PA4473	1.22918	0.128946	S	C:GO:0005829	C:cytosol			IPR023153 (G3DSA:1.10.60.GENE3D); IPR023153 (G3DSA:1.10.60.GENE3D); IPR006839 (PFAM); IPR006839 (PIRSF); IPR006839 (PANTHER); IPR006839 (HAMAP); IPR006839 (CDD); IPR023153 (SUPERFAMILY)	no GO terms	no GO terms
WP_003100607.1	MULTISPECIES: tRNA guanosine(34) transglycosylase Tgt [Pseudomonas]	29	8	22	8	41.2	488	8	0	Yes	1.00656	0.844058		1.14698	0.0155533		2.03871	3.55909e-06	Up	-1.25919	0.00145315		PA3823	tgt	queuine tRNA-ribosyltransferase	tgt	-1.34192	0.0244093	J	P:GO:0002099; P:GO:0008616; P:GO:0101030; F:GO:0008270; F:GO:0008479; C:GO:0005829	P:tRNA wobble guanine modification; P:queuosine biosynthetic process; P:tRNA-guanine transglycosylation; F:zinc ion binding; F:queuine tRNA-ribosyltransferase activity; C:cytosol	EC:2.4.2.29	tRNA-guanosine(34) preQ(1) transglycosylase	IPR004803 (TIGRFAM); IPR036511 (G3DSA:3.20.20.GENE3D); IPR002616 (PFAM); IPR002616 (TIGRFAM); PTHR46499 (PANTHER); IPR004803 (HAMAP); IPR036511 (SUPERFAMILY)	P:GO:0006400; P:GO:0101030; F:GO:0008479; F:GO:0016763	P:tRNA modification; P:tRNA-guanine transglycosylation; F:queuine tRNA-ribosyltransferase activity; F:pentosyltransferase activity
WP_003085934.1	MULTISPECIES: ABC transporter permease [Pseudomonas]	13	3	9	3	25.1	136	3	0	Yes	1.0901	0.583059		1.24079	0.149195		2.03735	0.00404594	Up	1.00183	0.983265		PA0889	aotQ	arginine/ornithine transport protein AotQ	aotQ	-1.33251	0.0203295	P	P:GO:0097638; P:GO:0097640; F:GO:0022857	P:L-arginine import across plasma membrane; P:L-ornithine import across plasma membrane; F:transmembrane transporter activity	EC:7	Translocases	IPR010065 (TIGRFAM); IPR000515 (PFAM); IPR035906 (G3DSA:1.10.3720.GENE3D); PTHR30133:SF4 (PANTHER); PTHR30133 (PANTHER); IPR000515 (PROSITE_PROFILES); IPR000515 (CDD); IPR035906 (SUPERFAMILY)	P:GO:0055085; P:GO:0071705; F:GO:0022857; C:GO:0016020; C:GO:0016021; C:GO:0043190	P:transmembrane transport; P:nitrogen compound transport; F:transmembrane transporter activity; C:membrane; C:integral component of membrane; C:ATP-binding cassette (ABC) transporter complex
WP_003092822.1	MULTISPECIES: Fe-S protein assembly chaperone HscA [Pseudomonas]	46	24	66	24	66.4	1710	24	0	Yes	1.07847	0.165728		1.33813	0.000773832		2.03657	3.0318e-06	Up	-2.01233	1.11184e-05	Lower	PA3810	hscA	heat shock protein HscA	hscA	-1.01036	0.962891	O	P:GO:0009408; P:GO:0016226; P:GO:0034620; P:GO:0051085; P:GO:0065003; P:GO:0070417; P:GO:0097428; P:GO:1903506; F:GO:0005524; F:GO:0008270; F:GO:0016887; F:GO:0016989; F:GO:0043531; F:GO:0044183; F:GO:0051082; F:GO:0051087; C:GO:1990230	P:response to heat; P:iron-sulfur cluster assembly; P:cellular response to unfolded protein; P:chaperone cofactor-dependent protein refolding; P:protein-containing complex assembly; P:cellular response to cold; P:protein maturation by iron-sulfur cluster transfer; P:regulation of nucleic acid-templated transcription; F:ATP binding; F:zinc ion binding; F:ATP hydrolysis activity; F:sigma factor ant…	EC:3.6.1	Acting on acid anhydrides	Coil (COILS); PR00301 (PRINTS); IPR029048 (G3DSA:1.20.1270.GENE3D); IPR010236 (TIGRFAM); IPR013126 (PFAM); G3DSA:3.30.420.40 (GENE3D); IPR029047 (G3DSA:2.60.34.GENE3D); G3DSA:3.90.640.10 (GENE3D); G3DSA:3.30.420.40 (GENE3D); PTHR19375:SF176 (PANTHER); IPR013126 (PANTHER); IPR018181 (PROSITE_PATTERNS); IPR018181 (PROSITE_PATTERNS); IPR018181 (PROSITE_PATTERNS); IPR010236 (HAMAP); IPR042039 (CDD); …	P:GO:0006457; P:GO:0016226; F:GO:0005524; F:GO:0016887; F:GO:0051082	P:protein folding; P:iron-sulfur cluster assembly; F:ATP binding; F:ATP hydrolysis activity; F:unfolded protein binding
WP_003095367.1	MULTISPECIES: translation initiation factor Sui1 [Pseudomonas]	33	3	8	3	12.6	205	3	0	Yes	1.20473	0.0325134		-1.13364	0.0943327		2.02088	0.000387165	Up				PA4840		conserved hypothetical protein	PA4840	-1.17306	0.0671304	J	P:GO:0006413; F:GO:0003743; F:GO:0043024	P:translational initiation; F:translation initiation factor activity; F:ribosomal small subunit binding			IPR001950 (PFAM); IPR005872 (PIRSF); IPR005872 (TIGRFAM); G3DSA:3.30.780.10 (GENE3D); IPR001950 (PROSITE_PROFILES); IPR005872 (CDD); IPR036877 (SUPERFAMILY)	P:GO:0006413; F:GO:0003743	P:translational initiation; F:translation initiation factor activity
WP_073660234.1	MULTISPECIES: RDD family protein [Pseudomonas]	9	2	4	2	28.8	96	2	0	Yes	-1.19003	0.129308		-1.48554	0.0598214		2.01947	0.000504684	Up				PA4318		hypothetical protein	PA4318	1.10943	0.321793	S	C:GO:0016021	C:integral component of membrane			IPR010432 (PFAM); PTHR38480 (PANTHER)	no GO terms	no GO terms
WP_003083913.1	MULTISPECIES: DUF1987 domain-containing protein [Pseudomonas]	25	2	4	2	14.5	233	2	0	Yes	1.06065	0.698613		1.69879	0.0806091		2.01348	0.0411872	Up	1.40066	0.364975		PA0170		hypothetical protein	PA0170	1.18727	0.354555	S					IPR018530 (PFAM)	no GO terms	no GO terms
WP_003084714.1	MULTISPECIES: ATP-dependent zinc protease [Pseudomonas]	19	3	4	3	19.4	89	3	0	Yes	1.67464	0.00115067	Up	-1.76478	0.000951111	Down	2.00684	9.34592e-06	Up	1.08491	0.461013		PA0457		hypothetical protein	PA0457	-1.08101	0.179155	M	P:GO:0006508; F:GO:0008233	P:proteolysis; F:peptidase activity	EC:3.4	Acting on peptide bonds (peptidases)	IPR008503 (PFAM); IPR021109 (G3DSA:2.40.70.GENE3D); PTHR38037 (PANTHER); PTHR38037:SF2 (PANTHER); PS51257 (PROSITE_PROFILES); IPR021109 (SUPERFAMILY)	no GO terms	no GO terms
WP_003084954.1	MULTISPECIES: hypothetical protein [Pseudomonas]	15	4	5	4	41	134	4	0	Yes	1.33362	0.00645989		1.62495	0.000375199	Up	2.00654	0.00129326	Up				PA0549		hypothetical protein	PA0549	1.07731	0.61905						no IPS match	no IPS match	no IPS match
WP_003158906.1	MULTISPECIES: ATP-binding protein [Proteobacteria]	20	7	13	7	38.2	271	7	0	Yes	-1.04163	0.505739		-1.06115	0.457511		2.00299	3.98393e-05	Up										O	P:GO:0006508; F:GO:0005524; F:GO:0008237; F:GO:0016887	P:proteolysis; F:ATP binding; F:metallopeptidase activity; F:ATP hydrolysis activity	EC:3.6.1; EC:3.4	Acting on acid anhydrides; Acting on peptide bonds (peptidases)	IPR027417 (G3DSA:3.40.50.GENE3D); IPR003959 (PFAM); PTHR23073 (PANTHER); PTHR23073:SF82 (PANTHER); cd00009 (CDD); IPR027417 (SUPERFAMILY)	F:GO:0005524; F:GO:0016887	F:ATP binding; F:ATP hydrolysis activity
WP_003094846.1	MULTISPECIES: serine hydroxymethyltransferase [Pseudomonas]	45	16	77	12	45.1	1775	16	3	Yes	1.09339	0.145576		1.4964	0.000500151	Up	2.00188	0.000252165	Up	-1.16233	0.0327793		PA4602	glyA3	serine hydroxymethyltransferase	glyA3	-1.18694	0.0984088	E	P:GO:0019264; P:GO:0032259; P:GO:0035999; F:GO:0004372; F:GO:0008168; F:GO:0030170; C:GO:0005737	P:glycine biosynthetic process from serine; P:methylation; P:tetrahydrofolate interconversion; F:glycine hydroxymethyltransferase activity; F:methyltransferase activity; F:pyridoxal phosphate binding; C:cytoplasm	EC:2.1.2.1; EC:2.1.1	Glycine hydroxymethyltransferase; Transferring one-carbon groups	Coil (COILS); IPR039429 (PFAM); IPR015421 (G3DSA:3.40.640.GENE3D); IPR001085 (PIRSF); IPR015422 (G3DSA:3.90.1150.GENE3D); PTHR11680:SF50 (PANTHER); IPR001085 (PANTHER); IPR019798 (PROSITE_PATTERNS); IPR001085 (HAMAP); IPR001085 (CDD); IPR015424 (SUPERFAMILY)	P:GO:0019264; P:GO:0035999; F:GO:0003824; F:GO:0004372; F:GO:0030170	P:glycine biosynthetic process from serine; P:tetrahydrofolate interconversion; F:catalytic activity; F:glycine hydroxymethyltransferase activity; F:pyridoxal phosphate binding
WP_003095295.1	MULTISPECIES: class I SAM-dependent methyltransferase [Pseudomonas]	10	2	3	2	29.3	69	2	0	Yes	1.36366	0.287712		1.00215	0.957313		1.99946	0.000125343	Up	1.29151	0.0398107		PA4800		hypothetical protein	PA4800	-1.03401	0.74131	Q	P:GO:0032259; F:GO:0008168	P:methylation; F:methyltransferase activity	EC:2.1.1	Transferring one-carbon groups	G3DSA:3.40.50.150 (GENE3D); IPR013216 (PFAM); PTHR43464:SF45 (PANTHER); PTHR43464 (PANTHER); cd02440 (CDD); IPR029063 (SUPERFAMILY)	F:GO:0008168	F:methyltransferase activity
WP_003094922.1	MULTISPECIES: amino acid permease [Pseudomonas]	8	4	9	4	53	294	4	0	Yes	1.00978	0.933035		1.21636	0.0740308		1.99576	0.000139522	Up	-1.22287	0.0346109		PA4628	lysP	lysine-specific permease	lysP	-1.3393	0.00485397	E	P:GO:0003333; P:GO:0046942; P:GO:0051260; P:GO:0098656; F:GO:0008514; F:GO:0015171; F:GO:0015318; F:GO:0042802; F:GO:0046982; C:GO:0005887	P:amino acid transmembrane transport; P:carboxylic acid transport; P:protein homooligomerization; P:anion transmembrane transport; F:organic anion transmembrane transporter activity; F:amino acid transmembrane transporter activity; F:inorganic molecular entity transmembrane transporter activity; F:identical protein binding; F:protein heterodimerization activity; C:integral component of plasma mem…	EC:7	Translocases	IPR004841 (PFAM); PIRSF006060 (PIRSF); G3DSA:1.20.1740.10 (GENE3D); PTHR43341 (PANTHER); PTHR43341:SF1 (PANTHER); IPR004840 (PROSITE_PATTERNS)	P:GO:0006865; P:GO:0055085; C:GO:0016020; C:GO:0016021	P:amino acid transport; P:transmembrane transport; C:membrane; C:integral component of membrane
WP_003096508.1	MULTISPECIES: xanthine phosphoribosyltransferase [Pseudomonas]	30	6	18	6	20.6	404	6	0	Yes	1.05587	0.391795		-1.23571	0.0167608		1.99573	0.000182694	Up	-1.19146	0.0311739		PA5298		xanthine phosphoribosyltransferase	PA5298	-1.43639	0.00655121	F	P:GO:0006166; P:GO:0032265; P:GO:0046110; F:GO:0000310; C:GO:0005737	P:purine ribonucleoside salvage; P:XMP salvage; P:xanthine metabolic process; F:xanthine phosphoribosyltransferase activity; C:cytoplasm	EC:2.4.2.22	Xanthine phosphoribosyltransferase	IPR010079 (TIGRFAM); IPR029057 (G3DSA:3.40.50.GENE3D); IPR000836 (PFAM); PTHR43864 (PANTHER); PTHR43864:SF1 (PANTHER); IPR010079 (HAMAP); IPR000836 (CDD); IPR029057 (SUPERFAMILY)	P:GO:0043101; P:GO:0046110; F:GO:0016763	P:purine-containing compound salvage; P:xanthine metabolic process; F:pentosyltransferase activity
WP_003085224.1	MULTISPECIES: 2-nonaprenyl-3-methyl-6-methoxy-1,4-benzoquinol hydroxylase [Pseudomonas]	21	3	7	3	23.6	188	3	0	Yes	0.998102	0.980656		-1.45408	0.00510473		1.99566	0.000193803	Up	2.32159	0.000182676	Higher	PA0655		hypothetical protein	PA0655	-1.08959	0.448934	H	P:GO:0006744; F:GO:0004497; F:GO:0046872; C:GO:0005886; C:GO:0016021	P:ubiquinone biosynthetic process; F:monooxygenase activity; F:metal ion binding; C:plasma membrane; C:integral component of membrane	EC:1	Oxidoreductases	IPR012347 (G3DSA:1.20.1260.GENE3D); IPR011566 (PFAM); IPR011566 (PANTHER); IPR011566 (HAMAP); IPR011566 (CDD); IPR009078 (SUPERFAMILY)	P:GO:0006744; F:GO:0004497	P:ubiquinone biosynthetic process; F:monooxygenase activity
WP_003136264.1	MULTISPECIES: hypothetical protein [Proteobacteria]	42	8	18	8	22.4	658	8	0	Yes	1.09503	0.35356		-1.46441	0.0104786		1.99457	0.0023145	Up	-1.08227	0.354347		PA5330		hypothetical protein	PA5330	1.03202	0.745123	S					Coil (COILS); Coil (COILS)	no GO terms	no GO terms
WP_003122151.1	MULTISPECIES: DNA mismatch repair protein MutS [Pseudomonas]	29	20	51	20	94.9	1308	20	0	Yes	1.17698	0.0219045		1.04168	0.217442		1.99041	4.31115e-05	Up	1.33643	0.000805469		PA3620	mutS	DNA mismatch repair protein MutS	mutS	-3.29011	1.46e-10	L	P:GO:0000018; P:GO:0006298; F:GO:0003684; F:GO:0005524; F:GO:0008301; F:GO:0016887; F:GO:0032136; F:GO:0042802; F:GO:0043531; C:GO:0005829; C:GO:0032300	P:regulation of DNA recombination; P:mismatch repair; F:damaged DNA binding; F:ATP binding; F:DNA binding, bending; F:ATP hydrolysis activity; F:adenine/cytosine mispair binding; F:identical protein binding; F:ADP binding; C:cytosol; C:mismatch repair complex	EC:3.6.1	Acting on acid anhydrides	Coil (COILS); Coil (COILS); IPR007860 (PFAM); IPR005748 (TIGRFAM); IPR000432 (PFAM); IPR007861 (PFAM); G3DSA:1.10.1420.10 (GENE3D); IPR036678 (G3DSA:3.30.420.GENE3D); IPR016151 (G3DSA:3.40.1170.GENE3D); IPR007696 (PFAM); G3DSA:6.10.140.430 (GENE3D); IPR017261 (PIRSF); G3DSA:1.10.1420.10 (GENE3D); IPR007695 (PFAM); IPR027417 (G3DSA:3.40.50.GENE3D); mobidb-lite (MOBIDB_LITE); mobidb-lite (MOBIDB_LI…	P:GO:0006298; F:GO:0005524; F:GO:0030983	P:mismatch repair; F:ATP binding; F:mismatched DNA binding
WP_023657821.1	MULTISPECIES: multidrug efflux RND transporter periplasmic adaptor subunit MexC [Pseudomonas]	38	12	30	12	40.8	745	12	0	Yes	-1.06579	0.477281		-1.03396	0.729425		1.9754	0.00029186	Up				PA4599	mexC	Resistance-Nodulation-Cell Division (RND) multidrug efflux membrane fusion protein MexC precursor	mexC	-1.00136	0.993378	M	P:GO:0055085; F:GO:0022857; C:GO:0016020	P:transmembrane transport; F:transmembrane transporter activity; C:membrane	EC:7	Translocases	Coil (COILS); G3DSA:2.40.50.100 (GENE3D); G3DSA:1.10.287.470 (GENE3D); G3DSA:2.40.30.170 (GENE3D); G3DSA:2.40.420.20 (GENE3D); IPR032317 (PFAM); IPR006143 (TIGRFAM); PTHR30158 (PANTHER); PTHR30158:SF3 (PANTHER); PS51257 (PROSITE_PROFILES); SSF111369 (SUPERFAMILY)	P:GO:0055085; F:GO:0022857; C:GO:0016020	P:transmembrane transport; F:transmembrane transporter activity; C:membrane
WP_003095409.1	MULTISPECIES: phosphoribosylamine--glycine ligase [Pseudomonas]	51	17	71	17	45.2	2520	17	0	Yes	1.13718	0.00430843		1.12295	0.0543872		1.973	4.64162e-07	Up	1.06987	0.110964		PA4855	purD	phosphoribosylamine--glycine ligase	purD	1.34119	0.239183	F	P:GO:0006189; P:GO:0006974; P:GO:0009113; F:GO:0004637; F:GO:0005524; F:GO:0016887; F:GO:0046872	P:'de novo' IMP biosynthetic process; P:cellular response to DNA damage stimulus; P:purine nucleobase biosynthetic process; F:phosphoribosylamine-glycine ligase activity; F:ATP binding; F:ATP hydrolysis activity; F:metal ion binding	EC:3.6.1; EC:6.3.4.13	Acting on acid anhydrides; Phosphoribosylamine--glycine ligase	IPR013815 (G3DSA:3.30.1490.GENE3D); IPR000115 (TIGRFAM); G3DSA:3.30.470.20 (GENE3D); IPR020560 (PFAM); IPR020562 (PFAM); IPR020561 (PFAM); IPR037123 (G3DSA:3.90.600.GENE3D); G3DSA:3.40.50.20 (GENE3D); mobidb-lite (MOBIDB_LITE); IPR000115 (PANTHER); PTHR43472:SF1 (PANTHER); IPR020559 (PROSITE_PATTERNS); IPR011761 (PROSITE_PROFILES); IPR000115 (HAMAP); IPR011054 (SUPERFAMILY); SSF56059 (SUPERFAMILY…	P:GO:0009113; F:GO:0004637; F:GO:0005524; F:GO:0046872	P:purine nucleobase biosynthetic process; F:phosphoribosylamine-glycine ligase activity; F:ATP binding; F:metal ion binding
WP_003094098.1	MULTISPECIES: preprotein translocase subunit SecA [Pseudomonas]	37	26	119	26	103.8	3872	26	0	Yes	1.02016	0.422386		-1.18752	0.000456763		1.96223	1.56128e-05	Up	1.09963	0.00596848		PA4403	secA	secretion protein SecA	secA	1.00916	0.928725	U	P:GO:0006605; P:GO:0015833; P:GO:0017038; P:GO:0043952; P:GO:0061077; P:GO:0065002; F:GO:0005524; F:GO:0015440; F:GO:0015462; F:GO:0016887; F:GO:0042802; F:GO:0046872; C:GO:0005829; C:GO:0005887	P:protein targeting; P:peptide transport; P:protein import; P:protein transport by the Sec complex; P:chaperone-mediated protein folding; P:intracellular protein transmembrane transport; F:ATP binding; F:ABC-type peptide transporter activity; F:ABC-type protein transporter activity; F:ATP hydrolysis activity; F:identical protein binding; F:metal ion binding; C:cytosol; C:integral component of pla…	EC:3.6.1; EC:7.4.2.5	Acting on acid anhydrides; Bacterial ABC-type protein transporter	Coil (COILS); Coil (COILS); IPR000185 (PRINTS); IPR011130 (PFAM); G3DSA:3.90.1440.10 (GENE3D); IPR000185 (TIGRFAM); IPR027417 (G3DSA:3.40.50.GENE3D); IPR027417 (G3DSA:3.40.50.GENE3D); IPR011116 (PFAM); IPR004027 (PFAM); IPR011115 (PFAM); G3DSA:1.10.3060.10 (GENE3D); mobidb-lite (MOBIDB_LITE); IPR000185 (PANTHER); IPR020937 (PROSITE_PATTERNS); IPR014001 (PROSITE_PROFILES); IPR000185 (HAMAP); IPR00…	P:GO:0006605; P:GO:0006886; P:GO:0017038; F:GO:0005524; C:GO:0016020	P:protein targeting; P:intracellular protein transport; P:protein import; F:ATP binding; C:membrane
WP_003131987.1	MULTISPECIES: mercury resistance system periplasmic binding protein MerP [Bacteria]	33	3	5	2	9.5	149	3	1	Yes	1.31707	0.0698603		-1.29046	0.107075		1.95652	0.030295	Up										P	P:GO:0015694; P:GO:0032259; F:GO:0008168; F:GO:0015097; F:GO:0016787; F:GO:0045340; C:GO:0042597	P:mercury ion transport; P:methylation; F:methyltransferase activity; F:mercury ion transmembrane transporter activity; F:hydrolase activity; F:mercury ion binding; C:periplasmic space	EC:3; EC:7; EC:2.1.1	Hydrolases; Translocases; Transferring one-carbon groups	IPR001802 (PRINTS); G3DSA:3.30.70.100 (GENE3D); IPR006121 (PFAM); IPR011795 (TIGRFAM); IPR017969 (PROSITE_PATTERNS); IPR006121 (PROSITE_PROFILES); IPR006121 (CDD); IPR036163 (SUPERFAMILY)	P:GO:0015694; P:GO:0046689; F:GO:0015097; F:GO:0045340; F:GO:0046872; C:GO:0042597	P:mercury ion transport; P:response to mercury ion; F:mercury ion transmembrane transporter activity; F:mercury ion binding; F:metal ion binding; C:periplasmic space
WP_003089544.1	MULTISPECIES: FecR family protein [Pseudomonas]	12	4	7	4	37.5	170	4	0	Yes	-3.32541	0.000147969	Down	-1.74179	0.00683408	Down	1.95319	0.00209268	Up										PT	C:GO:0016021	C:integral component of membrane			IPR006860 (PFAM); G3DSA:2.60.120.1440 (GENE3D); IPR012373 (PIRSF); IPR032623 (PFAM); IPR012373 (PANTHER)	no GO terms	no GO terms
WP_034065451.1	SAM-dependent DNA methyltransferase [Pseudomonas aeruginosa]	17	11	23	11	74.2	458	11	0	Yes	1.42785	0.18595		1.53873	0.116641		1.95291	0.0336383	Up										V	P:GO:0006306; P:GO:0090305; F:GO:0003677; F:GO:0004519; F:GO:0008170	P:DNA methylation; P:nucleic acid phosphodiester bond hydrolysis; F:DNA binding; F:endonuclease activity; F:N-methyltransferase activity	EC:3.1; EC:2.1.1	Acting on ester bonds; Transferring one-carbon groups	PR00507 (PRINTS); IPR003356 (PFAM); G3DSA:3.40.50.150 (GENE3D); IPR038333 (G3DSA:1.20.1260.GENE3D); IPR022749 (PFAM); PTHR42933:SF3 (PANTHER); PTHR42933 (PANTHER); IPR002052 (PROSITE_PATTERNS); IPR029063 (SUPERFAMILY)	P:GO:0006306; P:GO:0032259; F:GO:0003676; F:GO:0003677; F:GO:0008168; F:GO:0008170	P:DNA methylation; P:methylation; F:nucleic acid binding; F:DNA binding; F:methyltransferase activity; F:N-methyltransferase activity
WP_003094997.1	MULTISPECIES: peptide chain release factor 1 [Pseudomonas]	34	10	28	10	40	929	10	0	Yes	1.17398	0.0302653		1.04312	0.357024		1.9513	2.0848e-05	Up	1.19185	0.0388704		PA4665	prfA	peptide chain release factor 1	prfA	-1.29703	0.0370254	J	P:GO:0006415; F:GO:0016149; F:GO:0043022; C:GO:0005829	P:translational termination; F:translation release factor activity, codon specific; F:ribosome binding; C:cytosol			Coil (COILS); Coil (COILS); IPR004373 (TIGRFAM); G3DSA:6.10.140.1950 (GENE3D); IPR000352 (PFAM); G3DSA:3.30.70.1660 (GENE3D); IPR005139 (PFAM); G3DSA:3.30.160.20 (GENE3D); PTHR43804 (PANTHER); PTHR43804:SF7 (PANTHER); IPR000352 (PROSITE_PATTERNS); IPR004373 (HAMAP); IPR045853 (SUPERFAMILY)	P:GO:0006415; F:GO:0003747; F:GO:0016149	P:translational termination; F:translation release factor activity; F:translation release factor activity, codon specific
WP_003097243.1	MULTISPECIES: ParA family protein [Pseudomonas]	16	4	9	4	28.6	212	4	0	Yes	1.19152	0.0170187		1.29981	0.00525006		1.94678	0.000225184	Up	1.19748	0.0193428		PA5563	soj	chromosome partitioning protein Soj	soj	1.08394	0.394317	D					PIRSF009320 (PIRSF); IPR025669 (PFAM); IPR027417 (G3DSA:3.40.50.GENE3D); PTHR13696:SF90 (PANTHER); PTHR13696 (PANTHER); cd02042 (CDD); IPR027417 (SUPERFAMILY)	no GO terms	no GO terms
WP_003089729.1	MULTISPECIES: YgdI/YgdR family lipoprotein [Pseudomonas]	30	2	5	2	8.1	109	2	0	Yes	1.24349	0.0199187		-1.97524	0.00163726	Down	1.94648	0.000120074	Up	-1.62777	0.000789638	Lower	PA2453		hypothetical protein	PA2453	1.11214	0.412059	S					G3DSA:2.30.30.100 (GENE3D); IPR010305 (PFAM); IPR010305 (PANTHER); PTHR37011:SF1 (PANTHER); PS51257 (PROSITE_PROFILES); IPR010920 (SUPERFAMILY)	no GO terms	no GO terms
WP_003092811.1	MULTISPECIES: nucleoside-diphosphate kinase [Pseudomonas]	54	7	46	7	15.6	1132	7	0	Yes	1.11608	0.148698		-1.02891	0.72239		1.939	0.00015818	Up	-1.46765	0.00232947		PA3807	ndk	nucleoside diphosphate kinase	ndk	1.27913	0.125806	F	P:GO:0006165; P:GO:0006183; P:GO:0006228; P:GO:0006241; P:GO:0042121; P:GO:0090305; F:GO:0004519; F:GO:0004550; F:GO:0005524; F:GO:0046872; C:GO:0005829	P:nucleoside diphosphate phosphorylation; P:GTP biosynthetic process; P:UTP biosynthetic process; P:CTP biosynthetic process; P:alginic acid biosynthetic process; P:nucleic acid phosphodiester bond hydrolysis; F:endonuclease activity; F:nucleoside diphosphate kinase activity; F:ATP binding; F:metal ion binding; C:cytosol	EC:3.1; EC:2.7.4.6	Acting on ester bonds; Nucleoside-diphosphate kinase	Coil (COILS); IPR001564 (PRINTS); IPR034907 (PFAM); IPR036850 (G3DSA:3.30.70.GENE3D); PTHR11349 (PANTHER); PTHR11349:SF101 (PANTHER); IPR023005 (PROSITE_PATTERNS); IPR001564 (HAMAP); cd04413 (CDD); IPR036850 (SUPERFAMILY)	P:GO:0006165; P:GO:0006183; P:GO:0006228; P:GO:0006241; F:GO:0004550	P:nucleoside diphosphate phosphorylation; P:GTP biosynthetic process; P:UTP biosynthetic process; P:CTP biosynthetic process; F:nucleoside diphosphate kinase activity
WP_003091288.1	MULTISPECIES: pellicle/biofilm biosynthesis outer membrane protein PelC [Pseudomonas]	45	5	9	5	18.7	212	5	0	Yes	1.09828	0.335968		-1.0209	0.739169		1.93877	0.000480041	Up	2.93868	0.00130236	Higher	PA3062	pelC	PelC	pelC	-1.25343	0.30228	S	P:GO:0015774; P:GO:0044010; P:GO:0045226	P:polysaccharide transport; P:single-species biofilm formation; P:extracellular polysaccharide biosynthetic process			G3DSA:3.40.50.10610 (GENE3D); PS51257 (PROSITE_PROFILES)	no GO terms	no GO terms
WP_003088853.1	MULTISPECIES: ParB-like nuclease domain-containing protein [Pseudomonas]	20	3	4	3	23.7	126	3	0	Yes	1.09295	0.6344		1.2249	0.700667		1.93693	0.0163981	Up	1.40607	0.258057		PA2126	cgrC	cupA gene regulator C, CgrC	PA2126	1.25938	0.0570359	K	P:GO:0071453; F:GO:0000976; F:GO:0005515	P:cellular response to oxygen levels; F:transcription cis-regulatory region binding; F:protein binding			IPR003115 (PFAM); G3DSA:3.90.1530.10 (GENE3D); PTHR30083:SF1 (PANTHER); PTHR30083 (PANTHER); cd16397 (CDD); IPR036086 (SUPERFAMILY)	no GO terms	no GO terms
WP_003090437.1	MULTISPECIES: NADP-dependent isocitrate dehydrogenase [Pseudomonas]	47	28	165	28	81.6	3826	28	0	Yes	-1.04956	0.293949		-1.05226	0.099677		1.93514	2.28582e-05	Up	-1.0464	0.121947		PA2624	idh	isocitrate dehydrogenase	idh	1.44474	0.114695	C	P:GO:0006097; P:GO:0006099; F:GO:0004450; F:GO:0046872	P:glyoxylate cycle; P:tricarboxylic acid cycle; F:isocitrate dehydrogenase (NADP+) activity; F:metal ion binding	EC:1.1.1.42	Isocitrate dehydrogenase (NADP(+))	IPR004436 (PFAM); IPR004436 (PIRSF); IPR004436 (TIGRFAM); IPR004436 (PANTHER); SSF53659 (SUPERFAMILY)	P:GO:0006099; F:GO:0004450	P:tricarboxylic acid cycle; F:isocitrate dehydrogenase (NADP+) activity
WP_003094064.1	MULTISPECIES: co-chaperone GroES [Pseudomonas]	49	4	41	4	10.3	1367	4	0	Yes	1.22836	0.011167		1.48703	0.0263959		1.93432	0.00114517	Up	1.16067	0.0466958		PA4386	groES	GroES protein	groES	1.67712	0.00791732	O	P:GO:0009408; P:GO:0019068; P:GO:0044403; P:GO:0051085; F:GO:0005524; F:GO:0016887; F:GO:0042802; F:GO:0046872; F:GO:0051082; F:GO:0051087; C:GO:1990220	P:response to heat; P:virion assembly; P:biological process involved in symbiotic interaction; P:chaperone cofactor-dependent protein refolding; F:ATP binding; F:ATP hydrolysis activity; F:identical protein binding; F:metal ion binding; F:unfolded protein binding; F:chaperone binding; C:GroEL-GroES complex	EC:3.6.1	Acting on acid anhydrides	IPR020818 (PRINTS); IPR020818 (PFAM); IPR037124 (G3DSA:2.30.33.GENE3D); IPR020818 (PANTHER); PTHR10772:SF24 (PANTHER); IPR018369 (PROSITE_PATTERNS); IPR020818 (HAMAP); IPR020818 (CDD); IPR011032 (SUPERFAMILY)	P:GO:0006457; F:GO:0005524; F:GO:0016887	P:protein folding; F:ATP binding; F:ATP hydrolysis activity
WP_002553999.1	MULTISPECIES: translation initiation factor IF-1 [Bacteria]	36	2	9	2	8.3	219	2	0	Yes	1.03327	0.558764		-1.1781	0.0592189		1.92948	0.000187956	Up	-1.54177	0.00153163	Lower	PA2619	infA	initiation factor	infA	-1.03872	0.712084	J	P:GO:0006413; F:GO:0003743; F:GO:0019843; F:GO:0043022; C:GO:0005829	P:translational initiation; F:translation initiation factor activity; F:rRNA binding; F:ribosome binding; C:cytosol			G3DSA:2.40.50.140 (GENE3D); IPR004368 (TIGRFAM); IPR006196 (PFAM); IPR004368 (PANTHER); PTHR33370:SF1 (PANTHER); IPR004368 (HAMAP); IPR006196 (PROSITE_PROFILES); IPR004368 (CDD); IPR012340 (SUPERFAMILY)	P:GO:0006413; F:GO:0003723; F:GO:0003743	P:translational initiation; F:RNA binding; F:translation initiation factor activity
WP_003094838.1	MULTISPECIES: multidrug efflux RND transporter permease subunit MexD [Pseudomonas]	16	13	21	10	111.5	337	13	0	Yes	1.1192	0.220445		1.09784	0.1449		1.92595	2.19526e-06	Up	1.27563	0.00206967		PA4598	mexD	Resistance-Nodulation-Cell Division (RND) multidrug efflux transporter MexD	mexD	-1.09628	0.687423	U	P:GO:0009410; P:GO:0042908; P:GO:0051301; P:GO:0055085; F:GO:0015562; F:GO:0042910; C:GO:0005886; C:GO:0016021	P:response to xenobiotic stimulus; P:xenobiotic transport; P:cell division; P:transmembrane transport; F:efflux transmembrane transporter activity; F:xenobiotic transmembrane transporter activity; C:plasma membrane; C:integral component of membrane	EC:7	Translocases	IPR001036 (PRINTS); IPR027463 (G3DSA:3.30.2090.GENE3D); G3DSA:3.30.70.1320 (GENE3D); IPR027463 (G3DSA:3.30.2090.GENE3D); G3DSA:3.30.70.1430 (GENE3D); IPR001036 (PFAM); G3DSA:3.30.70.1440 (GENE3D); G3DSA:1.20.1640.10 (GENE3D); G3DSA:1.20.1640.10 (GENE3D); G3DSA:3.30.70.1430 (GENE3D); IPR004764 (TIGRFAM); PTHR32063:SF10 (PANTHER); IPR001036 (PANTHER); IPR000731 (PROSITE_PROFILES); SSF82693 (SUPERFA…	P:GO:0042908; P:GO:0055085; F:GO:0015562; F:GO:0022857; C:GO:0016020; C:GO:0016021	P:xenobiotic transport; P:transmembrane transport; F:efflux transmembrane transporter activity; F:transmembrane transporter activity; C:membrane; C:integral component of membrane
WP_003084635.1	MULTISPECIES: DEAD/DEAH box helicase [Pseudomonas]	50	28	124	28	70.1	2854	28	0	Yes	-1.0174	0.90636		-1.40429	0.0154496		1.92579	0.000588891	Up	1.32497	0.0317426		PA0428		probable ATP-dependent RNA helicase	PA0428	-1.05487	0.804223	JKL	P:GO:0042255; F:GO:0003676; F:GO:0003724; F:GO:0005524; C:GO:0005737	P:ribosome assembly; F:nucleic acid binding; F:RNA helicase activity; F:ATP binding; C:cytoplasm	EC:3.6.4.13	RNA helicase	IPR027417 (G3DSA:3.40.50.GENE3D); IPR011545 (PFAM); IPR001650 (PFAM); IPR027417 (G3DSA:3.40.50.GENE3D); mobidb-lite (MOBIDB_LITE); mobidb-lite (MOBIDB_LITE); mobidb-lite (MOBIDB_LITE); mobidb-lite (MOBIDB_LITE); mobidb-lite (MOBIDB_LITE); PTHR47959 (PANTHER); PTHR47959:SF1 (PANTHER); IPR000629 (PROSITE_PATTERNS); IPR028622 (HAMAP); IPR001650 (PROSITE_PROFILES); IPR014001 (PROSITE_PROFILES); IPR01…	P:GO:0042255; F:GO:0003676; F:GO:0003724; F:GO:0005524	P:ribosome assembly; F:nucleic acid binding; F:RNA helicase activity; F:ATP binding
WP_003091215.1	MULTISPECIES: ATP-binding cassette domain-containing protein [Pseudomonas]	29	17	43	17	71.1	1271	17	0	Yes	0.997019	0.922487		1.11028	0.0128747		1.9231	1.53038e-06	Up	1.05636	0.205839		PA3019		probable ATP-binding component of ABC transporter	PA3019	-1.35329	0.0071455	S	P:GO:0006281; P:GO:0006438; P:GO:0009314; P:GO:0070894; F:GO:0003677; F:GO:0004832; F:GO:0005524; F:GO:0016887; C:GO:0005737; C:GO:0005886	P:DNA repair; P:valyl-tRNA aminoacylation; P:response to radiation; P:regulation of transposon integration; F:DNA binding; F:valine-tRNA ligase activity; F:ATP binding; F:ATP hydrolysis activity; C:cytoplasm; C:plasma membrane	EC:3.6.1; EC:6.1.1.9	Acting on acid anhydrides; Valine--tRNA ligase	Coil (COILS); IPR032781 (PFAM); IPR027417 (G3DSA:3.40.50.GENE3D); IPR032524 (PFAM); IPR027417 (G3DSA:3.40.50.GENE3D); IPR037118 (G3DSA:1.10.287.GENE3D); IPR003439 (PFAM); IPR003439 (PFAM); PTHR19211:SF69 (PANTHER); PTHR19211 (PANTHER); IPR017871 (PROSITE_PATTERNS); IPR017871 (PROSITE_PATTERNS); IPR043686 (HAMAP); IPR003439 (PROSITE_PROFILES); IPR003439 (PROSITE_PROFILES); cd03221 (CDD); cd03221 (…	P:GO:0006281; F:GO:0003677; F:GO:0005524; F:GO:0016887	P:DNA repair; F:DNA binding; F:ATP binding; F:ATP hydrolysis activity
WP_031628111.1	MULTISPECIES: YggU family protein [Pseudomonas]	21	2	3	2	11	102	2	0	Yes	-1.00604	0.914311		1.10984	0.147329		1.92257	0.000592181	Up										S					IPR003746 (PFAM); IPR036591 (G3DSA:3.30.1200.GENE3D); IPR005228 (TIGRFAM); IPR003746 (PANTHER); IPR003746 (HAMAP); IPR036591 (SUPERFAMILY)	no GO terms	no GO terms
WP_019726887.1	His-Xaa-Ser system radical SAM maturase HxsC [Pseudomonas aeruginosa]	10	4	9	4	45.9	295	4	0	Yes	1.32098	0.0740289		1.29669	0.0839258		1.91853	0.00382349	Up										S	F:GO:0003824; F:GO:0051536	F:catalytic activity; F:iron-sulfur cluster binding			PF13394 (PFAM); IPR007197 (PFAM); IPR013785 (G3DSA:3.20.20.GENE3D); IPR024032 (TIGRFAM); IPR007197 (SFLD); IPR024032 (SFLD); SFLDG01067 (SFLD); PTHR11228:SF7 (PANTHER); PTHR11228 (PANTHER); cd01335 (CDD); SSF102114 (SUPERFAMILY)	F:GO:0003824; F:GO:0051536	F:catalytic activity; F:iron-sulfur cluster binding
WP_003092534.1	MULTISPECIES: chemotaxis response regulator protein-glutamate methylesterase [Pseudomonas]	16	4	9	4	35.7	201	4	0	Yes	1.07426	0.651595		1.33834	0.136048		1.90858	0.441047		-1.34853	0.149373		PA3703	wspF	probable methylesterase	wspF	1.27099	0.0894375	NT	P:GO:0000160; P:GO:0006482; P:GO:0006935; P:GO:0018277; F:GO:0000156; F:GO:0008984; F:GO:0050568; C:GO:0005737	P:phosphorelay signal transduction system; P:protein demethylation; P:chemotaxis; P:protein deamination; F:phosphorelay response regulator activity; F:protein-glutamate methylesterase activity; F:protein-glutamine glutaminase activity; C:cytoplasm	EC:3.5.1.44; EC:3.1.1.61; EC:3.1.1.1	Protein-glutamine glutaminase; Protein-glutamate methylesterase; Carboxylesterase	IPR035909 (G3DSA:3.40.50.GENE3D); G3DSA:3.40.50.2300 (GENE3D); IPR001789 (PFAM); IPR008248 (PIRSF); IPR000673 (PFAM); PTHR42872:SF6 (PANTHER); PTHR42872 (PANTHER); IPR008248 (HAMAP); IPR001789 (PROSITE_PROFILES); IPR000673 (PROSITE_PROFILES); IPR000673 (CDD); cd17541 (CDD); IPR035909 (SUPERFAMILY); IPR011006 (SUPERFAMILY)	P:GO:0000160; P:GO:0006935; F:GO:0000156; F:GO:0008984; C:GO:0005737	P:phosphorelay signal transduction system; P:chemotaxis; F:phosphorelay response regulator activity; F:protein-glutamate methylesterase activity; C:cytoplasm
WP_003094302.1	MULTISPECIES: alpha/beta hydrolase [Pseudomonas]	32	6	17	6	22.3	450	6	0	Yes	1.0974	0.272024		1.06301	0.345603		1.90814	0.000335746	Up	-1.26536	0.0123739		PA4440		hypothetical protein	PA4440	1.12456	0.407064	S	P:GO:0009058; F:GO:0016788	P:biosynthetic process; F:hydrolase activity, acting on ester bonds	EC:3.1	Acting on ester bonds	IPR029058 (G3DSA:3.40.50.GENE3D); IPR001031 (PFAM); PTHR12277 (PANTHER); PTHR12277:SF79 (PANTHER); IPR029058 (SUPERFAMILY)	P:GO:0009058	P:biosynthetic process
WP_003095122.1	MULTISPECIES: RNA polymerase-binding protein DksA [Pseudomonas]	50	7	51	7	17.3	1360	7	0	Yes	1.28141	0.115968		-1.51627	0.0359582	Down	1.90734	0.00505451	Up	-1.48445	0.0372947		PA4723	dksA	suppressor protein DksA	dksA	1.00589	0.969822	T	P:GO:0045861; P:GO:0045892; P:GO:0051055; P:GO:1901857; P:GO:2000679; F:GO:0008270; F:GO:0070063; C:GO:0005829	P:negative regulation of proteolysis; P:negative regulation of transcription, DNA-templated; P:negative regulation of lipid biosynthetic process; P:positive regulation of cellular respiration; P:positive regulation of transcription regulatory region DNA binding; F:zinc ion binding; F:RNA polymerase binding; C:cytosol			Coil (COILS); IPR020460 (PRINTS); IPR000962 (PFAM); IPR012784 (TIGRFAM); G3DSA:1.20.120.910 (GENE3D); mobidb-lite (MOBIDB_LITE); mobidb-lite (MOBIDB_LITE); mobidb-lite (MOBIDB_LITE); PTHR33823:SF2 (PANTHER); PTHR33823 (PANTHER); IPR020458 (PROSITE_PATTERNS); IPR000962 (PROSITE_PROFILES); IPR012784 (HAMAP); IPR037187 (SUPERFAMILY); SSF57716 (SUPERFAMILY)	F:GO:0008270	F:zinc ion binding
WP_003095190.1	MULTISPECIES: translation initiation factor IF-2 [Pseudomonas]	42	28	147	28	90.8	4223	28	0	Yes	1.02043	0.603158		-1.42151	0.000277729		1.8995	6.19284e-05	Up	1.07096	0.202921		PA4744	infB	translation initiation factor IF-2	infB	1.56229	0.13158	J	P:GO:0006413; F:GO:0003743; F:GO:0003924; F:GO:0005525; F:GO:0032550; F:GO:0043024; F:GO:0097216; C:GO:0005829	P:translational initiation; F:translation initiation factor activity; F:GTPase activity; F:GTP binding; F:purine ribonucleoside binding; F:ribosomal small subunit binding; F:guanosine tetraphosphate binding; C:cytosol	EC:3.6.1	Acting on acid anhydrides	Coil (COILS); IPR000795 (PFAM); G3DSA:3.30.56.50 (GENE3D); IPR013575 (PFAM); G3DSA:2.40.30.10 (GENE3D); IPR036925 (G3DSA:3.40.50.GENE3D); IPR027417 (G3DSA:3.40.50.GENE3D); G3DSA:2.40.30.10 (GENE3D); IPR006847 (PFAM); IPR005225 (TIGRFAM); IPR000178 (TIGRFAM); IPR023115 (PFAM); mobidb-lite (MOBIDB_LITE); mobidb-lite (MOBIDB_LITE); mobidb-lite (MOBIDB_LITE); mobidb-lite (MOBIDB_LITE); IPR015760 (PAN…	P:GO:0006413; F:GO:0003743; F:GO:0003924; F:GO:0005525	P:translational initiation; F:translation initiation factor activity; F:GTPase activity; F:GTP binding
WP_003090914.1	MULTISPECIES: hypothetical protein [Pseudomonas]	31	4	6	4	16.4	232	4	0	Yes	1.04354	0.713827		-1.40425	0.123826		1.89628	0.0145573	Up	-1.06411	0.630032		PA2829		hypothetical protein	PA2829	-1.0343	0.770018						no IPS match	no IPS match	no IPS match
WP_071533943.1	MULTISPECIES: Asp-tRNA(Asn)/Glu-tRNA(Gln) amidotransferase subunit GatB [Pseudomonas]	47	19	83	19	54.6	2295	19	0	Yes	-1.00918	0.826984		1.0446	0.223885		1.8929	3.82535e-06	Up										J	P:GO:0006412; F:GO:0005524; F:GO:0016740; F:GO:0050567	P:translation; F:ATP binding; F:transferase activity; F:glutaminyl-tRNA synthase (glutamine-hydrolyzing) activity	EC:6.3.5.7; EC:2	Glutaminyl-tRNA synthase (glutamine-hydrolyzing); Transferases	IPR018027 (PFAM); IPR023168 (G3DSA:1.10.10.GENE3D); IPR004413 (TIGRFAM); IPR006075 (PFAM); IPR042114 (G3DSA:1.10.150.GENE3D); PTHR11659:SF0 (PANTHER); IPR017959 (PANTHER); IPR017958 (PROSITE_PATTERNS); IPR004413 (HAMAP); IPR014746 (SUPERFAMILY); IPR003789 (SUPERFAMILY)	F:GO:0003824; F:GO:0016874; F:GO:0016884	F:catalytic activity; F:ligase activity; F:carbon-nitrogen ligase activity, with glutamine as amido-N-donor
WP_003084512.1	MULTISPECIES: monofunctional biosynthetic peptidoglycan transglycosylase [Pseudomonas]	15	3	6	3	27.8	191	3	0	Yes	1.16141	0.16296		-2.08148	0.000431093	Down	1.89273	0.00082812	Up	1.70082	0.00217017	Higher	PA0378		probable transglycosylase	PA0378	-1.11448	0.272214	M	P:GO:0008360; P:GO:0043164; P:GO:0071555; F:GO:0008955; F:GO:0016763; C:GO:0005886; C:GO:0016021	P:regulation of cell shape; P:Gram-negative-bacterium-type cell wall biogenesis; P:cell wall organization; F:peptidoglycan glycosyltransferase activity; F:pentosyltransferase activity; C:plasma membrane; C:integral component of membrane	EC:2.4.2; EC:2.4.1.129	Glycosyltransferases; Peptidoglycan glycosyltransferase	IPR011812 (TIGRFAM); IPR001264 (PFAM); IPR036950 (G3DSA:1.10.3810.GENE3D); IPR011812 (PANTHER); IPR011812 (HAMAP); IPR023346 (SUPERFAMILY)	P:GO:0009252; F:GO:0016763; C:GO:0009274; C:GO:0016021	P:peptidoglycan biosynthetic process; F:pentosyltransferase activity; C:peptidoglycan-based cell wall; C:integral component of membrane
WP_003096058.1	MULTISPECIES: rhodanese-like domain-containing protein [Pseudomonas]	44	5	14	5	15	312	5	0	Yes	-1.09455	0.346102		-1.16404	0.113831		1.8916	0.000523705	Up	-1.01321	0.797394		PA5130		conserved hypothetical protein	PA5130	-1.41414	6.16e-05	P	F:GO:0004792; C:GO:0005829; C:GO:0016021	F:thiosulfate sulfurtransferase activity; C:cytosol; C:integral component of membrane	EC:2.8.1.1	Thiosulfate sulfurtransferase	IPR036873 (G3DSA:3.40.250.GENE3D); IPR001763 (PFAM); PTHR43031:SF3 (PANTHER); PTHR43031 (PANTHER); IPR001763 (PROSITE_PROFILES); cd00158 (CDD); IPR036873 (SUPERFAMILY)	no GO terms	no GO terms
WP_003094115.1	MULTISPECIES: cell division protein FtsA [Pseudomonas]	54	19	92	19	44.6	2556	19	0	Yes	1.1869	0.00242803		1.43681	5.13102e-07		1.89133	3.0874e-09	Up	-1.16071	0.000622217		PA4408	ftsA	cell division protein FtsA	ftsA	1.93082	4e-14	D	P:GO:0043093; F:GO:0005524; F:GO:0042802; C:GO:0005829; C:GO:0009898; C:GO:0032153	P:FtsZ-dependent cytokinesis; F:ATP binding; F:identical protein binding; C:cytosol; C:cytoplasmic side of plasma membrane; C:cell division site			Coil (COILS); PF14450 (PFAM); PF14450 (PFAM); G3DSA:3.30.420.40 (GENE3D); IPR020823 (TIGRFAM); IPR020823 (PIRSF); IPR003494 (PFAM); G3DSA:3.30.420.40 (GENE3D); G3DSA:3.30.1490.110 (GENE3D); PTHR32432:SF4 (PANTHER); PTHR32432 (PANTHER); IPR020823 (HAMAP); cd00012 (CDD); IPR043129 (SUPERFAMILY); IPR043129 (SUPERFAMILY)	P:GO:0051301; F:GO:0005515	P:cell division; F:protein binding
WP_003095204.1	MULTISPECIES: ribosome assembly RNA-binding protein YhbY [Pseudomonas]	31	4	16	4	11.7	309	4	0	Yes	-1.08788	0.0297374		-1.36697	0.000207917		1.88858	7.76333e-07	Up	-1.04596	0.322061		PA4753		conserved hypothetical protein	PA4753	1.01645	0.818274	J	P:GO:0000027; P:GO:0000028; P:GO:0000967; F:GO:0003723; F:GO:1990275; C:GO:0005829	P:ribosomal large subunit assembly; P:ribosomal small subunit assembly; P:rRNA 5'-end processing; F:RNA binding; F:preribosome binding; C:cytosol			Coil (COILS); IPR001890 (PFAM); IPR017924 (TIGRFAM); IPR035920 (G3DSA:3.30.110.GENE3D); PTHR40065 (PANTHER); IPR001890 (PROSITE_PROFILES); IPR035920 (SUPERFAMILY)	F:GO:0003723	F:RNA binding
WP_015972868.1	hypothetical protein [Pseudomonas aeruginosa]	62	4	9	4	9.9	231	4	0	Yes	-1.04104	0.789138		-2.58427	0.0024825	Down	1.88145	0.00323133	Up											P:GO:0098672	P:inhibition of host CRISPR-cas system by virus			Coil (COILS)	no GO terms	no GO terms
WP_003099089.1	MULTISPECIES: translation initiation factor IF-3 [Pseudomonas]	51	7	62	7	20.1	1713	7	0	Yes	-1.08139	0.232482		-1.29657	0.00786482		1.88134	0.00051961	Up				PA2743	infC	translation initiation factor IF-3	infC	1.82539	0.00931528	J	P:GO:0009409; P:GO:0032790; P:GO:0032988; P:GO:1901195; P:GO:1904690; P:GO:2000767; F:GO:0003743; F:GO:0043022; F:GO:0043024; F:GO:1990856; C:GO:0005829; C:GO:0005886; C:GO:0070992	P:response to cold; P:ribosome disassembly; P:ribonucleoprotein complex disassembly; P:positive regulation of formation of translation preinitiation complex; P:positive regulation of cytoplasmic translational initiation; P:positive regulation of cytoplasmic translation; F:translation initiation factor activity; F:ribosome binding; F:ribosomal small subunit binding; F:methionyl-initiator methionin…			Coil (COILS); IPR001288 (TIGRFAM); IPR019814 (PFAM); IPR036787 (G3DSA:3.10.20.GENE3D); IPR019815 (PFAM); IPR036788 (G3DSA:3.30.110.GENE3D); PTHR10938:SF0 (PANTHER); IPR001288 (PANTHER); IPR001288 (HAMAP); IPR036787 (SUPERFAMILY); IPR036788 (SUPERFAMILY)	P:GO:0006413; F:GO:0003743	P:translational initiation; F:translation initiation factor activity
WP_003160813.1	MULTISPECIES: S8 family peptidase [Proteobacteria]	18	13	18	13	91.7	351	13	0	Yes	1.23645	0.0202074		1.26365	0.0125299		1.8808	0.000172659	Up										O	P:GO:0006508; F:GO:0004252	P:proteolysis; F:serine-type endopeptidase activity	EC:3.4.21	Acting on peptide bonds (peptidases)	IPR015500 (PRINTS); IPR000209 (PFAM); IPR036852 (G3DSA:3.40.50.GENE3D); mobidb-lite (MOBIDB_LITE); PTHR43806:SF37 (PANTHER); PTHR43806 (PANTHER); IPR034074 (CDD); IPR036852 (SUPERFAMILY)	P:GO:0006508; F:GO:0004252; F:GO:0008236	P:proteolysis; F:serine-type endopeptidase activity; F:serine-type peptidase activity
WP_003162695.1	MULTISPECIES: hypothetical protein [Pseudomonas]	46	25	112	25	80	3155	25	0	Yes	1.23047	0.000842723		1.05341	0.121135		1.88011	1.53485e-06	Up	4.54397	1.69326e-06	Higher	PA5441		hypothetical protein	PA5441	1.23577	0.0620159	S					mobidb-lite (MOBIDB_LITE); mobidb-lite (MOBIDB_LITE)	no GO terms	no GO terms
WP_003095236.1	MULTISPECIES: adenosylmethionine decarboxylase [Pseudomonas]	22	3	8	3	17.3	52	3	0	Yes	-1.01593	0.843193		-1.15729	0.375766		1.87977	0.000150839	Up	1.92843	0.000577121	Higher	PA4773	speD2	SpeD2	PA4773	1.43799	0.206238	E	P:GO:0006557; P:GO:0008295; F:GO:0004014; C:GO:0005829	P:S-adenosylmethioninamine biosynthetic process; P:spermidine biosynthetic process; F:adenosylmethionine decarboxylase activity; C:cytosol	EC:4.1.1.50	Adenosylmethionine decarboxylase	G3DSA:3.60.90.10 (GENE3D); IPR017716 (TIGRFAM); IPR003826 (PFAM); PTHR33866:SF2 (PANTHER); IPR003826 (PANTHER); IPR017716 (HAMAP); IPR016067 (SUPERFAMILY)	P:GO:0008295; F:GO:0004014	P:spermidine biosynthetic process; F:adenosylmethionine decarboxylase activity
WP_003098840.1	MULTISPECIES: KpsF/GutQ family sugar-phosphate isomerase [Pseudomonas]	34	10	38	10	33.9	966	10	0	Yes	-1.11984	0.0210957		1.05748	0.0888959		1.87742	1.09692e-06	Up				PA4457		arabinose-5-phosphate isomerase KdsD	PA4457	-1.06372	0.430606	M	P:GO:0019294; F:GO:0019146; F:GO:0046872; F:GO:0097367	P:keto-3-deoxy-D-manno-octulosonic acid biosynthetic process; F:arabinose-5-phosphate isomerase activity; F:metal ion binding; F:carbohydrate derivative binding	EC:5.3.1.13	Arabinose-5-phosphate isomerase	G3DSA:3.40.50.10490 (GENE3D); IPR000644 (PFAM); IPR004800 (TIGRFAM); G3DSA:3.10.580.10 (GENE3D); IPR001347 (PFAM); IPR004800 (PIRSF); PTHR42745 (PANTHER); IPR000644 (PROSITE_PROFILES); IPR000644 (PROSITE_PROFILES); IPR001347 (PROSITE_PROFILES); cd04604 (CDD); IPR035474 (CDD); SSF53697 (SUPERFAMILY)	P:GO:0005975; P:GO:1901135; F:GO:0016853; F:GO:0097367	P:carbohydrate metabolic process; P:carbohydrate derivative metabolic process; F:isomerase activity; F:carbohydrate derivative binding
WP_003096586.1	MULTISPECIES: orotate phosphoribosyltransferase [Proteobacteria]	50	9	28	9	23.3	954	9	0	Yes	1.1635	0.000658725		-1.09765	0.0314712		1.87131	5.96496e-07	Up	-1.51582	0.000580465	Lower	PA5331	pyrE	orotate phosphoribosyltransferase	pyrE	1.05068	0.574444	F	P:GO:0006207; P:GO:0044205; P:GO:0046132; F:GO:0000287; F:GO:0004588; C:GO:0005829	P:'de novo' pyrimidine nucleobase biosynthetic process; P:'de novo' UMP biosynthetic process; P:pyrimidine ribonucleoside biosynthetic process; F:magnesium ion binding; F:orotate phosphoribosyltransferase activity; C:cytosol	EC:2.4.2.10	Orotate phosphoribosyltransferase	IPR000836 (PFAM); IPR029057 (G3DSA:3.40.50.GENE3D); IPR004467 (TIGRFAM); PTHR46683 (PANTHER); IPR023031 (HAMAP); IPR000836 (CDD); IPR029057 (SUPERFAMILY)	P:GO:0006221; F:GO:0004588	P:pyrimidine nucleotide biosynthetic process; F:orotate phosphoribosyltransferase activity
WP_003094339.1	MULTISPECIES: outer membrane lipid asymmetry maintenance protein MlaD [Pseudomonas]	38	5	18	5	16.5	614	5	0	Yes	-1.07519	0.678835		1.00293	0.879069		1.86853	0.00687445	Up	-1.22114	0.170107		PA4454		conserved hypothetical protein	PA4454	1.17269	0.0111392	Q	P:GO:0015914; F:GO:0005543; F:GO:0005548; F:GO:0043168; C:GO:0005886	P:phospholipid transport; F:phospholipid binding; F:phospholipid transporter activity; F:anion binding; C:plasma membrane	EC:7	Translocases	IPR003399 (PFAM); IPR030970 (TIGRFAM); PTHR33371 (PANTHER); PTHR33371:SF4 (PANTHER)	P:GO:0015914	P:phospholipid transport
WP_003086638.1	MULTISPECIES: glutathione-regulated potassium-efflux system protein KefB [Pseudomonas]	17	9	19	9	66.3	479	9	0	Yes	1.16051	0.0466615		-1.18535	0.00143952		1.86698	0.000198067	Up	-1.14928	0.0397842		PA1207	kefB	glutathione-regulated potassium-efflux system protein KefB	kefB	1.14087	0.00303818	P	P:GO:0006813; P:GO:1902600; F:GO:0015299; C:GO:0005887	P:potassium ion transport; P:proton transmembrane transport; F:solute:proton antiporter activity; C:integral component of plasma membrane	EC:7	Translocases	IPR006153 (PFAM); IPR038770 (G3DSA:1.20.1530.GENE3D); IPR004771 (TIGRFAM); IPR003148 (PFAM); G3DSA:3.40.50.720 (GENE3D); PTHR46157 (PANTHER); IPR003148 (PROSITE_PROFILES); IPR036291 (SUPERFAMILY)	P:GO:0006812; P:GO:0006813; P:GO:0055085; F:GO:0008324; F:GO:0015299; C:GO:0016021	P:cation transport; P:potassium ion transport; P:transmembrane transport; F:cation transmembrane transporter activity; F:solute:proton antiporter activity; C:integral component of membrane
WP_003095766.1	MULTISPECIES: carbamoyltransferase [Pseudomonas]	38	18	56	18	66	1633	18	0	Yes	1.1859	0.00956063		1.18424	0.00832924		1.86631	0.000140446	Up	1.01863	0.697332		PA5005		probable carbamoyl transferase	PA5005	1.02866	0.818252	O	P:GO:0009058; F:GO:0016740	P:biosynthetic process; F:transferase activity	EC:2	Transferases	IPR031730 (PFAM); IPR038152 (G3DSA:3.90.870.GENE3D); IPR003696 (PFAM); G3DSA:3.30.420.40 (GENE3D); G3DSA:3.30.420.40 (GENE3D); PTHR34847 (PANTHER); IPR043129 (SUPERFAMILY)	P:GO:0009058; F:GO:0003824	P:biosynthetic process; F:catalytic activity
WP_003085526.1	MULTISPECIES: sensor histidine kinase [Pseudomonas]	19	6	9	6	50.3	376	6	0	Yes	-1.0632	0.594406		-1.35915	0.0520219		1.86541	0.00200945	Up	-1.00924	0.890101		PA0757		probable two-component sensor	PA0757	-1.23791	0.00747643	T	P:GO:0000160; P:GO:0018106; F:GO:0000155; F:GO:0005524; C:GO:0016021	P:phosphorelay signal transduction system; P:peptidyl-histidine phosphorylation; F:phosphorelay sensor kinase activity; F:ATP binding; C:integral component of membrane	EC:2.7.3; EC:2.7.13.3	Transferring phosphorus-containing groups; Histidine kinase	IPR004358 (PRINTS); G3DSA:1.10.287.130 (GENE3D); IPR003660 (PFAM); IPR003594 (PFAM); IPR013727 (PFAM); IPR003661 (PFAM); IPR036890 (G3DSA:3.30.565.GENE3D); PTHR45436:SF1 (PANTHER); PTHR45436 (PANTHER); IPR005467 (PROSITE_PROFILES); IPR003660 (PROSITE_PROFILES); IPR003661 (CDD); cd00075 (CDD); IPR036890 (SUPERFAMILY); IPR036097 (SUPERFAMILY)	P:GO:0007165; P:GO:0016310; F:GO:0000155; F:GO:0016772; C:GO:0016021	P:signal transduction; P:phosphorylation; F:phosphorelay sensor kinase activity; F:transferase activity, transferring phosphorus-containing groups; C:integral component of membrane
WP_003084817.1	MULTISPECIES: allophanate hydrolase subunit 1 [Pseudomonas]	23	5	9	5	33	318	5	0	Yes	-1.06883	0.453409		1.45369	0.00412351		1.8636	0.000414462	Up				PA0495		hypothetical protein	PA0495	1.50213	0.2274	E	F:GO:0016787	F:hydrolase activity	EC:3	Hydrolases	IPR029000 (G3DSA:2.40.100.GENE3D); IPR003833 (PFAM); G3DSA:3.30.1360.40 (GENE3D); IPR010016 (PANTHER); SSF160467 (SUPERFAMILY); IPR029000 (SUPERFAMILY)	no GO terms	no GO terms
WP_023095283.1	MULTISPECIES: phosphoenolpyruvate--protein phosphotransferase [Pseudomonas]	31	24	66	24	101.5	2020	24	0	Yes	1.20507	0.132352		1.25497	0.0901701		1.86043	0.00326368	Up	-1.34581	0.0484523		PA3562	fruI	phosphotransferase system transporter enzyme I, FruI	fruI	1.13997	0.25449	G	P:GO:0009401; P:GO:0016310; P:GO:0032445; F:GO:0008965; F:GO:0016301; F:GO:0022877; C:GO:0019897	P:phosphoenolpyruvate-dependent sugar phosphotransferase system; P:phosphorylation; P:fructose import; F:phosphoenolpyruvate-protein phosphotransferase activity; F:kinase activity; F:protein-N(PI)-phosphohistidine-fructose phosphotransferase system transporter activity; C:extrinsic component of plasma membrane	EC:2.7.3.9; EC:7; EC:2.7.1.69	Phosphoenolpyruvate--protein phosphotransferase; Translocases; Transferring phosphorus-containing groups	IPR000032 (PRINTS); PR01736 (PRINTS); IPR006318 (TIGRFAM); IPR000032 (TIGRFAM); IPR035895 (G3DSA:3.30.1340.GENE3D); IPR000032 (PFAM); G3DSA:3.50.30.10 (GENE3D); IPR000121 (PFAM); IPR036618 (G3DSA:1.10.274.GENE3D); IPR002178 (PFAM); IPR016152 (G3DSA:3.40.930.GENE3D); IPR008731 (PFAM); IPR008279 (PFAM); IPR040442 (G3DSA:3.20.20.GENE3D); PTHR46244 (PANTHER); IPR002178 (PROSITE_PATTERNS); IPR023151 (…	P:GO:0009401; P:GO:0016310; F:GO:0003824; F:GO:0016772	P:phosphoenolpyruvate-dependent sugar phosphotransferase system; P:phosphorylation; F:catalytic activity; F:transferase activity, transferring phosphorus-containing groups
WP_003091179.1	MULTISPECIES: FAD:protein FMN transferase [Pseudomonas]	27	8	14	8	37.3	394	8	0	Yes	1.02604	0.624811		1.38318	0.0189882		1.8589	0.000271868	Up	-1.57565	0.000119231	Lower	PA2993		conserved hypothetical protein	PA2993	1.52413	0.0264957	H	P:GO:0017013; F:GO:0016740; F:GO:0046872; C:GO:0005886	P:protein flavinylation; F:transferase activity; F:metal ion binding; C:plasma membrane	EC:2	Transferases	IPR024932 (PFAM); IPR003374 (G3DSA:3.10.520.GENE3D); IPR024932 (PIRSF); IPR024932 (PANTHER); PS51257 (PROSITE_PROFILES); IPR003374 (SUPERFAMILY)	P:GO:0017013	P:protein flavinylation
WP_003095751.1	MULTISPECIES: toluene tolerance protein [Pseudomonas]	26	5	6	5	25	130	5	0	Yes	0.998136	0.968661		1.2733	0.0344808		1.85794	0.000429818	Up	-1.28001	0.0210307		PA4998		conserved hypothetical protein	PA4998	-1.28915	0.00642487	KLT					IPR011009 (SUPERFAMILY)	no GO terms	no GO terms
WP_003094322.1	MULTISPECIES: histidinol-phosphate transaminase [Pseudomonas]	32	9	26	9	38.6	620	9	0	Yes	1.0741	0.235734		1.14349	0.0701369		1.85651	0.000793449	Up	-1.10526	0.144139		PA4447	hisC1	histidinol-phosphate aminotransferase	hisC1	1.18342	0.288868	E	P:GO:0000105; F:GO:0004400; F:GO:0030170	P:histidine biosynthetic process; F:histidinol-phosphate transaminase activity; F:pyridoxal phosphate binding	EC:2.6.1.9	Histidinol-phosphate transaminase	IPR004839 (PFAM); IPR005861 (TIGRFAM); IPR015422 (G3DSA:3.90.1150.GENE3D); IPR015421 (G3DSA:3.40.640.GENE3D); PTHR42885 (PANTHER); PTHR42885:SF5 (PANTHER); IPR001917 (PROSITE_PATTERNS); IPR005861 (HAMAP); cd00609 (CDD); IPR015424 (SUPERFAMILY)	P:GO:0000105; P:GO:0009058; F:GO:0003824; F:GO:0004400; F:GO:0016740; F:GO:0030170	P:histidine biosynthetic process; P:biosynthetic process; F:catalytic activity; F:histidinol-phosphate transaminase activity; F:transferase activity; F:pyridoxal phosphate binding
WP_003085566.1	MULTISPECIES: GTPase Era [Pseudomonas]	40	11	26	11	34.5	434	11	0	Yes	1.01809	0.739181		-1.00567	0.876373		1.85459	1.26327e-06	Up	1.07364	0.13687		PA0771	era	GTP-binding protein Era	era	1.09144	0.551675	S	P:GO:0000028; P:GO:0046777; F:GO:0003924; F:GO:0005525; F:GO:0032550; F:GO:0043024; F:GO:0070181; C:GO:0005829; C:GO:0031234	P:ribosomal small subunit assembly; P:protein autophosphorylation; F:GTPase activity; F:GTP binding; F:purine ribonucleoside binding; F:ribosomal small subunit binding; F:small ribosomal subunit rRNA binding; C:cytosol; C:extrinsic component of cytoplasmic side of plasma membrane	EC:3.6.1	Acting on acid anhydrides	IPR006073 (PRINTS); IPR005662 (TIGRFAM); IPR015946 (G3DSA:3.30.300.GENE3D); IPR027417 (G3DSA:3.40.50.GENE3D); IPR006073 (PFAM); IPR004044 (PFAM); IPR005225 (TIGRFAM); PTHR42698:SF2 (PANTHER); IPR005662 (PANTHER); IPR030388 (PROSITE_PROFILES); IPR004044 (PROSITE_PROFILES); IPR005662 (HAMAP); IPR030388 (CDD); IPR009019 (SUPERFAMILY); IPR027417 (SUPERFAMILY)	F:GO:0003723; F:GO:0005525	F:RNA binding; F:GTP binding
WP_003095335.1	MULTISPECIES: magnesium-translocating P-type ATPase [Pseudomonas]	31	26	75	26	100	1956	26	0	Yes	2.05584	0.00585845	Up	-1.0563	0.79852		1.85279	0.0452606	Up	-10.1218	4.63246e-05	Lower	PA4825	mgtA	Mg(2+) transport ATPase, P-type 2	mgtA	-1.5333	0.229153	P	P:GO:1903830; F:GO:0005524; F:GO:0015444; F:GO:0016887; C:GO:0016021	P:magnesium ion transmembrane transport; F:ATP binding; F:P-type magnesium transporter activity; F:ATP hydrolysis activity; C:integral component of membrane	EC:7.2.2.14; EC:3.6.1	P-type Mg(2+) transporter; Acting on acid anhydrides	IPR006415 (PRINTS); G3DSA:2.70.150.10 (GENE3D); IPR006068 (PFAM); PF00122 (PFAM); IPR001757 (TIGRFAM); G3DSA:1.20.1110.10 (GENE3D); IPR004014 (PFAM); IPR023214 (G3DSA:3.40.50.GENE3D); PF00702 (PFAM); IPR006415 (TIGRFAM); IPR023299 (G3DSA:3.40.1110.GENE3D); IPR044492 (SFLD); SFLDS00003 (SFLD); mobidb-lite (MOBIDB_LITE); PTHR24093:SF128 (PANTHER); PTHR24093 (PANTHER); IPR018303 (PROSITE_PATTERNS); …	P:GO:0015693; F:GO:0000166; F:GO:0005215; F:GO:0005524; F:GO:0015444; F:GO:0016887; C:GO:0016021	P:magnesium ion transport; F:nucleotide binding; F:transporter activity; F:ATP binding; F:P-type magnesium transporter activity; F:ATP hydrolysis activity; C:integral component of membrane
WP_003087710.1	MULTISPECIES: YopB/SseC family type III secretion system translocon subunit [Pseudomonas]	12	6	11	6	40	154	6	0	Yes	4.34046	4.54653e-05	Up	-1.24938	0.0263956		1.85173	4.74158e-05	Up	1.8744	0.00769288	Higher	PA1708	popB	translocator protein PopB	popB	1.01338	0.931008	S	C:GO:0016021	C:integral component of membrane			Coil (COILS); Coil (COILS); IPR006972 (PFAM)	no GO terms	no GO terms
WP_003111384.1	MULTISPECIES: LacI family DNA-binding transcriptional regulator [Pseudomonas]	26	8	20	8	37.1	493	8	0	Yes	1.0115	0.795636		1.21857	0.00101979		1.85127	5.59892e-05	Up	1.08082	0.187408		PA2320	gntR	transcriptional regulator GntR	gntR	1.62286	0.0940044	K	P:GO:0006355; P:GO:0010906; F:GO:0000976; F:GO:0003700	P:regulation of transcription, DNA-templated; P:regulation of glucose metabolic process; F:transcription cis-regulatory region binding; F:DNA-binding transcription factor activity			IPR046335 (PFAM); IPR000843 (PFAM); G3DSA:3.40.50.2300 (GENE3D); IPR010982 (G3DSA:1.10.260.GENE3D); G3DSA:3.40.50.2300 (GENE3D); PTHR30146:SF2 (PANTHER); PTHR30146 (PANTHER); PS00356 (PROSITE_PATTERNS); IPR000843 (PROSITE_PROFILES); cd01575 (CDD); IPR000843 (CDD); IPR028082 (SUPERFAMILY); IPR010982 (SUPERFAMILY)	P:GO:0006355; F:GO:0003677	P:regulation of transcription, DNA-templated; F:DNA binding
WP_003099278.1	MULTISPECIES: aminoacyl-tRNA hydrolase [Pseudomonas]	38	5	12	5	20.8	336	5	0	Yes	1.02658	0.650506		-1.05332	0.483088		1.85069	0.000777229	Up	1.12541	0.171448		PA4672		peptidyl-tRNA hydrolase	PA4672	-1.05671	0.792259	J	P:GO:0006412; P:GO:0006515; F:GO:0004045; C:GO:0005737	P:translation; P:protein quality control for misfolded or incompletely synthesized proteins; F:aminoacyl-tRNA hydrolase activity; C:cytoplasm	EC:3.1.1.29; EC:3.1.1.1	Aminoacyl-tRNA hydrolase; Carboxylesterase	IPR001328 (PFAM); IPR036416 (G3DSA:3.40.50.GENE3D); IPR001328 (TIGRFAM); IPR001328 (PANTHER); PTHR17224:SF1 (PANTHER); IPR018171 (PROSITE_PATTERNS); IPR018171 (PROSITE_PATTERNS); IPR001328 (HAMAP); IPR001328 (CDD); IPR036416 (SUPERFAMILY)	F:GO:0004045	F:aminoacyl-tRNA hydrolase activity
WP_014604044.1	MULTISPECIES: PAS domain S-box protein [Pseudomonas]	17	12	17	12	82.8	487	12	0	Yes	1.15477	0.0109705		1.31209	0.000206618		1.84559	2.17144e-06	Up	-1.20976	0.0911915		PA4197	bfiS	BfiS	bfiS	1.05489	0.761668	T	P:GO:0000160; P:GO:0018106; F:GO:0000155; F:GO:0005515; F:GO:0005524	P:phosphorelay signal transduction system; P:peptidyl-histidine phosphorylation; F:phosphorelay sensor kinase activity; F:protein binding; F:ATP binding	EC:2.7.3; EC:2.7.13.3	Transferring phosphorus-containing groups; Histidine kinase	Coil (COILS); IPR004358 (PRINTS); IPR003594 (PFAM); G3DSA:1.10.287.130 (GENE3D); G3DSA:3.30.450.20 (GENE3D); G3DSA:3.30.450.20 (GENE3D); IPR036890 (G3DSA:3.30.565.GENE3D); IPR013655 (PFAM); IPR000014 (TIGRFAM); IPR003661 (PFAM); mobidb-lite (MOBIDB_LITE); PTHR43065:SF10 (PANTHER); PTHR43065 (PANTHER); IPR000014 (PROSITE_PROFILES); IPR005467 (PROSITE_PROFILES); IPR000014 (PROSITE_PROFILES); IPR000…	P:GO:0007165; P:GO:0016310; F:GO:0000155; F:GO:0005515; F:GO:0016772	P:signal transduction; P:phosphorylation; F:phosphorelay sensor kinase activity; F:protein binding; F:transferase activity, transferring phosphorus-containing groups
WP_034065012.1	aspartate kinase [Pseudomonas aeruginosa]	54	19	101	19	44.4	3048	19	0	Yes	-1.04229	0.678123		0.997131	0.933659		1.84549	0.000992355	Up	-2.03648	0.000300425	Lower	PA0904	lysC	aspartate kinase alpha and beta chain	lysC	1.5874	0.00596489	E	P:GO:0009088; P:GO:0009089; P:GO:0009090; P:GO:0016310; P:GO:0019877; F:GO:0004072; F:GO:0005524; C:GO:0005829; C:GO:0009570	P:threonine biosynthetic process; P:lysine biosynthetic process via diaminopimelate; P:homoserine biosynthetic process; P:phosphorylation; P:diaminopimelate biosynthetic process; F:aspartate kinase activity; F:ATP binding; C:cytosol; C:chloroplast stroma	EC:2.7.2.4	Aspartate kinase	IPR005260 (PIRSF); G3DSA:3.30.2130.10 (GENE3D); IPR001048 (PFAM); IPR036393 (G3DSA:3.40.1160.GENE3D); IPR002912 (PFAM); IPR001341 (TIGRFAM); IPR027795 (PFAM); IPR005260 (TIGRFAM); PTHR21499:SF3 (PANTHER); PTHR21499 (PANTHER); IPR018042 (PROSITE_PATTERNS); IPR002912 (PROSITE_PROFILES); cd04913 (CDD); IPR041740 (CDD); cd04923 (CDD); IPR045865 (SUPERFAMILY); IPR045865 (SUPERFAMILY); IPR036393 (SUPER…	P:GO:0008652; P:GO:0009089; F:GO:0004072	P:cellular amino acid biosynthetic process; P:lysine biosynthetic process via diaminopimelate; F:aspartate kinase activity
WP_003092638.1	MULTISPECIES: tRNA (guanosine(37)-N1)-methyltransferase TrmD [Pseudomonas]	21	6	11	6	28.4	216	6	0	Yes	1.02574	0.550544		1.25443	0.198407		1.8432	0.0171141	Up	-1.21698	0.0259949		PA3743	trmD	tRNA (guanine-N1)-methyltransferase	trmD	-1.22667	0.177529	J	P:GO:0002939; F:GO:0000287; F:GO:0042802; F:GO:0052906; C:GO:0005829	P:tRNA N1-guanine methylation; F:magnesium ion binding; F:identical protein binding; F:tRNA (guanine(37)-N(1))-methyltransferase activity; C:cytosol	EC:2.1.1.228	tRNA (guanine(37)-N(1))-methyltransferase	IPR016009 (PFAM); IPR002649 (TIGRFAM); IPR023148 (G3DSA:1.10.1270.GENE3D); IPR029026 (G3DSA:3.40.1280.GENE3D); IPR002649 (PIRSF); IPR002649 (PANTHER); IPR002649 (HAMAP); IPR002649 (CDD); IPR029028 (SUPERFAMILY)	P:GO:0008033; F:GO:0052906	P:tRNA processing; F:tRNA (guanine(37)-N(1))-methyltransferase activity
WP_003091582.1	MULTISPECIES: RluA family pseudouridine synthase [Pseudomonas]	14	3	5	3	24.3	74	3	0	Yes	1.21078	0.0358608		1.33776	0.00639353		1.84201	0.000901648	Up	-1.46696	0.00181956		PA3246	rluA	pseudouridine synthase RluA	rluA	-1.19862	0.146991	J	P:GO:0000455; P:GO:0031119; F:GO:0003723; F:GO:0106029	P:enzyme-directed rRNA pseudouridine synthesis; P:tRNA pseudouridine synthesis; F:RNA binding; F:tRNA pseudouridine synthase activity	EC:5.4.99.12; EC:5.4.99.45; EC:5.4.99.26; EC:5.4.99.25; EC:5.4.99.28; EC:5.4.99.27; EC:5.4.99.42; EC:5.4.99.44	tRNA pseudouridine(38-40) synthase; tRNA pseudouridine(38/39) synthase; tRNA pseudouridine(65) synthase; tRNA pseudouridine(55) synthase; tRNA pseudouridine(32) synthase; tRNA pseudouridine(13) synthase; tRNA pseudouridine(31) synthase; Mitochondrial tRNA pseudouridine(27/28) synthase	G3DSA:3.30.2350.10 (GENE3D); IPR006145 (PFAM); PTHR21600 (PANTHER); PTHR21600:SF56 (PANTHER); IPR006224 (PROSITE_PATTERNS); IPR006145 (CDD); IPR020103 (SUPERFAMILY)	P:GO:0001522; P:GO:0009451; F:GO:0003723; F:GO:0009982	P:pseudouridine synthesis; P:RNA modification; F:RNA binding; F:pseudouridine synthase activity
WP_003085275.1	MULTISPECIES: tyrosine--tRNA ligase [Pseudomonas]	36	13	45	13	44.1	1223	13	0	Yes	1.09934	0.0232685		1.19179	0.000496679		1.8396	2.14078e-07	Up	-2.00931	1.08001e-07	Lower	PA0668	tyrZ	tyrosyl-tRNA synthetase 2	tyrZ	-1.19037	0.0296033	J	P:GO:0006437; F:GO:0003723; F:GO:0004831; F:GO:0005524; C:GO:0005829	P:tyrosyl-tRNA aminoacylation; F:RNA binding; F:tyrosine-tRNA ligase activity; F:ATP binding; C:cytosol	EC:6.1.1.1	Tyrosine--tRNA ligase	IPR002307 (PRINTS); IPR002305 (PFAM); IPR036986 (G3DSA:3.10.290.GENE3D); IPR014729 (G3DSA:3.40.50.GENE3D); IPR002307 (TIGRFAM); G3DSA:1.10.240.10 (GENE3D); IPR024088 (PANTHER); IPR024108 (PTHR11766:PANTHER); IPR001412 (PROSITE_PATTERNS); PS50889 (PROSITE_PROFILES); IPR024108 (HAMAP); IPR002307 (CDD); SSF55174 (SUPERFAMILY); SSF52374 (SUPERFAMILY)	P:GO:0006418; P:GO:0006437; F:GO:0000166; F:GO:0003723; F:GO:0004812; F:GO:0004831; F:GO:0005524	P:tRNA aminoacylation for protein translation; P:tyrosyl-tRNA aminoacylation; F:nucleotide binding; F:RNA binding; F:aminoacyl-tRNA ligase activity; F:tyrosine-tRNA ligase activity; F:ATP binding
WP_003090879.1	MULTISPECIES: NADPH-dependent 7-cyano-7-deazaguanine reductase QueF [Pseudomonas]	32	7	14	7	30.8	549	7	0	Yes	1.1324	0.185659		1.01116	0.940505		1.83845	0.00052576	Up				PA2806		conserved hypothetical protein	PA2806	-1.30231	0.0263595	S	P:GO:0008616; F:GO:0033739; F:GO:0046857; C:GO:0005829	P:queuosine biosynthetic process; F:preQ1 synthase activity; F:oxidoreductase activity, acting on other nitrogenous compounds as donors, with NAD or NADP as acceptor; C:cytosol	EC:1.7.1.13; EC:1.6.6; EC:1.5.1	PreQ(1) synthase; Acting on NADH or NADPH; Acting on the CH-NH group of donors	IPR016428 (PIRSF); IPR029139 (PFAM); IPR029500 (PFAM); IPR043133 (G3DSA:3.30.1130.GENE3D); IPR016428 (TIGRFAM); IPR043133 (G3DSA:3.30.1130.GENE3D); PTHR34354 (PANTHER); IPR016428 (HAMAP); SSF55620 (SUPERFAMILY)	P:GO:0008616; F:GO:0033739; F:GO:0046857; C:GO:0005737	P:queuosine biosynthetic process; F:preQ1 synthase activity; F:oxidoreductase activity, acting on other nitrogenous compounds as donors, with NAD or NADP as acceptor; C:cytoplasm
WP_003092362.1	MULTISPECIES: cell division protein FtsB [Pseudomonas]	54	5	14	5	10.9	287	5	0	Yes	-1.01879	0.681496		1.01372	0.83989		1.83791	2.08092e-05	Up				PA3634		conserved hypothetical protein	PA3634	-1.72047	0.000377724	D	P:GO:0043093; F:GO:0042802; C:GO:0005887; C:GO:0030428; C:GO:0032153	P:FtsZ-dependent cytokinesis; F:identical protein binding; C:integral component of plasma membrane; C:cell septum; C:cell division site			Coil (COILS); IPR007060 (PFAM); IPR023081 (PANTHER); IPR023081 (HAMAP)	no GO terms	no GO terms
WP_003087974.1	MULTISPECIES: hypothetical protein [Pseudomonas]	10	3	6	3	60.8	227	3	0	Yes	1.14101	0.157161		1.05229	0.470909		1.83666	0.00149053	Up	-1.1416	0.086686		PA1822	fimL	hypothetical protein	fimL	-1.04712	0.446572	T	P:GO:0000160	P:phosphorelay signal transduction system			Coil (COILS); PTHR43395:SF8 (PANTHER); PTHR43395 (PANTHER); PTHR43395 (PANTHER); PTHR43395:SF8 (PANTHER); IPR036641 (SUPERFAMILY)	P:GO:0000160	P:phosphorelay signal transduction system
WP_003091667.1	MULTISPECIES: RNA polymerase-associated protein RapA [Pseudomonas]	27	22	63	22	106.6	1856	22	0	Yes	0.995833	0.876377		-1.10964	0.013639		1.83393	1.00498e-06	Up				PA3308	hepA	RNA helicase HepA	PA3308	-1.60644	0.00147223	K	P:GO:0010628; P:GO:0045893; F:GO:0001000; F:GO:0003677; F:GO:0004386; F:GO:0005524; F:GO:0016887; F:GO:0140658; C:GO:0005737	P:positive regulation of gene expression; P:positive regulation of transcription, DNA-templated; F:bacterial-type RNA polymerase core enzyme binding; F:DNA binding; F:helicase activity; F:ATP binding; F:ATP hydrolysis activity; F:ATP-dependent chromatin remodeler activity; C:cytoplasm	EC:3.6.1	Acting on acid anhydrides	Coil (COILS); G3DSA:2.30.30.930 (GENE3D); IPR000330 (PFAM); IPR040766 (PFAM); G3DSA:3.30.360.80 (GENE3D); IPR027417 (G3DSA:3.40.50.GENE3D); IPR022737 (PFAM); G3DSA:6.10.140.1500 (GENE3D); IPR038718 (G3DSA:3.40.50.GENE3D); G3DSA:6.10.140.2230 (GENE3D); G3DSA:2.30.30.140 (GENE3D); IPR040765 (PFAM); IPR001650 (PFAM); PTHR10799 (PANTHER); PTHR10799:SF971 (PANTHER); IPR001650 (PROSITE_PROFILES); IPR01…	P:GO:0006355; F:GO:0005524; F:GO:0016817; F:GO:0140658	P:regulation of transcription, DNA-templated; F:ATP binding; F:hydrolase activity, acting on acid anhydrides; F:ATP-dependent chromatin remodeler activity
WP_003094758.1	MULTISPECIES: Obg family GTPase CgtA [Pseudomonas]	16	6	19	6	44.3	480	6	0	Yes	1.18543	0.0329404		1.04036	0.589286		1.83338	3.90345e-06	Up	-1.25979	0.0234531		PA4566	obg	GTP-binding protein Obg	obg	1.01729	0.827698	S	P:GO:0007059; P:GO:0022611; P:GO:0022618; P:GO:0042255; P:GO:0090071; F:GO:0000287; F:GO:0003924; F:GO:0005525; F:GO:0019003; F:GO:0032550; F:GO:0043023; C:GO:0005829	P:chromosome segregation; P:dormancy process; P:ribonucleoprotein complex assembly; P:ribosome assembly; P:negative regulation of ribosome biogenesis; F:magnesium ion binding; F:GTPase activity; F:GTP binding; F:GDP binding; F:purine ribonucleoside binding; F:ribosomal large subunit binding; C:cytosol	EC:3.6.1	Acting on acid anhydrides	IPR006073 (PRINTS); IPR036726 (G3DSA:2.70.210.GENE3D); IPR006169 (PFAM); IPR027417 (G3DSA:3.40.50.GENE3D); IPR006073 (PFAM); IPR014100 (TIGRFAM); IPR014100 (PIRSF); mobidb-lite (MOBIDB_LITE); mobidb-lite (MOBIDB_LITE); mobidb-lite (MOBIDB_LITE); mobidb-lite (MOBIDB_LITE); PTHR11702:SF31 (PANTHER); IPR045086 (PANTHER); IPR006074 (PROSITE_PATTERNS); IPR006169 (PROSITE_PROFILES); IPR031167 (PROSITE_…	F:GO:0000287; F:GO:0003924; F:GO:0005525	F:magnesium ion binding; F:GTPase activity; F:GTP binding
WP_003094121.1	MULTISPECIES: UDP-N-acetylmuramate--L-alanine ligase [Pseudomonas]	22	9	27	9	51.9	839	9	0	Yes	1.03531	0.396356		1.31343	0.00031967		1.83254	1.3682e-05	Up	-1.18639	0.0412685		PA4411	murC	UDP-N-acetylmuramate--alanine ligase	murC	1.63148	1.86e-11	M	P:GO:0007049; P:GO:0008360; P:GO:0051301; P:GO:0071555; F:GO:0000287; F:GO:0005524; F:GO:0008763; C:GO:0005737; C:GO:0016021	P:cell cycle; P:regulation of cell shape; P:cell division; P:cell wall organization; F:magnesium ion binding; F:ATP binding; F:UDP-N-acetylmuramate-L-alanine ligase activity; C:cytoplasm; C:integral component of membrane	EC:6.3.2.8	UDP-N-acetylmuramate--L-alanine ligase	IPR004101 (PFAM); G3DSA:3.40.50.720 (GENE3D); IPR036565 (G3DSA:3.40.1190.GENE3D); IPR005758 (TIGRFAM); IPR036615 (G3DSA:3.90.190.GENE3D); IPR000713 (PFAM); IPR013221 (PFAM); PTHR43445 (PANTHER); PTHR43445:SF3 (PANTHER); IPR005758 (HAMAP); IPR036565 (SUPERFAMILY); IPR036615 (SUPERFAMILY); SSF51984 (SUPERFAMILY)	P:GO:0009058; F:GO:0005524; F:GO:0008763; F:GO:0016874	P:biosynthetic process; F:ATP binding; F:UDP-N-acetylmuramate-L-alanine ligase activity; F:ligase activity
WP_003093887.1	MULTISPECIES: formyltetrahydrofolate deformylase [Pseudomonas]	27	8	37	8	32.4	768	8	0	Yes	-1.04461	0.222581		1.11126	0.00915304		1.8278	1.26252e-06	Up	-1.06094	0.0649763		PA4314	purU1	formyltetrahydrofolate deformylase	purU1	1.04736	0.593761	F	P:GO:0006189; P:GO:0006730; F:GO:0008864; F:GO:0016742	P:'de novo' IMP biosynthetic process; P:one-carbon metabolic process; F:formyltetrahydrofolate deformylase activity; F:hydroxymethyl-, formyl- and related transferase activity	EC:3.5.1.10; EC:2.1.2	Formyltetrahydrofolate deformylase; Transferring one-carbon groups	IPR004810 (PRINTS); IPR002376 (PFAM); PIRSF036480 (PIRSF); IPR004810 (TIGRFAM); G3DSA:3.30.70.260 (GENE3D); G3DSA:3.40.50.170 (GENE3D); PTHR42706:SF1 (PANTHER); IPR004810 (PANTHER); IPR004810 (HAMAP); IPR041729 (CDD); IPR044074 (CDD); IPR036477 (SUPERFAMILY); IPR045865 (SUPERFAMILY)	P:GO:0006189; P:GO:0009058; F:GO:0008864; F:GO:0016742	P:'de novo' IMP biosynthetic process; P:biosynthetic process; F:formyltetrahydrofolate deformylase activity; F:hydroxymethyl-, formyl- and related transferase activity
WP_003094300.1	MULTISPECIES: tryptophan--tRNA ligase [Pseudomonas]	20	9	37	9	48.9	1051	9	0	Yes	1.00306	0.985617		1.04651	0.805652		1.82344	0.00179497	Up	-1.16034	0.0810225		PA4439	trpS	tryptophanyl-tRNA synthetase	trpS	1.04998	0.431997	J	P:GO:0006436; F:GO:0004830; F:GO:0005524; C:GO:0005737	P:tryptophanyl-tRNA aminoacylation; F:tryptophan-tRNA ligase activity; F:ATP binding; C:cytoplasm	EC:6.1.1.2	Tryptophan--tRNA ligase	Coil (COILS); IPR002306 (PRINTS); IPR002306 (TIGRFAM); G3DSA:1.10.240.10 (GENE3D); IPR002305 (PFAM); IPR014729 (G3DSA:3.40.50.GENE3D); PTHR43766:SF1 (PANTHER); PTHR43766 (PANTHER); IPR001412 (PROSITE_PATTERNS); IPR024109 (HAMAP); IPR002306 (CDD); SSF52374 (SUPERFAMILY); IPR036913 (SUPERFAMILY)	P:GO:0006418; P:GO:0006436; F:GO:0000166; F:GO:0004812; F:GO:0004830; F:GO:0005524	P:tRNA aminoacylation for protein translation; P:tryptophanyl-tRNA aminoacylation; F:nucleotide binding; F:aminoacyl-tRNA ligase activity; F:tryptophan-tRNA ligase activity; F:ATP binding
WP_003092483.1	MULTISPECIES: tRNA (adenosine(37)-N6)-threonylcarbamoyltransferase complex dimerization subunit type 1 TsaB [Pseudomonas]	27	6	14	6	24.1	395	6	0	Yes	1.04453	0.239685		1.11657	0.0218844		1.81925	4.3694e-06	Up	-1.15029	0.00703436		PA3685	yeaZ	YeaZ	PA3685	-1.55681	1.32e-05	O	P:GO:0002949; P:GO:0006508; F:GO:0008237; F:GO:0016740; F:GO:0042802; C:GO:0005618; C:GO:0005829	P:tRNA threonylcarbamoyladenosine modification; P:proteolysis; F:metallopeptidase activity; F:transferase activity; F:identical protein binding; C:cell wall; C:cytosol	EC:3.4; EC:2	Acting on peptide bonds (peptidases); Transferases	G3DSA:3.30.420.40 (GENE3D); G3DSA:3.30.420.40 (GENE3D); IPR022496 (TIGRFAM); IPR000905 (PFAM); IPR022496 (PTHR11735:PANTHER); IPR000905 (PANTHER); IPR043129 (SUPERFAMILY); IPR043129 (SUPERFAMILY)	P:GO:0002949	P:tRNA threonylcarbamoyladenosine modification
WP_003095196.1	MULTISPECIES: phosphoglucosamine mutase [Pseudomonas]	33	15	73	15	47.8	1708	15	0	Yes	1.11557	0.048032		1.58907	0.000305636	Up	1.81725	0.000118539	Up	1.00964	0.846665		PA4749	glmM	phosphoglucosamine mutase	glmM	1.63863	0.00375239	G	P:GO:0005975; P:GO:0006048; P:GO:0046777; F:GO:0000287; F:GO:0004614; F:GO:0004615; F:GO:0008966; C:GO:0005829	P:carbohydrate metabolic process; P:UDP-N-acetylglucosamine biosynthetic process; P:protein autophosphorylation; F:magnesium ion binding; F:phosphoglucomutase activity; F:phosphomannomutase activity; F:phosphoglucosamine mutase activity; C:cytosol	EC:5.4.2.2; EC:5.4.2.8; EC:5.4.2.10	Phosphoglucomutase (alpha-D-glucose-1,6-bisphosphate-dependent); Phosphomannomutase; Phosphoglucosamine mutase	IPR005841 (PRINTS); IPR005843 (PFAM); G3DSA:3.40.120.10 (GENE3D); IPR005845 (PFAM); IPR005844 (PFAM); IPR006352 (TIGRFAM); G3DSA:3.40.120.10 (GENE3D); G3DSA:3.40.120.10 (GENE3D); IPR005846 (PFAM); G3DSA:3.30.310.50 (GENE3D); PTHR42946 (PANTHER); PTHR42946:SF1 (PANTHER); IPR016066 (PROSITE_PATTERNS); IPR006352 (HAMAP); IPR006352 (CDD); IPR016055 (SUPERFAMILY); IPR036900 (SUPERFAMILY); IPR016055 (S…	P:GO:0005975; P:GO:0071704; F:GO:0000287; F:GO:0008966; F:GO:0016868	P:carbohydrate metabolic process; P:organic substance metabolic process; F:magnesium ion binding; F:phosphoglucosamine mutase activity; F:intramolecular transferase activity, phosphotransferases
WP_003084412.1	MULTISPECIES: thymidylate synthase [Pseudomonas]	13	4	14	4	30	181	4	0	Yes	1.08262	0.237654		1.07521	0.301698		1.81586	0.000938428	Up	-1.51315	0.00128434	Lower	PA0342	thyA	thymidylate synthase	thyA	-1.27069	6.24e-06	F	P:GO:0006231; P:GO:0006235; P:GO:0032259; F:GO:0004799; C:GO:0005829	P:dTMP biosynthetic process; P:dTTP biosynthetic process; P:methylation; F:thymidylate synthase activity; C:cytosol	EC:2.1.1.45	Thymidylate synthase	IPR000398 (PRINTS); IPR000398 (TIGRFAM); IPR036926 (G3DSA:3.30.572.GENE3D); IPR023451 (PFAM); PTHR11548:SF9 (PANTHER); IPR045097 (PANTHER); IPR020940 (PROSITE_PATTERNS); IPR000398 (HAMAP); IPR023451 (CDD); IPR036926 (SUPERFAMILY)	P:GO:0006231; F:GO:0004799; F:GO:0016741	P:dTMP biosynthetic process; F:thymidylate synthase activity; F:transferase activity, transferring one-carbon groups
WP_149127236.1	16S rRNA (cytosine(967)-C(5))-methyltransferase RsmB [Pseudomonas aeruginosa]	24	9	21	9	47	590	9	0	Yes	1.27906	0.00492783		1.36488	0.0254917		1.81472	0.000406073	Up				PA0017		conserved hypothetical protein	PA0017	1.10666	0.33502	J	P:GO:0006355; P:GO:0070475; F:GO:0003723; F:GO:0009383; C:GO:0005829	P:regulation of transcription, DNA-templated; P:rRNA base methylation; F:RNA binding; F:rRNA (cytosine-C5-)-methyltransferase activity; C:cytosol	EC:2.1.1	Transferring one-carbon groups	IPR023267 (PRINTS); G3DSA:1.10.287.730 (GENE3D); IPR001678 (PFAM); G3DSA:3.40.50.150 (GENE3D); IPR004573 (TIGRFAM); G3DSA:3.30.70.1170 (GENE3D); IPR035926 (G3DSA:1.10.940.GENE3D); IPR006027 (PFAM); PTHR22807:SF63 (PANTHER); IPR023267 (PANTHER); IPR018314 (PROSITE_PATTERNS); IPR001678 (PROSITE_PROFILES); cd02440 (CDD); IPR035926 (SUPERFAMILY); IPR029063 (SUPERFAMILY)	P:GO:0001510; P:GO:0006355; P:GO:0006364; F:GO:0003723; F:GO:0008168; F:GO:0008649	P:RNA methylation; P:regulation of transcription, DNA-templated; P:rRNA processing; F:RNA binding; F:methyltransferase activity; F:rRNA methyltransferase activity
WP_034085482.1	EAL domain-containing protein [Pseudomonas aeruginosa]	14	7	16	7	86.3	412	7	0	Yes	1.30415	0.195168		1.25218	0.00784907		1.80978	4.62589e-05	Up	-1.5105	0.0152888	Lower	PA0285		putative phosphodiesterase	PA0285	1.06718	0.324576	T	P:GO:0006355; F:GO:0005515; C:GO:0016021	P:regulation of transcription, DNA-templated; F:protein binding; C:integral component of membrane			IPR000160 (TIGRFAM); IPR013655 (PFAM); IPR000014 (TIGRFAM); IPR001633 (PFAM); IPR013767 (PFAM); IPR000160 (PFAM); IPR043128 (G3DSA:3.30.70.GENE3D); G3DSA:3.30.450.20 (GENE3D); IPR035919 (G3DSA:3.20.20.GENE3D); G3DSA:3.30.450.20 (GENE3D); PTHR44757 (PANTHER); PTHR44757:SF2 (PANTHER); PTHR44757:SF2 (PANTHER); IPR000160 (PROSITE_PROFILES); IPR001633 (PROSITE_PROFILES); IPR000014 (PROSITE_PROFILES); …	P:GO:0006355; F:GO:0005515	P:regulation of transcription, DNA-templated; F:protein binding
WP_003096798.1	MULTISPECIES: 5-(carboxyamino)imidazole ribonucleotide synthase [Pseudomonas]	11	4	15	4	38.5	414	4	0	Yes	1.11593	0.0864818		1.13745	0.0663578		1.80843	3.36849e-05	Up	-1.34625	0.00169032		PA5425	purK	phosphoribosylaminoimidazole carboxylase	purK	-1.23997	0.0804674	F	P:GO:0006189; F:GO:0004638; F:GO:0005524; F:GO:0034028; F:GO:0046872; C:GO:0005829; C:GO:0005886	P:'de novo' IMP biosynthetic process; F:phosphoribosylaminoimidazole carboxylase activity; F:ATP binding; F:5-(carboxyamino)imidazole ribonucleotide synthase activity; F:metal ion binding; C:cytosol; C:plasma membrane	EC:6.3.4.18; EC:4.1.1.21	5-(carboxyamino)imidazole ribonucleotide synthase; Phosphoribosylaminoimidazole carboxylase	Coil (COILS); IPR040686 (PFAM); IPR003135 (PFAM); G3DSA:3.30.470.20 (GENE3D); G3DSA:3.40.50.20 (GENE3D); IPR013815 (G3DSA:3.30.1490.GENE3D); IPR005875 (TIGRFAM); PTHR11609 (PANTHER); IPR005875 (HAMAP); IPR011761 (PROSITE_PROFILES); IPR011054 (SUPERFAMILY); IPR016185 (SUPERFAMILY); SSF56059 (SUPERFAMILY)	P:GO:0006189; F:GO:0004638; F:GO:0005524; F:GO:0046872	P:'de novo' IMP biosynthetic process; F:phosphoribosylaminoimidazole carboxylase activity; F:ATP binding; F:metal ion binding
WP_003094920.1	MULTISPECIES: class I SAM-dependent methyltransferase [Pseudomonas]	24	6	16	6	35.9	580	6	0	Yes	1.06122	0.074529		1.2845	0.000108044		1.80679	2.35869e-06	Up	-1.10014	0.0105466		PA4627		conserved hypothetical protein	PA4627	-1.38702	0.000623058	J	P:GO:0070475; F:GO:0003676; F:GO:0052914; C:GO:0005829	P:rRNA base methylation; F:nucleic acid binding; F:16S rRNA (guanine(1207)-N(2))-methyltransferase activity; C:cytosol	EC:2.1.1.172; EC:2.1.1.52	16S rRNA (guanine(1207)-N(2))-methyltransferase; Transferring one-carbon groups	IPR007848 (PFAM); IPR013675 (PFAM); G3DSA:3.40.50.150 (GENE3D); G3DSA:3.40.50.150 (GENE3D); PTHR47816 (PANTHER); PTHR47816:SF4 (PANTHER); IPR002052 (PROSITE_PATTERNS); IPR023543 (HAMAP); cd02440 (CDD); IPR029063 (SUPERFAMILY)	P:GO:0006364; P:GO:0032259; F:GO:0003676; F:GO:0008168; F:GO:0008649; F:GO:0008990	P:rRNA processing; P:methylation; F:nucleic acid binding; F:methyltransferase activity; F:rRNA methyltransferase activity; F:rRNA (guanine-N2-)-methyltransferase activity
WP_003094407.1	MULTISPECIES: DUF2135 domain-containing protein [Pseudomonas]	50	10	25	10	28.1	565	10	0	Yes	-1.03149	0.422151		1.0604	0.124771		1.80571	3.77182e-05	Up	1.46564	0.00357792		PA4487	magF	MagF	PA4487	2.17348	4.73e-18	S					IPR019220 (PFAM); G3DSA:2.60.120.380 (GENE3D); IPR012039 (PIRSF)	no GO terms	no GO terms
WP_003094686.1	MULTISPECIES: 23S rRNA pseudouridine(1911/1915/1917) synthase RluD [Pseudomonas]	27	8	18	8	35.6	409	8	0	Yes	-1.05551	0.15282		-1.07082	0.420995		1.80319	9.31793e-05	Up	-1.15564	0.242081		PA4544	rluD	pseudouridine synthase	rluD	-1.37604	0.000308271	J	P:GO:0000027; P:GO:0000455; F:GO:0003723; F:GO:0120159; C:GO:0005829	P:ribosomal large subunit assembly; P:enzyme-directed rRNA pseudouridine synthesis; F:RNA binding; F:rRNA pseudouridine synthase activity; C:cytosol	EC:5.4.99.24; EC:5.4.99.23; EC:5.4.99.19; EC:5.4.99.29; EC:5.4.99.20; EC:5.4.99.22; EC:5.4.99.21; EC:5.4.99.43	23S rRNA pseudouridine(955/2504/2580) synthase; 23S rRNA pseudouridine(1911/1915/1917) synthase; 16S rRNA pseudouridine(516) synthase; 23S rRNA pseudouridine(746) synthase; 23S rRNA pseudouridine(2457) synthase; 23S rRNA pseudouridine(2605) synthase; 23S rRNA pseudouridine(2604) synthase; 21S rRNA pseudouridine(2819) synthase	G3DSA:3.30.2350.10 (GENE3D); IPR036986 (G3DSA:3.10.290.GENE3D); IPR006225 (TIGRFAM); IPR002942 (PFAM); IPR006145 (PFAM); PTHR21600 (PANTHER); PTHR21600:SF57 (PANTHER); IPR006224 (PROSITE_PATTERNS); PS50889 (PROSITE_PROFILES); IPR002942 (CDD); IPR006145 (CDD); SSF55174 (SUPERFAMILY); IPR020103 (SUPERFAMILY)	P:GO:0001522; P:GO:0009451; F:GO:0003723; F:GO:0009982	P:pseudouridine synthesis; P:RNA modification; F:RNA binding; F:pseudouridine synthase activity
WP_003128898.1	MULTISPECIES: sensor domain-containing diguanylate cyclase [Pseudomonas]	6	2	4	2	44.1	75	2	0	Yes	1.15895	0.183887		1.21634	0.102303		1.8023	0.00226498	Up	1.93948	0.0304437	Higher	PA0338		hypothetical protein	PA0338	-1.00999	0.887452	T	F:GO:0005515	F:protein binding			Coil (COILS); IPR043128 (G3DSA:3.30.70.GENE3D); IPR000160 (TIGRFAM); IPR000160 (PFAM); IPR013655 (PFAM); G3DSA:3.30.450.20 (GENE3D); IPR000014 (TIGRFAM); PTHR45138 (PANTHER); PTHR45138:SF9 (PANTHER); IPR000014 (PROSITE_PROFILES); IPR000160 (PROSITE_PROFILES); IPR000700 (PROSITE_PROFILES); IPR000160 (CDD); IPR000014 (CDD); IPR035965 (SUPERFAMILY); IPR029787 (SUPERFAMILY)	F:GO:0005515	F:protein binding
WP_003092370.1	MULTISPECIES: alanine:cation symporter family protein [Pseudomonas]	8	4	19	4	50.3	358	4	0	Yes	-1.12304	0.0179261		-1.06616	0.107686		1.7978	1.16887e-05	Up	-1.44121	0.000850564		PA3641		probable amino acid permease	PA3641	-2.21202	0.000328274	U	P:GO:0006814; P:GO:0032328; P:GO:0055085; F:GO:0015655; C:GO:0005886; C:GO:0016021	P:sodium ion transport; P:alanine transport; P:transmembrane transport; F:alanine:sodium symporter activity; C:plasma membrane; C:integral component of membrane	EC:7	Translocases	IPR001463 (PRINTS); G3DSA:1.20.1740.10 (GENE3D); IPR001463 (PFAM); IPR001463 (TIGRFAM); IPR001463 (PANTHER); PTHR30330:SF1 (PANTHER)	P:GO:0006814; P:GO:0032328; F:GO:0015655; C:GO:0016020	P:sodium ion transport; P:alanine transport; F:alanine:sodium symporter activity; C:membrane
WP_003091020.1	MULTISPECIES: ABC transporter substrate-binding protein [Pseudomonas]	24	6	9	6	35.3	187	6	0	Yes	1.27368	0.0118488		-1.16373	0.008331		1.79759	3.62667e-05	Up	-2.08238	0.000769016	Lower	PA2913		hypothetical protein	PA2913	1.13289	0.386584	P					G3DSA:3.40.50.1980 (GENE3D); IPR002491 (PFAM); G3DSA:3.40.50.1980 (GENE3D); PTHR30535:SF7 (PANTHER); PTHR30535 (PANTHER); PS51257 (PROSITE_PROFILES); IPR002491 (PROSITE_PROFILES); cd01148 (CDD); SSF53807 (SUPERFAMILY)	no GO terms	no GO terms
WP_003089797.1	MULTISPECIES: response regulator [Pseudomonas]	35	7	15	7	24.8	526	7	0	Yes	-1.06657	0.308476		1.25318	0.014773		1.79434	0.000155723	Up	2.91512	0.000144756	Higher	PA2479		probable two-component response regulator	PA2479	-1.18857	0.154944	T	P:GO:0000160; P:GO:0045893; F:GO:0000156; F:GO:0000976; F:GO:0001216; C:GO:0005829; C:GO:0032993	P:phosphorelay signal transduction system; P:positive regulation of transcription, DNA-templated; F:phosphorelay response regulator activity; F:transcription cis-regulatory region binding; F:DNA-binding transcription activator activity; C:cytosol; C:protein-DNA complex			IPR036388 (G3DSA:1.10.10.GENE3D); IPR001867 (PFAM); G3DSA:6.10.250.690 (GENE3D); G3DSA:3.40.50.2300 (GENE3D); IPR001789 (PFAM); IPR039420 (PANTHER); PTHR48111:SF35 (PANTHER); IPR001867 (PROSITE_PROFILES); IPR001789 (PROSITE_PROFILES); IPR001867 (CDD); IPR011006 (SUPERFAMILY)	P:GO:0000160; P:GO:0006355; F:GO:0003677	P:phosphorelay signal transduction system; P:regulation of transcription, DNA-templated; F:DNA binding
WP_003084970.1	MULTISPECIES: NAD(P)/FAD-dependent oxidoreductase [Pseudomonas]	13	5	9	5	42.6	98	5	0	Yes	1.06939	0.506153		1.11483	0.336471		1.79429	0.0317106	Up	-1.45826	0.265472		PA0559		conserved hypothetical protein	PA0559	-1.2052	0.0284016	S	C:GO:0005829; C:GO:0016021	C:cytosol; C:integral component of membrane			PR00411 (PRINTS); PR00368 (PRINTS); IPR004792 (TIGRFAM); G3DSA:2.40.30.10 (GENE3D); PF03486 (PFAM); IPR023166 (G3DSA:1.10.8.GENE3D); IPR036188 (G3DSA:3.50.50.GENE3D); IPR004792 (PANTHER); PTHR42887:SF2 (PANTHER); IPR036188 (SUPERFAMILY); SSF160996 (SUPERFAMILY)	no GO terms	no GO terms
WP_023092222.1	MULTISPECIES: D-glycero-beta-D-manno-heptose 1,7-bisphosphate 7-phosphatase [Pseudomonas]	22	3	4	3	19.1	218	3	0	Yes	1.23479	0.0881563		-1.34941	0.0414424		1.78675	0.00262573	Up	1.40319	0.0328084		PA0006		conserved hypothetical protein	PA0006	1.0058	0.964713	G	P:GO:0009244; P:GO:0016311; P:GO:0097171; F:GO:0000287; F:GO:0008270; F:GO:0034200; C:GO:0005737	P:lipopolysaccharide core region biosynthetic process; P:dephosphorylation; P:ADP-L-glycero-beta-D-manno-heptose biosynthetic process; F:magnesium ion binding; F:zinc ion binding; F:D,D-heptose 1,7-bisphosphate phosphatase activity; C:cytoplasm	EC:3.1.3	Acting on ester bonds	PF13242 (PFAM); IPR023214 (G3DSA:3.40.50.GENE3D); IPR006549 (TIGRFAM); IPR004446 (PIRSF); IPR006543 (TIGRFAM); IPR004446 (PANTHER); cd07503 (CDD); IPR036412 (SUPERFAMILY)	P:GO:0005975; F:GO:0016791	P:carbohydrate metabolic process; F:phosphatase activity
WP_014603663.1	MULTISPECIES: oxidoreductase [Pseudomonas]	24	7	18	7	34.7	501	7	0	Yes	-1.17543	0.252393		-1.13267	0.377487		1.78266	0.003747	Up	1.91865	0.00222028	Higher	PA1137		probable oxidoreductase	PA1137	1.56689	0.253485	C	F:GO:0016491	F:oxidoreductase activity	EC:1	Oxidoreductases	G3DSA:3.90.180.10 (GENE3D); IPR014189 (TIGRFAM); PF13602 (PFAM); IPR013154 (PFAM); G3DSA:3.40.50.720 (GENE3D); PTHR48106 (PANTHER); PTHR48106:SF8 (PANTHER); IPR014189 (CDD); IPR036291 (SUPERFAMILY); IPR011032 (SUPERFAMILY)	no GO terms	no GO terms
WP_003089414.1	MULTISPECIES: permease [Pseudomonas]	7	3	8	3	47.3	204	3	0	Yes	1.36583	0.296149		-1.31246	0.192397		1.7805	0.143139		2.12787	0.0183494	Higher	PA2322	gntP	GntP	PA2322	1.52206	0.0514168	EG	P:GO:0035429; P:GO:0046177; F:GO:0015128; C:GO:0005887	P:gluconate transmembrane transport; P:D-gluconate catabolic process; F:gluconate transmembrane transporter activity; C:integral component of plasma membrane	EC:7	Translocases	IPR003474 (PFAM); IPR003474 (TIGRFAM); IPR003474 (PIRSF); IPR003474 (PANTHER); PTHR30354:SF22 (PANTHER)	P:GO:0035429; F:GO:0015128; C:GO:0016020	P:gluconate transmembrane transport; F:gluconate transmembrane transporter activity; C:membrane
WP_003094932.1	MULTISPECIES: M48 family metallopeptidase [Pseudomonas]	35	7	28	7	29.1	1106	7	0	Yes	1.01303	0.889811		-1.49183	0.0573344		1.77209	0.0486949	Up	-1.02851	0.712816		PA4632		putative Zn-dependent peptidase	PA4632	1.27097	0.0653927	M	P:GO:0006508; F:GO:0004222	P:proteolysis; F:metalloendopeptidase activity	EC:3.4.24	Acting on peptide bonds (peptidases)	IPR001915 (PFAM); G3DSA:3.30.2010.10 (GENE3D); PTHR22726 (PANTHER); PTHR22726:SF1 (PANTHER); PS51257 (PROSITE_PROFILES); cd07331 (CDD)	P:GO:0006508; F:GO:0004222	P:proteolysis; F:metalloendopeptidase activity
WP_034085211.1	TetR family transcriptional regulator [Pseudomonas aeruginosa]	31	6	14	6	23.7	510	6	0	Yes	1.27309	0.00351256		1.23558	0.00351369		1.77144	3.84901e-05	Up	-1.12963	0.419754		PA2020	mexZ	MexZ	PA2020	1.15969	0.273242	K	P:GO:0032410; P:GO:0034763; P:GO:0045892; F:GO:0000976; F:GO:0001217; C:GO:0032993	P:negative regulation of transporter activity; P:negative regulation of transmembrane transport; P:negative regulation of transcription, DNA-templated; F:transcription cis-regulatory region binding; F:DNA-binding transcription repressor activity; C:protein-DNA complex			IPR001647 (PRINTS); IPR001647 (PFAM); G3DSA:1.10.357.10 (GENE3D); IPR013572 (PFAM); PTHR30055 (PANTHER); PTHR30055:SF173 (PANTHER); IPR001647 (PROSITE_PROFILES); IPR036271 (SUPERFAMILY); IPR009057 (SUPERFAMILY)	F:GO:0003677	F:DNA binding
WP_003095406.1	MULTISPECIES: bifunctional phosphoribosylaminoimidazolecarboxamide formyltransferase/IMP cyclohydrolase [Pseudomonas]	47	21	76	21	57.6	2420	21	0	Yes	-1.0091	0.94646		1.13913	0.227519		1.76618	0.00116743	Up	1.00681	0.990062		PA4854	purH	phosphoribosylaminoimidazolecarboxamide formyltransferase	purH	-1.24108	0.134377	F	P:GO:0006189; F:GO:0003937; F:GO:0004643; C:GO:0005829	P:'de novo' IMP biosynthetic process; F:IMP cyclohydrolase activity; F:phosphoribosylaminoimidazolecarboxamide formyltransferase activity; C:cytosol	EC:3.5.4.10; EC:2.1.2.3	IMP cyclohydrolase; Phosphoribosylaminoimidazolecarboxamide formyltransferase	IPR002695 (PIRSF); IPR024051 (G3DSA:3.40.140.GENE3D); IPR011607 (PFAM); IPR002695 (PFAM); IPR036914 (G3DSA:3.40.50.GENE3D); IPR002695 (TIGRFAM); IPR024051 (G3DSA:3.40.140.GENE3D); IPR002695 (PANTHER); PTHR11692:SF0 (PANTHER); IPR002695 (HAMAP); IPR011607 (PROSITE_PROFILES); cd01421 (CDD); IPR036914 (SUPERFAMILY); IPR016193 (SUPERFAMILY)	P:GO:0006164; F:GO:0003824; F:GO:0003937; F:GO:0004643	P:purine nucleotide biosynthetic process; F:catalytic activity; F:IMP cyclohydrolase activity; F:phosphoribosylaminoimidazolecarboxamide formyltransferase activity
WP_003091019.1	MULTISPECIES: ABC transporter ATP-binding protein [Pseudomonas]	8	2	3	2	28.4	81	2	0	Yes	1.1396	0.0662706		1.48514	0.000833456		1.7638	3.89607e-05	Up	-1.30679	0.00179448		PA2912		probable ATP-binding component of ABC transporter	PA2912	-1.03649	0.80387	HP	F:GO:0005524; F:GO:0016887	F:ATP binding; F:ATP hydrolysis activity	EC:3.6.1	Acting on acid anhydrides	IPR003439 (PFAM); IPR027417 (G3DSA:3.40.50.GENE3D); PTHR42794 (PANTHER); PTHR42794:SF2 (PANTHER); IPR017871 (PROSITE_PATTERNS); IPR003439 (PROSITE_PROFILES); cd03214 (CDD); IPR027417 (SUPERFAMILY)	F:GO:0005524	F:ATP binding
WP_003104386.1	MULTISPECIES: succinate dehydrogenase, hydrophobic membrane anchor protein [Pseudomonas]	16	3	17	3	13.7	303	3	0	Yes	-1.03122	0.711031		1.18595	0.404447		1.76292	0.000270404	Up	-1.26964	0.058956		PA1582	sdhD	succinate dehydrogenase (D subunit)	sdhD	-1.13764	0.408752	C	P:GO:0006099; P:GO:0017004; P:GO:0022900; F:GO:0000104; F:GO:0009055; F:GO:0020037; F:GO:0046872; C:GO:0005886; C:GO:0016021	P:tricarboxylic acid cycle; P:cytochrome complex assembly; P:electron transport chain; F:succinate dehydrogenase activity; F:electron transfer activity; F:heme binding; F:metal ion binding; C:plasma membrane; C:integral component of membrane	EC:1.3	Acting on the CH-CH group of donors	IPR000701 (PFAM); IPR014312 (TIGRFAM); IPR014312 (PIRSF); IPR034804 (G3DSA:1.20.1300.GENE3D); IPR014312 (PANTHER); cd03494 (CDD); IPR034804 (SUPERFAMILY)	P:GO:0006099; F:GO:0000104; F:GO:0016627; F:GO:0020037; C:GO:0016020; C:GO:0016021	P:tricarboxylic acid cycle; F:succinate dehydrogenase activity; F:oxidoreductase activity, acting on the CH-CH group of donors; F:heme binding; C:membrane; C:integral component of membrane
WP_003089145.1	MULTISPECIES: hypothetical protein [Pseudomonas]	19	3	7	3	19.2	280	3	0	Yes	1.29704	0.0298703		-1.16558	0.158576		1.7608	0.00130409	Up															no IPS match	no IPS match	no IPS match
WP_003096880.1	MULTISPECIES: glycosyltransferase family 4 protein [Pseudomonas]	5	2	4	2	42	77	2	0	Yes	1.05684	0.357686		1.45008	0.00182412		1.75653	0.0012482	Up	-5.29954	1.04913e-05	Lower	PA5448	wbpY	glycosyltransferase WbpY	wbpY	-1.08407	0.412169	M	P:GO:0009243; F:GO:0016757	P:O antigen biosynthetic process; F:glycosyltransferase activity	EC:2.4	Glycosyltransferases	G3DSA:3.40.50.2000 (GENE3D); G3DSA:3.40.50.2000 (GENE3D); IPR028098 (PFAM); IPR001296 (PFAM); PTHR46401:SF2 (PANTHER); PTHR46401 (PANTHER); cd03809 (CDD); SSF53756 (SUPERFAMILY)	F:GO:0016757	F:glycosyltransferase activity
WP_003136959.1	MULTISPECIES: ABC transporter ATP-binding protein [Pseudomonas]	30	6	12	6	25.9	454	6	0	Yes	1.00637	0.876888		-1.0365	0.61764		1.75637	0.000235819	Up	3.8933	0.000679287	Higher	PA0073	tagT1	TagT1	PA0073	2.21539	2.45e-05	V	P:GO:0055085; F:GO:0005524; F:GO:0016887; F:GO:0022857; C:GO:0005886	P:transmembrane transport; F:ATP binding; F:ATP hydrolysis activity; F:transmembrane transporter activity; C:plasma membrane	EC:3.6.1; EC:7	Acting on acid anhydrides; Translocases	IPR027417 (G3DSA:3.40.50.GENE3D); IPR003439 (PFAM); PTHR24220 (PANTHER); IPR017871 (PROSITE_PATTERNS); IPR003439 (PROSITE_PROFILES); IPR027417 (SUPERFAMILY)	F:GO:0005524	F:ATP binding
WP_009314490.1	MULTISPECIES: ATP-binding cassette domain-containing protein [Pseudomonas]	35	21	49	21	70.8	1227	21	0	Yes	1.03255	0.147273		1.08041	0.0037001		1.7559	3.97005e-08	Up	-1.30855	0.0162708		PA5252		probable ATP-binding component of ABC transporter	PA5252	-1.2446	0.0389501	S	F:GO:0005524; F:GO:0016887	F:ATP binding; F:ATP hydrolysis activity	EC:3.6.1	Acting on acid anhydrides	Coil (COILS); Coil (COILS); IPR003439 (PFAM); IPR027417 (G3DSA:3.40.50.GENE3D); IPR027417 (G3DSA:3.40.50.GENE3D); G3DSA:1.10.287.1490 (GENE3D); IPR032781 (PFAM); IPR003439 (PFAM); PTHR19211 (PANTHER); PTHR19211:SF99 (PANTHER); IPR017871 (PROSITE_PATTERNS); IPR017871 (PROSITE_PATTERNS); IPR003439 (PROSITE_PROFILES); IPR003439 (PROSITE_PROFILES); cd03221 (CDD); cd03221 (CDD); IPR027417 (SUPERFAMILY…	F:GO:0005524	F:ATP binding
WP_023098701.1	MULTISPECIES: threonine-phosphate decarboxylase [Pseudomonas]	8	2	5	2	36.6	178	2	0	Yes	1.05158	0.585082		1.22463	0.0130768		1.75499	0.000112285	Up	-1.73211	0.0041388	Lower	PA1276	cobC	cobalamin biosynthetic protein CobC	cobC	1.6872	0.0241968	E	P:GO:0009236; F:GO:0030170; F:GO:0048472	P:cobalamin biosynthetic process; F:pyridoxal phosphate binding; F:threonine-phosphate decarboxylase activity	EC:4.1.1.81	Threonine-phosphate decarboxylase	Coil (COILS); IPR004839 (PFAM); IPR005860 (TIGRFAM); IPR015421 (G3DSA:3.40.640.GENE3D); IPR015422 (G3DSA:3.90.1150.GENE3D); PTHR42885:SF1 (PANTHER); PTHR42885 (PANTHER); IPR004838 (PROSITE_PATTERNS); cd00609 (CDD); IPR015424 (SUPERFAMILY)	P:GO:0009058; P:GO:0009236; F:GO:0003824; F:GO:0030170	P:biosynthetic process; P:cobalamin biosynthetic process; F:catalytic activity; F:pyridoxal phosphate binding
WP_003093423.1	class C beta-lactamase PDC-35 [Pseudomonas aeruginosa]	42	14	75	14	43.5	2120	14	0	Yes	-1.23478	0.190064		-1.3271	0.109771		1.75352	0.0138593	Up				PA4110	ampC	beta-lactamase precursor	ampC	53.6548	3.54e-46	V	P:GO:0017001; P:GO:0046677; F:GO:0008800; C:GO:0030288	P:antibiotic catabolic process; P:response to antibiotic; F:beta-lactamase activity; C:outer membrane-bounded periplasmic space	EC:3.5.2.6	Beta-lactamase	IPR001466 (PFAM); IPR012338 (G3DSA:3.40.710.GENE3D); PTHR43645:SF1 (PANTHER); PTHR43645 (PANTHER); IPR001586 (PROSITE_PATTERNS); IPR012338 (SUPERFAMILY)	P:GO:0017001; F:GO:0008800; C:GO:0030288	P:antibiotic catabolic process; F:beta-lactamase activity; C:outer membrane-bounded periplasmic space
WP_003087524.1	MULTISPECIES: potassium-transporting ATPase subunit KdpA [Pseudomonas]	3	2	6	2	59.9	119	2	0	Yes	-1.12372	0.606049		1.10808	0.545188		1.75253	0.0244132	Up	-11.1747	9.5548e-05	Lower	PA1633	kdpA	potassium-transporting ATPase, A chain	kdpA	-1.51282	0.0698464	P	P:GO:0071805; F:GO:0008556; F:GO:0016787; F:GO:0030955; C:GO:0005618; C:GO:0005887	P:potassium ion transmembrane transport; F:P-type potassium transmembrane transporter activity; F:hydrolase activity; F:potassium ion binding; C:cell wall; C:integral component of plasma membrane	EC:3; EC:7.2.2.6	Hydrolases; P-type K(+) transporter	IPR004623 (PIRSF); IPR004623 (TIGRFAM); IPR004623 (PFAM); IPR004623 (PANTHER); IPR004623 (HAMAP)	P:GO:0006813; F:GO:0008556	P:potassium ion transport; F:P-type potassium transmembrane transporter activity
WP_003120916.1	MULTISPECIES: lipopolysaccharide transport periplasmic protein LptA [Pseudomonas]	53	10	48	10	19.1	1194	10	0	Yes	-1.27058	0.0459497		-1.49434	0.00581409		1.74939	0.000894426	Up	1.24581	0.0476822		PA4460	lptH	LptH	PA4460	1.14837	0.127865	S	P:GO:0015921; P:GO:0043165; P:GO:0046836; F:GO:0001530; F:GO:0017089; F:GO:0042802; C:GO:0009279; C:GO:0030288	P:lipopolysaccharide export; P:Gram-negative-bacterium-type cell outer membrane assembly; P:glycolipid transport; F:lipopolysaccharide binding; F:glycolipid transfer activity; F:identical protein binding; C:cell outer membrane; C:outer membrane-bounded periplasmic space	EC:7	Translocases	G3DSA:2.60.450.10 (GENE3D); IPR005653 (PFAM); IPR014340 (TIGRFAM); PTHR36504 (PANTHER); IPR014340 (HAMAP)	P:GO:0015920; F:GO:0001530; C:GO:0042597	P:lipopolysaccharide transport; F:lipopolysaccharide binding; C:periplasmic space
WP_003134739.1	MULTISPECIES: 16S rRNA (cytidine(1402)-2'-O)-methyltransferase [Pseudomonas]	23	6	18	6	30.6	689	6	0	Yes	1.07611	0.232075		1.17586	0.0299227		1.74833	0.000510547	Up	-1.1319	0.27946		PA4422		conserved hypothetical protein	PA4422	-1.01022	0.823836	H	P:GO:0000453; F:GO:0070677; C:GO:0005737; C:GO:0005886	P:enzyme-directed rRNA 2'-O-methylation; F:rRNA (cytosine-2'-O-)-methyltransferase activity; C:cytoplasm; C:plasma membrane	EC:2.1.1	Transferring one-carbon groups	IPR000878 (PFAM); IPR014776 (G3DSA:3.30.950.GENE3D); IPR008189 (PIRSF); IPR014777 (G3DSA:3.40.1010.GENE3D); IPR008189 (TIGRFAM); IPR008189 (PANTHER); PTHR46111:SF1 (PANTHER); IPR018063 (PROSITE_PATTERNS); IPR008189 (HAMAP); IPR008189 (CDD); IPR035996 (SUPERFAMILY)	F:GO:0008168	F:methyltransferase activity
WP_003090076.1	MULTISPECIES: hypothetical protein [Pseudomonas]	50	7	15	7	19.5	500	7	0	Yes	1.0427	0.703233		-1.33607	0.0279304		1.747	0.00189776	Up	1.07991	0.457945		PA2582		hypothetical protein	PA2582	1.09867	0.313034	T	P:GO:0010608; F:GO:0033592; F:GO:0034057; C:GO:0005829	P:posttranscriptional regulation of gene expression; F:RNA strand annealing activity; F:RNA strand-exchange activity; C:cytosol			Coil (COILS); IPR036442 (G3DSA:1.10.1710.GENE3D); IPR016103 (PFAM); mobidb-lite (MOBIDB_LITE); mobidb-lite (MOBIDB_LITE); mobidb-lite (MOBIDB_LITE); IPR023529 (PANTHER); IPR036442 (SUPERFAMILY)	P:GO:0010608; F:GO:0003723; F:GO:0033592; F:GO:0034057	P:posttranscriptional regulation of gene expression; F:RNA binding; F:RNA strand annealing activity; F:RNA strand-exchange activity
WP_003092887.1	MULTISPECIES: 23S rRNA (adenine(1618)-N(6))-methyltransferase RlmF [Pseudomonas]	13	4	6	4	37.6	158	4	0	Yes	1.03296	0.567246		1.15685	0.0520985		1.74638	0.0308281	Up	-1.24684	0.0013261		PA3840		conserved hypothetical protein	PA3840	-1.07014	0.624137	J	P:GO:0070475; F:GO:0052907; C:GO:0005737	P:rRNA base methylation; F:23S rRNA (adenine(1618)-N(6))-methyltransferase activity; C:cytoplasm	EC:2.1.1.181	23S rRNA (adenine(1618)-N(6))-methyltransferase	IPR010286 (PFAM); G3DSA:3.40.50.150 (GENE3D); IPR016909 (PIRSF); mobidb-lite (MOBIDB_LITE); IPR010286 (PANTHER); IPR016909 (HAMAP); cd02440 (CDD); IPR029063 (SUPERFAMILY)	P:GO:0006364; F:GO:0008168; F:GO:0008988; C:GO:0005737	P:rRNA processing; F:methyltransferase activity; F:rRNA (adenine-N6-)-methyltransferase activity; C:cytoplasm
WP_003104050.1	MULTISPECIES: tRNA dihydrouridine(20/20a) synthase DusA [Pseudomonas]	19	5	6	5	36.9	137	5	0	Yes	1.08395	0.509376		-1.28728	0.193484		1.74601	0.00836853	Up	1.03444	0.751777		PA2795	dusA	dihydrouridine synthase A	PA2795	-1.45358	0.000957595	J	P:GO:0002943; F:GO:0000049; F:GO:0010181; F:GO:0050660; F:GO:0102264; C:GO:0005829	P:tRNA dihydrouridine synthesis; F:tRNA binding; F:FMN binding; F:flavin adenine dinucleotide binding; F:tRNA-dihydrouridine20 synthase activity; C:cytosol	EC:1.3.1.91	tRNA-dihydrouridine(20) synthase (NAD(P)(+))	IPR004653 (TIGRFAM); IPR035587 (PFAM); IPR001269 (PIRSF); G3DSA:1.20.120.1460 (GENE3D); IPR013785 (G3DSA:3.20.20.GENE3D); PTHR42907:SF1 (PANTHER); IPR004653 (PANTHER); IPR018517 (PROSITE_PATTERNS); IPR004653 (HAMAP); IPR035587 (CDD); SSF51395 (SUPERFAMILY)	P:GO:0002943; P:GO:0008033; F:GO:0003824; F:GO:0017150; F:GO:0050660	P:tRNA dihydrouridine synthesis; P:tRNA processing; F:catalytic activity; F:tRNA dihydrouridine synthase activity; F:flavin adenine dinucleotide binding
WP_003093168.1	MULTISPECIES: DNA polymerase III subunit delta [Pseudomonas]	26	6	16	6	37.4	600	6	0	Yes	1.01783	0.631318		1.08146	0.113387		1.74485	0.000243411	Up	-1.16692	0.0126014		PA3989	holA	DNA polymerase III, delta subunit	holA	1.31769	0.0279093	L	P:GO:0006261; P:GO:0071897; F:GO:0003677; F:GO:0003887; C:GO:0005622; C:GO:0009360	P:DNA-dependent DNA replication; P:DNA biosynthetic process; F:DNA binding; F:DNA-directed DNA polymerase activity; C:intracellular anatomical structure; C:DNA polymerase III complex	EC:2.7.7.7	DNA-directed DNA polymerase	G3DSA:1.20.272.10 (GENE3D); IPR027417 (G3DSA:3.40.50.GENE3D); IPR005790 (TIGRFAM); IPR032780 (PFAM); G3DSA:1.10.8.60 (GENE3D); IPR010372 (PFAM); PTHR34388 (PANTHER); cd18138 (CDD); IPR027417 (SUPERFAMILY); IPR008921 (SUPERFAMILY)	P:GO:0006260; F:GO:0003677; F:GO:0003887; C:GO:0009360	P:DNA replication; F:DNA binding; F:DNA-directed DNA polymerase activity; C:DNA polymerase III complex
WP_003091640.1	MULTISPECIES: ATP-dependent RNA helicase HrpA [Pseudomonas]	31	37	81	37	149.9	2076	37	0	Yes	1.11206	0.0364952		-1.04591	0.124721		1.74309	1.25285e-06	Up	1.29618	0.00359844		PA3297		probable ATP-dependent helicase	PA3297	1.00176	0.987442	L	P:GO:0006397; P:GO:0009451; F:GO:0003724; F:GO:0017111	P:mRNA processing; P:RNA modification; F:RNA helicase activity; F:nucleoside-triphosphatase activity	EC:3.6.1; EC:3.6.4.13	Acting on acid anhydrides; RNA helicase	Coil (COILS); IPR024590 (PFAM); IPR010222 (TIGRFAM); IPR007502 (PFAM); IPR001650 (PFAM); IPR027417 (G3DSA:3.40.50.GENE3D); IPR011709 (PFAM); IPR027417 (G3DSA:3.40.50.GENE3D); G3DSA:1.20.120.1080 (GENE3D); PTHR18934:SF99 (PANTHER); PTHR18934 (PANTHER); IPR014001 (PROSITE_PROFILES); IPR001650 (PROSITE_PROFILES); cd17989 (CDD); cd18791 (CDD); IPR027417 (SUPERFAMILY)	F:GO:0003724; F:GO:0004386	F:RNA helicase activity; F:helicase activity
WP_003104132.1	MULTISPECIES: beta-ketoacyl-ACP synthase II [Pseudomonas]	29	7	24	7	43.5	996	7	0	Yes	1.08882	0.279556		1.48062	0.00558343		1.74294	0.00085013	Up	-1.37561	0.00783816		PA2965	fabF1	beta-ketoacyl-acyl carrier protein synthase II	fabF1	-1.04938	0.587148	I	P:GO:0006633; F:GO:0004315; C:GO:0005829	P:fatty acid biosynthetic process; F:3-oxoacyl-[acyl-carrier-protein] synthase activity; C:cytosol	EC:2.3.1.41; EC:2.3.1.85	Beta-ketoacyl-[acyl-carrier-protein] synthase I; Fatty-acid synthase system	IPR014031 (PFAM); IPR017568 (TIGRFAM); IPR016039 (G3DSA:3.40.47.GENE3D); IPR014030 (PFAM); IPR016039 (G3DSA:3.40.47.GENE3D); IPR017568 (PIRSF); PTHR11712:SF336 (PANTHER); IPR000794 (PANTHER); IPR018201 (PROSITE_PATTERNS); IPR000794 (CDD); IPR016039 (SUPERFAMILY); IPR016039 (SUPERFAMILY)	P:GO:0006633; F:GO:0004315; F:GO:0016746; F:GO:0016747	P:fatty acid biosynthetic process; F:3-oxoacyl-[acyl-carrier-protein] synthase activity; F:acyltransferase activity; F:acyltransferase activity, transferring groups other than amino-acyl groups
WP_003086023.1	MULTISPECIES: hypothetical protein [Pseudomonas]	25	3	8	3	15.8	199	3	0	Yes	1.03051	0.791584		1.13339	0.158009		1.74281	0.00249265	Up	-1.48561	0.0068227		PA0926		hypothetical protein	PA0926	-1.38793	0.00015852						no IPS match	no IPS match	no IPS match
WP_003084974.1	MULTISPECIES: DUF805 domain-containing protein [Pseudomonas]	20	2	9	2	13.3	217	2	0	Yes	1.20828	0.366654		1.31213	0.246897		1.74087	0.0769689		1.24335	0.49524		PA0563		conserved hypothetical protein	PA0563	2.65349	6.16e-05	S	C:GO:0005886; C:GO:0016021	C:plasma membrane; C:integral component of membrane			IPR008523 (PFAM); IPR008523 (PANTHER); PTHR34980:SF2 (PANTHER)	C:GO:0016021	C:integral component of membrane
WP_003082169.1	MULTISPECIES: flagellar basal body P-ring protein FlgI [Pseudomonas]	11	3	4	3	38.2	52	3	0	Yes	-1.06075	0.936492		1.56816	0.197547		1.74055	0.189096		-1.64433	0.0895629		PA1084	flgI	flagellar P-ring protein precursor FlgI	flgI	1.09219	0.469382	N	P:GO:0071973; F:GO:0005198; C:GO:0009428; C:GO:0030288	P:bacterial-type flagellum-dependent cell motility; F:structural molecule activity; C:bacterial-type flagellum basal body, distal rod, P ring; C:outer membrane-bounded periplasmic space			IPR001782 (PRINTS); IPR001782 (PFAM); IPR001782 (PANTHER); IPR001782 (HAMAP)	P:GO:0071973; F:GO:0005198; C:GO:0009428; C:GO:0030288	P:bacterial-type flagellum-dependent cell motility; F:structural molecule activity; C:bacterial-type flagellum basal body, distal rod, P ring; C:outer membrane-bounded periplasmic space
WP_003091605.1	MULTISPECIES: MFS transporter [Pseudomonas]	11	6	15	6	68.5	560	6	0	Yes	1.07705	0.537218		1.12252	0.0196045		1.73782	0.000419475	Up	1.05905	0.201168		PA3267		hypothetical protein	PA3267	1.09561	0.467421	I	P:GO:0006654; P:GO:0055085; F:GO:0003841; F:GO:0022857; C:GO:0005886; C:GO:0016021	P:phosphatidic acid biosynthetic process; P:transmembrane transport; F:1-acylglycerol-3-phosphate O-acyltransferase activity; F:transmembrane transporter activity; C:plasma membrane; C:integral component of membrane	EC:2.3.1.51; EC:7	1-acylglycerol-3-phosphate O-acyltransferase; Translocases	IPR036259 (G3DSA:1.20.1250.GENE3D); IPR011701 (PFAM); IPR002123 (PFAM); PTHR10434:SF15 (PANTHER); PTHR10434 (PANTHER); cd07989 (CDD); cd06173 (CDD); SSF69593 (SUPERFAMILY); IPR036259 (SUPERFAMILY)	P:GO:0055085; F:GO:0016746; F:GO:0022857	P:transmembrane transport; F:acyltransferase activity; F:transmembrane transporter activity
WP_003092403.1	MULTISPECIES: succinyldiaminopimelate transaminase [Pseudomonas]	18	7	26	7	44.5	643	7	0	Yes	1.11363	0.190856		1.43869	0.00256104		1.73463	0.000669653	Up	-1.51528	0.0020141	Lower	PA3659		probable aminotransferase	PA3659	-1.30154	0.130829	E	P:GO:0009089; F:GO:0009016; F:GO:0010285; F:GO:0030170	P:lysine biosynthetic process via diaminopimelate; F:succinyldiaminopimelate transaminase activity; F:L,L-diaminopimelate aminotransferase activity; F:pyridoxal phosphate binding	EC:2.6.1.83; EC:2.6.1.17	LL-diaminopimelate aminotransferase; Succinyldiaminopimelate transaminase	IPR015421 (G3DSA:3.40.640.GENE3D); IPR015422 (G3DSA:3.90.1150.GENE3D); IPR019878 (TIGRFAM); IPR004839 (PFAM); PTHR42832:SF3 (PANTHER); PTHR42832 (PANTHER); cd00609 (CDD); IPR015424 (SUPERFAMILY)	P:GO:0009058; P:GO:0009089; F:GO:0003824; F:GO:0009016; F:GO:0030170	P:biosynthetic process; P:lysine biosynthetic process via diaminopimelate; F:catalytic activity; F:succinyldiaminopimelate transaminase activity; F:pyridoxal phosphate binding
WP_003094416.1	MULTISPECIES: DUF2138 domain-containing protein [Pseudomonas]	47	21	65	21	64.3	1658	21	0	Yes	-1.1034	0.182631		-1.02443	0.749724		1.73315	0.000292911	Up	1.57778	0.00172873	Higher	PA4491	magB	MagB	PA4491	1.90069	2.05e-09	S	C:GO:0005829; C:GO:0016021	C:cytosol; C:integral component of membrane			IPR018671 (PFAM)	no GO terms	no GO terms
WP_003086351.1	MULTISPECIES: ATP-dependent DNA helicase DinG [Pseudomonas]	18	14	25	13	78.9	499	14	1	Yes	1.17477	0.300571		1.37539	0.0832473		1.73195	0.00979142	Up	1.01889	0.882109		PA1045		hypothetical protein	PA1045	-1.42084	0.00125348	KL	P:GO:0006139; P:GO:0032508; F:GO:0003677; F:GO:0003678; F:GO:0005524; F:GO:0016818; F:GO:0046872; F:GO:0051539	P:nucleobase-containing compound metabolic process; P:DNA duplex unwinding; F:DNA binding; F:DNA helicase activity; F:ATP binding; F:hydrolase activity, acting on acid anhydrides, in phosphorus-containing anhydrides; F:metal ion binding; F:4 iron, 4 sulfur cluster binding	EC:3.6.1; EC:3.6.4.12	Acting on acid anhydrides; DNA helicase	IPR027417 (G3DSA:3.40.50.GENE3D); IPR006555 (PFAM); IPR027417 (G3DSA:3.40.50.GENE3D); IPR045028 (PANTHER); PTHR11472:SF59 (PANTHER); IPR039000 (HAMAP); IPR014013 (PROSITE_PROFILES); IPR027417 (SUPERFAMILY)	P:GO:0006139; F:GO:0003676; F:GO:0003678; F:GO:0004386; F:GO:0005524; F:GO:0016818	P:nucleobase-containing compound metabolic process; F:nucleic acid binding; F:DNA helicase activity; F:helicase activity; F:ATP binding; F:hydrolase activity, acting on acid anhydrides, in phosphorus-containing anhydrides
WP_003091856.1	MULTISPECIES: alpha-ketoacid dehydrogenase subunit beta [Pseudomonas]	17	5	10	5	36.1	306	5	0	Yes	1.25	0.448341		1.33796	0.371484		1.72994	0.180998		-17.9367	0.000310124	Lower	PA3416		probable pyruvate dehydrogenase E1 component, beta chain	PA3416	-2.09475	0.000986434	C	F:GO:0004739; C:GO:0005618; C:GO:0005886	F:pyruvate dehydrogenase (acetyl-transferring) activity; C:cell wall; C:plasma membrane	EC:1.2.4.1	Pyruvate dehydrogenase (acetyl-transferring)	IPR005475 (PFAM); G3DSA:3.40.50.970 (GENE3D); IPR009014 (G3DSA:3.40.50.GENE3D); IPR033248 (PFAM); PTHR42980 (PANTHER); cd07036 (CDD); IPR009014 (SUPERFAMILY); IPR029061 (SUPERFAMILY)	F:GO:0003824	F:catalytic activity
WP_003097132.1	MULTISPECIES: F0F1 ATP synthase subunit gamma [Pseudomonas]	44	11	56	11	31.5	1384	11	0	Yes	-1.06138	0.245015		1.09284	0.100664		1.72992	0.000425743	Up	-1.36543	0.000934494		PA5555	atpG	ATP synthase gamma chain	atpG	2.29232	0.0127519	C	F:GO:0005524; F:GO:0008553; F:GO:0016887; F:GO:0046933; F:GO:0046961; C:GO:0005618; C:GO:0045261	F:ATP binding; F:P-type proton-exporting transporter activity; F:ATP hydrolysis activity; F:proton-transporting ATP synthase activity, rotational mechanism; F:proton-transporting ATPase activity, rotational mechanism; C:cell wall; C:proton-transporting ATP synthase complex, catalytic core F(1)	EC:7.1.2.2; EC:7.1.3.1; EC:3.6.1; EC:7.1.2.1; EC:6	H(+)-transporting two-sector ATPase; H(+)-exporting diphosphatase; Acting on acid anhydrides; P-type H(+)-exporting transporter; Ligases	IPR000131 (PRINTS); G3DSA:1.10.287.80 (GENE3D); IPR000131 (PFAM); IPR000131 (TIGRFAM); G3DSA:3.40.1380.10 (GENE3D); IPR000131 (PANTHER); PTHR11693:SF22 (PANTHER); IPR023632 (PROSITE_PATTERNS); IPR000131 (HAMAP); IPR000131 (CDD); IPR035968 (SUPERFAMILY)	P:GO:0015986; F:GO:0046933; C:GO:0045261	P:ATP synthesis coupled proton transport; F:proton-transporting ATP synthase activity, rotational mechanism; C:proton-transporting ATP synthase complex, catalytic core F(1)
WP_003085940.1	MULTISPECIES: ABC transporter ATP-binding protein [Pseudomonas]	56	14	51	14	27.9	1156	14	0	Yes	-1.17609	0.0541765		1.00374	0.925582		1.72895	0.000292885	Up	1.17747	0.0725524		PA0892	aotP	arginine/ornithine transport protein AotP	aotP	1.40712	0.0788091	E	P:GO:0097638; P:GO:0097640; F:GO:0005524; F:GO:0015424; F:GO:0016887; C:GO:0005886	P:L-arginine import across plasma membrane; P:L-ornithine import across plasma membrane; F:ATP binding; F:ABC-type amino acid transporter activity; F:ATP hydrolysis activity; C:plasma membrane	EC:3.6.1; EC:7	Acting on acid anhydrides; Translocases	IPR030679 (PIRSF); IPR027417 (G3DSA:3.40.50.GENE3D); IPR003439 (PFAM); PTHR43166:SF15 (PANTHER); PTHR43166 (PANTHER); IPR017871 (PROSITE_PATTERNS); IPR003439 (PROSITE_PROFILES); cd03262 (CDD); IPR027417 (SUPERFAMILY)	P:GO:0003333; F:GO:0005524; F:GO:0015424	P:amino acid transmembrane transport; F:ATP binding; F:ABC-type amino acid transporter activity
WP_003095689.1	MULTISPECIES: hypothetical protein [Pseudomonas]	15	4	6	4	36.5	263	4	0	Yes	1.05985	0.725857		-1.26303	0.453464		1.72756	0.12294		-1.35666	0.515356		PA4966		hypothetical protein	PA4966	1.2097	0.28205	S	F:GO:0016853	F:isomerase activity	EC:5	Isomerases	IPR027372 (PFAM); mobidb-lite (MOBIDB_LITE); SSF101898 (SUPERFAMILY)	no GO terms	no GO terms
WP_003095001.1	MULTISPECIES: glutamyl-tRNA reductase [Pseudomonas]	24	9	23	9	46.1	676	9	0	Yes	1.11649	0.0104565		1.09548	0.0213403		1.72502	3.46244e-06	Up	1.05756	0.212214		PA4666	hemA	glutamyl-tRNA reductase	hemA	-1.26753	0.00874801	H	P:GO:0019353; F:GO:0008883; F:GO:0042802; F:GO:0050661	P:protoporphyrinogen IX biosynthetic process from glutamate; F:glutamyl-tRNA reductase activity; F:identical protein binding; F:NADP binding	EC:1.2.1.70	Glutamyl-tRNA reductase	G3DSA:3.40.50.720 (GENE3D); IPR015896 (PFAM); IPR000343 (TIGRFAM); IPR015895 (PFAM); IPR036343 (G3DSA:3.30.460.GENE3D); IPR000343 (PIRSF); IPR006151 (PFAM); PTHR43013 (PANTHER); IPR018214 (PROSITE_PATTERNS); IPR000343 (HAMAP); cd05213 (CDD); IPR036453 (SUPERFAMILY); IPR036291 (SUPERFAMILY); IPR036343 (SUPERFAMILY)	P:GO:0033014; F:GO:0008883; F:GO:0050661	P:tetrapyrrole biosynthetic process; F:glutamyl-tRNA reductase activity; F:NADP binding
WP_031629682.1	MULTISPECIES: ribonuclease E [Pseudomonas]	37	25	138	25	117.4	3952	25	0	Yes	1.06285	0.290462		-1.31989	0.00119373		1.72447	3.07362e-05	Up	1.12284	0.0456288		PA2976	rne	ribonuclease E	rne	1.32295	0.163342	J	P:GO:0000967; P:GO:0006402; P:GO:0008033; P:GO:0051289; P:GO:0051336; P:GO:0090502; P:GO:1902280; F:GO:0000287; F:GO:0004521; F:GO:0008270; F:GO:0008312; F:GO:0008995; F:GO:0017151; F:GO:0042802; C:GO:0005737; C:GO:0009898	P:rRNA 5'-end processing; P:mRNA catabolic process; P:tRNA processing; P:protein homotetramerization; P:regulation of hydrolase activity; P:RNA phosphodiester bond hydrolysis, endonucleolytic; P:regulation of RNA helicase activity; F:magnesium ion binding; F:endoribonuclease activity; F:zinc ion binding; F:7S RNA binding; F:ribonuclease E activity; F:DEAD/H-box RNA helicase binding; F:identical p…	EC:3.1	Acting on ester bonds	Coil (COILS); Coil (COILS); G3DSA:3.40.1260.20 (GENE3D); IPR004659 (TIGRFAM); G3DSA:2.40.50.140 (GENE3D); IPR003029 (PFAM); IPR019307 (PFAM); mobidb-lite (MOBIDB_LITE); mobidb-lite (MOBIDB_LITE); mobidb-lite (MOBIDB_LITE); mobidb-lite (MOBIDB_LITE); mobidb-lite (MOBIDB_LITE); mobidb-lite (MOBIDB_LITE); IPR004659 (PANTHER); PTHR30001:SF1 (PANTHER); IPR003029 (PROSITE_PROFILES); IPR028878 (HAMAP); …	P:GO:0006396; F:GO:0003676; F:GO:0003723; F:GO:0004540; F:GO:0008995	P:RNA processing; F:nucleic acid binding; F:RNA binding; F:ribonuclease activity; F:ribonuclease E activity
WP_003122741.1	MULTISPECIES: helix-turn-helix transcriptional regulator [Pseudomonas]	10	2	3	2	31.8	50	2	0	Yes	1.0446	0.866758		1.02343	0.90253		1.72147	0.0536477	Up	-1.0393	0.870832		PA2281		probable transcriptional regulator	PA2281	-1.12296	0.207578	K	P:GO:0006355; F:GO:0003700; F:GO:0043565	P:regulation of transcription, DNA-templated; F:DNA-binding transcription factor activity; F:sequence-specific DNA binding			IPR018060 (PFAM); G3DSA:1.10.10.60 (GENE3D); PTHR47893 (PANTHER); IPR018062 (PROSITE_PATTERNS); IPR018060 (PROSITE_PROFILES); IPR009057 (SUPERFAMILY); IPR009057 (SUPERFAMILY)	P:GO:0006355; F:GO:0003700; F:GO:0043565	P:regulation of transcription, DNA-templated; F:DNA-binding transcription factor activity; F:sequence-specific DNA binding
WP_003096601.1	MULTISPECIES: guanylate kinase [Pseudomonas]	37	7	14	7	23.1	375	7	0	Yes	-1.03694	0.389742		-1.10246	0.0537666		1.71809	9.2295e-05	Up	-1.15366	0.153736		PA5336	gmk	guanylate kinase	gmk	-1.22158	0.0112956	F	P:GO:0016310; P:GO:0046037; P:GO:0046710; P:GO:0046940; P:GO:1901068; F:GO:0004385; F:GO:0005524; F:GO:0042802; C:GO:0005829	P:phosphorylation; P:GMP metabolic process; P:GDP metabolic process; P:nucleoside monophosphate phosphorylation; P:guanosine-containing compound metabolic process; F:guanylate kinase activity; F:ATP binding; F:identical protein binding; C:cytosol	EC:2.7.4.4; EC:2.7.4.8	Nucleoside-phosphate kinase; Guanylate kinase	G3DSA:3.30.63.10 (GENE3D); IPR027417 (G3DSA:3.40.50.GENE3D); IPR008145 (PFAM); IPR017665 (TIGRFAM); PTHR23117 (PANTHER); IPR020590 (PROSITE_PATTERNS); IPR008144 (PROSITE_PROFILES); IPR017665 (HAMAP); cd00071 (CDD); IPR027417 (SUPERFAMILY)	P:GO:0006163; F:GO:0004385	P:purine nucleotide metabolic process; F:guanylate kinase activity
WP_003087121.1	MULTISPECIES: glutathione S-transferase [Pseudomonas]	21	4	7	4	25.4	245	4	0	Yes	1.2383	0.04463		1.64237	0.0016745	Up	1.71704	0.00123798	Up				PA1466		hypothetical protein	PA1466	1.01564	0.885207	O	P:GO:0006749; F:GO:0004364; F:GO:0005515	P:glutathione metabolic process; F:glutathione transferase activity; F:protein binding	EC:2.5.1.18	Glutathione transferase	IPR004045 (PFAM); G3DSA:3.40.30.10 (GENE3D); IPR004046 (PFAM); G3DSA:1.20.1050.10 (GENE3D); SFLDG00358 (SFLD); IPR040079 (SFLD); PTHR44051:SF10 (PANTHER); PTHR44051 (PANTHER); IPR004045 (PROSITE_PROFILES); IPR010987 (PROSITE_PROFILES); cd03057 (CDD); IPR036249 (SUPERFAMILY); IPR036282 (SUPERFAMILY)	P:GO:0006749; F:GO:0005515	P:glutathione metabolic process; F:protein binding
WP_003091854.1	MULTISPECIES: hypothetical protein [Pseudomonas]	42	3	10	3	10.2	296	3	0	Yes	-1.27808	0.00699198		-1.27593	0.00624056		1.7156	0.000175845	Up	1.03176	0.615129		PA3413		conserved hypothetical protein	PA3413	-2.08545	1.51e-06	S	P:GO:0006281; P:GO:0009432; P:GO:0010165; C:GO:0005829	P:DNA repair; P:SOS response; P:response to X-ray; C:cytosol			Coil (COILS); IPR009813 (PFAM); IPR038627 (G3DSA:1.10.10.GENE3D)	no GO terms	no GO terms
WP_003084122.1	MULTISPECIES: DUF2875 domain-containing protein [Pseudomonas]	10	5	7	5	52.5	202	5	0	Yes	1.06572	0.523803		1.00517	0.955987		1.71316	0.0101155	Up				PA0259	tla3	Type 6 lipase adaptor, Tla3				S					IPR021531 (PFAM); mobidb-lite (MOBIDB_LITE)	no GO terms	no GO terms
WP_003091011.1	MULTISPECIES: precorrin-2 C(20)-methyltransferase [Pseudomonas]	24	5	14	5	27.3	203	5	0	Yes	1.11771	0.0105456		1.30234	0.000243081		1.71052	3.70935e-06	Up	-1.11111	0.362029		PA2904	cobI	precorrin-2 methyltransferase CobI	cobI	1.1175	0.393589	H	P:GO:0009236; P:GO:0032259; F:GO:0030788; C:GO:0005886	P:cobalamin biosynthetic process; P:methylation; F:precorrin-2 C20-methyltransferase activity; C:plasma membrane	EC:2.1.1.130	Precorrin-2 C(20)-methyltransferase	IPR000878 (PFAM); IPR014776 (G3DSA:3.30.950.GENE3D); IPR012382 (PIRSF); IPR014777 (G3DSA:3.40.1010.GENE3D); IPR006364 (TIGRFAM); PTHR43467:SF2 (PANTHER); PTHR43467 (PANTHER); IPR012382 (CDD); IPR035996 (SUPERFAMILY)	P:GO:0009236; F:GO:0008168; F:GO:0008757; F:GO:0030788	P:cobalamin biosynthetic process; F:methyltransferase activity; F:S-adenosylmethionine-dependent methyltransferase activity; F:precorrin-2 C20-methyltransferase activity
WP_003096334.1	MULTISPECIES: transcription termination factor Rho [Pseudomonas]	45	16	95	16	47	2351	16	0	Yes	-1.08019	0.0707505		-1.07951	0.0966893		1.7054	0.000954439	Up	1.02558	0.520452		PA5239	rho	transcription termination factor Rho	rho	-2.07972	1.56e-08	K	P:GO:0006353; F:GO:0003723; F:GO:0004386; F:GO:0005524; F:GO:0008186; F:GO:0042802; C:GO:0005829	P:DNA-templated transcription, termination; F:RNA binding; F:helicase activity; F:ATP binding; F:ATP-dependent activity, acting on RNA; F:identical protein binding; C:cytosol			IPR004665 (TIGRFAM); IPR027417 (G3DSA:3.40.50.GENE3D); IPR000194 (PFAM); IPR011113 (PFAM); IPR011112 (PFAM); G3DSA:1.10.720.10 (GENE3D); G3DSA:2.40.50.140 (GENE3D); IPR004665 (PANTHER); IPR011113 (PROSITE_PROFILES); IPR004665 (HAMAP); IPR041703 (CDD); IPR011113 (CDD); IPR027417 (SUPERFAMILY); IPR036269 (SUPERFAMILY); IPR012340 (SUPERFAMILY)	P:GO:0006353; F:GO:0003723; F:GO:0005524; F:GO:0008186	P:DNA-templated transcription, termination; F:RNA binding; F:ATP binding; F:ATP-dependent activity, acting on RNA
WP_014603502.1	MULTISPECIES: DUF2339 domain-containing protein [Pseudomonas]	5	7	17	7	128.2	287	7	0	Yes	1.47922	0.0427517		1.63733	0.000816088	Up	1.70212	4.81059e-06	Up	1.20088	0.02864		PA5114		hypothetical protein	PA5114	1.43466	0.000972726	S	C:GO:0016021	C:integral component of membrane			Coil (COILS); IPR019286 (PFAM); mobidb-lite (MOBIDB_LITE); mobidb-lite (MOBIDB_LITE); IPR019286 (PANTHER)	no GO terms	no GO terms
WP_003085558.1	MULTISPECIES: signal peptidase I [Pseudomonas]	45	12	43	12	32.1	976	12	0	Yes	-1.11191	0.0670085		1.07897	0.145384		1.70039	6.04277e-05	Up	-1.03097	0.681654		PA0768	lepB	signal peptidase I	lepB	1.03429	0.0391418	U	P:GO:0006465; F:GO:0004252; C:GO:0005887	P:signal peptide processing; F:serine-type endopeptidase activity; C:integral component of plasma membrane	EC:3.4.21	Acting on peptide bonds (peptidases)	IPR000223 (PRINTS); G3DSA:2.10.109.10 (GENE3D); IPR019533 (PFAM); IPR000223 (TIGRFAM); PTHR43390:SF1 (PANTHER); IPR000223 (PANTHER); IPR019757 (PROSITE_PATTERNS); IPR019756 (PROSITE_PATTERNS); IPR019758 (PROSITE_PATTERNS); IPR019533 (CDD); IPR036286 (SUPERFAMILY)	P:GO:0006465; P:GO:0006508; F:GO:0004252; F:GO:0008236; C:GO:0016020; C:GO:0016021	P:signal peptide processing; P:proteolysis; F:serine-type endopeptidase activity; F:serine-type peptidase activity; C:membrane; C:integral component of membrane
WP_003097255.1	MULTISPECIES: membrane protein insertase YidC [Pseudomonas]	20	8	30	8	64	728	8	0	Yes	-1.01605	0.881349		1.09423	0.283785		1.70037	0.000712407	Up	1.04066	0.645996		PA5568		conserved hypothetical protein	PA5568	-1.30595	0.0705082	U	P:GO:0006457; P:GO:0015031; P:GO:0015833; P:GO:0051205; P:GO:0051260; F:GO:0005215; F:GO:0032977; C:GO:0005887	P:protein folding; P:protein transport; P:peptide transport; P:protein insertion into membrane; P:protein homooligomerization; F:transporter activity; F:membrane insertase activity; C:integral component of plasma membrane	EC:7	Translocases	IPR001708 (PRINTS); IPR001708 (PRINTS); IPR028053 (TIGRFAM); IPR028055 (TIGRFAM); IPR001708 (PFAM); IPR038221 (G3DSA:2.70.98.GENE3D); IPR038210 (PFAM); mobidb-lite (MOBIDB_LITE); mobidb-lite (MOBIDB_LITE); IPR001708 (PANTHER); PTHR12428:SF14 (PANTHER); IPR019998 (HAMAP)	F:GO:0032977; C:GO:0016021	F:membrane insertase activity; C:integral component of membrane
WP_003095503.1	MULTISPECIES: bacterioferritin [Pseudomonas]	46	7	26	7	20.2	859	7	0	Yes	1.16041	0.0344852		-1.09676	0.125359		1.69779	0.000167798	Up	2.16759	0.00105111	Higher	PA4880		probable bacterioferritin	PA4880	-1.05701	0.830101	P	P:GO:0006826; P:GO:0006879; F:GO:0004322; F:GO:0008199	P:iron ion transport; P:cellular iron ion homeostasis; F:ferroxidase activity; F:ferric iron binding	EC:1.16.3.1	Ferroxidase	Coil (COILS); IPR002024 (PRINTS); IPR014490 (PIRSF); IPR008331 (PFAM); IPR012347 (G3DSA:1.20.1260.GENE3D); PTHR30295 (PANTHER); PTHR30295:SF1 (PANTHER); IPR009040 (PROSITE_PROFILES); cd00657 (CDD); IPR009078 (SUPERFAMILY)	P:GO:0006826; P:GO:0006879; F:GO:0008199	P:iron ion transport; P:cellular iron ion homeostasis; F:ferric iron binding
WP_003106336.1	MULTISPECIES: 1-(5-phosphoribosyl)-5-[(5-phosphoribosylamino)methylideneamino]imidazole-4-carboxamide isomerase [Pseudomonas]	62	12	40	12	25.9	1316	12	0	Yes	1.0761	0.255382		1.04717	0.448935		1.69604	0.000402399	Up	-1.19315	0.0409166		PA5141	hisA	phosphoribosylformimino-5-aminoimidazole carboxamide	hisA	-1.07012	0.523131	E	P:GO:0000105; P:GO:0000162; F:GO:0003949; C:GO:0005737	P:histidine biosynthetic process; P:tryptophan biosynthetic process; F:1-(5-phosphoribosyl)-5-[(5-phosphoribosylamino)methylideneamino]imidazole-4-carboxamide isomerase activity; C:cytoplasm	EC:5.3.1.16	1-(5-phosphoribosyl)-5-	IPR006062 (PFAM); IPR006063 (TIGRFAM); IPR013785 (G3DSA:3.20.20.GENE3D); IPR044524 (PANTHER); PTHR43090:SF2 (PANTHER); IPR023016 (HAMAP); IPR023016 (CDD); IPR011060 (SUPERFAMILY)	P:GO:0000105; F:GO:0003824; F:GO:0003949	P:histidine biosynthetic process; F:catalytic activity; F:1-(5-phosphoribosyl)-5-[(5-phosphoribosylamino)methylideneamino]imidazole-4-carboxamide isomerase activity
WP_003131123.1	MULTISPECIES: DNA translocase FtsK [Pseudomonas]	20	17	45	17	88.9	816	17	0	Yes	1.05714	0.310454		1.11429	0.127997		1.69493	0.000454372	Up	1.1174	0.389382		PA2615	ftsK	cell division protein FtsK	ftsK	1.22163	0.0837474	D	P:GO:0007049; P:GO:0007059; P:GO:0051301; F:GO:0003677; F:GO:0005524; C:GO:0005886; C:GO:0016021	P:cell cycle; P:chromosome segregation; P:cell division; F:DNA binding; F:ATP binding; C:plasma membrane; C:integral component of membrane			IPR002543 (PFAM); IPR036388 (G3DSA:1.10.10.GENE3D); IPR041027 (PFAM); G3DSA:3.30.980.40 (GENE3D); IPR018541 (PFAM); IPR025199 (PFAM); IPR027417 (G3DSA:3.40.50.GENE3D); mobidb-lite (MOBIDB_LITE); mobidb-lite (MOBIDB_LITE); mobidb-lite (MOBIDB_LITE); PTHR22683:SF41 (PANTHER); PTHR22683 (PANTHER); IPR002543 (PROSITE_PROFILES); IPR036390 (SUPERFAMILY); IPR027417 (SUPERFAMILY)	F:GO:0000166; F:GO:0003677; F:GO:0005524	F:nucleotide binding; F:DNA binding; F:ATP binding
WP_003096105.1	MULTISPECIES: DUF4102 domain-containing protein [Pseudomonas]	15	5	9	5	45.1	250	5	0	Yes	1.1411	0.0437484		1.2137	0.0183781		1.69138	0.000611565	Up										L	P:GO:0006310; P:GO:0015074; F:GO:0003677	P:DNA recombination; P:DNA integration; F:DNA binding			IPR025166 (PFAM); IPR010998 (G3DSA:1.10.150.GENE3D); IPR038488 (G3DSA:3.30.160.GENE3D); IPR004107 (PFAM); IPR002104 (PFAM); IPR013762 (G3DSA:1.10.443.GENE3D); mobidb-lite (MOBIDB_LITE); PTHR30629 (PANTHER); IPR044068 (PROSITE_PROFILES); IPR002104 (PROSITE_PROFILES); cd00801 (CDD); IPR011010 (SUPERFAMILY)	P:GO:0006310; P:GO:0015074; F:GO:0003677	P:DNA recombination; P:DNA integration; F:DNA binding
WP_003096201.1	MULTISPECIES: beta-ketoacyl synthase [Pseudomonas]	35	18	101	18	68.7	2905	18	0	Yes	-1.02281	0.653227		1.17049	0.095385		1.6905	0.0001551	Up	-1.35594	0.00573915		PA5174	fabY	beta-acetoacetyl-acyl carrier protein synthase FabY	PA5174	-1.00486	0.959208	IQ	P:GO:0006633; P:GO:0009245; P:GO:0009372; P:GO:0019290; F:GO:0004315; F:GO:0033818; C:GO:0005829	P:fatty acid biosynthetic process; P:lipid A biosynthetic process; P:quorum sensing; P:siderophore biosynthetic process; F:3-oxoacyl-[acyl-carrier-protein] synthase activity; F:beta-ketoacyl-acyl-carrier-protein synthase III activity; C:cytosol	EC:2.3.1.85; EC:2.3.1.41; EC:2.3.1.180	Fatty-acid synthase system; Beta-ketoacyl-[acyl-carrier-protein] synthase I; Beta-ketoacyl-[acyl-carrier-protein] synthase III	IPR016039 (G3DSA:3.40.47.GENE3D); IPR014030 (PFAM); IPR014031 (PFAM); IPR000794 (PANTHER); IPR000794 (PANTHER); PTHR11712:SF336 (PANTHER); PTHR11712:SF336 (PANTHER); cd00828 (CDD); IPR016039 (SUPERFAMILY); IPR016039 (SUPERFAMILY)	F:GO:0016746	F:acyltransferase activity
WP_003085956.1	MULTISPECIES: N-succinylarginine dihydrolase [Pseudomonas]	25	10	32	10	48.8	1063	10	0	Yes	1.13261	0.0211168		1.28843	0.000493909		1.68837	0.00158873	Up	-1.12357	0.0881515		PA0899	aruB	N2-Succinylarginine dihydrolase	aruB	1.40137	0.169834	E	P:GO:0019544; P:GO:0019545; F:GO:0009015	P:arginine catabolic process to glutamate; P:arginine catabolic process to succinate; F:N-succinylarginine dihydrolase activity	EC:3.5.3.23	N-succinylarginine dihydrolase	IPR007079 (TIGRFAM); IPR037031 (G3DSA:3.75.10.GENE3D); IPR007079 (PFAM); PTHR30420 (PANTHER); PTHR30420:SF2 (PANTHER); IPR007079 (HAMAP); SSF55909 (SUPERFAMILY)	P:GO:0006525; F:GO:0009015	P:arginine metabolic process; F:N-succinylarginine dihydrolase activity
WP_023098410.1	MULTISPECIES: methionyl-tRNA formyltransferase [Pseudomonas]	57	13	36	13	33	1042	13	0	Yes	1.05857	0.244144		1.33169	0.00174178		1.68745	8.40984e-05	Up				PA0018	fmt	methionyl-tRNA formyltransferase	fmt	-1.09656	0.394551	J	P:GO:0006413; P:GO:0071951; F:GO:0004479; C:GO:0005829	P:translational initiation; P:conversion of methionyl-tRNA to N-formyl-methionyl-tRNA; F:methionyl-tRNA formyltransferase activity; C:cytosol	EC:2.1.2.9	Methionyl-tRNA formyltransferase	IPR037022 (G3DSA:3.10.25.GENE3D); IPR002376 (PFAM); IPR005793 (PFAM); G3DSA:3.40.50.170 (GENE3D); IPR005794 (TIGRFAM); PTHR11138 (PANTHER); PTHR11138:SF5 (PANTHER); IPR001555 (PROSITE_PATTERNS); IPR005794 (HAMAP); IPR044135 (CDD); IPR041711 (CDD); IPR011034 (SUPERFAMILY); IPR036477 (SUPERFAMILY)	P:GO:0009058; P:GO:0071951; F:GO:0003824; F:GO:0004479; F:GO:0016742	P:biosynthetic process; P:conversion of methionyl-tRNA to N-formyl-methionyl-tRNA; F:catalytic activity; F:methionyl-tRNA formyltransferase activity; F:hydroxymethyl-, formyl- and related transferase activity
WP_003085848.1	MULTISPECIES: threonine dehydratase [Pseudomonas]	9	2	3	2	34	84	2	0	Yes	1.25982	0.128945		1.78208	0.00722589	Up	1.68694	0.0129423	Up				PA0851		hypothetical protein	PA0851	1.00966	0.929209	E	P:GO:0006520; F:GO:0030170	P:cellular amino acid metabolic process; F:pyridoxal phosphate binding			IPR036052 (G3DSA:3.40.50.GENE3D); IPR036052 (G3DSA:3.40.50.GENE3D); IPR001926 (PFAM); PTHR48078:SF7 (PANTHER); PTHR48078 (PANTHER); IPR000634 (PROSITE_PATTERNS); cd01562 (CDD); IPR036052 (SUPERFAMILY)	P:GO:0006520; F:GO:0030170	P:cellular amino acid metabolic process; F:pyridoxal phosphate binding
WP_003086049.1	MULTISPECIES: DUF2058 family protein [Pseudomonas]	30	6	17	6	20.8	490	6	0	Yes	1.21493	0.0280573		-1.6774	0.00215607	Down	1.6823	0.00045842	Up	-1.33859	0.00815733		PA0937		conserved hypothetical protein	PA0937	1.32735	0.0637888	S					Coil (COILS); Coil (COILS); IPR018636 (PFAM); mobidb-lite (MOBIDB_LITE); mobidb-lite (MOBIDB_LITE)	no GO terms	no GO terms
WP_003085953.1	MULTISPECIES: succinylglutamate-semialdehyde dehydrogenase [Pseudomonas]	33	14	50	14	51.5	1722	14	0	Yes	1.10022	0.0566574		1.07313	0.108988		1.68039	9.55846e-05	Up				PA0898	aruD	N-Succinylglutamate 5-semialdehyde dehydrogenase	aruD	1.34961	0.159711	C	P:GO:0019544; P:GO:0019545; F:GO:0004029; F:GO:0043824	P:arginine catabolic process to glutamate; P:arginine catabolic process to succinate; F:aldehyde dehydrogenase (NAD+) activity; F:succinylglutamate-semialdehyde dehydrogenase activity	EC:1.2.1.71; EC:1.2.1.5; EC:1.2.1.3	Succinylglutamate-semialdehyde dehydrogenase; Aldehyde dehydrogenase (NAD(P)(+)); Aldehyde dehydrogenase (NAD(+))	IPR016162 (G3DSA:3.40.605.GENE3D); IPR017649 (TIGRFAM); IPR015590 (PFAM); IPR016163 (G3DSA:3.40.309.GENE3D); IPR017649 (PTHR11699:PANTHER); PTHR11699 (PANTHER); IPR016160 (PROSITE_PATTERNS); IPR029510 (PROSITE_PATTERNS); IPR017649 (HAMAP); IPR017649 (CDD); IPR016161 (SUPERFAMILY)	P:GO:0006527; F:GO:0016491; F:GO:0016620; F:GO:0043824	P:arginine catabolic process; F:oxidoreductase activity; F:oxidoreductase activity, acting on the aldehyde or oxo group of donors, NAD or NADP as acceptor; F:succinylglutamate-semialdehyde dehydrogenase activity
WP_003102831.1	MULTISPECIES: cytochrome c4 [Pseudomonas]	27	5	45	5	20.7	1188	5	0	Yes	-1.10136	0.215735		-1.02781	0.72934		1.6785	0.00256089	Up	1.01845	0.82358		PA5490	cc4	cytochrome c4 precursor	cc4	-1.14328	0.230745	C	P:GO:0022900; F:GO:0005506; F:GO:0009055; F:GO:0020037; C:GO:0042597	P:electron transport chain; F:iron ion binding; F:electron transfer activity; F:heme binding; C:periplasmic space	EC:1	Oxidoreductases	IPR024167 (PIRSF); IPR036909 (G3DSA:1.10.760.GENE3D); IPR009056 (PFAM); IPR036909 (G3DSA:1.10.760.GENE3D); PTHR33751:SF9 (PANTHER); PTHR33751 (PANTHER); IPR009056 (PROSITE_PROFILES); IPR009056 (PROSITE_PROFILES); IPR036909 (SUPERFAMILY); IPR036909 (SUPERFAMILY)	F:GO:0005506; F:GO:0009055; F:GO:0020037; C:GO:0042597	F:iron ion binding; F:electron transfer activity; F:heme binding; C:periplasmic space
WP_003088032.1	MULTISPECIES: fatty acid cis/trans isomerase [Pseudomonas]	14	9	12	9	86.5	235	9	0	Yes	1.26012	0.446533		-1.02972	0.96399		1.67817	0.117201		-1.0292	0.785541		PA1846	cti	cis/trans isomerase	cti	-1.03113	0.670319	M	P:GO:0022900; F:GO:0009055; F:GO:0016853; F:GO:0020037; F:GO:0046872	P:electron transport chain; F:electron transfer activity; F:isomerase activity; F:heme binding; F:metal ion binding	EC:1; EC:5	Oxidoreductases; Isomerases	IPR010706 (PFAM); IPR009056 (PROSITE_PROFILES)	F:GO:0009055; F:GO:0020037	F:electron transfer activity; F:heme binding
WP_003092745.1	MULTISPECIES: M23 family metallopeptidase [Pseudomonas]	24	5	10	5	30.8	279	5	0	Yes	1.1664	0.157299		-1.22416	0.22722		1.67634	0.00259957	Up	1.09813	0.331922		PA3787		conserved hypothetical protein	PA3787	-1.03594	0.627537	M	P:GO:0006508; F:GO:0004222; F:GO:0046872	P:proteolysis; F:metalloendopeptidase activity; F:metal ion binding	EC:3.4.24	Acting on peptide bonds (peptidases)	IPR016047 (PFAM); IPR011055 (G3DSA:2.70.70.GENE3D); IPR040487 (PFAM); G3DSA:2.60.40.1590 (GENE3D); PTHR21666 (PANTHER); PTHR21666:SF273 (PANTHER); IPR011055 (SUPERFAMILY)	no GO terms	no GO terms
WP_003087875.1	MULTISPECIES: bifunctional aconitate hydratase 2/2-methylisocitrate dehydratase [Pseudomonas]	39	31	211	31	93.6	4988	31	0	Yes	1.12596	0.00165574		1.25448	2.27581e-05		1.67592	8.72426e-08	Up	-1.70068	2.57429e-05	Lower	PA1787	acnB	aconitate hydratase 2	acnB	1.43285	0.15907	C	P:GO:0006099; P:GO:0006417; P:GO:0017001; P:GO:0019629; P:GO:0042178; F:GO:0003730; F:GO:0003994; F:GO:0046872; F:GO:0047456; F:GO:0047780; F:GO:0051539; C:GO:0005829	P:tricarboxylic acid cycle; P:regulation of translation; P:antibiotic catabolic process; P:propionate catabolic process, 2-methylcitrate cycle; P:xenobiotic catabolic process; F:mRNA 3'-UTR binding; F:aconitate hydratase activity; F:metal ion binding; F:2-methylisocitrate dehydratase activity; F:citrate dehydratase activity; F:4 iron, 4 sulfur cluster binding; C:cytosol	EC:4.2.1.99; EC:4.2.1.3	2-methylisocitrate dehydratase; Aconitate hydratase	IPR015929 (PFAM); IPR036288 (G3DSA:1.25.40.GENE3D); IPR001030 (PFAM); IPR015928 (G3DSA:3.20.19.GENE3D); IPR004406 (PIRSF); IPR015931 (G3DSA:3.30.499.GENE3D); IPR015933 (PFAM); IPR015932 (G3DSA:3.40.1060.GENE3D); IPR015931 (G3DSA:3.30.499.GENE3D); IPR004406 (TIGRFAM); PTHR43160:SF4 (PANTHER); PTHR43160 (PANTHER); IPR018136 (PROSITE_PATTERNS); IPR015929 (CDD); cd01581 (CDD); IPR036288 (SUPERFAMILY)…	P:GO:0006099; F:GO:0003994; F:GO:0051539; C:GO:0005829	P:tricarboxylic acid cycle; F:aconitate hydratase activity; F:4 iron, 4 sulfur cluster binding; C:cytosol
WP_003086074.1	MULTISPECIES: NAD(P)H:quinone oxidoreductase [Pseudomonas]	29	5	15	5	20.7	394	5	0	Yes	1.11551	0.350201		1.16797	0.0988354		1.67541	0.00109588	Up				PA0949	wrbA	Trp repressor binding protein WrbA	wrbA	1.0948	0.34354	S	P:GO:0022900; F:GO:0003955; F:GO:0009055; F:GO:0010181	P:electron transport chain; F:NAD(P)H dehydrogenase (quinone) activity; F:electron transfer activity; F:FMN binding	EC:1.6.5.2	NAD(P)H dehydrogenase (quinone)	IPR005025 (PFAM); IPR029039 (G3DSA:3.40.50.GENE3D); IPR010089 (TIGRFAM); PTHR30546 (PANTHER); PTHR30546:SF23 (PANTHER); IPR001226 (PROSITE_PATTERNS); IPR008254 (PROSITE_PROFILES); IPR029039 (SUPERFAMILY)	F:GO:0003955; F:GO:0009055; F:GO:0010181; F:GO:0016491	F:NAD(P)H dehydrogenase (quinone) activity; F:electron transfer activity; F:FMN binding; F:oxidoreductase activity
WP_003093610.1	MULTISPECIES: MexW/MexI family multidrug efflux RND transporter permease subunit [Pseudomonas]	24	22	50	22	111	1294	22	0	Yes	1.02063	0.828402		1.33442	0.136452		1.67318	0.0382342	Up	-35.6189	0.00016387	Lower	PA4207	mexI	probable Resistance-Nodulation-Cell Division (RND) efflux transporter	mexI	1.08678	0.41834	U	P:GO:0055085; F:GO:0022857; C:GO:0016021	P:transmembrane transport; F:transmembrane transporter activity; C:integral component of membrane	EC:7	Translocases	IPR001036 (PRINTS); IPR001036 (PFAM); G3DSA:3.30.70.1430 (GENE3D); G3DSA:3.30.70.1440 (GENE3D); G3DSA:3.30.70.1430 (GENE3D); G3DSA:1.20.1640.10 (GENE3D); IPR027463 (G3DSA:3.30.2090.GENE3D); IPR027463 (G3DSA:3.30.2090.GENE3D); G3DSA:1.20.1640.10 (GENE3D); G3DSA:3.30.70.1320 (GENE3D); IPR001036 (PANTHER); PTHR32063:SF28 (PANTHER); SSF82693 (SUPERFAMILY); SSF82866 (SUPERFAMILY); IPR027463 (SUPERFAMI…	P:GO:0055085; F:GO:0022857; C:GO:0016020	P:transmembrane transport; F:transmembrane transporter activity; C:membrane
WP_003087781.1	MULTISPECIES: bifunctional phosphoserine phosphatase/homoserine phosphotransferase ThrH [Pseudomonas]	16	4	12	4	23.5	219	4	0	Yes	1.1245	0.164664		1.49088	0.00763603		1.67288	0.0022989	Up	-1.64274	0.00436654	Lower	PA1757	thrH	homoserine kinase	thrH	-1.54573	0.000763417	E	P:GO:0006564; P:GO:0009088; P:GO:0016310; P:GO:0016311; P:GO:0046654; F:GO:0000287; F:GO:0004413; F:GO:0036424; F:GO:0043899; F:GO:0046820; C:GO:0005737	P:L-serine biosynthetic process; P:threonine biosynthetic process; P:phosphorylation; P:dephosphorylation; P:tetrahydrofolate biosynthetic process; F:magnesium ion binding; F:homoserine kinase activity; F:L-phosphoserine phosphatase activity; F:phosphoserine:homoserine phosphotransferase activity; F:4-amino-4-deoxychorismate synthase activity; C:cytoplasm	EC:2.7.1.39; EC:2.6.1.85; EC:3.1.3.3	Homoserine kinase; Aminodeoxychorismate synthase; Phosphoserine phosphatase	PF12710 (PFAM); IPR023214 (G3DSA:3.40.50.GENE3D); IPR011863 (TIGRFAM); G3DSA:3.90.1470.10 (GENE3D); PTHR43344 (PANTHER); PTHR43344:SF2 (PANTHER); cd02607 (CDD); IPR036412 (SUPERFAMILY)	no GO terms	no GO terms
WP_003094763.1	MULTISPECIES: octaprenyl-diphosphate synthase [Pseudomonas]	39	11	48	11	34.8	1693	11	0	Yes	0.997962	0.975093		1.4415	0.000589599		1.66857	0.000437041	Up	-1.47371	0.000961602		PA4569	ispB	octaprenyl-diphosphate synthase	ispB	1.00153	0.985413	H	P:GO:0006744; P:GO:0016094; F:GO:0004659; F:GO:0042802; C:GO:0005829	P:ubiquinone biosynthetic process; P:polyprenol biosynthetic process; F:prenyltransferase activity; F:identical protein binding; C:cytosol	EC:2.5.1	Transferring alkyl or aryl groups, other than methyl groups	IPR000092 (PFAM); IPR008949 (G3DSA:1.10.600.GENE3D); SFLDS00005 (SFLD); PTHR12001 (PANTHER); PTHR12001:SF69 (PANTHER); IPR033749 (PROSITE_PATTERNS); IPR033749 (PROSITE_PATTERNS); IPR000092 (CDD); IPR008949 (SUPERFAMILY)	P:GO:0008299	P:isoprenoid biosynthetic process
WP_003134831.1	MULTISPECIES: alpha-2-macroglobulin family protein [Pseudomonas]	39	46	164	46	167.2	5051	46	0	Yes	-1.08708	0.00736932		-1.01887	0.177788		1.66569	2.25858e-06	Up	1.69378	0.000106166	Higher	PA4489	magD	MagD	PA4489	2.49803	2.39e-30	S	P:GO:0010951; F:GO:0004866	P:negative regulation of endopeptidase activity; F:endopeptidase inhibitor activity			IPR001599 (PFAM); IPR013783 (G3DSA:2.60.40.GENE3D); IPR011625 (PFAM); G3DSA:2.20.130.20 (GENE3D); G3DSA:1.50.10.20 (GENE3D); IPR002890 (PFAM); G3DSA:2.60.40.1930 (GENE3D); PTHR11412 (PANTHER); PTHR11412:SF161 (PANTHER); IPR008930 (SUPERFAMILY)	F:GO:0004866	F:endopeptidase inhibitor activity
WP_014603464.1	type VI secretion system tip protein VgrG [Pseudomonas aeruginosa]	29	16	34	10	82.7	1128	16	6	Yes	1.16707	0.0975103		1.87966	0.000226462	Up	1.66165	0.00397213	Up	1.59094	0.0012212	Higher	PA0095		vgrG1b	PA0095	2.10211	3.5e-08	U					PF05954 (PFAM); IPR006531 (PFAM); IPR037026 (G3DSA:2.40.50.GENE3D); IPR006533 (TIGRFAM); IPR017847 (TIGRFAM); G3DSA:2.30.110.50 (GENE3D); G3DSA:3.55.50.10 (GENE3D); IPR010609 (PFAM); G3DSA:4.10.220.110 (GENE3D); mobidb-lite (MOBIDB_LITE); mobidb-lite (MOBIDB_LITE); mobidb-lite (MOBIDB_LITE); mobidb-lite (MOBIDB_LITE); PTHR32305:SF11 (PANTHER); PTHR32305 (PANTHER); SSF69349 (SUPERFAMILY); SSF69255…	no GO terms	no GO terms
WP_003092082.1	MULTISPECIES: Grx4 family monothiol glutaredoxin [Pseudomonas]	61	6	43	6	11.8	890	6	0	Yes	1.14835	0.0123268		1.21875	0.00219302		1.66164	7.81226e-05	Up	-1.86099	2.83166e-06	Lower	PA3533	grxD	GrxD	PA3533	1.10805	0.443294	O	P:GO:0022900; P:GO:0045454; P:GO:0071236; F:GO:0009055; F:GO:0046872; F:GO:0051537; F:GO:0097573; C:GO:0005829	P:electron transport chain; P:cell redox homeostasis; P:cellular response to antibiotic; F:electron transfer activity; F:metal ion binding; F:2 iron, 2 sulfur cluster binding; F:glutathione oxidoreductase activity; C:cytosol	EC:1.8	Acting on a sulfur group of donors	IPR014434 (PIRSF); G3DSA:3.40.30.10 (GENE3D); IPR004480 (TIGRFAM); IPR002109 (PFAM); IPR004480 (PANTHER); PS51354 (PROSITE_PROFILES); IPR033658 (CDD); IPR036249 (SUPERFAMILY)	F:GO:0015036; F:GO:0097573	F:disulfide oxidoreductase activity; F:glutathione oxidoreductase activity
WP_003083590.1	MULTISPECIES: RNA 2'-phosphotransferase [Pseudomonas]	22	4	7	4	20	252	4	0	Yes	-1.1039	0.321929		1.26681	0.0308518		1.65761	0.00305486	Up				PA0054		conserved hypothetical protein	PA0054	1.15858	0.238691	J	P:GO:0006388; F:GO:0003950; F:GO:0016773	P:tRNA splicing, via endonucleolytic cleavage and ligation; F:NAD+ ADP-ribosyltransferase activity; F:phosphotransferase activity, alcohol group as acceptor	EC:2.7.1; EC:2.4.2.30	Transferring phosphorus-containing groups; NAD(+) ADP-ribosyltransferase	IPR002745 (PFAM); IPR042081 (G3DSA:3.20.170.GENE3D); IPR042080 (G3DSA:1.10.10.GENE3D); IPR002745 (PANTHER); IPR022928 (HAMAP); SSF56399 (SUPERFAMILY)	F:GO:0003950; F:GO:0016740	F:NAD+ ADP-ribosyltransferase activity; F:transferase activity
WP_003115146.1	MULTISPECIES: elongation factor Tu [Pseudomonas]	61	18	261	18	43.3	9284	18	0	Yes	1.07192	0.130759		1.14021	0.0215292		1.65674	2.95137e-05	Up	-1.33273	0.000874626		PA4265	tufA	elongation factor Tu	tufA	2.0358	0.00296489	J	P:GO:0006414; F:GO:0003746; F:GO:0003924; F:GO:0005525; C:GO:0005737	P:translational elongation; F:translation elongation factor activity; F:GTPase activity; F:GTP binding; C:cytoplasm	EC:3.6.1	Acting on acid anhydrides	IPR000795 (PRINTS); IPR000795 (PFAM); IPR027417 (G3DSA:3.40.50.GENE3D); G3DSA:2.40.30.10 (GENE3D); IPR005225 (TIGRFAM); G3DSA:2.40.30.10 (GENE3D); IPR004541 (TIGRFAM); IPR004161 (PFAM); IPR004160 (PFAM); PTHR43721 (PANTHER); PTHR43721:SF5 (PANTHER); IPR031157 (PROSITE_PATTERNS); IPR004541 (HAMAP); IPR000795 (PROSITE_PROFILES); IPR033720 (CDD); cd03707 (CDD); IPR041709 (CDD); IPR009000 (SUPERFAMIL…	P:GO:0006414; F:GO:0003746; F:GO:0003924; F:GO:0005525	P:translational elongation; F:translation elongation factor activity; F:GTPase activity; F:GTP binding
[truncated: 3,081 more rows]
