# Supplementary material for: Responses of carbapenemase-producing and non-producing carbapenem-resistant Pseudomonas aeruginosa strains to meropenem revealed by quantitative tandem mass spectrometry proteomics
Source: Front Microbiol. 2023 Feb 9;13:1089140. doi: 10.3389/fmicb.2022.1089140 (PMC9948630; doi:10.3389/fmicb.2022.1089140)
Supplement: SUPPLEMENTARY TABLE 3 — List of proteins of Pseudomonas aeruginosa CCUG 70744 detected with more than one peptide. The table includes their relative abundances (sub-MICs vs. no antibiotic; if quantitated), basal relative abundance compared to strain PAO1 (if fulfilling the criteria for being included in the inter-strain the comparison, i.e., ≥99% of sequence identity and with 100% coverage over the longer protein), P. aeruginosa PAO1 orthologues and functional annotations. Orthologous proteins differentially regulated in both strains are in bold and shaded. Gene expression data from the publicly available transcriptomic dataset that analyzed biofilms of P. aeruginosa PAO1 treated with meropenem (5 μg/ml) vs. no antibiotic (GEO accession number: GSE167137) is included in columns AA – AC. [file Table_3.XLSX]

## Sheet: Proteins CCUG 70744 (>1 pept.)
Supplementary table 3. List of proteins of Pseudomonas aeruginosa CCUG 70744 detected with more than one peptide.
												2 µg/ml VS 0 ng/µl			4 µg/ml VS 0 µg/ml			8 µg/ml VS 0 µg/ml			0 µg/ml VS CCUG 56489 (= PAO1) 0 µg/ml			P. aeruginosa PAO1 orthologues			GEO dataset GSE167137 (P. aeruginosa PAO1 biofilm treated with 5 µg/ml meropenem VS 0 µg/ml)
Accession	Protein description	Coverage [%]	# Peptides	# PSMs	# Unique Peptides	Molecular weight [kDa]	Mascot score	# Peptides (by Search Engine): Mascot	# Razor Peptides	# Unique + Razor Peptides	Quantitation	Fold change	p-value	Regulation	Fold change	p-value	Regulation	Fold change	p-value	Regulation	Fold change	p-value	Basal abundance	PAO1 locus tag	Gene name	Product description	ID	Fold change	p-value	COG categories	Gene Onthology (GO) IDs	GO names	Enzyme Comission (EC) numbers	Enzyme names	InterPro IDs	InterPro GO IDs	InterPro GO names
WP_003090796.1	MULTISPECIES: DUF3509 domain-containing protein [Pseudomonas]	40	2	6	2	8.5	88	2	0	2	Yes	-1.2138	0.342577		2.319	0.00550658	Up	22.8752	0.000117846	Up															IPR021898 (PFAM)	no GO terms	no GO terms
WP_003087466.1	MULTISPECIES: DUF3859 domain-containing protein [Pseudomonas]	42	5	14	5	17.7	590	5	0	5	Yes	-1.29175	0.0226181		7.10748	5.82791e-06	Up	16.8707	8.77404e-07	Up	3.37895	0.029452	Higher	PA1606		hypothetical protein	PA1606	-1.44333	0.20892	S	F:GO:0004386	F:helicase activity			IPR024331 (PFAM); G3DSA:2.60.40.2390 (GENE3D)	no GO terms	no GO terms
WP_003090877.1	MULTISPECIES: HD domain-containing protein [Pseudomonas]	41	6	13	6	21.6	354	6	0	6	Yes	-1.02564	0.64427		1.84318	4.21725e-05	Up	16.0102	2.65016e-07	Up	-2.57955	0.00226984	Lower	PA2804		hypothetical protein	PA2804	-1.1256	0.588169	S	F:GO:0016787	F:hydrolase activity	EC:3	Hydrolases	IPR006674 (PFAM); G3DSA:1.10.3210.10 (GENE3D); IPR017670 (TIGRFAM); PTHR40202 (PANTHER); IPR003607 (CDD); SSF109604 (SUPERFAMILY)	no GO terms	no GO terms
WP_003083094.1	MULTISPECIES: hypothetical protein [Pseudomonas]	11	2	4	2	32.3	128	2	0	2	Yes	1.00327	0.989584		2.58888	0.000352623	Up	15.6838	2.09504e-05	Up	-2.52781	0.00178442	Lower	PA1463		hypothetical protein	PA1463	-1.10404	0.343576	NT	P:GO:0006935; P:GO:0007165	P:chemotaxis; P:signal transduction			IPR014506 (PIRSF); IPR002545 (PFAM); IPR002545 (PROSITE_PROFILES); cd00588 (CDD); IPR036061 (SUPERFAMILY)	P:GO:0006935; P:GO:0007165	P:chemotaxis; P:signal transduction
WP_003114831.1	MULTISPECIES: hypothetical protein [Pseudomonas]	16	3	12	3	16.7	197	3	0	3	Yes	1.01454	0.864468		4.15297	6.56932e-06	Up	13.9185	4.10811e-05	Up	1.35678	0.0747101		PA3205		hypothetical protein	PA3205	1.6456	2.84e-05	NPTU	F:GO:0051082; C:GO:0030288	F:unfolded protein binding; C:outer membrane-bounded periplasmic space			Coil (COILS); IPR012899 (PIRSF); IPR012899 (PFAM); G3DSA:1.20.120.1490 (GENE3D); mobidb-lite (MOBIDB_LITE); mobidb-lite (MOBIDB_LITE); mobidb-lite (MOBIDB_LITE); PTHR38102:SF1 (PANTHER); PTHR38102 (PANTHER)	C:GO:0042597	C:periplasmic space
WP_003104779.1	MULTISPECIES: SH3 domain-containing protein [Pseudomonas]	27	6	8	6	24.1	305	6	0	6	Yes	1.46289	0.320714		2.68144	0.0311468	Up	12.3361	0.0017606	Up	0.716925	0.883108		PA4154		conserved hypothetical protein	PA4154	1.03473	0.840674	T	C:GO:0005829; C:GO:0005887	C:cytosol; C:integral component of plasma membrane			Coil (COILS); Coil (COILS); IPR016476 (TIGRFAM); IPR016476 (PIRSF); IPR003646 (PFAM); G3DSA:2.30.30.40 (GENE3D); IPR003646 (PROSITE_PROFILES)	no GO terms	no GO terms
WP_110183980.1	hemagglutination protein [Pseudomonas aeruginosa]	19	15	24	15	186.8	700	15	0	15	Yes	-1.14014	0.193658		3.08341	3.13471e-06	Up	11.3468	8.28464e-09	Up										U					G3DSA:3.30.160.710 (GENE3D); IPR012334 (G3DSA:2.160.20.GENE3D); IPR008638 (PFAM); IPR041286 (PFAM); IPR008638 (TIGRFAM); PTHR12338 (PANTHER); PTHR12338 (PANTHER); PTHR12338:SF8 (PANTHER); PTHR12338:SF8 (PANTHER); IPR011050 (SUPERFAMILY)	no GO terms	no GO terms
WP_003118203.1	class C beta-lactamase PDC-8 [Pseudomonas aeruginosa]	59	19	185	19	43.4	6038	19	0	19	Yes	3.25815	1.82709e-08	Up	10.0435	4.84716e-09	Up	11.303	2.54769e-10	Up	1.21053	0.0549688		PA4110	ampC	beta-lactamase precursor	ampC	53.6548	3.54e-46	V	P:GO:0017001; P:GO:0046677; F:GO:0008800; C:GO:0030288	P:antibiotic catabolic process; P:response to antibiotic; F:beta-lactamase activity; C:outer membrane-bounded periplasmic space	EC:3.5.2.6	Beta-lactamase	IPR012338 (G3DSA:3.40.710.GENE3D); IPR001466 (PFAM); PTHR43645 (PANTHER); PTHR43645:SF1 (PANTHER); IPR001586 (PROSITE_PATTERNS); IPR012338 (SUPERFAMILY)	P:GO:0017001; F:GO:0008800; C:GO:0030288	P:antibiotic catabolic process; F:beta-lactamase activity; C:outer membrane-bounded periplasmic space
WP_003082166.1	MULTISPECIES: flagellar L-ring protein [Pseudomonas]	11	2	3	2	24.5	133	2	0	2	Yes	-1.11139	0.144262		1.74139	4.59563e-05	Up	9.43535	2.63074e-08	Up	-2.61591	0.00185173	Lower	PA1083	flgH	flagellar L-ring protein precursor FlgH	flgH	-1.01285	0.924072	N	P:GO:0071973; F:GO:0003774; C:GO:0009279; C:GO:0009427	P:bacterial-type flagellum-dependent cell motility; F:cytoskeletal motor activity; C:cell outer membrane; C:bacterial-type flagellum basal body, distal rod, L ring			IPR000527 (PRINTS); IPR000527 (PFAM); mobidb-lite (MOBIDB_LITE); PTHR34933:SF1 (PANTHER); IPR000527 (PANTHER); IPR000527 (HAMAP); PS51257 (PROSITE_PROFILES)	P:GO:0071973; F:GO:0003774; C:GO:0009427	P:bacterial-type flagellum-dependent cell motility; F:cytoskeletal motor activity; C:bacterial-type flagellum basal body, distal rod, L ring
WP_003114166.1	MULTISPECIES: alkyl/aryl-sulfatase [Pseudomonas]	22	12	24	12	72.5	451	12	0	12	Yes	-1.31725	0.0846555		-1.34	0.00635529		8.98982	2.61656e-09	Up	-1.91859	0.0319492	Lower	PA0740	sdsA1	SDS hydrolase SdsA1	sdsA1	1.03357	0.745038	Q	P:GO:0018909; F:GO:0018741; F:GO:0042802; F:GO:0046872; F:GO:0046983; C:GO:0030288	P:dodecyl sulfate metabolic process; F:alkyl sulfatase activity; F:identical protein binding; F:metal ion binding; F:protein dimerization activity; C:outer membrane-bounded periplasmic space	EC:3.1.6	Acting on ester bonds	IPR038536 (G3DSA:1.25.40.GENE3D); IPR029228 (PFAM); IPR001279 (PFAM); IPR036527 (G3DSA:3.30.1050.GENE3D); G3DSA:3.60.15.30 (GENE3D); IPR029229 (PFAM); PTHR43223 (PANTHER); IPR044097 (CDD); IPR036527 (SUPERFAMILY); IPR036866 (SUPERFAMILY)	P:GO:0018909; F:GO:0018741; F:GO:0046983	P:dodecyl sulfate metabolic process; F:alkyl sulfatase activity; F:protein dimerization activity
WP_003098696.1	MULTISPECIES: phosphonates import ATP-binding protein PhnC 1 [Pseudomonas]	22	5	10	5	30.2	335	5	0	5	Yes	1.17066	0.112314		1.90953	0.000524657	Up	8.92186	2.00366e-05	Up	1.14431	0.36084		PA3384	phnC	ATP-binding component of ABC phosphonate transporter	phnC	-1.01866	0.943026	P	P:GO:0015716; F:GO:0005524; F:GO:0015416; F:GO:0016887; C:GO:0005886	P:organic phosphonate transport; F:ATP binding; F:ABC-type phosphonate transporter activity; F:ATP hydrolysis activity; C:plasma membrane	EC:3.6.1; EC:7.3.2.2	Acting on acid anhydrides; ABC-type phosphonate transporter	IPR003439 (PFAM); IPR012693 (TIGRFAM); IPR027417 (G3DSA:3.40.50.GENE3D); PTHR43166 (PANTHER); PTHR43166:SF6 (PANTHER); IPR017871 (PROSITE_PATTERNS); IPR003439 (PROSITE_PROFILES); IPR012693 (CDD); IPR027417 (SUPERFAMILY)	P:GO:0015716; F:GO:0005524; F:GO:0015416; C:GO:0016020	P:organic phosphonate transport; F:ATP binding; F:ABC-type phosphonate transporter activity; C:membrane
WP_003095236.1	MULTISPECIES: S-adenosylmethionine decarboxylase proenzyme [Pseudomonas]	22	3	6	3	17.3	144	3	0	3	Yes	1.01262	0.883259		1.58433	0.00868574	Up	7.83201	2.55856e-06	Up	1.19334	0.148213		PA4773	speD2	SpeD2	PA4773	1.43799	0.206238	E	P:GO:0006557; P:GO:0008295; F:GO:0004014; C:GO:0005829	P:S-adenosylmethioninamine biosynthetic process; P:spermidine biosynthetic process; F:adenosylmethionine decarboxylase activity; C:cytosol	EC:4.1.1.50	Adenosylmethionine decarboxylase	IPR017716 (TIGRFAM); IPR003826 (PFAM); G3DSA:3.60.90.10 (GENE3D); IPR003826 (PANTHER); PTHR33866:SF2 (PANTHER); IPR017716 (HAMAP); IPR016067 (SUPERFAMILY)	P:GO:0008295; F:GO:0004014	P:spermidine biosynthetic process; F:adenosylmethionine decarboxylase activity
WP_003138268.1	MULTISPECIES: ADP-glyceromanno-heptose 6-epimerase [Pseudomonas]	14	4	5	4	37.4	215	4	0	4	Yes	-1.07016	0.581503		1.57472	0.0025493	Up	7.80862	2.42263e-05	Up	2.16773	0.0516298	Higher	PA3337	rfaD	ADP-L-glycero-D-mannoheptose 6-epimerase	rfaD	1.29258	0.263861	G	P:GO:0009244; P:GO:0097171; F:GO:0008712; F:GO:0070401; C:GO:0005829	P:lipopolysaccharide core region biosynthetic process; P:ADP-L-glycero-beta-D-manno-heptose biosynthetic process; F:ADP-glyceromanno-heptose 6-epimerase activity; F:NADP+ binding; C:cytosol	EC:5.1.3.20	ADP-glyceromanno-heptose 6-epimerase	G3DSA:3.40.50.720 (GENE3D); G3DSA:3.90.25.10 (GENE3D); IPR011912 (TIGRFAM); IPR001509 (PFAM); PTHR43103 (PANTHER); PTHR43103:SF3 (PANTHER); IPR011912 (HAMAP); IPR011912 (CDD); IPR036291 (SUPERFAMILY)	P:GO:0005975; F:GO:0003824; F:GO:0008712; F:GO:0050661	P:carbohydrate metabolic process; F:catalytic activity; F:ADP-glyceromanno-heptose 6-epimerase activity; F:NADP binding
WP_003095513.1	MULTISPECIES: hypothetical protein [Pseudomonas]	54	8	25	8	21.5	595	8	0	8	Yes	-1.05658	0.375153		10.4051	7.68627e-09	Up	7.50873	1.22124e-06	Up	1.58487	0.000681263	Higher	PA4884		hypothetical protein	PA4884	1.02343	0.87866						mobidb-lite (MOBIDB_LITE)	no GO terms	no GO terms
WP_003083092.1	MULTISPECIES: ParA family protein [Pseudomonas]	18	4	7	4	28.4	218	4	0	4	Yes	-1.10968	0.423314		1.88018	0.00362213	Up	7.07178	1.5105e-05	Up	1.13614	0.378774		PA1462		probable plasmid partitioning protein	PA1462	-1.02553	0.780518	D					IPR025669 (PFAM); IPR027417 (G3DSA:3.40.50.GENE3D); PTHR13696:SF69 (PANTHER); PTHR13696 (PANTHER); cd02042 (CDD); IPR027417 (SUPERFAMILY)	no GO terms	no GO terms
WP_003094815.1	MULTISPECIES: cytochrome c551 peroxidase [Pseudomonas]	18	6	10	6	37.4	224	6	0	6	Yes	-1.02994	0.713102		1.76938	0.000138763	Up	6.96705	7.32671e-08	Up	1.21698	0.0196314		PA4587	ccpR	cytochrome c551 peroxidase precursor	ccpR	1.3778	0.0832153	C	P:GO:0022900; P:GO:0098869; F:GO:0004130; F:GO:0009055; F:GO:0020037; F:GO:0046872; C:GO:0042597	P:electron transport chain; P:cellular oxidant detoxification; F:cytochrome-c peroxidase activity; F:electron transfer activity; F:heme binding; F:metal ion binding; C:periplasmic space	EC:1.11.1.5	Cytochrome-c peroxidase	IPR009056 (PFAM); IPR036909 (G3DSA:1.10.760.GENE3D); IPR004852 (PFAM); IPR036909 (G3DSA:1.10.760.GENE3D); IPR026259 (PIRSF); PTHR30600:SF7 (PANTHER); PTHR30600 (PANTHER); IPR009056 (PROSITE_PROFILES); IPR009056 (PROSITE_PROFILES); IPR036909 (SUPERFAMILY); IPR036909 (SUPERFAMILY)	F:GO:0009055; F:GO:0016491; F:GO:0020037	F:electron transfer activity; F:oxidoreductase activity; F:heme binding
WP_023464896.1	response regulator [Pseudomonas aeruginosa]	22	7	11	7	34	322	7	0	7	Yes	1.01085	0.857791		1.53988	0.0135796	Up	6.6956	7.30014e-05	Up	1.22703	0.244295		PA2881		probable two-component response regulator	PA2881	-1.06059	0.767654	T	P:GO:0000160; P:GO:0009736	P:phosphorelay signal transduction system; P:cytokinin-activated signaling pathway			G3DSA:3.40.50.2300 (GENE3D); IPR001789 (PFAM); G3DSA:3.40.50.2300 (GENE3D); PTHR43874:SF124 (PANTHER); IPR045279 (PANTHER); IPR001789 (PROSITE_PROFILES); IPR001789 (PROSITE_PROFILES); cd17569 (CDD); IPR011006 (SUPERFAMILY); IPR011006 (SUPERFAMILY)	P:GO:0000160; P:GO:0009736	P:phosphorelay signal transduction system; P:cytokinin-activated signaling pathway
WP_012614417.1	MULTISPECIES: anthranilate synthase component 1 [Pseudomonas]	8	3	5	3	58.6	184	3	0	3	Yes	-1.05879	0.294549		-1.02282	0.623546		6.64204	2.05618e-07	Up	1.45527	0.035694		PA1001	phnA	anthranilate synthase component I	phnA	-1.03143	0.804937	E	P:GO:0000162; F:GO:0004049; F:GO:0046872; C:GO:0005829	P:tryptophan biosynthetic process; F:anthranilate synthase activity; F:metal ion binding; C:cytosol	EC:4.1.3.27	Anthranilate synthase	IPR019999 (PRINTS); IPR005257 (PIRSF); IPR015890 (PFAM); IPR006805 (PFAM); IPR005801 (G3DSA:3.60.120.GENE3D); IPR005257 (TIGRFAM); IPR019999 (PANTHER); IPR005257 (PTHR11236:PANTHER); IPR005801 (SUPERFAMILY)	P:GO:0009058; F:GO:0004049	P:biosynthetic process; F:anthranilate synthase activity
WP_003115568.1	MULTISPECIES: cold-shock protein CspA [Pseudomonas]	62	4	15	4	7.6	304	4	0	4	Yes	-1.14921	0.0922805		1.79026	9.57586e-05	Up	6.60737	1.32277e-06	Up	-1.20849	0.0175992		PA3266	capB	cold acclimation protein B	capB	1.48671	0.0684365	K	F:GO:0003676; C:GO:0005737	F:nucleic acid binding; C:cytoplasm			IPR002059 (PRINTS); G3DSA:2.40.50.140 (GENE3D); IPR002059 (PFAM); IPR012156 (PIRSF); PTHR11544 (PANTHER); PTHR11544:SF126 (PANTHER); IPR019844 (PROSITE_PATTERNS); IPR002059 (PROSITE_PROFILES); IPR002059 (CDD); IPR012340 (SUPERFAMILY)	F:GO:0003676	F:nucleic acid binding
WP_110184025.1	M23 family peptidase [Pseudomonas aeruginosa]	21	4	7	4	30.7	318	4	0	4	Yes	-1.28171	0.00617399		2.79727	4.42239e-06	Up	6.59044	2.38879e-08	Up	-3.48532	2.71378e-07	Lower	PA3787		conserved hypothetical protein	PA3787	-1.03594	0.627537	M	P:GO:0006508; F:GO:0004222; F:GO:0046872	P:proteolysis; F:metalloendopeptidase activity; F:metal ion binding	EC:3.4.24	Acting on peptide bonds (peptidases)	IPR011055 (G3DSA:2.70.70.GENE3D); G3DSA:2.60.40.1590 (GENE3D); IPR016047 (PFAM); IPR040487 (PFAM); PTHR21666 (PANTHER); PTHR21666:SF273 (PANTHER); IPR011055 (SUPERFAMILY)	no GO terms	no GO terms
WP_003113742.1	MULTISPECIES: cytochrome c [Pseudomonas]	7	3	5	3	46.7	196	3	0	3	Yes	-1.35516	0.00159416		4.22182	3.19395e-07	Up	6.4224	1.3364e-07	Up	3.22931	0.0158911	Higher	PA2266		probable cytochrome c precursor	PA2266	-1.02505	0.868268	C	P:GO:0022900; F:GO:0005506; F:GO:0009055; F:GO:0020037; F:GO:0033717; C:GO:0016020	P:electron transport chain; F:iron ion binding; F:electron transfer activity; F:heme binding; F:gluconate 2-dehydrogenase (acceptor) activity; C:membrane	EC:1.1.1; EC:1.1.99.3	Acting on the CH-OH group of donors; Gluconate 2-dehydrogenase (acceptor)	IPR008168 (PRINTS); IPR036909 (G3DSA:1.10.760.GENE3D); IPR036909 (G3DSA:1.10.760.GENE3D); IPR014353 (PIRSF); IPR009056 (PFAM); IPR009056 (PFAM); IPR036909 (G3DSA:1.10.760.GENE3D); mobidb-lite (MOBIDB_LITE); PTHR35008:SF8 (PANTHER); PTHR35008 (PANTHER); IPR009056 (PROSITE_PROFILES); IPR009056 (PROSITE_PROFILES); IPR009056 (PROSITE_PROFILES); IPR036909 (SUPERFAMILY); IPR036909 (SUPERFAMILY); IPR036…	F:GO:0005506; F:GO:0009055; F:GO:0016614; F:GO:0020037; C:GO:0016020	F:iron ion binding; F:electron transfer activity; F:oxidoreductase activity, acting on CH-OH group of donors; F:heme binding; C:membrane
WP_003082462.1	MULTISPECIES: tRNA 2-thiocytidine(32) synthetase TtcA [Pseudomonas]	28	7	11	7	31.2	255	7	0	7	Yes	0.996007	0.95847		1.66572	0.000251787	Up	6.16372	3.63588e-07	Up	0.893021	0.0570508		PA1192		conserved hypothetical protein	PA1192	-1.41064	0.00104243	J	P:GO:0034227; F:GO:0000049; F:GO:0000287; F:GO:0005524; F:GO:0016783; F:GO:0051539; C:GO:0005829	P:tRNA thio-modification; F:tRNA binding; F:magnesium ion binding; F:ATP binding; F:sulfurtransferase activity; F:4 iron, 4 sulfur cluster binding; C:cytosol	EC:2.8.1	Transferring sulfur-containing groups	IPR014729 (G3DSA:3.40.50.GENE3D); IPR011063 (PFAM); IPR035107 (PIRSF); PTHR43686:SF2 (PANTHER); PTHR43686 (PANTHER); IPR012089 (HAMAP); cd01993 (CDD); SSF52402 (SUPERFAMILY)	P:GO:0008033	P:tRNA processing
WP_003110746.1	MULTISPECIES: gluconate 2-dehydrogenase subunit 3 family protein [Pseudomonas]	27	4	10	4	26.3	320	4	0	4	Yes	1.01394	0.845886		4.09031	2.32659e-05	Up	5.83865	8.77643e-06	Up	1.3257	0.0158635		PA2264		conserved hypothetical protein	PA2264	-1.1243	0.419781	Q	F:GO:0033717	F:gluconate 2-dehydrogenase (acceptor) activity	EC:1.1.1; EC:1.1.99.3	Acting on the CH-OH group of donors; Gluconate 2-dehydrogenase (acceptor)	IPR027056 (PFAM)	no GO terms	no GO terms
WP_003115433.1	MULTISPECIES: histidinol-phosphate aminotransferase [Pseudomonas]	21	6	9	6	39.5	163	6	0	6	Yes	-1.12039	0.0515588		1.18977	0.0370343		5.67028	5.09973e-06	Up	1.94768	0.00580301	Higher	PA3165	hisC2	histidinol-phosphate aminotransferase	hisC2	1.41553	0.127757	E	P:GO:0000105; F:GO:0004400; F:GO:0030170	P:histidine biosynthetic process; F:histidinol-phosphate transaminase activity; F:pyridoxal phosphate binding	EC:2.6.1.9	Histidinol-phosphate transaminase	IPR015422 (G3DSA:3.90.1150.GENE3D); IPR015421 (G3DSA:3.40.640.GENE3D); IPR005861 (TIGRFAM); IPR004839 (PFAM); PTHR43643 (PANTHER); PTHR43643:SF3 (PANTHER); IPR001917 (PROSITE_PATTERNS); IPR005861 (HAMAP); cd00609 (CDD); IPR015424 (SUPERFAMILY)	P:GO:0000105; P:GO:0009058; F:GO:0003824; F:GO:0004400; F:GO:0016740; F:GO:0030170	P:histidine biosynthetic process; P:biosynthetic process; F:catalytic activity; F:histidinol-phosphate transaminase activity; F:transferase activity; F:pyridoxal phosphate binding
WP_023464965.1	tail-specific protease [Pseudomonas aeruginosa]	29	20	44	20	78.2	1101	20	0	20	Yes	1.0052	0.911581		3.45839	1.77199e-06	Up	5.63329	7.70128e-07	Up	-1.37646	0.00153756		PA3257	algO	AlgO				M	P:GO:0006508; P:GO:0007165; F:GO:0004175; F:GO:0005515; F:GO:0008236; C:GO:0030288	P:proteolysis; P:signal transduction; F:endopeptidase activity; F:protein binding; F:serine-type peptidase activity; C:outer membrane-bounded periplasmic space	EC:3.4	Acting on peptide bonds (peptidases)	Coil (COILS); Coil (COILS); IPR004447 (TIGRFAM); IPR036034 (G3DSA:2.30.42.GENE3D); G3DSA:3.30.750.44 (GENE3D); IPR005151 (PFAM); G3DSA:3.90.226.10 (GENE3D); IPR020992 (PFAM); IPR040573 (PFAM); IPR001478 (PFAM); mobidb-lite (MOBIDB_LITE); mobidb-lite (MOBIDB_LITE); PTHR32060:SF26 (PANTHER); PTHR32060 (PANTHER); IPR001478 (PROSITE_PROFILES); cd00988 (CDD); IPR004447 (CDD); IPR036034 (SUPERFAMILY); …	P:GO:0006508; F:GO:0005515; F:GO:0008236	P:proteolysis; F:protein binding; F:serine-type peptidase activity
WP_023464678.1	UDP-glucose/GDP-mannose dehydrogenase family protein [Pseudomonas aeruginosa]	5	2	3	2	49.7	129	2	0	2	Yes	-1.29909	0.367955		1.11755	0.502237		5.3299	0.000896676	Up	1.00709	0.834187		PA2022		probable nucleotide sugar dehydrogenase	PA2022	-1.09208	0.516883	M	P:GO:0006065; P:GO:0009103; F:GO:0003979; F:GO:0051287	P:UDP-glucuronate biosynthetic process; P:lipopolysaccharide biosynthetic process; F:UDP-glucose 6-dehydrogenase activity; F:NAD binding	EC:1.1.1.22	UDP-glucose 6-dehydrogenase	IPR017476 (PIRSF); IPR017476 (TIGRFAM); IPR001732 (PFAM); IPR014027 (PFAM); G3DSA:3.40.50.720 (GENE3D); IPR014026 (PFAM); IPR028357 (PIRSF); G3DSA:1.20.5.100 (GENE3D); G3DSA:3.40.50.720 (GENE3D); PTHR43750 (PANTHER); PTHR43750:SF3 (PANTHER); PS51257 (PROSITE_PROFILES); IPR008927 (SUPERFAMILY); IPR036220 (SUPERFAMILY); IPR036291 (SUPERFAMILY)	P:GO:0000271; F:GO:0003979; F:GO:0016616; F:GO:0051287	P:polysaccharide biosynthetic process; F:UDP-glucose 6-dehydrogenase activity; F:oxidoreductase activity, acting on the CH-OH group of donors, NAD or NADP as acceptor; F:NAD binding
WP_023465000.1	N-acetylglutaminylglutamine synthetase [Pseudomonas aeruginosa]	13	6	7	6	64.9	205	6	0	6	Yes	1.02033	0.798896		1.12195	0.30266		5.22764	0.000227973	Up	-7.64472	9.01238e-05	Lower	PA3460		probable acetyltransferase	PA3460	-1.13935	0.187639	HJK	F:GO:0005524; F:GO:0008080; F:GO:0046872; F:GO:0071160	F:ATP binding; F:N-acetyltransferase activity; F:metal ion binding; F:cyanophycin synthetase activity (L-aspartate-adding)	EC:6.3.2.29; EC:6.3.1; EC:2.3.1	Cyanophycin synthase (L-aspartate-adding); Forming carbon-nitrogen bonds; Acyltransferases	IPR013651 (PFAM); G3DSA:3.30.470.20 (GENE3D); IPR000182 (PFAM); G3DSA:3.40.630.30 (GENE3D); G3DSA:3.30.470.20 (GENE3D); IPR017534 (TIGRFAM); PTHR23135:SF4 (PANTHER); PTHR23135 (PANTHER); IPR002464 (PROSITE_PATTERNS); IPR000182 (PROSITE_PROFILES); IPR011761 (PROSITE_PROFILES); cd04301 (CDD); IPR016181 (SUPERFAMILY); SSF56059 (SUPERFAMILY)	F:GO:0005524; F:GO:0008080; F:GO:0046872	F:ATP binding; F:N-acetyltransferase activity; F:metal ion binding
WP_073662296.1	polyphosphate kinase 2 [Pseudomonas aeruginosa]	34	8	23	8	34.5	630	8	0	8	Yes	-1.03102	0.47664		2.82877	1.02396e-07	Up	5.21335	4.31528e-09	Up	2.05856	0.000192849	Higher	PA0141		conserved hypothetical protein	PA0141	1.29748	0.247604	S	P:GO:0006754; P:GO:0016310; F:GO:0008976	P:ATP biosynthetic process; P:phosphorylation; F:polyphosphate kinase activity	EC:2.7.4.1	Polyphosphate kinase	IPR022488 (PFAM); IPR027417 (G3DSA:3.40.50.GENE3D); IPR016898 (PIRSF); IPR022486 (TIGRFAM); mobidb-lite (MOBIDB_LITE); mobidb-lite (MOBIDB_LITE); PTHR34383:SF1 (PANTHER); PTHR34383 (PANTHER); IPR027417 (SUPERFAMILY)	P:GO:0006793; F:GO:0008976	P:phosphorus metabolic process; F:polyphosphate kinase activity
WP_003087267.1	MULTISPECIES: coproporphyrinogen III oxidase [Pseudomonas]	44	17	38	17	52.5	1244	17	0	17	Yes	1.01162	0.730998		1.16652	0.0202992		5.12866	7.58627e-07	Up	2.59955	5.32487e-05	Higher	PA1546	hemN	oxygen-independent coproporphyrinogen III oxidase	hemN	1.04077	0.848523	H	P:GO:0006782; F:GO:0004109; F:GO:0046872; F:GO:0051539; F:GO:0051989; C:GO:0005737	P:protoporphyrinogen IX biosynthetic process; F:coproporphyrinogen oxidase activity; F:metal ion binding; F:4 iron, 4 sulfur cluster binding; F:coproporphyrinogen dehydrogenase activity; C:cytoplasm	EC:1.3.98.3; EC:1.3.3.3	Coproporphyrinogen dehydrogenase; Coproporphyrinogen oxidase	G3DSA:1.10.10.920 (GENE3D); IPR004558 (PIRSF); IPR004558 (TIGRFAM); IPR007197 (PFAM); IPR023404 (G3DSA:3.80.30.GENE3D); IPR010723 (PFAM); IPR004558 (SFLD); IPR007197 (SFLD); SFLDG01082 (SFLD); IPR034505 (PANTHER); PTHR13932:SF6 (PANTHER); IPR007197 (PROSITE_PROFILES); cd01335 (CDD); SSF102114 (SUPERFAMILY)	P:GO:0006779; F:GO:0003824; F:GO:0004109; F:GO:0051536; C:GO:0005737	P:porphyrin-containing compound biosynthetic process; F:catalytic activity; F:coproporphyrinogen oxidase activity; F:iron-sulfur cluster binding; C:cytoplasm
WP_003098702.1	MULTISPECIES: phosphonate C-P lyase system protein PhnL [Pseudomonas]	60	11	34	11	26.2	1101	11	0	11	Yes	1.01639	0.58408		1.49532	3.94119e-05	Up	4.96863	0.000552725	Up	2.04598	1.55371e-06	Higher	PA3375		probable ATP-binding component of ABC transporter	PA3375	1.11964	0.68495	P	P:GO:0019700; F:GO:0005524; F:GO:0016829; F:GO:0016887; F:GO:0061693; C:GO:0061694	P:organic phosphonate catabolic process; F:ATP binding; F:lyase activity; F:ATP hydrolysis activity; F:alpha-D-ribose 1-methylphosphonate 5-triphosphate synthase activity; C:alpha-D-ribose 1-methylphosphonate 5-triphosphate synthase complex	EC:3.6.1; EC:4; EC:2.7.8.37	Acting on acid anhydrides; Lyases; Alpha-D-ribose 1-methylphosphonate 5-triphosphate synthase	IPR027417 (G3DSA:3.40.50.GENE3D); IPR012701 (TIGRFAM); IPR003439 (PFAM); PTHR42798:SF1 (PANTHER); PTHR42798 (PANTHER); IPR017871 (PROSITE_PATTERNS); IPR003439 (PROSITE_PROFILES); IPR027417 (SUPERFAMILY)	F:GO:0005524	F:ATP binding
WP_003093432.1	MULTISPECIES: LOG family protein [Pseudomonas]	12	6	9	6	51.1	214	6	0	6	Yes	-1.09211	0.505375		1.56894	0.00722358	Up	4.95404	6.17882e-05	Up	0.827243	0.0998277		PA4115		conserved hypothetical protein	PA4115	1.10983	0.678506	S	F:GO:0047405; C:GO:0005829	F:pyrimidine-5'-nucleotide nucleosidase activity; C:cytosol	EC:3.2.2.10	Pyrimidine-5'-nucleotide nucleosidase	IPR037153 (G3DSA:3.30.1850.GENE3D); IPR027820 (PFAM); IPR031100 (PFAM); IPR021826 (PFAM); G3DSA:3.40.50.450 (GENE3D); PTHR43393:SF1 (PANTHER); PTHR43393 (PANTHER); SSF102405 (SUPERFAMILY)	no GO terms	no GO terms
WP_003091776.1	MULTISPECIES: phosphonate metabolism protein PhnM [Pseudomonas]	49	13	33	13	41.6	1114	13	0	13	Yes	-1.00742	0.968217		2.28466	0.000270233	Up	4.91294	8.7241e-05	Up	1.81674	0.00094235	Higher	PA3374		conserved hypothetical protein	PA3374	1.02375	0.856813	P	P:GO:0019700; F:GO:0016810	P:organic phosphonate catabolic process; F:hydrolase activity, acting on carbon-nitrogen (but not peptide) bonds	EC:3.5	Acting on carbon-nitrogen bonds, other than peptide bonds	IPR012696 (TIGRFAM); IPR012696 (PIRSF); IPR013108 (PFAM); G3DSA:3.20.20.140 (GENE3D); PTHR43135 (PANTHER); IPR012696 (CDD); IPR032466 (SUPERFAMILY); IPR011059 (SUPERFAMILY)	P:GO:0019700; F:GO:0016810	P:organic phosphonate catabolic process; F:hydrolase activity, acting on carbon-nitrogen (but not peptide) bonds
WP_003087328.1	MULTISPECIES: hypothetical protein [Pseudomonas]	7	2	3	2	42.3	94	2	0	2	Yes	1.0436	0.573532		1.29632	0.00702292		4.90906	5.11023e-05	Up										GM					IPR013120 (PFAM); G3DSA:3.40.50.720 (GENE3D); PTHR43000:SF1 (PANTHER); PTHR43000 (PANTHER); IPR036291 (SUPERFAMILY)	no GO terms	no GO terms
WP_003083621.1	MULTISPECIES: oligopeptidase A [Pseudomonas]	33	19	57	19	76	1984	19	0	19	Yes	1.02002	0.496799		2.63095	7.59039e-08	Up	4.86147	5.84088e-06	Up	1.03414	0.323675		PA0067	prlC	oligopeptidase A	prlC	1.18366	0.306717	E	P:GO:0006508; F:GO:0004222; F:GO:0046872	P:proteolysis; F:metalloendopeptidase activity; F:metal ion binding	EC:3.4.24	Acting on peptide bonds (peptidases)	IPR001567 (PFAM); IPR024079 (G3DSA:3.40.390.GENE3D); IPR024077 (G3DSA:1.10.1370.GENE3D); IPR045666 (PFAM); IPR024080 (G3DSA:1.20.1050.GENE3D); IPR045090 (PANTHER); IPR034005 (CDD); SSF55486 (SUPERFAMILY)	P:GO:0006508; F:GO:0004222; F:GO:0008233; F:GO:0008237	P:proteolysis; F:metalloendopeptidase activity; F:peptidase activity; F:metallopeptidase activity
WP_003098703.1	MULTISPECIES: phosphonate metabolism protein/1,5-bisphosphokinase (PRPP-forming) PhnN [Pseudomonas]	23	3	5	3	20.2	108	3	0	3	Yes	-1.04921	0.848362		1.40255	0.0635192		4.76321	0.0001085	Up	1.04522	0.754819		PA3373		conserved hypothetical protein	PA3373	-1.01061	0.909714	P	P:GO:0006015; P:GO:0009435; P:GO:0019634; P:GO:0046835; F:GO:0005524; F:GO:0033863; C:GO:0005829	P:5-phosphoribose 1-diphosphate biosynthetic process; P:NAD biosynthetic process; P:organic phosphonate metabolic process; P:carbohydrate phosphorylation; F:ATP binding; F:ribose 1,5-bisphosphate phosphokinase activity; C:cytosol	EC:2.7.4.23	Ribose 1,5-bisphosphate phosphokinase	IPR027417 (G3DSA:3.40.50.GENE3D); IPR012699 (TIGRFAM); PTHR23117 (PANTHER); PTHR23117:SF8 (PANTHER); IPR012699 (HAMAP); IPR027417 (SUPERFAMILY)	P:GO:0006015; F:GO:0033863	P:5-phosphoribose 1-diphosphate biosynthetic process; F:ribose 1,5-bisphosphate phosphokinase activity
WP_003096384.1	MULTISPECIES: Rsd/AlgQ family anti-sigma factor [Pseudomonas]	16	2	9	2	16.4	264	2	0	2	Yes	1.13987	0.405362		3.15163	0.000263762	Up	4.68366	0.000298753	Up										K	P:GO:0006355; P:GO:0042121; P:GO:0045861; P:GO:1900192; P:GO:1900378; F:GO:0016989	P:regulation of transcription, DNA-templated; P:alginic acid biosynthetic process; P:negative regulation of proteolysis; P:positive regulation of single-species biofilm formation; P:positive regulation of secondary metabolite biosynthetic process; F:sigma factor antagonist activity			IPR038309 (G3DSA:1.20.120.GENE3D); IPR007448 (PIRSF); IPR007448 (PFAM)	P:GO:0006355	P:regulation of transcription, DNA-templated
WP_023464317.1	12-oxophytodienoate reductase [Pseudomonas aeruginosa]	36	12	19	12	40.3	463	12	0	12	Yes	1.00677	0.905406		2.58624	1.04409e-05	Up	4.679	4.01977e-05	Up	1.08418	0.225964		PA0840		probable oxidoreductase	PA0840	1.09824	0.53906	C	F:GO:0010181; F:GO:0016491; C:GO:0005829	F:FMN binding; F:oxidoreductase activity; C:cytosol	EC:1	Oxidoreductases	IPR001155 (PFAM); IPR013785 (G3DSA:3.20.20.GENE3D); IPR045247 (PANTHER); PTHR22893:SF91 (PANTHER); cd04747 (CDD); SSF51395 (SUPERFAMILY)	F:GO:0003824; F:GO:0010181; F:GO:0016491	F:catalytic activity; F:FMN binding; F:oxidoreductase activity
WP_003102379.1	MULTISPECIES: hypothetical protein [Pseudomonas]	16	4	7	4	35.8	349	4	0	4	Yes	1.045	0.505346		2.61167	1.46006e-06	Up	4.59111	3.17411e-06	Up	0.853081	0.0951939		PA0955		hypothetical protein	PA0955	-1.06511	0.597459						Coil (COILS); PS51257 (PROSITE_PROFILES)	no GO terms	no GO terms
WP_003103572.1	MULTISPECIES: Thiol:disulfide interchange protein DsbD 2 [Pseudomonas]	7	3	4	3	62.1	184	3	0	3	Yes	-1.15334	0.0777974		3.86562	3.2303e-05	Up	4.55969	1.97502e-05	Up	-3.42745	3.38465e-05	Lower	PA2478		probable thiol:disulfide interchange protein	PA2478	-1.46794	0.0179587	CO	P:GO:0017004; P:GO:0022900; P:GO:0045454; F:GO:0009055; F:GO:0047134; C:GO:0005887	P:cytochrome complex assembly; P:electron transport chain; P:cell redox homeostasis; F:electron transfer activity; F:protein-disulfide reductase (NAD(P)) activity; C:integral component of plasma membrane	EC:1.8.1.8	Protein-disulfide reductase	IPR003834 (PFAM); IPR036929 (G3DSA:2.60.40.GENE3D); PF13899 (PFAM); G3DSA:3.40.30.10 (GENE3D); IPR028250 (PFAM); PTHR32234 (PANTHER); IPR022910 (PTHR32234:PANTHER); IPR017937 (PROSITE_PATTERNS); IPR022910 (HAMAP); IPR013766 (PROSITE_PROFILES); IPR035671 (CDD); IPR036929 (SUPERFAMILY); IPR036249 (SUPERFAMILY)	P:GO:0017004; F:GO:0047134; C:GO:0016020	P:cytochrome complex assembly; F:protein-disulfide reductase (NAD(P)) activity; C:membrane
WP_003087752.1	MULTISPECIES: hypothetical protein [Pseudomonas]	28	4	10	4	14	187	4	0	4	Yes	1.10148	0.159928		1.83721	0.000116616	Up	4.55021	2.16896e-05	Up	1.12552	0.193737		PA1741		hypothetical protein	PA1741	-1.06614	0.521663	O	P:GO:0006749; P:GO:0022900; P:GO:0045454; F:GO:0005515; F:GO:0009055; F:GO:0015035	P:glutathione metabolic process; P:electron transport chain; P:cell redox homeostasis; F:protein binding; F:electron transfer activity; F:protein-disulfide reductase activity	EC:1.8	Acting on a sulfur group of donors	IPR004045 (PFAM); G3DSA:3.40.30.10 (GENE3D); PS51354 (PROSITE_PROFILES); IPR036249 (SUPERFAMILY)	P:GO:0006749; F:GO:0005515	P:glutathione metabolic process; F:protein binding
WP_019372057.1	MULTISPECIES: PqsB [Pseudomonas]	26	6	27	6	30.5	845	6	0	6	Yes	-1.12338	0.0294567		1.90448	1.01034e-05	Up	4.51361	4.36386e-07	Up	1.95931	5.03403e-06	Higher	PA0997	pqsB	PqsB	pqsB	1.36867	0.113335	I	P:GO:0044550; F:GO:0016746; C:GO:0005737	P:secondary metabolite biosynthetic process; F:acyltransferase activity; C:cytoplasm	EC:2.3	Acyltransferases	IPR016039 (G3DSA:3.40.47.GENE3D); IPR016039 (SUPERFAMILY)	F:GO:0016746	F:acyltransferase activity
WP_003123571.1	MULTISPECIES: AMIN domain-containing protein [Pseudomonas]	30	12	16	12	50.7	552	12	0	12	Yes	-1.02066	0.91984		2.97115	0.000214318	Up	4.48431	0.000267494	Up	1.10949	0.422723		PA4947	amiB	N-acetylmuramoyl-L-alanine amidase	amiB	1.03412	0.672895	M	P:GO:0009253; F:GO:0008745; C:GO:0030288	P:peptidoglycan catabolic process; F:N-acetylmuramoyl-L-alanine amidase activity; C:outer membrane-bounded periplasmic space	EC:3.5.1.28	N-acetylmuramoyl-L-alanine amidase	Coil (COILS); IPR002508 (PFAM); G3DSA:3.40.630.40 (GENE3D); G3DSA:2.60.40.3500 (GENE3D); IPR018392 (PFAM); IPR036779 (G3DSA:3.10.350.GENE3D); IPR021731 (PFAM); mobidb-lite (MOBIDB_LITE); mobidb-lite (MOBIDB_LITE); PTHR30404:SF1 (PANTHER); PTHR30404 (PANTHER); PS51257 (PROSITE_PROFILES); IPR018392 (PROSITE_PROFILES); IPR002508 (CDD); IPR018392 (CDD); SSF53187 (SUPERFAMILY); IPR036779 (SUPERFAMILY)	P:GO:0009253; F:GO:0008745	P:peptidoglycan catabolic process; F:N-acetylmuramoyl-L-alanine amidase activity
WP_003093604.1	MULTISPECIES: 3-carboxymuconate cyclase [Pseudomonas]	43	13	21	13	41.6	647	13	0	13	Yes	-1.02712	0.687123		3.45636	4.49926e-05	Up	4.44558	3.86739e-05	Up	2.20428	0.000116208	Higher	PA4204	ppgL	periplasmic gluconolactonase, PpgL	ppgL	1.21825	0.223972	G	F:GO:0005515; F:GO:0017057	F:protein binding; F:6-phosphogluconolactonase activity	EC:3.1.1.31; EC:3.1.1.1	6-phosphogluconolactonase; Carboxylesterase	IPR019405 (PFAM); IPR015943 (G3DSA:2.130.10.GENE3D); PTHR30344 (PANTHER); PTHR30344:SF8 (PANTHER); IPR011045 (SUPERFAMILY)	F:GO:0005515	F:protein binding
WP_003098701.1	MULTISPECIES: phosphonate C-P lyase system protein PhnK [Pseudomonas]	25	6	12	6	30	291	6	0	6	Yes	-1.08579	0.0648079		1.31325	0.00274395		4.33958	1.37058e-06	Up	2.49602	1.78743e-06	Higher	PA3376		probable ATP-binding component of ABC transporter	PA3376	1.07696	0.77122	P	P:GO:0019700; F:GO:0005524; F:GO:0016829; F:GO:0016887; C:GO:1904176	P:organic phosphonate catabolic process; F:ATP binding; F:lyase activity; F:ATP hydrolysis activity; C:carbon phosphorus lyase complex	EC:3.6.1; EC:4	Acting on acid anhydrides; Lyases	IPR012700 (PIRSF); IPR003439 (PFAM); IPR027417 (G3DSA:3.40.50.GENE3D); IPR012700 (TIGRFAM); PTHR42764:SF1 (PANTHER); PTHR42764 (PANTHER); IPR017871 (PROSITE_PATTERNS); IPR003439 (PROSITE_PROFILES); IPR027417 (SUPERFAMILY)	F:GO:0005524	F:ATP binding
WP_003092052.1	MULTISPECIES: hypothetical protein [Pseudomonas]	31	2	6	2	6.9	187	2	0	2	Yes	1.02804	0.729332		3.70884	5.11465e-08	Up	4.31488	1.3697e-05	Up	0.997848	0.945111		PA3496		hypothetical protein	PA3496	1.55028	0.00884929		F:GO:0004812	F:aminoacyl-tRNA ligase activity	EC:6.1.1	Forming carbon-oxygen bonds	mobidb-lite (MOBIDB_LITE)	no GO terms	no GO terms
WP_003103819.1	MULTISPECIES: ferrous iron transporter A [Pseudomonas]	36	3	8	3	8.2	166	3	0	3	Yes	-1.14125	0.172624		2.58161	7.51138e-06	Up	4.29372	4.16767e-07	Up	2.80503	0.00582702	Higher	PA4359		conserved hypothetical protein	PA4359	-1.06557	0.676704	P	P:GO:0006974; P:GO:0098711; F:GO:0046914	P:cellular response to DNA damage stimulus; P:iron ion import across plasma membrane; F:transition metal ion binding			IPR007167 (PFAM); IPR038157 (G3DSA:2.30.30.GENE3D); PTHR42954:SF2 (PANTHER); PTHR42954 (PANTHER); IPR008988 (SUPERFAMILY)	F:GO:0046914	F:transition metal ion binding
WP_003105448.1	MULTISPECIES: ABC transporter permease subunit [Pseudomonas]	9	3	5	3	37	109	3	0	3	Yes	-1.11334	0.537393		1.81171	0.0051309	Up	4.24685	0.000199462	Up										EP	P:GO:0055085; C:GO:0005886; C:GO:0016021	P:transmembrane transport; C:plasma membrane; C:integral component of membrane			IPR035906 (G3DSA:1.10.3720.GENE3D); IPR045621 (PFAM); IPR000515 (PFAM); PTHR43163 (PANTHER); IPR000515 (PROSITE_PROFILES); IPR000515 (CDD); IPR035906 (SUPERFAMILY)	P:GO:0055085; C:GO:0016020	P:transmembrane transport; C:membrane
WP_003098460.1	MULTISPECIES: glycerol-3-phosphate dehydrogenase [Pseudomonas]	30	14	23	14	57.1	473	14	0	14	Yes	1.05708	0.668626		2.47277	0.00134124	Up	4.14553	0.00021075	Up	1.12335	0.442047		PA3584	glpD	glycerol-3-phosphate dehydrogenase	glpD	-1.50972	0.0281167	C	P:GO:0006071; P:GO:0022900; P:GO:0046168; F:GO:0009055; F:GO:0052591; F:GO:0071949; C:GO:0005887; C:GO:0009331	P:glycerol metabolic process; P:electron transport chain; P:glycerol-3-phosphate catabolic process; F:electron transfer activity; F:sn-glycerol-3-phosphate:ubiquinone-8 oxidoreductase activity; F:FAD binding; C:integral component of plasma membrane; C:glycerol-3-phosphate dehydrogenase complex	EC:1.1.5.3	Glycerol-3-phosphate dehydrogenase	IPR000447 (PRINTS); IPR031656 (PFAM); G3DSA:6.10.250.1890 (GENE3D); IPR038299 (G3DSA:1.10.8.GENE3D); G3DSA:3.30.9.10 (GENE3D); IPR036188 (G3DSA:3.50.50.GENE3D); IPR006076 (PFAM); PTHR11985:SF15 (PANTHER); IPR000447 (PANTHER); PS00978 (PROSITE_PATTERNS); IPR000447 (PROSITE_PATTERNS); IPR036188 (SUPERFAMILY)	P:GO:0006072; F:GO:0004368; F:GO:0016491; C:GO:0009331	P:glycerol-3-phosphate metabolic process; F:glycerol-3-phosphate dehydrogenase (quinone) activity; F:oxidoreductase activity; C:glycerol-3-phosphate dehydrogenase complex
WP_003088087.1	MULTISPECIES: hypothetical protein [Pseudomonas]	57	2	3	2	7.3	46	2	0	2	Yes	-1.06373	0.738069		1.79595	0.0169685	Up	4.11622	0.000320647	Up	0.908347	0.546423		PA1866a		hypothetical protein	PA1866a	-1.64514	2.08e-07						mobidb-lite (MOBIDB_LITE); mobidb-lite (MOBIDB_LITE)	no GO terms	no GO terms
WP_003108612.1	MULTISPECIES: hypothetical protein [Pseudomonas]	22	6	27	6	38.2	693	6	0	6	Yes	-1.0889	0.0643608		1.75988	2.68969e-07	Up	4.08936	6.27937e-09	Up	1.99679	2.99472e-05	Higher	PA0998	pqsC	PqsC	pqsC	1.39966	0.0147782	I	P:GO:0006633; P:GO:0044550; F:GO:0004315; F:GO:0033818; C:GO:0005737	P:fatty acid biosynthetic process; P:secondary metabolite biosynthetic process; F:3-oxoacyl-[acyl-carrier-protein] synthase activity; F:beta-ketoacyl-acyl-carrier-protein synthase III activity; C:cytoplasm	EC:2.3.1.41; EC:2.3.1.85; EC:2.3.1.180	Beta-ketoacyl-[acyl-carrier-protein] synthase I; Fatty-acid synthase system; Beta-ketoacyl-[acyl-carrier-protein] synthase III	IPR013747 (PFAM); IPR016039 (G3DSA:3.40.47.GENE3D); IPR013751 (PFAM); IPR016039 (G3DSA:3.40.47.GENE3D); PTHR34069 (PANTHER); PTHR34069:SF2 (PANTHER); IPR016039 (SUPERFAMILY)	P:GO:0006633; F:GO:0004315; F:GO:0016746	P:fatty acid biosynthetic process; F:3-oxoacyl-[acyl-carrier-protein] synthase activity; F:acyltransferase activity
WP_003122839.1	MULTISPECIES: tRNA-(ms[2]io[6]A)-hydroxylase [Pseudomonas]	32	6	9	6	23.3	253	6	0	6	Yes	-1.04043	0.73242		1.6859	0.00218389	Up	4.08213	6.45183e-05	Up	1.53411	0.0938684		PA1790		hypothetical protein	PA1790	-1.54512	0.00556321	FJ	P:GO:0002195; F:GO:0045301	P:2-methylthio-N-6-(cis-hydroxy)isopentenyl adenosine-tRNA biosynthesis; F:tRNA-(2-methylthio-N-6-(cis-hydroxy)isopentenyl adenosine)-hydroxylase activity	EC:1	Oxidoreductases	IPR010386 (PIRSF); IPR010386 (PFAM); IPR012347 (G3DSA:1.20.1260.GENE3D); IPR010386 (PANTHER); IPR010386 (CDD); IPR009078 (SUPERFAMILY)	P:GO:0006400; F:GO:0045301	P:tRNA modification; F:tRNA-(2-methylthio-N-6-(cis-hydroxy)isopentenyl adenosine)-hydroxylase activity
WP_003119293.1	MULTISPECIES: 2-isopropylmalate synthase [Pseudomonas]	41	18	53	18	65.8	1630	18	0	18	Yes	-1.05862	0.371174		2.01609	0.000265915	Up	4.04165	7.00278e-06	Up	1.06556	0.251368		PA3792	leuA	2-isopropylmalate synthase	leuA	1.35709	0.0391418	E	P:GO:0009098; F:GO:0003852	P:leucine biosynthetic process; F:2-isopropylmalate synthase activity	EC:2.3.3.13	2-isopropylmalate synthase	Coil (COILS); IPR013709 (PFAM); IPR036230 (G3DSA:3.30.160.GENE3D); IPR013785 (G3DSA:3.20.20.GENE3D); IPR005668 (TIGRFAM); IPR000891 (PFAM); PTHR46911 (PANTHER); PTHR46911:SF1 (PANTHER); IPR002034 (PROSITE_PATTERNS); IPR002034 (PROSITE_PATTERNS); IPR005668 (HAMAP); IPR000891 (PROSITE_PROFILES); IPR039371 (CDD); SSF89000 (SUPERFAMILY); SSF51569 (SUPERFAMILY); IPR036230 (SUPERFAMILY)	P:GO:0009098; P:GO:0019752; F:GO:0003824; F:GO:0003852; F:GO:0046912	P:leucine biosynthetic process; P:carboxylic acid metabolic process; F:catalytic activity; F:2-isopropylmalate synthase activity; F:acyltransferase, acyl groups converted into alkyl on transfer
WP_014602970.1	MULTISPECIES: LamB/YcsF family protein [Pseudomonas]	42	7	21	7	26.3	752	7	0	7	Yes	1.02753	0.644538		1.74912	0.000484055	Up	3.99882	4.26465e-06	Up	2.14599	0.000365043	Higher	PA2112		conserved hypothetical protein	PA2112	1.17439	0.122543	S	P:GO:0005975; F:GO:0005524; F:GO:0017168	P:carbohydrate metabolic process; F:ATP binding; F:5-oxoprolinase (ATP-hydrolyzing) activity	EC:3.5.2.9	5-oxoprolinase (ATP-hydrolyzing)	G3DSA:3.20.20.370 (GENE3D); IPR005501 (PFAM); IPR005501 (PANTHER); IPR005501 (HAMAP); cd10787 (CDD); IPR011330 (SUPERFAMILY)	P:GO:0005975; F:GO:0003824	P:carbohydrate metabolic process; F:catalytic activity
WP_003087762.1	MULTISPECIES: N-acetyltransferase [Pseudomonas]	59	5	14	5	10.6	412	5	0	5	Yes	-1.02898	0.316622		1.67764	4.37583e-05	Up	3.96837	2.65034e-06	Up										S	F:GO:0016740	F:transferase activity	EC:2	Transferases	G3DSA:3.40.630.30 (GENE3D); IPR031165 (PFAM); IPR045057 (PANTHER); PTHR31435:SF9 (PANTHER); IPR031165 (PROSITE_PROFILES); cd04301 (CDD); IPR016181 (SUPERFAMILY)	no GO terms	no GO terms
WP_003452470.1	MULTISPECIES: alpha/beta fold hydrolase [Pseudomonas]	34	7	12	7	34.8	345	7	0	7	Yes	-1.06841	0.32987		3.18193	2.57457e-06	Up	3.92819	7.89568e-07	Up	-2.54039	1.07669e-05	Lower	PA2949		esterase	PA2949	-1.00367	0.975747	I	F:GO:0004806	F:triglyceride lipase activity	EC:3.1.1.1; EC:3.1.1.3	Carboxylesterase; Triacylglycerol lipase	IPR000073 (PRINTS); IPR000639 (PRINTS); IPR029058 (G3DSA:3.40.50.GENE3D); IPR000073 (PFAM); PTHR46438 (PANTHER); PTHR46438:SF2 (PANTHER); PTHR46438 (PANTHER); PTHR46438:SF2 (PANTHER); IPR029058 (SUPERFAMILY)	F:GO:0003824	F:catalytic activity
WP_003084667.1	MULTISPECIES: NAD(P)-dependent oxidoreductase [Pseudomonas]	56	19	81	19	48.9	2443	19	0	19	Yes	-1.03591	0.0955414		2.77778	1.69969e-07	Up	3.856	4.40529e-11	Up	2.35602	0.000157003	Higher	PA0440		probable oxidoreductase	PA0440	-1.25034	0.296918	C	F:GO:0016491; F:GO:0051536	F:oxidoreductase activity; F:iron-sulfur cluster binding	EC:1	Oxidoreductases	PR00469 (PRINTS); PR00368 (PRINTS); IPR028261 (PFAM); IPR023753 (PFAM); IPR036188 (G3DSA:3.50.50.GENE3D); IPR009051 (G3DSA:1.10.1060.GENE3D); PTHR11938 (PANTHER); PTHR11938:SF135 (PANTHER); SSF46548 (SUPERFAMILY); SSF51971 (SUPERFAMILY)	F:GO:0016491; F:GO:0051536	F:oxidoreductase activity; F:iron-sulfur cluster binding
WP_003086547.1	MULTISPECIES: ribonucleotide-diphosphate reductase subunit beta [Pseudomonas]	22	7	23	7	47.4	860	7	0	7	Yes	1.05194	0.442323		1.4023	0.00120617		3.82929	1.54371e-06	Up	1.08851	0.43779		PA1155	nrdB	NrdB, tyrosyl radical-harboring component of class Ia ribonucleotide reductase	nrdB	1.77225	0.0269187	F	P:GO:0006260; P:GO:0009263; F:GO:0004748; F:GO:0046872; C:GO:0016021	P:DNA replication; P:deoxyribonucleotide biosynthetic process; F:ribonucleoside-diphosphate reductase activity, thioredoxin disulfide as acceptor; F:metal ion binding; C:integral component of membrane	EC:1.17.4.1	Ribonucleoside-diphosphate reductase	IPR012348 (G3DSA:1.10.620.GENE3D); IPR000358 (PIRSF); IPR000358 (PFAM); mobidb-lite (MOBIDB_LITE); mobidb-lite (MOBIDB_LITE); mobidb-lite (MOBIDB_LITE); IPR000358 (PANTHER); PTHR23409:SF18 (PANTHER); IPR033909 (CDD); IPR009078 (SUPERFAMILY)	P:GO:0009263; F:GO:0016491	P:deoxyribonucleotide biosynthetic process; F:oxidoreductase activity
WP_003116242.1	MULTISPECIES: sel1 repeat family protein [Pseudomonas]	6	2	5	2	29.6	106	2	0	2	Yes	-1.07967	0.485258		1.19234	0.118577		3.76815	0.000162823	Up				PA4516		hypothetical protein	PA4516	1.13134	0.171585	S	F:GO:0005515	F:protein binding			IPR011990 (G3DSA:1.25.40.GENE3D); IPR006597 (PFAM); PTHR43628 (PANTHER); PTHR43628 (PANTHER); PTHR43628:SF9 (PANTHER); PTHR43628:SF9 (PANTHER); SSF81901 (SUPERFAMILY)	F:GO:0005515	F:protein binding
WP_110183933.1	GMC family oxidoreductase [Pseudomonas aeruginosa]	18	11	18	11	64.6	365	11	0	11	Yes	-1.06845	0.271768		2.7948	1.06006e-06	Up	3.76344	1.15992e-07	Up	1.09573	0.0695511		PA2265		gluconate dehydrogenase	PA2265	-1.09986	0.533403	E	F:GO:0033717; F:GO:0050660	F:gluconate 2-dehydrogenase (acceptor) activity; F:flavin adenine dinucleotide binding	EC:1.1.1; EC:1.1.99.3	Acting on the CH-OH group of donors; Gluconate 2-dehydrogenase (acceptor)	IPR036188 (G3DSA:3.50.50.GENE3D); IPR036188 (G3DSA:3.50.50.GENE3D); IPR007867 (PFAM); IPR000172 (PFAM); PTHR46056 (PANTHER); PTHR46056:SF4 (PANTHER); SSF54373 (SUPERFAMILY); IPR036188 (SUPERFAMILY)	F:GO:0016614; F:GO:0050660	F:oxidoreductase activity, acting on CH-OH group of donors; F:flavin adenine dinucleotide binding
WP_023835736.1	metal ABC transporter substrate-binding protein [Pseudomonas aeruginosa]	32	8	17	8	31.7	453	8	0	8	Yes	1.00167	0.971022		3.06015	5.16085e-06	Up	3.71178	1.94437e-05	Up	-9.29741	6.21471e-07	Lower	PA2410	fpvF	FpvF	PA2410	1.62541	0.0102822	P	P:GO:0030001; F:GO:0046872; C:GO:0005618	P:metal ion transport; F:metal ion binding; C:cell wall			IPR006127 (PFAM); G3DSA:3.40.50.1980 (GENE3D); PTHR42953:SF4 (PANTHER); PTHR42953 (PANTHER); SSF53807 (SUPERFAMILY)	P:GO:0030001; F:GO:0046872	P:metal ion transport; F:metal ion binding
WP_003103238.1	MULTISPECIES: ribosome modulation factor [Pseudomonas]	59	4	5	4	8.1	216	4	0	4	Yes	1.18529	0.48337		4.30673	0.00226446	Up	3.57183	0.00414899	Up	-2.58709	0.0144422	Lower	PA3049	rmf	ribosome modulation factor	rmf	1.51978	0.0565408	J	P:GO:0006417; C:GO:0005737	P:regulation of translation; C:cytoplasm			IPR007040 (PFAM); IPR023200 (G3DSA:1.10.10.GENE3D); IPR007040 (HAMAP)	no GO terms	no GO terms
WP_003087920.1	MULTISPECIES: trigger factor [Pseudomonas]	55	20	122	20	48.6	3821	20	0	20	Yes	1.00683	0.778306		2.15581	8.79891e-06	Up	3.54169	2.27024e-06	Up	1.07335	0.153528		PA1800	tig	trigger factor	tig	1.05238	0.514255	D	P:GO:0000413; P:GO:0007049; P:GO:0009408; P:GO:0015031; P:GO:0043335; P:GO:0051083; P:GO:0051301; P:GO:0061077; F:GO:0003755; F:GO:0042802; F:GO:0043022; F:GO:0044183; C:GO:0005829	P:protein peptidyl-prolyl isomerization; P:cell cycle; P:response to heat; P:protein transport; P:protein unfolding; P:'de novo' cotranslational protein folding; P:cell division; P:chaperone-mediated protein folding; F:peptidyl-prolyl cis-trans isomerase activity; F:identical protein binding; F:ribosome binding; F:protein folding chaperone; C:cytosol	EC:5.2.1.8	Peptidylprolyl isomerase	IPR005215 (TIGRFAM); IPR005215 (PIRSF); IPR001179 (PFAM); IPR036611 (G3DSA:3.30.70.GENE3D); G3DSA:3.10.50.40 (GENE3D); IPR008881 (PFAM); IPR008880 (PFAM); IPR037041 (G3DSA:1.10.3120.GENE3D); PTHR30560:SF3 (PANTHER); IPR005215 (PANTHER); IPR001179 (PROSITE_PROFILES); IPR005215 (HAMAP); IPR036611 (SUPERFAMILY); IPR027304 (SUPERFAMILY); SSF54534 (SUPERFAMILY)	P:GO:0006457; P:GO:0015031; F:GO:0003755	P:protein folding; P:protein transport; F:peptidyl-prolyl cis-trans isomerase activity
WP_003112765.1	MULTISPECIES: insulin-cleaving metalloproteinase outer membrane protein [Pseudomonas]	38	16	56	16	47.2	1317	16	0	16	Yes	-1.11143	0.0255092		1.65596	2.75843e-07	Up	3.54027	8.91262e-10	Up	1.08006	0.0759645		PA4370	icmP	Insulin-cleaving metalloproteinase outer membrane protein precursor	icmP	1.42666	0.000443582	P					IPR018976 (PFAM); IPR038352 (G3DSA:1.20.1420.GENE3D); PS51257 (PROSITE_PROFILES); cd14657 (CDD)	no GO terms	no GO terms
WP_023465127.1	PhoH family protein [Pseudomonas aeruginosa]	42	11	33	11	38.4	1282	11	0	11	Yes	-1.03171	0.289145		1.49616	0.000358947	Up	3.51233	1.13306e-08	Up	1.58424	0.000278001	Higher	PA3981		conserved hypothetical protein	PA3981	-1.07017	0.524143	T	F:GO:0005524; C:GO:0005829	F:ATP binding; C:cytosol			IPR003714 (PFAM); IPR027417 (G3DSA:3.40.50.GENE3D); mobidb-lite (MOBIDB_LITE); PTHR30473 (PANTHER); PTHR30473:SF1 (PANTHER); IPR027417 (SUPERFAMILY)	F:GO:0005524	F:ATP binding
WP_003089344.1	MULTISPECIES: glucose/quinate/shikimate family membrane-bound PQQ-dependent dehydrogenase [Pseudomonas]	32	17	35	17	86.2	1253	17	0	17	Yes	-1.21047	2.59753e-05		2.68049	6.15755e-08	Up	3.45852	4.51977e-10	Up	1.49769	0.000349835	Higher	PA2290	gcd	glucose dehydrogenase	gcd	1.83709	3.7e-05	G	F:GO:0008876; F:GO:0048038; C:GO:0016021	F:quinoprotein glucose dehydrogenase activity; F:quinone binding; C:integral component of membrane	EC:1.1.5.2; EC:1.1.99.10	Quinoprotein glucose dehydrogenase (PQQ, quinone); Acting on the CH-OH group of donors	IPR002372 (PFAM); G3DSA:2.140.10.10 (GENE3D); G3DSA:2.140.10.10 (GENE3D); IPR017511 (TIGRFAM); IPR002372 (PFAM); PTHR32303 (PANTHER); IPR017511 (PTHR32303:PANTHER); IPR017511 (CDD); IPR011047 (SUPERFAMILY)	F:GO:0016614; F:GO:0048038; C:GO:0016021	F:oxidoreductase activity, acting on CH-OH group of donors; F:quinone binding; C:integral component of membrane
WP_019395982.1	MULTISPECIES: hypothetical protein [Pseudomonas]	16	2	3	2	12.4	71	2	0	2	Yes	-1.08553	0.779951		1.04924	0.958273		3.42803	0.0148382	Up	0.933852	0.846907		PA5406		hypothetical protein	PA5406	-1.0256	0.809615						Coil (COILS)	no GO terms	no GO terms
WP_003104055.1	MULTISPECIES: PilZ domain-containing protein [Pseudomonas]	33	2	4	2	11	234	2	0	2	Yes	-1.14266	0.103384		2.25275	3.72734e-05	Up	3.40514	0.000149472	Up	2.24451	0.030421	Higher	PA2799		hypothetical protein	PA2799	1.26855	0.053565	S	F:GO:0035438	F:cyclic-di-GMP binding			IPR009875 (PFAM); G3DSA:2.40.10.220 (GENE3D); SSF141371 (SUPERFAMILY)	F:GO:0035438	F:cyclic-di-GMP binding
WP_003085861.1	MULTISPECIES: rhodanese-related sulfurtransferase [Pseudomonas]	12	4	6	4	35.4	71	4	0	4	Yes	1.1207	0.135854		1.25032	0.0177976		3.39992	0.00293905	Up	1.14557	0.192407		PA0858		conserved hypothetical protein	PA0858	-1.26661	0.0113172	S	F:GO:0016740	F:transferase activity	EC:2	Transferases	G3DSA:3.30.70.100 (GENE3D); IPR036873 (G3DSA:3.40.250.GENE3D); IPR001763 (PFAM); IPR040503 (PFAM); mobidb-lite (MOBIDB_LITE); mobidb-lite (MOBIDB_LITE); IPR020936 (PANTHER); IPR020936 (HAMAP); IPR001763 (PROSITE_PROFILES); cd01518 (CDD); IPR036873 (SUPERFAMILY)	no GO terms	no GO terms
WP_003085321.1	MULTISPECIES: biliverdin-producing heme oxygenase [Pseudomonas]	29	5	11	5	21.9	258	5	0	5	Yes	-1.13127	0.0613004		1.01179	0.985829		3.31226	6.65378e-07	Up	-3.21321	3.78246e-05	Lower	PA0672	hemO	heme oxygenase	hemO	1.02806	0.790454	P	P:GO:0006788; P:GO:0071281; F:GO:0004392; F:GO:0046872	P:heme oxidation; P:cellular response to iron ion; F:heme oxygenase (decyclizing) activity; F:metal ion binding	EC:1.14.14.18	Heme oxygenase (biliverdin-producing)	IPR016084 (G3DSA:1.20.910.GENE3D); IPR016053 (PFAM); cd00232 (CDD); IPR016084 (SUPERFAMILY)	P:GO:0006788; F:GO:0004392	P:heme oxidation; F:heme oxygenase (decyclizing) activity
WP_003114229.1	MULTISPECIES: thioredoxin-disulfide reductase [Pseudomonas]	18	3	8	3	33.5	259	3	0	3	Yes	1.00911	0.739448		1.88005	0.000186937	Up	3.27237	5.27209e-08	Up	1.15554	0.0451006		PA0849	trxB2	thioredoxin reductase 2	trxB2	1.04452	0.639265	C	P:GO:0019430; F:GO:0004791; F:GO:0016829; C:GO:0005737	P:removal of superoxide radicals; F:thioredoxin-disulfide reductase activity; F:lyase activity; C:cytoplasm	EC:4; EC:1.8.1.9; EC:1.8.1.8	Lyases; Thioredoxin-disulfide reductase; Protein-disulfide reductase	PR00469 (PRINTS); PR00368 (PRINTS); IPR005982 (TIGRFAM); IPR036188 (G3DSA:3.50.50.GENE3D); IPR036188 (G3DSA:3.50.50.GENE3D); IPR023753 (PFAM); PTHR48105:SF16 (PANTHER); PTHR48105 (PANTHER); IPR008255 (PROSITE_PATTERNS); IPR036188 (SUPERFAMILY)	P:GO:0019430; F:GO:0004791; F:GO:0016491; C:GO:0005737	P:removal of superoxide radicals; F:thioredoxin-disulfide reductase activity; F:oxidoreductase activity; C:cytoplasm
WP_003113122.1	MULTISPECIES: phosphonate C-P lyase system protein PhnH [Pseudomonas]	20	4	7	4	22.2	219	4	0	4	Yes	-1.05994	0.390402		1.03758	0.479513		3.26941	9.40108e-06	Up	1.58343	0.0102764	Higher	PA3379		conserved hypothetical protein	PA3379	-1.10029	0.753512	P	P:GO:0019700; F:GO:0016829; F:GO:0042802; F:GO:0061693; C:GO:0061694; C:GO:1904176	P:organic phosphonate catabolic process; F:lyase activity; F:identical protein binding; F:alpha-D-ribose 1-methylphosphonate 5-triphosphate synthase activity; C:alpha-D-ribose 1-methylphosphonate 5-triphosphate synthase complex; C:carbon phosphorus lyase complex	EC:4; EC:2.7.8.37	Lyases; Alpha-D-ribose 1-methylphosphonate 5-triphosphate synthase	IPR008772 (PFAM); IPR038058 (G3DSA:3.40.50.GENE3D); IPR008772 (TIGRFAM); IPR008772 (PIRSF); IPR038058 (SUPERFAMILY)	P:GO:0019634	P:organic phosphonate metabolic process
WP_023085630.1	DUF2063 domain-containing protein [Pseudomonas aeruginosa]	36	8	14	8	28.7	332	8	0	8	Yes	-1.01967	0.679292		1.24518	0.00466102		3.24147	0.000700801	Up	1.19187	0.367321		PA4105		hypothetical protein	PA4105	1.31969	0.0518778	S					IPR044922 (G3DSA:1.10.150.GENE3D); IPR018640 (PFAM); G3DSA:3.90.930.50 (GENE3D)	no GO terms	no GO terms
WP_003111679.1	MULTISPECIES: pyrroloquinoline quinone biosynthesis protein C [Pseudomonas]	21	5	7	5	29.4	256	5	0	5	Yes	-1.1082	0.190099		2.20648	4.6359e-05	Up	3.19485	8.58711e-05	Up	1.00125	0.980911		PA1987	pqqC	pyrroloquinoline quinone biosynthesis protein C	pqqC	1.46712	0.00822345	H	P:GO:0018189; F:GO:0033732	P:pyrroloquinoline quinone biosynthetic process; F:pyrroloquinoline-quinone synthase activity	EC:1.3.3.11	Pyrroloquinoline-quinone synthase	IPR016084 (G3DSA:1.20.910.GENE3D); IPR004305 (PFAM); IPR011845 (TIGRFAM); IPR039068 (PANTHER); IPR011845 (HAMAP); cd19370 (CDD); IPR016084 (SUPERFAMILY)	P:GO:0018189	P:pyrroloquinoline quinone biosynthetic process
WP_003158204.1	MULTISPECIES: flagellar hook-associated protein FlgK [Pseudomonas]	21	11	28	11	71.4	964	11	0	11	Yes	1.02366	0.358756		1.77271	8.71839e-06	Up	3.1635	2.23456e-06	Up										N	P:GO:0044780; F:GO:0005198; C:GO:0009424	P:bacterial-type flagellum assembly; F:structural molecule activity; C:bacterial-type flagellum hook			IPR002371 (PRINTS); IPR002371 (TIGRFAM); IPR010930 (PFAM); mobidb-lite (MOBIDB_LITE); mobidb-lite (MOBIDB_LITE); IPR002371 (PANTHER); SSF64518 (SUPERFAMILY); SSF64518 (SUPERFAMILY)	P:GO:0044780; F:GO:0005198; C:GO:0009424	P:bacterial-type flagellum assembly; F:structural molecule activity; C:bacterial-type flagellum hook
WP_003158164.1	MULTISPECIES: hypothetical protein [Pseudomonas]	40	3	9	3	10.1	297	3	0	3	Yes	-1.11443	0.327493		1.46619	0.0109541		3.15957	0.000675674	Up															mobidb-lite (MOBIDB_LITE)	no GO terms	no GO terms
WP_003111532.1	MULTISPECIES: nitrite reductase [Pseudomonas]	4	2	3	2	62.6	148	2	0	2	Yes	-1.61538	0.00480078	Down	1.94315	0.000115319	Up	3.15836	1.90582e-05	Up	1.70699	0.000117922	Higher	PA0519	nirS	nitrite reductase precursor	nirS	1.15612	0.456732	C	P:GO:0022900; F:GO:0009055; F:GO:0020037; F:GO:0046872; F:GO:0050418; F:GO:0050421; C:GO:0042597	P:electron transport chain; F:electron transfer activity; F:heme binding; F:metal ion binding; F:hydroxylamine reductase activity; F:nitrite reductase (NO-forming) activity; C:periplasmic space	EC:1.7.99.1; EC:1.7.2.1	Hydroxylamine reductase; Nitrite reductase (NO-forming)	IPR009056 (PFAM); IPR003143 (G3DSA:2.140.10.GENE3D); IPR036909 (G3DSA:1.10.760.GENE3D); PF02239 (PFAM); IPR009056 (PROSITE_PROFILES); IPR036909 (SUPERFAMILY); IPR011048 (SUPERFAMILY)	F:GO:0009055; F:GO:0020037	F:electron transfer activity; F:heme binding
WP_003117510.1	MULTISPECIES: UDP-glucose/GDP-mannose dehydrogenase family protein [Pseudomonas]	28	14	31	14	51.7	762	14	0	14	Yes	1.0152	0.73232		1.68693	0.000238235	Up	3.15653	1.79946e-06	Up	1.79536	3.36887e-05	Higher	PA3559		probable nucleotide sugar dehydrogenase	PA3559	1.90319	0.000277977	M	P:GO:0000271; F:GO:0003979; F:GO:0051287	P:polysaccharide biosynthetic process; F:UDP-glucose 6-dehydrogenase activity; F:NAD binding	EC:1.1.1.22	UDP-glucose 6-dehydrogenase	G3DSA:1.20.5.100 (GENE3D); IPR001732 (PFAM); IPR014027 (PFAM); G3DSA:3.40.50.720 (GENE3D); G3DSA:3.40.50.720 (GENE3D); IPR014026 (PFAM); IPR017476 (PIRSF); IPR017476 (TIGRFAM); IPR028357 (PIRSF); PTHR43750:SF3 (PANTHER); PTHR43750 (PANTHER); IPR008927 (SUPERFAMILY); IPR036220 (SUPERFAMILY); IPR036291 (SUPERFAMILY)	P:GO:0000271; F:GO:0003979; F:GO:0016616; F:GO:0051287	P:polysaccharide biosynthetic process; F:UDP-glucose 6-dehydrogenase activity; F:oxidoreductase activity, acting on the CH-OH group of donors, NAD or NADP as acceptor; F:NAD binding
WP_016852239.1	MULTISPECIES: RNA-binding transcriptional accessory protein [Pseudomonas]	43	29	70	29	85	1827	29	0	29	Yes	1.09526	0.000749943		1.58111	6.66669e-05	Up	3.15557	6.19574e-09	Up	0.914764	0.0675941		PA5201		conserved hypothetical protein	PA5201	-1.08449	0.33293	K	P:GO:0006139; P:GO:0006412; P:GO:0010212; F:GO:0003729; F:GO:0003735; C:GO:0005829	P:nucleobase-containing compound metabolic process; P:translation; P:response to ionizing radiation; F:mRNA binding; F:structural constituent of ribosome; C:cytosol			Coil (COILS); IPR003029 (PFAM); G3DSA:2.40.50.140 (GENE3D); IPR023323 (G3DSA:1.10.3500.GENE3D); PF12836 (PFAM); IPR018974 (PFAM); IPR041692 (PFAM); IPR037027 (G3DSA:3.30.420.GENE3D); IPR023319 (G3DSA:1.10.10.GENE3D); IPR032639 (PFAM); G3DSA:1.10.150.310 (GENE3D); mobidb-lite (MOBIDB_LITE); PTHR10724:SF10 (PANTHER); PTHR10724 (PANTHER); IPR003029 (PROSITE_PROFILES); IPR044146 (CDD); IPR012340 (SUP…	P:GO:0006139; F:GO:0003676	P:nucleobase-containing compound metabolic process; F:nucleic acid binding
WP_023465432.1	tRNA uridine-5-carboxymethylaminomethyl(34) synthesis enzyme MnmG [Pseudomonas aeruginosa]	8	4	10	4	69.7	199	4	0	4	Yes	1.00732	0.883008		-1.06327	0.241171		3.14892	8.65637e-07	Up	0.933352	0.299446		PA5565	gidA	glucose-inhibited division protein A	gidA	-1.71396	2.56e-06	D	P:GO:0002098; P:GO:0009411; P:GO:0030488; F:GO:0050660; C:GO:0005829	P:tRNA wobble uridine modification; P:response to UV; P:tRNA methylation; F:flavin adenine dinucleotide binding; C:cytosol			IPR040131 (PFAM); IPR026904 (PFAM); IPR036188 (G3DSA:3.50.50.GENE3D); IPR044920 (G3DSA:1.10.150.GENE3D); G3DSA:1.10.10.1800 (GENE3D); IPR004416 (TIGRFAM); IPR002218 (PANTHER); IPR004416 (PTHR11806:PANTHER); IPR020595 (PROSITE_PATTERNS); IPR020595 (PROSITE_PATTERNS); IPR004416 (HAMAP); IPR036188 (SUPERFAMILY)	P:GO:0002098; P:GO:0008033; F:GO:0050660	P:tRNA wobble uridine modification; P:tRNA processing; F:flavin adenine dinucleotide binding
WP_003121116.1	MULTISPECIES: DNA-binding transcriptional regulator Fis [Pseudomonas]	42	3	5	3	11.9	164	3	0	3	Yes	1.03002	0.979029		1.61018	0.00317542	Up	3.1402	6.40146e-05	Up	1.3004	0.04844		PA4853	fis	DNA-binding protein Fis	fis	-1.35287	0.0352333	K	P:GO:0009314; P:GO:0010628; P:GO:0010629; P:GO:0032359; P:GO:0044403; P:GO:0045892; P:GO:0045893; P:GO:0045911; F:GO:0001046; F:GO:0001216; F:GO:0001217; F:GO:0042803; F:GO:0044374; C:GO:0000786; C:GO:0005829; C:GO:0031421	P:response to radiation; P:positive regulation of gene expression; P:negative regulation of gene expression; P:provirus excision; P:biological process involved in symbiotic interaction; P:negative regulation of transcription, DNA-templated; P:positive regulation of transcription, DNA-templated; P:positive regulation of DNA recombination; F:core promoter sequence-specific DNA binding; F:DNA-bindin…			IPR005412 (PRINTS); IPR002197 (PRINTS); IPR005412 (PIRSF); IPR002197 (PFAM); G3DSA:1.10.10.60 (GENE3D); mobidb-lite (MOBIDB_LITE); PTHR47918 (PANTHER); IPR009057 (SUPERFAMILY)	P:GO:0006355; F:GO:0003677; F:GO:0043565	P:regulation of transcription, DNA-templated; F:DNA binding; F:sequence-specific DNA binding
WP_003082202.1	MULTISPECIES: sigma-54-dependent Fis family transcriptional regulator [Pseudomonas]	24	11	18	10	51.2	432	11	0	10	Yes	1.02012	0.495353		-1.15505	0.0913003		3.13701	1.14464e-07	Up	-1.08567	0.0360095		PA1099	fleR	two-component response regulator	fleR	-1.72658	0.000308862	T	P:GO:0000160; P:GO:0006355; P:GO:0045785; P:GO:1900191; P:GO:2000155; F:GO:0003700; F:GO:0005524; F:GO:0008134; F:GO:0043565	P:phosphorelay signal transduction system; P:regulation of transcription, DNA-templated; P:positive regulation of cell adhesion; P:negative regulation of single-species biofilm formation; P:positive regulation of cilium-dependent cell motility; F:DNA-binding transcription factor activity; F:ATP binding; F:transcription factor binding; F:sequence-specific DNA binding			IPR002197 (PRINTS); G3DSA:1.10.8.60 (GENE3D); IPR027417 (G3DSA:3.40.50.GENE3D); G3DSA:3.40.50.2300 (GENE3D); G3DSA:1.10.10.60 (GENE3D); IPR002078 (PFAM); IPR002197 (PFAM); IPR001789 (PFAM); mobidb-lite (MOBIDB_LITE); IPR029995 (PTHR32071:PANTHER); PTHR32071 (PANTHER); IPR025944 (PROSITE_PATTERNS); IPR025662 (PROSITE_PATTERNS); IPR025943 (PROSITE_PATTERNS); IPR002078 (PROSITE_PROFILES); IPR001789 …	P:GO:0000160; P:GO:0006355; F:GO:0005524; F:GO:0008134; F:GO:0043565	P:phosphorelay signal transduction system; P:regulation of transcription, DNA-templated; F:ATP binding; F:transcription factor binding; F:sequence-specific DNA binding
WP_023464375.1	flagellar hook-associated protein 3 [Pseudomonas aeruginosa]	11	4	4	4	46.9	118	4	0	4	Yes	-1.0988	0.25233		1.46877	0.00155611		3.13318	3.96633e-06	Up										N	P:GO:0071973; F:GO:0005198; C:GO:0009424	P:bacterial-type flagellum-dependent cell motility; F:structural molecule activity; C:bacterial-type flagellum hook			IPR001029 (PFAM); IPR001029 (PFAM); IPR013384 (TIGRFAM); G3DSA:1.20.1330.10 (GENE3D); G3DSA:1.20.1330.10 (GENE3D); PTHR42792 (PANTHER); PTHR42792:SF1 (PANTHER); SSF64518 (SUPERFAMILY)	P:GO:0071973; F:GO:0005198; C:GO:0009424	P:bacterial-type flagellum-dependent cell motility; F:structural molecule activity; C:bacterial-type flagellum hook
WP_003123161.1	MULTISPECIES: flagellar hook-associated protein [Pseudomonas]	69	28	58	28	50.7	1666	28	0	28	Yes	-1.0152	0.679728		1.86871	1.4959e-05	Up	3.12898	3.32955e-07	Up										N	P:GO:0007155; P:GO:0071978; C:GO:0005576; C:GO:0009421; C:GO:0009424	P:cell adhesion; P:bacterial-type flagellum-dependent swarming motility; C:extracellular region; C:bacterial-type flagellum filament cap; C:bacterial-type flagellum hook			Coil (COILS); IPR003481 (PFAM); IPR010810 (PFAM); IPR010809 (PFAM); IPR040026 (PANTHER)	P:GO:0007155; C:GO:0009288; C:GO:0009421; C:GO:0009424	P:cell adhesion; C:bacterial-type flagellum; C:bacterial-type flagellum filament cap; C:bacterial-type flagellum hook
WP_003098159.1	MULTISPECIES: hypothetical protein [Pseudomonas]	25	9	14	9	60.8	275	9	0	9	Yes	-1.02812	0.357114		1.47447	7.02316e-05		3.12546	2.67767e-08	Up	1.30821	0.00170916		PA1822	fimL	hypothetical protein	fimL	-1.04712	0.446572	T	P:GO:0000160	P:phosphorelay signal transduction system			Coil (COILS); PTHR43395 (PANTHER); PTHR43395:SF8 (PANTHER); PTHR43395:SF8 (PANTHER); PTHR43395 (PANTHER); PTHR43395 (PANTHER); IPR036641 (SUPERFAMILY)	P:GO:0000160	P:phosphorelay signal transduction system
WP_110184009.1	GGDEF domain-containing protein [Pseudomonas aeruginosa]	11	6	7	6	86.3	266	6	0	6	Yes	1.13564	0.583099		1.74113	0.0725292		3.09574	0.0101058	Up	-12.2527	0.00147819	Lower	PA0285		putative phosphodiesterase	PA0285	1.06718	0.324576	T	P:GO:0006355; F:GO:0005515; F:GO:0071111; C:GO:0016021	P:regulation of transcription, DNA-templated; F:protein binding; F:cyclic-guanylate-specific phosphodiesterase activity; C:integral component of membrane	EC:3.1.4.52	Cyclic-guanylate-specific phosphodiesterase	IPR013767 (PFAM); G3DSA:3.30.450.20 (GENE3D); G3DSA:3.30.450.20 (GENE3D); IPR001633 (PFAM); IPR013655 (PFAM); IPR000160 (PFAM); IPR043128 (G3DSA:3.30.70.GENE3D); IPR035919 (G3DSA:3.20.20.GENE3D); IPR000014 (TIGRFAM); IPR000160 (TIGRFAM); PTHR44757:SF2 (PANTHER); PTHR44757 (PANTHER); IPR000700 (PROSITE_PROFILES); IPR000160 (PROSITE_PROFILES); IPR001633 (PROSITE_PROFILES); IPR000014 (PROSITE_PROFIL…	P:GO:0006355; F:GO:0005515	P:regulation of transcription, DNA-templated; F:protein binding
WP_023464244.1	NAD-dependent dihydropyrimidine dehydrogenase subunit PreA [Pseudomonas aeruginosa]	38	12	54	12	46.2	1865	12	0	12	Yes	-1.04063	0.134397		2.34622	2.17013e-08	Up	3.07729	3.93909e-09	Up	3.10644	0.00146619	Higher	PA0439		probable oxidoreductase	PA0439	-1.3715	0.171436	CF	P:GO:0006210; P:GO:0006212; F:GO:0004159; C:GO:0005737	P:thymine catabolic process; P:uracil catabolic process; F:dihydropyrimidine dehydrogenase (NAD+) activity; C:cytoplasm	EC:1.3.1.1	Dihydrouracil dehydrogenase (NAD(+))	IPR013785 (G3DSA:3.20.20.GENE3D); G3DSA:3.30.70.20 (GENE3D); IPR005720 (PFAM); IPR005720 (TIGRFAM); PF14697 (PFAM); IPR044512 (PANTHER); IPR017900 (PROSITE_PATTERNS); IPR017896 (PROSITE_PROFILES); IPR017896 (PROSITE_PROFILES); cd02940 (CDD); SSF54862 (SUPERFAMILY); SSF51395 (SUPERFAMILY)	P:GO:0006210; P:GO:0006212; F:GO:0003824; F:GO:0016627; C:GO:0005737	P:thymine catabolic process; P:uracil catabolic process; F:catalytic activity; F:oxidoreductase activity, acting on the CH-CH group of donors; C:cytoplasm
WP_003082021.1	MULTISPECIES: hypothetical protein [Pseudomonas]	13	2	5	2	27.2	338	2	0	2	Yes	1.79992	0.290973		2.20239	0.0902345		3.01966	0.00437443	Up	0.4013	0.434448		PA1043		hypothetical protein	PA1043	1.01819	0.857245						mobidb-lite (MOBIDB_LITE); mobidb-lite (MOBIDB_LITE)	no GO terms	no GO terms
WP_003105977.1	MULTISPECIES: phenylalanine 4-monooxygenase [Pseudomonas]	26	6	14	6	30.3	415	6	0	6	Yes	1.05176	0.380995		1.31092	0.0117409		3.00034	6.31506e-06	Up	1.23342	0.146139		PA0872	phhA	phenylalanine-4-hydroxylase	phhA	-1.07022	0.779821	E	P:GO:0006559; F:GO:0004505; F:GO:0005506	P:L-phenylalanine catabolic process; F:phenylalanine 4-monooxygenase activity; F:iron ion binding	EC:1.14.16.1	Phenylalanine 4-monooxygenase	IPR019774 (PRINTS); IPR019774 (PFAM); IPR005960 (TIGRFAM); IPR036951 (G3DSA:1.10.800.GENE3D); IPR001273 (PANTHER); PTHR11473:SF24 (PANTHER); IPR018301 (PROSITE_PATTERNS); IPR019774 (PROSITE_PROFILES); IPR005960 (CDD); IPR036329 (SUPERFAMILY)	P:GO:0006559; P:GO:0009072; F:GO:0004497; F:GO:0004505; F:GO:0005506; F:GO:0016714	P:L-phenylalanine catabolic process; P:aromatic amino acid family metabolic process; F:monooxygenase activity; F:phenylalanine 4-monooxygenase activity; F:iron ion binding; F:oxidoreductase activity, acting on paired donors, with incorporation or reduction of molecular oxygen, reduced pteridine as one donor, and incorporation of one atom of oxygen
WP_023114823.1	MULTISPECIES: Fe(2+) transporter permease subunit FeoB [Pseudomonas]	18	13	27	13	82.4	864	13	0	13	Yes	-1.023	0.786177		1.67007	0.000550195	Up	2.97997	1.00644e-05	Up	1.45943	0.00680396		PA4358	feoB	FeoB	PA4358	1.22414	0.0130713	P	P:GO:0006974; P:GO:0034755; P:GO:0055072; F:GO:0003924; F:GO:0005525; F:GO:0015093; F:GO:0032550; F:GO:0042802; C:GO:0005886; C:GO:0016021	P:cellular response to DNA damage stimulus; P:iron ion transmembrane transport; P:iron ion homeostasis; F:GTPase activity; F:GTP binding; F:ferrous iron transmembrane transporter activity; F:purine ribonucleoside binding; F:identical protein binding; C:plasma membrane; C:integral component of membrane	EC:3.6.1; EC:7	Acting on acid anhydrides; Translocases	Coil (COILS); IPR011642 (PFAM); IPR011640 (PFAM); IPR027417 (G3DSA:3.40.50.GENE3D); IPR041069 (PFAM); IPR030389 (PFAM); G3DSA:1.10.287.1770 (GENE3D); IPR003373 (TIGRFAM); PTHR43185 (PANTHER); IPR030389 (PROSITE_PROFILES); IPR030389 (CDD); IPR027417 (SUPERFAMILY)	P:GO:0006826; F:GO:0005525; F:GO:0015093; C:GO:0016021	P:iron ion transport; F:GTP binding; F:ferrous iron transmembrane transporter activity; C:integral component of membrane
WP_003098580.1	MULTISPECIES: ribonuclease HII [Pseudomonas]	18	3	6	3	21.7	142	3	0	3	Yes	1.0103	0.810812		1.45135	2.73118e-05		2.95881	5.00737e-08	Up	1.71812	0.000378689	Higher	PA3642	rnhB	ribonuclease HII	rnhB	-1.9283	0.00209786	L	P:GO:0006298; P:GO:0043137; P:GO:0090502; F:GO:0003723; F:GO:0004523; F:GO:0030145; C:GO:0005737; C:GO:0032299	P:mismatch repair; P:DNA replication, removal of RNA primer; P:RNA phosphodiester bond hydrolysis, endonucleolytic; F:RNA binding; F:RNA-DNA hybrid ribonuclease activity; F:manganese ion binding; C:cytoplasm; C:ribonuclease H2 complex	EC:3.1.30; EC:3.1.26.4	Acting on ester bonds; Ribonuclease H	IPR024567 (PFAM); IPR036397 (G3DSA:3.30.420.GENE3D); IPR022898 (PTHR10954:PANTHER); IPR001352 (PANTHER); IPR022898 (HAMAP); IPR022898 (CDD); IPR012337 (SUPERFAMILY)	F:GO:0003676; F:GO:0003723; F:GO:0004523	F:nucleic acid binding; F:RNA binding; F:RNA-DNA hybrid ribonuclease activity
WP_010953422.1	MULTISPECIES: alkene reductase [Pseudomonas]	20	6	11	6	41.1	342	6	0	6	Yes	-1.03102	0.593261		1.30645	0.0137653		2.95378	1.57572e-07	Up										C	F:GO:0010181; F:GO:0016491	F:FMN binding; F:oxidoreductase activity	EC:1	Oxidoreductases	IPR001155 (PFAM); IPR013785 (G3DSA:3.20.20.GENE3D); PTHR22893:SF68 (PANTHER); IPR045247 (PANTHER); cd02933 (CDD); SSF51395 (SUPERFAMILY)	F:GO:0003824; F:GO:0010181; F:GO:0016491	F:catalytic activity; F:FMN binding; F:oxidoreductase activity
WP_003098700.1	MULTISPECIES: carbon-phosphorus lyase complex subunit PhnJ [Pseudomonas]	36	9	19	9	32.8	515	9	0	9	Yes	-1.12066	0.0378287		1.04665	0.386276		2.9361	4.93761e-06	Up	2.02983	3.76155e-06	Higher	PA3377		conserved hypothetical protein	PA3377	-1.10675	0.727672	H	P:GO:0019700; F:GO:0046872; F:GO:0051539; F:GO:0098848; C:GO:1904176	P:organic phosphonate catabolic process; F:metal ion binding; F:4 iron, 4 sulfur cluster binding; F:alpha-D-ribose 1-methylphosphonate 5-phosphate C-P-lyase activity; C:carbon phosphorus lyase complex	EC:4.7.1.1	Alpha-D-ribose 1-methylphosphonate 5-phosphate C-P-lyase	IPR010306 (PIRSF); IPR010306 (PFAM); IPR010306 (SFLD); SFLDS00033 (SFLD); SFLDG01115 (SFLD)	P:GO:0019700; F:GO:0016829; F:GO:0051539	P:organic phosphonate catabolic process; F:lyase activity; F:4 iron, 4 sulfur cluster binding
WP_012076855.1	MULTISPECIES: phage regulatory protein [Pseudomonas]	19	3	5	3	30.7	102	3	0	3	Yes	1.02078	0.743174		1.32902	0.0130132		2.92813	2.66365e-05	Up										S					IPR014054 (PFAM); IPR014054 (TIGRFAM)	no GO terms	no GO terms
WP_003119196.1	MULTISPECIES: lipoyl synthase [Pseudomonas]	41	10	19	10	36.7	350	10	0	10	Yes	1.01976	0.659785		1.44566	0.000134993		2.91218	3.75271e-05	Up	-1.34138	0.0348859		PA3996	lis	lipoate synthase	lis	1.3999	0.0277388	H	P:GO:0009107; P:GO:0009249; F:GO:0016992; F:GO:0046872; F:GO:0051539; F:GO:1904047; C:GO:0005829	P:lipoate biosynthetic process; P:protein lipoylation; F:lipoate synthase activity; F:metal ion binding; F:4 iron, 4 sulfur cluster binding; F:S-adenosyl-L-methionine binding; C:cytosol	EC:2.8.1.8	Lipoyl synthase	IPR007197 (PFAM); IPR013785 (G3DSA:3.20.20.GENE3D); IPR003698 (TIGRFAM); IPR003698 (PIRSF); IPR031691 (PFAM); IPR007197 (SFLD); IPR003698 (SFLD); IPR003698 (PANTHER); PTHR10949:SF0 (PANTHER); IPR003698 (HAMAP); IPR007197 (PROSITE_PROFILES); cd01335 (CDD); SSF102114 (SUPERFAMILY)	P:GO:0009107; F:GO:0003824; F:GO:0016992; F:GO:0051536; F:GO:0051539	P:lipoate biosynthetic process; F:catalytic activity; F:lipoate synthase activity; F:iron-sulfur cluster binding; F:4 iron, 4 sulfur cluster binding
WP_023465115.1	inhibitor of vertebrate lysozyme [Pseudomonas aeruginosa]	37	5	10	5	17	339	5	0	5	Yes	-1.16401	0.0298949		1.55819	0.000550628	Up	2.89485	2.06208e-05	Up	-1.85411	8.4467e-05	Lower	PA3902		hypothetical protein	PA3902	1.37515	0.0176392	S	P:GO:0043086; C:GO:0042597	P:negative regulation of catalytic activity; C:periplasmic space			IPR014453 (PIRSF); IPR036501 (G3DSA:3.40.1420.GENE3D); PF08816 (PFAM); IPR036501 (SUPERFAMILY)	P:GO:0043086; C:GO:0042597	P:negative regulation of catalytic activity; C:periplasmic space
WP_003114413.1	MULTISPECIES: hypothetical protein [Pseudomonas]	26	4	7	4	18.7	173	4	0	4	Yes	-1.0165	0.746308		1.93251	1.35829e-05	Up	2.85305	1.65929e-06	Up	-1.26484	0.00701081		PA2750		hypothetical protein	PA2750	1.06522	0.350014	L					IPR016071 (PFAM); IPR035437 (G3DSA:2.40.50.GENE3D); mobidb-lite (MOBIDB_LITE); mobidb-lite (MOBIDB_LITE); IPR016071 (PROSITE_PROFILES); IPR035437 (SUPERFAMILY)	no GO terms	no GO terms
WP_003116471.1	MULTISPECIES: glutathione S-transferase [Pseudomonas]	12	2	3	2	22.4	81	2	0	2	Yes	-1.07593	0.14914		1.07926	0.117575		2.81538	2.73568e-06	Up				PA3035		probable glutathione S-transferase	PA3035	-1.04115	0.709784	O	P:GO:0006749; F:GO:0005515; F:GO:0016740	P:glutathione metabolic process; F:protein binding; F:transferase activity	EC:2	Transferases	PF13410 (PFAM); IPR004045 (PFAM); G3DSA:3.40.30.10 (GENE3D); G3DSA:1.20.1050.10 (GENE3D); SFLDG00358 (SFLD); IPR040079 (SFLD); PTHR44051:SF2 (PANTHER); PTHR44051 (PANTHER); IPR004045 (PROSITE_PROFILES); IPR010987 (PROSITE_PROFILES); cd03206 (CDD); cd03056 (CDD); IPR036282 (SUPERFAMILY); IPR036249 (SUPERFAMILY)	P:GO:0006749; F:GO:0005515	P:glutathione metabolic process; F:protein binding
WP_003114474.1	MULTISPECIES: DUF4124 domain-containing protein [Pseudomonas]	18	2	3	2	20.3	65	2	0	2	Yes	-1.14633	0.403794		1.99221	0.00328086	Up	2.80874	0.00163551	Up	-1.68888	0.0136619	Lower	PA5123		hypothetical protein	PA5123	-1.14992	0.119457	S					IPR025392 (PFAM)	no GO terms	no GO terms
WP_010791819.1	MULTISPECIES: hypothetical protein [Pseudomonas]	34	6	14	6	18.6	447	6	0	6	Yes	-1.0633	0.514361		2.02055	0.000365156	Up	2.79093	2.41115e-06	Up															mobidb-lite (MOBIDB_LITE); PS51257 (PROSITE_PROFILES)	no GO terms	no GO terms
WP_003107929.1	MULTISPECIES: precorrin-8X methylmutase [Pseudomonas]	23	5	8	5	21.6	210	5	0	5	Yes	1.02647	0.544724		1.38982	0.000188416		2.77931	4.84019e-06	Up	1.51906	0.000154948	Higher	PA2905	cobH	precorrin isomerase CobH	cobH	-1.01614	0.917871	H	P:GO:0009236; F:GO:0016993	P:cobalamin biosynthetic process; F:precorrin-8X methylmutase activity	EC:5.4.99.61; EC:5.4.1	Precorrin-8X methylmutase; Intramolecular transferases	IPR036588 (G3DSA:3.40.50.GENE3D); IPR003722 (PFAM); PTHR43588 (PANTHER); IPR036588 (SUPERFAMILY)	P:GO:0009236; F:GO:0016993	P:cobalamin biosynthetic process; F:precorrin-8X methylmutase activity
WP_003098450.1	MULTISPECIES: energy transducer TonB [Pseudomonas]	17	3	4	3	26.6	81	3	0	3	Yes	-1.03341	0.696817		2.34642	1.14565e-05	Up	2.74865	2.3604e-06	Up	1.70584	0.096161		PA0695		hypothetical protein	PA0695	1.20175	0.502475	M					IPR006260 (TIGRFAM); PF13103 (PFAM); G3DSA:3.30.1150.10 (GENE3D); mobidb-lite (MOBIDB_LITE); mobidb-lite (MOBIDB_LITE); mobidb-lite (MOBIDB_LITE); mobidb-lite (MOBIDB_LITE); SSF74653 (SUPERFAMILY)	no GO terms	no GO terms
WP_003098697.1	MULTISPECIES: phosphonate C-P lyase system protein PhnG [Pseudomonas]	74	10	21	10	16.6	688	10	0	10	Yes	-1.07895	0.385389		0.995565	0.977416		2.71555	0.000238333	Up	1.52365	0.01469	Higher	PA3380		conserved hypothetical protein	PA3380	-1.1669	0.642466	P	P:GO:0015716; P:GO:0019700; F:GO:0016829; F:GO:0061693; C:GO:0061694; C:GO:1904176	P:organic phosphonate transport; P:organic phosphonate catabolic process; F:lyase activity; F:alpha-D-ribose 1-methylphosphonate 5-triphosphate synthase activity; C:alpha-D-ribose 1-methylphosphonate 5-triphosphate synthase complex; C:carbon phosphorus lyase complex	EC:4; EC:2.7.8.37	Lyases; Alpha-D-ribose 1-methylphosphonate 5-triphosphate synthase	IPR009609 (PFAM); IPR009609 (TIGRFAM)	P:GO:0015716; P:GO:0019634	P:organic phosphonate transport; P:organic phosphonate metabolic process
WP_003093982.1	MULTISPECIES: hypothetical protein [Pseudomonas]	34	3	13	3	8.5	223	3	0	3	Yes	-1.00513	0.926684		2.17407	4.61075e-05	Up	2.70059	2.06265e-05	Up				PA4357		conserved hypothetical protein	PA4357	1.9948	0.015772	K					IPR036388 (G3DSA:1.10.10.GENE3D); IPR015102 (PFAM); IPR036390 (SUPERFAMILY)	no GO terms	no GO terms
WP_023465187.1	acetoin dehydrogenase dihydrolipoyllysine-residue acetyltransferase subunit [Pseudomonas aeruginosa]	21	6	11	6	40.3	379	6	0	6	Yes	-1.01833	0.67477		1.43821	0.000160556		2.68847	1.30773e-07	Up	1.44162	0.0211189		PA4152		probable hydrolase	PA4152	1.28213	0.344228	C	F:GO:0016740	F:transferase activity	EC:2	Transferases	IPR000073 (PRINTS); IPR000089 (PFAM); IPR029058 (G3DSA:3.40.50.GENE3D); G3DSA:2.40.50.100 (GENE3D); IPR000073 (PFAM); PTHR46438:SF2 (PANTHER); PTHR46438 (PANTHER); IPR003016 (PROSITE_PATTERNS); IPR000089 (PROSITE_PROFILES); cd06849 (CDD); IPR029058 (SUPERFAMILY); IPR011053 (SUPERFAMILY)	no GO terms	no GO terms
WP_003089693.1	MULTISPECIES: hypothetical protein [Pseudomonas]	13	2	3	2	15.6	94	2	0	2	Yes	1.07943	0.483667		2.32995	0.00185684	Up	2.67807	0.00213161	Up	1.12607	0.500022		PA2436		hypothetical protein	PA2436	1.05163	0.734048						no IPS match	no IPS match	no IPS match
WP_003111706.1	MULTISPECIES: hypothetical protein [Pseudomonas]	29	6	9	6	24.4	268	6	0	6	Yes	-1.26042	0.00517648		1.43044	0.000439792		2.67252	8.21137e-09	Up	-1.13809	0.0260555		PA0045		hypothetical protein	PA0045	1.75653	0.000438368	M	C:GO:0030288	C:outer membrane-bounded periplasmic space			G3DSA:3.40.50.10610 (GENE3D); IPR005534 (PFAM); PTHR41164 (PANTHER); PS51257 (PROSITE_PROFILES); SSF52964 (SUPERFAMILY)	C:GO:0030288	C:outer membrane-bounded periplasmic space
WP_003092495.1	MULTISPECIES: DUF4398 domain-containing protein [Pseudomonas]	15	2	12	2	14.4	518	2	0	2	Yes	1.16094	0.190029		2.59924	2.36394e-05	Up	2.66667	5.11709e-05	Up	-3.33588	9.82139e-06	Lower	PA3691		hypothetical protein	PA3691	-1.14036	0.643034	M					Coil (COILS); Coil (COILS); G3DSA:1.20.1270.390 (GENE3D); IPR025511 (PFAM); mobidb-lite (MOBIDB_LITE); mobidb-lite (MOBIDB_LITE); PS51257 (PROSITE_PROFILES)	no GO terms	no GO terms
WP_023084520.1	flagellar protein FliT [Pseudomonas aeruginosa]	57	4	17	4	10.9	643	4	0	4	Yes	-1.03107	0.435055		1.95638	1.16252e-05	Up	2.65781	8.67906e-06	Up										S					no IPS match	no IPS match	no IPS match
WP_003091480.1	MULTISPECIES: type I glyceraldehyde-3-phosphate dehydrogenase [Pseudomonas]	56	15	67	15	36.2	2046	15	0	15	Yes	1.02302	0.550788		1.3998	0.000120462		2.62051	3.92778e-06	Up	1.24222	0.00114784		PA3195	gapA	glyceraldehyde 3-phosphate dehydrogenase	gapA	1.18708	0.403714	G	P:GO:0006006; F:GO:0016620; F:GO:0050661; F:GO:0051287	P:glucose metabolic process; F:oxidoreductase activity, acting on the aldehyde or oxo group of donors, NAD or NADP as acceptor; F:NADP binding; F:NAD binding	EC:1.2.1	Acting on the aldehyde or oxo group of donors	IPR020831 (PRINTS); IPR020828 (PFAM); IPR020829 (PFAM); G3DSA:3.30.360.10 (GENE3D); IPR020831 (PIRSF); IPR006424 (TIGRFAM); G3DSA:3.40.50.720 (GENE3D); PTHR43148:SF3 (PANTHER); IPR020831 (PANTHER); IPR020830 (PROSITE_PATTERNS); SSF55347 (SUPERFAMILY); IPR036291 (SUPERFAMILY)	P:GO:0006006; F:GO:0016620; F:GO:0050661; F:GO:0051287	P:glucose metabolic process; F:oxidoreductase activity, acting on the aldehyde or oxo group of donors, NAD or NADP as acceptor; F:NADP binding; F:NAD binding
WP_003098699.1	MULTISPECIES: carbon-phosphorus lyase complex subunit PhnI [Pseudomonas]	37	11	26	11	40.6	780	11	0	11	Yes	-1.03546	0.174883		1.11593	0.0414349		2.61514	7.66946e-07	Up	1.73366	0.000514401	Higher	PA3378		conserved hypothetical protein	PA3378	-1.11306	0.612326	P	P:GO:0019700; F:GO:0016829; F:GO:0061693; C:GO:0061694; C:GO:1904176	P:organic phosphonate catabolic process; F:lyase activity; F:alpha-D-ribose 1-methylphosphonate 5-triphosphate synthase activity; C:alpha-D-ribose 1-methylphosphonate 5-triphosphate synthase complex; C:carbon phosphorus lyase complex	EC:4; EC:2.7.8.37	Lyases; Alpha-D-ribose 1-methylphosphonate 5-triphosphate synthase	IPR008773 (PFAM); IPR008773 (PIRSF)	P:GO:0019634	P:organic phosphonate metabolic process
WP_003099685.1	MULTISPECIES: hypothetical protein [Pseudomonas]	33	6	36	6	30.4	1576	6	0	6	Yes	-1.02088	0.825835		1.69957	0.000880099	Up	2.60598	3.32316e-05	Up	1.21095	0.0577635		PA5528		hypothetical protein	PA5528	1.13417	0.380577	S	C:GO:0016021	C:integral component of membrane			IPR007379 (PFAM); mobidb-lite (MOBIDB_LITE); mobidb-lite (MOBIDB_LITE); PTHR41542 (PANTHER); IPR032710 (SUPERFAMILY)	no GO terms	no GO terms
WP_003104786.1	MULTISPECIES: alpha-ketoacid dehydrogenase subunit beta [Pseudomonas]	27	8	14	8	36.4	477	8	0	8	Yes	-1.13767	0.114375		1.09132	0.264142		2.57728	0.000157238	Up	2.19787	2.30326e-05	Higher	PA4151	acoB	acetoin catabolism protein AcoB	acoB	1.10103	0.487724	C	F:GO:0016491	F:oxidoreductase activity	EC:1	Oxidoreductases	G3DSA:3.40.50.970 (GENE3D); IPR033248 (PFAM); IPR009014 (G3DSA:3.40.50.GENE3D); IPR005475 (PFAM); PTHR43257 (PANTHER); PTHR43257:SF3 (PANTHER); cd07036 (CDD); IPR009014 (SUPERFAMILY); IPR029061 (SUPERFAMILY)	F:GO:0003824	F:catalytic activity
WP_003134444.1	MULTISPECIES: MotA/TolQ/ExbB proton channel family protein [Pseudomonas]	13	7	10	7	65.2	369	7	0	7	Yes	-1.25078	0.000326274		1.24763	0.0133348		2.5725	1.64361e-06	Up	2.81476	0.000757964	Higher	PA0693	exbB2	transport protein ExbB2	exbB2	1.20216	0.372143	U	P:GO:0015031; C:GO:0016021	P:protein transport; C:integral component of membrane			G3DSA:2.60.120.200 (GENE3D); IPR002898 (PFAM); PF13385 (PFAM); IPR018765 (PFAM); PTHR30625 (PANTHER); PTHR30625:SF3 (PANTHER); IPR013320 (SUPERFAMILY)	no GO terms	no GO terms
WP_003120826.1	MULTISPECIES: polymer-forming cytoskeletal family protein [Pseudomonas]	29	3	6	3	14.8	238	3	0	3	Yes	-1.14465	0.0828109		-1.01042	0.895219		2.54872	1.71499e-05	Up	-1.34353	0.00819965		PA0664		hypothetical protein	PA0664	-1.31783	0.00197152	M					IPR007607 (PFAM); IPR007607 (PANTHER)	no GO terms	no GO terms
WP_003093158.1	MULTISPECIES: tRNA (N6-isopentenyl adenosine(37)-C2)-methylthiotransferase MiaB [Pseudomonas]	26	9	16	9	49.9	399	9	0	9	Yes	1.00685	0.917192		1.04667	0.436892		2.54863	3.07247e-07	Up	-1.1968	0.0195479		PA3980		conserved hypothetical protein	PA3980	-1.80369	2.73e-05	J	P:GO:0030488; P:GO:0035600; F:GO:0035597; F:GO:0046872; F:GO:0051539; C:GO:0005829	P:tRNA methylation; P:tRNA methylthiolation; F:N6-isopentenyladenosine methylthiotransferase activity; F:metal ion binding; F:4 iron, 4 sulfur cluster binding; C:cytosol	EC:2.8.4	Transferring sulfur-containing groups	IPR013848 (PFAM); IPR007197 (PFAM); IPR023404 (G3DSA:3.80.30.GENE3D); IPR005839 (TIGRFAM); IPR038135 (G3DSA:3.40.50.GENE3D); IPR002792 (PFAM); TIGR01574 (TIGRFAM); SFLDG01082 (SFLD); IPR006463 (SFLD); IPR007197 (SFLD); PTHR43020 (PANTHER); IPR020612 (PROSITE_PATTERNS); IPR002792 (PROSITE_PROFILES); IPR007197 (PROSITE_PROFILES); IPR006463 (HAMAP); IPR013848 (PROSITE_PROFILES); cd01335 (CDD); SSF10…	P:GO:0006400; F:GO:0003824; F:GO:0016740; F:GO:0035596; F:GO:0051536; F:GO:0051539	P:tRNA modification; F:catalytic activity; F:transferase activity; F:methylthiotransferase activity; F:iron-sulfur cluster binding; F:4 iron, 4 sulfur cluster binding
WP_110183949.1	S58 family peptidase [Pseudomonas aeruginosa]	10	3	5	3	38.5	186	3	0	3	Yes	1.23891	0.0134007		2.9614	7.04261e-06	Up	2.53886	1.9779e-05	Up	-3.19614	4.50175e-06	Lower	PA1486	bapF	beta-peptidyl aminopeptidase	PA1486	1.12655	0.502082	EQ	P:GO:0006508; F:GO:0004177	P:proteolysis; F:aminopeptidase activity	EC:3.4.11	Acting on peptide bonds (peptidases)	IPR005321 (PFAM); G3DSA:3.60.70.12 (GENE3D); IPR005321 (PANTHER); cd02253 (CDD); IPR016117 (SUPERFAMILY)	no GO terms	no GO terms
WP_023104541.1	MULTISPECIES: hypothetical protein [Pseudomonas]	27	6	9	6	35.4	250	6	0	6	Yes	-1.1696	0.0249624		1.44703	0.000806752		2.52442	3.97035e-07	Up	-2.06912	1.64283e-06	Lower	PA2913		hypothetical protein	PA2913	1.13289	0.386584	P					G3DSA:3.40.50.1980 (GENE3D); IPR002491 (PFAM); G3DSA:3.40.50.1980 (GENE3D); PTHR30535 (PANTHER); PTHR30535:SF7 (PANTHER); PS51257 (PROSITE_PROFILES); IPR002491 (PROSITE_PROFILES); cd01148 (CDD); SSF53807 (SUPERFAMILY)	no GO terms	no GO terms
WP_003091143.1	MULTISPECIES: 50S ribosomal protein L32 [Pseudomonas]	53	3	13	3	6.8	262	3	0	3	Yes	1.00318	0.783249		1.64442	0.0485795	Up	2.51689	0.00712059	Up	0.973318	0.749289		PA2970	rpmF	50S ribosomal protein L32	rpmF	1.57122	0.0534868	J	P:GO:0000027; P:GO:0000302; P:GO:0006412; P:GO:0009314; F:GO:0003735	P:ribosomal large subunit assembly; P:response to reactive oxygen species; P:translation; P:response to radiation; F:structural constituent of ribosome			IPR002677 (PFAM); IPR002677 (TIGRFAM); mobidb-lite (MOBIDB_LITE); mobidb-lite (MOBIDB_LITE); mobidb-lite (MOBIDB_LITE); IPR044957 (PANTHER); IPR002677 (HAMAP); IPR011332 (SUPERFAMILY)	P:GO:0006412; F:GO:0003735; C:GO:0015934	P:translation; F:structural constituent of ribosome; C:large ribosomal subunit
WP_003083059.1	MULTISPECIES: flagellar biosynthesis protein FlhA [Pseudomonas]	2	2	3	2	75.8	65	2	0	2	Yes	-1.01924	0.772081		1.00977	0.967211		2.50859	0.000129427	Up	-1.13178	0.0179229		PA1452	flhA	flagellar biosynthesis protein FlhA	flhA	-1.17854	0.0694322	N	P:GO:0009306; P:GO:0044780; C:GO:0005886; C:GO:0016021	P:protein secretion; P:bacterial-type flagellum assembly; C:plasma membrane; C:integral component of membrane			IPR001712 (PRINTS); IPR001712 (PIRSF); IPR042193 (G3DSA:1.10.8.GENE3D); IPR006301 (TIGRFAM); IPR001712 (PFAM); IPR042196 (G3DSA:3.40.50.GENE3D); IPR042194 (G3DSA:3.40.30.GENE3D); PTHR30161:SF1 (PANTHER); IPR001712 (PANTHER); IPR025505 (PROSITE_PATTERNS)	P:GO:0009306; P:GO:0044780; C:GO:0016020; C:GO:0016021	P:protein secretion; P:bacterial-type flagellum assembly; C:membrane; C:integral component of membrane
WP_003109112.1	MULTISPECIES: hypothetical protein [Pseudomonas]	35	2	3	2	6.6	56	2	0	2	Yes	1.12273	0.0891862		-1.46301	0.00558659		2.47983	3.77092e-05	Up	-1.80937	8.66876e-07	Lower	PA1112b		hypothetical protein									no IPS match	no IPS match	no IPS match
WP_003092499.1	MULTISPECIES: DUF4398 domain-containing protein [Pseudomonas]	52	11	40	11	28.5	1269	11	0	11	Yes	1.27589	0.000144363		2.59858	1.04934e-06	Up	2.4773	7.10486e-08	Up	-6.29929	1.21618e-06	Lower	PA3692	lptF	Lipotoxon F, LptF	lptF	-1.07845	0.779447	M	C:GO:0009279; C:GO:0016021	C:cell outer membrane; C:integral component of membrane			Coil (COILS); IPR006664 (PRINTS); IPR006665 (PFAM); IPR036737 (G3DSA:3.30.1330.GENE3D); IPR025511 (PFAM); PTHR30128 (PANTHER); PTHR30128:SF54 (PANTHER); IPR006690 (PROSITE_PATTERNS); IPR006665 (PROSITE_PROFILES); PS51257 (PROSITE_PROFILES); IPR006665 (CDD); IPR036737 (SUPERFAMILY)	C:GO:0009279; C:GO:0016021	C:cell outer membrane; C:integral component of membrane
WP_003119751.1	MULTISPECIES: type II secretion system protein GspG [Pseudomonas]	44	5	16	5	16.1	381	5	0	5	Yes	1.0284	0.507442		1.97816	6.49829e-05	Up	2.46833	5.09833e-07	Up	-1.61031	0.000208974	Lower	PA3101	xcpT	general secretion pathway protein G	xcpT	1.20827	0.148645	U	C:GO:0015627; C:GO:0016021	C:type II protein secretion system complex; C:integral component of membrane			IPR000983 (PRINTS); IPR010054 (TIGRFAM); IPR012902 (TIGRFAM); IPR012902 (PFAM); G3DSA:3.30.700.10 (GENE3D); IPR013545 (PFAM); mobidb-lite (MOBIDB_LITE); PTHR30093:SF33 (PANTHER); PTHR30093 (PANTHER); IPR012902 (PROSITE_PATTERNS); IPR045584 (SUPERFAMILY)	P:GO:0015628; C:GO:0015627	P:protein secretion by the type II secretion system; C:type II protein secretion system complex
WP_003095696.1	MULTISPECIES: phosphomethylpyrimidine synthase [Pseudomonas]	42	21	64	21	69.7	1799	21	0	21	Yes	-1.01298	0.665813		1.46595	2.12669e-05		2.46494	1.24693e-06	Up	1.94747	0.00286827	Higher	PA4973	thiC	thiamin biosynthesis protein ThiC	thiC	-1.08865	0.220023	H	P:GO:0006805; P:GO:0009228; P:GO:0009229; F:GO:0008270; F:GO:0016830; F:GO:0051539; C:GO:0005829	P:xenobiotic metabolic process; P:thiamine biosynthetic process; P:thiamine diphosphate biosynthetic process; F:zinc ion binding; F:carbon-carbon lyase activity; F:4 iron, 4 sulfur cluster binding; C:cytosol	EC:4.1	Carbon-carbon lyases	Coil (COILS); IPR002817 (PFAM); IPR002817 (TIGRFAM); IPR025747 (PFAM); IPR038521 (G3DSA:3.20.20.GENE3D); G3DSA:6.10.250.620 (GENE3D); SFLDG01114 (SFLD); IPR002817 (SFLD); SFLDS00113 (SFLD); mobidb-lite (MOBIDB_LITE); mobidb-lite (MOBIDB_LITE); PTHR30557:SF1 (PANTHER); IPR002817 (PANTHER); IPR037509 (HAMAP)	P:GO:0009228; F:GO:0016830; F:GO:0051536	P:thiamine biosynthetic process; F:carbon-carbon lyase activity; F:iron-sulfur cluster binding
WP_003098644.1	MULTISPECIES: DUF4197 domain-containing protein [Pseudomonas]	50	8	21	8	23.6	998	8	0	8	Yes	-1.04025	0.198988		1.63419	1.70483e-05	Up	2.46254	6.92333e-08	Up	-1.14386	0.0104934		PA3675		hypothetical protein	PA3675	-1.32577	0.000227763	S					IPR025245 (PFAM)	no GO terms	no GO terms
WP_003455475.1	DUF1513 domain-containing protein [Pseudomonas aeruginosa]	19	5	14	5	39.9	329	5	0	5	Yes	-1.05479	0.370761		1.27522	0.00474119		2.45284	2.59683e-05	Up	1.42918	0.000690114		PA4373		hypothetical protein	PA4373	1.46844	0.0282016	S	F:GO:0005515	F:protein binding			IPR015943 (G3DSA:2.130.10.GENE3D); IPR008311 (PIRSF); IPR008311 (PFAM); IPR011044 (SUPERFAMILY)	F:GO:0005515	F:protein binding
WP_003088566.1	MULTISPECIES: CoA transferase subunit A [Pseudomonas]	28	4	28	4	25.2	960	4	0	4	Yes	1.01707	0.471951		1.69042	3.00031e-05	Up	2.4265	2.88973e-08	Up	1.03179	0.464563		PA1999	dhcA	dehydrocarnitine CoA transferase, subunit A	dhcA	1.62296	0.0535264	I	P:GO:0042413; F:GO:0008260	P:carnitine catabolic process; F:3-oxoacid CoA-transferase activity	EC:2.8.3.5	3-oxoacid CoA-transferase	G3DSA:3.40.1080.10 (GENE3D); IPR012792 (TIGRFAM); IPR004165 (PFAM); IPR004165 (PANTHER); IPR004163 (PROSITE_PATTERNS); IPR037171 (SUPERFAMILY)	F:GO:0008410	F:CoA-transferase activity
WP_003118432.1	MULTISPECIES: phosphonate ABC transporter ATP-binding protein [Pseudomonas]	36	7	19	6	29.6	605	7	0	6	Yes	-1.05939	0.549524		1.37185	0.0263262		2.4114	0.000420739	Up										P	P:GO:0015716; F:GO:0005524; F:GO:0015416; F:GO:0016887; C:GO:0005886	P:organic phosphonate transport; F:ATP binding; F:ABC-type phosphonate transporter activity; F:ATP hydrolysis activity; C:plasma membrane	EC:3.6.1; EC:7.3.2.2	Acting on acid anhydrides; ABC-type phosphonate transporter	IPR012693 (TIGRFAM); IPR027417 (G3DSA:3.40.50.GENE3D); IPR003439 (PFAM); mobidb-lite (MOBIDB_LITE); PTHR43166:SF6 (PANTHER); PTHR43166 (PANTHER); IPR017871 (PROSITE_PATTERNS); IPR003439 (PROSITE_PROFILES); IPR012693 (CDD); IPR027417 (SUPERFAMILY)	P:GO:0015716; F:GO:0005524; F:GO:0015416; C:GO:0016020	P:organic phosphonate transport; F:ATP binding; F:ABC-type phosphonate transporter activity; C:membrane
WP_003097515.1	MULTISPECIES: copper resistance system multicopper oxidase [Proteobacteria]	4	2	3	2	69.1	174	2	0	2	Yes	-1.06607	0.611347		1.63002	0.00389414	Up	2.40922	0.000533213	Up										Q	F:GO:0005507; F:GO:0052716; C:GO:0042597	F:copper ion binding; F:hydroquinone:oxygen oxidoreductase activity; C:periplasmic space	EC:1.10.3.2	Laccase	IPR006376 (TIGRFAM); IPR008972 (G3DSA:2.60.40.GENE3D); IPR011706 (PFAM); IPR008972 (G3DSA:2.60.40.GENE3D); IPR019546 (TIGRFAM); IPR001117 (PFAM); IPR008972 (G3DSA:2.60.40.GENE3D); IPR011707 (PFAM); mobidb-lite (MOBIDB_LITE); mobidb-lite (MOBIDB_LITE); IPR045087 (PANTHER); PTHR11709:SF416 (PANTHER); IPR033138 (PROSITE_PATTERNS); IPR033138 (PROSITE_PATTERNS); IPR002355 (PROSITE_PATTERNS); IPR006311…	F:GO:0005507; F:GO:0016491; C:GO:0042597	F:copper ion binding; F:oxidoreductase activity; C:periplasmic space
WP_023465009.1	bifunctional polymyxin resistance protein ArnA [Pseudomonas aeruginosa]	45	23	70	23	74.3	2162	23	0	23	Yes	1.00619	0.876086		1.36991	0.00310862		2.39922	4.75812e-05	Up	0.867759	0.0585091		PA3554	arnA	ArnA	arnA	1.47834	0.0201978	I	P:GO:0009103; P:GO:0009245; P:GO:0033320; P:GO:0034214; P:GO:0046677; P:GO:2001315; F:GO:0042802; F:GO:0048040; F:GO:0070403; F:GO:0099618; F:GO:0099619	P:lipopolysaccharide biosynthetic process; P:lipid A biosynthetic process; P:UDP-D-xylose biosynthetic process; P:protein hexamerization; P:response to antibiotic; P:UDP-4-deoxy-4-formamido-beta-L-arabinopyranose biosynthetic process; F:identical protein binding; F:UDP-glucuronate decarboxylase activity; F:NAD+ binding; F:UDP-glucuronic acid dehydrogenase activity; F:UDP-4-amino-4-deoxy-L-arabino…	EC:1.1.1.305; EC:4.1.1.35; EC:2.1.2.13	UDP-glucuronic acid oxidase (UDP-4-keto-hexauronic acid decarboxylating); UDP-glucuronate decarboxylase; UDP-4-amino-4-deoxy-L-arabinose formyltransferase	IPR002376 (PFAM); IPR005793 (PFAM); IPR021168 (PIRSF); G3DSA:3.40.50.720 (GENE3D); G3DSA:3.40.50.12230 (GENE3D); IPR001509 (PFAM); PTHR43245 (PANTHER); PTHR43245:SF13 (PANTHER); IPR021168 (HAMAP); IPR045869 (CDD); cd08702 (CDD); IPR011034 (SUPERFAMILY); IPR036291 (SUPERFAMILY); IPR036477 (SUPERFAMILY)	P:GO:0009058; F:GO:0003824; F:GO:0016742; F:GO:0016831	P:biosynthetic process; F:catalytic activity; F:hydroxymethyl-, formyl- and related transferase activity; F:carboxy-lyase activity
WP_003112547.1	MULTISPECIES: quinolinate synthase [Pseudomonas]	25	8	17	8	38.4	515	8	0	8	Yes	-1.00719	0.806394		1.6063	7.86448e-06	Up	2.39565	8.50477e-07	Up	1.20871	0.00321098		PA1004	nadA	quinolinate synthetase A	nadA	-1.27629	0.00464901	H	P:GO:0006805; P:GO:0019674; P:GO:0019805; P:GO:0034628; F:GO:0008987; F:GO:0046872; F:GO:0051539; C:GO:0005829	P:xenobiotic metabolic process; P:NAD metabolic process; P:quinolinate biosynthetic process; P:'de novo' NAD biosynthetic process from aspartate; F:quinolinate synthetase A activity; F:metal ion binding; F:4 iron, 4 sulfur cluster binding; C:cytosol	EC:2.5.1	Transferring alkyl or aryl groups, other than methyl groups	IPR003473 (PFAM); IPR003473 (TIGRFAM); IPR036094 (G3DSA:3.40.50.GENE3D); IPR036094 (G3DSA:3.40.50.GENE3D); IPR036094 (G3DSA:3.40.50.GENE3D); IPR003473 (PANTHER); IPR023513 (HAMAP); IPR036094 (SUPERFAMILY)	P:GO:0009435; F:GO:0008987; F:GO:0016765; F:GO:0051539	P:NAD biosynthetic process; F:quinolinate synthetase A activity; F:transferase activity, transferring alkyl or aryl (other than methyl) groups; F:4 iron, 4 sulfur cluster binding
WP_003093711.1	MULTISPECIES: 50S ribosomal protein L24 [Pseudomonas]	61	5	37	5	11.5	959	5	0	5	Yes	-1.05419	0.172658		1.45651	2.51556e-05		2.38959	1.69334e-07	Up	1.31004	0.00877548		PA4252	rplX	50S ribosomal protein L24	rplX	2.98512	0.00395566	J	P:GO:0000027; P:GO:0006412; F:GO:0003735; F:GO:0019843; C:GO:0005618	P:ribosomal large subunit assembly; P:translation; F:structural constituent of ribosome; F:rRNA binding; C:cell wall			IPR003256 (PFAM); IPR003256 (TIGRFAM); IPR005824 (PFAM); IPR014722 (G3DSA:2.30.30.GENE3D); IPR003256 (PANTHER); IPR005825 (PROSITE_PATTERNS); IPR003256 (HAMAP); IPR041988 (CDD); IPR008991 (SUPERFAMILY)	P:GO:0006412; F:GO:0003723; F:GO:0003735; C:GO:0005840	P:translation; F:RNA binding; F:structural constituent of ribosome; C:ribosome
WP_023835595.1	alkyl hydroperoxide reductase subunit F [Pseudomonas aeruginosa]	33	16	31	16	55.8	911	16	0	16	Yes	1.02755	0.45614		1.52718	0.000104945	Up	2.38757	1.59134e-06	Up	-1.58898	0.000804574	Lower	PA0140	ahpF	alkyl hydroperoxide reductase subunit F	ahpF	1.15627	0.26569	O	P:GO:0000302; P:GO:0022900; P:GO:0045454; F:GO:0008785; F:GO:0009055; F:GO:0015035; F:GO:0016651; F:GO:0051287; F:GO:0071949; C:GO:0005829; C:GO:0009321	P:response to reactive oxygen species; P:electron transport chain; P:cell redox homeostasis; F:alkyl hydroperoxide reductase activity; F:electron transfer activity; F:protein-disulfide reductase activity; F:oxidoreductase activity, acting on NAD(P)H; F:NAD binding; F:FAD binding; C:cytosol; C:alkyl hydroperoxide reductase complex	EC:1.8.1; EC:1.6	Acting on a sulfur group of donors; Acting on NADH or NADPH	Coil (COILS); PR00469 (PRINTS); PR00368 (PRINTS); IPR012081 (TIGRFAM); IPR036188 (G3DSA:3.50.50.GENE3D); G3DSA:3.40.30.80 (GENE3D); IPR023753 (PFAM); IPR012081 (PIRSF); IPR012336 (PFAM); IPR036188 (G3DSA:3.50.50.GENE3D); PTHR48105 (PANTHER); PTHR48105:SF6 (PANTHER); IPR008255 (PROSITE_PATTERNS); PS51354 (PROSITE_PROFILES); IPR044141 (CDD); IPR044142 (CDD); IPR036249 (SUPERFAMILY); IPR036249 (SUPE…	P:GO:0000302; F:GO:0008785; F:GO:0016491; F:GO:0050660; F:GO:0051287	P:response to reactive oxygen species; F:alkyl hydroperoxide reductase activity; F:oxidoreductase activity; F:flavin adenine dinucleotide binding; F:NAD binding
WP_004348283.1	MULTISPECIES: CoA transferase [Pseudomonas]	18	7	10	7	43.1	127	7	0	7	Yes	1.03336	0.680358		1.74861	0.000647046	Up	2.37728	0.000487284	Up	-1.84234	0.000627777	Lower	PA0882		hypothetical protein	PA0882	1.42702	0.0719389	C	F:GO:0008410	F:CoA-transferase activity	EC:2.8.3	Transferring sulfur-containing groups	IPR023606 (G3DSA:3.40.50.GENE3D); IPR044855 (G3DSA:3.30.1540.GENE3D); IPR003673 (PFAM); PTHR48207 (PANTHER); IPR023606 (SUPERFAMILY)	F:GO:0003824	F:catalytic activity
WP_003160368.1	MULTISPECIES: glycine dehydrogenase (decarboxylating) [Pseudomonas]	34	27	72	26	103.8	2347	27	1	27	Yes	-1.07426	0.0452778		-1.26308	0.000533376		2.368	9.70284e-06	Up	1.07771	0.0695757		PA2445	gcvP2	glycine cleavage system protein P2	gcvP2	1.25251	0.108957	E	P:GO:0019464; F:GO:0004375	P:glycine decarboxylation via glycine cleavage system; F:glycine dehydrogenase (decarboxylating) activity	EC:1.4.4.2	Glycine dehydrogenase (aminomethyl-transferring)	Coil (COILS); Coil (COILS); IPR015422 (G3DSA:3.90.1150.GENE3D); IPR003437 (TIGRFAM); IPR015421 (G3DSA:3.40.640.GENE3D); IPR020581 (PFAM); PTHR11773:SF7 (PANTHER); IPR020581 (PANTHER); IPR003437 (HAMAP); IPR020581 (CDD); IPR015424 (SUPERFAMILY); IPR015424 (SUPERFAMILY)	P:GO:0006544; P:GO:0006546; F:GO:0003824; F:GO:0004375	P:glycine metabolic process; P:glycine catabolic process; F:catalytic activity; F:glycine dehydrogenase (decarboxylating) activity
WP_003104406.1	MULTISPECIES: hypothetical protein [Pseudomonas]	64	3	6	3	6.7	241	3	0	3	Yes	1.05702	0.850096		2.53221	0.0237827	Up	2.34319	0.130896		1.19571	0.665607		PA1571		hypothetical protein	PA1571	1.01241	0.933477						no IPS match	no IPS match	no IPS match
WP_003097818.1	MULTISPECIES: PLP-dependent aminotransferase family protein [Pseudomonas]	8	4	6	4	43.3	73	4	0	4	Yes	-1.02844	0.758451		1.09549	0.384817		2.34032	0.00220385	Up	1.02354	0.786927		PA1654		probable aminotransferase	PA1654	-1.26656	0.0601443	EK	P:GO:0009058; F:GO:0030170; F:GO:0047536	P:biosynthetic process; F:pyridoxal phosphate binding; F:2-aminoadipate transaminase activity	EC:2.6.1.39	2-aminoadipate transaminase	IPR015422 (G3DSA:3.90.1150.GENE3D); IPR015421 (G3DSA:3.40.640.GENE3D); IPR004839 (PFAM); PTHR42790 (PANTHER); PTHR42790:SF3 (PANTHER); cd00609 (CDD); IPR015424 (SUPERFAMILY)	P:GO:0009058; F:GO:0003824; F:GO:0030170	P:biosynthetic process; F:catalytic activity; F:pyridoxal phosphate binding
WP_003129236.1	hypothetical protein [Pseudomonas aeruginosa]	40	6	11	6	26.8	275	6	0	6	Yes	-1.00588	0.788366		1.0807	0.0212476		2.33596	3.42175e-07	Up											C:GO:0016020; C:GO:0016021	C:membrane; C:integral component of membrane			Coil (COILS)	no GO terms	no GO terms
WP_003103810.1	MULTISPECIES: alkene reductase [Pseudomonas]	28	8	17	8	37.8	381	8	0	8	Yes	1.08134	0.133185		1.55305	0.000635687	Up	2.31742	5.89813e-05	Up	-2.33466	3.74631e-05	Lower	PA4356	xenB	xenobiotic reductase	xenB	1.38553	0.0397902	C	F:GO:0010181; F:GO:0016491; C:GO:0005829	F:FMN binding; F:oxidoreductase activity; C:cytosol	EC:1	Oxidoreductases	IPR013785 (G3DSA:3.20.20.GENE3D); IPR001155 (PFAM); PTHR22893:SF98 (PANTHER); IPR045247 (PANTHER); cd02933 (CDD); SSF51395 (SUPERFAMILY)	F:GO:0003824; F:GO:0010181; F:GO:0016491	F:catalytic activity; F:FMN binding; F:oxidoreductase activity
WP_003109544.1	MULTISPECIES: porin [Pseudomonas]	8	2	3	2	49.8	43	2	0	2	Yes	-1.09145	0.544523		3.35233	0.000146089	Up	2.30373	0.000698098	Up	1.55606	0.119248		PA2505	opdT	tyrosine porin OpdT	opdT	-1.30476	0.0480381	S	P:GO:0055085; F:GO:0015288; F:GO:0016787; C:GO:0016021	P:transmembrane transport; F:porin activity; F:hydrolase activity; C:integral component of membrane	EC:3; EC:7	Hydrolases; Translocases	IPR023614 (G3DSA:2.40.160.GENE3D); IPR005318 (PFAM); IPR005318 (PANTHER)	C:GO:0016021	C:integral component of membrane
WP_003116863.1	MULTISPECIES: anthranilate 1,2-dioxygenase electron transfer component AntC [Pseudomonas]	6	2	3	2	37.9	84	2	0	2	Yes	-1.17817	0.180907		1.0527	0.482213		2.29728	2.37214e-05	Up	0.622294	0.108151		PA2514	antC	anthranilate dioxygenase reductase	antC	-1.208	0.428951	C	P:GO:0022900; F:GO:0009055; F:GO:0046872; F:GO:0051213; F:GO:0051537	P:electron transport chain; F:electron transfer activity; F:metal ion binding; F:dioxygenase activity; F:2 iron, 2 sulfur cluster binding	EC:1	Oxidoreductases	PR00410 (PRINTS); IPR001709 (PRINTS); IPR039261 (G3DSA:3.40.50.GENE3D); IPR012675 (G3DSA:3.10.20.GENE3D); IPR001041 (PFAM); G3DSA:2.40.30.10 (GENE3D); IPR008333 (PFAM); IPR001433 (PFAM); PTHR47354 (PANTHER); PTHR47354:SF5 (PANTHER); IPR006058 (PROSITE_PATTERNS); IPR001041 (PROSITE_PROFILES); IPR017927 (PROSITE_PROFILES); IPR001041 (CDD); cd06209 (CDD); IPR036010 (SUPERFAMILY); IPR039261 (SUPERFAM…	F:GO:0016491; F:GO:0051536; F:GO:0051537	F:oxidoreductase activity; F:iron-sulfur cluster binding; F:2 iron, 2 sulfur cluster binding
WP_003127732.1	MULTISPECIES: 2-hydroxyacid dehydrogenase [Pseudomonas]	15	5	17	5	36.4	666	5	0	5	Yes	-1.1265	0.0184325		-1.29415	0.00225868		2.29598	7.31857e-07	Up										CH	F:GO:0008114; F:GO:0030267; F:GO:0050609; F:GO:0051287	F:phosphogluconate 2-dehydrogenase activity; F:glyoxylate reductase (NADP+) activity; F:phosphonate dehydrogenase activity; F:NAD binding	EC:1.1.1.43; EC:1.1.1.79; EC:1.20.1.1	Phosphogluconate 2-dehydrogenase; Glyoxylate reductase (NADP(+)); Phosphonate dehydrogenase	G3DSA:3.40.50.720 (GENE3D); IPR006140 (PFAM); G3DSA:3.40.50.720 (GENE3D); IPR006139 (PFAM); PTHR10996 (PANTHER); PTHR10996:SF247 (PANTHER); IPR029753 (PROSITE_PATTERNS); cd12157 (CDD); IPR036291 (SUPERFAMILY); SSF52283 (SUPERFAMILY)	F:GO:0016616; F:GO:0051287	F:oxidoreductase activity, acting on the CH-OH group of donors, NAD or NADP as acceptor; F:NAD binding
WP_003093507.1	MULTISPECIES: thiamine pyrophosphate-dependent dehydrogenase E1 component subunit alpha [Pseudomonas]	21	5	8	5	34.6	235	5	0	5	Yes	-1.09985	0.102777		1.0103	0.847692		2.29593	1.21909e-07	Up	4.97305	0.000228122	Higher	PA4150		probable dehydrogenase E1 component	PA4150	1.13934	0.625179	C	P:GO:0006086; F:GO:0004739; C:GO:0005967	P:acetyl-CoA biosynthetic process from pyruvate; F:pyruvate dehydrogenase (acetyl-transferring) activity; C:mitochondrial pyruvate dehydrogenase complex	EC:1.2.4.1	Pyruvate dehydrogenase (acetyl-transferring)	IPR001017 (PFAM); G3DSA:3.40.50.970 (GENE3D); PTHR11516 (PANTHER); cd02000 (CDD); IPR029061 (SUPERFAMILY)	F:GO:0016624	F:oxidoreductase activity, acting on the aldehyde or oxo group of donors, disulfide as acceptor
WP_003094760.1	MULTISPECIES: 50S ribosomal protein L27 [Pseudomonas]	47	5	22	5	9	365	5	0	5	Yes	-1.04821	0.140795		1.2556	0.0117739		2.28705	9.56022e-08	Up	-1.14527	0.00392506		PA4567	rpmA	50S ribosomal protein L27	rpmA	1.43824	0.164767	J	P:GO:0000027; P:GO:0001558; P:GO:0006412; P:GO:0042256; P:GO:0090070; P:GO:1902626; F:GO:0003735; F:GO:0043022; C:GO:0005618; C:GO:0005886	P:ribosomal large subunit assembly; P:regulation of cell growth; P:translation; P:mature ribosome assembly; P:positive regulation of ribosome biogenesis; P:assembly of large subunit precursor of preribosome; F:structural constituent of ribosome; F:ribosome binding; C:cell wall; C:plasma membrane			IPR001684 (PRINTS); IPR001684 (PFAM); G3DSA:2.40.50.100 (GENE3D); IPR001684 (TIGRFAM); mobidb-lite (MOBIDB_LITE); IPR001684 (PANTHER); IPR018261 (PROSITE_PATTERNS); IPR001684 (HAMAP); SSF110324 (SUPERFAMILY)	P:GO:0006412; F:GO:0003735; C:GO:0005840	P:translation; F:structural constituent of ribosome; C:ribosome
WP_003105560.1	MULTISPECIES: U32 family peptidase [Pseudomonas]	15	6	10	6	51.7	313	6	0	6	Yes	-1.00652	0.884432		1.12651	0.234614		2.27613	1.01103e-05	Up	1.5	0.0406699	Higher	PA5440		probable peptidase	PA5440	-1.30713	0.122615	O	P:GO:0006508; F:GO:0008233; C:GO:0005829	P:proteolysis; F:peptidase activity; C:cytosol	EC:3.4	Acting on peptide bonds (peptidases)	G3DSA:2.40.30.10 (GENE3D); IPR032525 (PFAM); IPR001539 (PFAM); PTHR30217 (PANTHER); PTHR30217:SF6 (PANTHER); IPR001539 (PROSITE_PATTERNS)	no GO terms	no GO terms
WP_003100972.1	MULTISPECIES: monofunctional biosynthetic peptidoglycan transglycosylase [Pseudomonas]	20	4	10	4	27.8	140	4	0	4	Yes	1.06312	0.109918		2.08555	1.28929e-05	Up	2.27414	7.74565e-07	Up	1.05878	0.253137		PA0378		probable transglycosylase	PA0378	-1.11448	0.272214	M	P:GO:0008360; P:GO:0043164; P:GO:0071555; F:GO:0008955; F:GO:0016763; C:GO:0005886; C:GO:0016021	P:regulation of cell shape; P:Gram-negative-bacterium-type cell wall biogenesis; P:cell wall organization; F:peptidoglycan glycosyltransferase activity; F:pentosyltransferase activity; C:plasma membrane; C:integral component of membrane	EC:2.4.2; EC:2.4.1.129	Glycosyltransferases; Peptidoglycan glycosyltransferase	IPR001264 (PFAM); IPR036950 (G3DSA:1.10.3810.GENE3D); IPR011812 (TIGRFAM); IPR011812 (PANTHER); IPR011812 (HAMAP); IPR023346 (SUPERFAMILY)	P:GO:0009252; F:GO:0016763; C:GO:0009274; C:GO:0016021	P:peptidoglycan biosynthetic process; F:pentosyltransferase activity; C:peptidoglycan-based cell wall; C:integral component of membrane
WP_003096653.1	MULTISPECIES: DNA-binding response regulator [Pseudomonas]	52	8	37	8	25.7	1421	8	0	8	Yes	-1.06508	0.0837973		1.2548	0.00188249		2.27055	9.88719e-06	Up	1.67812	9.61708e-06	Higher	PA5360	phoB	two-component response regulator PhoB	phoB	-1.08281	0.66538	K	P:GO:0000160; P:GO:0006817; P:GO:0045893; P:GO:0071978; P:GO:0080040; F:GO:0000156; F:GO:0000976; F:GO:0001216; C:GO:0005829; C:GO:0032993	P:phosphorelay signal transduction system; P:phosphate ion transport; P:positive regulation of transcription, DNA-templated; P:bacterial-type flagellum-dependent swarming motility; P:positive regulation of cellular response to phosphate starvation; F:phosphorelay response regulator activity; F:transcription cis-regulatory region binding; F:DNA-binding transcription activator activity; C:cytosol; …			G3DSA:6.10.250.690 (GENE3D); IPR001867 (PFAM); IPR036388 (G3DSA:1.10.10.GENE3D); IPR011879 (TIGRFAM); G3DSA:3.40.50.2300 (GENE3D); IPR001789 (PFAM); PTHR48111:SF40 (PANTHER); IPR039420 (PANTHER); IPR001867 (PROSITE_PROFILES); IPR001789 (PROSITE_PROFILES); cd17618 (CDD); IPR001867 (CDD); IPR011006 (SUPERFAMILY); IPR016032 (SUPERFAMILY)	P:GO:0000160; P:GO:0006355; P:GO:0006817; F:GO:0000156; F:GO:0003677	P:phosphorelay signal transduction system; P:regulation of transcription, DNA-templated; P:phosphate ion transport; F:phosphorelay response regulator activity; F:DNA binding
WP_110183979.1	catalase [Pseudomonas aeruginosa]	12	7	14	7	57.1	276	7	0	7	Yes	1.14184	0.00291242		1.60662	2.25646e-05	Up	2.2435	3.86739e-07	Up	-3.17305	1.03995e-06	Lower	PA4613	katB	catalase	katB	1.07989	0.297188	C	P:GO:0017001; P:GO:0042178; P:GO:0042542; P:GO:0042744; P:GO:0098869; F:GO:0004096; F:GO:0020037; F:GO:0046872; C:GO:0005737; C:GO:0042597	P:antibiotic catabolic process; P:xenobiotic catabolic process; P:response to hydrogen peroxide; P:hydrogen peroxide catabolic process; P:cellular oxidant detoxification; F:catalase activity; F:heme binding; F:metal ion binding; C:cytoplasm; C:periplasmic space	EC:1.11.1.6	Catalase	IPR018028 (PRINTS); IPR024711 (PIRSF); IPR010582 (PFAM); IPR011614 (PFAM); G3DSA:2.40.180.10 (GENE3D); mobidb-lite (MOBIDB_LITE); mobidb-lite (MOBIDB_LITE); mobidb-lite (MOBIDB_LITE); IPR018028 (PANTHER); PTHR11465:SF23 (PANTHER); IPR002226 (PROSITE_PATTERNS); IPR024708 (PROSITE_PATTERNS); IPR018028 (PROSITE_PROFILES); cd08154 (CDD); IPR020835 (SUPERFAMILY)	P:GO:0006979; F:GO:0004096; F:GO:0020037	P:response to oxidative stress; F:catalase activity; F:heme binding
WP_023464258.1	biotin synthase [Pseudomonas aeruginosa]	15	5	9	5	39.1	237	5	0	5	Yes	-1.0213	0.641148		-1.52554	4.66177e-05	Down	2.23994	3.63401e-06	Up	-1.21703	0.00660171		PA0500	bioB	biotin synthase	bioB	1.00937	0.948146	H	P:GO:0006805; P:GO:0009102; F:GO:0004076; F:GO:0005506; F:GO:0051537; F:GO:0051539; F:GO:1904047; C:GO:0005618; C:GO:0005886	P:xenobiotic metabolic process; P:biotin biosynthetic process; F:biotin synthase activity; F:iron ion binding; F:2 iron, 2 sulfur cluster binding; F:4 iron, 4 sulfur cluster binding; F:S-adenosyl-L-methionine binding; C:cell wall; C:plasma membrane	EC:2.8.1.6	Biotin synthase	IPR007197 (PFAM); IPR013785 (G3DSA:3.20.20.GENE3D); IPR002684 (TIGRFAM); IPR024177 (PIRSF); IPR010722 (PFAM); IPR007197 (SFLD); IPR024177 (SFLD); IPR002684 (PANTHER); IPR007197 (PROSITE_PROFILES); IPR002684 (HAMAP); cd01335 (CDD); SSF102114 (SUPERFAMILY)	P:GO:0009102; F:GO:0003824; F:GO:0004076; F:GO:0051536	P:biotin biosynthetic process; F:catalytic activity; F:biotin synthase activity; F:iron-sulfur cluster binding
WP_003117128.1	MULTISPECIES: 4-hydroxyphenylpyruvate dioxygenase [Pseudomonas]	60	16	146	16	39.9	5420	16	0	16	Yes	1.10673	0.00825459		2.29491	1.26411e-05	Up	2.2235	1.0966e-07	Up	1.37827	1.9812e-05		PA0865	hpd	4-hydroxyphenylpyruvate dioxygenase	hpd	1.52903	0.0825243	E	P:GO:0009072; P:GO:0019836; P:GO:0044003; P:GO:0044179; P:GO:0044364; P:GO:0044764; F:GO:0003868; F:GO:0046872	P:aromatic amino acid family metabolic process; P:hemolysis by symbiont of host erythrocytes; P:modulation by symbiont of host process; P:hemolysis in another organism; P:disruption of cells of another organism; P:multi-organism cellular process; F:4-hydroxyphenylpyruvate dioxygenase activity; F:metal ion binding	EC:1.13.11.27	4-hydroxyphenylpyruvate dioxygenase	IPR029068 (G3DSA:3.10.180.GENE3D); IPR004360 (PFAM); IPR005956 (TIGRFAM); IPR005956 (PIRSF); PF14696 (PFAM); IPR029068 (G3DSA:3.10.180.GENE3D); PTHR11959:SF1 (PANTHER); IPR005956 (PANTHER); IPR037523 (PROSITE_PROFILES); IPR037523 (PROSITE_PROFILES); IPR041736 (CDD); IPR041735 (CDD); IPR029068 (SUPERFAMILY)	P:GO:0009072; F:GO:0003868; F:GO:0016701	P:aromatic amino acid family metabolic process; F:4-hydroxyphenylpyruvate dioxygenase activity; F:oxidoreductase activity, acting on single donors with incorporation of molecular oxygen
WP_003105929.1	MULTISPECIES: GGDEF domain-containing protein [Pseudomonas]	7	2	4	2	34.4	133	2	0	2	Yes	-1.05865	0.523085		-1.1254	0.215887		2.21502	0.000101582	Up	1.49021	0.0768529		PA3177		diguanylate cyclase	PA3177	-1.17646	0.070455	T	P:GO:0043709; P:GO:1902201; F:GO:0052621; C:GO:0005886	P:cell adhesion involved in single-species biofilm formation; P:negative regulation of bacterial-type flagellum-dependent cell motility; F:diguanylate cyclase activity; C:plasma membrane	EC:2.7.7.65	Diguanylate cyclase	IPR000160 (TIGRFAM); IPR043128 (G3DSA:3.30.70.GENE3D); IPR000160 (PFAM); mobidb-lite (MOBIDB_LITE); PTHR45138:SF9 (PANTHER); PTHR45138 (PANTHER); IPR000160 (PROSITE_PROFILES); IPR000160 (CDD); IPR029787 (SUPERFAMILY)	no GO terms	no GO terms
WP_003113441.1	MULTISPECIES: 6-phosphogluconolactonase [Pseudomonas]	42	8	29	8	25.6	1197	8	0	8	Yes	1.05446	0.0839521		1.84901	6.66994e-07	Up	2.21358	3.13342e-08	Up	-1.26768	0.000685658		PA3182	pgl	6-phosphogluconolactonase	pgl	1.13662	0.518351	G	P:GO:0005975; P:GO:0009051; F:GO:0017057; C:GO:0005737	P:carbohydrate metabolic process; P:pentose-phosphate shunt, oxidative branch; F:6-phosphogluconolactonase activity; C:cytoplasm	EC:3.1.1.31; EC:3.1.1.1	6-phosphogluconolactonase; Carboxylesterase	IPR006148 (PFAM); IPR005900 (TIGRFAM); G3DSA:3.40.50.1360 (GENE3D); PTHR11054:SF0 (PANTHER); IPR039104 (PANTHER); IPR005900 (CDD); IPR037171 (SUPERFAMILY)	P:GO:0005975; P:GO:0006098; F:GO:0017057	P:carbohydrate metabolic process; P:pentose-phosphate shunt; F:6-phosphogluconolactonase activity
WP_003100688.1	MULTISPECIES: hypothetical protein [Pseudomonas]	28	3	10	3	15.6	239	3	0	3	Yes	1.02286	0.394317		1.88291	2.26304e-07	Up	2.20042	5.9178e-09	Up	1.35622	1.9907e-05		PA3720		hypothetical protein	PA3720	-1.90649	1.15e-08						no IPS match	no IPS match	no IPS match
WP_003100571.1	MULTISPECIES: hydrolase [Pseudomonas]	40	6	17	6	19.9	738	6	0	6	Yes	1.00815	0.686692		1.59426	4.1846e-06	Up	2.19783	4.87539e-08	Up	-2.11986	4.02481e-07	Lower	PA3846		hypothetical protein	PA3846	1.20566	0.148321	Q	F:GO:0016787	F:hydrolase activity	EC:3	Hydrolases	IPR000868 (PFAM); IPR036380 (G3DSA:3.40.50.GENE3D); PTHR14119 (PANTHER); PTHR14119:SF3 (PANTHER); cd01012 (CDD); IPR036380 (SUPERFAMILY)	no GO terms	no GO terms
WP_003144386.1	pyrroloquinoline quinone biosynthesis protein B [Pseudomonas aeruginosa]	18	4	7	4	33	421	4	0	4	Yes	-1.05342	0.192345		1.70183	2.91219e-06	Up	2.19675	2.96345e-07	Up	1.25658	0.03284		PA1986	pqqB	pyrroloquinoline quinone biosynthesis protein B	pqqB	1.44761	0.0121943	S	P:GO:0018189	P:pyrroloquinoline quinone biosynthetic process			IPR001279 (PFAM); IPR011842 (TIGRFAM); IPR036866 (G3DSA:3.60.15.GENE3D); PTHR42663:SF7 (PANTHER); PTHR42663 (PANTHER); IPR011842 (HAMAP); IPR011842 (CDD); IPR036866 (SUPERFAMILY)	no GO terms	no GO terms
WP_023464890.1	L,D-transpeptidase [Pseudomonas aeruginosa]	43	9	25	9	34.8	482	9	0	9	Yes	-1.12656	0.0231761		1.57281	2.08956e-05	Up	2.1907	2.2442e-06	Up	-1.72021	7.95102e-06	Lower	PA2854		putative L,D-transpeptidase	PA2854	1.09661	0.301535	S	P:GO:0006508; P:GO:0018104; F:GO:0016740; F:GO:0071972	P:proteolysis; P:peptidoglycan-protein cross-linking; F:transferase activity; F:peptidoglycan L,D-transpeptidase activity	EC:3.4.21; EC:2; EC:3.4.16	Acting on peptide bonds (peptidases); Transferases; Acting on peptide bonds (peptidases)	IPR038063 (G3DSA:2.40.440.GENE3D); IPR005490 (PFAM); PTHR30582:SF24 (PANTHER); PTHR30582 (PANTHER); IPR018392 (CDD); IPR005490 (CDD); IPR038063 (SUPERFAMILY)	F:GO:0016740	F:transferase activity
WP_023465407.1	hypothetical protein [Pseudomonas aeruginosa]	16	3	8	3	26.2	231	3	0	3	Yes	1.08247	0.224238		1.68604	0.000535833	Up	2.18838	1.33679e-05	Up	-2.20056	5.89192e-06	Lower	PA5340		hypothetical protein	PA5340	1.37833	0.11499						mobidb-lite (MOBIDB_LITE); PS51257 (PROSITE_PROFILES)	no GO terms	no GO terms
WP_003100170.1	MULTISPECIES: alanine transaminase [Pseudomonas]	35	11	39	11	46	961	11	0	11	Yes	1.01355	0.639176		1.61395	1.70039e-06	Up	2.18761	2.46733e-07	Up	1.19313	0.00773789		PA4715		probable aminotransferase	PA4715	-1.2219	0.0982779	E	P:GO:0019272; P:GO:0030632; F:GO:0004021; F:GO:0010285; F:GO:0030170	P:L-alanine biosynthetic process from pyruvate; P:D-alanine biosynthetic process; F:L-alanine:2-oxoglutarate aminotransferase activity; F:L,L-diaminopimelate aminotransferase activity; F:pyridoxal phosphate binding	EC:2.6.1.12; EC:2.6.1.83; EC:2.6.1.2	Alanine--oxo-acid transaminase; LL-diaminopimelate aminotransferase; Alanine transaminase	IPR015422 (G3DSA:3.90.1150.GENE3D); IPR015421 (G3DSA:3.40.640.GENE3D); IPR004839 (PFAM); PTHR42832 (PANTHER); PTHR42832:SF1 (PANTHER); cd00609 (CDD); IPR015424 (SUPERFAMILY)	P:GO:0009058; F:GO:0003824; F:GO:0030170	P:biosynthetic process; F:catalytic activity; F:pyridoxal phosphate binding
WP_003103038.1	MULTISPECIES: PepSY domain-containing protein [Pseudomonas]	7	3	5	3	56.1	68	3	0	3	Yes	-1.05844	0.118468		1.21922	0.00354986		2.18457	5.85173e-06	Up	4.20843	0.000197733	Higher	PA0801		hypothetical protein	PA0801	-1.17003	0.307409	S	C:GO:0016021	C:integral component of membrane			IPR005625 (PFAM); PTHR34219:SF4 (PANTHER); IPR005625 (PANTHER)	no GO terms	no GO terms
WP_003093695.1	MULTISPECIES: 50S ribosomal protein L15 [Pseudomonas]	53	8	55	8	15.2	1507	8	0	8	Yes	-1.04236	0.194013		1.30254	0.000136806		2.18201	2.02499e-06	Up	-1.15179	0.00121048		PA4244	rplO	50S ribosomal protein L15	rplO	1.68356	0.116082	J	P:GO:0006412; F:GO:0003735; F:GO:0019843; C:GO:0005886	P:translation; F:structural constituent of ribosome; F:rRNA binding; C:plasma membrane			IPR005749 (TIGRFAM); IPR021131 (PFAM); G3DSA:3.100.10.10 (GENE3D); mobidb-lite (MOBIDB_LITE); IPR005749 (PANTHER); PTHR12934:SF11 (PANTHER); IPR001196 (PROSITE_PATTERNS); IPR030878 (HAMAP); IPR036227 (SUPERFAMILY)	P:GO:0006412; F:GO:0003735; C:GO:0005840; C:GO:0015934	P:translation; F:structural constituent of ribosome; C:ribosome; C:large ribosomal subunit
WP_003161775.1	MULTISPECIES: FKBP-type peptidyl-prolyl cis-trans isomerase [Pseudomonas]	48	5	17	5	16	481	5	0	5	Yes	-1.01969	0.749639		1.82457	4.93233e-05	Up	2.17707	0.000290169	Up	1.26903	0.00622499		PA4558		probable peptidyl-prolyl cis-trans isomerase, FkbP-type	PA4558	1.34179	0.0940784	G	P:GO:0000413; P:GO:0061077; F:GO:0003755; C:GO:0005829	P:protein peptidyl-prolyl isomerization; P:chaperone-mediated protein folding; F:peptidyl-prolyl cis-trans isomerase activity; C:cytosol	EC:5.2.1.8	Peptidylprolyl isomerase	IPR001179 (PFAM); G3DSA:3.10.50.40 (GENE3D); PTHR43811:SF49 (PANTHER); PTHR43811 (PANTHER); IPR001179 (PROSITE_PROFILES); SSF54534 (SUPERFAMILY)	F:GO:0003755	F:peptidyl-prolyl cis-trans isomerase activity
WP_003118206.1	MULTISPECIES: DUF692 domain-containing protein [Pseudomonas]	20	5	13	5	30.8	437	5	0	5	Yes	1.03529	0.223936		1.21363	0.00306773		2.17264	1.72081e-07	Up	6.02946	0.0276172	Higher	PA4106		conserved hypothetical protein	PA4106	1.42069	0.0084396	S					IPR007801 (PFAM); G3DSA:3.20.20.150 (GENE3D); IPR007801 (PANTHER); IPR007801 (HAMAP); IPR036237 (SUPERFAMILY)	no GO terms	no GO terms
WP_003119750.1	MULTISPECIES: type II secretion system protein N [Pseudomonas]	30	5	10	5	25.5	318	5	0	5	Yes	1.08962	0.23459		2.01459	0.000219124	Up	2.16757	0.00010838	Up	-2.00375	0.000205415	Lower	PA3104	xcpP	secretion protein XcpP	xcpP	-1.13659	0.203237	U	C:GO:0005886; C:GO:0015627; C:GO:0016021	C:plasma membrane; C:type II protein secretion system complex; C:integral component of membrane			Coil (COILS); IPR024961 (PFAM); G3DSA:2.30.30.830 (GENE3D); mobidb-lite (MOBIDB_LITE)	no GO terms	no GO terms
WP_003113661.1	MULTISPECIES: PA2169 family four-helix-bundle protein [Pseudomonas]	27	4	5	4	16.8	158	4	0	4	Yes	1.04777	0.694636		4.04653	0.000889803	Up	2.16191	0.0029818	Up	-4.40012	0.000999906	Lower	PA2169		hypothetical protein	PA2169	-1.05899	0.816864	S					IPR019052 (PFAM); IPR012347 (G3DSA:1.20.1260.GENE3D); IPR016920 (PIRSF); IPR011971 (TIGRFAM); IPR009078 (SUPERFAMILY)	no GO terms	no GO terms
WP_003105974.1	MULTISPECIES: D-alanyl-D-alanine endopeptidase [Pseudomonas]	15	3	4	3	34.1	193	3	0	3	Yes	1.0676	0.522888		1.51045	0.046192	Up	2.14564	0.0217115	Up	-1.73031	0.0481109	Lower	PA0869	pbpG	D-alanyl-D-alanine-endopeptidase	pbpG	1.25876	0.0517732	M	P:GO:0006508; P:GO:0008360; P:GO:0009410; P:GO:0043093; P:GO:0071555; F:GO:0004175; F:GO:0009002; C:GO:0042597	P:proteolysis; P:regulation of cell shape; P:response to xenobiotic stimulus; P:FtsZ-dependent cytokinesis; P:cell wall organization; F:endopeptidase activity; F:serine-type D-Ala-D-Ala carboxypeptidase activity; C:periplasmic space	EC:3.4.21; EC:3.4.16.4	Acting on peptide bonds (peptidases); Serine-type D-Ala-D-Ala carboxypeptidase	IPR018044 (PRINTS); IPR012338 (G3DSA:3.40.710.GENE3D); IPR001967 (PFAM); PTHR21581:SF26 (PANTHER); PTHR21581 (PANTHER); IPR012338 (SUPERFAMILY)	P:GO:0006508; F:GO:0009002	P:proteolysis; F:serine-type D-Ala-D-Ala carboxypeptidase activity
WP_003113864.1	MULTISPECIES: 1-deoxy-D-xylulose-5-phosphate reductoisomerase [Pseudomonas]	12	3	6	3	42.5	331	3	0	3	Yes	1.13727	0.374539		1.64788	0.0323651	Up	2.14324	0.0071845	Up	1.31359	0.214234		PA3650	dxr	1-deoxy-d-xylulose 5-phosphate reductoisomerase	dxr	1.0656	0.731297	I	P:GO:0051484; F:GO:0000287; F:GO:0005515; F:GO:0016853; F:GO:0030145; F:GO:0030604; F:GO:0050897; F:GO:0070402	P:isopentenyl diphosphate biosynthetic process, methylerythritol 4-phosphate pathway involved in terpenoid biosynthetic process; F:magnesium ion binding; F:protein binding; F:isomerase activity; F:manganese ion binding; F:1-deoxy-D-xylulose-5-phosphate reductoisomerase activity; F:cobalt ion binding; F:NADPH binding	EC:1.1.1.267; EC:5	1-deoxy-D-xylulose-5-phosphate reductoisomerase; Isomerases	G3DSA:1.10.1740.10 (GENE3D); IPR013644 (PFAM); IPR003821 (TIGRFAM); IPR003821 (PIRSF); IPR026877 (PFAM); G3DSA:3.40.50.720 (GENE3D); IPR013512 (PFAM); IPR003821 (PANTHER); IPR003821 (HAMAP); SSF55347 (SUPERFAMILY); IPR036291 (SUPERFAMILY); IPR036169 (SUPERFAMILY)	P:GO:0008299; F:GO:0005515; F:GO:0030604; F:GO:0046872; F:GO:0070402	P:isoprenoid biosynthetic process; F:protein binding; F:1-deoxy-D-xylulose-5-phosphate reductoisomerase activity; F:metal ion binding; F:NADPH binding
WP_003114542.1	MULTISPECIES: hypothetical protein [Pseudomonas]	11	3	10	3	34.7	251	3	0	3	Yes	-1.0849	0.0453882		-1.03815	0.433032		2.13406	1.33106e-05	Up	-1.52127	6.86606e-05	Lower	PA4993		hypothetical protein	PA4993	-1.43046	0.000253824	S					no IPS match	no IPS match	no IPS match
WP_003114425.1	MULTISPECIES: hypothetical protein [Pseudomonas]	33	3	5	3	9	115	3	0	3	Yes	1.00815	0.920519		1.14488	0.0248407		2.13107	6.01277e-05	Up															no IPS match	no IPS match	no IPS match
WP_023464902.1	MULTISPECIES: precorrin-3B synthase [Pseudomonas]	7	3	3	3	51.7	111	3	0	3	Yes	1.01294	0.998373		1.16693	0.520288		2.12681	0.0200009	Up	1.04376	0.829402		PA2906		probable oxidoreductase	PA2906	-1.34555	0.0223818	P	F:GO:0016002; F:GO:0020037; F:GO:0043818; F:GO:0046872; F:GO:0050311; F:GO:0051539	F:sulfite reductase activity; F:heme binding; F:precorrin-3B synthase activity; F:metal ion binding; F:sulfite reductase (ferredoxin) activity; F:4 iron, 4 sulfur cluster binding	EC:1.14.13.83; EC:1.8.7.1	Precorrin-3B synthase; Assimilatory sulfite reductase (ferredoxin)	IPR045854 (G3DSA:3.30.413.GENE3D); IPR006067 (PFAM); G3DSA:3.90.480.10 (GENE3D); IPR045854 (G3DSA:3.30.413.GENE3D); IPR005117 (PFAM); IPR012798 (TIGRFAM); PTHR11493:SF47 (PANTHER); IPR045169 (PANTHER); IPR036136 (SUPERFAMILY); IPR045854 (SUPERFAMILY); IPR045854 (SUPERFAMILY); IPR036136 (SUPERFAMILY)	F:GO:0016491; F:GO:0020037; F:GO:0051536	F:oxidoreductase activity; F:heme binding; F:iron-sulfur cluster binding
WP_003084710.1	MULTISPECIES: cold-shock protein [Pseudomonas]	62	4	28	4	7.7	762	4	0	4	Yes	-1.01778	0.836736		1.73963	0.00112922	Up	2.12336	0.000520122	Up	-1.45742	0.00489287		PA0456		probable cold-shock protein	PA0456	1.46889	0.0536134	K	F:GO:0003677; C:GO:0005737	F:DNA binding; C:cytoplasm			IPR002059 (PRINTS); G3DSA:6.20.370.130 (GENE3D); G3DSA:2.40.50.140 (GENE3D); IPR002059 (PFAM); IPR012156 (PIRSF); PTHR11544:SF126 (PANTHER); PTHR11544 (PANTHER); IPR019844 (PROSITE_PATTERNS); IPR002059 (PROSITE_PROFILES); IPR002059 (CDD); IPR012340 (SUPERFAMILY)	F:GO:0003676	F:nucleic acid binding
WP_023465007.1	peroxide stress protein YaaA [Pseudomonas aeruginosa]	43	9	22	9	29.6	689	9	0	9	Yes	-1.07568	0.00167592		1.53136	0.00118964	Up	2.10761	5.72698e-05	Up	1.29047	8.06462e-06		PA3539		conserved hypothetical protein	PA3539	-1.11682	0.225583	S	P:GO:0033194; C:GO:0005829	P:response to hydroperoxide; C:cytosol			IPR005583 (PFAM); IPR005583 (PANTHER); IPR005583 (HAMAP)	no GO terms	no GO terms
WP_003090435.1	MULTISPECIES: cold shock domain protein CspD [Pseudomonas]	52	2	7	2	9.6	268	2	0	2	Yes	1.06992	0.26214		3.00359	0.000299963	Up	2.09458	0.000200662	Up	-1.45854	0.00403442		PA2622	cspD	cold-shock protein CspD	cspD	1.34732	0.119267	K	P:GO:0006355; F:GO:0003676; C:GO:0005737	P:regulation of transcription, DNA-templated; F:nucleic acid binding; C:cytoplasm			IPR002059 (PRINTS); IPR012751 (TIGRFAM); IPR002059 (PFAM); G3DSA:2.40.50.140 (GENE3D); IPR012156 (PIRSF); mobidb-lite (MOBIDB_LITE); PTHR11544:SF113 (PANTHER); PTHR11544 (PANTHER); IPR019844 (PROSITE_PATTERNS); IPR002059 (PROSITE_PROFILES); IPR002059 (CDD); IPR012340 (SUPERFAMILY)	P:GO:0006355; F:GO:0003676; C:GO:0005737	P:regulation of transcription, DNA-templated; F:nucleic acid binding; C:cytoplasm
WP_003112878.1	MULTISPECIES: 4-deoxy-4-formamido-L-arabinose-phosphoundecaprenol deformylase ArnD [Pseudomonas]	25	8	13	8	32.9	263	8	0	8	Yes	1.0436	0.510466		1.32026	0.0105167		2.08407	7.75833e-05	Up	1.24873	0.0671584		PA3555	arnD	ArnD	arnD	1.45763	0.0587657	G	P:GO:0009103; P:GO:0009245; P:GO:0010041; P:GO:0036108; P:GO:0046677; F:GO:0016811	P:lipopolysaccharide biosynthetic process; P:lipid A biosynthetic process; P:response to iron(III) ion; P:4-amino-4-deoxy-alpha-L-arabinopyranosyl undecaprenyl phosphate biosynthetic process; P:response to antibiotic; F:hydrolase activity, acting on carbon-nitrogen (but not peptide) bonds, in linear amides	EC:3.5.1	Acting on carbon-nitrogen bonds, other than peptide bonds	IPR002509 (PFAM); G3DSA:3.20.20.370 (GENE3D); PTHR10587 (PANTHER); PTHR10587:SF105 (PANTHER); IPR023557 (HAMAP); IPR002509 (PROSITE_PROFILES); IPR011330 (SUPERFAMILY)	P:GO:0005975; F:GO:0003824; F:GO:0016810; F:GO:0016811	P:carbohydrate metabolic process; F:catalytic activity; F:hydrolase activity, acting on carbon-nitrogen (but not peptide) bonds; F:hydrolase activity, acting on carbon-nitrogen (but not peptide) bonds, in linear amides
WP_003106635.1	MULTISPECIES: N-acetylglutaminylglutamine amidotransferase [Pseudomonas]	35	18	35	18	66	1182	18	0	18	Yes	1.05983	0.0748204		1.69511	3.0051e-06	Up	2.0666	4.29544e-07	Up	-4.70812	1.26233e-06	Lower	PA3459		probable glutamine amidotransferase	PA3459	1.01719	0.904528	E	P:GO:0006529; P:GO:0006541; F:GO:0004066; F:GO:0005524; F:GO:0016740	P:asparagine biosynthetic process; P:glutamine metabolic process; F:asparagine synthase (glutamine-hydrolyzing) activity; F:ATP binding; F:transferase activity	EC:6.3.5.4; EC:2	Asparagine synthase (glutamine-hydrolyzing); Transferases	IPR014729 (G3DSA:3.40.50.GENE3D); IPR017932 (PFAM); IPR017535 (TIGRFAM); IPR029055 (G3DSA:3.60.20.GENE3D); IPR006426 (TIGRFAM); IPR006426 (PIRSF); IPR001962 (PFAM); PTHR43284:SF1 (PANTHER); PTHR43284 (PANTHER); IPR017932 (PROSITE_PROFILES); IPR033738 (CDD); IPR001962 (CDD); IPR029055 (SUPERFAMILY); SSF52402 (SUPERFAMILY)	P:GO:0006529; F:GO:0004066	P:asparagine biosynthetic process; F:asparagine synthase (glutamine-hydrolyzing) activity
WP_003083204.1	MULTISPECIES: GTP 3',8-cyclase MoaA [Pseudomonas]	11	4	7	4	37.2	144	4	0	4	Yes	1.02554	0.336149		1.03898	0.626048		2.06216	0.000261213	Up	0.7255	0.0810333		PA1505	moaA2	molybdopterin biosynthetic protein A2	moaA2	1.01535	0.931016	H	P:GO:0006777; F:GO:0005525; F:GO:0046872; F:GO:0051539; F:GO:0061798; F:GO:1904047; C:GO:0019008	P:Mo-molybdopterin cofactor biosynthetic process; F:GTP binding; F:metal ion binding; F:4 iron, 4 sulfur cluster binding; F:GTP 3',8'-cyclase activity; F:S-adenosyl-L-methionine binding; C:molybdopterin synthase complex	EC:4.1.99.22	GTP 3',8-cyclase	IPR007197 (PFAM); IPR010505 (PFAM); PF13353 (PFAM); IPR013483 (TIGRFAM); IPR013785 (G3DSA:3.20.20.GENE3D); SFLDG01216 (SFLD); SFLDG01383 (SFLD); PTHR22960:SF27 (PANTHER); PTHR22960 (PANTHER); IPR000385 (PROSITE_PATTERNS); IPR007197 (PROSITE_PROFILES); IPR013483 (HAMAP); cd01335 (CDD); SSF102114 (SUPERFAMILY)	P:GO:0006777; F:GO:0003824; F:GO:0046872; F:GO:0051536; F:GO:0051539; C:GO:0019008	P:Mo-molybdopterin cofactor biosynthetic process; F:catalytic activity; F:metal ion binding; F:iron-sulfur cluster binding; F:4 iron, 4 sulfur cluster binding; C:molybdopterin synthase complex
WP_003087924.1	MULTISPECIES: ATP-dependent Clp protease ATP-binding subunit ClpX [Pseudomonas]	45	16	64	16	47	1860	16	0	16	Yes	1.00204	0.928066		1.41712	3.8925e-05		2.05808	2.38112e-06	Up	1.27391	0.000627156		PA1802	clpX	ClpX	clpX	1.29095	0.0442311	O	P:GO:0006457; P:GO:0006508; P:GO:0030164; P:GO:0032272; P:GO:0043335; P:GO:0051301; F:GO:0002020; F:GO:0004176; F:GO:0005524; F:GO:0008270; F:GO:0016887; F:GO:0042802; F:GO:0046983; F:GO:0051082; F:GO:0097718; C:GO:0005618; C:GO:0005759; C:GO:0009376; C:GO:1904949	P:protein folding; P:proteolysis; P:protein denaturation; P:negative regulation of protein polymerization; P:protein unfolding; P:cell division; F:protease binding; F:ATP-dependent peptidase activity; F:ATP binding; F:zinc ion binding; F:ATP hydrolysis activity; F:identical protein binding; F:protein dimerization activity; F:unfolded protein binding; F:disordered domain specific binding; C:cell w…	EC:3.6.1; EC:3.4	Acting on acid anhydrides; Acting on peptide bonds (peptidases)	IPR003959 (PFAM); G3DSA:1.10.8.60 (GENE3D); IPR010603 (PFAM); IPR027417 (G3DSA:3.40.50.GENE3D); IPR004487 (TIGRFAM); IPR038366 (G3DSA:6.20.220.GENE3D); IPR019489 (PFAM); PTHR48102 (PANTHER); PTHR48102:SF7 (PANTHER); IPR004487 (HAMAP); IPR010603 (PROSITE_PROFILES); cd00009 (CDD); IPR027417 (SUPERFAMILY); SSF57716 (SUPERFAMILY)	P:GO:0006457; F:GO:0005524; F:GO:0008270; F:GO:0016887; F:GO:0046983; F:GO:0051082	P:protein folding; F:ATP binding; F:zinc ion binding; F:ATP hydrolysis activity; F:protein dimerization activity; F:unfolded protein binding
WP_003085085.1	MULTISPECIES: Co2+/Mg2+ efflux protein ApaG [Pseudomonas]	44	4	5	4	13.6	128	4	0	4	Yes	1.01251	0.802382		1.5298	0.0225088	Up	2.05711	0.00287282	Up	0.708296	0.0843568		PA0591		conserved hypothetical protein	PA0591	1.07319	0.593364	P					IPR007474 (PFAM); IPR036767 (G3DSA:2.60.40.GENE3D); PTHR14289 (PANTHER); IPR007474 (PROSITE_PROFILES); IPR023065 (HAMAP); IPR036767 (SUPERFAMILY)	no GO terms	no GO terms
WP_023465255.1	30S ribosomal protein S20 [Pseudomonas aeruginosa]	31	3	23	3	9.9	446	3	0	3	Yes	-1.07125	0.26869		1.24247	0.00924752		2.0516	1.3816e-05	Up				PA4563	rpsT	30S ribosomal protein S20	rpsT	-1.16414	0.13333	J	P:GO:0000028; P:GO:0006412; P:GO:0043086; F:GO:0003735; F:GO:0008073; F:GO:0070181	P:ribosomal small subunit assembly; P:translation; P:negative regulation of catalytic activity; F:structural constituent of ribosome; F:ornithine decarboxylase inhibitor activity; F:small ribosomal subunit rRNA binding			IPR002583 (PFAM); IPR002583 (TIGRFAM); IPR036510 (G3DSA:1.20.58.GENE3D); mobidb-lite (MOBIDB_LITE); IPR002583 (PANTHER); PTHR33398:SF1 (PANTHER); IPR002583 (HAMAP); IPR036510 (SUPERFAMILY)	P:GO:0006412; F:GO:0003723; F:GO:0003735; C:GO:0005840	P:translation; F:RNA binding; F:structural constituent of ribosome; C:ribosome
WP_003088567.1	MULTISPECIES: CoA transferase subunit B [Pseudomonas]	31	5	39	5	23.2	1160	5	0	5	Yes	1.07563	0.276917		1.55294	0.00147471	Up	2.05042	3.56409e-05	Up	1.07907	0.272547		PA2000	dhcB	dehydrocarnitine CoA transferase, subunit B	dhcB	1.56983	0.044463	I	P:GO:0042413; F:GO:0008260	P:carnitine catabolic process; F:3-oxoacid CoA-transferase activity	EC:2.8.3.5	3-oxoacid CoA-transferase	G3DSA:3.40.1080.10 (GENE3D); IPR012791 (TIGRFAM); IPR004165 (PFAM); IPR004165 (PANTHER); PTHR13707:SF23 (PANTHER); IPR004164 (PROSITE_PATTERNS); IPR037171 (SUPERFAMILY)	F:GO:0008410	F:CoA-transferase activity
WP_003093038.1	MULTISPECIES: PhoH family protein [Pseudomonas]	24	8	30	8	51.7	1075	8	0	8	Yes	1.08552	0.0694276		1.67769	1.47787e-06	Up	2.05031	2.67819e-07	Up	1.12037	0.00108258		PA3919		conserved hypothetical protein	PA3919	1.35549	0.0663859	T	F:GO:0005524; C:GO:0005829	F:ATP binding; C:cytosol			IPR002716 (PFAM); IPR027417 (G3DSA:3.40.50.GENE3D); IPR003714 (PFAM); G3DSA:3.40.50.1010 (GENE3D); PTHR30473:SF2 (PANTHER); PTHR30473 (PANTHER); cd09883 (CDD); IPR027417 (SUPERFAMILY); IPR029060 (SUPERFAMILY)	F:GO:0005524	F:ATP binding
WP_003118170.1	MULTISPECIES: ABC transporter [Pseudomonas]	12	2	3	2	29.5	75	2	0	2	Yes	-1.08896	0.13207		1.29135	0.00131106		2.04542	3.95646e-05	Up	2.41615	0.0269068	Higher	PA4195		putative amino acid ABC transporter substrate-binding protein				ET	C:GO:0030288	C:outer membrane-bounded periplasmic space			IPR001638 (PFAM); G3DSA:3.40.190.10 (GENE3D); G3DSA:3.40.190.10 (GENE3D); PTHR30085:SF6 (PANTHER); PTHR30085 (PANTHER); IPR018313 (PROSITE_PATTERNS); cd13689 (CDD); SSF53850 (SUPERFAMILY)	no GO terms	no GO terms
WP_023099228.1	DUF2076 domain-containing protein [Pseudomonas aeruginosa]	45	6	28	6	25	1183	6	0	6	Yes	1.03355	0.0958583		1.58586	6.49192e-08	Up	2.03487	7.32858e-08	Up				PA3952		hypothetical protein				S					Coil (COILS); IPR018648 (PFAM); mobidb-lite (MOBIDB_LITE); mobidb-lite (MOBIDB_LITE); mobidb-lite (MOBIDB_LITE)	no GO terms	no GO terms
WP_003112880.1	MULTISPECIES: undecaprenyl-phosphate 4-deoxy-4-formamido-L-arabinose transferase [Pseudomonas]	31	8	14	8	37.3	559	8	0	8	Yes	1.05547	0.0897254		-1.14212	0.00542322		2.03418	1.11084e-06	Up	1.00331	0.884861		PA3553	arnC	ArnC	arnC	1.25861	0.154472	M	P:GO:0009103; P:GO:0009245; P:GO:0036108; P:GO:0046677; F:GO:0016780; F:GO:0099621; C:GO:0005886; C:GO:0016021	P:lipopolysaccharide biosynthetic process; P:lipid A biosynthetic process; P:4-amino-4-deoxy-alpha-L-arabinopyranosyl undecaprenyl phosphate biosynthetic process; P:response to antibiotic; F:phosphotransferase activity, for other substituted phosphate groups; F:undecaprenyl-phosphate 4-deoxy-4-formamido-L-arabinose transferase activity; C:plasma membrane; C:integral component of membrane	EC:2.7.8; EC:2.4.2.53	Transferring phosphorus-containing groups; Undecaprenyl-phosphate 4-deoxy-4-formamido-L-arabinose transferase	IPR029044 (G3DSA:3.90.550.GENE3D); IPR001173 (PFAM); PTHR48090 (PANTHER); PTHR48090:SF3 (PANTHER); IPR022857 (HAMAP); cd04187 (CDD); IPR029044 (SUPERFAMILY)	F:GO:0016780	F:phosphotransferase activity, for other substituted phosphate groups
WP_003113835.1	MULTISPECIES: elastase [Pseudomonas]	12	4	8	4	53.7	410	4	0	4	Yes	1.22846	0.763717		1.74532	0.283608		2.03371	0.314077		-74.3783	5.42124e-05	Lower	PA3724	lasB	elastase LasB	lasB	-1.6733	0.123622	E	P:GO:0006508; P:GO:0043952; P:GO:0044010; P:GO:0071978; F:GO:0004222; F:GO:0046872; C:GO:0005576	P:proteolysis; P:protein transport by the Sec complex; P:single-species biofilm formation; P:bacterial-type flagellum-dependent swarming motility; F:metalloendopeptidase activity; F:metal ion binding; C:extracellular region	EC:3.4.24	Acting on peptide bonds (peptidases)	IPR023612 (PRINTS); IPR013856 (PFAM); IPR011096 (PFAM); G3DSA:3.10.450.40 (GENE3D); IPR027268 (G3DSA:1.10.390.GENE3D); IPR025711 (PFAM); IPR001570 (PFAM); G3DSA:3.10.450.490 (GENE3D); G3DSA:3.10.170.10 (GENE3D); PTHR33794:SF1 (PANTHER); PTHR33794 (PANTHER); cd09597 (CDD); SSF55486 (SUPERFAMILY)	P:GO:0006508; F:GO:0004222	P:proteolysis; F:metalloendopeptidase activity
WP_003093720.1	MULTISPECIES: 50S ribosomal protein L29 [Gammaproteobacteria]	38	2	15	2	7.2	473	2	0	2	Yes	1.07153	0.220859		1.60208	0.000404718	Up	2.03299	4.3829e-05	Up	-1.35104	0.00255029		PA4255	rpmC	50S ribosomal protein L29	rpmC	2.61825	0.00475353	J	P:GO:0000027; P:GO:0006414; F:GO:0003735; F:GO:0003746	P:ribosomal large subunit assembly; P:translational elongation; F:structural constituent of ribosome; F:translation elongation factor activity			IPR001854 (PFAM); IPR036049 (G3DSA:1.10.287.GENE3D); IPR001854 (TIGRFAM); PTHR10916 (PANTHER); PTHR10916:SF0 (PANTHER); IPR018254 (PROSITE_PATTERNS); IPR001854 (HAMAP); cd00427 (CDD); IPR036049 (SUPERFAMILY)	P:GO:0006412; F:GO:0003735; C:GO:0005840	P:translation; F:structural constituent of ribosome; C:ribosome
WP_003091943.1	MULTISPECIES: MarR family transcriptional regulator [Pseudomonas]	39	5	13	5	17.6	491	5	0	5	Yes	-1.00543	0.958743		1.34743	0.0627051		2.02543	0.0317402	Up	1.21047	0.244137		PA3458		probable transcriptional regulator	PA3458	1.26871	0.177912	K	P:GO:0006355; F:GO:0000976; F:GO:0003700	P:regulation of transcription, DNA-templated; F:transcription cis-regulatory region binding; F:DNA-binding transcription factor activity			IPR000835 (PRINTS); IPR000835 (PFAM); IPR036388 (G3DSA:1.10.10.GENE3D); PTHR33164 (PANTHER); PTHR33164:SF63 (PANTHER); IPR000835 (PROSITE_PROFILES); IPR011991 (CDD); IPR036390 (SUPERFAMILY)	P:GO:0006355; F:GO:0003700	P:regulation of transcription, DNA-templated; F:DNA-binding transcription factor activity
WP_016851605.1	MULTISPECIES: TIGR03761 family integrating conjugative element protein [Pseudomonas]	23	4	4	4	27.1	71	4	0	4	Yes	1.089	0.768572		1.45378	0.099274		2.01849	0.061787											S					Coil (COILS); IPR014996 (TIGRFAM); IPR014996 (PFAM); mobidb-lite (MOBIDB_LITE)	no GO terms	no GO terms
WP_003099343.1	MULTISPECIES: hypothetical protein [Pseudomonas]	67	5	13	5	10.8	512	5	0	5	Yes	-1.01382	0.761804		1.78195	4.2242e-05	Up	2.01694	0.000177586	Up				PA4642		hypothetical protein	PA4642	-1.00492	0.931986	S					no IPS match	no IPS match	no IPS match
WP_004345177.1	MULTISPECIES: GNAT family N-acetyltransferase [Pseudomonas]	14	3	8	3	24.2	258	3	0	3	Yes	1.07216	0.42617		1.68945	0.0010607	Up	2.01621	6.73503e-06	Up	3.41215	0.000504652	Higher	PA3368		probable acetyltransferase	PA3368	1.2814	0.000472394	K	F:GO:0008080; C:GO:0005737	F:N-acetyltransferase activity; C:cytoplasm	EC:2.3.1	Acyltransferases	IPR000182 (PFAM); G3DSA:3.40.630.30 (GENE3D); PTHR43877 (PANTHER); IPR000182 (PROSITE_PROFILES); cd04301 (CDD); IPR016181 (SUPERFAMILY)	F:GO:0008080	F:N-acetyltransferase activity
WP_003091802.1	MULTISPECIES: Arc family DNA-binding protein [Pseudomonas]	41	4	25	4	12.3	1198	4	0	4	Yes	1.06887	0.0744578		1.66002	9.48904e-05	Up	1.99928	3.04041e-07	Up	-1.527	7.61383e-05	Lower	PA3385	amrZ	alginate and motility regulator Z	amrZ	-1.18377	0.183172	S	P:GO:0032885; P:GO:0043107; P:GO:0044780; P:GO:0045892; P:GO:1900232; P:GO:1900233; P:GO:1902201; P:GO:2000147; F:GO:0000987; F:GO:0001217; C:GO:0032993	P:regulation of polysaccharide biosynthetic process; P:type IV pilus-dependent motility; P:bacterial-type flagellum assembly; P:negative regulation of transcription, DNA-templated; P:negative regulation of single-species biofilm formation on inanimate substrate; P:positive regulation of single-species biofilm formation on inanimate substrate; P:negative regulation of bacterial-type flagellum-depe…			IPR005569 (PFAM); IPR013321 (G3DSA:1.10.1220.GENE3D); IPR010985 (SUPERFAMILY)	P:GO:0006355; F:GO:0003677	P:regulation of transcription, DNA-templated; F:DNA binding
WP_049950173.1	hypothetical protein [Pseudomonas aeruginosa]	15	7	16	7	65.4	480	7	0	7	Yes	1.10605	0.0225696		2.13982	5.15241e-06	Up	1.98109	4.49963e-06	Up										L	P:GO:0006304; F:GO:0003677	P:DNA modification; F:DNA binding			Coil (COILS); IPR044946 (G3DSA:3.90.220.GENE3D); IPR000055 (PFAM); mobidb-lite (MOBIDB_LITE); PTHR43140 (PANTHER); cd17252 (CDD); cd17253 (CDD); SSF116734 (SUPERFAMILY); SSF116734 (SUPERFAMILY)	F:GO:0003677	F:DNA binding
WP_003092804.1	MULTISPECIES: type IV pilus biogenesis/stability protein PilW [Pseudomonas]	55	12	30	12	28.5	790	12	0	12	Yes	-1.04159	0.0448709		1.49732	1.54813e-05	Up	1.96365	4.79884e-07	Up	2.04509	7.91697e-05	Higher	PA3805	pilF	type 4 fimbrial biogenesis protein PilF	pilF	-1.26355	0.0140979	NU	F:GO:0005515	F:protein binding			IPR013360 (TIGRFAM); IPR011990 (G3DSA:1.25.40.GENE3D); PF13414 (PFAM); PF13424 (PFAM); PTHR45586 (PANTHER); PTHR45586:SF11 (PANTHER); IPR019734 (PROSITE_PROFILES); IPR019734 (PROSITE_PROFILES); PS51257 (PROSITE_PROFILES); PS50293 (PROSITE_PROFILES); IPR011990 (SUPERFAMILY)	F:GO:0005515	F:protein binding
WP_003113247.1	MULTISPECIES: malonyl-[acyl-carrier protein] O-methyltransferase BioC [Pseudomonas]	12	3	5	3	29.7	105	3	0	3	Yes	-1.04078	0.560561		1.3097	0.00188443		1.95585	0.0019539	Up	1.23835	0.0539258		PA0503		probable biotin synthesis protein BioC	PA0503	1.05275	0.757648	H	P:GO:0006805; P:GO:0009102; P:GO:0032259; F:GO:0010340; F:GO:0102130	P:xenobiotic metabolic process; P:biotin biosynthetic process; P:methylation; F:carboxyl-O-methyltransferase activity; F:malonyl-CoA methyltransferase activity	EC:2.1.1.197	Malonyl-[acyl-carrier protein] O-methyltransferase	IPR011814 (TIGRFAM); G3DSA:3.40.50.150 (GENE3D); IPR013216 (PFAM); PTHR43464:SF53 (PANTHER); PTHR43464 (PANTHER); IPR011814 (HAMAP); cd02440 (CDD); IPR029063 (SUPERFAMILY)	P:GO:0009102; F:GO:0008168; F:GO:0010340	P:biotin biosynthetic process; F:methyltransferase activity; F:carboxyl-O-methyltransferase activity
WP_023465244.1	ABC transporter ATP-binding protein [Pseudomonas aeruginosa]	13	3	4	3	36.3	81	3	0	3	Yes	1.00056	0.976632		1.15458	0.690253		1.95257	0.0291928	Up	-7.29799	0.000376339	Lower	PA4506	dppF	dipeptide ABC transporter ATP-binding protein DppF	PA4506	-1.85716	1.43e-05	P	P:GO:0035442; F:GO:0005524; F:GO:0016887; F:GO:0071916	P:dipeptide transmembrane transport; F:ATP binding; F:ATP hydrolysis activity; F:dipeptide transmembrane transporter activity	EC:3.6.1; EC:7	Acting on acid anhydrides; Translocases	IPR013563 (TIGRFAM); IPR027417 (G3DSA:3.40.50.GENE3D); IPR013563 (PFAM); IPR003439 (PFAM); PTHR43776 (PANTHER); PTHR43776:SF6 (PANTHER); IPR017871 (PROSITE_PATTERNS); IPR003439 (PROSITE_PROFILES); cd03257 (CDD); IPR027417 (SUPERFAMILY)	P:GO:0015833; F:GO:0000166; F:GO:0005524	P:peptide transport; F:nucleotide binding; F:ATP binding
WP_023096871.1	MULTISPECIES: nicotinate-nucleotide--dimethylbenzimidazole phosphoribosyltransferase [Pseudomonas]	9	3	8	3	36.5	231	3	0	3	Yes	-1.16001	0.128143		1.50426	0.0056182	Up	1.95097	0.000241063	Up				PA1279	cobU	nicotinate-nucleotide--dimethylbenzimidazole phosphoribosyltransferase	cobU	1.74439	0.0439703	F	P:GO:0009163; P:GO:0009236; F:GO:0008939	P:nucleoside biosynthetic process; P:cobalamin biosynthetic process; F:nicotinate-nucleotide-dimethylbenzimidazole phosphoribosyltransferase activity	EC:2.4.2.21	Nicotinate-nucleotide--dimethylbenzimidazole phosphoribosyltransferase	IPR036087 (G3DSA:3.40.50.GENE3D); IPR017846 (TIGRFAM); IPR003200 (PFAM); IPR023195 (G3DSA:1.10.1610.GENE3D); PTHR43463 (PANTHER); IPR017846 (HAMAP); IPR003200 (CDD); IPR036087 (SUPERFAMILY)	P:GO:0009236; F:GO:0008939	P:cobalamin biosynthetic process; F:nicotinate-nucleotide-dimethylbenzimidazole phosphoribosyltransferase activity
WP_003091832.1	MULTISPECIES: ferredoxin--NADP reductase [Pseudomonas]	34	8	33	8	29.5	592	8	0	8	Yes	-1.03469	0.571009		1.51137	0.000184605	Up	1.94489	1.6213e-05	Up	-1.76185	0.000597263	Lower	PA3397	fprA	FprA				C	P:GO:0034599; P:GO:0042167; F:GO:0000166; F:GO:0004324	P:cellular response to oxidative stress; P:heme catabolic process; F:nucleotide binding; F:ferredoxin-NADP+ reductase activity	EC:1.18.1.2	Ferredoxin--NADP(+) reductase	IPR001709 (PRINTS); G3DSA:2.40.30.10 (GENE3D); IPR008333 (PFAM); IPR039261 (G3DSA:3.40.50.GENE3D); IPR001433 (PFAM); PTHR47878:SF1 (PANTHER); PTHR47878 (PANTHER); IPR017927 (PROSITE_PROFILES); IPR033892 (CDD); IPR039261 (SUPERFAMILY); IPR017938 (SUPERFAMILY)	F:GO:0004324; F:GO:0016491	F:ferredoxin-NADP+ reductase activity; F:oxidoreductase activity
WP_003101422.1	MULTISPECIES: ABC transporter ATP-binding protein [Pseudomonas]	34	9	20	9	28.4	496	9	0	9	Yes	1.08358	0.0550793		1.65151	3.43241e-05	Up	1.94005	5.94764e-06	Up	2.22324	0.000149721	Higher	PA2912		probable ATP-binding component of ABC transporter	PA2912	-1.03649	0.80387	HP	F:GO:0005524; F:GO:0016887	F:ATP binding; F:ATP hydrolysis activity	EC:3.6.1	Acting on acid anhydrides	IPR003439 (PFAM); IPR027417 (G3DSA:3.40.50.GENE3D); PTHR42794 (PANTHER); PTHR42794:SF2 (PANTHER); IPR017871 (PROSITE_PATTERNS); IPR003439 (PROSITE_PROFILES); cd03214 (CDD); IPR027417 (SUPERFAMILY)	F:GO:0005524	F:ATP binding
WP_003095627.1	MULTISPECIES: 50S ribosomal protein L9 [Pseudomonas]	70	9	109	9	15.5	2790	9	0	9	Yes	1.00513	0.784798		1.29061	6.63184e-05		1.92951	7.05361e-06	Up	0.948632	0.146165		PA4932	rplI	50S ribosomal protein L9	rplI	2.14197	0.0483771	J	P:GO:0006412; F:GO:0003735; F:GO:0070180; C:GO:0005618; C:GO:0005886	P:translation; F:structural constituent of ribosome; F:large ribosomal subunit rRNA binding; C:cell wall; C:plasma membrane			Coil (COILS); IPR036791 (G3DSA:3.10.430.GENE3D); IPR020069 (PFAM); IPR036935 (G3DSA:3.40.5.GENE3D); IPR020070 (PFAM); IPR020594 (TIGRFAM); IPR000244 (PANTHER); IPR020070 (PROSITE_PATTERNS); IPR020594 (HAMAP); IPR036791 (SUPERFAMILY); IPR009027 (SUPERFAMILY)	P:GO:0006412; F:GO:0003735; C:GO:0005840	P:translation; F:structural constituent of ribosome; C:ribosome
WP_003124542.1	membrane protein [Pseudomonas aeruginosa]	24	9	16	9	51	416	9	0	9	Yes	-1.06906	0.0599207		1.26027	0.000590192		1.92459	4.57729e-05	Up	6.86456	0.00227229	Higher	PA2548		hypothetical protein	PA2548	1.1732	0.353712	MP	C:GO:0016020	C:membrane			IPR024370 (PFAM); IPR036737 (G3DSA:3.30.1330.GENE3D); IPR006665 (PFAM); G3DSA:3.40.190.10 (GENE3D); G3DSA:3.40.190.10 (GENE3D); PTHR30570 (PANTHER); PTHR30570:SF6 (PANTHER); IPR006665 (PROSITE_PROFILES); cd13653 (CDD); IPR006665 (CDD); SSF53850 (SUPERFAMILY); IPR036737 (SUPERFAMILY)	no GO terms	no GO terms
WP_023464287.1	peptidylprolyl isomerase [Pseudomonas aeruginosa]	26	7	13	7	33.7	474	7	0	7	Yes	-1.05117	0.446846		1.54956	5.42687e-05	Up	1.9176	0.000661162	Up	1.43277	0.015207		PA0699		probable peptidyl-prolyl cis-trans isomerase, PpiC-type	PA0699	1.58952	0.0902493	M	P:GO:0000413; F:GO:0003755	P:protein peptidyl-prolyl isomerization; F:peptidyl-prolyl cis-trans isomerase activity	EC:5.2.1.8	Peptidylprolyl isomerase	IPR000297 (PFAM); G3DSA:3.10.50.40 (GENE3D); PTHR47245 (PANTHER); PTHR47245:SF2 (PANTHER); IPR023058 (PROSITE_PATTERNS); IPR000297 (PROSITE_PROFILES); PS51257 (PROSITE_PROFILES); SSF54534 (SUPERFAMILY)	F:GO:0003755	F:peptidyl-prolyl cis-trans isomerase activity
WP_003091792.1	MULTISPECIES: phosphonate metabolism transcriptional regulator PhnF [Pseudomonas]	36	7	16	7	27	525	7	0	7	Yes	1.09109	0.00896156		1.76629	0.000374548	Up	1.91722	0.000518283	Up	2.07735	0.0788601		PA3381		probable transcriptional regulator	PA3381	-1.07933	0.795489	K	P:GO:0045892; F:GO:0003677; F:GO:0003700	P:negative regulation of transcription, DNA-templated; F:DNA binding; F:DNA-binding transcription factor activity			IPR000524 (PRINTS); IPR028978 (G3DSA:3.40.1410.GENE3D); IPR036388 (G3DSA:1.10.10.GENE3D); IPR012702 (TIGRFAM); IPR000524 (PFAM); IPR011663 (PFAM); PTHR44846:SF1 (PANTHER); PTHR44846 (PANTHER); IPR000524 (PROSITE_PROFILES); IPR000524 (CDD); IPR028978 (SUPERFAMILY); IPR036390 (SUPERFAMILY)	P:GO:0006355; F:GO:0003677; F:GO:0003700	P:regulation of transcription, DNA-templated; F:DNA binding; F:DNA-binding transcription factor activity
WP_003098594.1	MULTISPECIES: zinc metalloprotease [Pseudomonas]	18	7	17	7	48.5	610	7	0	7	Yes	1.09682	0.499352		1.26268	0.164748		1.91326	0.0152765	Up	0.960117	0.66532		PA3649	mucP	MucP	PA3649	1.12035	0.583797	M	P:GO:0006508; P:GO:0007165; P:GO:0010628; P:GO:0045893; F:GO:0004222; F:GO:0043856; F:GO:0045152; F:GO:0046872; C:GO:0005887	P:proteolysis; P:signal transduction; P:positive regulation of gene expression; P:positive regulation of transcription, DNA-templated; F:metalloendopeptidase activity; F:anti-sigma factor antagonist activity; F:antisigma factor binding; F:metal ion binding; C:integral component of plasma membrane	EC:3.4.24	Acting on peptide bonds (peptidases)	IPR001478 (PFAM); IPR036034 (G3DSA:2.30.42.GENE3D); IPR041489 (PFAM); IPR008915 (PFAM); IPR036034 (G3DSA:2.30.42.GENE3D); IPR004387 (TIGRFAM); PTHR42837:SF2 (PANTHER); IPR004387 (PANTHER); cd06163 (CDD); cd00989 (CDD); cd06163 (CDD); cd00989 (CDD); IPR036034 (SUPERFAMILY); IPR036034 (SUPERFAMILY)	P:GO:0006508; F:GO:0004222; F:GO:0005515; C:GO:0016021	P:proteolysis; F:metalloendopeptidase activity; F:protein binding; C:integral component of membrane
WP_003094769.1	MULTISPECIES: FKBP-type peptidyl-prolyl cis-trans isomerase [Pseudomonas]	45	7	28	7	21.8	1099	7	0	7	Yes	1.00363	0.966601		1.49538	0.000179509	Up	1.90007	6.92873e-07	Up	-1.21834	0.00112464		PA4572	fklB	peptidyl-prolyl cis-trans isomerase FklB	fklB	1.06703	0.749309	G	P:GO:0000413; P:GO:0006457; F:GO:0003755; F:GO:0005528; F:GO:0042802; C:GO:0005829	P:protein peptidyl-prolyl isomerization; P:protein folding; F:peptidyl-prolyl cis-trans isomerase activity; F:FK506 binding; F:identical protein binding; C:cytosol	EC:5.2.1.8	Peptidylprolyl isomerase	IPR001179 (PFAM); IPR000774 (PFAM); IPR036944 (G3DSA:1.10.287.GENE3D); G3DSA:3.10.50.40 (GENE3D); PTHR43811:SF23 (PANTHER); PTHR43811 (PANTHER); IPR001179 (PROSITE_PROFILES); SSF54534 (SUPERFAMILY)	P:GO:0006457; F:GO:0003755	P:protein folding; F:peptidyl-prolyl cis-trans isomerase activity
WP_003095041.1	MULTISPECIES: hypothetical protein [Pseudomonas]	26	5	9	5	26.3	346	5	0	5	Yes	1.01636	0.827265		1.33836	0.00504382		1.89865	0.000114382	Up	1.19785	0.0379254		PA4685		hypothetical protein	PA4685	-1.06417	0.550871	S					IPR042038 (G3DSA:1.10.10.GENE3D); mobidb-lite (MOBIDB_LITE); mobidb-lite (MOBIDB_LITE)	no GO terms	no GO terms
WP_003091144.1	MULTISPECIES: DUF177 domain-containing protein [Pseudomonas]	21	3	16	3	19.6	560	3	0	3	Yes	1.01872	0.564347		1.51638	3.85785e-05	Up	1.89828	4.24735e-06	Up	1.3472	0.0144495		PA2971		conserved hypothetical protein	PA2971	1.04223	0.815355	S	C:GO:0005829	C:cytosol			IPR003772 (PFAM); IPR039255 (PANTHER)	no GO terms	no GO terms
WP_023464998.1	acetyl-CoA C-acyltransferase [Pseudomonas aeruginosa]	14	3	5	3	42	247	3	0	3	Yes	1.01262	0.768735		1.60511	9.88188e-06	Up	1.89771	5.00305e-06	Up	-1.21621	0.0134682		PA3454		probable acyl-CoA thiolase	PA3454	1.16076	0.320168	I	F:GO:0003985	F:acetyl-CoA C-acetyltransferase activity	EC:2.3.1.16; EC:2.3.1.9	Acetyl-CoA C-acyltransferase; Acetyl-CoA C-acetyltransferase	IPR020617 (PFAM); IPR016039 (G3DSA:3.40.47.GENE3D); IPR020616 (PFAM); IPR002155 (PIRSF); IPR016039 (G3DSA:3.40.47.GENE3D); IPR002155 (TIGRFAM); PTHR43853:SF6 (PANTHER); PTHR43853 (PANTHER); IPR020610 (PROSITE_PATTERNS); IPR020613 (PROSITE_PATTERNS); IPR020615 (PROSITE_PATTERNS); IPR002155 (CDD); IPR016039 (SUPERFAMILY); IPR016039 (SUPERFAMILY)	F:GO:0016746; F:GO:0016747	F:acyltransferase activity; F:acyltransferase activity, transferring groups other than amino-acyl groups
WP_003087926.1	MULTISPECIES: endopeptidase La [Pseudomonas]	42	30	117	30	88.6	3185	30	0	30	Yes	1.01986	0.431968		1.24382	0.000813177		1.88672	2.17428e-07	Up	0.987147	0.562879		PA1803	lon	Lon protease	lon	1.53449	0.0164118	O	P:GO:0006515; P:GO:0009410; P:GO:0010165; P:GO:0030254; P:GO:0034605; P:GO:0043107; P:GO:0044010; P:GO:0071236; P:GO:0071977; P:GO:0071978; F:GO:0004176; F:GO:0004252; F:GO:0005524; F:GO:0016887; F:GO:0043565; C:GO:0005829	P:protein quality control for misfolded or incompletely synthesized proteins; P:response to xenobiotic stimulus; P:response to X-ray; P:protein secretion by the type III secretion system; P:cellular response to heat; P:type IV pilus-dependent motility; P:single-species biofilm formation; P:cellular response to antibiotic; P:bacterial-type flagellum-dependent swimming motility; P:bacterial-type fl…	EC:3.4.21; EC:3.6.1	Acting on peptide bonds (peptidases); Acting on acid anhydrides	Coil (COILS); PR00830 (PRINTS); IPR004815 (TIGRFAM); G3DSA:2.30.130.40 (GENE3D); IPR004815 (PIRSF); IPR008269 (PFAM); G3DSA:1.20.58.1480 (GENE3D); IPR027417 (G3DSA:3.40.50.GENE3D); IPR003111 (PFAM); G3DSA:1.20.5.5270 (GENE3D); IPR003959 (PFAM); IPR014721 (G3DSA:3.30.230.GENE3D); G3DSA:1.10.8.60 (GENE3D); mobidb-lite (MOBIDB_LITE); mobidb-lite (MOBIDB_LITE); PTHR10046:SF56 (PANTHER); IPR027065 (PA…	P:GO:0006508; P:GO:0030163; F:GO:0004176; F:GO:0004252; F:GO:0005524; F:GO:0016887; F:GO:0043565	P:proteolysis; P:protein catabolic process; F:ATP-dependent peptidase activity; F:serine-type endopeptidase activity; F:ATP binding; F:ATP hydrolysis activity; F:sequence-specific DNA binding
WP_003096934.1	MULTISPECIES: N-acetyltransferase [Pseudomonas]	27	4	18	4	21	589	4	0	4	Yes	1.09487	0.194954		1.54467	0.000374634	Up	1.8864	4.44455e-05	Up	3.86358	0.00179341	Higher	PA5475		hypothetical protein	PA5475	1.38583	0.100708	K	F:GO:0008080	F:N-acetyltransferase activity	EC:2.3.1	Acyltransferases	G3DSA:3.40.630.30 (GENE3D); IPR000182 (PROSITE_PROFILES); IPR016181 (SUPERFAMILY)	F:GO:0008080	F:N-acetyltransferase activity
WP_003086049.1	MULTISPECIES: DUF2058 family protein [Pseudomonas]	26	5	18	5	20.8	422	5	0	5	Yes	-1.07275	0.0990151		1.60208	3.62507e-05	Up	1.88443	9.3775e-06	Up	1.05706	0.15067		PA0937		conserved hypothetical protein	PA0937	1.32735	0.0637888	S					Coil (COILS); Coil (COILS); IPR018636 (PFAM); mobidb-lite (MOBIDB_LITE); mobidb-lite (MOBIDB_LITE)	no GO terms	no GO terms
WP_023464977.1	phospholipase C, phosphocholine-specific [Pseudomonas aeruginosa]	25	14	33	14	77	775	14	0	14	Yes	1.03372	0.166343		-1.57576	1.6079e-05	Down	1.88409	7.37235e-06	Up	1.74449	0.000490963	Higher	PA3319	plcN	non-hemolytic phospholipase C precursor	plcN	-1.36602	0.144815	M	P:GO:0016042; F:GO:0034480	P:lipid catabolic process; F:phosphatidylcholine phospholipase C activity	EC:3.1.4.3; EC:3.1.1	Phospholipase C; Acting on ester bonds	IPR007312 (PFAM); IPR008475 (PFAM); IPR017850 (G3DSA:3.40.720.GENE3D); IPR017767 (TIGRFAM); mobidb-lite (MOBIDB_LITE); PTHR31956:SF28 (PANTHER); IPR007312 (PANTHER); IPR006311 (PROSITE_PROFILES); cd16014 (CDD)	P:GO:0016042; F:GO:0003824; F:GO:0004629; F:GO:0016788; F:GO:0034480	P:lipid catabolic process; F:catalytic activity; F:phospholipase C activity; F:hydrolase activity, acting on ester bonds; F:phosphatidylcholine phospholipase C activity
WP_023464954.1	sodium:alanine symporter family protein [Pseudomonas aeruginosa]	10	3	5	3	51.5	168	3	0	3	Yes	-1.08053	0.395969		-1.06931	0.402618		1.88321	0.000299778	Up	0.986201	0.840033		PA2252		probable AGCS sodium/alanine/glycine symporter	PA2252	1.26451	0.066508	E	P:GO:0006814; P:GO:0032328; P:GO:0055085; F:GO:0015655; C:GO:0005886; C:GO:0016021	P:sodium ion transport; P:alanine transport; P:transmembrane transport; F:alanine:sodium symporter activity; C:plasma membrane; C:integral component of membrane	EC:7	Translocases	IPR001463 (PRINTS); IPR001463 (PFAM); IPR001463 (TIGRFAM); G3DSA:1.20.1740.10 (GENE3D); mobidb-lite (MOBIDB_LITE); PTHR30330:SF1 (PANTHER); IPR001463 (PANTHER); IPR001463 (PROSITE_PATTERNS)	P:GO:0006814; P:GO:0032328; F:GO:0015655; C:GO:0016020	P:sodium ion transport; P:alanine transport; F:alanine:sodium symporter activity; C:membrane
WP_003094139.1	MULTISPECIES: penicillin-binding protein 3 [Pseudomonas]	32	17	36	17	62.8	728	17	0	17	Yes	1.21232	1.87168e-05		1.81464	4.61671e-07	Up	1.88205	2.07066e-07	Up	2.37901	3.97413e-05	Higher	PA4418	ftsI	penicillin-binding protein 3	ftsI	1.21109	0.00885053	M	P:GO:0000917; P:GO:0006508; P:GO:0008360; P:GO:0043093; P:GO:0071555; F:GO:0008658; F:GO:0008955; F:GO:0009002; C:GO:0005887	P:division septum assembly; P:proteolysis; P:regulation of cell shape; P:FtsZ-dependent cytokinesis; P:cell wall organization; F:penicillin binding; F:peptidoglycan glycosyltransferase activity; F:serine-type D-Ala-D-Ala carboxypeptidase activity; C:integral component of plasma membrane	EC:3.4.21; EC:2.4.1.129; EC:3.4.16.4	Acting on peptide bonds (peptidases); Peptidoglycan glycosyltransferase; Serine-type D-Ala-D-Ala carboxypeptidase	G3DSA:3.90.1310.10 (GENE3D); G3DSA:3.30.450.330 (GENE3D); IPR005311 (PFAM); IPR012338 (G3DSA:3.40.710.GENE3D); IPR001460 (PFAM); mobidb-lite (MOBIDB_LITE); PTHR30627 (PANTHER); PTHR30627:SF1 (PANTHER); IPR037532 (HAMAP); IPR036138 (SUPERFAMILY); IPR012338 (SUPERFAMILY)	P:GO:0009252; P:GO:0051301; F:GO:0008658; F:GO:0008955; C:GO:0005887	P:peptidoglycan biosynthetic process; P:cell division; F:penicillin binding; F:peptidoglycan glycosyltransferase activity; C:integral component of plasma membrane
WP_003114879.1	MULTISPECIES: DUF3857 domain-containing protein [Pseudomonas]	39	21	41	21	70	1051	21	0	21	Yes	-1.04062	0.305765		1.50558	3.28766e-05	Up	1.88073	3.0402e-07	Up	1.14631	0.00790002		PA2044		hypothetical protein	PA2044	1.07341	0.329792	E	P:GO:0006508; F:GO:0008233	P:proteolysis; F:peptidase activity	EC:3.4	Acting on peptide bonds (peptidases)	G3DSA:3.10.620.30 (GENE3D); IPR002931 (PFAM); IPR024618 (PFAM); G3DSA:2.60.40.3140 (GENE3D); mobidb-lite (MOBIDB_LITE); IPR038765 (SUPERFAMILY)	no GO terms	no GO terms
WP_003087448.1	MULTISPECIES: dienelactone hydrolase family protein [Pseudomonas]	34	6	25	6	25.8	958	6	0	6	Yes	1.074	0.312011		1.86376	0.000224636	Up	1.87483	0.000290449	Up	-1.39212	0.00708102		PA1597		hypothetical protein	PA1597	1.16784	0.449998	Q	F:GO:0016787	F:hydrolase activity	EC:3	Hydrolases	IPR002925 (PFAM); IPR029058 (G3DSA:3.40.50.GENE3D); PTHR22946 (PANTHER); PTHR22946:SF4 (PANTHER); PTHR22946:SF4 (PANTHER); PTHR22946 (PANTHER); IPR029058 (SUPERFAMILY)	F:GO:0016787	F:hydrolase activity
WP_003099002.1	MULTISPECIES: hypothetical protein [Pseudomonas]	56	8	22	8	19.4	394	8	0	8	Yes	-1.00944	0.818784		1.42239	0.00161675		1.87051	9.24774e-06	Up	1.06012	0.182891		PA2582		hypothetical protein	PA2582	1.09867	0.313034	T	P:GO:0010608; F:GO:0033592; F:GO:0034057; C:GO:0005829	P:posttranscriptional regulation of gene expression; F:RNA strand annealing activity; F:RNA strand-exchange activity; C:cytosol			Coil (COILS); IPR016103 (PFAM); IPR036442 (G3DSA:1.10.1710.GENE3D); mobidb-lite (MOBIDB_LITE); mobidb-lite (MOBIDB_LITE); mobidb-lite (MOBIDB_LITE); IPR023529 (PANTHER); cd00236 (CDD); IPR036442 (SUPERFAMILY)	P:GO:0010608; F:GO:0003723; F:GO:0033592; F:GO:0034057	P:posttranscriptional regulation of gene expression; F:RNA binding; F:RNA strand annealing activity; F:RNA strand-exchange activity
WP_003119314.1	MULTISPECIES: hypothetical protein [Pseudomonas]	10	2	2	2	24.7	63	2	0	2	Yes	-1.089	0.764405		1.46016	0.233519		1.8635	0.10585		1.65167	0.266669		PA3740		hypothetical protein	PA3740	-1.12563	0.325479	S					IPR037257 (SUPERFAMILY)	no GO terms	no GO terms
WP_003086047.1	MULTISPECIES: lipid A hydroxylase LpxO2 [Pseudomonas]	45	13	25	13	35.7	736	13	0	13	Yes	1.01638	0.684863		1.25915	0.0180783		1.84168	0.000857514	Up	1.07305	0.543612		PA0936	lpxO2	lipopolysaccharide biosynthetic protein LpxO2	lpxO2	1.01001	0.930559	O	P:GO:0042264; F:GO:0062101; C:GO:0016021	P:peptidyl-aspartic acid hydroxylation; F:peptidyl-aspartic acid 3-dioxygenase activity; C:integral component of membrane	EC:1.14.11.16	Peptide-aspartate beta-dioxygenase	IPR027443 (G3DSA:2.60.120.GENE3D); IPR007803 (PFAM); PTHR46332 (PANTHER); PTHR46332:SF5 (PANTHER); SSF51197 (SUPERFAMILY)	P:GO:0018193	P:peptidyl-amino acid modification
WP_003086400.1	MULTISPECIES: DUF2288 family protein [Pseudomonas]	21	2	3	2	11.3	99	2	0	2	Yes	-1.01828	0.894507		1.45257	0.0130904		1.83299	0.00210401	Up	1.1052	0.489548		PA1075		hypothetical protein	PA1075	1.11153	0.552035	S					IPR018741 (PFAM)	no GO terms	no GO terms
WP_003122573.1	MULTISPECIES: FMN oxidoreductase [Pseudomonas]	16	5	9	5	44.6	260	5	0	5	Yes	-1.06259	0.42897		-1.22659	0.0360869		1.83153	0.000305001	Up	3.28483	0.0506973	Higher	PA2716		probable FMN oxidoreductase	PA2716	1.12714	0.252997	C	F:GO:0010181; F:GO:0016491	F:FMN binding; F:oxidoreductase activity	EC:1	Oxidoreductases	IPR001155 (PFAM); IPR013785 (G3DSA:3.20.20.GENE3D); PTHR43656:SF2 (PANTHER); PTHR43656 (PANTHER); cd04733 (CDD); SSF51395 (SUPERFAMILY)	F:GO:0003824; F:GO:0010181; F:GO:0016491	F:catalytic activity; F:FMN binding; F:oxidoreductase activity
WP_003100063.1	MULTISPECIES: nitroreductase family protein [Pseudomonas]	27	5	13	5	22.4	311	5	0	5	Yes	-1.04617	0.304315		1.08723	0.0317329		1.83077	6.49171e-06	Up	5.89077	0.000101738	Higher	PA5190		NAD(P)H quinone oxidoreductase	PA5190	1.23053	0.103392	C	F:GO:0003955	F:NAD(P)H dehydrogenase (quinone) activity	EC:1.6.5.2	NAD(P)H dehydrogenase (quinone)	IPR000415 (G3DSA:3.40.109.GENE3D); IPR029479 (PFAM); PTHR43673 (PANTHER); PTHR43673:SF8 (PANTHER); cd02137 (CDD); IPR000415 (SUPERFAMILY)	F:GO:0016491	F:oxidoreductase activity
WP_031628111.1	MULTISPECIES: YggU family protein [Pseudomonas]	45	4	5	4	11	159	4	0	4	Yes	1.05914	0.223066		1.49682	0.00121676	Up	1.8168	4.83112e-05	Up										S					IPR003746 (PFAM); IPR036591 (G3DSA:3.30.1200.GENE3D); IPR005228 (TIGRFAM); IPR003746 (PANTHER); IPR003746 (HAMAP); IPR036591 (SUPERFAMILY)	no GO terms	no GO terms
WP_047925767.1	MULTISPECIES: hypothetical protein [Pseudomonas]	46	5	10	5	10.1	156	5	0	5	Yes	1.02714	0.423966		1.63585	2.13404e-05	Up	1.81481	3.08255e-05	Up											F:GO:0003677	F:DNA binding			IPR010982 (G3DSA:1.10.260.GENE3D); mobidb-lite (MOBIDB_LITE); mobidb-lite (MOBIDB_LITE)	F:GO:0003677	F:DNA binding
WP_003092809.1	MULTISPECIES: 23S rRNA (adenine(2503)-C(2))-methyltransferase RlmN [Pseudomonas]	26	9	12	9	41.7	320	9	0	9	Yes	1.00969	0.871715		1.01996	0.735318		1.81127	0.000327116	Up	0.962973	0.542996		PA3806		conserved hypothetical protein	PA3806	-1.18147	0.208288	J	P:GO:0030488; P:GO:0070475; F:GO:0000049; F:GO:0002935; F:GO:0019843; F:GO:0046872; F:GO:0051539; F:GO:0070040; C:GO:0005829	P:tRNA methylation; P:rRNA base methylation; F:tRNA binding; F:tRNA (adenine-C2-)-methyltransferase activity; F:rRNA binding; F:metal ion binding; F:4 iron, 4 sulfur cluster binding; F:rRNA (adenine-C2-)-methyltransferase activity; C:cytosol	EC:2.1.1.192	23S rRNA (adenine(2503)-C(2))-methyltransferase	IPR007197 (PFAM); G3DSA:1.10.150.530 (GENE3D); IPR013785 (G3DSA:3.20.20.GENE3D); IPR004383 (PIRSF); IPR027492 (TIGRFAM); IPR007197 (SFLD); IPR004383 (SFLD); IPR040072 (PANTHER); PTHR30544:SF5 (PANTHER); IPR027492 (HAMAP); IPR007197 (PROSITE_PROFILES); cd01335 (CDD); SSF102114 (SUPERFAMILY)	P:GO:0006364; P:GO:0030488; P:GO:0070475; F:GO:0003824; F:GO:0008173; F:GO:0051536	P:rRNA processing; P:tRNA methylation; P:rRNA base methylation; F:catalytic activity; F:RNA methyltransferase activity; F:iron-sulfur cluster binding
WP_003113440.1	MULTISPECIES: 2-dehydro-3-deoxy-phosphogluconate aldolase [Pseudomonas]	56	11	29	11	23.9	654	11	0	11	Yes	-1.00826	0.629448		1.46723	1.06269e-06		1.80825	2.46949e-07	Up	1.2038	0.000708951		PA3181		2-keto-3-deoxy-6-phosphogluconate aldolase	PA3181	1.22629	0.33726	G	F:GO:0008675; F:GO:0008700; F:GO:0008948; F:GO:0042802; F:GO:0061677; F:GO:0106009; C:GO:0005829	F:2-dehydro-3-deoxy-phosphogluconate aldolase activity; F:4-hydroxy-2-oxoglutarate aldolase activity; F:oxaloacetate decarboxylase activity; F:identical protein binding; F:2-dehydro-3-deoxy-D-gluconate aldolase activity; F:(4S)-4-hydroxy-2-oxoglutarate aldolase activity; C:cytosol	EC:4.1.2.14; EC:4.1.3.16; EC:4.1.1.112; EC:1.1.1.38; EC:4.1.3.42; EC:4.1.2.51; EC:1.1.1.40	2-dehydro-3-deoxy-phosphogluconate aldolase; 4-hydroxy-2-oxoglutarate aldolase; Oxaloacetate decarboxylase; Malate dehydrogenase (oxaloacetate-decarboxylating); (4S)-4-hydroxy-2-oxoglutarate aldolase; 2-dehydro-3-deoxy-D-gluconate aldolase; Malate dehydrogenase (oxaloacetate-decarboxylating) (NADP(+))	IPR000887 (TIGRFAM); IPR000887 (PFAM); IPR013785 (G3DSA:3.20.20.GENE3D); IPR000887 (PANTHER); IPR031338 (PROSITE_PATTERNS); IPR031337 (PROSITE_PATTERNS); IPR000887 (CDD); SSF51569 (SUPERFAMILY)	F:GO:0003824; F:GO:0016829	F:catalytic activity; F:lyase activity
WP_003113135.1	MULTISPECIES: hypothetical protein [Pseudomonas]	34	5	10	5	17.2	477	5	0	5	Yes	-1.06406	0.351393		1.36355	0.00200917		1.80748	0.000449073	Up	-1.20344	0.0170634		PA3352		hypothetical protein	PA3352	-1.30409	0.00146634	NOU	P:GO:0044780; F:GO:0005515	P:bacterial-type flagellum assembly; F:protein binding			G3DSA:1.20.58.300 (GENE3D); IPR007809 (PFAM); mobidb-lite (MOBIDB_LITE); mobidb-lite (MOBIDB_LITE); IPR036679 (SUPERFAMILY)	P:GO:0044780; F:GO:0005515	P:bacterial-type flagellum assembly; F:protein binding
WP_003089718.1	MULTISPECIES: glycine cleavage system protein H [Pseudomonas]	29	4	17	4	13.8	456	4	0	4	Yes	-1.02401	0.644839		1.43986	0.00031193		1.80673	0.000375625	Up	-1.20651	0.00165615		PA2446	gcvH2	glycine cleavage system protein H2	gcvH2	1.08334	0.636129	E	P:GO:0019464; C:GO:0005960	P:glycine decarboxylation via glycine cleavage system; C:glycine cleavage complex			G3DSA:2.40.50.100 (GENE3D); IPR033753 (PFAM); IPR017453 (TIGRFAM); PTHR11715:SF3 (PANTHER); IPR002930 (PANTHER); IPR000089 (PROSITE_PROFILES); IPR002930 (HAMAP); IPR033753 (CDD); IPR011053 (SUPERFAMILY)	P:GO:0019464; C:GO:0005960	P:glycine decarboxylation via glycine cleavage system; C:glycine cleavage complex
WP_003095846.1	MULTISPECIES: 50S ribosomal protein L31 [Pseudomonas]	21	2	12	2	7.9	221	2	0	2	Yes	-1.02313	0.725566		1.09241	0.154129		1.80511	0.000101631	Up	1.36269	0.00515311		PA5049	rpmE	50S ribosomal protein L31	rpmE	1.45373	0.0651572	J	P:GO:0006412; F:GO:0003735; F:GO:0008270; F:GO:0019843	P:translation; F:structural constituent of ribosome; F:zinc ion binding; F:rRNA binding			IPR002150 (PRINTS); IPR002150 (TIGRFAM); IPR002150 (PFAM); IPR042105 (G3DSA:4.10.830.GENE3D); PTHR33280:SF6 (PANTHER); IPR002150 (PANTHER); IPR002150 (PROSITE_PATTERNS); IPR027491 (HAMAP); IPR034704 (SUPERFAMILY)	P:GO:0006412; F:GO:0003735; C:GO:0005840	P:translation; F:structural constituent of ribosome; C:ribosome
WP_003095184.1	MULTISPECIES: 30S ribosomal protein S15 [Pseudomonas]	49	4	44	4	10.1	1351	4	0	4	Yes	-1.05999	0.118958		1.2747	0.00107999		1.80269	3.51527e-06	Up	-1.10645	0.022626		PA4741	rpsO	30S ribosomal protein S15	rpsO	2.36148	0.0111331	J	P:GO:0000028; P:GO:0006378; P:GO:0006412; F:GO:0003735; F:GO:0019843; C:GO:0005886	P:ribosomal small subunit assembly; P:mRNA polyadenylation; P:translation; F:structural constituent of ribosome; F:rRNA binding; C:plasma membrane			IPR000589 (PFAM); IPR005290 (TIGRFAM); G3DSA:6.10.250.3130 (GENE3D); G3DSA:1.10.287.10 (GENE3D); PTHR23321:SF26 (PANTHER); IPR005290 (PANTHER); IPR000589 (PROSITE_PATTERNS); IPR005290 (HAMAP); IPR000589 (CDD); IPR009068 (SUPERFAMILY)	P:GO:0006412; F:GO:0003735; C:GO:0005840	P:translation; F:structural constituent of ribosome; C:ribosome
WP_003085816.1	MULTISPECIES: peptidylprolyl isomerase [Pseudomonas]	29	3	16	3	17	547	3	0	3	Yes	1.03756	0.572709		1.61202	4.15672e-05	Up	1.7998	0.00230886	Up	1.23468	0.00331951		PA0837	slyD	peptidyl-prolyl cis-trans isomerase SlyD	slyD	-1.00342	0.960543	G	P:GO:0000413; P:GO:0042026; F:GO:0003755	P:protein peptidyl-prolyl isomerization; P:protein refolding; F:peptidyl-prolyl cis-trans isomerase activity	EC:5.2.1.8	Peptidylprolyl isomerase	G3DSA:3.10.50.40 (GENE3D); IPR001179 (PFAM); PTHR47861:SF3 (PANTHER); PTHR47861 (PANTHER); IPR001179 (PROSITE_PROFILES); SSF54534 (SUPERFAMILY)	F:GO:0003755	F:peptidyl-prolyl cis-trans isomerase activity
WP_023464900.1	amino acid ABC transporter substrate-binding protein [Pseudomonas aeruginosa]	11	3	7	3	30.4	164	3	0	3	Yes	-1.0446	0.895471		1.2464	0.323666		1.7935	0.0462731	Up	-4.258	0.00156844	Lower	PA2902		hypothetical protein	PA2902	-1.28267	0.000875585	ET					G3DSA:3.40.190.10 (GENE3D); IPR001638 (PFAM); G3DSA:3.40.190.10 (GENE3D); PTHR35936 (PANTHER); PTHR35936:SF5 (PANTHER); PS51257 (PROSITE_PROFILES); SSF53850 (SUPERFAMILY)	no GO terms	no GO terms
WP_003085057.1	MULTISPECIES: 30S ribosomal protein S21 [Pseudomonadaceae]	39	3	11	3	8.5	124	3	0	3	Yes	1.03187	0.558752		1.34833	0.00101953		1.79132	0.000194621	Up	0.939536	0.192967		PA0579	rpsU	30S ribosomal protein S21	rpsU	-1.16901	0.0386227	J	P:GO:0000028; P:GO:0006412; F:GO:0003735	P:ribosomal small subunit assembly; P:translation; F:structural constituent of ribosome			Coil (COILS); IPR001911 (PRINTS); IPR038380 (G3DSA:1.20.5.GENE3D); IPR001911 (PFAM); IPR001911 (TIGRFAM); mobidb-lite (MOBIDB_LITE); mobidb-lite (MOBIDB_LITE); IPR001911 (PANTHER); PTHR21109:SF15 (PANTHER); IPR018278 (PROSITE_PATTERNS); IPR001911 (HAMAP)	P:GO:0006412; F:GO:0003735; C:GO:0005840	P:translation; F:structural constituent of ribosome; C:ribosome
WP_003087236.1	MULTISPECIES: YbaB/EbfC family nucleoid-associated protein [Pseudomonas]	60	5	36	5	11.9	1294	5	0	5	Yes	-1.03212	0.517012		1.51874	6.56929e-05	Up	1.78819	0.00211312	Up	-1.38897	0.00304989		PA1533		conserved hypothetical protein	PA1533	1.27334	0.0489037	S	F:GO:0003677; C:GO:0005829; C:GO:0043590	F:DNA binding; C:cytosol; C:bacterial nucleoid			Coil (COILS); IPR004401 (PIRSF); IPR036894 (G3DSA:3.30.1310.GENE3D); IPR004401 (TIGRFAM); IPR004401 (PFAM); mobidb-lite (MOBIDB_LITE); mobidb-lite (MOBIDB_LITE); mobidb-lite (MOBIDB_LITE); PTHR33449:SF1 (PANTHER); IPR004401 (PANTHER); IPR004401 (HAMAP); IPR036894 (SUPERFAMILY)	F:GO:0003677	F:DNA binding
WP_003084736.1	MULTISPECIES: cell envelope integrity protein CreD [Pseudomonas]	26	12	29	12	50.5	679	12	0	12	Yes	3.38035	2.08921e-05	Up	8.61461	1.16581e-07	Up	1.78757	9.61352e-05	Up	0.878319	0.262199		PA0465	creD	inner membrane protein CreD	creD	2.63981	0.00037679	V	C:GO:0005886; C:GO:0016021	C:plasma membrane; C:integral component of membrane			IPR010364 (PIRSF); IPR010364 (PFAM); IPR010364 (PANTHER)	no GO terms	no GO terms
WP_003089790.1	MULTISPECIES: thiol:disulfide interchange protein DsbG [Pseudomonas]	43	9	17	9	28	429	9	0	9	Yes	-1.05709	0.210297		1.57447	8.67192e-05	Up	1.78723	7.93791e-05	Up	-3.65671	1.57015e-05	Lower	PA2476	dsbG	thiol:disulfide interchange protein DsbG	dsbG	-1.06432	0.510452	O	P:GO:0008152; F:GO:0003756; F:GO:0015035; C:GO:0042597	P:metabolic process; F:protein disulfide isomerase activity; F:protein-disulfide reductase activity; C:periplasmic space	EC:5.3.4.1; EC:1.8	Protein disulfide-isomerase; Acting on a sulfur group of donors	IPR009094 (G3DSA:3.10.450.GENE3D); G3DSA:3.40.30.10 (GENE3D); IPR012336 (PFAM); PTHR35272 (PANTHER); PTHR35272:SF4 (PANTHER); IPR033954 (CDD); IPR036249 (SUPERFAMILY); IPR009094 (SUPERFAMILY)	C:GO:0042597	C:periplasmic space
WP_003118588.1	MULTISPECIES: GGDEF domain-containing protein [Pseudomonas]	15	4	8	4	26.8	302	4	0	4	Yes	-1.13371	0.00743935		1.28113	0.00124189		1.78497	5.64293e-06	Up	3.20387	0.00258875	Higher	PA0169	siaD	SiaD	PA0169	1.2492	0.247966	T	P:GO:0043709; P:GO:1902201; F:GO:0052621; C:GO:0005886	P:cell adhesion involved in single-species biofilm formation; P:negative regulation of bacterial-type flagellum-dependent cell motility; F:diguanylate cyclase activity; C:plasma membrane	EC:2.7.7.65	Diguanylate cyclase	IPR000160 (PFAM); IPR043128 (G3DSA:3.30.70.GENE3D); IPR000160 (TIGRFAM); PTHR45138 (PANTHER); PTHR45138:SF9 (PANTHER); IPR000160 (PROSITE_PROFILES); IPR000160 (CDD); IPR029787 (SUPERFAMILY)	no GO terms	no GO terms
WP_003084517.1	MULTISPECIES: thiazole synthase [Pseudomonas]	56	13	49	13	28.2	1427	13	0	13	Yes	1.01813	0.570469		1.32383	9.00938e-05		1.78368	8.43488e-07	Up	-1.1169	0.00559021		PA0381	thiG	thiamine biosynthesis protein, thiazole moiety	thiG	-1.48553	2.47e-05	H	P:GO:0009228; P:GO:0009229; F:GO:0016783; C:GO:0005737	P:thiamine biosynthetic process; P:thiamine diphosphate biosynthetic process; F:sulfurtransferase activity; C:cytoplasm	EC:2.8.1	Transferring sulfur-containing groups	IPR013785 (G3DSA:3.20.20.GENE3D); IPR033983 (PFAM); IPR008867 (PANTHER); IPR008867 (HAMAP); IPR008867 (CDD); SSF110399 (SUPERFAMILY)	P:GO:0009228; F:GO:0003824	P:thiamine biosynthetic process; F:catalytic activity
WP_003085042.1	MULTISPECIES: GatB/YqeY domain-containing protein [Pseudomonas]	28	5	11	5	16.8	273	5	0	5	Yes	-1.01012	0.778067		1.54059	1.07657e-05	Up	1.78082	2.2284e-06	Up	0.849078	0.0876388		PA0578		conserved hypothetical protein	PA0578	-2.1462	6.31e-06	S	F:GO:0016740; F:GO:0016884	F:transferase activity; F:carbon-nitrogen ligase activity, with glutamine as amido-N-donor	EC:2; EC:6.3.5	Transferases; Forming carbon-nitrogen bonds	IPR042184 (G3DSA:1.10.1510.GENE3D); IPR019004 (PFAM); IPR023168 (G3DSA:1.10.10.GENE3D); IPR019004 (PANTHER); IPR003789 (SUPERFAMILY)	F:GO:0016884	F:carbon-nitrogen ligase activity, with glutamine as amido-N-donor
WP_003114234.1	MULTISPECIES: BolA family transcriptional regulator [Pseudomonas]	46	3	8	3	11.2	139	3	0	3	Yes	0.995397	0.949015		1.41537	0.00381168		1.77975	0.00117157	Up	-1.63385	0.00068788	Lower	PA0857	bolA	morphogene protein BolA	bolA	-1.03754	0.740268	T	P:GO:0006351; C:GO:0005829	P:transcription, DNA-templated; C:cytosol			IPR002634 (PIRSF); IPR002634 (PFAM); G3DSA:3.10.20.90 (GENE3D); PTHR46229:SF2 (PANTHER); PTHR46229 (PANTHER); IPR036065 (SUPERFAMILY)	no GO terms	no GO terms
WP_003117690.1	MULTISPECIES: peptidyl-prolyl cis-trans isomerase [Pseudomonas]	58	32	122	32	68.7	4022	32	0	32	Yes	1.00269	0.832971		1.53595	1.58097e-07	Up	1.76848	2.40978e-08	Up	-1.1744	1.55724e-05		PA1805	ppiD	peptidyl-prolyl cis-trans isomerase D	ppiD	1.30065	0.0129984	O	P:GO:0000413; P:GO:0061077; F:GO:0003755; F:GO:0042802; C:GO:0071575	P:protein peptidyl-prolyl isomerization; P:chaperone-mediated protein folding; F:peptidyl-prolyl cis-trans isomerase activity; F:identical protein binding; C:integral component of external side of plasma membrane	EC:5.2.1.8	Peptidylprolyl isomerase	G3DSA:3.10.50.40 (GENE3D); PF13616 (PFAM); G3DSA:1.10.4030.10 (GENE3D); PF13624 (PFAM); PTHR47529 (PANTHER); IPR023058 (PROSITE_PATTERNS); IPR000297 (PROSITE_PROFILES); IPR027304 (SUPERFAMILY); SSF54534 (SUPERFAMILY)	F:GO:0003755	F:peptidyl-prolyl cis-trans isomerase activity
WP_003093749.1	MULTISPECIES: 50S ribosomal protein L1 [Pseudomonas]	59	12	92	12	24.2	2866	12	0	12	Yes	1.00712	0.850779		1.08111	0.139507		1.76656	7.12871e-07	Up	1.09122	0.177089		PA4273	rplA	50S ribosomal protein L1	rplA	1.89253	0.0510479	J	P:GO:0000470; P:GO:0006417; F:GO:0000049; F:GO:0003735; F:GO:0019843; C:GO:0005618; C:GO:0005886	P:maturation of LSU-rRNA; P:regulation of translation; F:tRNA binding; F:structural constituent of ribosome; F:rRNA binding; C:cell wall; C:plasma membrane			IPR016095 (G3DSA:3.40.50.GENE3D); IPR002143 (PIRSF); IPR005878 (TIGRFAM); IPR028364 (PFAM); G3DSA:3.30.190.20 (GENE3D); PTHR36427 (PANTHER); IPR023673 (PROSITE_PATTERNS); IPR005878 (HAMAP); IPR028364 (CDD); IPR023674 (SUPERFAMILY)	P:GO:0006412; F:GO:0003723; F:GO:0003735; C:GO:0015934	P:translation; F:RNA binding; F:structural constituent of ribosome; C:large ribosomal subunit
WP_023464833.1	chromosome segregation protein SMC [Pseudomonas aeruginosa]	21	9	13	9	65.7	503	9	0	9	Yes	1.10283	0.172528		1.71521	0.00155813	Up	1.76509	0.00115644	Up										V	F:GO:0005524; F:GO:0016887	F:ATP binding; F:ATP hydrolysis activity	EC:3.6.1	Acting on acid anhydrides	IPR003959 (PFAM); IPR041685 (PFAM); IPR027417 (G3DSA:3.40.50.GENE3D); PTHR43581 (PANTHER); IPR027417 (SUPERFAMILY)	F:GO:0005524; F:GO:0016887	F:ATP binding; F:ATP hydrolysis activity
WP_003083624.1	MULTISPECIES: hypothetical protein [Pseudomonas]	25	2	4	2	10	92	2	0	2	Yes	-1.01835	0.787936		1.7059	0.00248662	Up	1.76344	0.0014997	Up	0.923758	0.393141		PA0068		hypothetical protein	PA0068	1.33169	0.143817	S	F:GO:0003677	F:DNA binding			IPR012658 (PFAM); IPR012658 (TIGRFAM); mobidb-lite (MOBIDB_LITE); mobidb-lite (MOBIDB_LITE)	no GO terms	no GO terms
WP_003103908.1	MULTISPECIES: 50S ribosomal protein L22 [Pseudomonadaceae]	41	4	20	4	11.9	925	4	0	4	Yes	1.04605	0.637037		1.08722	0.657981		1.76083	0.00839688	Up	1.00272	0.957113		PA4258	rplV	50S ribosomal protein L22	rplV	2.66564	0.0030117	J	P:GO:0006412; P:GO:0022618; P:GO:0042255; F:GO:0003735; F:GO:0019843; C:GO:0005618; C:GO:0042788	P:translation; P:ribonucleoprotein complex assembly; P:ribosome assembly; F:structural constituent of ribosome; F:rRNA binding; C:cell wall; C:polysomal ribosome			Coil (COILS); IPR005727 (TIGRFAM); IPR001063 (PFAM); IPR036394 (G3DSA:3.90.470.GENE3D); IPR005727 (PANTHER); IPR018260 (PROSITE_PATTERNS); IPR005727 (HAMAP); IPR001063 (CDD); IPR036394 (SUPERFAMILY)	P:GO:0006412; F:GO:0003735; C:GO:0005840; C:GO:0015934	P:translation; F:structural constituent of ribosome; C:ribosome; C:large ribosomal subunit
WP_023114184.1	MULTISPECIES: hypothetical protein [Pseudomonas]	25	4	9	4	22	372	4	0	4	Yes	-1.15213	0.01675		-1.18361	0.00836728		1.75483	0.000436225	Up											C:GO:0016021	C:integral component of membrane			mobidb-lite (MOBIDB_LITE); mobidb-lite (MOBIDB_LITE)	no GO terms	no GO terms
WP_003092643.1	MULTISPECIES: 30S ribosomal protein S16 [Pseudomonas]	57	4	22	4	9.2	842	4	0	4	Yes	-1.01974	0.574869		1.20417	0.00350486		1.75154	0.000222175	Up	-1.19771	0.000789993		PA3745	rpsP	30S ribosomal protein S16	rpsP	-1.29117	0.026573	J	P:GO:0000028; P:GO:0006259; P:GO:0006412; P:GO:0090305; F:GO:0000400; F:GO:0003735; F:GO:0004520; C:GO:0005886	P:ribosomal small subunit assembly; P:DNA metabolic process; P:translation; P:nucleic acid phosphodiester bond hydrolysis; F:four-way junction DNA binding; F:structural constituent of ribosome; F:endodeoxyribonuclease activity; C:plasma membrane	EC:3.1	Acting on ester bonds	IPR023803 (G3DSA:3.30.1320.GENE3D); IPR000307 (TIGRFAM); IPR000307 (PFAM); IPR000307 (PANTHER); IPR000307 (HAMAP); IPR023803 (SUPERFAMILY)	P:GO:0006412; F:GO:0003735; C:GO:0005840	P:translation; F:structural constituent of ribosome; C:ribosome
WP_003092070.1	MULTISPECIES: ribonuclease T [Pseudomonas]	13	2	6	2	24.7	132	2	0	2	Yes	1.14181	0.155098		1.49438	0.00156889		1.75087	0.000409069	Up	-2.74971	1.13878e-05	Lower	PA3528	rnt	ribonuclease T	rnt	-1.03862	0.625926	L	P:GO:0042780; P:GO:0045004; P:GO:0090503; F:GO:0000287; F:GO:0003676; F:GO:0008408; F:GO:0016896; C:GO:0005829; C:GO:0044776	P:tRNA 3'-end processing; P:DNA replication proofreading; P:RNA phosphodiester bond hydrolysis, exonucleolytic; F:magnesium ion binding; F:nucleic acid binding; F:3'-5' exonuclease activity; F:exoribonuclease activity, producing 5'-phosphomonoesters; C:cytosol; C:DNA polymerase III, core complex	EC:3.1.13; EC:3.1.15	Acting on ester bonds; Acting on ester bonds	IPR036397 (G3DSA:3.30.420.GENE3D); IPR013520 (PFAM); IPR005987 (TIGRFAM); PTHR30231 (PANTHER); IPR005987 (PTHR30231:PANTHER); IPR005987 (HAMAP); IPR005987 (CDD); IPR012337 (SUPERFAMILY)	P:GO:0006396; F:GO:0003676; F:GO:0004540	P:RNA processing; F:nucleic acid binding; F:ribonuclease activity
WP_003085635.1	MULTISPECIES: GntR family transcriptional regulator [Pseudomonas]	19	4	5	4	27.2	96	4	0	4	Yes	1.00937	0.888035		1.43113	0.0679312		1.74751	0.0153889	Up	1.6703	0.0222461	Higher	PA0797		probable transcriptional regulator	PA0797	1.61677	0.0728306	K	P:GO:0006355; F:GO:0003677; F:GO:0003700	P:regulation of transcription, DNA-templated; F:DNA binding; F:DNA-binding transcription factor activity			Coil (COILS); IPR011711 (PFAM); IPR008920 (G3DSA:1.20.120.GENE3D); IPR000524 (PFAM); IPR036388 (G3DSA:1.10.10.GENE3D); mobidb-lite (MOBIDB_LITE); PTHR43537:SF24 (PANTHER); PTHR43537 (PANTHER); IPR000524 (PROSITE_PROFILES); IPR000524 (CDD); IPR036390 (SUPERFAMILY); IPR008920 (SUPERFAMILY)	P:GO:0006355; F:GO:0003700	P:regulation of transcription, DNA-templated; F:DNA-binding transcription factor activity
WP_003084676.1	MULTISPECIES: Zn-dependent hydrolase [Pseudomonas]	37	14	49	14	45.2	1729	14	0	14	Yes	-1.04548	0.115756		1.91204	3.73334e-06	Up	1.74278	1.81275e-05	Up	4.55058	0.000267392	Higher	PA0444		N-carbamoyl-beta-alanine amidohydrolase	PA0444	-1.15814	0.467274	E	F:GO:0016813; F:GO:0046872; F:GO:0050538	F:hydrolase activity, acting on carbon-nitrogen (but not peptide) bonds, in linear amidines; F:metal ion binding; F:N-carbamoyl-L-amino-acid hydrolase activity	EC:3.5.3; EC:3.5.1.87	Acting on carbon-nitrogen bonds, other than peptide bonds; N-carbamoyl-L-amino-acid hydrolase	IPR011650 (PFAM); G3DSA:3.30.70.360 (GENE3D); IPR010158 (TIGRFAM); IPR010158 (PIRSF); G3DSA:3.40.630.10 (GENE3D); IPR002933 (PFAM); PTHR32494:SF15 (PANTHER); IPR010158 (PANTHER); cd03884 (CDD); IPR036264 (SUPERFAMILY); SSF53187 (SUPERFAMILY)	F:GO:0016787; F:GO:0016813	F:hydrolase activity; F:hydrolase activity, acting on carbon-nitrogen (but not peptide) bonds, in linear amidines
WP_003112622.1	MULTISPECIES: hypothetical protein [Pseudomonas]	46	4	7	4	8.1	175	4	0	4	Yes	-1.02642	0.595068		1.53443	0.000226114	Up	1.74194	0.000221052	Up															no IPS match	no IPS match	no IPS match
WP_023117318.1	MULTISPECIES: outer membrane protein [Pseudomonas]	15	7	8	7	53.8	259	7	0	7	Yes	1.00202	0.974017		1.00405	0.985915		1.74123	0.0807418		0.785166	0.165464		PA2525	opmB	OpmB	PA2525	1.69951	0.00472197	MU	P:GO:0055085; F:GO:0015562; C:GO:0009279; C:GO:0016021	P:transmembrane transport; F:efflux transmembrane transporter activity; C:cell outer membrane; C:integral component of membrane	EC:7	Translocases	Coil (COILS); G3DSA:1.20.1600.10 (GENE3D); G3DSA:2.20.200.10 (GENE3D); IPR003423 (PFAM); IPR010131 (TIGRFAM); PTHR30203 (PANTHER); PS51257 (PROSITE_PROFILES); SSF56954 (SUPERFAMILY)	P:GO:0055085; F:GO:0015562; F:GO:0022857; C:GO:0016020	P:transmembrane transport; F:efflux transmembrane transporter activity; F:transmembrane transporter activity; C:membrane
WP_003096690.1	MULTISPECIES: choline ABC transporter ATP-binding protein [Pseudomonas]	26	8	17	8	43.7	485	8	0	8	Yes	-1.05665	0.160122		1.2034	0.000201718		1.73844	8.01675e-06	Up	1.22865	0.000328519		PA5376	cbcV	CbcV	PA5376	1.40076	0.0369995	E	P:GO:0006972; P:GO:0015837; P:GO:0015871; P:GO:0031457; P:GO:0031460; P:GO:0042426; P:GO:0072488; P:GO:1902358; P:GO:1902603; F:GO:0005275; F:GO:0005524; F:GO:0015226; F:GO:0015419; F:GO:0016887; F:GO:0031459; F:GO:0033266	P:hyperosmotic response; P:amine transport; P:choline transport; P:glycine betaine catabolic process; P:glycine betaine transport; P:choline catabolic process; P:ammonium transmembrane transport; P:sulfate transmembrane transport; P:carnitine transmembrane transport; F:amine transmembrane transporter activity; F:ATP binding; F:carnitine transmembrane transporter activity; F:ABC-type sulfate trans…	EC:3.6.1; EC:7.3.2.3; EC:7.6.2.9	Acting on acid anhydrides; ABC-type sulfate transporter; ABC-type quaternary amine transporter	IPR022473 (TIGRFAM); IPR027417 (G3DSA:3.40.50.GENE3D); IPR003439 (PFAM); PTHR43869 (PANTHER); IPR017871 (PROSITE_PATTERNS); IPR003439 (PROSITE_PROFILES); IPR027417 (SUPERFAMILY)	P:GO:0015871; F:GO:0005524; F:GO:0015220; C:GO:0055052	P:choline transport; F:ATP binding; F:choline transmembrane transporter activity; C:ATP-binding cassette (ABC) transporter complex, substrate-binding subunit-containing
WP_003098078.1	MULTISPECIES: bifunctional phosphoserine phosphatase/homoserine phosphotransferase ThrH [Pseudomonas]	38	7	13	7	23.5	262	7	0	7	Yes	-1.01354	0.832478		1.39663	0.00109094		1.73537	0.000308943	Up	0.89369	0.0731728		PA1757	thrH	homoserine kinase	thrH	-1.54573	0.000763417	E	P:GO:0006564; P:GO:0009088; P:GO:0016310; P:GO:0016311; P:GO:0046654; F:GO:0000287; F:GO:0004413; F:GO:0036424; F:GO:0043899; F:GO:0046820; C:GO:0005737	P:L-serine biosynthetic process; P:threonine biosynthetic process; P:phosphorylation; P:dephosphorylation; P:tetrahydrofolate biosynthetic process; F:magnesium ion binding; F:homoserine kinase activity; F:L-phosphoserine phosphatase activity; F:phosphoserine:homoserine phosphotransferase activity; F:4-amino-4-deoxychorismate synthase activity; C:cytoplasm	EC:2.7.1.39; EC:2.6.1.85; EC:3.1.3.3	Homoserine kinase; Aminodeoxychorismate synthase; Phosphoserine phosphatase	PF12710 (PFAM); IPR023214 (G3DSA:3.40.50.GENE3D); IPR011863 (TIGRFAM); G3DSA:3.90.1470.10 (GENE3D); PTHR43344 (PANTHER); PTHR43344:SF2 (PANTHER); cd02607 (CDD); IPR036412 (SUPERFAMILY)	no GO terms	no GO terms
WP_023464239.1	flavin monoamine oxidase family protein [Pseudomonas aeruginosa]	50	21	60	21	54.1	1888	21	0	21	Yes	1.12325	0.000216458		1.46654	1.90502e-06		1.73483	4.28086e-08	Up	2.0729	0.000632627	Higher	PA0421		hypothetical protein	PA0421	1.06353	0.411688	E	F:GO:0016491	F:oxidoreductase activity	EC:1	Oxidoreductases	IPR001613 (PRINTS); IPR036188 (G3DSA:3.50.50.GENE3D); IPR002937 (PFAM); PTHR43563 (PANTHER); SSF54373 (SUPERFAMILY); IPR036188 (SUPERFAMILY)	F:GO:0016491	F:oxidoreductase activity
WP_003098446.1	MULTISPECIES: YbjN domain-containing protein [Pseudomonas]	33	3	4	3	17.5	206	3	0	3	Yes	1.09944	0.474071		1.11619	0.393902		1.73482	0.0120817	Up	0.705217	0.0658361		PA0698		hypothetical protein	PA0698	1.59194	0.0458656	S					IPR019660 (PFAM); cd17511 (CDD)	no GO terms	no GO terms
WP_003091011.1	MULTISPECIES: precorrin-2 C(20)-methyltransferase [Pseudomonas]	19	4	7	4	27.3	198	4	0	4	Yes	1.05321	0.722487		1.23804	0.0998762		1.73394	0.00735274	Up	1.0737	0.608111		PA2904	cobI	precorrin-2 methyltransferase CobI	cobI	1.1175	0.393589	H	P:GO:0009236; P:GO:0032259; F:GO:0030788; C:GO:0005886	P:cobalamin biosynthetic process; P:methylation; F:precorrin-2 C20-methyltransferase activity; C:plasma membrane	EC:2.1.1.130	Precorrin-2 C(20)-methyltransferase	IPR012382 (PIRSF); IPR000878 (PFAM); IPR014776 (G3DSA:3.30.950.GENE3D); IPR014777 (G3DSA:3.40.1010.GENE3D); IPR006364 (TIGRFAM); PTHR43467 (PANTHER); PTHR43467:SF2 (PANTHER); IPR012382 (CDD); IPR035996 (SUPERFAMILY)	P:GO:0009236; F:GO:0008168; F:GO:0008757; F:GO:0030788	P:cobalamin biosynthetic process; F:methyltransferase activity; F:S-adenosylmethionine-dependent methyltransferase activity; F:precorrin-2 C20-methyltransferase activity
WP_003086914.1	MULTISPECIES: YbaK/EbsC family protein [Pseudomonas]	20	2	6	2	16.8	282	2	0	2	Yes	1.02568	0.689711		1.05227	0.531242		1.73142	0.000591177	Up	1.2032	0.0445531		PA1357		conserved hypothetical protein	PA1357	-1.09672	0.242093	S	P:GO:0006412; P:GO:0106074; F:GO:0002161; F:GO:0004812	P:translation; P:aminoacyl-tRNA metabolism involved in translational fidelity; F:aminoacyl-tRNA editing activity; F:aminoacyl-tRNA ligase activity	EC:6.1.1; EC:3.1.1.1	Forming carbon-oxygen bonds; Carboxylesterase	IPR007214 (PFAM); IPR036754 (G3DSA:3.90.960.GENE3D); PTHR30411 (PANTHER); PTHR30411:SF1 (PANTHER); cd04333 (CDD); IPR036754 (SUPERFAMILY)	F:GO:0002161	F:aminoacyl-tRNA editing activity
WP_003100114.1	MULTISPECIES: phosphonoacetaldehyde hydrolase [Pseudomonas]	19	5	11	5	29.9	383	5	0	5	Yes	1.05406	0.56415		1.60673	0.000750794	Up	1.72629	0.000159748	Up	-1.15663	0.0504864		PA1311	phnX	2-phosphonoacetaldehyde hydrolase	phnX	-1.14113	0.301425	S	P:GO:0019700; F:GO:0000287; F:GO:0050194	P:organic phosphonate catabolic process; F:magnesium ion binding; F:phosphonoacetaldehyde hydrolase activity	EC:3.11.1.1	Phosphonoacetaldehyde hydrolase	IPR006323 (TIGRFAM); IPR023214 (G3DSA:3.40.50.GENE3D); PF00702 (PFAM); IPR023198 (G3DSA:1.10.150.GENE3D); IPR006439 (TIGRFAM); SFLDF00038 (SFLD); SFLDG01129 (SFLD); PTHR43192 (PANTHER); IPR006323 (HAMAP); IPR006323 (CDD); IPR036412 (SUPERFAMILY)	P:GO:0019700; F:GO:0050194	P:organic phosphonate catabolic process; F:phosphonoacetaldehyde hydrolase activity
WP_003104873.1	MULTISPECIES: XdhC family protein [Pseudomonas]	28	8	16	8	34.7	691	8	0	8	Yes	-1.04453	0.0153156		1.12905	0.000176568		1.72526	4.45553e-05	Up	-1.18131	0.00209635		PA4618		hypothetical protein	PA4618	1.01935	0.890291	O					G3DSA:3.40.50.720 (GENE3D); IPR027051 (PFAM); IPR003777 (PFAM); PTHR30388:SF4 (PANTHER); PTHR30388 (PANTHER)	no GO terms	no GO terms
WP_003087446.1	MULTISPECIES: molecular chaperone HtpG [Pseudomonas]	61	34	180	34	71.6	5670	34	0	34	Yes	1.07352	0.0446268		1.4818	0.0030209		1.71863	4.40762e-05	Up	-1.38777	1.97033e-06		PA1596	htpG	heat shock protein HtpG	htpG	1.31522	0.117312	O	P:GO:0006457; P:GO:0006974; P:GO:0009408; P:GO:0071451; F:GO:0005524; F:GO:0016887; F:GO:0042802; F:GO:0051082; C:GO:0005576; C:GO:0005618; C:GO:0005829; C:GO:0005886	P:protein folding; P:cellular response to DNA damage stimulus; P:response to heat; P:cellular response to superoxide; F:ATP binding; F:ATP hydrolysis activity; F:identical protein binding; F:unfolded protein binding; C:extracellular region; C:cell wall; C:cytosol; C:plasma membrane	EC:3.6.1	Acting on acid anhydrides	IPR020575 (PRINTS); G3DSA:3.40.50.11260 (GENE3D); IPR001404 (PIRSF); IPR037196 (G3DSA:1.20.120.GENE3D); G3DSA:3.30.230.80 (GENE3D); IPR036890 (G3DSA:3.30.565.GENE3D); IPR003594 (PFAM); IPR001404 (PFAM); PTHR11528:SF97 (PANTHER); IPR001404 (PANTHER); IPR019805 (PROSITE_PATTERNS); IPR001404 (HAMAP); cd16927 (CDD); IPR020568 (SUPERFAMILY); IPR036890 (SUPERFAMILY); IPR037196 (SUPERFAMILY)	P:GO:0006457; F:GO:0005524; F:GO:0016887; F:GO:0051082	P:protein folding; F:ATP binding; F:ATP hydrolysis activity; F:unfolded protein binding
WP_016263981.1	MULTISPECIES: carbonic anhydrase [Pseudomonas]	40	8	47	8	26.7	1202	8	0	8	Yes	1.09736	0.00268261		1.36106	1.3522e-05		1.71739	3.0198e-07	Up	1.48064	4.38815e-06		PA0102		probable carbonic anhydrase	PA0102	1.21001	0.202451	P	P:GO:0009440; P:GO:0015976; F:GO:0004089; F:GO:0008270	P:cyanate catabolic process; P:carbon utilization; F:carbonate dehydratase activity; F:zinc ion binding	EC:4.2.1.1	Carbonic anhydrase	IPR001765 (PFAM); IPR036874 (G3DSA:3.40.1050.GENE3D); PTHR11002:SF42 (PANTHER); IPR001765 (PANTHER); IPR015892 (PROSITE_PATTERNS); IPR015892 (PROSITE_PATTERNS); IPR045066 (CDD); IPR036874 (SUPERFAMILY)	P:GO:0015976; F:GO:0004089; F:GO:0008270	P:carbon utilization; F:carbonate dehydratase activity; F:zinc ion binding
WP_003093079.1	MULTISPECIES: HU family DNA-binding protein [Pseudomonas]	69	6	21	6	9.9	267	6	0	6	Yes	1.06522	0.165371		1.40791	0.00360558		1.71542	0.00010348	Up	-2.00277	0.00242534	Lower	PA3940		probable DNA binding protein	PA3940	2.00259	9.92e-05	L	F:GO:0003677; C:GO:0005829	F:DNA binding; C:cytosol			IPR000119 (PRINTS); IPR010992 (G3DSA:4.10.520.GENE3D); IPR000119 (PFAM); IPR000119 (PANTHER); PTHR33175:SF12 (PANTHER); cd00591 (CDD); IPR010992 (SUPERFAMILY)	F:GO:0003677	F:DNA binding
WP_003098240.1	MULTISPECIES: hypothetical protein [Pseudomonas]	74	4	13	4	11.2	365	4	0	4	Yes	1.02389	0.64187		1.80253	1.15634e-05	Up	1.70907	0.000879006	Up	1.37355	0.00721345		PA5285	sutA	SutA	PA5285	1.8097	5.9e-05						Coil (COILS); mobidb-lite (MOBIDB_LITE); mobidb-lite (MOBIDB_LITE); mobidb-lite (MOBIDB_LITE); mobidb-lite (MOBIDB_LITE)	no GO terms	no GO terms
WP_003145300.1	MULTISPECIES: ribonuclease D [Pseudomonas]	26	8	16	8	43.1	501	8	0	8	Yes	1.05843	0.0447702		1.25299	0.000173362		1.69024	4.15828e-06	Up	-1.14343	0.0178443		PA1294	rnd	ribonuclease D	rnd	-1.13301	0.356415	J	P:GO:0042780; P:GO:0090503; F:GO:0000166; F:GO:0000175; F:GO:0003676; F:GO:0033890; C:GO:0005737	P:tRNA 3'-end processing; P:RNA phosphodiester bond hydrolysis, exonucleolytic; F:nucleotide binding; F:3'-5'-exoribonuclease activity; F:nucleic acid binding; F:ribonuclease D activity; C:cytoplasm	EC:3.1.13.5; EC:3.1.15	Ribonuclease D; Acting on ester bonds	IPR044876 (G3DSA:1.10.150.GENE3D); IPR006292 (TIGRFAM); IPR002562 (PFAM); IPR002121 (PFAM); IPR044876 (G3DSA:1.10.150.GENE3D); IPR036397 (G3DSA:3.30.420.GENE3D); PTHR47649 (PANTHER); IPR002121 (PROSITE_PROFILES); IPR006292 (HAMAP); cd06142 (CDD); IPR010997 (SUPERFAMILY); IPR010997 (SUPERFAMILY); IPR012337 (SUPERFAMILY)	P:GO:0006139; P:GO:0008033; P:GO:0044237; F:GO:0000166; F:GO:0003676; F:GO:0008408; F:GO:0033890	P:nucleobase-containing compound metabolic process; P:tRNA processing; P:cellular metabolic process; F:nucleotide binding; F:nucleic acid binding; F:3'-5' exonuclease activity; F:ribonuclease D activity
WP_003093145.1	MULTISPECIES: hybrid sensor histidine kinase/response regulator [Pseudomonas]	8	6	8	6	88.1	154	6	0	6	Yes	-1.20535	0.107366		1.04378	0.522415		1.69015	0.0156224	Up	1.32849	0.0175043		PA3974	ladS	Lost Adherence Sensor, LadS	ladS	-1.19101	0.000729614	T	P:GO:0000160; P:GO:0018106; F:GO:0000155; C:GO:0016021	P:phosphorelay signal transduction system; P:peptidyl-histidine phosphorylation; F:phosphorelay sensor kinase activity; C:integral component of membrane	EC:2.7.3; EC:2.7.13.3	Transferring phosphorus-containing groups; Histidine kinase	Coil (COILS); IPR004358 (PRINTS); IPR036890 (G3DSA:3.30.565.GENE3D); G3DSA:1.10.287.130 (GENE3D); IPR011622 (PFAM); G3DSA:3.40.50.2300 (GENE3D); IPR001789 (PFAM); IPR011623 (PFAM); IPR003594 (PFAM); IPR003661 (PFAM); G3DSA:2.60.40.2380 (GENE3D); PTHR43047 (PANTHER); PTHR43047:SF49 (PANTHER); IPR001789 (PROSITE_PROFILES); IPR005467 (PROSITE_PROFILES); cd17546 (CDD); cd16922 (CDD); IPR003661 (CDD);…	P:GO:0000160; P:GO:0007165; P:GO:0016310; F:GO:0000155; F:GO:0016772	P:phosphorelay signal transduction system; P:signal transduction; P:phosphorylation; F:phosphorelay sensor kinase activity; F:transferase activity, transferring phosphorus-containing groups
WP_003091585.1	MULTISPECIES: UTRA domain-containing protein [Pseudomonas]	23	4	9	4	26.8	289	4	0	4	Yes	1.16132	0.0990839		1.33185	0.0158652		1.68895	0.00169638	Up	1.15432	0.143712		PA3249		probable transcriptional regulator	PA3249	-1.34396	0.0576567	K	P:GO:0045892; F:GO:0003677; F:GO:0003700	P:negative regulation of transcription, DNA-templated; F:DNA binding; F:DNA-binding transcription factor activity			IPR000524 (PRINTS); IPR036388 (G3DSA:1.10.10.GENE3D); IPR028978 (G3DSA:3.40.1410.GENE3D); IPR000524 (PFAM); IPR011663 (PFAM); PTHR44846:SF7 (PANTHER); PTHR44846 (PANTHER); IPR000524 (PROSITE_PROFILES); IPR000524 (CDD); IPR028978 (SUPERFAMILY); IPR036390 (SUPERFAMILY)	P:GO:0006355; F:GO:0003677; F:GO:0003700	P:regulation of transcription, DNA-templated; F:DNA binding; F:DNA-binding transcription factor activity
WP_003084725.1	MULTISPECIES: DUF2780 domain-containing protein [Pseudomonas]	23	3	15	3	18.7	963	3	0	3	Yes	1.02231	0.639036		1.6139	9.17853e-05	Up	1.68812	4.78803e-05	Up	-1.74346	0.000386584	Lower	PA0460		hypothetical protein	PA0460	1.23014	0.107599	S					IPR021302 (PFAM)	no GO terms	no GO terms
WP_003092341.1	MULTISPECIES: 5'-nucleotidase SurE [Pseudomonas]	18	4	15	4	26.4	322	4	0	4	Yes	1.01637	0.762172		1.38431	0.00514443		1.68736	0.000301759	Up	-1.23818	0.016089		PA3625	surE	survival protein SurE	surE	-1.65291	0.000130568	S	P:GO:0016311; P:GO:0034404; P:GO:0046050; P:GO:0046133; F:GO:0000166; F:GO:0004309; F:GO:0008253; F:GO:0008254; F:GO:0030145; F:GO:0042802; C:GO:0005737	P:dephosphorylation; P:nucleobase-containing small molecule biosynthetic process; P:UMP catabolic process; P:pyrimidine ribonucleoside catabolic process; F:nucleotide binding; F:exopolyphosphatase activity; F:5'-nucleotidase activity; F:3'-nucleotidase activity; F:manganese ion binding; F:identical protein binding; C:cytoplasm	EC:3.6.1.11; EC:3.1.3.6; EC:3.1.3.5	Exopolyphosphatase; 3'-nucleotidase; 5'-nucleotidase	IPR036523 (G3DSA:3.40.1210.GENE3D); IPR002828 (PFAM); IPR002828 (TIGRFAM); PTHR30457:SF12 (PANTHER); IPR030048 (PANTHER); IPR030048 (HAMAP); IPR036523 (SUPERFAMILY)	F:GO:0008252; F:GO:0016787	F:nucleotidase activity; F:hydrolase activity
WP_003093699.1	MULTISPECIES: 50S ribosomal protein L6 [Pseudomonas]	55	10	91	10	19.1	2140	10	0	10	Yes	1.00587	0.807246		1.13897	0.0123102		1.68653	4.07545e-05	Up	-1.08215	0.012806		PA4248	rplF	50S ribosomal protein L6	rplF	1.34106	0.196654	J	P:GO:0000027; P:GO:0002181; F:GO:0003735; F:GO:0070180; C:GO:0005618; C:GO:0005886	P:ribosomal large subunit assembly; P:cytoplasmic translation; F:structural constituent of ribosome; F:large ribosomal subunit rRNA binding; C:cell wall; C:plasma membrane			IPR019906 (PRINTS); IPR000702 (PIRSF); IPR020040 (PFAM); IPR036789 (G3DSA:3.90.930.GENE3D); IPR036789 (G3DSA:3.90.930.GENE3D); IPR019906 (TIGRFAM); IPR019906 (PTHR11655:PANTHER); IPR000702 (PANTHER); IPR002358 (PROSITE_PATTERNS); IPR019906 (HAMAP); IPR036789 (SUPERFAMILY); IPR036789 (SUPERFAMILY)	P:GO:0006412; F:GO:0003735; F:GO:0019843; C:GO:0005840	P:translation; F:structural constituent of ribosome; F:rRNA binding; C:ribosome
WP_023086850.1	energy transducer TonB [Pseudomonas aeruginosa]	21	5	9	5	37	247	5	0	5	Yes	1.02503	0.291907		1.89082	0.000835776	Up	1.68567	0.000238697	Up										U	P:GO:0007165; P:GO:0009410; P:GO:0015031; P:GO:0015889; P:GO:0033214; P:GO:0042908; P:GO:0044718; F:GO:0015343; F:GO:0019904; F:GO:0031992; C:GO:0030288; C:GO:0071575; C:GO:0098797	P:signal transduction; P:response to xenobiotic stimulus; P:protein transport; P:cobalamin transport; P:siderophore-dependent iron import into cell; P:xenobiotic transport; P:siderophore transmembrane transport; F:siderophore transmembrane transporter activity; F:protein domain specific binding; F:energy transducer activity; C:outer membrane-bounded periplasmic space; C:integral component of exte…	EC:7	Translocases	IPR003538 (PRINTS); IPR037682 (PFAM); G3DSA:3.30.2420.10 (GENE3D); IPR006260 (TIGRFAM); mobidb-lite (MOBIDB_LITE); mobidb-lite (MOBIDB_LITE); mobidb-lite (MOBIDB_LITE); mobidb-lite (MOBIDB_LITE); PTHR33446:SF8 (PANTHER); PTHR33446 (PANTHER); SSF74653 (SUPERFAMILY)	P:GO:0015891; P:GO:0055085; F:GO:0015343; F:GO:0031992; C:GO:0030288	P:siderophore transport; P:transmembrane transport; F:siderophore transmembrane transporter activity; F:energy transducer activity; C:outer membrane-bounded periplasmic space
WP_003092068.1	MULTISPECIES: dihydroorotase [Pseudomonas]	32	9	26	9	38.4	848	9	0	9	Yes	1.02676	0.524692		1.71499	1.66943e-05	Up	1.6851	2.03792e-05	Up	-3.48394	4.41827e-05	Lower	PA3527	pyrC	dihydroorotase	pyrC	-1.1914	0.0289434	F	P:GO:0019856; P:GO:0044205; F:GO:0004151; F:GO:0008270	P:pyrimidine nucleobase biosynthetic process; P:'de novo' UMP biosynthetic process; F:dihydroorotase activity; F:zinc ion binding	EC:3.5.2.3	Dihydroorotase	IPR004721 (PIRSF); G3DSA:3.20.20.140 (GENE3D); IPR004721 (TIGRFAM); IPR006680 (PFAM); IPR004721 (PANTHER); IPR002195 (PROSITE_PATTERNS); IPR002195 (PROSITE_PATTERNS); IPR004721 (HAMAP); IPR004721 (CDD); IPR032466 (SUPERFAMILY)	P:GO:0019856; F:GO:0004151; F:GO:0016787; F:GO:0016812	P:pyrimidine nucleobase biosynthetic process; F:dihydroorotase activity; F:hydrolase activity; F:hydrolase activity, acting on carbon-nitrogen (but not peptide) bonds, in cyclic amides
WP_015649395.1	MULTISPECIES: helix-turn-helix domain-containing protein [Pseudomonas]	20	2	8	2	11.9	233	2	0	2	Yes	-1.09257	0.0198915		1.48457	0.000236416		1.68436	1.01168e-05	Up										K	F:GO:0003677	F:DNA binding			IPR010982 (G3DSA:1.10.260.GENE3D); IPR001387 (PFAM); IPR001387 (PROSITE_PROFILES); IPR001387 (CDD); IPR010982 (SUPERFAMILY)	F:GO:0003677	F:DNA binding
WP_023116994.1	radical SAM protein [Pseudomonas aeruginosa]	11	3	5	3	33.5	93	3	0	3	Yes	1.05083	0.66318		1.16401	0.105809		1.6835	0.00179738	Up	-1.42291	0.0201693		PA2956		conserved hypothetical protein	PA2956	-1.62479	0.000512069	C	F:GO:0003824; F:GO:0051536	F:catalytic activity; F:iron-sulfur cluster binding			IPR007197 (PFAM); IPR013785 (G3DSA:3.20.20.GENE3D); SFLDG01082 (SFLD); SFLDG01095 (SFLD); IPR007197 (SFLD); PTHR43409 (PANTHER); PTHR43409:SF4 (PANTHER); IPR007197 (PROSITE_PROFILES); cd01335 (CDD); SSF102114 (SUPERFAMILY)	F:GO:0003824; F:GO:0051536	F:catalytic activity; F:iron-sulfur cluster binding
WP_003102213.1	MULTISPECIES: YigZ family protein [Pseudomonas]	19	3	4	3	20.9	161	3	0	3	Yes	1.0106	0.862816		1.30215	0.101158		1.68209	0.0149752	Up	2.53705	0.000772599	Higher	PA0168		conserved hypothetical protein	PA0168	1.11979	0.189492	S					IPR001498 (PFAM); IPR036956 (G3DSA:3.30.230.GENE3D); G3DSA:3.30.70.240 (GENE3D); IPR015269 (PFAM); IPR023582 (PANTHER); PTHR16301:SF20 (PANTHER); IPR020569 (PROSITE_PATTERNS); IPR035647 (SUPERFAMILY); IPR020568 (SUPERFAMILY)	no GO terms	no GO terms
WP_010793087.1	MULTISPECIES: RHS repeat protein [Pseudomonas]	4	4	8	4	145.8	219	4	0	4	Yes	-1.31295	0.534061		1.20115	0.34789		1.68148	0.0901787		1.5766	0.277735		PA2684	tse5	Tse5	PA2684	2.52368	3.69e-06	M					Coil (COILS); IPR001826 (PRINTS); G3DSA:2.180.10.10 (GENE3D); G3DSA:2.180.10.10 (GENE3D); IPR022385 (TIGRFAM); IPR001826 (PFAM); IPR006530 (TIGRFAM); IPR031325 (PFAM); IPR045351 (PFAM); mobidb-lite (MOBIDB_LITE); PTHR32305 (PANTHER); PTHR32305:SF15 (PANTHER); SSF69304 (SUPERFAMILY)	no GO terms	no GO terms
WP_003112041.1	AraC family transcriptional regulator [Pseudomonas aeruginosa]	8	2	2	2	28.6	60	2	0	2	Yes	1.00079	0.991546		-1.07719	0.290164		1.67927	5.78818e-05	Up	0.880764	0.353616		PA1235		probable transcriptional regulator	PA1235	1.00425	0.971005	K	P:GO:0006355; P:GO:0019299; F:GO:0003700; F:GO:0043565; C:GO:0005737	P:regulation of transcription, DNA-templated; P:rhamnose metabolic process; F:DNA-binding transcription factor activity; F:sequence-specific DNA binding; C:cytoplasm			IPR020449 (PRINTS); IPR018060 (PFAM); G3DSA:1.10.10.60 (GENE3D); IPR003313 (PFAM); IPR014710 (G3DSA:2.60.120.GENE3D); PTHR11019:SF159 (PANTHER); PTHR11019 (PANTHER); IPR018062 (PROSITE_PATTERNS); IPR018060 (PROSITE_PROFILES); cd06124 (CDD); IPR009057 (SUPERFAMILY); IPR011051 (SUPERFAMILY)	P:GO:0006355; F:GO:0003700; F:GO:0043565	P:regulation of transcription, DNA-templated; F:DNA-binding transcription factor activity; F:sequence-specific DNA binding
WP_003093742.1	MULTISPECIES: 30S ribosomal protein S7 [Pseudomonas]	57	9	72	9	17.5	1309	9	0	9	Yes	-1.03944	0.135088		1.10539	0.00329789		1.67721	1.18744e-05	Up	-1.09726	0.00675836		PA4267	rpsG	30S ribosomal protein S7	rpsG	1.81015	0.0205167	J	P:GO:0000028; P:GO:0017148; F:GO:0000049; F:GO:0003729; F:GO:0003735; F:GO:0019843; C:GO:0005618; C:GO:0005886	P:ribosomal small subunit assembly; P:negative regulation of translation; F:tRNA binding; F:mRNA binding; F:structural constituent of ribosome; F:rRNA binding; C:cell wall; C:plasma membrane			IPR000235 (PIRSF); IPR023798 (PFAM); IPR005717 (TIGRFAM); IPR036823 (G3DSA:1.10.455.GENE3D); IPR000235 (PANTHER); PTHR11205:SF19 (PANTHER); IPR020606 (PROSITE_PATTERNS); IPR005717 (HAMAP); cd14869 (CDD); IPR036823 (SUPERFAMILY)	P:GO:0006412; F:GO:0003723; F:GO:0003735; C:GO:0015935	P:translation; F:RNA binding; F:structural constituent of ribosome; C:small ribosomal subunit
WP_003115023.1	MULTISPECIES: aldolase [Pseudomonas]	27	5	13	5	22.8	590	5	0	5	Yes	1.09917	0.174263		1.5182	0.00167605	Up	1.67269	0.000957148	Up	1.18351	0.0484517		PA3131		probable aldolase	PA3131	-1.18695	0.197287	G	F:GO:0008675; F:GO:0008700; F:GO:0061677	F:2-dehydro-3-deoxy-phosphogluconate aldolase activity; F:4-hydroxy-2-oxoglutarate aldolase activity; F:2-dehydro-3-deoxy-D-gluconate aldolase activity	EC:4.1.2.14; EC:4.1.3.16; EC:4.1.2.51	2-dehydro-3-deoxy-phosphogluconate aldolase; 4-hydroxy-2-oxoglutarate aldolase; 2-dehydro-3-deoxy-D-gluconate aldolase	Coil (COILS); IPR000887 (TIGRFAM); IPR000887 (PFAM); IPR013785 (G3DSA:3.20.20.GENE3D); IPR000887 (PANTHER); IPR031337 (PROSITE_PATTERNS); IPR000887 (CDD); SSF51569 (SUPERFAMILY)	F:GO:0003824; F:GO:0016829	F:catalytic activity; F:lyase activity
WP_003098293.1	MULTISPECIES: deoxyuridine 5'-triphosphate nucleotidohydrolase [Pseudomonas]	26	3	11	3	15.9	402	3	0	3	Yes	-1.01922	0.735572		1.49227	0.000236682		1.67254	3.68941e-05	Up	1.07122	0.407719		PA5321	dut	deoxyuridine 5'-triphosphate nucleotidohydrolase	dut	-1.13572	0.0973356	F	P:GO:0006226; P:GO:0046081; F:GO:0000287; F:GO:0004170; C:GO:0005829	P:dUMP biosynthetic process; P:dUTP catabolic process; F:magnesium ion binding; F:dUTP diphosphatase activity; C:cytosol	EC:3.6.1.23; EC:3.6.1.9	dUTP diphosphatase; Nucleotide diphosphatase	IPR036157 (G3DSA:2.70.40.GENE3D); IPR008181 (TIGRFAM); IPR029054 (PFAM); IPR008181 (PANTHER); PTHR11241:SF0 (PANTHER); IPR008181 (HAMAP); IPR033704 (CDD); IPR036157 (SUPERFAMILY)	P:GO:0006226; P:GO:0046081; F:GO:0000287; F:GO:0004170	P:dUMP biosynthetic process; P:dUTP catabolic process; F:magnesium ion binding; F:dUTP diphosphatase activity
WP_003095122.1	MULTISPECIES: RNA polymerase-binding protein DksA [Pseudomonas]	50	7	60	7	17.3	1699	7	0	7	Yes	1.04119	0.408746		1.51898	0.000943583	Up	1.67156	7.87717e-05	Up	-1.64542	0.00191035	Lower	PA4723	dksA	suppressor protein DksA	dksA	1.00589	0.969822	T	P:GO:0045861; P:GO:0045892; P:GO:0051055; P:GO:1901857; P:GO:2000679; F:GO:0008270; F:GO:0070063; C:GO:0005829	P:negative regulation of proteolysis; P:negative regulation of transcription, DNA-templated; P:negative regulation of lipid biosynthetic process; P:positive regulation of cellular respiration; P:positive regulation of transcription regulatory region DNA binding; F:zinc ion binding; F:RNA polymerase binding; C:cytosol			Coil (COILS); IPR020460 (PRINTS); IPR012784 (TIGRFAM); G3DSA:1.20.120.910 (GENE3D); IPR000962 (PFAM); mobidb-lite (MOBIDB_LITE); mobidb-lite (MOBIDB_LITE); mobidb-lite (MOBIDB_LITE); PTHR33823 (PANTHER); PTHR33823:SF2 (PANTHER); IPR020458 (PROSITE_PATTERNS); IPR000962 (PROSITE_PROFILES); IPR012784 (HAMAP); IPR037187 (SUPERFAMILY); SSF57716 (SUPERFAMILY)	F:GO:0008270	F:zinc ion binding
WP_003093723.1	MULTISPECIES: 50S ribosomal protein L16 [Pseudomonas]	36	5	41	5	15.4	762	5	0	5	Yes	-1.0631	0.190701		1.03544	0.417779		1.67089	1.69536e-06	Up	1.03524	0.237738		PA4256	rplP	50S ribosomal protein L16	rplP	2.58929	0.00705236	J	P:GO:0000027; P:GO:0006412; F:GO:0000049; F:GO:0003735; F:GO:0019843; C:GO:0005886	P:ribosomal large subunit assembly; P:translation; F:tRNA binding; F:structural constituent of ribosome; F:rRNA binding; C:plasma membrane			IPR000114 (PRINTS); IPR036920 (G3DSA:3.90.1170.GENE3D); IPR000114 (TIGRFAM); IPR016180 (PFAM); IPR000114 (PANTHER); IPR020798 (PROSITE_PATTERNS); IPR020798 (PROSITE_PATTERNS); IPR000114 (HAMAP); IPR016180 (CDD); IPR036920 (SUPERFAMILY)	P:GO:0006412; F:GO:0003735; F:GO:0019843; C:GO:0005840	P:translation; F:structural constituent of ribosome; F:rRNA binding; C:ribosome
WP_003113739.1	MULTISPECIES: hypothetical protein [Pseudomonas]	26	5	9	5	29	317	5	0	5	Yes	-1.12088	0.0804761		1.58203	2.00085e-05	Up	1.67026	2.49789e-05	Up	-1.3	0.00240426		PA2260		hypothetical protein	PA2260	1.54973	0.0273451	G	P:GO:0090305; F:GO:0004519; F:GO:0016853	P:nucleic acid phosphodiester bond hydrolysis; F:endonuclease activity; F:isomerase activity	EC:3.1; EC:5	Acting on ester bonds; Isomerases	G3DSA:3.20.20.150 (GENE3D); IPR036237 (SUPERFAMILY)	no GO terms	no GO terms
WP_003100355.1	MULTISPECIES: DUF1127 domain-containing protein [Pseudomonas]	39	3	7	3	9.4	171	3	0	3	Yes	1.1612	0.129649		2.05823	0.00267986	Up	1.66988	0.00043815	Up	0.962867	0.452632		PA2031		hypothetical protein	PA2031	-1.1148	0.590464						IPR009506 (PFAM)	no GO terms	no GO terms
WP_016253127.1	phosphonate metabolism protein PhnP [Pseudomonas aeruginosa]	17	3	4	3	27.9	70	3	0	3	Yes	-1.01014	0.810473		1.71773	1.40425e-05	Up	1.66581	4.03191e-05	Up				PA3372		conserved hypothetical protein	PA3372	1.31371	0.126286	S	P:GO:0019700; F:GO:0016829; F:GO:0030145; F:GO:0103043	P:organic phosphonate catabolic process; F:lyase activity; F:manganese ion binding; F:5-phospho-alpha-D-ribosyl 1,2-cyclic phosphate phosphodiesterase activity	EC:4; EC:3.1.4.55	Lyases; Phosphoribosyl 1,2-cyclic phosphate phosphodiesterase	IPR001279 (PFAM); IPR017693 (TIGRFAM); IPR036866 (G3DSA:3.60.15.GENE3D); PTHR42663:SF6 (PANTHER); PTHR42663 (PANTHER); IPR035682 (CDD); IPR036866 (SUPERFAMILY)	P:GO:0019700; F:GO:0008081	P:organic phosphonate catabolic process; F:phosphoric diester hydrolase activity
WP_003086001.1	MULTISPECIES: 30S ribosomal protein S12 methylthiotransferase RimO [Pseudomonas]	31	10	23	10	48.9	670	10	0	10	Yes	1.03441	0.298004		1.22591	0.000691798		1.66338	1.48818e-05	Up	1.12982	0.00772217		PA0916		conserved hypothetical protein	PA0916	-2.15338	3.43e-05	J	P:GO:0006400; P:GO:0018339; F:GO:0035599; F:GO:0046872; F:GO:0051539; F:GO:0103039; C:GO:0005829; C:GO:0005840	P:tRNA modification; P:peptidyl-L-beta-methylthioaspartic acid biosynthetic process from peptidyl-aspartic acid; F:aspartic acid methylthiotransferase activity; F:metal ion binding; F:4 iron, 4 sulfur cluster binding; F:protein methylthiotransferase activity; C:cytosol; C:ribosome	EC:2.8.4.4	[Ribosomal protein S12] (aspartate(89)-C(3))-methylthiotransferase	IPR005839 (TIGRFAM); IPR013848 (PFAM); IPR005840 (TIGRFAM); IPR007197 (PFAM); IPR038135 (G3DSA:3.40.50.GENE3D); G3DSA:2.40.50.140 (GENE3D); IPR041582 (PFAM); IPR023404 (G3DSA:3.80.30.GENE3D); IPR005839 (SFLD); IPR005840 (SFLD); SFLDG01082 (SFLD); IPR005840 (PANTHER); IPR020612 (PROSITE_PATTERNS); IPR013848 (PROSITE_PROFILES); IPR005840 (HAMAP); IPR002792 (PROSITE_PROFILES); IPR007197 (PROSITE_PRO…	P:GO:0006400; P:GO:0018339; F:GO:0003824; F:GO:0016740; F:GO:0035596; F:GO:0051536; F:GO:0051539; C:GO:0005737	P:tRNA modification; P:peptidyl-L-beta-methylthioaspartic acid biosynthetic process from peptidyl-aspartic acid; F:catalytic activity; F:transferase activity; F:methylthiotransferase activity; F:iron-sulfur cluster binding; F:4 iron, 4 sulfur cluster binding; C:cytoplasm
WP_003093734.1	MULTISPECIES: 30S ribosomal protein S19 [Pseudomonas]	44	4	23	4	10.4	596	4	0	4	Yes	-1.05254	0.479611		1.05186	0.410911		1.66288	0.000378498	Up	-1.18833	0.0151692		PA4259	rpsS	30S ribosomal protein S19	rpsS	2.41213	0.00394852	J	P:GO:0000028; P:GO:0006412; F:GO:0003735; F:GO:0019843; C:GO:0005886	P:ribosomal small subunit assembly; P:translation; F:structural constituent of ribosome; F:rRNA binding; C:plasma membrane			IPR002222 (PRINTS); IPR002222 (PIRSF); IPR023575 (G3DSA:3.30.860.GENE3D); IPR005732 (TIGRFAM); IPR002222 (PFAM); PTHR11880:SF8 (PANTHER); IPR002222 (PANTHER); IPR020934 (PROSITE_PATTERNS); IPR002222 (HAMAP); IPR023575 (SUPERFAMILY)	P:GO:0006412; F:GO:0003723; F:GO:0003735; C:GO:0005840; C:GO:0015935	P:translation; F:RNA binding; F:structural constituent of ribosome; C:ribosome; C:small ribosomal subunit
WP_003099724.1	MULTISPECIES: cysteine hydrolase [Pseudomonas]	25	4	10	4	24.2	418	4	0	4	Yes	1.00508	0.954156		1.32837	0.0268612		1.66046	0.00545286	Up	0.916822	0.457746		PA5507		hypothetical protein	PA5507	1.25541	0.456117	Q	F:GO:0016787	F:hydrolase activity	EC:3	Hydrolases	IPR036380 (G3DSA:3.40.50.GENE3D); IPR000868 (PFAM); PTHR43540:SF1 (PANTHER); PTHR43540 (PANTHER); cd00431 (CDD); IPR036380 (SUPERFAMILY)	no GO terms	no GO terms
WP_003085224.1	MULTISPECIES: 2-nonaprenyl-3-methyl-6-methoxy-1,4-benzoquinol hydroxylase [Pseudomonas]	43	6	9	6	23.6	397	6	0	6	Yes	1.07635	0.00755051		1.65769	5.64527e-07	Up	1.65991	6.12753e-07	Up	1.29849	1.15798e-05		PA0655		hypothetical protein	PA0655	-1.08959	0.448934	H	P:GO:0006744; F:GO:0004497; F:GO:0046872; C:GO:0005886; C:GO:0016021	P:ubiquinone biosynthetic process; F:monooxygenase activity; F:metal ion binding; C:plasma membrane; C:integral component of membrane	EC:1	Oxidoreductases	IPR012347 (G3DSA:1.20.1260.GENE3D); IPR011566 (PFAM); IPR011566 (PANTHER); IPR011566 (HAMAP); IPR011566 (CDD); IPR009078 (SUPERFAMILY)	P:GO:0006744; F:GO:0004497	P:ubiquinone biosynthetic process; F:monooxygenase activity
WP_003095503.1	MULTISPECIES: bacterioferritin [Pseudomonas]	65	9	27	9	20.2	773	9	0	9	Yes	1.07877	0.0307044		1.34205	0.000225777		1.6596	0.000108801	Up	4.51617	8.65047e-05	Higher	PA4880		probable bacterioferritin	PA4880	-1.05701	0.830101	P	P:GO:0006826; P:GO:0006879; F:GO:0004322; F:GO:0008199	P:iron ion transport; P:cellular iron ion homeostasis; F:ferroxidase activity; F:ferric iron binding	EC:1.16.3.1	Ferroxidase	Coil (COILS); IPR002024 (PRINTS); IPR012347 (G3DSA:1.20.1260.GENE3D); IPR008331 (PFAM); IPR014490 (PIRSF); PTHR30295 (PANTHER); PTHR30295:SF1 (PANTHER); IPR009040 (PROSITE_PROFILES); cd00657 (CDD); IPR009078 (SUPERFAMILY)	P:GO:0006826; P:GO:0006879; F:GO:0008199	P:iron ion transport; P:cellular iron ion homeostasis; F:ferric iron binding
WP_003108746.1	MULTISPECIES: PhoX family phosphatase [Pseudomonas]	19	11	21	11	73.8	658	11	0	11	Yes	-1.12376	0.0296444		-2.41758	1.86039e-06	Down	1.65261	0.000105695	Up	4.4659	3.02204e-08	Higher	PA2635		hypothetical protein	PA2635	-1.31067	0.108758	S					IPR008557 (PFAM); PTHR35399 (PANTHER); PTHR35399:SF2 (PANTHER); IPR006311 (PROSITE_PROFILES); SSF63829 (SUPERFAMILY)	no GO terms	no GO terms
WP_003095248.1	MULTISPECIES: protein CueR [Pseudomonas]	36	5	12	5	15	306	5	0	5	Yes	1.07605	0.0753522		1.30195	0.003782		1.6478	2.79217e-05	Up	-5.02128	1.87835e-09	Lower	PA4778	cueR	CueR	cueR	1.2782	0.195503	K	P:GO:0045893; F:GO:0000976; F:GO:0001216; F:GO:0005507; C:GO:0005737; C:GO:0032993	P:positive regulation of transcription, DNA-templated; F:transcription cis-regulatory region binding; F:DNA-binding transcription activator activity; F:copper ion binding; C:cytoplasm; C:protein-DNA complex			Coil (COILS); IPR000551 (PRINTS); IPR000551 (PFAM); IPR011789 (TIGRFAM); G3DSA:1.10.1660.10 (GENE3D); IPR015358 (PFAM); PTHR30204:SF73 (PANTHER); PTHR30204 (PANTHER); IPR000551 (PROSITE_PROFILES); IPR011789 (CDD); IPR009061 (SUPERFAMILY)	P:GO:0006355; P:GO:0045893; F:GO:0003677; F:GO:0003700; F:GO:0005507	P:regulation of transcription, DNA-templated; P:positive regulation of transcription, DNA-templated; F:DNA binding; F:DNA-binding transcription factor activity; F:copper ion binding
WP_003098041.1	MULTISPECIES: DUF1289 domain-containing protein [Pseudomonas]	13	2	6	2	18.2	174	2	0	2	Yes	-1.01144	0.988338		1.09743	0.353696		1.64421	0.0125666	Up	1.74152	0.0081445	Higher	PA1788		hypothetical protein	PA1788	-1.15489	0.0473851	S					IPR010710 (PFAM); IPR010710 (PANTHER); PTHR35175:SF1 (PANTHER)	no GO terms	no GO terms
WP_003095925.1	MULTISPECIES: RidA family protein [Pseudomonas]	36	3	9	3	12.6	266	3	0	3	Yes	1.01871	0.29791		1.28677	3.28431e-05		1.64355	2.55142e-06	Up	-1.29742	0.00145139		PA5083	dguB	Rid2 subfamily protein	PA5083	-1.03459	0.801577	J	F:GO:0016787	F:hydrolase activity	EC:3	Hydrolases	IPR035959 (G3DSA:3.30.1330.GENE3D); IPR006175 (PFAM); IPR035709 (PANTHER); IPR035709 (CDD); IPR035959 (SUPERFAMILY)	no GO terms	no GO terms
WP_003098216.1	MULTISPECIES: ATP-dependent DNA helicase [Pseudomonas]	3	2	3	2	85.5	114	2	0	2	Yes	1.07147	0.404727		1.67683	0.000487045	Up	1.6411	0.000533039	Up	1.04981	0.638929		PA1866		hypothetical protein	PA1866	-1.40321	0.0355323	KL	P:GO:0006139; P:GO:0032508; F:GO:0003677; F:GO:0003678; F:GO:0005524; F:GO:0016818	P:nucleobase-containing compound metabolic process; P:DNA duplex unwinding; F:DNA binding; F:DNA helicase activity; F:ATP binding; F:hydrolase activity, acting on acid anhydrides, in phosphorus-containing anhydrides	EC:3.6.1; EC:3.6.4.12	Acting on acid anhydrides; DNA helicase	Coil (COILS); IPR011604 (G3DSA:3.90.320.GENE3D); G3DSA:1.10.275.30 (GENE3D); IPR010614 (PFAM); IPR027417 (G3DSA:3.40.50.GENE3D); IPR006555 (PFAM); IPR027417 (G3DSA:3.40.50.GENE3D); PTHR11472:SF34 (PANTHER); IPR045028 (PANTHER); IPR014013 (PROSITE_PROFILES); IPR027417 (SUPERFAMILY); IPR027417 (SUPERFAMILY)	P:GO:0006139; F:GO:0003676; F:GO:0003677; F:GO:0003678; F:GO:0004386; F:GO:0005524; F:GO:0016818	P:nucleobase-containing compound metabolic process; F:nucleic acid binding; F:DNA binding; F:DNA helicase activity; F:helicase activity; F:ATP binding; F:hydrolase activity, acting on acid anhydrides, in phosphorus-containing anhydrides
WP_023465030.1	single-stranded-DNA-specific exonuclease RecJ [Pseudomonas aeruginosa]	8	3	3	3	62.2	94	3	0	3	Yes	-1.04018	0.591524		1.06411	0.469754		1.63466	0.0022912	Up	1.55398	0.03961	Higher	PA3725	recJ	single-stranded-DNA-specific exonuclease RecJ	recJ	-1.32154	0.0343758	L	P:GO:0006281; P:GO:0006310; P:GO:0010165; P:GO:0090305; F:GO:0003676; F:GO:0045145	P:DNA repair; P:DNA recombination; P:response to X-ray; P:nucleic acid phosphodiester bond hydrolysis; F:nucleic acid binding; F:single-stranded DNA 5'-3' exodeoxyribonuclease activity	EC:3.1.11; EC:3.1.15	Acting on ester bonds; Acting on ester bonds	G3DSA:3.90.1640.30 (GENE3D); IPR004610 (TIGRFAM); G3DSA:3.10.310.30 (GENE3D); IPR003156 (PFAM); IPR001667 (PFAM); IPR041122 (PFAM); PTHR30255 (PANTHER); IPR038763 (SUPERFAMILY)	P:GO:0006281; P:GO:0006310; F:GO:0003676; F:GO:0008409	P:DNA repair; P:DNA recombination; F:nucleic acid binding; F:5'-3' exonuclease activity
WP_003114813.1	MULTISPECIES: alpha/beta hydrolase [Pseudomonas]	13	3	4	3	30.5	134	3	0	3	Yes	1.08941	0.356914		1.27312	0.0133438		1.63227	0.00434037	Up	-1.31904	0.0371849		PA3226		probable hydrolase	PA3226	1.32955	0.174577	S	F:GO:0047570	F:3-oxoadipate enol-lactonase activity	EC:3.1.1.24; EC:3.1.1.1	3-oxoadipate enol-lactonase; Carboxylesterase	IPR000073 (PRINTS); IPR029058 (G3DSA:3.40.50.GENE3D); IPR000073 (PFAM); PTHR43433 (PANTHER); IPR029058 (SUPERFAMILY)	no GO terms	no GO terms
WP_003087820.1	MULTISPECIES: alpha/beta hydrolase [Pseudomonas]	6	2	2	2	36.9	76	2	0	2	Yes	0.997126	0.903383		-1.02453	0.639852		1.63051	0.000348587	Up	5.37452	0.00131239	Higher	PA1771	estX	EstX	estX	-1.36114	0.0173032	S	F:GO:0016787	F:hydrolase activity	EC:3	Hydrolases	IPR029058 (G3DSA:3.40.50.GENE3D); IPR029058 (G3DSA:3.40.50.GENE3D); IPR000073 (PFAM); PTHR11005 (PANTHER); IPR029058 (SUPERFAMILY)	no GO terms	no GO terms
WP_003082443.1	MULTISPECIES: LysR family transcriptional regulator [Pseudomonas]	7	2	3	2	32.2	131	2	0	2	Yes	1.02814	0.576369		1.0571	0.309355		1.63007	0.000423043	Up	1.24272	0.0174428		PA1184		probable transcriptional regulator	PA1184	1.02752	0.691856	K	P:GO:0006355; F:GO:0003700; F:GO:0043565	P:regulation of transcription, DNA-templated; F:DNA-binding transcription factor activity; F:sequence-specific DNA binding			G3DSA:3.40.190.10 (GENE3D); IPR005119 (PFAM); G3DSA:3.40.190.10 (GENE3D); IPR036388 (G3DSA:1.10.10.GENE3D); IPR000847 (PFAM); PTHR30537:SF26 (PANTHER); PTHR30537 (PANTHER); IPR000847 (PROSITE_PROFILES); cd08432 (CDD); SSF53850 (SUPERFAMILY); IPR036390 (SUPERFAMILY)	P:GO:0006355; F:GO:0003700	P:regulation of transcription, DNA-templated; F:DNA-binding transcription factor activity
WP_003094064.1	MULTISPECIES: molecular chaperone GroES [Pseudomonas]	57	5	38	5	10.3	1408	5	0	5	Yes	1.0229	0.739206		1.53962	0.0218942	Up	1.62987	0.000865206	Up	0.819137	0.114427		PA4386	groES	GroES protein	groES	1.67712	0.00791732	O	P:GO:0009408; P:GO:0019068; P:GO:0044403; P:GO:0051085; F:GO:0005524; F:GO:0016887; F:GO:0042802; F:GO:0046872; F:GO:0051082; F:GO:0051087; C:GO:1990220	P:response to heat; P:virion assembly; P:biological process involved in symbiotic interaction; P:chaperone cofactor-dependent protein refolding; F:ATP binding; F:ATP hydrolysis activity; F:identical protein binding; F:metal ion binding; F:unfolded protein binding; F:chaperone binding; C:GroEL-GroES complex	EC:3.6.1	Acting on acid anhydrides	IPR020818 (PRINTS); IPR020818 (PFAM); IPR037124 (G3DSA:2.30.33.GENE3D); PTHR10772:SF24 (PANTHER); IPR020818 (PANTHER); IPR018369 (PROSITE_PATTERNS); IPR020818 (HAMAP); IPR020818 (CDD); IPR011032 (SUPERFAMILY)	P:GO:0006457; F:GO:0005524; F:GO:0016887	P:protein folding; F:ATP binding; F:ATP hydrolysis activity
WP_003092645.1	MULTISPECIES: signal recognition particle protein [Pseudomonas]	42	15	35	15	49.3	923	15	0	15	Yes	-1.03948	0.422614		1.1123	0.0892624		1.62868	0.000113644	Up	1.17269	0.0181468		PA3746	ffh	signal recognition particle protein Ffh	ffh	-1.26527	0.00181392	U	P:GO:0006614; P:GO:0015833; F:GO:0003924; F:GO:0005525; F:GO:0008312; F:GO:0032550; C:GO:0005618; C:GO:0005829; C:GO:0005886; C:GO:0048500	P:SRP-dependent cotranslational protein targeting to membrane; P:peptide transport; F:GTPase activity; F:GTP binding; F:7S RNA binding; F:purine ribonucleoside binding; C:cell wall; C:cytosol; C:plasma membrane; C:signal recognition particle	EC:3.6.1	Acting on acid anhydrides	Coil (COILS); IPR004780 (TIGRFAM); IPR004125 (PFAM); IPR042101 (G3DSA:1.20.120.GENE3D); IPR036891 (G3DSA:1.10.260.GENE3D); IPR013822 (PFAM); IPR000897 (PFAM); IPR027417 (G3DSA:3.40.50.GENE3D); IPR022941 (PANTHER); IPR004780 (PTHR11564:PANTHER); IPR000897 (PROSITE_PATTERNS); IPR022941 (HAMAP); cd18539 (CDD); IPR027417 (SUPERFAMILY); IPR036891 (SUPERFAMILY)	P:GO:0006614; F:GO:0003924; F:GO:0005525; F:GO:0008312; C:GO:0048500	P:SRP-dependent cotranslational protein targeting to membrane; F:GTPase activity; F:GTP binding; F:7S RNA binding; C:signal recognition particle
WP_003097311.1	MULTISPECIES: coproporphyrinogen III oxidase [Pseudomonas]	32	9	20	9	34.8	519	9	0	9	Yes	1.01012	0.864112		1.31009	0.00125439		1.62834	0.000949162	Up	1.00395	0.913834		PA0024	hemF	coproporphyrinogen III oxidase, aerobic	hemF	-1.17964	0.186479	H	P:GO:0006782; F:GO:0004109; F:GO:0030145; F:GO:0042803; F:GO:0046906; C:GO:0005737	P:protoporphyrinogen IX biosynthetic process; F:coproporphyrinogen oxidase activity; F:manganese ion binding; F:protein homodimerization activity; F:tetrapyrrole binding; C:cytoplasm	EC:1.3.3.3	Coproporphyrinogen oxidase	IPR001260 (PRINTS); IPR001260 (PIRSF); IPR001260 (PFAM); IPR036406 (G3DSA:3.40.1500.GENE3D); IPR001260 (PANTHER); IPR018375 (PROSITE_PATTERNS); IPR001260 (HAMAP); IPR036406 (SUPERFAMILY)	P:GO:0006779; F:GO:0004109	P:porphyrin-containing compound biosynthetic process; F:coproporphyrinogen oxidase activity
WP_003099547.1	MULTISPECIES: molecular chaperone DjlA [Pseudomonas]	17	4	6	4	28	143	4	0	4	Yes	1.0628	0.494801		1.36605	0.0117644		1.62259	0.00152836	Up	0.877839	0.157069		PA0598		hypothetical protein	PA0598	1.34535	0.0320516	O	C:GO:0016021	C:integral component of membrane			Coil (COILS); IPR001623 (PRINTS); IPR029024 (G3DSA:1.10.3680.GENE3D); IPR001623 (PFAM); IPR036869 (G3DSA:1.10.287.GENE3D); IPR001623 (PROSITE_PROFILES); cd07316 (CDD); IPR001623 (CDD); IPR036869 (SUPERFAMILY); IPR029024 (SUPERFAMILY)	no GO terms	no GO terms
WP_003110353.1	MULTISPECIES: glycosyltransferase family 1 protein [Pseudomonas]	16	7	16	7	52.3	337	7	0	7	Yes	1.02234	0.642766		1.28886	0.0053993		1.62148	0.000214535	Up	1.27209	0.00214324		PA5449	wbpX	glycosyltransferase WbpX	wbpX	-1.04277	0.610262	M	F:GO:0016757	F:glycosyltransferase activity	EC:2.4	Glycosyltransferases	G3DSA:3.40.50.2000 (GENE3D); IPR001296 (PFAM); PTHR46401:SF7 (PANTHER); PTHR46401 (PANTHER); cd03809 (CDD); SSF53756 (SUPERFAMILY)	F:GO:0016757	F:glycosyltransferase activity
WP_003084633.1	MULTISPECIES: multidrug efflux RND transporter outer membrane channel subunit OprM [Pseudomonas]	44	18	52	18	52.6	1863	18	0	18	Yes	-1.06542	0.304177		1.29174	0.00278839		1.61932	0.0973182		-2.84335	0.000658943	Lower	PA0427	oprM	Major intrinsic multiple antibiotic resistance efflux outer membrane protein OprM precursor	oprM	1.73887	0.00577578	MU	P:GO:0042908; P:GO:0046677; P:GO:0055085; F:GO:0015562; F:GO:0042910; C:GO:0009279; C:GO:0016021	P:xenobiotic transport; P:response to antibiotic; P:transmembrane transport; F:efflux transmembrane transporter activity; F:xenobiotic transmembrane transporter activity; C:cell outer membrane; C:integral component of membrane	EC:7	Translocases	Coil (COILS); G3DSA:1.20.1600.10 (GENE3D); IPR010131 (TIGRFAM); G3DSA:2.20.200.10 (GENE3D); IPR003423 (PFAM); PTHR30203 (PANTHER); PS51257 (PROSITE_PROFILES); SSF56954 (SUPERFAMILY)	P:GO:0055085; F:GO:0015562; F:GO:0022857; C:GO:0016020	P:transmembrane transport; F:efflux transmembrane transporter activity; F:transmembrane transporter activity; C:membrane
WP_003092393.1	MULTISPECIES: elongation factor Ts [Pseudomonas]	65	16	153	16	30.6	5004	16	0	16	Yes	1.01577	0.46185		1.30663	7.32685e-06		1.61519	3.23773e-05	Up	0.96402	0.0705999		PA3655	tsf	elongation factor Ts	tsf	2.10097	0.0103323	J	P:GO:0006414; P:GO:0065009; F:GO:0003746; F:GO:0005085; F:GO:0008270; F:GO:0051020; F:GO:2001065; C:GO:0005829	P:translational elongation; P:regulation of molecular function; F:translation elongation factor activity; F:guanyl-nucleotide exchange factor activity; F:zinc ion binding; F:GTPase binding; F:mannan binding; C:cytosol			G3DSA:1.10.8.10 (GENE3D); IPR036402 (G3DSA:3.30.479.GENE3D); G3DSA:1.10.286.20 (GENE3D); IPR014039 (PFAM); IPR001816 (TIGRFAM); IPR036402 (G3DSA:3.30.479.GENE3D); IPR001816 (PANTHER); PTHR11741:SF0 (PANTHER); IPR018101 (PROSITE_PATTERNS); IPR018101 (PROSITE_PATTERNS); IPR001816 (HAMAP); cd14275 (CDD); IPR036402 (SUPERFAMILY); IPR036402 (SUPERFAMILY); IPR009060 (SUPERFAMILY)	P:GO:0006414; F:GO:0003746; F:GO:0005515	P:translational elongation; F:translation elongation factor activity; F:protein binding
WP_003101608.1	MULTISPECIES: NAD(P)/FAD-dependent oxidoreductase [Pseudomonas]	10	5	8	5	42.6	60	5	0	5	Yes	-1.12249	0.0573669		1.27367	0.00480729		1.61411	0.00166661	Up	-2.5222	0.00116632	Lower	PA0559		conserved hypothetical protein	PA0559	-1.2052	0.0284016	S	C:GO:0005829; C:GO:0016021	C:cytosol; C:integral component of membrane			PR00411 (PRINTS); PR00368 (PRINTS); IPR036188 (G3DSA:3.50.50.GENE3D); PF03486 (PFAM); G3DSA:2.40.30.10 (GENE3D); IPR023166 (G3DSA:1.10.8.GENE3D); IPR004792 (TIGRFAM); PTHR42887:SF2 (PANTHER); IPR004792 (PANTHER); IPR036188 (SUPERFAMILY); SSF160996 (SUPERFAMILY)	no GO terms	no GO terms
WP_003093967.1	MULTISPECIES: FprA family A-type flavoprotein [Pseudomonas]	22	4	6	4	29.5	119	4	0	4	Yes	1.11206	0.197694		1.53877	0.0307968	Up	1.61356	0.00916316	Up	3.34002	1.01181e-07	Higher	PA4348		conserved hypothetical protein	PA4348	-1.11005	0.670875	C	F:GO:0016787	F:hydrolase activity	EC:3	Hydrolases	IPR045761 (PFAM); IPR036866 (G3DSA:3.60.15.GENE3D); PTHR43041 (PANTHER); cd07709 (CDD); IPR036866 (SUPERFAMILY)	no GO terms	no GO terms
WP_003114374.1	MULTISPECIES: chorismate--pyruvate lyase [Pseudomonas]	29	5	10	5	19.5	215	5	0	5	Yes	1.05113	0.465707		1.42198	0.0012657		1.61122	0.000241739	Up	-1.28685	0.00334398		PA5357		hypothetical protein	PA5357	-1.42999	0.00312737	H	P:GO:0006744; P:GO:0042866; F:GO:0008813; C:GO:0005829	P:ubiquinone biosynthetic process; P:pyruvate biosynthetic process; F:chorismate lyase activity; C:cytosol	EC:4.1.3.40	Chorismate lyase	IPR028978 (G3DSA:3.40.1410.GENE3D); IPR007440 (PFAM); IPR007440 (PANTHER); IPR007440 (HAMAP); IPR028978 (SUPERFAMILY)	P:GO:0006744; F:GO:0008813; C:GO:0005737	P:ubiquinone biosynthetic process; F:chorismate lyase activity; C:cytoplasm
WP_003085920.1	MULTISPECIES: CoA ester lyase [Pseudomonas]	21	5	7	5	29	133	5	0	5	Yes	1.12954	0.0403527		1.35487	0.0389521		1.60948	0.00560106	Up	-1.54901	0.00658224	Lower	PA0883		probable acyl-CoA lyase beta chain	PA0883	1.1219	0.636306	G	P:GO:0006107; F:GO:0000287; F:GO:0016829	P:oxaloacetate metabolic process; F:magnesium ion binding; F:lyase activity	EC:4	Lyases	IPR040442 (G3DSA:3.20.20.GENE3D); IPR011206 (PIRSF); IPR005000 (PFAM); PTHR32308:SF10 (PANTHER); PTHR32308 (PANTHER); IPR015813 (SUPERFAMILY)	F:GO:0003824	F:catalytic activity
WP_003098172.1	MULTISPECIES: histidine phosphatase family protein [Pseudomonas]	24	5	12	5	26.4	255	5	0	5	Yes	1.00248	0.942089		1.4654	0.000488119		1.60906	0.000129702	Up	1.1686	0.056594		PA1831		hypothetical protein	PA1831	1.29004	0.289571	G	F:GO:0016868; C:GO:0005737	F:intramolecular transferase activity, phosphotransferases; C:cytoplasm	EC:5.4.2	Intramolecular transferases	IPR013078 (PFAM); IPR029033 (G3DSA:3.40.50.GENE3D); PTHR48100 (PANTHER); PTHR48100:SF18 (PANTHER); IPR013078 (CDD); IPR029033 (SUPERFAMILY)	no GO terms	no GO terms
WP_003092213.1	MULTISPECIES: 50S ribosomal protein L31 type B [Pseudomonas]	34	2	4	2	9.5	121	2	0	2	Yes	-1.00997	0.973179		1.20273	0.51022		1.6082	0.198584		-12.9879	0.00205961	Lower	PA3601		conserved hypothetical protein	PA3601	-1.05289	0.837078	J	P:GO:0006412; P:GO:0034224; F:GO:0003735; C:GO:0005840	P:translation; P:cellular response to zinc ion starvation; F:structural constituent of ribosome; C:ribosome			IPR002150 (PRINTS); IPR002150 (PFAM); IPR042105 (G3DSA:4.10.830.GENE3D); IPR002150 (TIGRFAM); PTHR33280:SF6 (PANTHER); IPR002150 (PANTHER); IPR002150 (PROSITE_PATTERNS); IPR027493 (HAMAP); IPR034704 (SUPERFAMILY)	P:GO:0006412; F:GO:0003735; C:GO:0005840	P:translation; F:structural constituent of ribosome; C:ribosome
WP_003083938.1	MULTISPECIES: chemotaxis protein CheW [Pseudomonas]	16	2	4	2	17.5	92	2	0	2	Yes	1.09309	0.641798		1.24069	0.323524		1.60638	0.09491		-21.3843	0.00014035	Lower	PA0177		probable purine-binding chemotaxis protein	PA0177	-1.10752	0.544161	NT	P:GO:0006935; P:GO:0007165; C:GO:0005829	P:chemotaxis; P:signal transduction; C:cytosol			G3DSA:2.40.50.180 (GENE3D); IPR002545 (PFAM); G3DSA:2.30.30.40 (GENE3D); PTHR22617:SF23 (PANTHER); IPR039315 (PANTHER); IPR002545 (PROSITE_PROFILES); cd00732 (CDD); IPR036061 (SUPERFAMILY)	P:GO:0006935; P:GO:0007165	P:chemotaxis; P:signal transduction
WP_003092567.1	MULTISPECIES: FKBP-type peptidyl-prolyl cis-trans isomerase [Pseudomonas]	32	3	6	3	12.6	249	3	0	3	Yes	-1.05917	0.455459		1.09873	0.278324		1.60124	0.000433268	Up	1.32823	0.000822501		PA3717		probable peptidyl-prolyl cis-trans isomerase, FkbP-type	PA3717	-1.24174	0.000656762	G	P:GO:0000413; P:GO:0061077; F:GO:0003755	P:protein peptidyl-prolyl isomerization; P:chaperone-mediated protein folding; F:peptidyl-prolyl cis-trans isomerase activity	EC:5.2.1.8	Peptidylprolyl isomerase	IPR001179 (PFAM); G3DSA:3.10.50.40 (GENE3D); IPR044609 (PANTHER); PTHR45779:SF6 (PANTHER); IPR001179 (PROSITE_PROFILES); SSF54534 (SUPERFAMILY)	P:GO:0000413; P:GO:0061077; F:GO:0003755	P:protein peptidyl-prolyl isomerization; P:chaperone-mediated protein folding; F:peptidyl-prolyl cis-trans isomerase activity
WP_003146528.1	MULTISPECIES: redox-regulated molecular chaperone Hsp33 [Pseudomonas]	26	7	20	7	32.8	646	7	0	7	Yes	1.04688	0.453843		1.31087	0.00618874		1.60059	0.000278826	Up	-1.21126	0.00637821		PA5193	yrfI	heat shock protein HSP33	yrfI	-1.20435	0.0130535	O	P:GO:0006979; P:GO:0009408; P:GO:0036506; P:GO:0042026; F:GO:0008270; F:GO:0042802; F:GO:0044183; F:GO:0051082; C:GO:0005829	P:response to oxidative stress; P:response to heat; P:maintenance of unfolded protein; P:protein refolding; F:zinc ion binding; F:identical protein binding; F:protein folding chaperone; F:unfolded protein binding; C:cytosol			IPR016153 (G3DSA:3.55.30.GENE3D); IPR000397 (PFAM); IPR000397 (PIRSF); IPR016154 (G3DSA:3.90.1280.GENE3D); IPR023212 (G3DSA:1.10.287.GENE3D); IPR000397 (PANTHER); IPR000397 (HAMAP); IPR000397 (CDD); IPR016153 (SUPERFAMILY); IPR016154 (SUPERFAMILY)	P:GO:0006457; F:GO:0051082; C:GO:0005737	P:protein folding; F:unfolded protein binding; C:cytoplasm
WP_003096263.1	MULTISPECIES: PaaI family thioesterase [Pseudomonas]	19	3	5	3	13.8	116	3	0	3	Yes	1.02155	0.637286		1.2883	0.00133138		1.6	7.45654e-06	Up	1.73744	0.00103133	Higher	PA5202		hypothetical protein	PA5202	1.02317	0.904522	Q	F:GO:0061522; C:GO:0005829	F:1,4-dihydroxy-2-naphthoyl-CoA thioesterase activity; C:cytosol	EC:3.1.2	Acting on ester bonds	IPR006683 (PFAM); G3DSA:3.10.129.10 (GENE3D); IPR003736 (TIGRFAM); PTHR43240 (PANTHER); PTHR43240:SF1 (PANTHER); cd03443 (CDD); IPR029069 (SUPERFAMILY)	no GO terms	no GO terms
WP_003085996.1	MULTISPECIES: magnesium transporter [Pseudomonas]	30	12	31	12	53.8	982	12	0	12	Yes	1.16013	0.0254493		1.29767	0.00288493		1.6	9.98211e-05	Up	-1.41827	0.000883858		PA0913	mgtE	MgtE	mgtE	-1.50683	2.97e-05	P	P:GO:1903830; F:GO:0000287; F:GO:0015095; C:GO:0005886; C:GO:0016021	P:magnesium ion transmembrane transport; F:magnesium ion binding; F:magnesium ion transmembrane transporter activity; C:plasma membrane; C:integral component of membrane	EC:7	Translocases	IPR006667 (PFAM); IPR038076 (G3DSA:1.25.60.GENE3D); IPR000644 (PFAM); G3DSA:3.10.580.10 (GENE3D); IPR006669 (TIGRFAM); IPR036739 (G3DSA:1.10.357.GENE3D); IPR006668 (PFAM); IPR006669 (PANTHER); PTHR43773:SF3 (PANTHER); IPR000644 (PROSITE_PROFILES); IPR000644 (PROSITE_PROFILES); cd04606 (CDD); SSF54631 (SUPERFAMILY); IPR036739 (SUPERFAMILY); SSF158791 (SUPERFAMILY)	P:GO:0006812; P:GO:0015693; F:GO:0008324; F:GO:0015095; C:GO:0016020	P:cation transport; P:magnesium ion transport; F:cation transmembrane transporter activity; F:magnesium ion transmembrane transporter activity; C:membrane
WP_003163315.1	MULTISPECIES: Vi polysaccharide biosynthesis UDP-N-acetylglucosaminuronic acid C-4 epimerase TviC [Pseudomonas]	31	9	28	9	37.6	648	9	0	9	Yes	1.06377	0.0901742		1.43804	7.468e-05		1.59816	3.59269e-05	Up										GM	F:GO:0008460	F:dTDP-glucose 4,6-dehydratase activity	EC:4.2.1.46	dTDP-glucose 4,6-dehydratase	PR01713 (PRINTS); IPR001509 (PFAM); G3DSA:3.40.50.720 (GENE3D); G3DSA:3.90.25.10 (GENE3D); PTHR43245:SF17 (PANTHER); PTHR43245 (PANTHER); cd05256 (CDD); IPR036291 (SUPERFAMILY)	F:GO:0003824	F:catalytic activity
WP_003094164.1	MULTISPECIES: 50S ribosomal protein L13 [Pseudomonas]	55	6	37	6	16	719	6	0	6	Yes	-1.0635	0.198839		-1.03179	0.480136		1.59487	0.00017927	Up	1.15419	0.0220131		PA4433	rplM	50S ribosomal protein L13	rplM	1.44428	0.0953612	J	P:GO:0017148; F:GO:0003729; F:GO:0003735; F:GO:0008270; F:GO:0070180; C:GO:0005618; C:GO:0005886	P:negative regulation of translation; F:mRNA binding; F:structural constituent of ribosome; F:zinc ion binding; F:large ribosomal subunit rRNA binding; C:cell wall; C:plasma membrane			IPR005822 (PFAM); IPR005823 (TIGRFAM); IPR036899 (G3DSA:3.90.1180.GENE3D); IPR005822 (PIRSF); PTHR11545:SF2 (PANTHER); IPR005822 (PANTHER); IPR023563 (PROSITE_PATTERNS); IPR005822 (HAMAP); IPR005822 (CDD); IPR036899 (SUPERFAMILY)	P:GO:0006412; F:GO:0003735; C:GO:0005840	P:translation; F:structural constituent of ribosome; C:ribosome
WP_003113894.1	MULTISPECIES: NUDIX domain-containing protein [Pseudomonas]	14	2	5	2	16.7	195	2	0	2	Yes	-1.05451	0.509822		-1.02111	0.791936		1.59458	0.000872325	Up	1.2714	0.0148592		PA3470		hypothetical protein	PA3470	1.01825	0.870916	L	F:GO:0016787	F:hydrolase activity	EC:3	Hydrolases	IPR000086 (PFAM); G3DSA:3.90.79.10 (GENE3D); mobidb-lite (MOBIDB_LITE); mobidb-lite (MOBIDB_LITE); PTHR43046 (PANTHER); PTHR43046:SF2 (PANTHER); IPR020084 (PROSITE_PATTERNS); IPR000086 (PROSITE_PROFILES); cd04690 (CDD); IPR015797 (SUPERFAMILY)	F:GO:0016787	F:hydrolase activity
WP_003111315.1	MULTISPECIES: ABC-F family ATPase [Pseudomonas]	24	11	22	11	58.7	512	11	0	11	Yes	1.00417	0.903972		1.09789	0.0112582		1.59177	7.90979e-06	Up										S	P:GO:0009409; F:GO:0005524; F:GO:0016887	P:response to cold; F:ATP binding; F:ATP hydrolysis activity	EC:3.6.1	Acting on acid anhydrides	Coil (COILS); IPR003439 (PFAM); IPR032781 (PFAM); IPR027417 (G3DSA:3.40.50.GENE3D); IPR003439 (PFAM); IPR027417 (G3DSA:3.40.50.GENE3D); PTHR19211 (PANTHER); PTHR19211:SF96 (PANTHER); IPR003439 (PROSITE_PROFILES); IPR003439 (PROSITE_PROFILES); cd03221 (CDD); cd03221 (CDD); IPR027417 (SUPERFAMILY); IPR027417 (SUPERFAMILY)	F:GO:0005524	F:ATP binding
WP_003095367.1	MULTISPECIES: translation initiation factor Sui1 [Pseudomonas]	28	2	5	2	12.6	102	2	0	2	Yes	1.0337	0.374764		1.16954	0.11857		1.5914	0.00386003	Up				PA4840		conserved hypothetical protein	PA4840	-1.17306	0.0671304	J	P:GO:0006413; F:GO:0003743; F:GO:0043024	P:translational initiation; F:translation initiation factor activity; F:ribosomal small subunit binding			IPR001950 (PFAM); G3DSA:3.30.780.10 (GENE3D); IPR005872 (PIRSF); IPR005872 (TIGRFAM); IPR001950 (PROSITE_PROFILES); IPR005872 (CDD); IPR036877 (SUPERFAMILY)	P:GO:0006413; F:GO:0003743	P:translational initiation; F:translation initiation factor activity
WP_003091442.1	MULTISPECIES: 30S ribosomal protein S1 [Pseudomonas]	44	19	163	19	61.8	5388	19	0	19	Yes	1.03067	0.0999946		1.11071	0.000245492		1.58979	1.46145e-06	Up	1.16732	4.35222e-05		PA3162	rpsA	30S ribosomal protein S1	rpsA	1.02034	0.875335	J	P:GO:0000028; P:GO:2000766; F:GO:0003729; F:GO:0003735	P:ribosomal small subunit assembly; P:negative regulation of cytoplasmic translation; F:mRNA binding; F:structural constituent of ribosome			Coil (COILS); IPR035104 (PRINTS); G3DSA:2.40.50.140 (GENE3D); IPR000110 (TIGRFAM); G3DSA:2.40.50.140 (GENE3D); IPR003029 (PFAM); G3DSA:2.40.50.140 (GENE3D); PTHR10724 (PANTHER); IPR035104 (PTHR10724:PANTHER); IPR035104 (PTHR10724:PANTHER); PTHR10724 (PANTHER); IPR003029 (PROSITE_PROFILES); IPR003029 (PROSITE_PROFILES); IPR003029 (PROSITE_PROFILES); IPR003029 (PROSITE_PROFILES); IPR003029 (PROSITE…	P:GO:0006412; F:GO:0003676; F:GO:0003723; F:GO:0003735; C:GO:0005840	P:translation; F:nucleic acid binding; F:RNA binding; F:structural constituent of ribosome; C:ribosome
WP_003113308.1	MULTISPECIES: muconate cycloisomerase I [Pseudomonas]	11	3	4	3	40	188	3	0	3	Yes	-1.13114	0.0858362		1.10887	0.0757112		1.58777	0.000282013	Up	6.28413	0.0179489	Higher	PA2509	catB	muconate cycloisomerase I	catB	1.04928	0.901328	M	P:GO:0009063; F:GO:0018849; F:GO:0018850; F:GO:0030145	P:cellular amino acid catabolic process; F:muconate cycloisomerase activity; F:chloromuconate cycloisomerase activity; F:manganese ion binding	EC:5.5.1.1; EC:5.5.1.7	Muconate cycloisomerase; Chloromuconate cycloisomerase	IPR013341 (PFAM); IPR029017 (G3DSA:3.30.390.GENE3D); IPR036849 (G3DSA:3.20.20.GENE3D); IPR013370 (TIGRFAM); IPR029065 (PFAM); IPR013370 (SFLD); SFLDS00001 (SFLD); PTHR48073 (PANTHER); PTHR48073:SF2 (PANTHER); IPR018110 (PROSITE_PATTERNS); IPR018110 (PROSITE_PATTERNS); IPR013370 (CDD); IPR036849 (SUPERFAMILY); IPR029017 (SUPERFAMILY)	P:GO:0009063; F:GO:0018849; F:GO:0018850; F:GO:0030145	P:cellular amino acid catabolic process; F:muconate cycloisomerase activity; F:chloromuconate cycloisomerase activity; F:manganese ion binding
WP_003094118.1	MULTISPECIES: cell division protein FtsQ [Pseudomonas]	20	5	12	5	32.2	322	5	0	5	Yes	1.0805	0.254782		1.70579	3.66272e-06	Up	1.58746	4.86439e-05	Up	1.32349	0.0240553		PA4409	ftsQ	cell division protein FtsQ	ftsQ	1.7344	4.95e-11	D	P:GO:0000917; P:GO:0043093; P:GO:1902410; F:GO:0042802; C:GO:0005887; C:GO:0032153	P:division septum assembly; P:FtsZ-dependent cytokinesis; P:mitotic cytokinetic process; F:identical protein binding; C:integral component of plasma membrane; C:cell division site			G3DSA:3.10.20.310 (GENE3D); IPR045335 (G3DSA:3.40.50.GENE3D); IPR013685 (PFAM); IPR005548 (PFAM); IPR026579 (PANTHER); IPR026579 (HAMAP); IPR034746 (PROSITE_PROFILES)	P:GO:0090529	P:cell septum assembly
WP_003102419.1	MULTISPECIES: cysteine synthase B [Pseudomonas]	52	11	38	11	32.4	1136	11	0	11	Yes	1.00844	0.578113		1.40717	1.90486e-05		1.5868	5.93339e-06	Up	-1.11573	0.00373225		PA0932	cysM	cysteine synthase B	cysM	-1.10619	0.211622	E	P:GO:0006535; F:GO:0004124; F:GO:0030170; F:GO:0080146; C:GO:0005737	P:cysteine biosynthetic process from serine; F:cysteine synthase activity; F:pyridoxal phosphate binding; F:L-cysteine desulfhydrase activity; C:cytoplasm	EC:2.5.1.47; EC:4.4.1.1	Cysteine synthase; Cystathionine gamma-lyase	Coil (COILS); IPR036052 (G3DSA:3.40.50.GENE3D); IPR005858 (TIGRFAM); IPR036052 (G3DSA:3.40.50.GENE3D); IPR001926 (PFAM); IPR005856 (TIGRFAM); IPR005858 (PTHR10314:PANTHER); PTHR10314 (PANTHER); IPR001216 (PROSITE_PATTERNS); cd01561 (CDD); IPR036052 (SUPERFAMILY)	P:GO:0006535; F:GO:0004124	P:cysteine biosynthetic process from serine; F:cysteine synthase activity
WP_003103876.1	MULTISPECIES: 30S ribosomal protein S10 [Bacteria]	55	6	52	6	11.8	852	6	0	6	Yes	0.998823	0.974403		-1.00771	0.851212		1.58576	4.44266e-06	Up	0.960984	0.475605		PA4264	rpsJ	30S ribosomal protein S10	rpsJ	1.91114	0.0264608	J	P:GO:0006355; P:GO:0006412; P:GO:0031564; F:GO:0000049; F:GO:0001072; F:GO:0003677; F:GO:0003735	P:regulation of transcription, DNA-templated; P:translation; P:transcription antitermination; F:tRNA binding; F:transcription antitermination factor activity, RNA binding; F:DNA binding; F:structural constituent of ribosome			IPR001848 (PRINTS); IPR001848 (TIGRFAM); IPR027486 (PFAM); IPR036838 (G3DSA:3.30.70.GENE3D); PTHR11700:SF9 (PANTHER); IPR001848 (PANTHER); IPR018268 (PROSITE_PATTERNS); IPR001848 (HAMAP); IPR036838 (SUPERFAMILY)	P:GO:0006412; F:GO:0003723; F:GO:0003735; C:GO:0005840	P:translation; F:RNA binding; F:structural constituent of ribosome; C:ribosome
WP_003090951.1	MULTISPECIES: transcription elongation factor GreB [Pseudomonas]	55	8	17	8	19.1	697	8	0	8	Yes	1.04468	0.441318		1.44481	0.000551652		1.58353	4.12127e-05	Up	0.853686	0.0691882		PA2859	greB	transcription elongation factor GreB	greB	-1.43117	0.00565116	K	P:GO:0006414; P:GO:0032784; F:GO:0003677; F:GO:0003746; F:GO:0070063	P:translational elongation; P:regulation of DNA-templated transcription, elongation; F:DNA binding; F:translation elongation factor activity; F:RNA polymerase binding			Coil (COILS); IPR036953 (G3DSA:3.10.50.GENE3D); IPR023459 (PIRSF); IPR022691 (PFAM); IPR001437 (PFAM); IPR036805 (G3DSA:1.10.287.GENE3D); IPR006358 (TIGRFAM); IPR023459 (PANTHER); PTHR30437:SF6 (PANTHER); IPR018151 (PROSITE_PATTERNS); IPR006358 (HAMAP); IPR028624 (HAMAP); IPR036805 (SUPERFAMILY); SSF54534 (SUPERFAMILY)	P:GO:0032784; F:GO:0003677; F:GO:0070063	P:regulation of DNA-templated transcription, elongation; F:DNA binding; F:RNA polymerase binding
WP_003083340.1	MULTISPECIES: GntR family transcriptional regulator [Pseudomonas]	37	8	25	8	28.6	915	8	0	8	Yes	0.998931	0.980005		1.18418	0.00756926		1.5822	4.1248e-05	Up	1.247	0.0547944		PA1520		probable transcriptional regulator	PA1520	1.20931	0.0629265	K	P:GO:0006355; F:GO:0003677; F:GO:0003700	P:regulation of transcription, DNA-templated; F:DNA binding; F:DNA-binding transcription factor activity			IPR036388 (G3DSA:1.10.10.GENE3D); IPR000524 (PFAM); IPR008920 (G3DSA:1.20.120.GENE3D); IPR011711 (PFAM); mobidb-lite (MOBIDB_LITE); PTHR43537 (PANTHER); PTHR43537:SF27 (PANTHER); IPR000524 (PROSITE_PROFILES); IPR000524 (CDD); IPR036390 (SUPERFAMILY); IPR008920 (SUPERFAMILY)	P:GO:0006355; F:GO:0003700	P:regulation of transcription, DNA-templated; F:DNA-binding transcription factor activity
WP_003092488.1	MULTISPECIES: hypothetical protein [Pseudomonas]	35	3	10	3	12.9	216	3	0	3	Yes	1.00247	0.941382		2.51392	7.01975e-06	Up	1.58125	0.0002729	Up	1.05661	0.454004		PA3688		hypothetical protein	PA3688	1.15199	0.135925	S					no IPS match	no IPS match	no IPS match
WP_003117314.1	hypothetical protein [Pseudomonas aeruginosa]	30	3	5	3	11.1	189	3	0	3	Yes	1.13155	0.066085		1.42451	0.00367854		1.57606	0.000344278	Up										S					IPR036390 (SUPERFAMILY)	no GO terms	no GO terms
WP_004365393.1	MULTISPECIES: spermidine synthase [Pseudomonas]	21	7	24	7	39.5	891	7	0	7	Yes	-1.06386	0.349527		1.38774	0.00386787		1.57114	0.00125077	Up	3.27889	0.00219448	Higher	PA4774	speE2	SpeE2	PA4774	1.49544	0.140818	E	P:GO:0008295; F:GO:0004766; F:GO:0010487; F:GO:0043919; C:GO:0005737	P:spermidine biosynthetic process; F:spermidine synthase activity; F:thermospermine synthase activity; F:agmatine aminopropyltransferase activity; C:cytoplasm	EC:2.5.1.104; EC:2.5.1.16; EC:2.5.1.79	N(1)-aminopropylagmatine synthase; Spermidine synthase; Thermospermine synthase	G3DSA:3.40.50.150 (GENE3D); PF01564 (PFAM); IPR037163 (G3DSA:2.30.140.GENE3D); IPR035246 (PFAM); PTHR43317:SF1 (PANTHER); PTHR43317 (PANTHER); IPR030373 (PROSITE_PATTERNS); IPR030374 (PROSITE_PROFILES); IPR001045 (HAMAP); cd02440 (CDD); IPR029063 (SUPERFAMILY)	F:GO:0003824	F:catalytic activity
WP_003085910.1	MULTISPECIES: hypothetical protein [Pseudomonas]	13	3	6	3	30.5	115	3	0	3	Yes	1.0563	0.140199		1.38075	0.00124169		1.56901	0.000334999	Up	0.825587	0.150761		PA0878		hypothetical protein	PA0878	1.25175	0.072378	S	F:GO:0019171	F:3-hydroxyacyl-[acyl-carrier-protein] dehydratase activity	EC:4.2.1.59	3-hydroxyacyl-[acyl-carrier-protein] dehydratase	G3DSA:3.10.129.10 (GENE3D); G3DSA:3.10.129.10 (GENE3D); IPR039569 (PFAM); PTHR28152:SF1 (PANTHER); PTHR28152 (PANTHER); IPR029069 (SUPERFAMILY); IPR029069 (SUPERFAMILY)	no GO terms	no GO terms
WP_110183971.1	histidinol-phosphate transaminase [Pseudomonas aeruginosa]	30	8	16	8	38.7	509	8	0	8	Yes	1.03359	0.364993		1.37907	0.000260697		1.5686	0.000185143	Up	-2.04066	2.51695e-06	Lower	PA4447	hisC1	histidinol-phosphate aminotransferase	hisC1	1.18342	0.288868	E	P:GO:0000105; F:GO:0004400; F:GO:0030170	P:histidine biosynthetic process; F:histidinol-phosphate transaminase activity; F:pyridoxal phosphate binding	EC:2.6.1.9	Histidinol-phosphate transaminase	IPR004839 (PFAM); IPR015421 (G3DSA:3.40.640.GENE3D); IPR015422 (G3DSA:3.90.1150.GENE3D); IPR005861 (TIGRFAM); PTHR42885:SF5 (PANTHER); PTHR42885 (PANTHER); IPR001917 (PROSITE_PATTERNS); IPR005861 (HAMAP); cd00609 (CDD); IPR015424 (SUPERFAMILY)	P:GO:0000105; P:GO:0009058; F:GO:0003824; F:GO:0004400; F:GO:0016740; F:GO:0030170	P:histidine biosynthetic process; P:biosynthetic process; F:catalytic activity; F:histidinol-phosphate transaminase activity; F:transferase activity; F:pyridoxal phosphate binding
WP_023465023.1	succinyldiaminopimelate transaminase [Pseudomonas aeruginosa]	19	7	17	7	44.5	439	7	0	7	Yes	1.05429	0.456078		1.4184	0.00636844		1.56567	0.00209481	Up	-1.5868	0.00181373	Lower	PA3659		probable aminotransferase	PA3659	-1.30154	0.130829	E	P:GO:0009089; F:GO:0009016; F:GO:0010285; F:GO:0030170	P:lysine biosynthetic process via diaminopimelate; F:succinyldiaminopimelate transaminase activity; F:L,L-diaminopimelate aminotransferase activity; F:pyridoxal phosphate binding	EC:2.6.1.83; EC:2.6.1.17	LL-diaminopimelate aminotransferase; Succinyldiaminopimelate transaminase	IPR015421 (G3DSA:3.40.640.GENE3D); IPR019878 (TIGRFAM); IPR004839 (PFAM); IPR015422 (G3DSA:3.90.1150.GENE3D); PTHR42832 (PANTHER); PTHR42832:SF3 (PANTHER); cd00609 (CDD); IPR015424 (SUPERFAMILY)	P:GO:0009058; P:GO:0009089; F:GO:0003824; F:GO:0009016; F:GO:0030170	P:biosynthetic process; P:lysine biosynthetic process via diaminopimelate; F:catalytic activity; F:succinyldiaminopimelate transaminase activity; F:pyridoxal phosphate binding
WP_003110588.1	MULTISPECIES: thymidylate synthase [Pseudomonas]	17	5	10	5	30	130	5	0	5	Yes	0.997125	0.965812		1.37668	0.00037235		1.56454	0.000302444	Up	-1.35112	0.000513734		PA0342	thyA	thymidylate synthase	thyA	-1.27069	6.24e-06	F	P:GO:0006231; P:GO:0006235; P:GO:0032259; F:GO:0004799; C:GO:0005829	P:dTMP biosynthetic process; P:dTTP biosynthetic process; P:methylation; F:thymidylate synthase activity; C:cytosol	EC:2.1.1.45	Thymidylate synthase	IPR000398 (PRINTS); IPR023451 (PFAM); IPR036926 (G3DSA:3.30.572.GENE3D); IPR000398 (TIGRFAM); IPR045097 (PANTHER); PTHR11548:SF9 (PANTHER); IPR020940 (PROSITE_PATTERNS); IPR000398 (HAMAP); IPR023451 (CDD); IPR036926 (SUPERFAMILY)	P:GO:0006231; F:GO:0004799; F:GO:0016741	P:dTMP biosynthetic process; F:thymidylate synthase activity; F:transferase activity, transferring one-carbon groups
WP_003098273.1	MULTISPECIES: RidA family protein [Pseudomonas]	31	4	8	4	13	212	4	0	4	Yes	1.1335	0.198837		1.55871	0.0983351		1.56407	0.011355	Up	1.05752	0.64271		PA5303		conserved hypothetical protein	PA5303	1.1378	0.181242	J	F:GO:0016787	F:hydrolase activity	EC:3	Hydrolases	IPR006175 (PFAM); IPR035959 (G3DSA:3.30.1330.GENE3D); IPR035709 (PANTHER); IPR035709 (CDD); IPR035959 (SUPERFAMILY)	no GO terms	no GO terms
WP_003110198.1	MULTISPECIES: aminodeoxychorismate lyase [Pseudomonas]	17	4	7	4	29.8	251	4	0	4	Yes	1.03594	0.149384		1.60781	9.61518e-06	Up	1.56196	2.114e-06	Up	-1.26239	0.00160996		PA2964	pabC	4-amino-4-deoxychorismate lyase	pabC	-1.06578	0.682216	EH	P:GO:0009082; P:GO:0046656; F:GO:0008696; F:GO:0030170; C:GO:0005829	P:branched-chain amino acid biosynthetic process; P:folic acid biosynthetic process; F:4-amino-4-deoxychorismate lyase activity; F:pyridoxal phosphate binding; C:cytosol	EC:4.1.3.38	Aminodeoxychorismate lyase	IPR043131 (G3DSA:3.30.470.GENE3D); IPR043132 (G3DSA:3.20.10.GENE3D); IPR001544 (PFAM); IPR017824 (TIGRFAM); PTHR42743 (PANTHER); PTHR42743:SF2 (PANTHER); IPR017824 (CDD); IPR036038 (SUPERFAMILY)	P:GO:0046656; F:GO:0003824; F:GO:0008696; F:GO:0030170	P:folic acid biosynthetic process; F:catalytic activity; F:4-amino-4-deoxychorismate lyase activity; F:pyridoxal phosphate binding
WP_003084587.1	MULTISPECIES: two-component system response regulator [Pseudomonas]	56	6	34	6	13.3	996	6	0	6	Yes	1.03825	0.707442		1.73763	0.000168726	Up	1.55759	0.00686508	Up	-1.36507	0.00623625		PA0409	pilH	twitching motility protein PilH	pilH	-1.00329	0.985083	KT	P:GO:0000160	P:phosphorelay signal transduction system			G3DSA:3.40.50.2300 (GENE3D); IPR001789 (PFAM); PTHR44591:SF6 (PANTHER); PTHR44591 (PANTHER); IPR001789 (PROSITE_PROFILES); IPR011006 (SUPERFAMILY)	P:GO:0000160	P:phosphorelay signal transduction system
WP_003114230.1	MULTISPECIES: threonine dehydratase [Pseudomonas]	9	2	3	2	34	42	2	0	2	Yes	1.03298	0.608898		1.37994	0.00837233		1.55617	0.00210331	Up	-3.08588	8.41414e-06	Lower	PA0851		hypothetical protein	PA0851	1.00966	0.929209	E	P:GO:0006565; P:GO:0006567; F:GO:0003941; F:GO:0004794; F:GO:0030170	P:L-serine catabolic process; P:threonine catabolic process; F:L-serine ammonia-lyase activity; F:L-threonine ammonia-lyase activity; F:pyridoxal phosphate binding	EC:4.3.1.17; EC:4.3.1.19	L-serine ammonia-lyase; Threonine ammonia-lyase	IPR036052 (G3DSA:3.40.50.GENE3D); IPR001926 (PFAM); IPR036052 (G3DSA:3.40.50.GENE3D); PTHR48078 (PANTHER); PTHR48078:SF7 (PANTHER); IPR000634 (PROSITE_PATTERNS); cd01562 (CDD); IPR036052 (SUPERFAMILY)	P:GO:0006520; F:GO:0030170	P:cellular amino acid metabolic process; F:pyridoxal phosphate binding
WP_003114812.1	MULTISPECIES: peptidylprolyl isomerase A [Pseudomonas]	43	6	24	6	20.1	786	6	0	6	Yes	-1.01138	0.860439		1.27347	0.0464252		1.55469	0.00864908	Up	-2.1986	2.81376e-05	Lower	PA3227	ppiA	peptidyl-prolyl cis-trans isomerase A	ppiA	1.27253	0.188079	M	P:GO:0000413; P:GO:0006457; F:GO:0003755; C:GO:0030288	P:protein peptidyl-prolyl isomerization; P:protein folding; F:peptidyl-prolyl cis-trans isomerase activity; C:outer membrane-bounded periplasmic space	EC:5.2.1.8	Peptidylprolyl isomerase	IPR002130 (PRINTS); IPR029000 (G3DSA:2.40.100.GENE3D); IPR002130 (PFAM); PTHR43246:SF11 (PANTHER); IPR044665 (PANTHER); IPR020892 (PROSITE_PATTERNS); IPR002130 (PROSITE_PROFILES); cd01920 (CDD); IPR029000 (SUPERFAMILY)	P:GO:0000413; P:GO:0006457; F:GO:0003755	P:protein peptidyl-prolyl isomerization; P:protein folding; F:peptidyl-prolyl cis-trans isomerase activity
WP_003102054.1	MULTISPECIES: hypothetical protein [Pseudomonas]	37	7	17	7	25.7	428	7	0	7	Yes	1.04969	0.355781		1.38416	9.95723e-05		1.55395	0.00136078	Up	1.57302	0.00269762	Higher	PA4963		hypothetical protein	PA4963	-1.1875	0.0401099	S					IPR005586 (PFAM); G3DSA:3.40.50.10610 (GENE3D); mobidb-lite (MOBIDB_LITE); PS51257 (PROSITE_PROFILES); SSF159594 (SUPERFAMILY)	no GO terms	no GO terms
WP_023097046.1	universal stress protein [Pseudomonas aeruginosa]	53	11	27	11	29.8	786	11	0	11	Yes	-1.06561	0.385053		1.52991	0.00170177	Up	1.55004	0.00113119	Up	1.16406	0.134936		PA5027		hypothetical protein	PA5027	1.17402	0.512338	T					IPR006015 (PRINTS); IPR014729 (G3DSA:3.40.50.GENE3D); IPR006016 (PFAM); IPR014729 (G3DSA:3.40.50.GENE3D); PTHR46268 (PANTHER); PTHR46268:SF14 (PANTHER); cd00293 (CDD); cd00293 (CDD); SSF52402 (SUPERFAMILY); SSF52402 (SUPERFAMILY)	no GO terms	no GO terms
WP_003113213.1	MULTISPECIES: bis(5'-nucleosyl)-tetraphosphatase (symmetrical) [Pseudomonas]	21	5	11	5	32	209	5	0	5	Yes	1.15205	0.419461		1.59296	0.0583173		1.54927	0.0734469		0.669615	0.0829725		PA0590	apaH	bis(5'-nucleosyl)-tetraphosphatase	apaH	1.20578	0.0889445	T	F:GO:0008803	F:bis(5'-nucleosyl)-tetraphosphatase (symmetrical) activity	EC:3.6.1.41; EC:3.6.1.9	Bis(5'-nucleosyl)-tetraphosphatase (symmetrical); Nucleotide diphosphatase	Coil (COILS); IPR029052 (G3DSA:3.60.21.GENE3D); IPR004617 (PIRSF); IPR004843 (PFAM); IPR004617 (TIGRFAM); PTHR42850 (PANTHER); PTHR42850:SF5 (PANTHER); IPR004617 (HAMAP); IPR004617 (CDD); IPR029052 (SUPERFAMILY)	F:GO:0008803; F:GO:0016787	F:bis(5'-nucleosyl)-tetraphosphatase (symmetrical) activity; F:hydrolase activity
WP_003090319.1	MULTISPECIES: copper resistance protein C [Proteobacteria]	31	3	9	3	13.3	262	3	0	3	Yes	-1.10022	0.158648		1.11149	0.484994		1.54906	0.0277121	Up										S	P:GO:0006825; P:GO:0046688; F:GO:0005507; C:GO:0042597	P:copper ion transport; P:response to copper ion; F:copper ion binding; C:periplasmic space			IPR014755 (G3DSA:2.60.40.GENE3D); IPR007348 (PFAM); IPR014756 (SUPERFAMILY)	P:GO:0046688; F:GO:0005507; C:GO:0042597	P:response to copper ion; F:copper ion binding; C:periplasmic space
WP_003122380.1	MULTISPECIES: glycine cleavage system aminomethyltransferase GcvT [Pseudomonas]	53	16	69	16	39.9	2505	16	0	16	Yes	1.00198	0.852197		1.32392	7.14187e-07		1.54843	8.93255e-08	Up	1.17446	0.0147962		PA2442	gcvT2	glycine cleavage system protein T2	gcvT2	1.83163	0.00559733	E	P:GO:0006546; P:GO:0032259; F:GO:0004047; F:GO:0005515; F:GO:0008483	P:glycine catabolic process; P:methylation; F:aminomethyltransferase activity; F:protein binding; F:transaminase activity	EC:2.6.1; EC:2.1.2.10; EC:2.1.1	Transferring nitrogenous groups; Aminomethyltransferase; Transferring one-carbon groups	IPR013977 (PFAM); IPR006222 (PFAM); IPR027266 (G3DSA:3.30.1360.GENE3D); G3DSA:3.30.70.1400 (GENE3D); G3DSA:2.40.30.110 (GENE3D); G3DSA:4.10.1250.10 (GENE3D); IPR006223 (TIGRFAM); PIRSF006487 (PIRSF); IPR028896 (PANTHER); PTHR43757:SF5 (PANTHER); SSF103025 (SUPERFAMILY); IPR029043 (SUPERFAMILY)	P:GO:0006546; F:GO:0004047; F:GO:0005515	P:glycine catabolic process; F:aminomethyltransferase activity; F:protein binding
WP_003090975.1	MULTISPECIES: orotidine-5'-phosphate decarboxylase [Pseudomonas]	50	7	26	7	24.4	710	7	0	7	Yes	-1.01427	0.594008		1.32576	0.000296758		1.54545	7.27172e-06	Up	1.0877	0.0894666		PA2876	pyrF	orotidine 5'-phosphate decarboxylase	pyrF	-1.41507	0.00575383	F	P:GO:0006207; P:GO:0015949; P:GO:0044205; F:GO:0004590; F:GO:0042802; C:GO:0005829	P:'de novo' pyrimidine nucleobase biosynthetic process; P:nucleobase-containing small molecule interconversion; P:'de novo' UMP biosynthetic process; F:orotidine-5'-phosphate decarboxylase activity; F:identical protein binding; C:cytosol	EC:4.1.1.23	Orotidine-5'-phosphate decarboxylase	IPR014732 (TIGRFAM); IPR001754 (PFAM); IPR013785 (G3DSA:3.20.20.GENE3D); PTHR32119 (PANTHER); IPR014732 (PTHR32119:PANTHER); IPR018089 (PROSITE_PATTERNS); IPR014732 (HAMAP); cd04725 (CDD); IPR011060 (SUPERFAMILY)	P:GO:0006207; P:GO:0044205; F:GO:0003824; F:GO:0004590	P:'de novo' pyrimidine nucleobase biosynthetic process; P:'de novo' UMP biosynthetic process; F:catalytic activity; F:orotidine-5'-phosphate decarboxylase activity
WP_003095244.1	MULTISPECIES: DNA-binding response regulator [Pseudomonas]	44	8	30	8	24.4	894	8	0	8	Yes	-1.03651	0.240437		1.16173	0.000472979		1.5447	2.78695e-06	Up	2.24237	1.07315e-06	Higher	PA4776	pmrA	PmrA: two-component regulator system response regulator PmrA	pmrA	1.48875	0.0953381	T	P:GO:0000160; P:GO:0006355; F:GO:0003677	P:phosphorelay signal transduction system; P:regulation of transcription, DNA-templated; F:DNA binding			G3DSA:6.10.250.690 (GENE3D); IPR001867 (PFAM); IPR001789 (PFAM); G3DSA:3.40.50.2300 (GENE3D); IPR036388 (G3DSA:1.10.10.GENE3D); PTHR48111:SF35 (PANTHER); IPR039420 (PANTHER); IPR001789 (PROSITE_PROFILES); IPR001867 (PROSITE_PROFILES); cd17624 (CDD); IPR001867 (CDD); IPR011006 (SUPERFAMILY); IPR016032 (SUPERFAMILY)	P:GO:0000160; P:GO:0006355; F:GO:0003677	P:phosphorelay signal transduction system; P:regulation of transcription, DNA-templated; F:DNA binding
WP_003101313.1	MULTISPECIES: amidase [Pseudomonas]	40	17	64	17	60.5	2195	17	0	17	Yes	1.01856	0.696803		1.52521	0.000102861	Up	1.54315	0.000129467	Up	-1.09094	0.0544726		PA4163		hypothetical protein	PA4163	1.25425	0.150632	J	F:GO:0004040; F:GO:0018750; F:GO:0043864; F:GO:0050537	F:amidase activity; F:biuret amidohydrolase activity; F:indoleacetamide hydrolase activity; F:mandelamide amidase activity	EC:3.5.1.84; EC:3.5.1.4; EC:3.5.1.86	Biuret amidohydrolase; Amidase; Mandelamide amidase	IPR036928 (G3DSA:3.90.1300.GENE3D); IPR023631 (PFAM); PTHR42678:SF11 (PANTHER); PTHR42678 (PANTHER); IPR036928 (SUPERFAMILY)	no GO terms	no GO terms
WP_003086441.1	MULTISPECIES: flagellar protein FliS [Pseudomonas]	24	3	9	3	14.2	323	3	0	3	Yes	1.05953	0.154348		1.60411	1.33079e-05	Up	1.54218	2.25783e-05	Up										N	P:GO:0044780; C:GO:0005829	P:bacterial-type flagellum assembly; C:cytosol			IPR003713 (PIRSF); IPR003713 (TIGRFAM); IPR003713 (PFAM); G3DSA:1.20.120.340 (GENE3D); IPR003713 (PANTHER); IPR003713 (CDD); IPR036584 (SUPERFAMILY)	P:GO:0044780	P:bacterial-type flagellum assembly
WP_003087237.1	MULTISPECIES: recombination protein RecR [Pseudomonas]	21	3	8	3	21.2	233	3	0	3	Yes	1.00996	0.801166		1.47659	0.000151154		1.54068	2.04155e-05	Up	-1.30588	0.000138553		PA1534	recR	recombination protein RecR	recR	-1.10997	0.567133	L	P:GO:0000731; P:GO:0006302; P:GO:0006310; P:GO:0009411; F:GO:0003677; F:GO:0046872	P:DNA synthesis involved in DNA repair; P:double-strand break repair; P:DNA recombination; P:response to UV; F:DNA binding; F:metal ion binding			IPR023628 (PFAM); IPR006171 (PFAM); IPR000093 (TIGRFAM); G3DSA:3.40.1360.10 (GENE3D); G3DSA:6.10.250.240 (GENE3D); G3DSA:1.10.8.420 (GENE3D); IPR000093 (PANTHER); IPR015967 (PROSITE_PATTERNS); IPR006171 (PROSITE_PROFILES); IPR000093 (HAMAP); IPR034137 (CDD); IPR023627 (SUPERFAMILY)	P:GO:0006281; P:GO:0006310; F:GO:0003677	P:DNA repair; P:DNA recombination; F:DNA binding
WP_003096602.1	MULTISPECIES: DNA-directed RNA polymerase subunit omega [Pseudomonas]	39	3	13	3	9.8	220	3	0	3	Yes	1.06459	0.825262		1.29266	0.316341		1.53828	0.0920369		0.744214	0.0849269		PA5337	rpoZ	RNA polymerase omega subunit	rpoZ	-1.02698	0.789062	K	P:GO:0006351; F:GO:0003677; F:GO:0003899; C:GO:0005618; C:GO:0005829; C:GO:0030880	P:transcription, DNA-templated; F:DNA binding; F:DNA-directed 5'-3' RNA polymerase activity; C:cell wall; C:cytosol; C:RNA polymerase complex	EC:2.7.7.6	DNA-directed RNA polymerase	IPR003716 (TIGRFAM); IPR036161 (G3DSA:3.90.940.GENE3D); IPR006110 (PFAM); IPR003716 (PANTHER); IPR003716 (HAMAP); IPR036161 (SUPERFAMILY)	P:GO:0006351; F:GO:0003677; F:GO:0003899	P:transcription, DNA-templated; F:DNA binding; F:DNA-directed 5'-3' RNA polymerase activity
WP_003093248.1	MULTISPECIES: inorganic pyrophosphatase [Pseudomonas]	37	5	26	5	19.4	766	5	0	5	Yes	1.07722	0.53224		1.34937	0.112391		1.53766	0.0319096	Up	0.919139	0.504707		PA4031	ppa	inorganic pyrophosphatase	ppa	1.20629	0.22865	C	P:GO:0006796; F:GO:0000287; F:GO:0004427; C:GO:0005615; C:GO:0005829	P:phosphate-containing compound metabolic process; F:magnesium ion binding; F:inorganic diphosphatase activity; C:extracellular space; C:cytosol	EC:3.6.1.1	Inorganic diphosphatase	IPR008162 (PFAM); IPR036649 (G3DSA:3.90.80.GENE3D); PTHR10286:SF0 (PANTHER); IPR008162 (PANTHER); PS00387 (PROSITE_PATTERNS); IPR008162 (HAMAP); IPR008162 (CDD); IPR036649 (SUPERFAMILY)	P:GO:0006796; F:GO:0000287; F:GO:0004427; C:GO:0005737	P:phosphate-containing compound metabolic process; F:magnesium ion binding; F:inorganic diphosphatase activity; C:cytoplasm
WP_003096098.1	MULTISPECIES: adenine DNA glycosylase [Pseudomonas]	16	6	12	6	39.3	326	6	0	6	Yes	-1.09698	0.046638		-1.16462	0.00195368		1.53713	1.7508e-06	Up	1.87933	0.00090373	Higher	PA5147	mutY	A / G specific adenine glycosylase	mutY	1.32186	0.0716651	L	P:GO:0006284; F:GO:0003677; F:GO:0019104; F:GO:0046872; F:GO:0051539	P:base-excision repair; F:DNA binding; F:DNA N-glycosylase activity; F:metal ion binding; F:4 iron, 4 sulfur cluster binding	EC:3.2.2	Glycosylases	G3DSA:3.90.79.10 (GENE3D); IPR005760 (TIGRFAM); IPR029119 (PFAM); IPR000445 (PFAM); G3DSA:1.10.340.30 (GENE3D); IPR003265 (PFAM); IPR023170 (G3DSA:1.10.1670.GENE3D); IPR044298 (PANTHER); IPR004036 (PROSITE_PATTERNS); IPR029119 (CDD); IPR003265 (CDD); IPR015797 (SUPERFAMILY); IPR011257 (SUPERFAMILY)	P:GO:0006281; P:GO:0006284; F:GO:0003677; F:GO:0003824; F:GO:0016798; F:GO:0019104	P:DNA repair; P:base-excision repair; F:DNA binding; F:catalytic activity; F:hydrolase activity, acting on glycosyl bonds; F:DNA N-glycosylase activity
WP_003094724.1	MULTISPECIES: 4-hydroxy-3-methylbut-2-enyl diphosphate reductase [Pseudomonas]	46	12	31	12	34.7	673	12	0	12	Yes	-1.0098	0.621614		1.16046	0.000121412		1.53506	1.8679e-06	Up	1.13777	0.00153192		PA4557	lytB	LytB protein	lytB	1.20664	0.205807	IM	P:GO:0016114; P:GO:0019288; P:GO:0050992; F:GO:0042380; F:GO:0046872; F:GO:0051538; F:GO:0051539; F:GO:0051745; C:GO:0005829	P:terpenoid biosynthetic process; P:isopentenyl diphosphate biosynthetic process, methylerythritol 4-phosphate pathway; P:dimethylallyl diphosphate biosynthetic process; F:hydroxymethylbutenyl pyrophosphate reductase activity; F:metal ion binding; F:3 iron, 4 sulfur cluster binding; F:4 iron, 4 sulfur cluster binding; F:4-hydroxy-3-methylbut-2-en-1-yl diphosphate reductase activity; C:cytosol	EC:1.17.1; EC:1.17.7.4	Acting on CH or CH(2) groups; 4-hydroxy-3-methylbut-2-enyl diphosphate reductase	IPR003451 (TIGRFAM); IPR003451 (PFAM); G3DSA:3.40.1010.20 (GENE3D); G3DSA:3.40.50.11270 (GENE3D); G3DSA:3.40.1010.20 (GENE3D); IPR003451 (PANTHER); IPR003451 (HAMAP); IPR003451 (CDD)	P:GO:0019288; P:GO:0050992; F:GO:0046872; F:GO:0051745	P:isopentenyl diphosphate biosynthetic process, methylerythritol 4-phosphate pathway; P:dimethylallyl diphosphate biosynthetic process; F:metal ion binding; F:4-hydroxy-3-methylbut-2-en-1-yl diphosphate reductase activity
WP_003093701.1	MULTISPECIES: 30S ribosomal protein S14 [Pseudomonas]	40	4	28	4	11.6	851	4	0	4	Yes	-1.03469	0.448772		1.00282	0.995961		1.53391	2.9737e-05	Up	1.11406	0.020913		PA4250	rpsN	30S ribosomal protein S14	rpsN	2.5924	0.0157036	J	P:GO:0000028; P:GO:0006412; F:GO:0003735; F:GO:0019843; C:GO:0005618	P:ribosomal small subunit assembly; P:translation; F:structural constituent of ribosome; F:rRNA binding; C:cell wall			Coil (COILS); IPR001209 (PFAM); G3DSA:1.10.287.1480 (GENE3D); IPR001209 (PANTHER); PTHR19836:SF23 (PANTHER); IPR018271 (PROSITE_PATTERNS); IPR023036 (HAMAP); SSF57716 (SUPERFAMILY)	P:GO:0006412; F:GO:0003735; C:GO:0005840	P:translation; F:structural constituent of ribosome; C:ribosome
WP_017002003.1	MULTISPECIES: DNA topoisomerase IV subunit B [Pseudomonas]	14	4	7	4	36.5	441	4	0	4	Yes	-1.08618	0.155223		1.38234	0.000573293		1.53209	0.000210043	Up	1.16169	0.121101		PA4966		hypothetical protein	PA4966	1.2097	0.28205	S	F:GO:0016853	F:isomerase activity	EC:5	Isomerases	IPR027372 (PFAM); mobidb-lite (MOBIDB_LITE); SSF101898 (SUPERFAMILY)	no GO terms	no GO terms
WP_110183957.1	ATP-dependent DNA helicase DinG [Pseudomonas aeruginosa]	18	14	29	13	78.8	433	14	0	13	Yes	1.00318	0.912303		1.10911	0.027409		1.53099	1.58019e-05	Up	1.29938	0.0156944		PA1045		hypothetical protein	PA1045	-1.42084	0.00125348	KL	P:GO:0006139; P:GO:0032508; F:GO:0003677; F:GO:0003678; F:GO:0005524; F:GO:0016818; F:GO:0046872; F:GO:0051539	P:nucleobase-containing compound metabolic process; P:DNA duplex unwinding; F:DNA binding; F:DNA helicase activity; F:ATP binding; F:hydrolase activity, acting on acid anhydrides, in phosphorus-containing anhydrides; F:metal ion binding; F:4 iron, 4 sulfur cluster binding	EC:3.6.1; EC:3.6.4.12	Acting on acid anhydrides; DNA helicase	IPR027417 (G3DSA:3.40.50.GENE3D); IPR006555 (PFAM); IPR027417 (G3DSA:3.40.50.GENE3D); IPR045028 (PANTHER); PTHR11472:SF59 (PANTHER); IPR014013 (PROSITE_PROFILES); IPR039000 (HAMAP); IPR027417 (SUPERFAMILY)	P:GO:0006139; F:GO:0003676; F:GO:0003678; F:GO:0004386; F:GO:0005524; F:GO:0016818	P:nucleobase-containing compound metabolic process; F:nucleic acid binding; F:DNA helicase activity; F:helicase activity; F:ATP binding; F:hydrolase activity, acting on acid anhydrides, in phosphorus-containing anhydrides
WP_003092248.1	MULTISPECIES: hypothetical protein [Pseudomonas]	55	6	21	6	15	866	6	0	6	Yes	-1.01302	0.768782		1.28987	0.0249266		1.53015	0.00577639	Up	-1.51699	0.000179929	Lower	PA3611		hypothetical protein	PA3611	1.03982	0.765325	S					IPR025203 (PFAM); G3DSA:3.30.300.250 (GENE3D)	no GO terms	no GO terms
WP_003083666.1	MULTISPECIES: type VI secretion system contractile sheath small subunit [Pseudomonas]	25	4	9	4	18.8	269	4	0	4	Yes	1.04381	0.467378		1.38664	0.00550573		1.53012	0.000937688	Up	-17.0504	1.72497e-07	Lower	PA0083	tssB1	TssB1	PA0083	3.51261	2.64e-06	S					IPR008312 (PFAM); IPR008312 (PIRSF); IPR008312 (TIGRFAM); PTHR35850:SF1 (PANTHER); IPR008312 (PANTHER)	no GO terms	no GO terms
WP_023464698.1	putative hydro-lyase [Pseudomonas aeruginosa]	49	10	51	10	29.1	875	10	0	10	Yes	1.05117	0.588032		1.15771	0.0282104		1.52804	0.00026319	Up				PA2116		conserved hypothetical protein	PA2116	1.56204	0.000366653	S	F:GO:0016829	F:lyase activity	EC:4	Lyases	G3DSA:3.40.1640.10 (GENE3D); IPR016938 (PIRSF); G3DSA:3.30.2040.10 (GENE3D); IPR009906 (PFAM); PTHR32022 (PANTHER); IPR016938 (HAMAP); IPR038021 (SUPERFAMILY)	no GO terms	no GO terms
WP_003112328.1	MULTISPECIES: methyl-accepting chemotaxis protein CtpL [Pseudomonas]	32	17	38	15	70.7	1363	17	1	16	Yes	-1.03062	0.495133		1.09219	0.0177731		1.52802	1.87224e-06	Up	-1.4098	3.57182e-05		PA4844	ctpL	CtpL	PA4844	-1.14192	0.521717	NT	P:GO:0007165; P:GO:0010247; P:GO:0050918; F:GO:0004888; C:GO:0005886; C:GO:0016021	P:signal transduction; P:detection of phosphate ion; P:positive chemotaxis; F:transmembrane signaling receptor activity; C:plasma membrane; C:integral component of membrane			Coil (COILS); Coil (COILS); Coil (COILS); IPR004090 (PRINTS); IPR004089 (PFAM); G3DSA:1.10.287.950 (GENE3D); PTHR32089 (PANTHER); PTHR32089:SF109 (PANTHER); IPR004089 (PROSITE_PROFILES); IPR003660 (PROSITE_PROFILES); cd11386 (CDD); SSF58104 (SUPERFAMILY)	P:GO:0006935; P:GO:0007165; F:GO:0004888; C:GO:0016020; C:GO:0016021	P:chemotaxis; P:signal transduction; F:transmembrane signaling receptor activity; C:membrane; C:integral component of membrane
WP_003082372.1	MULTISPECIES: cold-shock protein [Pseudomonas]	64	5	36	5	7.7	740	5	0	5	Yes	1.02184	0.809703		1.62313	0.00545006	Up	1.52677	0.0505365	Up	-1.32377	0.0396128		PA1159		probable cold-shock protein	PA1159	-1.01887	0.863562	K	F:GO:0003677; C:GO:0005737	F:DNA binding; C:cytoplasm			IPR002059 (PRINTS); IPR002059 (PFAM); G3DSA:2.40.50.140 (GENE3D); IPR012156 (PIRSF); PTHR11544:SF126 (PANTHER); PTHR11544 (PANTHER); IPR019844 (PROSITE_PATTERNS); IPR002059 (PROSITE_PROFILES); IPR002059 (CDD); IPR012340 (SUPERFAMILY)	F:GO:0003676	F:nucleic acid binding
WP_110184033.1	cytochrome b [Pseudomonas aeruginosa]	14	2	3	2	19.1	111	2	0	2	Yes	-1.06566	0.501188		1.20978	0.0477507		1.52587	0.00225753	Up				PA3575		hypothetical protein	PA3575	1.04706	0.699321	C	P:GO:0022904; F:GO:0009055; C:GO:0016021	P:respiratory electron transport chain; F:electron transfer activity; C:integral component of membrane	EC:1	Oxidoreductases	IPR011577 (PFAM); PTHR30529:SF7 (PANTHER); PTHR30529 (PANTHER); IPR016174 (SUPERFAMILY)	P:GO:0022904; F:GO:0009055; C:GO:0016020; C:GO:0016021	P:respiratory electron transport chain; F:electron transfer activity; C:membrane; C:integral component of membrane
WP_004348584.1	MULTISPECIES: methyltransferase domain-containing protein [Pseudomonas]	10	3	7	3	40.8	256	3	0	3	Yes	1.02278	0.688695		1.34869	0.00300969		1.5255	0.000653585	Up										H	P:GO:0032259; F:GO:0008168	P:methylation; F:methyltransferase activity	EC:2.1.1	Transferring one-carbon groups	PF13489 (PFAM); G3DSA:3.40.50.150 (GENE3D); cd02440 (CDD); IPR029063 (SUPERFAMILY)	no GO terms	no GO terms
WP_003090460.1	MULTISPECIES: NADH-quinone oxidoreductase subunit E [Pseudomonas]	37	5	15	5	18.1	568	5	0	5	Yes	1.02267	0.652255		1.28235	0.0105483		1.52479	0.00324686	Up	-1.29565	0.00476947		PA2640	nuoE	NADH dehydrogenase I chain E	nuoE	1.24306	0.11415	C	P:GO:0022904; F:GO:0046872; F:GO:0048038; F:GO:0050136; F:GO:0051537; C:GO:0045272	P:respiratory electron transport chain; F:metal ion binding; F:quinone binding; F:NADH dehydrogenase (quinone) activity; F:2 iron, 2 sulfur cluster binding; C:plasma membrane respiratory chain complex I	EC:1.6.5.11; EC:1.6.5.2	NADH dehydrogenase (quinone); NAD(P)H dehydrogenase (quinone)	IPR002023 (PIRSF); G3DSA:3.40.30.10 (GENE3D); IPR002023 (TIGRFAM); IPR041921 (G3DSA:1.10.10.GENE3D); PF01257 (PFAM); PTHR10371 (PANTHER); IPR002023 (PROSITE_PATTERNS); IPR042128 (CDD); IPR036249 (SUPERFAMILY)	F:GO:0016491	F:oxidoreductase activity
WP_023465004.1	electron transport complex subunit RsxC [Pseudomonas aeruginosa]	6	5	8	5	82.4	238	5	0	5	Yes	-1.12612	0.28619		1.49907	8.29951e-05	Up	1.52408	0.000327588	Up	0.799277	0.319746		PA3491		probable ferredoxin	PA3491	1.10372	0.417857	C	P:GO:0022900; F:GO:0009055; F:GO:0046872; F:GO:0051539; C:GO:0005886	P:electron transport chain; F:electron transfer activity; F:metal ion binding; F:4 iron, 4 sulfur cluster binding; C:plasma membrane	EC:1	Oxidoreductases	Coil (COILS); Coil (COILS); Coil (COILS); Coil (COILS); Coil (COILS); Coil (COILS); Coil (COILS); IPR037225 (G3DSA:3.40.50.GENE3D); IPR011538 (PFAM); G3DSA:3.30.70.20 (GENE3D); IPR019554 (PFAM); IPR026902 (PFAM); IPR010208 (TIGRFAM); IPR017896 (PFAM); mobidb-lite (MOBIDB_LITE); mobidb-lite (MOBIDB_LITE); IPR010208 (PANTHER); IPR017900 (PROSITE_PATTERNS); IPR017896 (PROSITE_PROFILES); IPR017896 (P…	F:GO:0009055; F:GO:0051539; C:GO:0016020	F:electron transfer activity; F:4 iron, 4 sulfur cluster binding; C:membrane
WP_003083692.1	MULTISPECIES: DUF1795 domain-containing protein [Pseudomonas]	26	4	6	4	16.5	188	4	0	4	Yes	1.01263	0.893438		1.55907	0.000800607	Up	1.52369	0.000964645	Up	-7.90524	6.74786e-08	Lower	PA0094	eagT6	EagT6	PA0094	1.27048	0.174965	S					IPR014894 (PFAM); G3DSA:3.40.1000.10 (GENE3D); IPR016123 (SUPERFAMILY)	no GO terms	no GO terms
WP_003119136.1	MULTISPECIES: coenzyme PQQ synthesis protein E [Pseudomonas]	12	4	4	4	42.5	126	4	0	4	Yes	1.04572	0.750866		1.17838	0.109812		1.52357	0.00202802	Up	0.93041	0.636732		PA1989	pqqE	pyrroloquinoline quinone biosynthesis protein E	pqqE	1.38082	0.0130298	H	P:GO:0018189; F:GO:0005506; F:GO:0009975; F:GO:0016491; F:GO:0016829; F:GO:0051539; F:GO:1904047	P:pyrroloquinoline quinone biosynthetic process; F:iron ion binding; F:cyclase activity; F:oxidoreductase activity; F:lyase activity; F:4 iron, 4 sulfur cluster binding; F:S-adenosyl-L-methionine binding	EC:1; EC:4	Oxidoreductases; Lyases	IPR007197 (PFAM); PF13394 (PFAM); IPR023885 (PFAM); IPR011843 (TIGRFAM); IPR023885 (TIGRFAM); IPR017200 (PIRSF); IPR013785 (G3DSA:3.20.20.GENE3D); IPR011843 (SFLD); IPR007197 (SFLD); PTHR11228 (PANTHER); PTHR11228:SF7 (PANTHER); IPR000385 (PROSITE_PATTERNS); IPR007197 (PROSITE_PROFILES); IPR011843 (HAMAP); cd01335 (CDD); SSF102114 (SUPERFAMILY)	P:GO:0018189; F:GO:0003824; F:GO:0046872; F:GO:0051536; F:GO:0051539	P:pyrroloquinoline quinone biosynthetic process; F:catalytic activity; F:metal ion binding; F:iron-sulfur cluster binding; F:4 iron, 4 sulfur cluster binding
WP_003093308.1	MULTISPECIES: N utilization substance protein B [Pseudomonas]	45	6	15	6	17.7	320	6	0	6	Yes	1.03107	0.604556		1.44555	0.000414206		1.52306	4.90251e-05	Up	-1.33857	0.00184869		PA4052	nusB	NusB protein	nusB	-1.19855	0.0880963	K	P:GO:0006355; P:GO:0031564; F:GO:0003723; C:GO:0005829	P:regulation of transcription, DNA-templated; P:transcription antitermination; F:RNA binding; C:cytosol			IPR035926 (G3DSA:1.10.940.GENE3D); IPR011605 (TIGRFAM); IPR006027 (PFAM); mobidb-lite (MOBIDB_LITE); IPR011605 (PANTHER); IPR011605 (HAMAP); cd00619 (CDD); IPR035926 (SUPERFAMILY)	P:GO:0006353; P:GO:0006355; F:GO:0003723	P:DNA-templated transcription, termination; P:regulation of transcription, DNA-templated; F:RNA binding
WP_003093748.1	MULTISPECIES: 50S ribosomal protein L10 [Pseudomonas]	43	6	58	6	17.6	1709	6	0	6	Yes	1.03783	0.0104268		1.26095	0.00172485		1.51921	9.62255e-07	Up	-1.20137	0.00142685		PA4272	rplJ	50S ribosomal protein L10	rplJ	2.64679	0.00717891	J	P:GO:0017148; P:GO:0042254; F:GO:0003735; F:GO:0043022; F:GO:0070180; C:GO:0005618; C:GO:0005886	P:negative regulation of translation; P:ribosome biogenesis; F:structural constituent of ribosome; F:ribosome binding; F:large ribosomal subunit rRNA binding; C:cell wall; C:plasma membrane			IPR043141 (G3DSA:3.30.70.GENE3D); IPR001790 (PFAM); G3DSA:6.10.250.2350 (GENE3D); IPR001790 (PANTHER); PTHR11560:SF8 (PANTHER); IPR002363 (PROSITE_PATTERNS); IPR022973 (HAMAP); IPR001790 (CDD); IPR043141 (SUPERFAMILY)	P:GO:0006412; F:GO:0003735; C:GO:0015934	P:translation; F:structural constituent of ribosome; C:large ribosomal subunit
WP_003092811.1	MULTISPECIES: nucleoside-diphosphate kinase [Proteobacteria]	71	8	70	8	15.6	1921	8	0	8	Yes	-1.01985	0.49237		1.42197	2.1424e-05		1.51864	2.36734e-06	Up	-1.21181	0.000740804		PA3807	ndk	nucleoside diphosphate kinase	ndk	1.27913	0.125806	F	P:GO:0006165; P:GO:0006183; P:GO:0006228; P:GO:0006241; P:GO:0042121; P:GO:0090305; F:GO:0004519; F:GO:0004550; F:GO:0005524; F:GO:0046872; C:GO:0005829	P:nucleoside diphosphate phosphorylation; P:GTP biosynthetic process; P:UTP biosynthetic process; P:CTP biosynthetic process; P:alginic acid biosynthetic process; P:nucleic acid phosphodiester bond hydrolysis; F:endonuclease activity; F:nucleoside diphosphate kinase activity; F:ATP binding; F:metal ion binding; C:cytosol	EC:3.1; EC:2.7.4.6	Acting on ester bonds; Nucleoside-diphosphate kinase	IPR001564 (PRINTS); IPR034907 (PFAM); IPR036850 (G3DSA:3.30.70.GENE3D); PTHR11349:SF101 (PANTHER); PTHR11349 (PANTHER); IPR023005 (PROSITE_PATTERNS); IPR001564 (HAMAP); cd04413 (CDD); IPR036850 (SUPERFAMILY)	P:GO:0006165; P:GO:0006183; P:GO:0006228; P:GO:0006241; F:GO:0004550	P:nucleoside diphosphate phosphorylation; P:GTP biosynthetic process; P:UTP biosynthetic process; P:CTP biosynthetic process; F:nucleoside diphosphate kinase activity
WP_003102243.1	MULTISPECIES: hypothetical protein [Pseudomonas]	42	3	6	3	8.7	323	3	0	3	Yes	-1.02693	0.695055		1.14059	0.178115		1.51693	3.00638e-05	Up	1.90308	0.00534313	Higher	PA4782		hypothetical protein	PA4782	1.22671	0.252795						mobidb-lite (MOBIDB_LITE); mobidb-lite (MOBIDB_LITE); PS51257 (PROSITE_PROFILES)	no GO terms	no GO terms
WP_003096441.1	MULTISPECIES: YjbQ family protein [Pseudomonas]	21	2	4	2	15.9	123	2	0	2	Yes	-1.0524	0.409653		1.25063	0.0128779		1.51435	0.00232693	Up	-2.55696	1.78119e-05	Lower	PA5286		conserved hypothetical protein	PA5286	-1.06617	0.493167	S					IPR001602 (PIRSF); IPR001602 (PFAM); IPR001602 (TIGRFAM); IPR035917 (G3DSA:2.60.120.GENE3D); IPR001602 (PANTHER); IPR035917 (SUPERFAMILY)	no GO terms	no GO terms
WP_003117340.1	MULTISPECIES: hydroxymethylglutaryl-CoA lyase [Pseudomonas]	46	12	43	12	31.8	1485	12	0	12	Yes	1.05747	0.062225		1.26717	0.000876601		1.51304	8.25335e-05	Up	1.19218	0.0506376		PA2011	liuE	3-hydroxy-3-methylglutaryl-CoA lyase	liuE	1.05241	0.726921	E	P:GO:0006552; P:GO:0046247; P:GO:0046951; F:GO:0004419; F:GO:0046872; F:GO:0047445	P:leucine catabolic process; P:terpene catabolic process; P:ketone body biosynthetic process; F:hydroxymethylglutaryl-CoA lyase activity; F:metal ion binding; F:3-hydroxy-3-isohexenylglutaryl-CoA lyase activity	EC:4.1.3.4; EC:4.1.3.26	Hydroxymethylglutaryl-CoA lyase; 3-hydroxy-3-isohexenylglutaryl-CoA lyase	IPR000891 (PFAM); IPR013785 (G3DSA:3.20.20.GENE3D); IPR043594 (PANTHER); IPR000138 (PROSITE_PATTERNS); IPR000891 (PROSITE_PROFILES); cd07938 (CDD); SSF51569 (SUPERFAMILY)	F:GO:0003824; F:GO:0004419; F:GO:0016833	F:catalytic activity; F:hydroxymethylglutaryl-CoA lyase activity; F:oxo-acid-lyase activity
WP_003092845.1	MULTISPECIES: inositol monophosphatase [Pseudomonas]	47	12	30	12	29.5	927	12	0	12	Yes	1.08952	0.268585		1.21079	0.0997132		1.5127	0.00312063	Up	-1.33238	0.00132886		PA3818		extragenic suppressor protein SuhB	PA3818	-2.14436	5.69e-07	G	P:GO:0006020; P:GO:0007165; P:GO:0046854; P:GO:0046855; F:GO:0000287; F:GO:0008934; F:GO:0031403; F:GO:0047954; F:GO:0052832; F:GO:0052833; C:GO:0005829	P:inositol metabolic process; P:signal transduction; P:phosphatidylinositol phosphate biosynthetic process; P:inositol phosphate dephosphorylation; F:magnesium ion binding; F:inositol monophosphate 1-phosphatase activity; F:lithium ion binding; F:glycerol-2-phosphatase activity; F:inositol monophosphate 3-phosphatase activity; F:inositol monophosphate 4-phosphatase activity; C:cytosol	EC:3.1.3.19; EC:3.1.3.25	Glycerol-2-phosphatase; Inositol-phosphate phosphatase	IPR022337 (PRINTS); IPR000760 (PRINTS); G3DSA:3.30.540.10 (GENE3D); G3DSA:3.40.190.80 (GENE3D); IPR000760 (PFAM); PTHR20854:SF42 (PANTHER); PTHR20854 (PANTHER); IPR020583 (PROSITE_PATTERNS); IPR020550 (PROSITE_PATTERNS); IPR033942 (CDD); SSF56655 (SUPERFAMILY)	P:GO:0046854; P:GO:0046855; F:GO:0008934	P:phosphatidylinositol phosphate biosynthetic process; P:inositol phosphate dephosphorylation; F:inositol monophosphate 1-phosphatase activity
WP_015649754.1	MULTISPECIES: hypothetical protein [Pseudomonas]	17	7	19	7	56.1	676	7	0	7	Yes	1.00485	0.895518		1.48289	9.59549e-05		1.51226	5.63244e-05	Up	2.54701	0.0122348	Higher	PA0435		hypothetical protein	PA0435	2.37543	0.00818267	S	C:GO:0016021	C:integral component of membrane			IPR005625 (PFAM); IPR005625 (PANTHER); PTHR34219:SF6 (PANTHER)	no GO terms	no GO terms
WP_003111119.1	MULTISPECIES: N-carbamoylputrescine amidase [Pseudomonas]	24	5	10	5	32.7	310	5	0	5	Yes	-1.02618	0.423725		1.28916	0.000470263		1.51166	6.06253e-05	Up	1.31922	0.00100475		PA0293	aguB	N-carbamoylputrescine amidohydrolase	aguB	1.16837	0.265552	S	P:GO:0033388; F:GO:0047417; F:GO:0050126	P:putrescine biosynthetic process from arginine; F:N-carbamoyl-D-amino acid hydrolase activity; F:N-carbamoylputrescine amidase activity	EC:3.5.1.53; EC:3.5.1.77	N-carbamoylputrescine amidase; N-carbamoyl-D-amino-acid hydrolase	IPR017755 (TIGRFAM); IPR036526 (G3DSA:3.60.110.GENE3D); IPR003010 (PFAM); PTHR43674 (PANTHER); PTHR43674:SF6 (PANTHER); IPR003010 (PROSITE_PROFILES); cd07573 (CDD); IPR036526 (SUPERFAMILY)	P:GO:0006596; P:GO:0006807; F:GO:0050126	P:polyamine biosynthetic process; P:nitrogen compound metabolic process; F:N-carbamoylputrescine amidase activity
WP_003082592.1	MULTISPECIES: 5,6-dimethylbenzimidazole synthase [Pseudomonas]	16	3	5	3	24	132	3	0	3	Yes	1.06549	0.510997		1.23379	0.0747599		1.50982	0.00297887	Up	-1.24754	0.0185049		PA1274		conserved hypothetical protein	PA1274	1.56149	0.065294	C	F:GO:0016874; F:GO:0102919	F:ligase activity; F:5,6-dimethylbenzimidazole synthase activity	EC:1.13.11.79; EC:6	Aerobic 5,6-dimethylbenzimidazole synthase; Ligases	IPR012825 (TIGRFAM); IPR029479 (PFAM); IPR000415 (G3DSA:3.40.109.GENE3D); PTHR23026 (PANTHER); IPR000415 (SUPERFAMILY)	F:GO:0016491	F:oxidoreductase activity
WP_003093938.1	MULTISPECIES: fumarate hydratase [Pseudomonas]	35	15	62	15	54.7	1540	15	0	15	Yes	-1.04566	0.00741077		-1.01572	0.544495		1.50967	1.80299e-07	Up	1.04416	0.0504729		PA4333		probable fumarase	PA4333	1.13463	0.444093	C	P:GO:0006091; F:GO:0004333; F:GO:0046872; F:GO:0051539	P:generation of precursor metabolites and energy; F:fumarate hydratase activity; F:metal ion binding; F:4 iron, 4 sulfur cluster binding	EC:4.2.1.2	Fumarate hydratase	IPR004646 (PFAM); IPR036660 (G3DSA:3.20.130.GENE3D); IPR004647 (PFAM); IPR004647 (TIGRFAM); IPR004646 (TIGRFAM); IPR011167 (PIRSF); PTHR30389:SF1 (PANTHER); PTHR30389 (PANTHER); IPR036660 (SUPERFAMILY)	P:GO:0006091; F:GO:0004333; F:GO:0016829; F:GO:0016836	P:generation of precursor metabolites and energy; F:fumarate hydratase activity; F:lyase activity; F:hydro-lyase activity
WP_110183981.1	30S ribosome-binding factor RbfA [Pseudomonas aeruginosa]	57	7	19	7	14.5	695	7	0	7	Yes	1.06046	0.552827		1.1691	0.00821168		1.50964	0.000514604	Up	-1.35864	0.000423116		PA4743	rbfA	ribosome-binding factor A	rbfA	1.00982	0.96195	J	P:GO:0006974; P:GO:0009409; P:GO:0030490; F:GO:0043024; C:GO:0005829	P:cellular response to DNA damage stimulus; P:response to cold; P:maturation of SSU-rRNA; F:ribosomal small subunit binding; C:cytosol			IPR015946 (G3DSA:3.30.300.GENE3D); IPR000238 (PFAM); IPR000238 (TIGRFAM); IPR000238 (PANTHER); IPR020053 (PROSITE_PATTERNS); IPR000238 (HAMAP); IPR023799 (SUPERFAMILY)	P:GO:0006364	P:rRNA processing
WP_003111303.1	MULTISPECIES: methyltransferase domain-containing protein [Pseudomonas]	21	4	6	4	28.3	183	4	0	4	Yes	1.02926	0.587333		1.32979	0.0059138		1.50904	0.000637034	Up	1.3357	0.046529		PA4790		conserved hypothetical protein	PA4790	-1.31029	0.0348865	J	P:GO:0002098; P:GO:0030488; F:GO:0097697	P:tRNA wobble uridine modification; P:tRNA methylation; F:tRNA 5-carboxymethoxyuridine methyltransferase activity	EC:2.1.1	Transferring one-carbon groups	PF13489 (PFAM); G3DSA:3.40.50.150 (GENE3D); PTHR43464 (PANTHER); IPR033664 (HAMAP); cd02440 (CDD); IPR029063 (SUPERFAMILY)	F:GO:0008168	F:methyltransferase activity
WP_023465149.1	nicotinate-nucleotide adenylyltransferase [Pseudomonas aeruginosa]	19	4	8	4	23.8	211	4	0	4	Yes	1.05084	0.325733		1.3107	0.00162242		1.50805	0.000235761	Up	1.02128	0.763865		PA4006	nadD1	nicotinate mononucleotide adenylyltransferase NadD1				H	P:GO:0019674; P:GO:0034355; P:GO:0034628; F:GO:0000309; F:GO:0004515; F:GO:0005524	P:NAD metabolic process; P:NAD salvage; P:'de novo' NAD biosynthetic process from aspartate; F:nicotinamide-nucleotide adenylyltransferase activity; F:nicotinate-nucleotide adenylyltransferase activity; F:ATP binding	EC:2.7.7.18	Nicotinate-nucleotide adenylyltransferase	IPR005248 (TIGRFAM); IPR004821 (TIGRFAM); IPR004821 (PFAM); IPR014729 (G3DSA:3.40.50.GENE3D); PTHR39321 (PANTHER); IPR005248 (HAMAP); IPR005248 (CDD); SSF52374 (SUPERFAMILY)	P:GO:0009058; P:GO:0009435; F:GO:0003824; F:GO:0016779	P:biosynthetic process; P:NAD biosynthetic process; F:catalytic activity; F:nucleotidyltransferase activity
WP_003092626.1	MULTISPECIES: bifunctional protein-disulfide isomerase/oxidoreductase DsbC [Pseudomonas]	21	5	17	5	26.1	667	5	0	5	Yes	-1.04201	0.255198		1.24271	0.00396143		1.50345	0.00323295	Up	1.22323	0.0294321		PA3737	dsbC	thiol:disulfide interchange protein DsbC	dsbC	1.09832	0.266022	O	P:GO:0045454; F:GO:0016853; C:GO:0042597	P:cell redox homeostasis; F:isomerase activity; C:periplasmic space	EC:5	Isomerases	IPR018950 (PFAM); IPR012336 (PFAM); G3DSA:3.40.30.10 (GENE3D); IPR009094 (G3DSA:3.10.450.GENE3D); PTHR35272:SF3 (PANTHER); PTHR35272 (PANTHER); IPR017937 (PROSITE_PATTERNS); IPR013766 (PROSITE_PROFILES); IPR033954 (CDD); IPR009094 (SUPERFAMILY); IPR036249 (SUPERFAMILY)	C:GO:0042597	C:periplasmic space
WP_003086416.1	MULTISPECIES: DegT/DnrJ/EryC1/StrS family aminotransferase [Pseudomonas]	15	5	8	5	41.9	293	5	0	5	Yes	1.05441	0.6009		1.67973	0.00515826	Up	1.50026	0.0246901	Up										E	F:GO:0008483	F:transaminase activity	EC:2.6.1	Transferring nitrogenous groups	IPR000653 (PIRSF); IPR000653 (PFAM); IPR015421 (G3DSA:3.40.640.GENE3D); IPR000653 (PANTHER); PTHR30244:SF9 (PANTHER); IPR000653 (CDD); IPR015424 (SUPERFAMILY)	F:GO:0003824	F:catalytic activity
WP_003104132.1	MULTISPECIES: beta-ketoacyl-[acyl-carrier-protein] synthase II [Pseudomonas]	29	7	29	7	43.5	1179	7	0	7	Yes	1.0437	0.408754		1.45155	0.000267468		1.49732	9.41454e-05	Up	-1.511	3.86319e-05	Lower	PA2965	fabF1	beta-ketoacyl-acyl carrier protein synthase II	fabF1	-1.04938	0.587148	I	P:GO:0006633; F:GO:0004315; C:GO:0005829	P:fatty acid biosynthetic process; F:3-oxoacyl-[acyl-carrier-protein] synthase activity; C:cytosol	EC:2.3.1.41; EC:2.3.1.85	Beta-ketoacyl-[acyl-carrier-protein] synthase I; Fatty-acid synthase system	IPR014030 (PFAM); IPR016039 (G3DSA:3.40.47.GENE3D); IPR017568 (PIRSF); IPR016039 (G3DSA:3.40.47.GENE3D); IPR017568 (TIGRFAM); IPR014031 (PFAM); IPR000794 (PANTHER); PTHR11712:SF336 (PANTHER); IPR018201 (PROSITE_PATTERNS); IPR000794 (CDD); IPR016039 (SUPERFAMILY); IPR016039 (SUPERFAMILY)	P:GO:0006633; F:GO:0004315; F:GO:0016746; F:GO:0016747	P:fatty acid biosynthetic process; F:3-oxoacyl-[acyl-carrier-protein] synthase activity; F:acyltransferase activity; F:acyltransferase activity, transferring groups other than amino-acyl groups
WP_003095852.1	MULTISPECIES: HslU--HslV peptidase proteolytic subunit [Pseudomonas]	27	5	25	5	18.8	706	5	0	5	Yes	1.11572	0.0542721		1.31639	0.00130118		1.49732	0.00134201	Up	-1.29866	0.0248564		PA5053	hslV	heat shock protein HslV	hslV	1.18399	0.340087	O	P:GO:0009408; P:GO:0034214; P:GO:0051603; F:GO:0000287; F:GO:0004298; F:GO:0005524; F:GO:0019904; F:GO:0042802; C:GO:0005839; C:GO:0009376; C:GO:1904949	P:response to heat; P:protein hexamerization; P:proteolysis involved in cellular protein catabolic process; F:magnesium ion binding; F:threonine-type endopeptidase activity; F:ATP binding; F:protein domain specific binding; F:identical protein binding; C:proteasome core complex; C:HslUV protease complex; C:ATPase complex	EC:3.4.25	Acting on peptide bonds (peptidases)	IPR022281 (PIRSF); IPR029055 (G3DSA:3.60.20.GENE3D); IPR022281 (TIGRFAM); IPR001353 (PFAM); IPR022281 (PANTHER); IPR022281 (HAMAP); IPR023333 (PROSITE_PROFILES); IPR022281 (CDD); IPR029055 (SUPERFAMILY)	P:GO:0006508; P:GO:0051603; F:GO:0004298; C:GO:0005839; C:GO:0009376	P:proteolysis; P:proteolysis involved in cellular protein catabolic process; F:threonine-type endopeptidase activity; C:proteasome core complex; C:HslUV protease complex
WP_003091451.1	MULTISPECIES: bifunctional 3-demethylubiquinone 3-O-methyltransferase/2-octaprenyl-6-hydroxy phenol methylase [Pseudomonas]	45	8	24	8	25.9	803	8	0	8	Yes	1.0739	0.271465		1.25353	0.0221079		1.49685	0.00221422	Up	1.01494	0.861461		PA3171	ubiG	3-demethylubiquinone-9 3-methyltransferase	ubiG	1.26007	0.00672641	H	P:GO:0006744; P:GO:0032259; F:GO:0008425; F:GO:0008689	P:ubiquinone biosynthetic process; P:methylation; F:2-polyprenyl-6-methoxy-1,4-benzoquinone methyltransferase activity; F:3-demethylubiquinone-9 3-O-methyltransferase activity	EC:2.1.1.64	3-demethylubiquinol 3-O-methyltransferase	IPR010233 (TIGRFAM); G3DSA:3.40.50.150 (GENE3D); PF13489 (PFAM); PTHR43464:SF25 (PANTHER); PTHR43464 (PANTHER); IPR010233 (HAMAP); cd02440 (CDD); IPR029063 (SUPERFAMILY)	P:GO:0006744; F:GO:0008425	P:ubiquinone biosynthetic process; F:2-polyprenyl-6-methoxy-1,4-benzoquinone methyltransferase activity
WP_003091475.1	MULTISPECIES: DNA-binding response regulator [Pseudomonas]	10	2	3	2	27.4	66	2	0	2	Yes	-1.09493	0.409039		-1.18459	0.133937		1.49578	0.0103606	Up	1.01552	0.843747		PA3192	gltR	two-component response regulator GltR	gltR	1.45576	0.104625	T	P:GO:0000160; P:GO:0010828; P:GO:0045893; F:GO:0000156; F:GO:0000976; F:GO:0001216; C:GO:0005829; C:GO:0032993	P:phosphorelay signal transduction system; P:positive regulation of glucose transmembrane transport; P:positive regulation of transcription, DNA-templated; F:phosphorelay response regulator activity; F:transcription cis-regulatory region binding; F:DNA-binding transcription activator activity; C:cytosol; C:protein-DNA complex			G3DSA:6.10.250.690 (GENE3D); IPR001867 (PFAM); G3DSA:3.40.50.2300 (GENE3D); IPR001789 (PFAM); IPR036388 (G3DSA:1.10.10.GENE3D); IPR039420 (PANTHER); PTHR48111:SF48 (PANTHER); IPR001789 (PROSITE_PROFILES); IPR001867 (PROSITE_PROFILES); IPR001867 (CDD); IPR011006 (SUPERFAMILY); IPR016032 (SUPERFAMILY)	P:GO:0000160; P:GO:0006355; F:GO:0003677	P:phosphorelay signal transduction system; P:regulation of transcription, DNA-templated; F:DNA binding
WP_003114635.1	MULTISPECIES: DOPA 4,5-dioxygenase [Pseudomonas]	28	3	4	3	14.4	110	3	0	3	Yes	1.01983	0.811845		1.16592	0.179441		1.49441	0.0148436		1.42233	0.0560151		PA0032a		DOPA 4,5-dioxygenase	PA0032a	1.32058	0.225361	Q	F:GO:0051213	F:dioxygenase activity	EC:1	Oxidoreductases	IPR023389 (G3DSA:3.30.70.GENE3D); IPR014980 (PFAM); IPR014980 (PIRSF); IPR014980 (PANTHER); IPR023389 (SUPERFAMILY)	no GO terms	no GO terms
WP_003089047.1	MULTISPECIES: ABC transporter [Pseudomonas]	25	6	16	6	29.3	523	6	0	6	Yes	-1.05898	0.115183		1.17846	0.0021036		1.49431	1.36579e-05		-3.49268	1.17656e-08	Lower	PA2204		putative binding protein component of ABC transporter	PA2204	1.18872	0.65759	ET	P:GO:0034220; F:GO:0015276; C:GO:0016020	P:ion transmembrane transport; F:ligand-gated ion channel activity; C:membrane	EC:7	Translocases	IPR001638 (PFAM); G3DSA:3.40.190.10 (GENE3D); G3DSA:3.40.190.10 (GENE3D); PTHR30085 (PANTHER); PTHR30085:SF6 (PANTHER); cd13689 (CDD); SSF53850 (SUPERFAMILY)	no GO terms	no GO terms
WP_004350898.1	MULTISPECIES: low molecular weight phosphotyrosine protein phosphatase [Pseudomonas]	23	4	7	4	17.1	192	4	0	4	Yes	1.02207	0.560251		-1.05271	0.284163		1.49307	0.000161997		-1.39236	0.000473002		PA2978	ptpA	phosphotyrosine protein phosphatase	ptpA	-1.02434	0.840331	T	P:GO:0035335; F:GO:0004725	P:peptidyl-tyrosine dephosphorylation; F:protein tyrosine phosphatase activity	EC:3.1.3.48	Protein-tyrosine-phosphatase	IPR017867 (PRINTS); G3DSA:3.40.50.2300 (GENE3D); IPR023485 (PFAM); PTHR11717 (PANTHER); PTHR11717:SF7 (PANTHER); cd16343 (CDD); IPR036196 (SUPERFAMILY)	P:GO:0006470; F:GO:0004725	P:protein dephosphorylation; F:protein tyrosine phosphatase activity
WP_003092161.1	MULTISPECIES: glycerol kinase [Pseudomonas]	22	10	17	10	54.1	359	10	0	10	Yes	1.03126	0.475287		1.93681	4.99555e-06	Up	1.49185	7.38279e-05		-1.26671	0.0480302		PA3579		probable carbohydrate kinase	PA3579	-1.27262	0.16015	F	P:GO:0006072; P:GO:0016310; P:GO:0019563; F:GO:0004370; F:GO:0005524; C:GO:0005829	P:glycerol-3-phosphate metabolic process; P:phosphorylation; P:glycerol catabolic process; F:glycerol kinase activity; F:ATP binding; C:cytosol	EC:2.7.1.30	Glycerol kinase	IPR018484 (PFAM); G3DSA:3.30.420.40 (GENE3D); G3DSA:3.30.420.40 (GENE3D); IPR005999 (TIGRFAM); IPR000577 (PIRSF); IPR018485 (PFAM); PTHR10196:SF78 (PANTHER); PTHR10196 (PANTHER); IPR018483 (PROSITE_PATTERNS); IPR005999 (HAMAP); cd07786 (CDD); IPR043129 (SUPERFAMILY); IPR043129 (SUPERFAMILY)	P:GO:0005975; P:GO:0006072; F:GO:0004370; F:GO:0016773	P:carbohydrate metabolic process; P:glycerol-3-phosphate metabolic process; F:glycerol kinase activity; F:phosphotransferase activity, alcohol group as acceptor
WP_003112945.1	MULTISPECIES: DUF523 domain-containing protein [Pseudomonas]	31	4	7	4	17.4	305	4	0	4	Yes	-1.03456	0.584825		1.07456	0.369457		1.49118	0.000124019		1.34314	0.023912		PA0312		conserved hypothetical protein	PA0312	1.00696	0.957896	S					IPR007553 (PFAM); PTHR30087 (PANTHER); PTHR30087:SF1 (PANTHER)	no GO terms	no GO terms
WP_003109170.1	MULTISPECIES: ABC transporter ATP-binding protein [Pseudomonas]	50	14	36	14	36.2	888	14	0	14	Yes	1.10239	0.156465		1.16014	0.0521475		1.49117	0.000860585		2.75115	2.92104e-06	Higher	PA3254		probable ATP-binding component of ABC transporter	PA3254	-1.01407	0.907684	E	P:GO:0055085; F:GO:0005524; F:GO:0016887; F:GO:0022857	P:transmembrane transport; F:ATP binding; F:ATP hydrolysis activity; F:transmembrane transporter activity	EC:3.6.1; EC:7	Acting on acid anhydrides; Translocases	IPR013611 (PFAM); IPR003439 (PFAM); IPR027417 (G3DSA:3.40.50.GENE3D); PTHR42781 (PANTHER); IPR017871 (PROSITE_PATTERNS); IPR003439 (PROSITE_PROFILES); IPR008995 (SUPERFAMILY); IPR027417 (SUPERFAMILY)	P:GO:0055085; F:GO:0005524; F:GO:0022857; C:GO:0043190	P:transmembrane transport; F:ATP binding; F:transmembrane transporter activity; C:ATP-binding cassette (ABC) transporter complex
WP_003119759.1	MULTISPECIES: hypothetical protein [Pseudomonas]	4	2	3	2	54.3	92	2	0	2	Yes	1.01058	0.905051		1.25125	0.0540052		1.49081	0.0142685		1.29556	0.048674		PA3091		hypothetical protein	PA3091	-1.12506	0.309897	E					Coil (COILS); Coil (COILS); mobidb-lite (MOBIDB_LITE)	no GO terms	no GO terms
WP_023465017.1	MULTISPECIES: spermidine/putrescine ABC transporter substrate-binding protein [Pseudomonas]	12	4	5	4	39.3	124	4	0	4	Yes	-1.261	0.000943527		-1.43346	0.000487165		1.49038	0.000102937		-1.32701	0.00298444		PA3610	potD	polyamine transport protein PotD	potD	-1.77183	7.14e-05	E	P:GO:0015846; F:GO:0019808; C:GO:0042597	P:polyamine transport; F:polyamine binding; C:periplasmic space			IPR001188 (PRINTS); IPR001188 (PIRSF); G3DSA:3.40.190.10 (GENE3D); IPR006059 (PFAM); G3DSA:3.40.190.10 (GENE3D); PTHR30222:SF12 (PANTHER); PTHR30222 (PANTHER); cd13590 (CDD); SSF53850 (SUPERFAMILY)	P:GO:0015846; F:GO:0019808; C:GO:0042597	P:polyamine transport; F:polyamine binding; C:periplasmic space
WP_003084960.1	MULTISPECIES: phosphoglycerate kinase [Pseudomonas]	38	13	70	13	40.4	1902	13	0	13	Yes	1.01812	0.22307		1.35156	1.82779e-06		1.49031	1.72395e-07		-1.14531	0.000268257		PA0552	pgk	phosphoglycerate kinase	pgk	1.13544	0.0593453	F	P:GO:0006094; P:GO:0006096; P:GO:0006754; P:GO:0006805; P:GO:0009166; P:GO:0009168; P:GO:0019359; P:GO:0034404; P:GO:0042866; P:GO:1903862; F:GO:0004618; F:GO:0005524; F:GO:0043531; C:GO:0005829	P:gluconeogenesis; P:glycolytic process; P:ATP biosynthetic process; P:xenobiotic metabolic process; P:nucleotide catabolic process; P:purine ribonucleoside monophosphate biosynthetic process; P:nicotinamide nucleotide biosynthetic process; P:nucleobase-containing small molecule biosynthetic process; P:pyruvate biosynthetic process; P:positive regulation of oxidative phosphorylation; F:phosphogly…	EC:2.7.2.3	Phosphoglycerate kinase	IPR001576 (PRINTS); IPR015824 (G3DSA:3.40.50.GENE3D); IPR001576 (PFAM); IPR015824 (G3DSA:3.40.50.GENE3D); IPR001576 (PIRSF); PTHR11406:SF23 (PANTHER); IPR001576 (PANTHER); IPR015911 (PROSITE_PATTERNS); IPR001576 (HAMAP); IPR036043 (SUPERFAMILY)	P:GO:0006096; F:GO:0004618	P:glycolytic process; F:phosphoglycerate kinase activity
WP_014602712.1	MULTISPECIES: UDP-N-acetylmuramate dehydrogenase [Pseudomonas]	30	8	13	8	37.6	493	8	0	8	Yes	1.00302	0.92158		1.3439	0.000363563		1.49004	5.58645e-05		-1.18871	0.0310519		PA2977	murB	UDP-N-acetylpyruvoylglucosamine reductase	murB	1.0379	0.823313	M	P:GO:0007049; P:GO:0008360; P:GO:0051301; P:GO:0071555; F:GO:0008762; F:GO:0071949; C:GO:0005737	P:cell cycle; P:regulation of cell shape; P:cell division; P:cell wall organization; F:UDP-N-acetylmuramate dehydrogenase activity; F:FAD binding; C:cytoplasm	EC:1.1.1; EC:1.3.1.98	Acting on the CH-OH group of donors; UDP-N-acetylmuramate dehydrogenase	IPR011601 (PFAM); IPR016167 (G3DSA:3.30.43.GENE3D); IPR036635 (G3DSA:3.90.78.GENE3D); IPR016169 (G3DSA:3.30.465.GENE3D); IPR006094 (PFAM); IPR003170 (TIGRFAM); PTHR21071:SF4 (PANTHER); IPR003170 (PANTHER); IPR016166 (PROSITE_PROFILES); IPR003170 (HAMAP); IPR036318 (SUPERFAMILY); IPR036635 (SUPERFAMILY)	F:GO:0008762; F:GO:0016491; F:GO:0050660; F:GO:0071949	F:UDP-N-acetylmuramate dehydrogenase activity; F:oxidoreductase activity; F:flavin adenine dinucleotide binding; F:FAD binding
WP_003114698.1	MULTISPECIES: NAD(P)/FAD-dependent oxidoreductase [Pseudomonas]	21	5	10	5	35.9	395	5	0	5	Yes	-1.03361	0.25445		1.50937	9.69697e-06	Up	1.48922	0.000250633		-1.92612	6.06302e-06	Lower	PA4657		hypothetical protein	PA4657	1.22369	0.161968	S	P:GO:0008152; F:GO:0050661; F:GO:0050664; F:GO:0051287; F:GO:0071949	P:metabolic process; F:NADP binding; F:oxidoreductase activity, acting on NAD(P)H, oxygen as acceptor; F:NAD binding; F:FAD binding	EC:1.6.3	Acting on NADH or NADPH	IPR002937 (PFAM); IPR036188 (G3DSA:3.50.50.GENE3D); G3DSA:3.90.660.10 (GENE3D); PF13450 (PFAM); PTHR16128 (PANTHER); PTHR16128:SF5 (PANTHER); IPR034721 (HAMAP); IPR036188 (SUPERFAMILY)	F:GO:0000166; F:GO:0016491	F:nucleotide binding; F:oxidoreductase activity
WP_003095496.1	MULTISPECIES: c-di-GMP-binding multidrug transporter transcriptional regulator BrlR [Pseudomonas]	9	3	8	3	31.1	279	3	0	3	Yes	-1.03939	0.589286		1.50039	0.00540295	Up	1.48105	0.00144846		-1.62374	0.000236808	Lower	PA4878	brlR	BrlR	PA4878	1.10586	0.260457	K	P:GO:0045892; P:GO:0045893; F:GO:0000976; F:GO:0001216; C:GO:0032993	P:negative regulation of transcription, DNA-templated; P:positive regulation of transcription, DNA-templated; F:transcription cis-regulatory region binding; F:DNA-binding transcription activator activity; C:protein-DNA complex			IPR011256 (G3DSA:3.20.80.GENE3D); G3DSA:1.10.1660.10 (GENE3D); IPR000551 (PFAM); IPR029441 (PFAM); PTHR30204:SF2 (PANTHER); PTHR30204 (PANTHER); IPR000551 (PROSITE_PROFILES); cd01107 (CDD); IPR009061 (SUPERFAMILY); IPR011256 (SUPERFAMILY)	P:GO:0006355; F:GO:0003677	P:regulation of transcription, DNA-templated; F:DNA binding
WP_003092390.1	MULTISPECIES: ribosome-recycling factor [Pseudomonas]	72	13	70	13	20.5	2109	13	0	13	Yes	-1.05228	0.0966763		1.43734	1.28794e-06		1.47627	5.63878e-07		-1.19241	0.00532642		PA3653	frr	ribosome recycling factor	frr	1.56623	0.0366028	J	P:GO:0002184; F:GO:0008079; F:GO:0043023; C:GO:0005618; C:GO:0005829; C:GO:0005886	P:cytoplasmic translational termination; F:translation termination factor activity; F:ribosomal large subunit binding; C:cell wall; C:cytosol; C:plasma membrane			Coil (COILS); IPR002661 (TIGRFAM); IPR023584 (PFAM); G3DSA:3.30.1360.40 (GENE3D); IPR036191 (G3DSA:1.10.132.GENE3D); PTHR20982:SF3 (PANTHER); IPR002661 (PANTHER); IPR002661 (HAMAP); IPR002661 (CDD); IPR036191 (SUPERFAMILY)	P:GO:0006412	P:translation
WP_023464314.1	aldo/keto reductase [Pseudomonas aeruginosa]	14	4	7	4	30	188	4	0	4	Yes	1.11786	0.106628		1.16298	0.0491609		1.47606	0.0019121					PA0804		probable oxidoreductase	PA0804	-1.03233	0.61906	S	P:GO:0051596; F:GO:0016491	P:methylglyoxal catabolic process; F:oxidoreductase activity	EC:1	Oxidoreductases	IPR020471 (PRINTS); IPR036812 (G3DSA:3.20.20.GENE3D); IPR023210 (PFAM); IPR020471 (PIRSF); PTHR43638 (PANTHER); cd19138 (CDD); IPR036812 (SUPERFAMILY)	F:GO:0016491	F:oxidoreductase activity
WP_003093561.1	MULTISPECIES: peptidyl-prolyl cis-trans isomerase [Pseudomonas]	51	4	8	4	10	348	4	0	4	Yes	1.0584	0.581817		1.74594	0.0152939	Up	1.47381	0.0522028					PA4176	ppiC2	peptidyl-prolyl cis-trans isomerase C2	ppiC2	-1.22578	0.239533	G	P:GO:0000413; F:GO:0003755	P:protein peptidyl-prolyl isomerization; F:peptidyl-prolyl cis-trans isomerase activity	EC:5.2.1.8	Peptidylprolyl isomerase	PF13616 (PFAM); G3DSA:3.10.50.40 (GENE3D); PTHR43629 (PANTHER); IPR023058 (PROSITE_PATTERNS); IPR000297 (PROSITE_PROFILES); SSF54534 (SUPERFAMILY)	F:GO:0003755	F:peptidyl-prolyl cis-trans isomerase activity
WP_023088440.1	MULTISPECIES: glutathione peroxidase [Pseudomonas]	32	6	16	6	20.3	402	6	0	6	Yes	1.05383	0.122339		1.8086	4.04362e-05	Up	1.4729	0.00108372		-2.03402	8.27576e-07	Lower	PA1287		probable glutathione peroxidase	PA1287	1.17193	0.261942	O	P:GO:0006979; P:GO:0098869; F:GO:0004602	P:response to oxidative stress; P:cellular oxidant detoxification; F:glutathione peroxidase activity	EC:1.11.1.9	Glutathione peroxidase	IPR000889 (PRINTS); IPR000889 (PIRSF); G3DSA:3.40.30.10 (GENE3D); IPR000889 (PFAM); mobidb-lite (MOBIDB_LITE); IPR000889 (PANTHER); PTHR11592:SF44 (PANTHER); IPR029759 (PROSITE_PATTERNS); IPR013766 (PROSITE_PROFILES); IPR000889 (PROSITE_PROFILES); IPR000889 (CDD); IPR036249 (SUPERFAMILY)	P:GO:0006979; F:GO:0004602	P:response to oxidative stress; F:glutathione peroxidase activity
WP_003111187.1	MULTISPECIES: aspartate-semialdehyde dehydrogenase [Pseudomonas]	22	7	27	7	40.5	770	7	0	7	Yes	0.99939	0.985808		1.30882	0.00235177		1.47269	0.000384858		-1.20323	0.00489027		PA3117	asd	aspartate semialdehyde dehydrogenase	asd	-1.0371	0.727792	E	P:GO:0006974; P:GO:0009088; P:GO:0009089; P:GO:0009090; P:GO:0009097; P:GO:0019877; P:GO:0071266; F:GO:0004073; F:GO:0046983; F:GO:0050661; F:GO:0051287; C:GO:0005829	P:cellular response to DNA damage stimulus; P:threonine biosynthetic process; P:lysine biosynthetic process via diaminopimelate; P:homoserine biosynthetic process; P:isoleucine biosynthetic process; P:diaminopimelate biosynthetic process; P:'de novo' L-methionine biosynthetic process; F:aspartate-semialdehyde dehydrogenase activity; F:protein dimerization activity; F:NADP binding; F:NAD binding; …	EC:1.2.1.11	Aspartate-semialdehyde dehydrogenase	PIRSF000148 (PIRSF); IPR011534 (TIGRFAM); IPR000534 (PFAM); G3DSA:3.30.360.10 (GENE3D); IPR012280 (PFAM); G3DSA:3.40.50.720 (GENE3D); PTHR46278 (PANTHER); IPR011534 (PTHR46278:PANTHER); IPR000319 (PROSITE_PATTERNS); IPR012080 (HAMAP); SSF55347 (SUPERFAMILY); IPR036291 (SUPERFAMILY)	P:GO:0006520; P:GO:0008652; P:GO:0009086; P:GO:0009088; P:GO:0009089; P:GO:0009097; F:GO:0004073; F:GO:0016620; F:GO:0046983; F:GO:0050661; F:GO:0051287	P:cellular amino acid metabolic process; P:cellular amino acid biosynthetic process; P:methionine biosynthetic process; P:threonine biosynthetic process; P:lysine biosynthetic process via diaminopimelate; P:isoleucine biosynthetic process; F:aspartate-semialdehyde dehydrogenase activity; F:oxidoreductase activity, acting on the aldehyde or oxo group of donors, NAD or NADP as acceptor; F:protein d…
WP_003083049.1	MULTISPECIES: flagellar motor switch protein FliN [Pseudomonas]	23	3	13	3	16.6	476	3	0	3	Yes	1.03779	0.149385		1.51204	0.000472676	Up	1.46388	2.16354e-05		-1.27425	0.000860146		PA1444	fliN	flagellar motor switch protein FliN	fliN	1.15044	0.168994	N	P:GO:0006935; P:GO:0071973; F:GO:0003774; C:GO:0005886; C:GO:0009425	P:chemotaxis; P:bacterial-type flagellum-dependent cell motility; F:cytoskeletal motor activity; C:plasma membrane; C:bacterial-type flagellum basal body			IPR001172 (PRINTS); IPR001543 (PFAM); IPR012826 (TIGRFAM); IPR036429 (G3DSA:2.30.330.GENE3D); mobidb-lite (MOBIDB_LITE); PTHR43484 (PANTHER); IPR036429 (SUPERFAMILY)	P:GO:0006935; P:GO:0071973; F:GO:0003774; C:GO:0009288; C:GO:0009425; C:GO:0016020	P:chemotaxis; P:bacterial-type flagellum-dependent cell motility; F:cytoskeletal motor activity; C:bacterial-type flagellum; C:bacterial-type flagellum basal body; C:membrane
WP_003082694.1	MULTISPECIES: DUF4440 domain-containing protein [Pseudomonas]	13	2	4	2	14.2	135	2	0	2	Yes	1.04481	0.703604		1.45195	0.123035		1.46285	0.217801		0.889822	0.99335		PA1314		hypothetical protein				S					G3DSA:3.10.450.50 (GENE3D); IPR016918 (PIRSF); IPR027843 (PFAM); IPR032710 (SUPERFAMILY)	no GO terms	no GO terms
WP_003102926.1	MULTISPECIES: precorrin-4 C(11)-methyltransferase [Pseudomonas]	34	6	16	6	27	567	6	0	6	Yes	1.03815	0.676273		1.17195	0.0862923		1.46185	0.00975239		1.31986	0.0315379		PA2948	cobM	precorrin-3 methylase	cobM	1.12702	0.349953	H	P:GO:0009236; P:GO:0032259; F:GO:0046026	P:cobalamin biosynthetic process; P:methylation; F:precorrin-4 C11-methyltransferase activity	EC:2.1.1.133	Precorrin-4 C(11)-methyltransferase	Coil (COILS); IPR014777 (G3DSA:3.40.1010.GENE3D); IPR000878 (PFAM); IPR014776 (G3DSA:3.30.950.GENE3D); IPR006362 (TIGRFAM); PTHR45790 (PANTHER); PTHR45790:SF4 (PANTHER); IPR003043 (PROSITE_PATTERNS); IPR006362 (CDD); IPR035996 (SUPERFAMILY)	P:GO:0009236; F:GO:0008168; F:GO:0046026	P:cobalamin biosynthetic process; F:methyltransferase activity; F:precorrin-4 C11-methyltransferase activity
WP_003122579.1	MULTISPECIES: NAD(P)/FAD-dependent oxidoreductase [Pseudomonas]	25	7	14	7	42.6	434	7	0	7	Yes	-1.09279	0.0943221		-1.14225	0.0163001		1.46179	8.94955e-05		3.11179	9.91179e-06	Higher	PA2691		conserved hypothetical protein	PA2691	1.20771	0.0509291	C	P:GO:0006116; F:GO:0003954	P:NADH oxidation; F:NADH dehydrogenase activity	EC:1.6	Acting on NADH or NADPH	PR00411 (PRINTS); PR00368 (PRINTS); IPR023753 (PFAM); G3DSA:3.50.50.100 (GENE3D); PTHR43706:SF15 (PANTHER); IPR045024 (PANTHER); IPR036188 (SUPERFAMILY)	P:GO:0006116; F:GO:0003954; F:GO:0016491	P:NADH oxidation; F:NADH dehydrogenase activity; F:oxidoreductase activity
WP_003113871.1	MULTISPECIES: RNA polymerase sigma factor RpoS [Pseudomonas]	24	7	26	7	38.2	509	7	0	7	Yes	0.995996	0.915073		1.14014	0.160861		1.45812	0.000442745		-1.48081	6.86761e-05		PA3622	rpoS	sigma factor RpoS	rpoS	1.14071	0.348116	K	P:GO:0043254; P:GO:0050921; P:GO:1900034; P:GO:1900233; P:GO:1900377; P:GO:1900407; P:GO:1901000; P:GO:2000142; P:GO:2000145; F:GO:0001000; F:GO:0003677; F:GO:0016987; C:GO:0005737	P:regulation of protein-containing complex assembly; P:positive regulation of chemotaxis; P:regulation of cellular response to heat; P:positive regulation of single-species biofilm formation on inanimate substrate; P:negative regulation of secondary metabolite biosynthetic process; P:regulation of cellular response to oxidative stress; P:regulation of response to salt stress; P:regulation of DNA-…			IPR000943 (PRINTS); IPR007627 (PFAM); G3DSA:1.10.601.10 (GENE3D); IPR007630 (PFAM); IPR012761 (TIGRFAM); IPR009042 (PFAM); IPR036388 (G3DSA:1.10.10.GENE3D); IPR014284 (TIGRFAM); IPR007624 (PFAM); IPR036388 (G3DSA:1.10.10.GENE3D); mobidb-lite (MOBIDB_LITE); mobidb-lite (MOBIDB_LITE); PTHR30603 (PANTHER); PTHR30603:SF15 (PANTHER); IPR000943 (PROSITE_PATTERNS); IPR000943 (PROSITE_PATTERNS); IPR01276…	P:GO:0006352; P:GO:0006355; F:GO:0003677; F:GO:0003700; F:GO:0016987	P:DNA-templated transcription, initiation; P:regulation of transcription, DNA-templated; F:DNA binding; F:DNA-binding transcription factor activity; F:sigma factor activity
WP_003095857.1	MULTISPECIES: DUF971 domain-containing protein [Pseudomonas]	49	4	6	4	13.6	152	4	0	4	Yes	1.01125	0.951676		1.41854	0.0082497		1.45603	5.60656e-05		-1.12918	0.00252292		PA5055		hypothetical protein	PA5055	1.1942	0.216908	S	F:GO:0016853	F:isomerase activity	EC:5	Isomerases	IPR010376 (PFAM); IPR038492 (G3DSA:3.30.2020.GENE3D); PTHR35303:SF3 (PANTHER); PTHR35303 (PANTHER)	no GO terms	no GO terms
WP_003096424.1	MULTISPECIES: nucleoside diphosphate kinase regulator [Pseudomonas]	49	4	24	4	14.4	535	4	0	4	Yes	1.01006	0.851155		1.44838	0.00104218		1.45471	0.000387665		1.20584	0.00289465		PA5274	rnk	nucleoside diphosphate kinase regulator	rnk	1.02602	0.866811	K	P:GO:0006414; P:GO:0016310; P:GO:0032784; F:GO:0003677; F:GO:0003746; F:GO:0016301; F:GO:0070063	P:translational elongation; P:phosphorylation; P:regulation of DNA-templated transcription, elongation; F:DNA binding; F:translation elongation factor activity; F:kinase activity; F:RNA polymerase binding	EC:2.7	Transferring phosphorus-containing groups	IPR029462 (PFAM); G3DSA:1.10.286.20 (GENE3D); IPR001437 (PFAM); IPR023459 (PIRSF); IPR036953 (G3DSA:3.10.50.GENE3D); IPR023459 (PANTHER); PTHR30437:SF5 (PANTHER); SSF54534 (SUPERFAMILY)	P:GO:0032784; F:GO:0003677; F:GO:0070063	P:regulation of DNA-templated transcription, elongation; F:DNA binding; F:RNA polymerase binding
WP_003098459.1	MULTISPECIES: Cys-tRNA(Pro) deacylase [Pseudomonas]	33	5	11	5	16.5	397	5	0	5	Yes	1.0435	0.165413		1.8943	9.40565e-07	Up	1.45466	2.01876e-05		-1.11734	0.0103343		PA3580		conserved hypothetical protein	PA3580	-1.42467	0.00270651	S	P:GO:0006412; P:GO:0010165; P:GO:0106074; F:GO:0016829; F:GO:0043906; F:GO:0043907; C:GO:0005829	P:translation; P:response to X-ray; P:aminoacyl-tRNA metabolism involved in translational fidelity; F:lyase activity; F:Ala-tRNA(Pro) hydrolase activity; F:Cys-tRNA(Pro) hydrolase activity; C:cytosol	EC:4; EC:3.1.1.1	Lyases; Carboxylesterase	IPR007214 (PFAM); IPR004369 (PIRSF); IPR036754 (G3DSA:3.90.960.GENE3D); IPR004369 (TIGRFAM); PTHR30411 (PANTHER); PTHR30411:SF8 (PANTHER); IPR004369 (CDD); IPR036754 (SUPERFAMILY)	F:GO:0002161	F:aminoacyl-tRNA editing activity
WP_023465245.1	flavodoxin [Pseudomonas aeruginosa]	17	12	25	12	94.2	841	12	0	12	Yes	-1.06188	0.0144135		1.12249	0.0432356		1.45436	0.00112146		1.62804	0.00115256	Higher	PA4513		probable oxidoreductase	PA4513	1.46272	0.00375665	P	P:GO:0071281; F:GO:0010181; F:GO:0016491; F:GO:0050660; C:GO:0005829; C:GO:0016021	P:cellular response to iron ion; F:FMN binding; F:oxidoreductase activity; F:flavin adenine dinucleotide binding; C:cytosol; C:integral component of membrane	EC:1	Oxidoreductases	IPR001094 (PRINTS); IPR001709 (PRINTS); IPR029039 (G3DSA:3.40.50.GENE3D); IPR008254 (PFAM); IPR039261 (G3DSA:3.40.50.GENE3D); IPR001433 (PFAM); IPR005625 (PFAM); PTHR19384:SF87 (PANTHER); PTHR19384 (PANTHER); IPR017927 (PROSITE_PROFILES); IPR008254 (PROSITE_PROFILES); cd06200 (CDD); IPR029039 (SUPERFAMILY); IPR039261 (SUPERFAMILY); IPR017938 (SUPERFAMILY)	F:GO:0010181; F:GO:0016491	F:FMN binding; F:oxidoreductase activity
WP_003112742.1	MULTISPECIES: hypothetical protein [Pseudomonas]	42	7	15	7	19.3	337	7	0	7	Yes	1.06968	0.257231		1.29896	0.00440029		1.45434	0.00116794		0.869109	0.255247		PA4458		conserved hypothetical protein	PA4458	1.02846	0.661318	S	P:GO:0009103; P:GO:0016311; F:GO:0019143; F:GO:0046872	P:lipopolysaccharide biosynthetic process; P:dephosphorylation; F:3-deoxy-manno-octulosonate-8-phosphatase activity; F:metal ion binding	EC:3.1.3.45	3-deoxy-manno-octulosonate-8-phosphatase	PF08282 (PFAM); IPR010023 (TIGRFAM); IPR010023 (PIRSF); IPR023214 (G3DSA:3.40.50.GENE3D); SFLDG01136 (SFLD); SFLDF00036 (SFLD); PTHR21485 (PANTHER); PTHR21485:SF5 (PANTHER); cd01630 (CDD); IPR036412 (SUPERFAMILY)	F:GO:0016788	F:hydrolase activity, acting on ester bonds
WP_003112608.1	MULTISPECIES: aspartate aminotransferase family protein [Pseudomonas]	57	18	88	18	43.7	2895	18	0	18	Yes	-1.02108	0.404933		1.32594	6.87283e-05		1.45379	2.16672e-06		-1.21134	0.000309744		PA0895	aruC	N2-Succinylornithine 5-aminotransferase (SOAT) = N2-acetylornithine 5-aminotransferase (ACOAT)	aruC	1.39928	0.0289497	E	P:GO:0006526; P:GO:0019545; F:GO:0003992; F:GO:0030170; F:GO:0043825; C:GO:0005737	P:arginine biosynthetic process; P:arginine catabolic process to succinate; F:N2-acetyl-L-ornithine:2-oxoglutarate 5-aminotransferase activity; F:pyridoxal phosphate binding; F:succinylornithine transaminase activity; C:cytoplasm	EC:2.6.1.11; EC:2.6.1.81	Acetylornithine transaminase; Succinylornithine transaminase	IPR015422 (G3DSA:3.90.1150.GENE3D); IPR005814 (PFAM); IPR005814 (PIRSF); IPR004636 (TIGRFAM); IPR017652 (TIGRFAM); IPR015421 (G3DSA:3.40.640.GENE3D); PTHR11986 (PANTHER); PTHR11986:SF113 (PANTHER); IPR005814 (PROSITE_PATTERNS); IPR004636 (HAMAP); IPR005814 (CDD); IPR015424 (SUPERFAMILY)	P:GO:0006520; P:GO:0006525; F:GO:0003824; F:GO:0008483; F:GO:0030170	P:cellular amino acid metabolic process; P:arginine metabolic process; F:catalytic activity; F:transaminase activity; F:pyridoxal phosphate binding
WP_023464257.1	allophanate hydrolase subunit 2 family protein [Pseudomonas aeruginosa]	40	10	17	10	34.6	546	10	0	10	Yes	1.01196	0.777156		1.02294	0.610096		1.44838	0.000137567		1.7993	2.55649e-05	Higher	PA0496		conserved hypothetical protein	PA0496	1.54446	0.246229	E	F:GO:0016740; F:GO:0016787	F:transferase activity; F:hydrolase activity	EC:2; EC:3	Transferases; Hydrolases	IPR003778 (PFAM); IPR029000 (G3DSA:2.40.100.GENE3D); IPR003778 (TIGRFAM); PTHR43309 (PANTHER); IPR029000 (SUPERFAMILY)	no GO terms	no GO terms
WP_003120688.1	MULTISPECIES: D-glycero-beta-D-manno-heptose 1,7-bisphosphate 7-phosphatase [Pseudomonas]	20	3	6	3	19.1	223	3	0	3	Yes	-1.02045	0.685577		1.29683	0.00468026		1.4481	0.000983659		0.926802	0.174033		PA0006		conserved hypothetical protein	PA0006	1.0058	0.964713	G	P:GO:0009244; P:GO:0016311; P:GO:0097171; F:GO:0000287; F:GO:0008270; F:GO:0034200; C:GO:0005737	P:lipopolysaccharide core region biosynthetic process; P:dephosphorylation; P:ADP-L-glycero-beta-D-manno-heptose biosynthetic process; F:magnesium ion binding; F:zinc ion binding; F:D,D-heptose 1,7-bisphosphate phosphatase activity; C:cytoplasm	EC:3.1.3	Acting on ester bonds	IPR023214 (G3DSA:3.40.50.GENE3D); IPR006543 (TIGRFAM); IPR006549 (TIGRFAM); IPR004446 (PIRSF); PF13242 (PFAM); IPR004446 (PANTHER); cd07503 (CDD); IPR036412 (SUPERFAMILY)	P:GO:0005975; F:GO:0016791	P:carbohydrate metabolic process; F:phosphatase activity
WP_003092637.1	MULTISPECIES: 50S ribosomal protein L19 [Pseudomonas]	54	5	52	5	13	1719	5	0	5	Yes	-1.03732	0.261975		-1.11522	0.0105771		1.44564	1.45226e-05		1.47554	1.38194e-05		PA3742	rplS	50S ribosomal protein L19	rplS	1.74007	0.0508253	J	P:GO:0000027; P:GO:0006412; F:GO:0003735; F:GO:0070180; C:GO:0005886	P:ribosomal large subunit assembly; P:translation; F:structural constituent of ribosome; F:large ribosomal subunit rRNA binding; C:plasma membrane			IPR001857 (PRINTS); IPR001857 (PIRSF); IPR001857 (PFAM); IPR001857 (TIGRFAM); IPR038657 (G3DSA:2.30.30.GENE3D); PTHR15680:SF9 (PANTHER); IPR001857 (PANTHER); IPR018257 (PROSITE_PATTERNS); IPR001857 (HAMAP); IPR008991 (SUPERFAMILY)	P:GO:0006412; F:GO:0003735; C:GO:0005840	P:translation; F:structural constituent of ribosome; C:ribosome
WP_003099086.1	MULTISPECIES: 50S ribosomal protein L20 [Pseudomonas]	35	5	27	5	13.4	596	5	0	5	Yes	-1.03331	0.510867		-1.10923	0.116196		1.44365	0.000103757		1.07562	0.0939403		PA2741	rplT	50S ribosomal protein L20	rplT	1.89296	0.0341379	J	P:GO:0000027; P:GO:0006355; P:GO:0017148; F:GO:0000900; F:GO:0003729; F:GO:0003735; F:GO:0070180; C:GO:0005886	P:ribosomal large subunit assembly; P:regulation of transcription, DNA-templated; P:negative regulation of translation; F:translation repressor activity, mRNA regulatory element binding; F:mRNA binding; F:structural constituent of ribosome; F:large ribosomal subunit rRNA binding; C:plasma membrane			IPR005813 (PRINTS); IPR005813 (TIGRFAM); IPR005813 (PFAM); G3DSA:6.10.160.10 (GENE3D); IPR035566 (G3DSA:1.10.1900.GENE3D); IPR005813 (PANTHER); IPR005813 (PROSITE_PATTERNS); IPR005813 (HAMAP); IPR005813 (CDD); IPR035566 (SUPERFAMILY)	P:GO:0006412; F:GO:0003735; F:GO:0019843; C:GO:0005840	P:translation; F:structural constituent of ribosome; F:rRNA binding; C:ribosome
WP_003099726.1	MULTISPECIES: MurR/RpiR family transcriptional regulator [Pseudomonas]	13	4	8	4	32.1	184	4	0	4	Yes	1.20143	0.0305887		1.53628	0.00057873	Up	1.44322	0.00332353		-1.29125	0.0074508		PA5506		hypothetical protein	PA5506	1.08055	0.806931	K	P:GO:0006355; P:GO:1901135; F:GO:0003677; F:GO:0003700; F:GO:0097367	P:regulation of transcription, DNA-templated; P:carbohydrate derivative metabolic process; F:DNA binding; F:DNA-binding transcription factor activity; F:carbohydrate derivative binding			G3DSA:3.40.50.10490 (GENE3D); IPR001347 (PFAM); IPR000281 (PFAM); IPR036388 (G3DSA:1.10.10.GENE3D); PTHR30514:SF18 (PANTHER); PTHR30514 (PANTHER); IPR000281 (PROSITE_PROFILES); IPR035472 (CDD); SSF53697 (SUPERFAMILY); IPR009057 (SUPERFAMILY)	P:GO:0006355; P:GO:1901135; F:GO:0003700; F:GO:0097367	P:regulation of transcription, DNA-templated; P:carbohydrate derivative metabolic process; F:DNA-binding transcription factor activity; F:carbohydrate derivative binding
WP_003102394.1	MULTISPECIES: NAD(P)H:quinone oxidoreductase [Pseudomonas]	28	5	17	5	20.7	477	5	0	5	Yes	1.14761	0.147854		1.50208	0.00557411	Up	1.44316	0.0085203		0.969274	0.642853		PA0949	wrbA	Trp repressor binding protein WrbA	wrbA	1.0948	0.34354	S	P:GO:0022900; F:GO:0003955; F:GO:0009055; F:GO:0010181	P:electron transport chain; F:NAD(P)H dehydrogenase (quinone) activity; F:electron transfer activity; F:FMN binding	EC:1.6.5.2	NAD(P)H dehydrogenase (quinone)	IPR029039 (G3DSA:3.40.50.GENE3D); IPR005025 (PFAM); IPR010089 (TIGRFAM); PTHR30546 (PANTHER); PTHR30546:SF23 (PANTHER); IPR001226 (PROSITE_PATTERNS); IPR008254 (PROSITE_PROFILES); IPR029039 (SUPERFAMILY)	F:GO:0003955; F:GO:0009055; F:GO:0010181; F:GO:0016491	F:NAD(P)H dehydrogenase (quinone) activity; F:electron transfer activity; F:FMN binding; F:oxidoreductase activity
WP_003095833.1	MULTISPECIES: shikimate kinase [Pseudomonas]	26	4	8	4	19.2	235	4	0	4	Yes	-1.03409	0.313949		1.10567	0.0189349		1.44023	5.0529e-05		0.931688	0.431104		PA5039	aroK	shikimate kinase	aroK	1.0437	0.636673	F	P:GO:0009073; P:GO:0009423; P:GO:0016310; P:GO:0019632; F:GO:0000287; F:GO:0004765; F:GO:0005524; C:GO:0005829	P:aromatic amino acid family biosynthetic process; P:chorismate biosynthetic process; P:phosphorylation; P:shikimate metabolic process; F:magnesium ion binding; F:shikimate kinase activity; F:ATP binding; C:cytosol	EC:2.7.1.71	Shikimate kinase	PR01100 (PRINTS); IPR031322 (PFAM); IPR027417 (G3DSA:3.40.50.GENE3D); PTHR21087:SF16 (PANTHER); PTHR21087 (PANTHER); IPR023000 (PROSITE_PATTERNS); IPR000623 (HAMAP); IPR000623 (CDD); IPR027417 (SUPERFAMILY)	no GO terms	no GO terms
WP_003091489.1	MULTISPECIES: YciI family protein [Pseudomonas]	30	4	9	4	10.6	221	4	0	4	Yes	-1.02254	0.903933		1.24866	0.0903742		1.43995	0.0238516		1.09668	0.524623		PA3202		conserved hypothetical protein	PA3202	1.11911	0.329458	S	C:GO:0005829	C:cytosol			IPR005545 (PFAM); G3DSA:3.30.70.1060 (GENE3D); PTHR33606 (PANTHER); IPR011008 (SUPERFAMILY)	no GO terms	no GO terms
WP_110183978.1	RtcB family protein [Pseudomonas aeruginosa]	6	2	2	2	44.4	50	2	0	2	Yes	-1.05219	0.827371		1.58362	0.0861969		1.43931	0.478158		1.12946	0.564884		PA4583		conserved hypothetical protein	PA4583	-2.82831	1.23e-06	S	P:GO:0006266; P:GO:0006281; P:GO:0006396; P:GO:0042245; F:GO:0003909; F:GO:0008452; F:GO:0030145	P:DNA ligation; P:DNA repair; P:RNA processing; P:RNA repair; F:DNA ligase activity; F:RNA ligase activity; F:manganese ion binding	EC:6.5	Forming phosphoric ester bonds	IPR001233 (PFAM); IPR036025 (G3DSA:3.90.1860.GENE3D); PTHR43749 (PANTHER); IPR001233 (PROSITE_PATTERNS); IPR036025 (SUPERFAMILY)	P:GO:0006396; F:GO:0008452	P:RNA processing; F:RNA ligase activity
WP_110183956.1	EstA family serine hydrolase [Pseudomonas aeruginosa]	10	4	6	4	42.4	95	4	0	4	Yes	-1.13434	0.171885		0.995567	0.85867		1.43889	0.330561					PA1047		probable esterase	PA1047	1.01936	0.831237	V	F:GO:0016787	F:hydrolase activity	EC:3	Hydrolases	IPR012338 (G3DSA:3.40.710.GENE3D); IPR001466 (PFAM); PTHR43319 (PANTHER); PTHR43319:SF3 (PANTHER); IPR012338 (SUPERFAMILY)	no GO terms	no GO terms
WP_003113231.1	MULTISPECIES: methyltransferase domain-containing protein [Pseudomonas]	8	3	6	3	36.1	131	3	0	3	Yes	1.02397	0.397866		1.37771	0.0034654		1.43864	0.00260053		0.997408	0.956492		PA0547		probable transcriptional regulator	PA0547	1.29977	0.0600916	KQ	P:GO:0006355; P:GO:0032259; F:GO:0003700; F:GO:0008168	P:regulation of transcription, DNA-templated; P:methylation; F:DNA-binding transcription factor activity; F:methyltransferase activity	EC:2.1.1	Transferring one-carbon groups	IPR001845 (PRINTS); G3DSA:3.40.50.150 (GENE3D); IPR036388 (G3DSA:1.10.10.GENE3D); IPR013216 (PFAM); PF12840 (PFAM); PTHR42912:SF25 (PANTHER); PTHR42912 (PANTHER); PTHR42912:SF25 (PANTHER); PTHR42912 (PANTHER); IPR001845 (PROSITE_PROFILES); IPR011991 (CDD); cd02440 (CDD); IPR029063 (SUPERFAMILY); IPR036390 (SUPERFAMILY)	P:GO:0006355; F:GO:0003700; F:GO:0008168	P:regulation of transcription, DNA-templated; F:DNA-binding transcription factor activity; F:methyltransferase activity
WP_003082220.1	MULTISPECIES: flagella biosynthesis chaperone FliJ [Pseudomonas]	18	3	4	3	17.4	105	3	0	3	Yes	1.15332	0.328738		1.57649	0.0391186	Up	1.43795	0.0723223		0.667251	0.0798119		PA1105	fliJ	flagellar protein FliJ	fliJ	-1.20909	0.0473998	N	P:GO:0006935; P:GO:0071973; F:GO:0003774; C:GO:0016020	P:chemotaxis; P:bacterial-type flagellum-dependent cell motility; F:cytoskeletal motor activity; C:membrane			Coil (COILS); Coil (COILS); IPR018006 (PRINTS); IPR018006 (PIRSF); IPR012823 (PFAM); G3DSA:1.10.287.1700 (GENE3D); IPR012823 (TIGRFAM); PTHR38786 (PANTHER)	P:GO:0006935; P:GO:0071973; F:GO:0003774; C:GO:0009288; C:GO:0016020	P:chemotaxis; P:bacterial-type flagellum-dependent cell motility; F:cytoskeletal motor activity; C:bacterial-type flagellum; C:membrane
WP_003161846.1	MULTISPECIES: bifunctional DNA-binding transcriptional regulator/O6-methylguanine-DNA methyltransferase Ada [Pseudomonas]	27	8	16	8	39.4	640	8	0	8	Yes	1.03781	0.20347		1.35428	7.76001e-05		1.43717	4.19352e-05		1.28188	0.00386655		PA2118	ada	O6-methylguanine-DNA methyltransferase	ada	1.18993	0.0395531	FL	P:GO:0006307; P:GO:0010628; P:GO:0010629; P:GO:0018125; P:GO:0045892; P:GO:0045893; P:GO:0080111; F:GO:0003700; F:GO:0003908; F:GO:0008270; F:GO:0043565	P:DNA dealkylation involved in DNA repair; P:positive regulation of gene expression; P:negative regulation of gene expression; P:peptidyl-cysteine methylation; P:negative regulation of transcription, DNA-templated; P:positive regulation of transcription, DNA-templated; P:DNA demethylation; F:DNA-binding transcription factor activity; F:methylated-DNA-[protein]-cysteine S-methyltransferase activit…	EC:2.1.1.63	Methylated-DNA--[protein]-cysteine S-methyltransferase	Coil (COILS); IPR016221 (PIRSF); G3DSA:1.10.10.60 (GENE3D); G3DSA:3.30.160.70 (GENE3D); G3DSA:1.10.10.60 (GENE3D); IPR036388 (G3DSA:1.10.10.GENE3D); IPR014048 (PFAM); IPR018060 (PFAM); IPR014048 (TIGRFAM); IPR035451 (G3DSA:3.40.10.GENE3D); IPR004026 (PFAM); PTHR10815 (PANTHER); PTHR10815:SF14 (PANTHER); IPR001497 (PROSITE_PATTERNS); IPR018060 (PROSITE_PROFILES); IPR014048 (CDD); IPR035451 (SUPERF…	P:GO:0006281; P:GO:0006355; F:GO:0003677; F:GO:0003700; F:GO:0003824; F:GO:0003908; F:GO:0008168; F:GO:0008270; F:GO:0043565	P:DNA repair; P:regulation of transcription, DNA-templated; F:DNA binding; F:DNA-binding transcription factor activity; F:catalytic activity; F:methylated-DNA-[protein]-cysteine S-methyltransferase activity; F:methyltransferase activity; F:zinc ion binding; F:sequence-specific DNA binding
WP_003098742.1	MULTISPECIES: flagellar biosynthesis anti-sigma factor FlgM [Pseudomonas]	85	7	15	7	11.2	448	7	0	7	Yes	1.14997	0.524025		2.14825	0.00244908	Up	1.43503	0.090711		1.03373	0.805117		PA3351	flgM	FlgM	flgM	-1.22374	0.116127	KNU	P:GO:0045892; F:GO:0016989	P:negative regulation of transcription, DNA-templated; F:sigma factor antagonist activity			IPR031316 (PFAM); IPR007412 (TIGRFAM); mobidb-lite (MOBIDB_LITE); mobidb-lite (MOBIDB_LITE); mobidb-lite (MOBIDB_LITE); IPR035890 (SUPERFAMILY)	P:GO:0045892	P:negative regulation of transcription, DNA-templated
WP_003139541.1	MULTISPECIES: chromosome segregation protein SMC [Pseudomonas]	13	6	10	6	61.4	264	6	0	6	Yes	-1.02041	0.847226		1.41318	0.0169883		1.43452	0.0109557											L	P:GO:0090305; F:GO:0004519; F:GO:0005524; F:GO:0016887	P:nucleic acid phosphodiester bond hydrolysis; F:endonuclease activity; F:ATP binding; F:ATP hydrolysis activity	EC:3.6.1; EC:3.1	Acting on acid anhydrides; Acting on ester bonds	Coil (COILS); IPR038729 (PFAM); IPR027417 (G3DSA:3.40.50.GENE3D); IPR003959 (PFAM); PTHR43581 (PANTHER); IPR027417 (SUPERFAMILY)	F:GO:0005524; F:GO:0016887	F:ATP binding; F:ATP hydrolysis activity
WP_003092734.1	MULTISPECIES: D-alanyl-D-alanine dipeptidase [Pseudomonas]	10	3	5	3	28.3	160	3	0	3	Yes	1.07415	0.4648		1.5909	0.00257654	Up	1.43401	0.00898711											M	P:GO:0006508; P:GO:0071555; F:GO:0008237; F:GO:0008270; F:GO:0016805	P:proteolysis; P:cell wall organization; F:metallopeptidase activity; F:zinc ion binding; F:dipeptidase activity	EC:3.4.13	Acting on peptide bonds (peptidases)	IPR000755 (PIRSF); IPR009045 (G3DSA:3.30.1380.GENE3D); IPR000755 (PFAM); PTHR43645:SF3 (PANTHER); PTHR43645 (PANTHER); IPR000755 (HAMAP); cd14843 (CDD); IPR009045 (SUPERFAMILY)	P:GO:0006508; F:GO:0008237; F:GO:0016805	P:proteolysis; F:metallopeptidase activity; F:dipeptidase activity
WP_023465018.1	2-C-methyl-D-erythritol 2,4-cyclodiphosphate synthase [Pseudomonas aeruginosa]	49	6	19	6	16.7	698	6	0	6	Yes	-1.01534	0.693366		1.49571	0.00030632	Up	1.43289	0.000218325		-1.56196	0.000162916	Lower	PA3627	ygbB	2C-methyl-D-erythritol 2,4-cyclodiphosphate synthase	ygbB	-1.13836	0.111588	I	P:GO:0006744; P:GO:0016114; P:GO:0019288; F:GO:0008270; F:GO:0008685; F:GO:0030145; F:GO:0042802	P:ubiquinone biosynthetic process; P:terpenoid biosynthetic process; P:isopentenyl diphosphate biosynthetic process, methylerythritol 4-phosphate pathway; F:zinc ion binding; F:2-C-methyl-D-erythritol 2,4-cyclodiphosphate synthase activity; F:manganese ion binding; F:identical protein binding	EC:4.6.1.12	2-C-methyl-D-erythritol 2,4-cyclodiphosphate synthase	IPR003526 (TIGRFAM); IPR003526 (PFAM); IPR036571 (G3DSA:3.30.1330.GENE3D); IPR003526 (PANTHER); IPR020555 (PROSITE_PATTERNS); IPR003526 (HAMAP); IPR003526 (CDD); IPR036571 (SUPERFAMILY)	P:GO:0016114; F:GO:0008685	P:terpenoid biosynthetic process; F:2-C-methyl-D-erythritol 2,4-cyclodiphosphate synthase activity
WP_003087958.1	MULTISPECIES: DNA polymerase III subunit epsilon [Pseudomonas]	25	5	9	5	26.8	242	5	0	5	Yes	-1.04909	0.0600719		-1.07051	0.149182		1.43133	1.63782e-06		1.43034	0.0202828		PA1816	dnaQ	DNA polymerase III, epsilon chain	dnaQ	1.12309	0.225936	L	P:GO:0045004; P:GO:0071897; P:GO:0090305; F:GO:0003677; F:GO:0003887; F:GO:0008408; F:GO:0046872; C:GO:0005829; C:GO:0044776	P:DNA replication proofreading; P:DNA biosynthetic process; P:nucleic acid phosphodiester bond hydrolysis; F:DNA binding; F:DNA-directed DNA polymerase activity; F:3'-5' exonuclease activity; F:metal ion binding; C:cytosol; C:DNA polymerase III, core complex	EC:3.1; EC:2.7.7.7	Acting on ester bonds; DNA-directed DNA polymerase	IPR013520 (PFAM); IPR036397 (G3DSA:3.30.420.GENE3D); IPR006054 (TIGRFAM); IPR006309 (TIGRFAM); PTHR30231 (PANTHER); PTHR30231:SF32 (PANTHER); IPR006309 (CDD); IPR012337 (SUPERFAMILY)	P:GO:0006260; F:GO:0003676; F:GO:0003677; F:GO:0003887	P:DNA replication; F:nucleic acid binding; F:DNA binding; F:DNA-directed DNA polymerase activity
WP_003082358.1	MULTISPECIES: ribonucleoside-diphosphate reductase subunit alpha [Pseudomonas]	37	28	134	28	107	4591	28	0	28	Yes	1.03652	0.0889976		-1.09956	0.00493971		1.43072	1.49627e-06		1.66168	1.39226e-06	Higher	PA1156	nrdA	NrdA, catalytic component of class Ia ribonucleotide reductase	nrdA	-1.03716	0.818988	F	P:GO:0006260; P:GO:0009263; F:GO:0004748; F:GO:0005524; F:GO:0042802; C:GO:0005971	P:DNA replication; P:deoxyribonucleotide biosynthetic process; F:ribonucleoside-diphosphate reductase activity, thioredoxin disulfide as acceptor; F:ATP binding; F:identical protein binding; C:ribonucleoside-diphosphate reductase complex	EC:1.17.4.1	Ribonucleoside-diphosphate reductase	IPR000788 (PRINTS); IPR005144 (PFAM); IPR013346 (TIGRFAM); IPR000788 (PFAM); G3DSA:3.20.70.20 (GENE3D); IPR013509 (PFAM); mobidb-lite (MOBIDB_LITE); mobidb-lite (MOBIDB_LITE); PTHR11573:SF6 (PANTHER); IPR039718 (PANTHER); IPR000788 (PROSITE_PATTERNS); IPR005144 (PROSITE_PROFILES); IPR005144 (PROSITE_PROFILES); cd01679 (CDD); IPR008926 (SUPERFAMILY); SSF51998 (SUPERFAMILY)	P:GO:0006260; F:GO:0004748; F:GO:0005524	P:DNA replication; F:ribonucleoside-diphosphate reductase activity, thioredoxin disulfide as acceptor; F:ATP binding
WP_003090505.1	MULTISPECIES: 6-carboxytetrahydropterin synthase QueD [Pseudomonas]	30	3	4	3	13.8	67	3	0	3	Yes	-1.09336	0.948784		1.24665	0.519493		1.42962	0.233619		0.975256	0.739308		PA2666		probable 6-pyruvoyl tetrahydrobiopterin synthase	PA2666	-1.20921	0.0315238	H	P:GO:0008616; F:GO:0008270; F:GO:0042802; F:GO:0070497	P:queuosine biosynthetic process; F:zinc ion binding; F:identical protein binding; F:6-carboxy-5,6,7,8-tetrahydropterin synthase activity	EC:4.2.1; EC:4.1.2.50	Carbon-oxygen lyases; 6-carboxytetrahydropterin synthase	IPR007115 (TIGRFAM); IPR007115 (PIRSF); IPR007115 (PFAM); IPR038418 (G3DSA:3.30.479.GENE3D); PTHR12589:SF7 (PANTHER); IPR007115 (PANTHER); SSF55620 (SUPERFAMILY)	no GO terms	no GO terms
WP_003113500.1	MULTISPECIES: acetyl-CoA acetyltransferase [Pseudomonas]	60	16	137	16	40.4	5932	16	0	16	Yes	1.05652	0.094419		1.34592	2.22167e-05		1.42935	7.91058e-06		1.09654	0.0151018		PA2001	atoB	acetyl-CoA acetyltransferase	atoB	1.46534	0.0818429	I	P:GO:0006635; F:GO:0003985; C:GO:0005737	P:fatty acid beta-oxidation; F:acetyl-CoA C-acetyltransferase activity; C:cytoplasm	EC:2.3.1.16; EC:2.3.1.9	Acetyl-CoA C-acyltransferase; Acetyl-CoA C-acetyltransferase	IPR020617 (PFAM); IPR002155 (TIGRFAM); IPR002155 (PIRSF); IPR016039 (G3DSA:3.40.47.GENE3D); IPR016039 (G3DSA:3.40.47.GENE3D); IPR020616 (PFAM); PTHR18919:SF144 (PANTHER); PTHR18919 (PANTHER); IPR020610 (PROSITE_PATTERNS); IPR020615 (PROSITE_PATTERNS); IPR020613 (PROSITE_PATTERNS); IPR002155 (CDD); IPR016039 (SUPERFAMILY); IPR016039 (SUPERFAMILY)	F:GO:0016746; F:GO:0016747	F:acyltransferase activity; F:acyltransferase activity, transferring groups other than amino-acyl groups
WP_003093747.1	MULTISPECIES: 50S ribosomal protein L7/L12 [Pseudomonas]	57	5	42	5	12.5	1072	5	0	5	Yes	1.07111	0.0345014		1.17749	0.000803394		1.42933	2.00582e-05		1.44012	0.00136494		PA4271	rplL	50S ribosomal protein L7 / L12	rplL	2.74577	0.00809837	J	P:GO:0006412; F:GO:0003735	P:translation; F:structural constituent of ribosome			Coil (COILS); IPR014719 (G3DSA:3.30.1390.GENE3D); IPR000206 (TIGRFAM); IPR036235 (G3DSA:1.20.5.GENE3D); IPR013823 (PFAM); IPR008932 (PFAM); IPR000206 (PANTHER); PTHR45987:SF16 (PANTHER); IPR000206 (HAMAP); IPR000206 (CDD); IPR014719 (SUPERFAMILY); IPR036235 (SUPERFAMILY)	P:GO:0006412; F:GO:0003735; C:GO:0005840	P:translation; F:structural constituent of ribosome; C:ribosome
WP_016562081.1	MULTISPECIES: CobW [Pseudomonas]	15	6	22	6	41.2	753	6	0	6	Yes	-1.03035	0.235552		1.09565	0.0455099		1.42777	2.30141e-06		1.2992	0.00208736		PA2945		conserved hypothetical protein	PA2945	1.06368	0.347905	S	P:GO:0006779; P:GO:0009236; F:GO:0005524	P:porphyrin-containing compound biosynthetic process; P:cobalamin biosynthetic process; F:ATP binding			IPR036627 (G3DSA:3.30.1220.GENE3D); IPR012824 (TIGRFAM); IPR003495 (PFAM); IPR011629 (PFAM); IPR027417 (G3DSA:3.40.50.GENE3D); mobidb-lite (MOBIDB_LITE); mobidb-lite (MOBIDB_LITE); mobidb-lite (MOBIDB_LITE); PTHR13748 (PANTHER); PTHR13748:SF62 (PANTHER); cd03112 (CDD); SSF90002 (SUPERFAMILY); IPR027417 (SUPERFAMILY)	P:GO:0009236	P:cobalamin biosynthetic process
WP_003102224.1	MULTISPECIES: methyl-accepting chemotaxis protein [Pseudomonas]	38	19	44	19	72.6	1721	19	0	19	Yes	1.00413	0.905256		1.69453	0.000177664	Up	1.42621	0.00306536		-16.5686	1.32896e-09	Lower	PA0176		aerotaxis transducer Aer2				NT	P:GO:0007165; P:GO:0052131; F:GO:0004888; F:GO:0042802; F:GO:0046872; C:GO:0005887	P:signal transduction; P:positive aerotaxis; F:transmembrane signaling receptor activity; F:identical protein binding; F:metal ion binding; C:integral component of plasma membrane			Coil (COILS); Coil (COILS); Coil (COILS); IPR004090 (PRINTS); G3DSA:3.30.450.20 (GENE3D); IPR041395 (PFAM); IPR004089 (PFAM); G3DSA:1.20.120.1530 (GENE3D); IPR003660 (PFAM); IPR000014 (PFAM); G3DSA:1.10.287.950 (GENE3D); mobidb-lite (MOBIDB_LITE); PTHR43531 (PANTHER); PTHR43531:SF6 (PANTHER); PTHR43531:SF6 (PANTHER); PTHR43531 (PANTHER); IPR004089 (PROSITE_PROFILES); IPR000014 (PROSITE_PROFILES);…	P:GO:0006935; P:GO:0007165; F:GO:0004888; C:GO:0016020; C:GO:0016021	P:chemotaxis; P:signal transduction; F:transmembrane signaling receptor activity; C:membrane; C:integral component of membrane
WP_023980157.1	MULTISPECIES: flavodoxin-dependent (E)-4-hydroxy-3-methylbut-2-enyl-diphosphate synthase [Pseudomonas]	51	16	51	16	39.8	1743	16	0	16	Yes	1.01314	0.503167		1.15888	0.00116334		1.42611	1.56284e-06					PA3803	gcpE	probable isoprenoid biosynthetic protein GcpE	gcpE	1.22587	0.222511	I	P:GO:0016114; P:GO:0019288; F:GO:0005506; F:GO:0046429; F:GO:0051539; C:GO:0005829	P:terpenoid biosynthetic process; P:isopentenyl diphosphate biosynthetic process, methylerythritol 4-phosphate pathway; F:iron ion binding; F:4-hydroxy-3-methylbut-2-en-1-yl diphosphate synthase activity; F:4 iron, 4 sulfur cluster binding; C:cytosol	EC:1.17.7.1	(E)-4-hydroxy-3-methylbut-2-enyl-diphosphate synthase (ferredoxin)	Coil (COILS); IPR045854 (G3DSA:3.30.413.GENE3D); IPR016425 (PIRSF); IPR011005 (G3DSA:3.20.20.GENE3D); IPR004588 (PFAM); IPR004588 (TIGRFAM); IPR004588 (PANTHER); IPR004588 (HAMAP); IPR045854 (SUPERFAMILY); IPR011005 (SUPERFAMILY)	P:GO:0008299; P:GO:0016114; P:GO:0044237; F:GO:0005506; F:GO:0046429	P:isoprenoid biosynthetic process; P:terpenoid biosynthetic process; P:cellular metabolic process; F:iron ion binding; F:4-hydroxy-3-methylbut-2-en-1-yl diphosphate synthase activity
WP_031637128.1	NAD-dependent dehydratase [Pseudomonas aeruginosa]	26	7	13	7	33.3	492	7	0	7	Yes	-1.01574	0.762998		1.24259	0.0288046		1.42588	0.00026621		-1.64353	4.16728e-05	Lower	PA4068		probable epimerase	PA4068	-1.02159	0.849692	M	F:GO:0003978	F:UDP-glucose 4-epimerase activity	EC:5.1.3.2	UDP-glucose 4-epimerase	G3DSA:3.40.50.720 (GENE3D); G3DSA:3.90.25.10 (GENE3D); IPR001509 (PFAM); PTHR43245 (PANTHER); PTHR43245:SF13 (PANTHER); IPR036291 (SUPERFAMILY)	F:GO:0003824	F:catalytic activity
WP_023465280.1	tRNA pseudouridine(55) synthase TruB [Pseudomonas aeruginosa]	27	8	18	8	33.4	517	8	0	8	Yes	1.0456	0.360603		1.19683	0.0135856		1.42481	0.000681408		1.13209	0.202537		PA4742	truB	tRNA pseudouridine 55 synthase	truB	-1.05209	0.758866	J	P:GO:0031119; P:GO:0034337; P:GO:1990481; F:GO:0000049; F:GO:0106029; C:GO:0005829	P:tRNA pseudouridine synthesis; P:RNA folding; P:mRNA pseudouridine synthesis; F:tRNA binding; F:tRNA pseudouridine synthase activity; C:cytosol	EC:5.4.99.12; EC:5.4.99.45; EC:5.4.99.26; EC:5.4.99.25; EC:5.4.99.28; EC:5.4.99.27; EC:5.4.99.42; EC:5.4.99.44	tRNA pseudouridine(38-40) synthase; tRNA pseudouridine(38/39) synthase; tRNA pseudouridine(65) synthase; tRNA pseudouridine(55) synthase; tRNA pseudouridine(32) synthase; tRNA pseudouridine(13) synthase; tRNA pseudouridine(31) synthase; Mitochondrial tRNA pseudouridine(27/28) synthase	IPR014780 (TIGRFAM); IPR036974 (G3DSA:2.30.130.GENE3D); G3DSA:3.30.2350.10 (GENE3D); IPR002501 (PFAM); IPR015240 (PFAM); IPR032819 (PFAM); IPR014780 (PANTHER); IPR014780 (HAMAP); IPR014780 (CDD); IPR015947 (SUPERFAMILY); IPR020103 (SUPERFAMILY)	P:GO:0001522; P:GO:0006396; P:GO:0009451; F:GO:0003723; F:GO:0009982	P:pseudouridine synthesis; P:RNA processing; P:RNA modification; F:RNA binding; F:pseudouridine synthase activity
WP_003091377.1	MULTISPECIES: type II secretion system protein GspE [Pseudomonas]	20	7	13	7	55.5	387	7	0	7	Yes	1.02832	0.483948		1.38551	0.00126206		1.42448	0.000278138		-1.31364	0.00596614		PA3103	xcpR	general secretion pathway protein E	xcpR	1.08147	0.351847	NU	P:GO:1901998; F:GO:0005524; F:GO:0019534; C:GO:0005737; C:GO:0005886; C:GO:0015627	P:toxin transport; F:ATP binding; F:toxin transmembrane transporter activity; C:cytoplasm; C:plasma membrane; C:type II protein secretion system complex	EC:7	Translocases	IPR027417 (G3DSA:3.40.50.GENE3D); IPR001482 (PFAM); G3DSA:3.30.450.90 (GENE3D); IPR037257 (G3DSA:3.30.300.GENE3D); IPR013369 (TIGRFAM); PTHR30258:SF2 (PANTHER); PTHR30258 (PANTHER); IPR001482 (PROSITE_PATTERNS); cd01129 (CDD); IPR037257 (SUPERFAMILY); IPR027417 (SUPERFAMILY)	P:GO:0015628; F:GO:0005524; C:GO:0015627	P:protein secretion by the type II secretion system; F:ATP binding; C:type II protein secretion system complex
WP_003093736.1	MULTISPECIES: 50S ribosomal protein L23 [Pseudomonas]	60	6	59	6	10.9	1360	6	0	6	Yes	-1.06684	0.270191		-1.1124	0.0989276		1.42323	0.00167623		1.15503	0.0467997		PA4261	rplW	50S ribosomal protein L23	rplW	2.29487	0.00606846	J	P:GO:0000027; P:GO:0006412; F:GO:0003735; F:GO:0019843; C:GO:0005886	P:ribosomal large subunit assembly; P:translation; F:structural constituent of ribosome; F:rRNA binding; C:plasma membrane			IPR013025 (PFAM); IPR012677 (G3DSA:3.30.70.GENE3D); IPR013025 (PANTHER); PTHR11620:SF2 (PANTHER); IPR013025 (HAMAP); IPR012678 (SUPERFAMILY)	P:GO:0006412; F:GO:0003735; C:GO:0005840	P:translation; F:structural constituent of ribosome; C:ribosome
WP_003102235.1	MULTISPECIES: hypothetical protein [Pseudomonas]	25	5	11	5	32.4	296	5	0	5	Yes	-1.10916	0.251774		1.34884	0.010176		1.42104	0.00622739		1.35758	0.0152409		PA4775		hypothetical protein	PA4775	1.50162	0.126398						no IPS match	no IPS match	no IPS match
WP_003096478.1	MULTISPECIES: hypothetical protein [Bacteria]	67	6	21	6	9.5	606	6	0	6	Yes	1.04243	0.23347		1.45025	0.000634149		1.42068	4.91381e-06		-1.14132	0.00274655		PA5289		hypothetical protein	PA5289	-1.08265	0.486836	S	C:GO:0005829	C:cytosol			Coil (COILS); IPR007475 (PFAM); IPR007475 (PANTHER); IPR007475 (HAMAP)	no GO terms	no GO terms
WP_003093672.1	MULTISPECIES: 50S ribosomal protein L17 [Pseudomonas]	47	5	54	5	14.5	1365	5	0	5	Yes	-1.01926	0.69269		-1.09293	0.0646514		1.42044	0.00018349		1.26797	0.00130141		PA4237	rplQ	50S ribosomal protein L17	rplQ	2.04347	0.0149638	J	P:GO:0000027; P:GO:0006412; F:GO:0003735	P:ribosomal large subunit assembly; P:translation; F:structural constituent of ribosome			IPR036373 (G3DSA:3.90.1030.GENE3D); IPR000456 (TIGRFAM); IPR000456 (PFAM); IPR000456 (PANTHER); PTHR14413:SF16 (PANTHER); IPR000456 (PROSITE_PATTERNS); IPR000456 (HAMAP); IPR036373 (SUPERFAMILY)	P:GO:0006412; F:GO:0003735; C:GO:0005840	P:translation; F:structural constituent of ribosome; C:ribosome
WP_023465008.1	UDP-4-amino-4-deoxy-L-arabinose aminotransferase [Pseudomonas aeruginosa]	41	13	47	13	41.8	1526	13	0	13	Yes	1.01111	0.65431		1.26278	0.000253582		1.41778	2.81678e-05					PA3552	arnB	ArnB	arnB	1.15138	0.249884	M	P:GO:0009103; P:GO:0009245; P:GO:0046677; F:GO:0030170; F:GO:0099620	P:lipopolysaccharide biosynthetic process; P:lipid A biosynthetic process; P:response to antibiotic; F:pyridoxal phosphate binding; F:UDP-4-amino-4-deoxy-L-arabinose aminotransferase	EC:2.6.1.87	UDP-4-amino-4-deoxy-L-arabinose aminotransferase	IPR000653 (PFAM); IPR000653 (PIRSF); IPR015421 (G3DSA:3.40.640.GENE3D); IPR015422 (G3DSA:3.90.1150.GENE3D); IPR000653 (PANTHER); PTHR30244:SF3 (PANTHER); IPR022850 (HAMAP); IPR000653 (CDD); IPR015424 (SUPERFAMILY)	F:GO:0003824; F:GO:0008483	F:catalytic activity; F:transaminase activity
WP_003119890.1	MULTISPECIES: response regulator [Pseudomonas]	32	8	26	8	43.5	1021	8	0	8	Yes	1.10155	0.373623		1.46772	0.0336945		1.41493	0.0244585		-1.55212	0.0125718	Lower	PA2798		probable two-component response regulator	PA2798	-1.10669	0.442472	KT	P:GO:0000160; P:GO:0045893; F:GO:0000156; F:GO:0000976; F:GO:0001216; F:GO:0016791; C:GO:0005829; C:GO:0032993	P:phosphorelay signal transduction system; P:positive regulation of transcription, DNA-templated; F:phosphorelay response regulator activity; F:transcription cis-regulatory region binding; F:DNA-binding transcription activator activity; F:phosphatase activity; C:cytosol; C:protein-DNA complex	EC:3.1.3	Acting on ester bonds	Coil (COILS); IPR001789 (PFAM); G3DSA:3.40.50.2300 (GENE3D); IPR001932 (PFAM); IPR036457 (G3DSA:3.60.40.GENE3D); IPR039420 (PANTHER); PTHR48111:SF50 (PANTHER); IPR001789 (PROSITE_PROFILES); cd17555 (CDD); IPR011006 (SUPERFAMILY)	P:GO:0000160; F:GO:0016791	P:phosphorelay signal transduction system; F:phosphatase activity
WP_003122823.1	MULTISPECIES: prolyl-tRNA synthetase associated domain-containing protein [Pseudomonas]	28	4	6	4	18.7	180	4	0	4	Yes	1.04482	0.669904		1.14665	0.16021		1.41448	0.0100618		2.00799	0.000685182	Higher	PA1841		hypothetical protein	PA1841	1.03221	0.732581	S	P:GO:0106074; F:GO:0002161; F:GO:0004812	P:aminoacyl-tRNA metabolism involved in translational fidelity; F:aminoacyl-tRNA editing activity; F:aminoacyl-tRNA ligase activity	EC:6.1.1; EC:3.1.1.1	Forming carbon-oxygen bonds; Carboxylesterase	IPR007214 (PFAM); IPR036754 (G3DSA:3.90.960.GENE3D); IPR040285 (PANTHER); PTHR31423:SF3 (PANTHER); cd04335 (CDD); IPR036754 (SUPERFAMILY)	F:GO:0002161	F:aminoacyl-tRNA editing activity
WP_023465428.1	pyridoxal kinase PdxY [Pseudomonas aeruginosa]	16	4	9	4	31.4	312	4	0	4	Yes	-1.00544	0.794793		1.18241	5.40958e-05		1.4138	4.36963e-05											H	P:GO:0006805; P:GO:0009443; P:GO:0016310; P:GO:0042817; F:GO:0000287; F:GO:0005524; F:GO:0008478; F:GO:0042802; C:GO:0005829	P:xenobiotic metabolic process; P:pyridoxal 5'-phosphate salvage; P:phosphorylation; P:pyridoxal metabolic process; F:magnesium ion binding; F:ATP binding; F:pyridoxal kinase activity; F:identical protein binding; C:cytosol	EC:2.7.1.35	Pyridoxal kinase	IPR004625 (TIGRFAM); IPR013749 (PFAM); IPR029056 (G3DSA:3.40.1190.GENE3D); IPR004625 (PANTHER); IPR023685 (HAMAP); IPR004625 (CDD); IPR029056 (SUPERFAMILY)	P:GO:0009443; F:GO:0008478	P:pyridoxal 5'-phosphate salvage; F:pyridoxal kinase activity
WP_003103877.1	MULTISPECIES: 50S ribosomal protein L3 [Pseudomonas]	69	12	69	12	22.6	1814	12	0	12	Yes	-1.03091	0.140348		-1.09653	0.0124513		1.41328	2.32938e-06		1.19505	0.00597518		PA4263	rplC	50S ribosomal protein L3	rplC	1.67542	0.0688988	J	P:GO:0000027; P:GO:0006412; P:GO:0010628; P:GO:0090070; P:GO:2000234; F:GO:0003735; F:GO:0019843; C:GO:0005886	P:ribosomal large subunit assembly; P:translation; P:positive regulation of gene expression; P:positive regulation of ribosome biogenesis; P:positive regulation of rRNA processing; F:structural constituent of ribosome; F:rRNA binding; C:plasma membrane			IPR000597 (PFAM); G3DSA:2.40.30.10 (GENE3D); IPR019927 (TIGRFAM); G3DSA:3.30.160.810 (GENE3D); IPR019927 (PANTHER); PTHR11229:SF16 (PANTHER); IPR019926 (PROSITE_PATTERNS); IPR019927 (HAMAP); IPR009000 (SUPERFAMILY)	P:GO:0006412; F:GO:0003735; C:GO:0005840	P:translation; F:structural constituent of ribosome; C:ribosome
WP_003122257.1	MULTISPECIES: polysaccharide biosynthesis protein [Pseudomonas]	29	14	29	14	74.3	727	14	0	14	Yes	-1.0261	0.620303		1.10252	0.0842083		1.41236	0.00113959					PA3141	wbpM	nucleotide sugar epimerase/dehydratase WbpM	wbpM	1.06117	0.392066	GM	C:GO:0016021	C:integral component of membrane			PF13727 (PFAM); G3DSA:3.40.50.720 (GENE3D); G3DSA:3.40.50.720 (GENE3D); IPR003869 (PFAM); PTHR43318 (PANTHER); PTHR43318:SF1 (PANTHER); IPR003869 (CDD); IPR029063 (SUPERFAMILY); IPR036291 (SUPERFAMILY)	no GO terms	no GO terms
WP_003086270.1	MULTISPECIES: 4-hydroxy-tetrahydrodipicolinate synthase [Pseudomonas]	61	14	62	14	31.4	1645	14	0	14	Yes	1.00284	0.91972		1.30675	0.00015809		1.41146	0.000146719		1.08967	0.273745		PA1010	dapA	dihydrodipicolinate synthase	dapA	-1.16722	0.139276	E	P:GO:0009089; P:GO:0019877; F:GO:0008840; F:GO:0042802; C:GO:0005829	P:lysine biosynthetic process via diaminopimelate; P:diaminopimelate biosynthetic process; F:4-hydroxy-tetrahydrodipicolinate synthase activity; F:identical protein binding; C:cytosol	EC:4.2.1; EC:4.3.3.7	Carbon-oxygen lyases; 4-hydroxy-tetrahydrodipicolinate synthase	Coil (COILS); IPR002220 (PRINTS); IPR002220 (PFAM); IPR002220 (PIRSF); IPR005263 (TIGRFAM); IPR013785 (G3DSA:3.20.20.GENE3D); PTHR12128:SF15 (PANTHER); IPR002220 (PANTHER); IPR020625 (PROSITE_PATTERNS); IPR020624 (PROSITE_PATTERNS); IPR005263 (HAMAP); IPR005263 (CDD); SSF51569 (SUPERFAMILY)	P:GO:0009089; F:GO:0003824; F:GO:0008840; F:GO:0016829	P:lysine biosynthetic process via diaminopimelate; F:catalytic activity; F:4-hydroxy-tetrahydrodipicolinate synthase activity; F:lyase activity
WP_023464178.1	type VI secretion system ATPase TssH [Pseudomonas aeruginosa]	14	12	17	11	98.7	448	12	0	11	Yes	1.03413	0.967607		1.19524	0.765714		1.41111	0.733971		-14.1706	6.8305e-05	Lower	PA0090	clpV1	ClpV1	clpV1	3.56148	5.89e-09	O	P:GO:0019538; F:GO:0005524; F:GO:0016887	P:protein metabolic process; F:ATP binding; F:ATP hydrolysis activity	EC:3.6.1	Acting on acid anhydrides	Coil (COILS); Coil (COILS); Coil (COILS); IPR001270 (PRINTS); IPR003959 (PFAM); IPR036628 (G3DSA:1.10.1780.GENE3D); G3DSA:1.10.8.60 (GENE3D); IPR027417 (G3DSA:3.40.50.GENE3D); IPR019489 (PFAM); IPR041546 (PFAM); IPR003959 (PFAM); IPR017729 (TIGRFAM); IPR027417 (G3DSA:3.40.50.GENE3D); IPR027417 (G3DSA:3.40.50.GENE3D); mobidb-lite (MOBIDB_LITE); PTHR43572 (PANTHER); PTHR43572:SF60 (PANTHER); IPR018…	F:GO:0005524; F:GO:0016887	F:ATP binding; F:ATP hydrolysis activity
WP_003096556.1	MULTISPECIES: 50S ribosomal protein L28 [Bacteria]	60	5	32	5	9.1	832	5	0	5	Yes	-1.00679	0.966051		-1.07639	0.408485		1.41104	0.00775706		1.07552	0.405412		PA5316	rpmB	50S ribosomal protein L28	rpmB	1.9408	0.0199977	J	P:GO:0000027; P:GO:0006412; F:GO:0003735	P:ribosomal large subunit assembly; P:translation; F:structural constituent of ribosome			IPR037147 (G3DSA:2.30.170.GENE3D); IPR026569 (PFAM); IPR001383 (TIGRFAM); IPR026569 (PANTHER); PTHR13528:SF10 (PANTHER); IPR001383 (HAMAP); IPR034704 (SUPERFAMILY)	P:GO:0006412; F:GO:0003735; C:GO:0005840	P:translation; F:structural constituent of ribosome; C:ribosome
WP_003084386.1	MULTISPECIES: ribose-5-phosphate isomerase [Pseudomonas]	39	7	22	7	23.7	615	7	0	7	Yes	1.05001	0.108658		1.2927	6.31283e-05		1.40949	2.00371e-05		1.10175	0.0341441		PA0330	rpiA	ribose 5-phosphate isomerase	rpiA	-1.19571	0.0613505	G	P:GO:0006014; P:GO:0009052; F:GO:0004751; F:GO:0042802; C:GO:0005829	P:D-ribose metabolic process; P:pentose-phosphate shunt, non-oxidative branch; F:ribose-5-phosphate isomerase activity; F:identical protein binding; C:cytosol	EC:5.3.1.6	Ribose-5-phosphate isomerase	IPR004788 (TIGRFAM); G3DSA:3.30.70.260 (GENE3D); IPR004788 (PFAM); G3DSA:3.40.50.1360 (GENE3D); IPR004788 (PANTHER); IPR020672 (HAMAP); IPR004788 (CDD); SSF75445 (SUPERFAMILY); IPR037171 (SUPERFAMILY)	P:GO:0009052; F:GO:0004751	P:pentose-phosphate shunt, non-oxidative branch; F:ribose-5-phosphate isomerase activity
WP_003096050.1	MULTISPECIES: protein-export protein SecB [Pseudomonas]	39	5	38	5	18.1	1139	5	0	5	Yes	1.0569	0.0346355		1.21126	0.00103419		1.40769	7.33454e-06		-1.15466	0.0245814		PA5128	secB	secretion protein SecB	secB	1.25948	0.157051	U	P:GO:0006457; P:GO:0006605; P:GO:0015833; P:GO:0043952; P:GO:0051262; F:GO:0051082; C:GO:0005829	P:protein folding; P:protein targeting; P:peptide transport; P:protein transport by the Sec complex; P:protein tetramerization; F:unfolded protein binding; C:cytosol			IPR003708 (PRINTS); IPR035958 (G3DSA:3.10.420.GENE3D); IPR003708 (PFAM); IPR003708 (TIGRFAM); IPR003708 (PANTHER); IPR003708 (HAMAP); IPR035958 (SUPERFAMILY)	P:GO:0015031; P:GO:0051262; F:GO:0051082	P:protein transport; P:protein tetramerization; F:unfolded protein binding
WP_023464441.1	mucoidy inhibitor MuiA [Pseudomonas aeruginosa]	43	22	49	22	60.6	1456	22	0	22	Yes	-1.04628	0.18091		1.23386	0.00120808		1.40722	6.25933e-05		-5.67158	6.15497e-09	Lower	PA1494	muiA	mucoidy inhibitor gene A	PA1494	1.22232	0.284787	S					Coil (COILS); Coil (COILS); IPR011935 (TIGRFAM); IPR025554 (PFAM); G3DSA:2.60.40.2960 (GENE3D); IPR037291 (PFAM); PTHR31005:SF8 (PANTHER); IPR011935 (PANTHER)	no GO terms	no GO terms
WP_003118964.1	MULTISPECIES: hypothetical protein [Pseudomonas]	9	2	7	2	34.7	339	2	0	2	Yes	1.18636	0.00533043		1.33965	0.000270274		1.40648	0.000326358		-1.95797	0.000138573	Lower	PA1889		hypothetical protein	PA1889	1.07485	0.575019						no IPS match	no IPS match	no IPS match
WP_003123645.1	MULTISPECIES: hypothetical protein [Pseudomonas]	32	13	26	13	47.3	763	13	0	13	Yes	1.08104	0.00809417		1.51109	7.04162e-06	Up	1.4058	1.50345e-05		1.66634	2.65551e-05	Higher	PA5133		conserved hypothetical protein	PA5133	-1.02125	0.841367	D	P:GO:0000920; P:GO:0001896; P:GO:0006508; P:GO:0009314; P:GO:0009410; P:GO:0051345; F:GO:0004222; C:GO:0005886; C:GO:0030288; C:GO:0032153	P:septum digestion after cytokinesis; P:autolysis; P:proteolysis; P:response to radiation; P:response to xenobiotic stimulus; P:positive regulation of hydrolase activity; F:metalloendopeptidase activity; C:plasma membrane; C:outer membrane-bounded periplasmic space; C:cell division site	EC:3.4.24	Acting on peptide bonds (peptidases)	Coil (COILS); Coil (COILS); Coil (COILS); G3DSA:6.10.250.3150 (GENE3D); IPR011055 (G3DSA:2.70.70.GENE3D); IPR016047 (PFAM); mobidb-lite (MOBIDB_LITE); mobidb-lite (MOBIDB_LITE); mobidb-lite (MOBIDB_LITE); mobidb-lite (MOBIDB_LITE); PTHR21666 (PANTHER); PTHR21666:SF265 (PANTHER); IPR011055 (SUPERFAMILY)	no GO terms	no GO terms
WP_003096624.1	MULTISPECIES: ATP-dependent DNA helicase RecG [Pseudomonas]	23	13	25	13	76.1	776	13	0	13	Yes	1.01918	0.629428		1.31469	0.0011312		1.40276	0.000480147		1.26868	0.0136382		PA5345	recG	ATP-dependent DNA helicase RecG	recG	1.02423	0.732876	L	P:GO:0006281; P:GO:0006310; P:GO:0032508; P:GO:0034599; P:GO:0034644; P:GO:0071247; P:GO:0072715; F:GO:0000976; F:GO:0003724; F:GO:0005524; F:GO:0009378; F:GO:0016887; C:GO:0005829; C:GO:0005886; C:GO:0009379; C:GO:0048476	P:DNA repair; P:DNA recombination; P:DNA duplex unwinding; P:cellular response to oxidative stress; P:cellular response to UV; P:cellular response to chromate; P:cellular response to selenite ion; F:transcription cis-regulatory region binding; F:RNA helicase activity; F:ATP binding; F:four-way junction helicase activity; F:ATP hydrolysis activity; C:cytosol; C:plasma membrane; C:Holliday junction…	EC:3.6.1; EC:3.6.4.12; EC:3.6.4.13	Acting on acid anhydrides; DNA helicase; RNA helicase	IPR004609 (TIGRFAM); IPR027417 (G3DSA:3.40.50.GENE3D); IPR027417 (G3DSA:3.40.50.GENE3D); G3DSA:2.40.50.140 (GENE3D); IPR001650 (PFAM); IPR011545 (PFAM); IPR033454 (PFAM); IPR045562 (PFAM); PTHR47964 (PANTHER); IPR001650 (PROSITE_PROFILES); IPR014001 (PROSITE_PROFILES); cd17992 (CDD); cd04488 (CDD); IPR027417 (SUPERFAMILY); IPR012340 (SUPERFAMILY)	P:GO:0006281; P:GO:0006310; F:GO:0003676; F:GO:0003678; F:GO:0005524	P:DNA repair; P:DNA recombination; F:nucleic acid binding; F:DNA helicase activity; F:ATP binding
WP_003105021.1	MULTISPECIES: alpha/beta hydrolase [Pseudomonas]	18	2	4	2	23.4	64	2	0	2	Yes	1.80592	0.24378		1.33836	0.215877		1.40182	0.23757		0.909185	0.587885		PA3859		carboxylesterase	PA3859	-1.06506	0.546213	S	F:GO:0080030	F:methyl indole-3-acetate esterase activity	EC:3.1.1.1	Carboxylesterase	IPR029058 (G3DSA:3.40.50.GENE3D); IPR003140 (PFAM); PTHR10655:SF17 (PANTHER); PTHR10655 (PANTHER); IPR029058 (SUPERFAMILY)	F:GO:0016787	F:hydrolase activity
WP_003119867.1	MULTISPECIES: arylesterase [Pseudomonas]	30	5	14	5	21	537	5	0	5	Yes	-1.08487	0.243809		1.41394	0.000404564		1.40132	0.0029156		2.03066	0.00169318	Higher	PA2856	tesA	lysophospholipase A	tesA	-1.02552	0.711293	E	P:GO:0006508; F:GO:0004064; F:GO:0004622; F:GO:0008233; F:GO:0016290; F:GO:0042802; F:GO:0080030; C:GO:0005576; C:GO:0030288	P:proteolysis; F:arylesterase activity; F:lysophospholipase activity; F:peptidase activity; F:palmitoyl-CoA hydrolase activity; F:identical protein binding; F:methyl indole-3-acetate esterase activity; C:extracellular region; C:outer membrane-bounded periplasmic space	EC:3.4; EC:3.1.1.5; EC:3.1.2.20; EC:3.1.1.2; EC:3.1.1.1	Acting on peptide bonds (peptidases); Lysophospholipase; Acyl-CoA hydrolase; Arylesterase; Carboxylesterase	IPR036514 (G3DSA:3.40.50.GENE3D); IPR013830 (PFAM); PTHR30383 (PANTHER); PTHR30383:SF24 (PANTHER); cd01822 (CDD); SSF52266 (SUPERFAMILY)	no GO terms	no GO terms
WP_009876639.1	sulfurtransferase [Pseudomonas aeruginosa]	14	6	8	6	57.2	251	6	0	6	Yes	-1.05355	0.343247		1.07938	0.583447		1.4011	0.468131		0.782172	0.196765		PA2603		probable thiosulfate sulfurtransferase				P	F:GO:0004792	F:thiosulfate sulfurtransferase activity	EC:2.8.1.1	Thiosulfate sulfurtransferase	Coil (COILS); IPR001763 (PFAM); IPR036873 (G3DSA:3.40.250.GENE3D); IPR036873 (G3DSA:3.40.250.GENE3D); IPR036873 (G3DSA:3.40.250.GENE3D); IPR036873 (G3DSA:3.40.250.GENE3D); PTHR43855:SF1 (PANTHER); PTHR43855:SF1 (PANTHER); PTHR43855 (PANTHER); PTHR43855 (PANTHER); IPR001307 (PROSITE_PATTERNS); IPR001763 (PROSITE_PROFILES); IPR001763 (PROSITE_PROFILES); IPR001763 (PROSITE_PROFILES); cd01533 (CDD); …	F:GO:0004792	F:thiosulfate sulfurtransferase activity
WP_110184024.1	nitrate reductase subunit alpha [Pseudomonas aeruginosa]	6	6	7	6	140.8	210	6	0	6	Yes	-1.07977	0.557755		1.24554	0.0860057		1.39769	0.027039		1.03174	0.806876		PA3875	narG	respiratory nitrate reductase alpha chain	narG	1.26363	0.0307876	C	P:GO:0009061; P:GO:0042126; F:GO:0008940; F:GO:0043546; F:GO:0046872; F:GO:0051539; C:GO:0009325; C:GO:0016020	P:anaerobic respiration; P:nitrate metabolic process; F:nitrate reductase activity; F:molybdopterin cofactor binding; F:metal ion binding; F:4 iron, 4 sulfur cluster binding; C:nitrate reductase complex; C:membrane	EC:1.7.99.4	Nitrate reductase	IPR028189 (PFAM); IPR006657 (PFAM); IPR044906 (G3DSA:4.10.1200.GENE3D); IPR006468 (TIGRFAM); IPR006656 (PFAM); G3DSA:3.40.50.12440 (GENE3D); PTHR43105 (PANTHER); PTHR43105:SF8 (PANTHER); IPR027467 (PROSITE_PATTERNS); IPR006655 (PROSITE_PATTERNS); IPR006655 (PROSITE_PATTERNS); IPR006963 (PROSITE_PROFILES); cd02750 (CDD); IPR037943 (CDD); SSF53706 (SUPERFAMILY); IPR009010 (SUPERFAMILY)	P:GO:0042126; F:GO:0008940; F:GO:0016491; F:GO:0043546; F:GO:0051539; C:GO:0009325	P:nitrate metabolic process; F:nitrate reductase activity; F:oxidoreductase activity; F:molybdopterin cofactor binding; F:4 iron, 4 sulfur cluster binding; C:nitrate reductase complex
WP_003105151.1	MULTISPECIES: bifunctional phosphoribosylaminoimidazolecarboxamide formyltransferase/inosine monophosphate cyclohydrolase [Pseudomonas]	46	21	72	21	57.6	1832	21	0	21	Yes	1.01473	0.312328		1.13521	0.000179089		1.39679	2.9344e-05		1.08198	0.000119417		PA4854	purH	phosphoribosylaminoimidazolecarboxamide formyltransferase	purH	-1.24108	0.134377	F	P:GO:0006189; F:GO:0003937; F:GO:0004643; C:GO:0005829	P:'de novo' IMP biosynthetic process; F:IMP cyclohydrolase activity; F:phosphoribosylaminoimidazolecarboxamide formyltransferase activity; C:cytosol	EC:3.5.4.10; EC:2.1.2.3	IMP cyclohydrolase; Phosphoribosylaminoimidazolecarboxamide formyltransferase	IPR002695 (PFAM); IPR036914 (G3DSA:3.40.50.GENE3D); IPR002695 (PIRSF); IPR002695 (TIGRFAM); IPR024051 (G3DSA:3.40.140.GENE3D); IPR011607 (PFAM); IPR024051 (G3DSA:3.40.140.GENE3D); PTHR11692:SF0 (PANTHER); IPR002695 (PANTHER); IPR002695 (HAMAP); IPR011607 (PROSITE_PROFILES); cd01421 (CDD); IPR016193 (SUPERFAMILY); IPR036914 (SUPERFAMILY)	P:GO:0006164; F:GO:0003824; F:GO:0003937; F:GO:0004643	P:purine nucleotide biosynthetic process; F:catalytic activity; F:IMP cyclohydrolase activity; F:phosphoribosylaminoimidazolecarboxamide formyltransferase activity
WP_110184041.1	phosphatase [Pseudomonas aeruginosa]	15	3	4	3	32.2	151	3	0	3	Yes	1.10408	0.534694		1.37994	0.124852		1.39576	0.101026					PA3200		conserved hypothetical protein	PA3200	-1.13178	0.320321	S	P:GO:0016311; P:GO:0071897; P:GO:0090357; P:GO:0090503; F:GO:0003887; F:GO:0004534; F:GO:0008252; F:GO:0030145; F:GO:0035312; F:GO:0097657	P:dephosphorylation; P:DNA biosynthetic process; P:regulation of tryptophan metabolic process; P:RNA phosphodiester bond hydrolysis, exonucleolytic; F:DNA-directed DNA polymerase activity; F:5'-3' exoribonuclease activity; F:nucleotidase activity; F:manganese ion binding; F:5'-3' exodeoxyribonuclease activity; F:3',5'-nucleotide bisphosphate phosphatase activity	EC:3.1.11; EC:3.1.13; EC:3.1.15; EC:2.7.7.7; EC:3.1.3.97	Acting on ester bonds; Acting on ester bonds; Acting on ester bonds; DNA-directed DNA polymerase; 3',5'-nucleoside bisphosphate phosphatase	G3DSA:3.20.20.140 (GENE3D); G3DSA:1.10.150.650 (GENE3D); IPR004013 (PFAM); PTHR42924 (PANTHER); PTHR42924:SF3 (PANTHER); cd07438 (CDD); IPR016195 (SUPERFAMILY)	F:GO:0003824	F:catalytic activity
WP_003103447.1	MULTISPECIES: D-aminoacyl-tRNA deacylase [Pseudomonas]	49	5	10	5	15.5	416	5	0	5	Yes	1.06485	0.469132		1.35375	0.00408697		1.39542	0.00205211		0.956201	0.877802		PA5079		conserved hypothetical protein	PA5079	1.27289	0.0265274	J	P:GO:0009408; P:GO:0019478; P:GO:0106074; F:GO:0000049; F:GO:0043908; F:GO:0051500; F:GO:0106026; C:GO:0005737	P:response to heat; P:D-amino acid catabolic process; P:aminoacyl-tRNA metabolism involved in translational fidelity; F:tRNA binding; F:Ser(Gly)-tRNA(Ala) hydrolase activity; F:D-tyrosyl-tRNA(Tyr) deacylase activity; F:Gly-tRNA(Ala) hydrolase activity; C:cytoplasm	EC:3.1.1.96; EC:3.1.1.1	D-aminoacyl-tRNA deacylase; Carboxylesterase	IPR023509 (G3DSA:3.50.80.GENE3D); IPR003732 (TIGRFAM); IPR003732 (PFAM); PTHR10472:SF5 (PANTHER); IPR003732 (PANTHER); IPR003732 (HAMAP); IPR003732 (CDD); IPR023509 (SUPERFAMILY)	F:GO:0002161; F:GO:0051499; C:GO:0005737	F:aminoacyl-tRNA editing activity; F:D-aminoacyl-tRNA deacylase activity; C:cytoplasm
WP_003115276.1	MULTISPECIES: hypothetical protein [Pseudomonas]	31	4	6	4	16.4	317	4	0	4	Yes	1.03628	0.637452		1.08089	0.272053		1.39532	0.000491716		1.06345	0.256085		PA2829		hypothetical protein	PA2829	-1.0343	0.770018						no IPS match	no IPS match	no IPS match
WP_003122228.1	MULTISPECIES: XRE family transcriptional regulator [Pseudomonas]	34	3	8	3	11	255	3	0	3	Yes	1.05429	0.481743		1.89143	0.00216201	Up	1.39466	0.00188935					PA3260		probable transcriptional regulator	PA3260	1.30422	0.0342899	K	F:GO:0003677	F:DNA binding			IPR001387 (PFAM); IPR010982 (G3DSA:1.10.260.GENE3D); IPR001387 (PROSITE_PROFILES); IPR001387 (CDD); IPR010982 (SUPERFAMILY)	F:GO:0003677	F:DNA binding
WP_003092658.1	MULTISPECIES: phosphoribosylglycinamide formyltransferase 2 [Pseudomonas]	36	13	44	13	42.3	1254	13	0	13	Yes	1.02227	0.549439		1.2054	0.00815164		1.3938	0.00107387		1.27986	0.00111638		PA3751	purT	phosphoribosylglycinamide formyltransferase 2	purT	1.19034	0.36028	F	P:GO:0006189; P:GO:0016310; F:GO:0000287; F:GO:0004644; F:GO:0005524; F:GO:0008776; F:GO:0043815; C:GO:0005829	P:'de novo' IMP biosynthetic process; P:phosphorylation; F:magnesium ion binding; F:phosphoribosylglycinamide formyltransferase activity; F:ATP binding; F:acetate kinase activity; F:phosphoribosylglycinamide formyltransferase 2 activity; C:cytosol	EC:2.1.2.2; EC:2.7.2.1	Phosphoribosylglycinamide formyltransferase 1; Acetate kinase	G3DSA:3.30.470.20 (GENE3D); IPR001509 (PFAM); IPR013815 (G3DSA:3.30.1490.GENE3D); IPR005862 (TIGRFAM); IPR003135 (PFAM); G3DSA:3.40.50.20 (GENE3D); PTHR43055 (PANTHER); IPR011761 (PROSITE_PROFILES); IPR005862 (HAMAP); IPR016185 (SUPERFAMILY); SSF56059 (SUPERFAMILY)	P:GO:0009152; F:GO:0000287; F:GO:0003824; F:GO:0004644; F:GO:0005524; F:GO:0016742; F:GO:0046872	P:purine ribonucleotide biosynthetic process; F:magnesium ion binding; F:catalytic activity; F:phosphoribosylglycinamide formyltransferase activity; F:ATP binding; F:hydroxymethyl-, formyl- and related transferase activity; F:metal ion binding
WP_031636618.1	GTP-binding protein [Pseudomonas aeruginosa]	49	10	38	10	23.2	951	10	0	10	Yes	-1.00879	0.812855		1.17374	0.0077609		1.39338	0.00107984		0.969032	0.479797		PA3801		conserved hypothetical protein	PA3801	1.50485	0.017254	S	F:GO:0005515; F:GO:0044877; C:GO:0032991; C:GO:0071575	F:protein binding; F:protein-containing complex binding; C:protein-containing complex; C:integral component of external side of plasma membrane			IPR026039 (PIRSF); IPR011990 (G3DSA:1.25.40.GENE3D); IPR018704 (PFAM); IPR026039 (PANTHER); IPR011990 (SUPERFAMILY)	F:GO:0005515; F:GO:0044877	F:protein binding; F:protein-containing complex binding
WP_003087993.1	MULTISPECIES: hypothetical protein [Pseudomonas]	52	3	22	3	11.1	671	3	0	3	Yes	-1.09177	0.29486		1.41754	0.0124256		1.3915	0.00422737		-1.15075	0.0540962		PA1830		hypothetical protein	PA1830	1.38375	0.0943472	I	C:GO:0005829	C:cytosol			IPR003033 (PFAM); IPR036527 (G3DSA:3.30.1050.GENE3D); IPR039543 (PANTHER); PTHR10094:SF25 (PANTHER); IPR036527 (SUPERFAMILY)	no GO terms	no GO terms
WP_003088573.1	MULTISPECIES: 3-hydroxybutyrate dehydrogenase [Pseudomonas]	50	9	35	9	26.7	920	9	0	9	Yes	1.08072	0.00665821		1.38056	1.05293e-05		1.39127	0.000149311		1.26855	3.15452e-05		PA2003	bdhA	3-hydroxybutyrate dehydrogenase	bdhA	-1.03198	0.891032	IQ	F:GO:0003858	F:3-hydroxybutyrate dehydrogenase activity	EC:1.1.1.30	3-hydroxybutyrate dehydrogenase	IPR002347 (PRINTS); IPR002347 (PRINTS); G3DSA:3.40.50.720 (GENE3D); IPR011294 (TIGRFAM); IPR002347 (PFAM); PTHR42879 (PANTHER); PTHR42879:SF2 (PANTHER); IPR020904 (PROSITE_PATTERNS); cd08940 (CDD); IPR036291 (SUPERFAMILY)	F:GO:0003858; F:GO:0016491	F:3-hydroxybutyrate dehydrogenase activity; F:oxidoreductase activity
WP_003113738.1	MULTISPECIES: LacI family DNA-binding transcriptional regulator [Pseudomonas]	30	9	25	9	37.4	752	9	0	9	Yes	1.01176	0.474049		1.64393	2.42079e-05	Up	1.39047	0.00203616		1.22162	0.011931		PA2259	ptxS	transcriptional regulator PtxS	ptxS	1.49984	0.0505211	K	P:GO:0045892; F:GO:0000976; F:GO:0001217; C:GO:0032993	P:negative regulation of transcription, DNA-templated; F:transcription cis-regulatory region binding; F:DNA-binding transcription repressor activity; C:protein-DNA complex			IPR001761 (PFAM); G3DSA:3.40.50.2300 (GENE3D); IPR010982 (G3DSA:1.10.260.GENE3D); G3DSA:3.40.50.2300 (GENE3D); IPR000843 (PFAM); PTHR30146 (PANTHER); PTHR30146:SF121 (PANTHER); IPR000843 (PROSITE_PROFILES); IPR000843 (CDD); cd06283 (CDD); IPR010982 (SUPERFAMILY); IPR028082 (SUPERFAMILY)	P:GO:0006355; F:GO:0003677	P:regulation of transcription, DNA-templated; F:DNA binding
WP_003093168.1	MULTISPECIES: DNA polymerase III subunit delta [Pseudomonas]	26	6	19	6	37.4	833	6	0	6	Yes	-1.05084	0.188574		-1.13261	0.00219208		1.39038	9.77196e-06		1.1313	0.00203968		PA3989	holA	DNA polymerase III, delta subunit	holA	1.31769	0.0279093	L	P:GO:0006261; P:GO:0071897; F:GO:0003677; F:GO:0003887; C:GO:0005622; C:GO:0009360	P:DNA-dependent DNA replication; P:DNA biosynthetic process; F:DNA binding; F:DNA-directed DNA polymerase activity; C:intracellular anatomical structure; C:DNA polymerase III complex	EC:2.7.7.7	DNA-directed DNA polymerase	IPR032780 (PFAM); G3DSA:1.10.8.60 (GENE3D); G3DSA:1.20.272.10 (GENE3D); IPR005790 (TIGRFAM); IPR027417 (G3DSA:3.40.50.GENE3D); IPR010372 (PFAM); PTHR34388 (PANTHER); cd18138 (CDD); IPR008921 (SUPERFAMILY); IPR027417 (SUPERFAMILY)	P:GO:0006260; F:GO:0003677; F:GO:0003887; C:GO:0009360	P:DNA replication; F:DNA binding; F:DNA-directed DNA polymerase activity; C:DNA polymerase III complex
WP_023464844.1	MULTISPECIES: hypothetical protein [Pseudomonas]	10	3	4	3	33.1	125	3	0	3	Yes	1.05143	0.351315		0.997773	0.987026		1.39036	0.00493299																Coil (COILS)	no GO terms	no GO terms
WP_003094445.1	MULTISPECIES: ABC transporter substrate-binding protein [Pseudomonas]	28	12	33	12	58.6	715	12	0	12	Yes	-1.02055	0.444926		1.96469	2.30286e-07	Up	1.38911	5.7534e-05		0.94041	0.145141		PA4502	dppA4	probable binding protein component of ABC transporter	PA4502	-1.55312	0.0243826	E	P:GO:0055085	P:transmembrane transport			G3DSA:3.10.105.10 (GENE3D); IPR030678 (PIRSF); G3DSA:3.90.76.10 (GENE3D); G3DSA:3.40.190.10 (GENE3D); IPR000914 (PFAM); PTHR30290:SF38 (PANTHER); IPR039424 (PANTHER); cd08493 (CDD); SSF53850 (SUPERFAMILY)	P:GO:0055085; C:GO:0043190	P:transmembrane transport; C:ATP-binding cassette (ABC) transporter complex
WP_003099549.1	MULTISPECIES: nucleotidyltransferase family protein [Pseudomonas]	23	3	5	3	24.1	175	3	0	3	Yes	1.00314	0.989698		1.14405	0.110776		1.38476	0.00032675		1.17803	0.0724152		PA0597		probable nucleotidyl transferase	PA0597	1.46903	0.046929	JM	P:GO:0005975; P:GO:0006040; P:GO:0008360; P:GO:0009254; P:GO:0046677; P:GO:0071555; P:GO:0097172; F:GO:0000287; F:GO:0002134; F:GO:0008879; F:GO:0032551; F:GO:0070569	P:carbohydrate metabolic process; P:amino sugar metabolic process; P:regulation of cell shape; P:peptidoglycan turnover; P:response to antibiotic; P:cell wall organization; P:N-acetylmuramic acid metabolic process; F:magnesium ion binding; F:UTP binding; F:glucose-1-phosphate thymidylyltransferase activity; F:pyrimidine ribonucleoside binding; F:uridylyltransferase activity	EC:2.7.7.24	Glucose-1-phosphate thymidylyltransferase	IPR005835 (PFAM); IPR029044 (G3DSA:3.90.550.GENE3D); PTHR43584:SF6 (PANTHER); PTHR43584 (PANTHER); cd06422 (CDD); IPR029044 (SUPERFAMILY)	P:GO:0009058; F:GO:0016779	P:biosynthetic process; F:nucleotidyltransferase activity
WP_003114783.1	MULTISPECIES: chemotaxis transducer [Pseudomonas]	28	11	21	10	56.4	844	11	0	10	Yes	1.06739	0.821842		1.25326	0.519205		1.3837	0.157715		-18.2098	0.000552186	Lower	PA2788		probable chemotaxis transducer	PA2788	-2.13417	0.000348394	NT	P:GO:0007165; C:GO:0016021	P:signal transduction; C:integral component of membrane			Coil (COILS); Coil (COILS); IPR004089 (PFAM); IPR029095 (PFAM); G3DSA:1.10.287.950 (GENE3D); PTHR32089 (PANTHER); PTHR32089:SF109 (PANTHER); PTHR32089 (PANTHER); IPR003660 (PROSITE_PROFILES); IPR004089 (PROSITE_PROFILES); IPR000727 (PROSITE_PROFILES); cd11386 (CDD); SSF58104 (SUPERFAMILY)	P:GO:0007165; C:GO:0016020; C:GO:0016021	P:signal transduction; C:membrane; C:integral component of membrane
WP_003084971.1	MULTISPECIES: M48 family peptidase [Pseudomonas]	20	4	7	4	19	88	4	0	4	Yes	-1.06973	0.17848		-1.08014	0.142325		1.38315	0.0108813		1.61213	0.000349152	Higher	PA0560		conserved hypothetical protein	PA0560	-1.1429	0.166479	S	F:GO:0016787	F:hydrolase activity	EC:3	Hydrolases	IPR002725 (PFAM); G3DSA:3.30.2010.10 (GENE3D); PTHR30399 (PANTHER); PTHR30399:SF4 (PANTHER); cd07344 (CDD)	no GO terms	no GO terms
WP_003113691.1	MULTISPECIES: NAD(P)-dependent oxidoreductase [Pseudomonas]	38	10	22	10	30.9	747	10	0	10	Yes	0.997647	0.943476		1.01882	0.562695		1.38306	0.00508433		-5.01129	2.6616e-07	Lower	PA2199		probable dehydrogenase	PA2199	1.31847	0.0158982	I	F:GO:0008679; F:GO:0050661; F:GO:0051287	F:2-hydroxy-3-oxopropionate reductase activity; F:NADP binding; F:NAD binding	EC:1.1.1.60	2-hydroxy-3-oxopropionate reductase	G3DSA:3.40.50.720 (GENE3D); IPR029154 (PFAM); IPR013328 (G3DSA:1.10.1040.GENE3D); IPR015815 (PIRSF); IPR006115 (PFAM); PTHR43580 (PANTHER); IPR002204 (PROSITE_PATTERNS); IPR036291 (SUPERFAMILY); IPR008927 (SUPERFAMILY)	F:GO:0016491; F:GO:0050661; F:GO:0051287	F:oxidoreductase activity; F:NADP binding; F:NAD binding
WP_003453637.1	MULTISPECIES: DNA polymerase III subunit alpha [Pseudomonas]	38	45	92	45	130.8	2251	45	0	45	Yes	1.00375	0.767291		-1.08243	0.028207		1.38277	0.000133326		1.30584	0.00169785		PA3640	dnaE	DNA polymerase III, alpha chain	dnaE	-1.5252	0.000968097	L	P:GO:0006260; P:GO:0071897; P:GO:0090305; F:GO:0003676; F:GO:0003887; F:GO:0008408; C:GO:0005829; C:GO:0044776	P:DNA replication; P:DNA biosynthetic process; P:nucleic acid phosphodiester bond hydrolysis; F:nucleic acid binding; F:DNA-directed DNA polymerase activity; F:3'-5' exonuclease activity; C:cytosol; C:DNA polymerase III, core complex	EC:3.1; EC:2.7.7.7	Acting on ester bonds; DNA-directed DNA polymerase	IPR011708 (PFAM); G3DSA:2.40.50.140 (GENE3D); IPR004013 (PFAM); G3DSA:3.20.20.140 (GENE3D); IPR004365 (PFAM); IPR041931 (G3DSA:1.10.10.GENE3D); IPR004805 (TIGRFAM); IPR029460 (PFAM); G3DSA:1.10.150.870 (GENE3D); IPR040982 (PFAM); PTHR32294:SF0 (PANTHER); IPR004805 (PANTHER); cd07433 (CDD); cd04485 (CDD); IPR016195 (SUPERFAMILY)	P:GO:0006260; F:GO:0003676; F:GO:0003824; F:GO:0008408	P:DNA replication; F:nucleic acid binding; F:catalytic activity; F:3'-5' exonuclease activity
WP_003084546.1	MULTISPECIES: pyrroline-5-carboxylate reductase [Pseudomonas]	25	6	27	6	28.1	919	6	0	6	Yes	1.04684	0.259554		1.40293	0.000782839		1.38149	0.000119276		0.938808	0.377059		PA0393	proC	pyrroline-5-carboxylate reductase	proC	1.29729	0.116113	E	P:GO:0055129; F:GO:0004735; C:GO:0005737	P:L-proline biosynthetic process; F:pyrroline-5-carboxylate reductase activity; C:cytoplasm	EC:1.5.1.2	Pyrroline-5-carboxylate reductase	IPR000304 (PIRSF); IPR029036 (PFAM); IPR000304 (TIGRFAM); G3DSA:3.40.50.720 (GENE3D); G3DSA:1.10.3730.10 (GENE3D); IPR028939 (PFAM); PTHR11645:SF0 (PANTHER); IPR000304 (PANTHER); IPR000304 (PROSITE_PATTERNS); IPR000304 (HAMAP); IPR008927 (SUPERFAMILY); IPR036291 (SUPERFAMILY)	P:GO:0006561; F:GO:0004735	P:proline biosynthetic process; F:pyrroline-5-carboxylate reductase activity
WP_003116295.1	MULTISPECIES: cytochrome c [Pseudomonas]	14	4	12	4	44.7	264	4	0	4	Yes	0.999212	0.955118		1.20389	0.00135749		1.38019	3.39539e-05		1.82105	0.000943796	Higher	PA4619		probable c-type cytochrome	PA4619	1.07441	0.629825	C	P:GO:0022900; F:GO:0005506; F:GO:0009055; F:GO:0016614; F:GO:0020037; C:GO:0016020	P:electron transport chain; F:iron ion binding; F:electron transfer activity; F:oxidoreductase activity, acting on CH-OH group of donors; F:heme binding; C:membrane	EC:1.1	Acting on the CH-OH group of donors	IPR008168 (PRINTS); IPR014353 (PIRSF); IPR009056 (PFAM); IPR009056 (PFAM); IPR036909 (G3DSA:1.10.760.GENE3D); IPR036909 (G3DSA:1.10.760.GENE3D); PTHR35008 (PANTHER); PTHR35008:SF8 (PANTHER); IPR009056 (PROSITE_PROFILES); IPR009056 (PROSITE_PROFILES); IPR009056 (PROSITE_PROFILES); IPR036909 (SUPERFAMILY); IPR036909 (SUPERFAMILY); IPR036909 (SUPERFAMILY)	F:GO:0005506; F:GO:0009055; F:GO:0016614; F:GO:0020037; C:GO:0016020	F:iron ion binding; F:electron transfer activity; F:oxidoreductase activity, acting on CH-OH group of donors; F:heme binding; C:membrane
WP_003093717.1	MULTISPECIES: 30S ribosomal protein S17 [Pseudomonas]	50	5	43	5	10.1	1041	5	0	5	Yes	1.04226	0.397386		-1.08378	0.227995		1.37982	0.00173824		1.01797	0.767118		PA4254	rpsQ	30S ribosomal protein S17	rpsQ	2.85661	0.00313553	J	P:GO:0000028; P:GO:0006412; P:GO:0046677; F:GO:0003735; F:GO:0070181	P:ribosomal small subunit assembly; P:translation; P:response to antibiotic; F:structural constituent of ribosome; F:small ribosomal subunit rRNA binding			IPR000266 (PRINTS); IPR019984 (TIGRFAM); G3DSA:2.40.50.140 (GENE3D); IPR000266 (PFAM); IPR000266 (PANTHER); PTHR10744:SF1 (PANTHER); IPR019984 (HAMAP); IPR012340 (SUPERFAMILY)	P:GO:0006412; F:GO:0003735; C:GO:0005840	P:translation; F:structural constituent of ribosome; C:ribosome
WP_003101155.1	MULTISPECIES: enoyl-CoA hydratase [Pseudomonas]	27	6	10	6	28.1	291	6	0	6	Yes	1.02661	0.655765		1.30876	0.00735792		1.37916	0.00375271		1.28582	0.00990461		PA4330		probable enoyl-CoA hydratase/isomerase	PA4330	1.01844	0.865046	I	F:GO:0004300; F:GO:0016853	F:enoyl-CoA hydratase activity; F:isomerase activity	EC:5; EC:4.2.1.17	Isomerases; Enoyl-CoA hydratase	G3DSA:3.90.226.10 (GENE3D); IPR014748 (G3DSA:1.10.12.GENE3D); IPR001753 (PFAM); PTHR43684 (PANTHER); PTHR43684:SF1 (PANTHER); cd06558 (CDD); IPR029045 (SUPERFAMILY)	F:GO:0003824	F:catalytic activity
WP_003086107.1	MULTISPECIES: YebC/PmpR family DNA-binding transcriptional regulator [Pseudomonas]	27	5	20	5	26.5	715	5	0	5	Yes	0.995166	0.934754		1.17435	0.325252		1.37867	0.0366324		0.91968	0.379663		PA0964	pmpR	pqsR-mediated PQS regulator, PmpR	pmpR	1.42467	0.0210301	K	P:GO:0006355; P:GO:0010212; P:GO:0071281; F:GO:0003677; C:GO:0005829	P:regulation of transcription, DNA-templated; P:response to ionizing radiation; P:cellular response to iron ion; F:DNA binding; C:cytosol			IPR002876 (PFAM); IPR017856 (G3DSA:1.10.10.GENE3D); IPR026564 (G3DSA:3.30.70.GENE3D); IPR002876 (TIGRFAM); IPR026564 (G3DSA:3.30.70.GENE3D); PTHR12532:SF6 (PANTHER); IPR002876 (PANTHER); IPR002876 (HAMAP); IPR029072 (SUPERFAMILY)	no GO terms	no GO terms
WP_003096508.1	MULTISPECIES: xanthine phosphoribosyltransferase [Pseudomonas]	32	5	11	5	20.6	347	5	0	5	Yes	0.999466	0.979018		1.18189	0.0640708		1.37821	0.0114081		1.8	0.0612613		PA5298		xanthine phosphoribosyltransferase	PA5298	-1.43639	0.00655121	F	P:GO:0006166; P:GO:0032265; P:GO:0046110; F:GO:0000310; C:GO:0005737	P:purine ribonucleoside salvage; P:XMP salvage; P:xanthine metabolic process; F:xanthine phosphoribosyltransferase activity; C:cytoplasm	EC:2.4.2.22	Xanthine phosphoribosyltransferase	IPR000836 (PFAM); IPR010079 (TIGRFAM); IPR029057 (G3DSA:3.40.50.GENE3D); PTHR43864:SF1 (PANTHER); PTHR43864 (PANTHER); IPR010079 (HAMAP); IPR000836 (CDD); IPR029057 (SUPERFAMILY)	P:GO:0043101; P:GO:0046110; F:GO:0016763	P:purine-containing compound salvage; P:xanthine metabolic process; F:pentosyltransferase activity
WP_003098180.1	MULTISPECIES: nitrite/sulfite reductase [Pseudomonas]	45	22	70	22	62.1	2318	22	0	22	Yes	1.01342	0.775727		1.03887	0.50395		1.37696	2.1108e-05		1.09963	0.135143		PA1838	cysI	sulfite reductase	cysI	1.09063	0.718514	C	P:GO:0009970; F:GO:0016002; F:GO:0020037; F:GO:0046872; F:GO:0050311; F:GO:0051539	P:cellular response to sulfate starvation; F:sulfite reductase activity; F:heme binding; F:metal ion binding; F:sulfite reductase (ferredoxin) activity; F:4 iron, 4 sulfur cluster binding	EC:1.8.7.1	Assimilatory sulfite reductase (ferredoxin)	IPR006067 (PFAM); IPR005117 (PFAM); IPR006067 (PFAM); IPR045854 (G3DSA:3.30.413.GENE3D); G3DSA:3.90.480.20 (GENE3D); G3DSA:3.90.480.10 (GENE3D); IPR045854 (G3DSA:3.30.413.GENE3D); PTHR11493:SF47 (PANTHER); IPR045169 (PANTHER); IPR045854 (SUPERFAMILY); IPR036136 (SUPERFAMILY); IPR036136 (SUPERFAMILY); IPR045854 (SUPERFAMILY)	F:GO:0016491; F:GO:0020037; F:GO:0051536	F:oxidoreductase activity; F:heme binding; F:iron-sulfur cluster binding
WP_003102565.1	MULTISPECIES: glycosyltransferase family 1 protein [Pseudomonas]	20	6	15	6	49.3	361	6	0	6	Yes	1.02641	0.469379		1.2417	0.00189527		1.37658	8.21938e-06		3.74278	0.000708088	Higher	PA5456		putative glycosyltransferase	PA5456	-1.10299	0.301961	M	F:GO:0016740	F:transferase activity	EC:2	Transferases	PF13692 (PFAM); G3DSA:3.40.50.2000 (GENE3D); PTHR46656 (PANTHER); SSF53756 (SUPERFAMILY)	no GO terms	no GO terms
WP_110183977.1	isoleucine--tRNA ligase [Pseudomonas aeruginosa]	32	26	102	26	105.3	2896	26	0	26	Yes	1.0132	0.411365		1.27222	3.06341e-06		1.37636	8.73209e-06		-1.06336	0.00563224		PA4560	ileS	isoleucyl-tRNA synthetase	ileS	1.18384	0.0645629	J	P:GO:0006428; P:GO:0106074; F:GO:0000049; F:GO:0002161; F:GO:0004822; F:GO:0005524; F:GO:0008270; C:GO:0005829	P:isoleucyl-tRNA aminoacylation; P:aminoacyl-tRNA metabolism involved in translational fidelity; F:tRNA binding; F:aminoacyl-tRNA editing activity; F:isoleucine-tRNA ligase activity; F:ATP binding; F:zinc ion binding; C:cytosol	EC:6.1.1.5; EC:3.1.1.1	Isoleucine--tRNA ligase; Carboxylesterase	IPR002301 (PRINTS); IPR002300 (PFAM); IPR010663 (PFAM); IPR002301 (TIGRFAM); G3DSA:1.10.10.830 (GENE3D); G3DSA:1.10.730.20 (GENE3D); IPR013155 (PFAM); IPR014729 (G3DSA:3.40.50.GENE3D); IPR014729 (G3DSA:3.40.50.GENE3D); PTHR42765 (PANTHER); PTHR42765:SF1 (PANTHER); IPR001412 (PROSITE_PATTERNS); IPR023585 (HAMAP); cd00818 (CDD); IPR033708 (CDD); IPR009008 (SUPERFAMILY); IPR009080 (SUPERFAMILY); SSF…	P:GO:0006418; P:GO:0006428; F:GO:0000049; F:GO:0000166; F:GO:0002161; F:GO:0004812; F:GO:0004822; F:GO:0005524	P:tRNA aminoacylation for protein translation; P:isoleucyl-tRNA aminoacylation; F:tRNA binding; F:nucleotide binding; F:aminoacyl-tRNA editing activity; F:aminoacyl-tRNA ligase activity; F:isoleucine-tRNA ligase activity; F:ATP binding
WP_003105999.1	MULTISPECIES: sulfurtransferase TusA [Pseudomonas]	43	2	4	2	8.9	131	2	0	2	Yes	-1.06449	0.426218		1.17671	0.1603		1.37618	0.0655503		1.1417	0.128111		PA1564		conserved hypothetical protein	PA1564	-1.26145	0.0209144	O	P:GO:0002143; P:GO:0006777; F:GO:0016740; F:GO:0097163; C:GO:0005829	P:tRNA wobble position uridine thiolation; P:Mo-molybdopterin cofactor biosynthetic process; F:transferase activity; F:sulfur carrier activity; C:cytosol	EC:2	Transferases	IPR036868 (G3DSA:3.30.110.GENE3D); IPR001455 (PFAM); PTHR33279 (PANTHER); PTHR33279:SF2 (PANTHER); IPR001455 (PROSITE_PATTERNS); IPR022931 (HAMAP); IPR022931 (CDD); IPR036868 (SUPERFAMILY)	P:GO:0002143; F:GO:0097163	P:tRNA wobble position uridine thiolation; F:sulfur carrier activity
WP_023464728.1	FAD-binding oxidoreductase [Pseudomonas aeruginosa]	16	4	6	4	49.1	327	4	0	4	Yes	1.04624	0.355553		1.28193	0.0019956		1.37616	0.00185186											E	F:GO:0016491	F:oxidoreductase activity	EC:1	Oxidoreductases	IPR006076 (PFAM); G3DSA:3.30.9.10 (GENE3D); IPR036188 (G3DSA:3.50.50.GENE3D); PTHR13847:SF222 (PANTHER); PTHR13847 (PANTHER); IPR036188 (SUPERFAMILY)	F:GO:0016491	F:oxidoreductase activity
WP_015649655.1	hypothetical protein [Pseudomonas aeruginosa]	48	7	18	7	16	593	7	0	7	Yes	-1.05317	0.214597		1.43169	0.00304807		1.37523	0.000969879																no IPS match	no IPS match	no IPS match
WP_003121090.1	MULTISPECIES: glycine cleavage system protein H [Pseudomonas]	27	3	5	3	17.1	101	3	0	3	Yes	1.07968	0.281335		1.32343	0.0106952		1.3743	0.000315848		2.13899	0.0731659		PA4796		hypothetical protein	PA4796	1.01116	0.949609	E	P:GO:0019464; C:GO:0005960	P:glycine decarboxylation via glycine cleavage system; C:glycine cleavage complex			G3DSA:2.40.50.100 (GENE3D); IPR033753 (PFAM); PTHR11715:SF3 (PANTHER); IPR002930 (PANTHER); IPR033753 (CDD); IPR011053 (SUPERFAMILY)	P:GO:0019464; C:GO:0005960	P:glycine decarboxylation via glycine cleavage system; C:glycine cleavage complex
WP_003093698.1	MULTISPECIES: 50S ribosomal protein L18 [Pseudomonas]	54	6	35	6	12.7	1427	6	0	6	Yes	1.01222	0.807839		1.05069	0.553218		1.37302	0.0109006		1.00575	0.991783		PA4247	rplR	50S ribosomal protein L18	rplR	1.4694	0.141139	J	P:GO:0006412; F:GO:0003735; F:GO:0008097	P:translation; F:structural constituent of ribosome; F:5S rRNA binding			IPR004389 (TIGRFAM); G3DSA:3.30.420.100 (GENE3D); IPR005484 (PFAM); PTHR12899:SF3 (PANTHER); IPR005484 (PANTHER); IPR004389 (HAMAP); cd00432 (CDD); SSF53137 (SUPERFAMILY)	P:GO:0006412; F:GO:0003735; C:GO:0005840	P:translation; F:structural constituent of ribosome; C:ribosome
WP_003099569.1	MULTISPECIES: ribosomal RNA small subunit methyltransferase A [Pseudomonas]	32	8	16	8	30.1	358	8	0	8	Yes	1.05641	0.0951453		1.20867	0.00638413		1.37246	8.53146e-05		-1.10616	0.00858749		PA0592	ksgA	rRNA (adenine-N6,N6)-dimethyltransferase	ksgA	-1.22047	0.00303818	J	P:GO:0000028; P:GO:0070475; F:GO:0003690; F:GO:0003729; F:GO:0019843; F:GO:0052908; C:GO:0005829	P:ribosomal small subunit assembly; P:rRNA base methylation; F:double-stranded DNA binding; F:mRNA binding; F:rRNA binding; F:16S rRNA (adenine(1518)-N(6)/adenine(1519)-N(6))-dimethyltransferase activity; C:cytosol	EC:2.1.1.182	16S rRNA (adenine(1518)-N(6)/adenine(1519)-N(6))-dimethyltransferase	G3DSA:3.40.50.150 (GENE3D); IPR023165 (G3DSA:1.10.8.GENE3D); IPR001737 (PFAM); IPR011530 (TIGRFAM); IPR001737 (PANTHER); IPR020596 (PROSITE_PATTERNS); IPR001737 (PROSITE_PROFILES); IPR011530 (HAMAP); cd02440 (CDD); IPR029063 (SUPERFAMILY)	P:GO:0000154; P:GO:0006364; F:GO:0000179; F:GO:0008649	P:rRNA modification; P:rRNA processing; F:rRNA (adenine-N6,N6-)-dimethyltransferase activity; F:rRNA methyltransferase activity
WP_031299468.1	MULTISPECIES: XRE family transcriptional regulator [Pseudomonas]	26	3	5	3	10.5	106	3	0	3	Yes	-1.06991	0.0477771		1.30565	0.00664699		1.37243	6.47834e-05											K	F:GO:0003677	F:DNA binding			Coil (COILS); IPR001387 (PFAM); IPR010982 (G3DSA:1.10.260.GENE3D); IPR001387 (PROSITE_PROFILES); IPR001387 (CDD); IPR010982 (SUPERFAMILY)	F:GO:0003677	F:DNA binding
WP_071536776.1	DUF2875 domain-containing protein [Pseudomonas aeruginosa]	17	6	10	6	52.4	176	6	0	6	Yes	1.03922	0.694328		1.2785	0.0261123		1.37222	0.00894923											S					IPR021531 (PFAM); mobidb-lite (MOBIDB_LITE)	no GO terms	no GO terms
WP_003113908.1	MULTISPECIES: translation initiation factor IF-2 [Pseudomonas]	50	31	160	31	90.9	5171	31	0	31	Yes	1.01615	0.453492		1.17002	0.000864883		1.37178	1.5831e-06		0.987409	0.588009		PA4744	infB	translation initiation factor IF-2	infB	1.56229	0.13158	J	P:GO:0006413; F:GO:0003743; F:GO:0003924; F:GO:0005525; F:GO:0032550; F:GO:0043024; F:GO:0097216; C:GO:0005829	P:translational initiation; F:translation initiation factor activity; F:GTPase activity; F:GTP binding; F:purine ribonucleoside binding; F:ribosomal small subunit binding; F:guanosine tetraphosphate binding; C:cytosol	EC:3.6.1	Acting on acid anhydrides	Coil (COILS); IPR027417 (G3DSA:3.40.50.GENE3D); G3DSA:2.40.30.10 (GENE3D); IPR023115 (PFAM); IPR006847 (PFAM); IPR000795 (PFAM); IPR000178 (TIGRFAM); IPR013575 (PFAM); G3DSA:3.30.56.50 (GENE3D); G3DSA:2.40.30.10 (GENE3D); IPR036925 (G3DSA:3.40.50.GENE3D); IPR005225 (TIGRFAM); mobidb-lite (MOBIDB_LITE); mobidb-lite (MOBIDB_LITE); mobidb-lite (MOBIDB_LITE); mobidb-lite (MOBIDB_LITE); PTHR43381:SF5 …	P:GO:0006413; F:GO:0003743; F:GO:0003924; F:GO:0005525	P:translational initiation; F:translation initiation factor activity; F:GTPase activity; F:GTP binding
WP_003106119.1	MULTISPECIES: chemotaxis protein [Pseudomonas]	26	4	8	4	17.6	191	4	0	4	Yes	1.05048	0.474572		1.34023	0.0362941		1.37077	0.00991392					PA0415	chpC	probable chemotaxis protein	chpC	1.1676	0.156119	NT	P:GO:0006935; P:GO:0007165; P:GO:0032259; F:GO:0008168	P:chemotaxis; P:signal transduction; P:methylation; F:methyltransferase activity	EC:2.1.1	Transferring one-carbon groups	Coil (COILS); IPR002545 (PFAM); mobidb-lite (MOBIDB_LITE); mobidb-lite (MOBIDB_LITE); IPR002545 (PROSITE_PROFILES); IPR036061 (SUPERFAMILY)	P:GO:0006935; P:GO:0007165	P:chemotaxis; P:signal transduction
WP_003105399.1	MULTISPECIES: TRAP transporter substrate-binding protein DctP [Pseudomonas]	33	11	24	11	37.7	632	11	0	11	Yes	1.00624	0.818435		1.54962	0.000100385	Up	1.36958	5.61508e-06		2.69001	0.00066654	Higher	PA3779		putative periplasmic substrate binding protein	PA3779	-1.32142	0.0167208	G	P:GO:0055085; F:GO:0030246	P:transmembrane transport; F:carbohydrate binding			Coil (COILS); IPR018389 (PFAM); IPR038404 (G3DSA:3.40.190.GENE3D); IPR018389 (PANTHER); PTHR33376:SF2 (PANTHER); IPR006311 (PROSITE_PROFILES); cd13677 (CDD)	P:GO:0055085	P:transmembrane transport
WP_003084345.1	MULTISPECIES: DUF4399 domain-containing protein [Proteobacteria]	62	6	30	6	15.5	994	6	0	6	Yes	-1.10302	0.250682		-1.00896	0.853974		1.3682	0.052545		-1.23582	0.0150843		PA0315		hypothetical protein	PA0315	1.34529	0.325186	S					IPR025512 (PFAM)	no GO terms	no GO terms
WP_003114975.1	MULTISPECIES: DUF853 domain-containing protein [Pseudomonas]	33	15	42	15	53.2	1315	15	0	15	Yes	1.05405	0.0183569		1.40672	5.52893e-06		1.36641	2.33069e-06		-1.30168	1.29317e-05		PA4308		conserved hypothetical protein	PA4308	1.33575	1.04e-05	S	F:GO:0005524	F:ATP binding			IPR033186 (PFAM); IPR027417 (G3DSA:3.40.50.GENE3D); IPR027417 (G3DSA:3.40.50.GENE3D); mobidb-lite (MOBIDB_LITE); mobidb-lite (MOBIDB_LITE); PTHR30121 (PANTHER); PTHR30121:SF6 (PANTHER); IPR027417 (SUPERFAMILY)	no GO terms	no GO terms
WP_003095144.1	MULTISPECIES: 2-amino-4-hydroxy-6-hydroxymethyldihydropteridine diphosphokinase [Pseudomonas]	15	2	6	2	18	368	2	0	2	Yes	1.04607	0.587064		0.995164	0.982709		1.366	0.0122905		2.3139	0.00345641	Higher	PA4728	folK	2-amino-4-hydroxy-6-hydroxymethyldihydropteridine pyrophosphokinase	folK	-1.62132	0.00731711	H	P:GO:0016310; P:GO:0046654; P:GO:0046656; F:GO:0000287; F:GO:0003848; F:GO:0005524; F:GO:0016301	P:phosphorylation; P:tetrahydrofolate biosynthetic process; P:folic acid biosynthetic process; F:magnesium ion binding; F:2-amino-4-hydroxy-6-hydroxymethyldihydropteridine diphosphokinase activity; F:ATP binding; F:kinase activity	EC:2.7.6.3	2-amino-4-hydroxy-6-hydroxymethyldihydropteridine diphosphokinase	IPR035907 (G3DSA:3.30.70.GENE3D); IPR000550 (TIGRFAM); IPR000550 (PFAM); PTHR43071:SF1 (PANTHER); PTHR43071 (PANTHER); IPR000550 (PROSITE_PATTERNS); IPR000550 (CDD); IPR035907 (SUPERFAMILY)	P:GO:0009396; F:GO:0003848	P:folic acid-containing compound biosynthetic process; F:2-amino-4-hydroxy-6-hydroxymethyldihydropteridine diphosphokinase activity
WP_071536728.1	hypothetical protein [Pseudomonas aeruginosa]	22	12	21	12	64.4	531	12	0	12	Yes	-1.01978	0.432767		1.14661	0.00469897		1.36591	0.000527149											L	P:GO:0016310; F:GO:0016301	P:phosphorylation; F:kinase activity			Coil (COILS); PF13589 (PFAM); IPR036890 (G3DSA:3.30.565.GENE3D); mobidb-lite (MOBIDB_LITE); IPR036890 (SUPERFAMILY)	no GO terms	no GO terms
WP_003085573.1	MULTISPECIES: tRNA 5-methoxyuridine(34)/uridine 5-oxyacetic acid(34) synthase CmoB [Pseudomonas]	23	7	18	7	36.5	525	7	0	7	Yes	-1.01054	0.810467		1.11216	0.0398822		1.36546	0.000616847		1.13445	0.112433		PA0774		conserved hypothetical protein	PA0774	-1.55772	0.0100968	J	P:GO:0002098; P:GO:0032259; P:GO:0051289; F:GO:0008168; F:GO:0016765; F:GO:0042802	P:tRNA wobble uridine modification; P:methylation; P:protein homotetramerization; F:methyltransferase activity; F:transferase activity, transferring alkyl or aryl (other than methyl) groups; F:identical protein binding	EC:2.5.1; EC:2.1.1	Transferring alkyl or aryl groups, other than methyl groups; Transferring one-carbon groups	G3DSA:3.40.50.150 (GENE3D); IPR010017 (TIGRFAM); IPR027555 (PFAM); PTHR43464 (PANTHER); PTHR43464:SF54 (PANTHER); IPR010017 (HAMAP); cd02440 (CDD); IPR029063 (SUPERFAMILY)	P:GO:0002098; F:GO:0016765	P:tRNA wobble uridine modification; F:transferase activity, transferring alkyl or aryl (other than methyl) groups
WP_023464481.1	LTA synthase family protein [Pseudomonas aeruginosa]	28	16	35	16	77.9	731	16	0	16	Yes	1.06374	0.219555		1.20828	0.00177972		1.36539	0.000492835		2.17712	0.00324881	Higher	PA1689		conserved hypothetical protein	PA1689	1.44892	0.099158	M	F:GO:0008484; F:GO:0046872; C:GO:0016021	F:sulfuric ester hydrolase activity; F:metal ion binding; C:integral component of membrane	EC:3.1.6	Acting on ester bonds	IPR017850 (G3DSA:3.40.720.GENE3D); G3DSA:3.30.1120.80 (GENE3D); IPR012160 (PIRSF); IPR000917 (PFAM); PTHR47371 (PANTHER); PTHR47371:SF3 (PANTHER); cd16015 (CDD); IPR017850 (SUPERFAMILY)	F:GO:0003824; F:GO:0008484	F:catalytic activity; F:sulfuric ester hydrolase activity
WP_003102066.1	MULTISPECIES: 3',5'-cyclic-AMP phosphodiesterase [Pseudomonas]	19	4	8	4	30.5	251	4	0	4	Yes	1.01316	0.740704		1.12278	0.0351601		1.36513	5.72868e-05		-1.14267	0.0137377		PA4969	cpdA	Cyclic AMP (cAMP) Phosphodiesterase, CpdA	cpdA	-1.15493	0.0231155	S	P:GO:0042545; F:GO:0000166; F:GO:0004115; F:GO:0008198	P:cell wall modification; F:nucleotide binding; F:3',5'-cyclic-AMP phosphodiesterase activity; F:ferrous iron binding	EC:3.1.4.17; EC:3.1.4.53	3',5'-cyclic-nucleotide phosphodiesterase; 3',5'-cyclic-AMP phosphodiesterase	IPR029052 (G3DSA:3.60.21.GENE3D); IPR004843 (PFAM); PTHR42988 (PANTHER); IPR026575 (HAMAP); IPR026575 (CDD); IPR029052 (SUPERFAMILY)	F:GO:0004112; F:GO:0016787	F:cyclic-nucleotide phosphodiesterase activity; F:hydrolase activity
WP_003085971.1	MULTISPECIES: aspartokinase [Pseudomonas]	57	20	84	20	44.4	2817	20	0	20	Yes	1.03399	0.176237		1.1948	0.00379907		1.36504	4.21486e-05		0.955513	0.19625		PA0904	lysC	aspartate kinase alpha and beta chain	lysC	1.5874	0.00596489	E	P:GO:0009088; P:GO:0009089; P:GO:0009090; P:GO:0016310; P:GO:0019877; F:GO:0004072; F:GO:0005524; C:GO:0005829; C:GO:0009570	P:threonine biosynthetic process; P:lysine biosynthetic process via diaminopimelate; P:homoserine biosynthetic process; P:phosphorylation; P:diaminopimelate biosynthetic process; F:aspartate kinase activity; F:ATP binding; C:cytosol; C:chloroplast stroma	EC:2.7.2.4	Aspartate kinase	IPR005260 (PIRSF); G3DSA:3.30.2130.10 (GENE3D); IPR001048 (PFAM); IPR002912 (PFAM); IPR027795 (PFAM); IPR036393 (G3DSA:3.40.1160.GENE3D); IPR005260 (TIGRFAM); IPR001341 (TIGRFAM); PTHR21499:SF3 (PANTHER); PTHR21499 (PANTHER); IPR018042 (PROSITE_PATTERNS); IPR002912 (PROSITE_PROFILES); IPR002912 (PROSITE_PROFILES); cd04913 (CDD); IPR041740 (CDD); cd04923 (CDD); IPR045865 (SUPERFAMILY); IPR045865 (…	P:GO:0008652; P:GO:0009089; F:GO:0004072	P:cellular amino acid biosynthetic process; P:lysine biosynthetic process via diaminopimelate; F:aspartate kinase activity
WP_073662265.1	hypothetical protein [Pseudomonas aeruginosa]	21	4	9	4	27.9	415	4	0	4	Yes	1.00247	0.994632		1.31915	0.00610364		1.36324	0.00279824					PA5502		hypothetical protein	PA5502	-1.07133	0.340769						Coil (COILS); PS51257 (PROSITE_PROFILES)	no GO terms	no GO terms
WP_012613934.1	MULTISPECIES: transaldolase [Pseudomonas]	58	16	67	16	34	2182	16	0	16	Yes	1.0105	0.633466		1.36652	1.78054e-05		1.36284	1.59263e-05		-1.27631	0.00104476		PA2796	tal	transaldolase	tal	-1.02306	0.867702	G	P:GO:0005975; P:GO:0006098; F:GO:0004801; C:GO:0005829	P:carbohydrate metabolic process; P:pentose-phosphate shunt; F:transaldolase activity; C:cytosol	EC:2.2.1.2	Transaldolase	IPR001585 (PFAM); IPR013785 (G3DSA:3.20.20.GENE3D); IPR004730 (TIGRFAM); IPR004730 (PTHR10683:PANTHER); IPR001585 (PANTHER); IPR018225 (PROSITE_PATTERNS); IPR018225 (PROSITE_PATTERNS); IPR004730 (HAMAP); IPR004730 (CDD); SSF51569 (SUPERFAMILY)	P:GO:0005975; P:GO:0006098; F:GO:0003824; F:GO:0004801; C:GO:0005737	P:carbohydrate metabolic process; P:pentose-phosphate shunt; F:catalytic activity; F:transaldolase activity; C:cytoplasm
WP_003105274.1	MULTISPECIES: thioredoxin [Pseudomonas]	49	12	56	12	31.9	2183	12	0	12	Yes	1.02295	0.246142		1.344	2.05417e-06		1.36243	0.000398605		-1.20568	0.00034584		PA4061		probable thioredoxin	PA4061	1.03116	0.854151	O	P:GO:0006662; P:GO:0045454; P:GO:0061077; F:GO:0005515; F:GO:0015035; C:GO:0005829	P:glycerol ether metabolic process; P:cell redox homeostasis; P:chaperone-mediated protein folding; F:protein binding; F:protein-disulfide reductase activity; C:cytosol	EC:1.8	Acting on a sulfur group of donors	PR00421 (PRINTS); PF14561 (PFAM); IPR011990 (G3DSA:1.25.40.GENE3D); G3DSA:3.40.30.10 (GENE3D); IPR011990 (G3DSA:1.25.40.GENE3D); IPR005746 (TIGRFAM); IPR013766 (PFAM); PF14559 (PFAM); PTHR43601:SF3 (PANTHER); PTHR43601 (PANTHER); IPR017937 (PROSITE_PATTERNS); IPR013766 (PROSITE_PROFILES); cd02956 (CDD); IPR036249 (SUPERFAMILY); IPR011990 (SUPERFAMILY)	F:GO:0005515; F:GO:0015035	F:protein binding; F:protein-disulfide reductase activity
WP_003095213.1	MULTISPECIES: nucleotide exchange factor GrpE [Pseudomonas]	91	12	81	12	20.7	1948	12	0	12	Yes	1.00117	0.950116		1.25433	0.000311888		1.3614	8.4576e-05		-1.11352	0.00608481		PA4762	grpE	heat shock protein GrpE	grpE	1.21597	0.267903	O	P:GO:0006457; P:GO:0009267; P:GO:0009408; P:GO:0050790; P:GO:0065003; F:GO:0000774; F:GO:0019904; F:GO:0042803; F:GO:0051082; F:GO:0051087; F:GO:0060589; F:GO:2001065; C:GO:0005618; C:GO:0005829; C:GO:0032991	P:protein folding; P:cellular response to starvation; P:response to heat; P:regulation of catalytic activity; P:protein-containing complex assembly; F:adenyl-nucleotide exchange factor activity; F:protein domain specific binding; F:protein homodimerization activity; F:unfolded protein binding; F:chaperone binding; F:nucleoside-triphosphatase regulator activity; F:mannan binding; C:cell wall; C:cy…			Coil (COILS); IPR000740 (PRINTS); IPR013805 (G3DSA:3.90.20.GENE3D); IPR000740 (PFAM); IPR009012 (G3DSA:2.30.22.GENE3D); mobidb-lite (MOBIDB_LITE); mobidb-lite (MOBIDB_LITE); PTHR21237:SF23 (PANTHER); IPR000740 (PANTHER); IPR000740 (PROSITE_PATTERNS); IPR000740 (HAMAP); IPR000740 (CDD); IPR009012 (SUPERFAMILY); IPR013805 (SUPERFAMILY)	P:GO:0006457; F:GO:0000774; F:GO:0042803; F:GO:0051087	P:protein folding; F:adenyl-nucleotide exchange factor activity; F:protein homodimerization activity; F:chaperone binding
WP_003097674.1	MULTISPECIES: NADH-quinone oxidoreductase subunit F [Pseudomonas]	34	15	56	15	48.6	1160	15	0	15	Yes	1.01686	0.509391		1.17823	0.000484077		1.36087	8.82916e-06		-1.17215	0.000261421		PA2641	nuoF	NADH dehydrogenase I chain F	nuoF	1.6084	0.0266509	C	P:GO:0009060; F:GO:0008137; F:GO:0010181; F:GO:0046872; F:GO:0048038; F:GO:0051287; F:GO:0051539; C:GO:0045272	P:aerobic respiration; F:NADH dehydrogenase (ubiquinone) activity; F:FMN binding; F:metal ion binding; F:quinone binding; F:NAD binding; F:4 iron, 4 sulfur cluster binding; C:plasma membrane respiratory chain complex I	EC:7.1.1.2; EC:1.6.5.11; EC:1.6.5.2	NADH:ubiquinone reductase (H(+)-translocating); NADH dehydrogenase (quinone); NAD(P)H dehydrogenase (quinone)	G3DSA:3.10.20.600 (GENE3D); IPR011538 (PFAM); IPR037207 (G3DSA:1.20.1440.GENE3D); IPR019575 (PFAM); IPR037225 (G3DSA:3.40.50.GENE3D); G3DSA:6.10.250.1450 (GENE3D); IPR011537 (TIGRFAM); PTHR43578:SF3 (PANTHER); PTHR43578 (PANTHER); IPR001949 (PROSITE_PATTERNS); IPR001949 (PROSITE_PATTERNS); IPR037225 (SUPERFAMILY); IPR037207 (SUPERFAMILY); SSF142984 (SUPERFAMILY)	F:GO:0008137; F:GO:0010181; F:GO:0051287; F:GO:0051539	F:NADH dehydrogenase (ubiquinone) activity; F:FMN binding; F:NAD binding; F:4 iron, 4 sulfur cluster binding
WP_003114478.1	MULTISPECIES: 2,3-bisphosphoglycerate-independent phosphoglycerate mutase [Pseudomonas]	36	17	61	17	55.6	1889	17	0	17	Yes	-1.0297	0.218516		1.16346	0.00234594		1.36058	3.8138e-05		0.998588	0.930604		PA5131	pgm	phosphoglycerate mutase	pgm	-1.0823	0.368986	G	P:GO:0006007; P:GO:0006096; P:GO:0006979; P:GO:0043937; P:GO:0044262; F:GO:0030145; F:GO:0046537; C:GO:0005829	P:glucose catabolic process; P:glycolytic process; P:response to oxidative stress; P:regulation of sporulation; P:cellular carbohydrate metabolic process; F:manganese ion binding; F:2,3-bisphosphoglycerate-independent phosphoglycerate mutase activity; C:cytosol	EC:5.4.2.1	Intramolecular transferases	IPR017850 (G3DSA:3.40.720.GENE3D); IPR011258 (PFAM); IPR006124 (PFAM); IPR036646 (G3DSA:3.40.1450.GENE3D); IPR005995 (PIRSF); IPR005995 (TIGRFAM); PTHR31637:SF0 (PANTHER); IPR005995 (PANTHER); IPR005995 (HAMAP); IPR005995 (CDD); IPR036646 (SUPERFAMILY); IPR017850 (SUPERFAMILY)	P:GO:0006007; F:GO:0003824; F:GO:0004619; F:GO:0030145; F:GO:0046872; C:GO:0005737	P:glucose catabolic process; F:catalytic activity; F:phosphoglycerate mutase activity; F:manganese ion binding; F:metal ion binding; C:cytoplasm
WP_003095206.1	MULTISPECIES: transcription elongation factor GreA [Pseudomonas]	62	9	51	9	17.1	1766	9	0	9	Yes	-1.01838	0.738547		1.34675	0.000552276		1.35994	0.00793268		-1.25477	0.0161859		PA4755	greA	transcription elongation factor GreA	greA	1.89792	0.0173726	K	P:GO:0006414; P:GO:0032784; P:GO:0046677; F:GO:0001108; F:GO:0003677; F:GO:0003746; F:GO:0070063; C:GO:0005618; C:GO:0005829; C:GO:0005886	P:translational elongation; P:regulation of DNA-templated transcription, elongation; P:response to antibiotic; F:bacterial-type RNA polymerase holo enzyme binding; F:DNA binding; F:translation elongation factor activity; F:RNA polymerase binding; C:cell wall; C:cytosol; C:plasma membrane			IPR022691 (PFAM); IPR006359 (TIGRFAM); IPR023459 (PIRSF); IPR001437 (PFAM); IPR036805 (G3DSA:1.10.287.GENE3D); IPR036953 (G3DSA:3.10.50.GENE3D); PTHR30437:SF4 (PANTHER); IPR023459 (PANTHER); IPR018151 (PROSITE_PATTERNS); IPR018151 (PROSITE_PATTERNS); IPR028624 (HAMAP); IPR036805 (SUPERFAMILY); SSF54534 (SUPERFAMILY)	P:GO:0032784; F:GO:0003677; F:GO:0070063	P:regulation of DNA-templated transcription, elongation; F:DNA binding; F:RNA polymerase binding
WP_003119971.1	MULTISPECIES: tRNA 2-thiouridine(34) synthase MnmA [Pseudomonas]	34	11	25	11	41.9	518	11	0	11	Yes	1.01512	0.599559		1.27364	0.00127209		1.35843	8.21786e-05		-1.18411	0.00179021		PA2626	trmU	tRNA methyltransferase	trmU	-1.12159	0.122598	J	P:GO:0002143; P:GO:0032259; F:GO:0000049; F:GO:0005524; F:GO:0008168; F:GO:0016783; C:GO:0005829	P:tRNA wobble position uridine thiolation; P:methylation; F:tRNA binding; F:ATP binding; F:methyltransferase activity; F:sulfurtransferase activity; C:cytosol	EC:2.8.1; EC:2.1.1	Transferring sulfur-containing groups; Transferring one-carbon groups	IPR004506 (TIGRFAM); G3DSA:2.40.30.10 (GENE3D); IPR014729 (G3DSA:3.40.50.GENE3D); IPR023382 (G3DSA:2.30.30.GENE3D); PF03054 (PFAM); PTHR11933 (PANTHER); PTHR11933:SF5 (PANTHER); IPR004506 (HAMAP); IPR004506 (CDD); SSF52402 (SUPERFAMILY)	P:GO:0008033; F:GO:0016740; F:GO:0016783	P:tRNA processing; F:transferase activity; F:sulfurtransferase activity
WP_003091117.1	MULTISPECIES: TatD family deoxyribonuclease [Pseudomonas]	40	7	18	7	28.1	715	7	0	7	Yes	1.14553	0.0547486		1.29228	0.0165193		1.35815	0.000334223		-1.2307	0.00376792		PA2959		conserved hypothetical protein	PA2959	-1.29454	0.023433	L	P:GO:0006259; F:GO:0016888; C:GO:0005829	P:DNA metabolic process; F:endodeoxyribonuclease activity, producing 5'-phosphomonoesters; C:cytosol	EC:3.1.30; EC:3.1.21	Acting on ester bonds; Acting on ester bonds	IPR001130 (PFAM); IPR001130 (PIRSF); IPR015991 (TIGRFAM); G3DSA:3.20.20.140 (GENE3D); PTHR46124:SF2 (PANTHER); PTHR46124 (PANTHER); IPR018228 (PROSITE_PATTERNS); IPR018228 (PROSITE_PATTERNS); IPR001130 (CDD); IPR032466 (SUPERFAMILY)	F:GO:0004536; F:GO:0016788	F:deoxyribonuclease activity; F:hydrolase activity, acting on ester bonds
WP_023465330.1	malic enzyme [Pseudomonas aeruginosa]	42	15	99	15	45.4	2271	15	0	15	Yes	1.00453	0.783306		1.251	1.05587e-05		1.35811	1.45632e-06		1.02541	0.532841		PA5046		malic enzyme	PA5046	-1.2737	0.0236692	C	F:GO:0004471; F:GO:0004473; F:GO:0008948; F:GO:0046872; F:GO:0051287	F:malate dehydrogenase (decarboxylating) (NAD+) activity; F:malate dehydrogenase (decarboxylating) (NADP+) activity; F:oxaloacetate decarboxylase activity; F:metal ion binding; F:NAD binding	EC:4.1.1.112; EC:1.1.1.38; EC:1.1.1.39; EC:1.1.1.40	Oxaloacetate decarboxylase; Malate dehydrogenase (oxaloacetate-decarboxylating); Malate dehydrogenase (decarboxylating); Malate dehydrogenase (oxaloacetate-decarboxylating) (NADP(+))	IPR001891 (PIRSF); G3DSA:3.40.50.720 (GENE3D); IPR012301 (PFAM); IPR037062 (G3DSA:3.40.50.GENE3D); IPR012302 (PFAM); PTHR43237 (PANTHER); IPR015884 (PROSITE_PATTERNS); IPR045213 (CDD); SSF53223 (SUPERFAMILY); IPR036291 (SUPERFAMILY)	F:GO:0004470; F:GO:0004471; F:GO:0051287	F:malic enzyme activity; F:malate dehydrogenase (decarboxylating) (NAD+) activity; F:NAD binding
WP_010792977.1	DNA helicase Rep [Pseudomonas aeruginosa]	14	9	15	9	77.1	347	9	0	9	Yes	-1.02589	0.651524		1.07709	0.216128		1.35746	0.00231517		1.27061	0.015452		PA5296	rep	ATP-dependent DNA helicase Rep	rep	-1.72059	3.27e-05	L	P:GO:0000725; P:GO:0006268; P:GO:0009314; P:GO:0044787; P:GO:0090305; F:GO:0003697; F:GO:0005524; F:GO:0008408; F:GO:0016887; F:GO:0043138; C:GO:0005829	P:recombinational repair; P:DNA unwinding involved in DNA replication; P:response to radiation; P:bacterial-type DNA replication; P:nucleic acid phosphodiester bond hydrolysis; F:single-stranded DNA binding; F:ATP binding; F:3'-5' exonuclease activity; F:ATP hydrolysis activity; F:3'-5' DNA helicase activity; C:cytosol	EC:3.6.1; EC:3.1; EC:3.6.4.12	Acting on acid anhydrides; Acting on ester bonds; DNA helicase	IPR014017 (PFAM); IPR027417 (G3DSA:3.40.50.GENE3D); IPR014016 (PFAM); G3DSA:1.10.486.10 (GENE3D); IPR027417 (G3DSA:3.40.50.GENE3D); IPR005752 (TIGRFAM); IPR013986 (G3DSA:1.10.10.GENE3D); PTHR11070:SF7 (PANTHER); IPR000212 (PANTHER); IPR014016 (PROSITE_PROFILES); IPR014017 (PROSITE_PROFILES); IPR005752 (HAMAP); cd17932 (CDD); cd18807 (CDD); IPR027417 (SUPERFAMILY)	P:GO:0006268; F:GO:0003677; F:GO:0003678; F:GO:0005524; F:GO:0016787	P:DNA unwinding involved in DNA replication; F:DNA binding; F:DNA helicase activity; F:ATP binding; F:hydrolase activity
WP_003120754.1	MULTISPECIES: DUF2059 domain-containing protein [Pseudomonas]	47	8	24	8	20	827	8	0	8	Yes	-1.01203	0.767672		1.2642	0.000723391		1.35733	0.000348038		-1.70145	1.02453e-05	Lower	PA0856		hypothetical protein	PA0856	-1.08295	0.572134	S					IPR018637 (PFAM)	no GO terms	no GO terms
WP_003099360.1	MULTISPECIES: M48 family peptidase [Pseudomonas]	42	8	27	8	29.1	985	8	0	8	Yes	0.997642	0.984807		1.35986	0.00220459		1.35721	0.00105215		-1.54436	0.000303082	Lower	PA4632		putative Zn-dependent peptidase	PA4632	1.27097	0.0653927	M	P:GO:0006508; F:GO:0004222	P:proteolysis; F:metalloendopeptidase activity	EC:3.4.24	Acting on peptide bonds (peptidases)	G3DSA:3.30.2010.10 (GENE3D); IPR001915 (PFAM); PTHR22726 (PANTHER); PTHR22726:SF1 (PANTHER); PS51257 (PROSITE_PROFILES); cd07331 (CDD)	P:GO:0006508; F:GO:0004222	P:proteolysis; F:metalloendopeptidase activity
WP_003091311.1	MULTISPECIES: DNA-binding response regulator [Pseudomonas]	15	3	6	3	24.8	139	3	0	3	Yes	1.00967	0.783014		1.17896	0.0139652		1.3557	0.000789277		1.06063	0.230024		PA3077	cprR	CprR	PA3077	1.3048	7.81e-05	K	P:GO:0000160; P:GO:0045893; P:GO:0071073; F:GO:0000156; F:GO:0000976; F:GO:0001216; C:GO:0005829; C:GO:0032993	P:phosphorelay signal transduction system; P:positive regulation of transcription, DNA-templated; P:positive regulation of phospholipid biosynthetic process; F:phosphorelay response regulator activity; F:transcription cis-regulatory region binding; F:DNA-binding transcription activator activity; C:cytosol; C:protein-DNA complex			G3DSA:6.10.250.690 (GENE3D); G3DSA:3.40.50.2300 (GENE3D); IPR036388 (G3DSA:1.10.10.GENE3D); IPR001789 (PFAM); IPR001867 (PFAM); PTHR48111:SF41 (PANTHER); IPR039420 (PANTHER); IPR001867 (PROSITE_PROFILES); IPR001789 (PROSITE_PROFILES); IPR001867 (CDD); IPR011006 (SUPERFAMILY)	P:GO:0000160; P:GO:0006355; F:GO:0003677	P:phosphorelay signal transduction system; P:regulation of transcription, DNA-templated; F:DNA binding
WP_003085898.1	MULTISPECIES: pterin-4-alpha-carbinolamine dehydratase [Pseudomonas]	45	5	26	5	13.3	625	5	0	5	Yes	-1.07022	0.179944		1.37488	0.000142775		1.35542	0.000500263		-1.45664	7.06068e-05		PA0871	phhB	pterin-4-alpha-carbinolamine dehydratase	phhB	-1.08575	0.726391	H	P:GO:0006729; F:GO:0008124	P:tetrahydrobiopterin biosynthetic process; F:4-alpha-hydroxytetrahydrobiopterin dehydratase activity	EC:4.2.1.96	4a-hydroxytetrahydrobiopterin dehydratase	IPR001533 (PFAM); IPR036428 (G3DSA:3.30.1360.GENE3D); PTHR42805 (PANTHER); IPR001533 (HAMAP); cd00913 (CDD); IPR036428 (SUPERFAMILY)	P:GO:0006729; F:GO:0008124	P:tetrahydrobiopterin biosynthetic process; F:4-alpha-hydroxytetrahydrobiopterin dehydratase activity
WP_003092262.1	MULTISPECIES: CinA family protein [Pseudomonas]	49	6	19	6	17.7	793	6	0	6	Yes	1.06821	0.0620991		1.35791	1.94005e-05		1.35515	3.84881e-05		-1.06379	0.038749		PA3618		conserved hypothetical protein	PA3618	-1.03478	0.834608	S	F:GO:0019159	F:nicotinamide-nucleotide amidase activity	EC:3.5.1.42	Nicotinamide-nucleotide amidase	IPR008136 (PFAM); IPR036653 (G3DSA:3.90.950.GENE3D); IPR008136 (TIGRFAM); PTHR13939:SF0 (PANTHER); PTHR13939 (PANTHER); IPR036653 (SUPERFAMILY)	no GO terms	no GO terms
WP_003100400.1	MULTISPECIES: fumarylacetoacetase [Pseudomonas]	32	13	58	13	46.3	1201	13	0	13	Yes	-1.06527	0.00383171		1.31166	1.22048e-06		1.35417	2.56569e-06		-2.05345	6.0475e-09	Lower	PA2008	fahA	fumarylacetoacetase	fahA	-1.5069	0.0304773	Q	P:GO:0006572; P:GO:1902000; F:GO:0004334	P:tyrosine catabolic process; P:homogentisate catabolic process; F:fumarylacetoacetase activity	EC:3.7.1.2	Fumarylacetoacetase	IPR005959 (TIGRFAM); IPR011234 (PFAM); IPR036462 (G3DSA:2.30.30.GENE3D); IPR015377 (PFAM); IPR036663 (G3DSA:3.90.850.GENE3D); IPR005959 (PANTHER); IPR036462 (SUPERFAMILY); IPR036663 (SUPERFAMILY)	P:GO:0009072; F:GO:0003824; F:GO:0004334	P:aromatic amino acid family metabolic process; F:catalytic activity; F:fumarylacetoacetase activity
WP_003095874.1	MULTISPECIES: hypothetical protein [Pseudomonas]	42	3	9	3	9.8	153	3	0	3	Yes	1.00266	0.997251		1.23061	0.040757		1.35406	0.00421585		1.00836	0.863084		PA5062		conserved hypothetical protein	PA5062	1.06854	0.518192	S					IPR013433 (TIGRFAM); IPR013433 (PFAM)	no GO terms	no GO terms
WP_003094967.1	MULTISPECIES: hypoxanthine-guanine phosphoribosyltransferase [Pseudomonas]	32	6	11	6	20.6	339	6	0	6	Yes	-1.02211	0.651779		1.17916	0.0274181		1.35314	0.00140496		-1.53352	0.000363962	Lower	PA4645		probable purine/pyrimidine phosphoribosyl transferase	PA4645	-1.20912	0.0702462	F	P:GO:0009116; F:GO:0004422; F:GO:0052657	P:nucleoside metabolic process; F:hypoxanthine phosphoribosyltransferase activity; F:guanine phosphoribosyltransferase activity	EC:2.4.2.8	Hypoxanthine phosphoribosyltransferase	IPR029057 (G3DSA:3.40.50.GENE3D); IPR000836 (PFAM); PTHR43340:SF1 (PANTHER); PTHR43340 (PANTHER); IPR000836 (CDD); IPR029057 (SUPERFAMILY)	no GO terms	no GO terms
WP_003098586.1	MULTISPECIES: skp-like protein [Pseudomonas]	47	8	32	8	19.1	599	8	0	8	Yes	-1.01475	0.656896		1.16284	0.0130777		1.35301	0.00118827		-1.11515	0.00780469		PA3647		probable outer membrane protein precursor	PA3647	1.26841	0.0220384	M	P:GO:0022417; P:GO:0032978; P:GO:0043165; P:GO:0050821; P:GO:0061077; F:GO:0001530; F:GO:0042802; F:GO:0051082; C:GO:0030288	P:protein maturation by protein folding; P:protein insertion into membrane from inner side; P:Gram-negative-bacterium-type cell outer membrane assembly; P:protein stabilization; P:chaperone-mediated protein folding; F:lipopolysaccharide binding; F:identical protein binding; F:unfolded protein binding; C:outer membrane-bounded periplasmic space			Coil (COILS); IPR024930 (G3DSA:3.30.910.GENE3D); IPR005632 (PFAM); IPR005632 (PANTHER); IPR024930 (SUPERFAMILY)	F:GO:0051082	F:unfolded protein binding
[truncated: 5,868 more rows]
