# Supplementary material for: Responses of carbapenemase-producing and non-producing carbapenem-resistant Pseudomonas aeruginosa strains to meropenem revealed by quantitative tandem mass spectrometry proteomics
Source: Front Microbiol. 2023 Feb 9;13:1089140. doi: 10.3389/fmicb.2022.1089140 (PMC9948630; doi:10.3389/fmicb.2022.1089140)
Supplement: SUPPLEMENTARY TABLE 8 — Proteins of the H1-T6SS of Pseudomonas aeruginosa CCUG 51971. The table includes their relative abundances (sub-MICs vs. no antibiotic; if quantitated), basal relative abundance compared to strain PAO1 (if fulfilling the criteria for being included in the inter-strain comparison, i.e., ≥99% of sequence identity and with 100% coverage over the longer protein), P. aeruginosa PAO1 orthologues and functional annotation. Gene expression data from the publicly available transcriptomic dataset that analyzed biofilms of P. aeruginosa PAO1 treated with meropenem (5 μg/ml) vs. no antibiotic (GEO accession number: GSE167137) is included in columns AA – AC. [file Table_8.XLSX]

## Sheet: H1-T6SS CCUG 51971
Supplementary table 8. Proteins of the H1-T6SS of Pseudomonas aeruginosa CCUG 51971.
	RefSeq		SecReT6				Pseudomonas Genome Database				8 µg/ml VS 0 µg/ml			128 µg/ml VS 0 µg/ml			256 µg/ml VS 0 µg/ml			0 µg/ml VS CCUG 56489 (= PAO1) 0 µg/ml			GEO dataset GSE167137 (P. aeruginosa PAO1 biofilm treated with 5 µg/ml meropenem VS 0 µg/ml)
	Product	Accession	Component	Best hit protein	Identities (%)	E-value	PAO1 orthologue	Product description	# Peptides	# PSMs	Fold change	p-value	Regulation	Fold change	p-value	Regulation	Fold change	p-value	Regulation	Fold change	p-value	Basal abundance	ID	Fold change	p-value	COG categories	Gene Onthology (GO) IDs	GO names	Enzyme Comission (EC) numbers	Enzyme Names	InterPro IDs	InterPro GO IDs	InterPro GO names
H1-T6SS region	serine/threonine protein kinase PpkA	WP_014603460.1	-	-	-	-	PA0074	serine/threonine protein kinase PpkA	26	63	1.14545	0.000137751		-1.1278	0.00333877		2.06832	3.01981e-06	Up	2.42	7.06833e-05	Higher	ppkA	2.40361	9.3e-07	KLT	P:GO:0006468; F:GO:0004674; F:GO:0005524	P:protein phosphorylation; F:protein serine/threonine kinase activity; F:ATP binding	EC:2.7.1	Transferring phosphorus-containing groups	G3DSA:1.10.510.10 (GENE3D); G3DSA:3.30.200.20 (GENE3D); IPR000719 (PFAM); IPR002035 (PFAM); IPR036465 (G3DSA:3.40.50.GENE3D); mobidb-lite (MOBIDB_LITE); mobidb-lite (MOBIDB_LITE); mobidb-lite (MOBIDB_LITE); mobidb-lite (MOBIDB_LITE); mobidb-lite (MOBIDB_LITE); PTHR43289:SF18 (PANTHER); PTHR43289 (PANTHER); IPR008271 (PROSITE_PATTERNS); IPR017441 (PROSITE_PATTERNS); IPR002035 (PROSITE_PROFILES); I…	P:GO:0006468; F:GO:0004672; F:GO:0005524	P:protein phosphorylation; F:protein kinase activity; F:ATP binding
	serine/threonine phosphatase PppA	WP_003083639.1	-	-	-	-	PA0075	PppA	5	13	1.07347	0.167183		1.31197	0.0020269		2.07063	1.14239e-05	Up	2.01715	0.0171955	Higher	pppA	2.61524	1.46e-07	T	P:GO:0006470; P:GO:0050709; F:GO:0004722	P:protein dephosphorylation; P:negative regulation of protein secretion; F:protein serine/threonine phosphatase activity	EC:3.1.3.16	Protein-serine/threonine phosphatase	PF13672 (PFAM); IPR036457 (G3DSA:3.60.40.GENE3D); PTHR13832:SF321 (PANTHER); IPR015655 (PANTHER); IPR001932 (PROSITE_PROFILES); IPR001932 (CDD); IPR036457 (SUPERFAMILY)	P:GO:0006470; F:GO:0004722; F:GO:0016791	P:protein dephosphorylation; F:protein serine/threonine phosphatase activity; F:phosphatase activity
	T6SS-associated protein TagF	WP_003083642.1	-	-	-	-	PA0076	TagF1	4	10	1.16484	0.0192381		1.16843	0.0274376		2.62685	7.20785e-06	Up	1.83572	1.4387e-05	Higher	PA0076	2.25345	8.54e-05	S					IPR017748 (PFAM); IPR038225 (G3DSA:3.40.1730.GENE3D); IPR017748 (PIRSF); IPR017748 (TIGRFAM)	no GO terms	no GO terms
	T6SS membrane subunit TssM	WP_003083648.1	TssM	T6CP015346	99.83	0			32	76	1.11832	0.107912		-1.00562	0.828305		2.47666	1.98989e-08	Up							S	C:GO:0016021	C:integral component of membrane			Coil (COILS); Coil (COILS); IPR010623 (PFAM); IPR009612 (PFAM); IPR025743 (PFAM); IPR017731 (TIGRFAM); mobidb-lite (MOBIDB_LITE); PTHR36153:SF1 (PANTHER); PTHR36153 (PANTHER); cd00882 (CDD); IPR027417 (SUPERFAMILY)	no GO terms	no GO terms
	DotU family type VI secretion system protein	WP_014603461.1	TssL	T6CP005095	99.77	0	PA0078	TssL1	13	38	1.08543	0.098824		-1.24645	0.000798473		2.46185	6.08427e-06	Up	1.69652	0.00221504	Higher	PA0078	2.36306	7.32e-06	N	C:GO:0016021	C:integral component of membrane			IPR036737 (G3DSA:3.30.1330.GENE3D); IPR017733 (TIGRFAM); IPR017732 (TIGRFAM); IPR038522 (G3DSA:1.25.40.GENE3D); IPR017732 (PFAM); IPR006665 (PFAM); mobidb-lite (MOBIDB_LITE); PTHR30329:SF4 (PANTHER); PTHR30329 (PANTHER); IPR006665 (PROSITE_PROFILES); IPR006665 (CDD); IPR036737 (SUPERFAMILY)	no GO terms	no GO terms
	T6SS baseplate subunit TssK	WP_003115052.1	TssK	T6CP015347	100	0	PA0079	TssK1	18	58	1.02054	0.546271		1.09251	0.0517074		2.08071	9.63132e-07	Up	2.48214	7.49017e-06	Higher	PA0079	2.16053	0.000360875	S					IPR010263 (TIGRFAM); IPR010263 (PFAM); IPR010263 (PANTHER); PTHR35566:SF1 (PANTHER)	no GO terms	no GO terms
	T6SS lipoprotein TssJ	WP_003083660.1	TssJ	T6CP015348	100	5.85e-112	PA0080	TssJ1	3	5	-1.07023	0.617872		1.06323	0.712826		2.66921	0.000700333	Up	2.24798	0.00590583	Higher	PA0080	2.23879	0.000767882	S					IPR017734 (PFAM); IPR017734 (TIGRFAM); IPR038706 (G3DSA:2.60.40.GENE3D); IPR017734 (PANTHER); PS51257 (PROSITE_PROFILES)	no GO terms	no GO terms
	T6SS-associated FHA domain protein TagH	WP_034065165.1	-	-	-	-	PA0081	Fha1	12	30	1.0256	0.553119		1.16618	0.00872811		2.3867	2.63376e-07	Up				fha1	1.58351	0.0173179	T	F:GO:0005515	F:protein binding			G3DSA:2.60.200.20 (GENE3D); IPR000253 (PFAM); IPR017735 (TIGRFAM); mobidb-lite (MOBIDB_LITE); mobidb-lite (MOBIDB_LITE); mobidb-lite (MOBIDB_LITE); mobidb-lite (MOBIDB_LITE); IPR000253 (PROSITE_PROFILES); IPR000253 (CDD); IPR008984 (SUPERFAMILY)	F:GO:0005515	F:protein binding
	T6SS protein TssA	WP_003083664.1	TssA	T6CP005098	99.419	0	PA0082	TssA1	11	39	1.00218	0.981212		-1.03769	0.623636		2.22285	9.96817e-05	Up	2.24826	8.82115e-05	Higher	PA0082	1.82341	0.00545588	S	C:GO:0033104	C:type VI protein secretion system complex			IPR010657 (PFAM); IPR017740 (TIGRFAM); IPR017740 (PANTHER)	no GO terms	no GO terms
	T6SS contractile sheath small subunit	WP_003083666.1	TssB	T6CP015349	100	2.6e-125	PA0083	TssB1	5	35	1.02022	0.591369		-1.05019	0.233535		2.63787	8.92977e-07	Up	2.73504	0.0101369	Higher	PA0083	3.51261	2.64e-06	S					IPR008312 (PFAM); IPR008312 (TIGRFAM); IPR008312 (PIRSF); PTHR35850:SF1 (PANTHER); IPR008312 (PANTHER)	no GO terms	no GO terms
	T6SS contractile sheath large subunit	WP_003083668.1	TssC	T6CP005100	99.799	0	PA0084	TssC1	12	53	1.28674	0.00776249		1.48835	0.00114183		2.997	4.74565e-05	Up	2.70262	0.000163338	Higher	PA0084	3.52904	9.59e-07	S					IPR044032 (PFAM); IPR010269 (TIGRFAM); IPR044031 (PFAM); IPR010269 (PANTHER); PTHR35565:SF3 (PANTHER)	no GO terms	no GO terms
	T6SS receptor/chaperone Hcp	WP_003083670.1	TssD	T6CP015351	100	1.28e-120	PA0085	Hcp1	5	52	-1.05832	0.44311		1.1826	0.0578434		1.33938	0.00977411		3.66624	4.5819e-06	Higher	hcp1	4.92319	9.57e-20	S	F:GO:0042802; C:GO:0005576	F:identical protein binding; C:extracellular region			IPR036624 (G3DSA:2.30.110.GENE3D); IPR008514 (TIGRFAM); IPR008514 (PFAM); PTHR36152 (PANTHER); PTHR36152:SF5 (PANTHER); IPR036624 (SUPERFAMILY)	no GO terms	no GO terms
	T6SS accessory protein TagJ	WP_003119488.1	-	-	-	-	PA0086	TagJ1	7	18	1.30948	0.0014136		-1.23743	0.00478693		2.67466	2.15694e-05	Up	3.11071	9.0972e-05	Higher	PA0086	2.67942	7.96e-06	S	F:GO:0005515	F:protein binding			Coil (COILS); PF14559 (PFAM); IPR011990 (G3DSA:1.25.40.GENE3D); IPR009211 (PFAM); IPR009211 (PIRSF); SSF144059 (SUPERFAMILY)	F:GO:0005515	F:protein binding
	T6SS baseplate subunit TssE	WP_003083674.1	TssE	T6CP015352	100	4.85e-121	PA0087	TssE1	3	5	1.28305	0.0543041		-1.11407	0.351218		3.03393	0.000152456	Up				PA0087	2.52893	4.73e-06	S					IPR017737 (TIGRFAM); IPR007048 (PFAM); PTHR38595 (PANTHER); PTHR38595:SF1 (PANTHER); SSF160719 (SUPERFAMILY)	no GO terms	no GO terms
	T6SS baseplate subunit TssF	WP_003083676.1	TssF	T6CP001463	100	0	PA0088	TssF1	13	28	1.13712	0.0244569		1.0818	0.121534		2.42469	4.16123e-05	Up	3.57273	0.000345425	Higher	PA0088	2.63065	5.31e-06	S					IPR010272 (TIGRFAM); IPR010272 (PIRSF); IPR010272 (PFAM); PTHR35370:SF1 (PANTHER); IPR010272 (PANTHER)	no GO terms	no GO terms
	T6SS baseplate subunit TssG	WP_003083679.1	TssG	T6CP015354	99.138	0	PA0089	TssG1	3	4	1.1389	0.693069		1.04001	0.902514		2.44768	0.000183489	Up	1.56872	0.16244		PA0089	3.1288	8.37e-08	S					IPR010732 (PFAM); IPR010732 (TIGRFAM); PTHR35564:SF4 (PANTHER); IPR010732 (PANTHER)	no GO terms	no GO terms
	T6SS ATPase TssH	WP_034085220.1	TssH	T6CP001465	99.667	0	PA0090	ClpV1	34	151	1.34883	0.000527602		1.55171	1.21023e-06	Up	2.68975	1.38461e-08	Up	2.18094	9.74371e-05	Higher	clpV1	3.56148	5.89e-09	O	P:GO:0019538; F:GO:0005524; F:GO:0016887	P:protein metabolic process; F:ATP binding; F:ATP hydrolysis activity	EC:3.6.1	Acting on acid anhydrides	Coil (COILS); Coil (COILS); Coil (COILS); IPR001270 (PRINTS); IPR036628 (G3DSA:1.10.1780.GENE3D); IPR027417 (G3DSA:3.40.50.GENE3D); IPR041546 (PFAM); IPR003959 (PFAM); IPR027417 (G3DSA:3.40.50.GENE3D); IPR027417 (G3DSA:3.40.50.GENE3D); IPR019489 (PFAM); IPR003959 (PFAM); IPR017729 (TIGRFAM); G3DSA:1.10.8.60 (GENE3D); mobidb-lite (MOBIDB_LITE); PTHR43572 (PANTHER); PTHR43572:SF60 (PANTHER); IPR018…	F:GO:0005524; F:GO:0016887	F:ATP binding; F:ATP hydrolysis activity
	T6SS spike protein VgrG1a	WP_073660211.1	TssI	T6CP015356	99.844	0	PA0091	VgrG1	15	37	1.82329	0.004907	Up	2.52665	6.55343e-05	Up	3.87167	3.71209e-06	Up	1.18341	0.117641		vgrG1	3.23283	4.23e-08	S					G3DSA:2.30.110.50 (GENE3D); IPR037026 (G3DSA:2.40.50.GENE3D); PF05954 (PFAM); IPR006531 (PFAM); IPR006533 (TIGRFAM); G3DSA:3.55.50.10 (GENE3D); IPR017847 (TIGRFAM); G3DSA:4.10.220.110 (GENE3D); PTHR32305 (PANTHER); SSF69279 (SUPERFAMILY); SSF69349 (SUPERFAMILY); SSF69279 (SUPERFAMILY); SSF69255 (SUPERFAMILY)	no GO terms	no GO terms
	Immunity protein Tsi6	WP_003111794.1	-	-	-	-
	T6SS immunity factor Tis1	WP_003083689.1	-	-	-	-
	T6SS effector (p)ppApp synthetase Tas1	WP_003083691.1	-	-	-	-			7	14	1.67345	0.0107671	Up	2.18811	0.000829123	Up	2.61691	0.000147197	Up							S	C:GO:0016021	C:integral component of membrane			IPR008727 (PFAM); G3DSA:2.60.200.60 (GENE3D); cd14742 (CDD)	no GO terms	no GO terms
	T6SS effector EagT6	WP_003083692.1	-	-	-	-	PA0094	EagT6	5	18	-1.2963	0.0238922		-1.10332	0.0228358		1.00964	0.853031		2.43437	0.00277136	Higher	PA0094	1.27048	0.174965	S					IPR014894 (PFAM); G3DSA:3.40.1000.10 (GENE3D); IPR016123 (SUPERFAMILY)	no GO terms	no GO terms
	T6SS spike protein VgrG1b	WP_014603464.1	TssI	T6CP001467	99.46	0	PA0095	vgrG1b	16	34	1.16707	0.0975103		1.87966	0.000226462	Up	1.66165	0.00397213	Up	1.59094	0.0012212	Higher	PA0095	2.10211	3.5e-08	U					PF05954 (PFAM); IPR006531 (PFAM); IPR037026 (G3DSA:2.40.50.GENE3D); IPR006533 (TIGRFAM); IPR017847 (TIGRFAM); G3DSA:2.30.110.50 (GENE3D); G3DSA:3.55.50.10 (GENE3D); IPR010609 (PFAM); G3DSA:4.10.220.110 (GENE3D); mobidb-lite (MOBIDB_LITE); mobidb-lite (MOBIDB_LITE); mobidb-lite (MOBIDB_LITE); mobidb-lite (MOBIDB_LITE); PTHR32305:SF11 (PANTHER); PTHR32305 (PANTHER); SSF69349 (SUPERFAMILY); SSF69255…	no GO terms	no GO terms
	DUF6484 domain-containing protein	WP_003083695.1	-	-	-	-
	DUF2169 domain-containing protein	WP_023436119.1	-	-	-	-	PA0097	hypothetical protein	2	2													PA0097	1.63529	0.000357141	S					IPR018683 (PFAM); mobidb-lite (MOBIDB_LITE)	no GO terms	no GO terms
	3-oxoacyl-ACP synthase	WP_003083697.1	-	-	-	-	PA0098	hypothetical protein	3	4	-1.09465	0.124974		1.28071	0.00476125		1.04315	0.383682					PA0098	1.67093	0.00523048	M	F:GO:0004315	F:3-oxoacyl-[acyl-carrier-protein] synthase activity	EC:2.3.1.41; EC:2.3.1.85	Beta-ketoacyl-[acyl-carrier-protein] synthase I; Fatty-acid synthase system	IPR016039 (G3DSA:3.40.47.GENE3D); IPR016039 (SUPERFAMILY)	F:GO:0016746	F:acyltransferase activity
	T6SS effector Dnase Tse7	WP_003083698.1	-	-	-	-
	hypothetical protein	WP_003083699.1	-	-	-	-	PA0100	hypothetical protein	5	12	-1.01268	0.766858		1.30005	0.00176541		-1.12134	0.0229685		2.75277	0.0132355	Higher				S					SSF63829 (SUPERFAMILY)	no GO terms	no GO terms
Effectors	T6SS spike protein VgrG1a	WP_073660211.1	TssI	EFF00010 (-)	99.7	0	PA0091	VgrG1	15	37	1.82329	0.004907	Up	2.52665	6.55343e-05	Up	3.87167	3.71209e-06	Up	1.18341	0.117641		vgrG1	3.23283	4.23e-08	S					G3DSA:2.30.110.50 (GENE3D); IPR037026 (G3DSA:2.40.50.GENE3D); PF05954 (PFAM); IPR006531 (PFAM); IPR006533 (TIGRFAM); G3DSA:3.55.50.10 (GENE3D); IPR017847 (TIGRFAM); G3DSA:4.10.220.110 (GENE3D); PTHR32305 (PANTHER); SSF69279 (SUPERFAMILY); SSF69349 (SUPERFAMILY); SSF69279 (SUPERFAMILY); SSF69255 (SUPERFAMILY)	no GO terms	no GO terms
	T6SS effector (p)ppApp synthetase Tas1	WP_003083691.1	Tas	EFF01038 (Tas)	100	0			7	14	1.67345	0.0107671	Up	2.18811	0.000829123	Up	2.61691	0.000147197	Up							S	C:GO:0016021	C:integral component of membrane			IPR008727 (PFAM); G3DSA:2.60.200.60 (GENE3D); cd14742 (CDD)	no GO terms	no GO terms
	T6SS effector EagT6	WP_003083692.1	-	-	-	-	PA0094	EagT6	5	18	-1.2963	0.0238922		-1.10332	0.0228358		1.00964	0.853031		2.43437	0.00277136	Higher	PA0094	1.27048	0.174965	S					IPR014894 (PFAM); G3DSA:3.40.1000.10 (GENE3D); IPR016123 (SUPERFAMILY)	no GO terms	no GO terms
	T6SS spike protein VgrG1b	WP_014603464.1	TssI	EFF00011 (-)	99.2	0	PA0095	vgrG1b	16	34	1.16707	0.0975103		1.87966	0.000226462	Up	1.66165	0.00397213	Up	1.59094	0.0012212	Higher	PA0095	2.10211	3.5e-08	U					PF05954 (PFAM); IPR006531 (PFAM); IPR037026 (G3DSA:2.40.50.GENE3D); IPR006533 (TIGRFAM); IPR017847 (TIGRFAM); G3DSA:2.30.110.50 (GENE3D); G3DSA:3.55.50.10 (GENE3D); IPR010609 (PFAM); G3DSA:4.10.220.110 (GENE3D); mobidb-lite (MOBIDB_LITE); mobidb-lite (MOBIDB_LITE); mobidb-lite (MOBIDB_LITE); mobidb-lite (MOBIDB_LITE); PTHR32305:SF11 (PANTHER); PTHR32305 (PANTHER); SSF69349 (SUPERFAMILY); SSF69255…	no GO terms	no GO terms
	T6SS effector muramidase Tse3	WP_003092026.1	Tge	EFF76645 (Tge)	100	0	PA3484	Tse3	7	13	1.20684	0.153922		1.48835	0.0153541		4.17113	7.09876e-05	Up	3.16322	0.0105595	Higher	PA3484	1.72809	0.00239254		F:GO:0003796; F:GO:0046872	F:lysozyme activity; F:metal ion binding	EC:3.2.1.17	Lysozyme	G3DSA:1.10.530.10 (GENE3D)	no GO terms	no GO terms
	T6SS effector Tse5	WP_003090544.1	Tse	EFF01036 (Tse)	99.8	0	PA2684	Tse5	24	46	1.15655	0.0551133		1.63265	1.00754e-05	Up	2.94291	4.79831e-06	Up	1.67721	0.00099207	Higher	PA2684	2.52368	3.69e-06	M					Coil (COILS); IPR001826 (PRINTS); IPR031325 (PFAM); IPR006530 (TIGRFAM); IPR045351 (PFAM); G3DSA:2.180.10.10 (GENE3D); IPR022385 (TIGRFAM); IPR001826 (PFAM); G3DSA:2.180.10.10 (GENE3D); mobidb-lite (MOBIDB_LITE); PTHR32305 (PANTHER); PTHR32305:SF15 (PANTHER); SSF69304 (SUPERFAMILY)	no GO terms	no GO terms
